# Supplementary material for: Mutagenesis of human genomes by endogenous mobile elements on a population scale
Source: HighWire-hosted journal article supplement (doi:10.1101/gr.275323.121), 2021-11-12
Supplement: Supplemental_Table_S1.xlsx [file Supplemental_Table_S1.xlsx]

## Sheet: A
Supplemental_Table_S1.xlxs. MEI collection.
A. Merged MEI calls.
CHR	POS	MEI Type	INFO	1kGP2504_AF	1kGP698_AF	Amish_AF	JHS_AF	GTEx100bp_AF	GTEx150bp_AF	UKBB50k_AF
1	62413	ALU	TSD=null;ASSESS=4;INTERNAL=OR4F5,PROMOTER;SVTYPE=ALU;SVLEN=279;MEINFO=AluY,1,280,-;DIFF=0.77:g9a,c10t,c20t,g52a,c53t,g54t,c98t,g110a,g139a,c150t,c154t,c172t,c174t,c213t,g214a,c230a,g231a,c236t,c238t,c268t,c276t;LP=8;RP=16;RA=-1;PRIOR=false;SR=1;AF=0.000951475;AC=2	.	.	0.000951475	.	.	.	.
1	600172	ALU	TSD=null;ASSESS=3;INTERNAL=LOC101928626,TERMINATOR;SVTYPE=ALU;SVLEN=279;MEINFO=AluY,1,280,-;DIFF=0.93:g5a,c8t,g58a,g65a,g75c,g139a,g143a,g151a,g155a,c213t,g231a,g237a,c243a,c255t,c260t,g269a,c276t;LP=23;RP=4;RA=2.524;PRIOR=false;SR=5;AF=0.00505825;AC=33	.	.	.	0.00505825	.	.	.
1	626221	ALU	TSD=null;ASSESS=1;INTERNAL=NR_125957,TERMINATOR;SVTYPE=ALU;SVLEN=279;MEINFO=AluY,1,280,-;DIFF=0.94:g5a,c20t,g42a,c53t,c57t,i65gt,c78t,t93c,c98t,c138t,g152c,g175a,g207a,g214a,c218t,g237a,g261a,g269a;LP=5;RP=5;RA=0;PRIOR=false;SR=0;AF=0.000952381;AC=1	.	.	.	.	.	0.000952381	.
1	632317	LINE1	TSD=null;ASSESS=3;INTERNAL=MIR6723,TERMINATOR;SVTYPE=LINE1;SVLEN=5734;MEINFO=L1Ambig,284,6018,+;DIFF=0.05:n1-4365,c4374t,c4425t,g4449a,c4458t,g4510a,n4517,n4527,t4557c,g4558a,a4580g,c4626t,c4663a,g4670c,t4674c,n4685-5229,a5233g,g5268a,t5316a,t5325c,g5376a,c5391t,g5420a,c5427g,c5434t,t5455a,g5465a,c5472a,g5474a,t5486a,c5508a,n5520-5645,t5649g,t5700g,a5712g,a5736g,t5737c,t5757c,a5771g,c5790a,a5793g…	.	.	.	0.000363769	.	.	.
1	632549	ALU	TSD=null;ASSESS=1;INTERNAL=MIR6723,PROMOTER;SVTYPE=ALU;SVLEN=279;MEINFO=AluY,1,280,-;DIFF=0.98:g11a,g21a,c48t,c98t,c138t,g151a,g152c,c154t,g162a,g207a,c218g,c230t,c236t,c238t,g261a,g269a;LP=5;RP=13;RA=-1.379;PRIOR=false;SR=0;AF=0.000537827;AC=3	.	.	.	0.000537827	.	.	.
1	633722	LINE1	TSD=null;ASSESS=4;INTERNAL=MIR6723,PROMOTER;SVTYPE=LINE1;SVLEN=2403;MEINFO=L1Ambig,3616,6019,+;DIFF=0.13:n1-2272,g2293t,g2310a,t2331a,g2350t,c2373g,c2376t,g2380t,g2390a,c2400a,t2410a,n2430-2451,c2565a,g2611c,g2623c,a2635c,n2638,n2640,a2652g,t2655a,c2670a,n2677,n2684,t2687a,n2688,g2723a,n2725,c2735t,t2737a,n2742-3112,g3117a,a3163g,g3196t,t3209c,c3246t,n3262-3663,n3737,g3787c,t3804c,a3819c,t3837a,c…	.	.	.	0.000304971	.	.	.
1	634637	LINE1	TSD=null;ASSESS=2;INTERNAL=NR_106781,PROMOTER;SVTYPE=LINE1;SVLEN=1264;MEINFO=L1Ambig,4754,6018,+;DIFF=0.02:n1-4753,g4761a,g4769a,c4779t,g4793a,c4797t,c4814t,t4821c,g4827a,t4839c,i4860a,c4866t,t4869c,c4871g,n4887-6019;LP=1;RP=6;RA=-2.585;ISTP=-1;PRIOR=false;SR=0;AF=0.000244618;AC=1	0.000244618	.	.	.	.	.	.
1	713039	ALU	TSD=null;ASSESS=4;INTERNAL=LOC100133331,TERMINATOR;SVTYPE=ALU;SVLEN=279;MEINFO=AluY,1,280,+;DIFF=1:c10t,g21a,c30t,c57t,c114g,c138a,g143a,g145a,g175a,g183c,g199a,c236t;LP=14;RP=45;RA=-1.684;PRIOR=false;SR=3;AF=0.00388078;AC=25	.	.	.	0.00388078	.	.	.
1	758508	ALU	TSD=AAAAATTACCATTGTC;ASSESS=5;INTERNAL=NR_033908,TERMINATOR;SVTYPE=ALU;SVLEN=281;MEINFO=AluYc1,0,281,+;DIFF=0.94:g148a;LP=5;RP=7;RA=-0.485;PRIOR=false;SR=7;AF=0.00019992;AC=1	0.00019992	.	.	.	.	.	.
1	827186	LINE1	TSD=null;ASSESS=3;INTERNAL=NR_024321,3_UTR;SVTYPE=LINE1;SVLEN=5413;MEINFO=L1Ambig,605,6018,+;DIFF=0.06:n1-604,d674-676,n678,c718t,g865t,g999a,n1036-6019;LP=1;RP=16;RA=-4;ISTP=0;PRIOR=false;SR=4;GENE=LINC00115;AF=0.000199681;AC=1	0.000199681	.	.	.	.	.	.
1	852829	ALU	TSD=AAAAAAGTAATA;ASSESS=5;INTERNAL=NR_047525,INTRONIC;SVTYPE=ALU;SVLEN=281;MEINFO=AluYb6_2,0,281,+;DIFF=1:c57t,c64t,c98a,i127aaaa,t144c,a210g,g211a,t219c,c236t;LP=36;RP=21;RA=0.778;PRIOR=false;SR=21;AF=0.000199681;AC=1	0.000199681	.	.	.	.	.	.
1	866135	ALU	TSD=AGAAACGAACCTACAC;ASSESS=5;INTERNAL=NR_027055,TERMINATOR;SVTYPE=ALU;SVLEN=281;MEINFO=AluY,0,281,+;DIFF=1:g11a,c53t,c57t,a95g,g110t,i127aaaaaaa,c142a,t144c,a188g,g197c,c230g,c260t;LP=8;RP=16;RA=-1;PRIOR=false;SR=11;AF=0.000199681;AC=1	0.000199681	.	.	.	.	.	.
1	868485	SVA	TSD=GGATTTCACAGATTT;ASSESS=5;INTERNAL=NR_027055,3_UTR;SVTYPE=SVA;SVLEN=1310;MEINFO=SVA,6,1316,-;DIFF=0.21:n1-1014,a1053g,g1067a,a1079g,c1129g,c1146a,c1163a,c1164t,t1267c,g1268a,g1310t;LP=84;RP=1;RA=6.392;PRIOR=false;SR=50;AF=0.019341;AC=27;GENE=FAM41C	.	0.019341	.	.	.	.	.
1	876902	LINE1	TSD=null;ASSESS=3;INTERNAL=NR_027055,PROMOTER;SVTYPE=LINE1;SVLEN=3139;MEINFO=L1Ambig,2879,6018,+;DIFF=0.04:n1-2878,t2902c,n2919,t2951a,n2957,g2962c,n2975,n3029-3095,c3115a,a3138g,a3163g,a3204g,c3281a,t3300c,n3355-6019;LP=245;RP=1158;RA=-2.241;ISTP=0;PRIOR=false;SR=366;AF=0.000716332;AC=1	.	0.000716332	.	.	.	0.00520833	.
1	971019	LINE1	TSD=null;ASSESS=4;INTERNAL=PLEKHN1,INTRONIC;SVTYPE=LINE1;SVLEN=5530;MEINFO=L1Ambig,488,6018,-;DIFF=0.07:n1-5307,t5316a,t5325c,c5333t,c5391t,n5442-5509,t5535g,g5538a,n5561,g5573a,n5585-5608,n5695-6019;LP=10;RP=11;RA=-0.138;ISTP=0;PRIOR=false;SR=19;AF=0.000594339;AC=59	.	.	.	.	.	.	0.000594339
1	1185956	ALU	TSD=null;ASSESS=4;INTERNAL=TTLL10,INTRONIC;SVTYPE=ALU;SVLEN=279;MEINFO=AluYb,1,280,-;DIFF=0.95:c57t,c64t,t144c,c174t,g199a,g207a,c213t,c248g,c251t,c263a,d268-281,a252g;LP=74;RP=11;RA=2.75;PRIOR=false;SR=35;AF=0.000101924;AC=10	.	.	.	.	.	.	0.000101924
1	1190260	ALU	TSD=null;ASSESS=4;INTERNAL=NM_001130045,INTRONIC;SVTYPE=ALU;SVLEN=279;MEINFO=AluY,1,280,+;DIFF=0.99:c48t,g54a,g58a,g65a,g79a,c98t,g110a,c138t,g155a,g196t,g199t,g207a,c218g,c236a,c238t,g269a,g271a,c276t;LP=195;RP=163;RA=0.259;PRIOR=false;SR=19;AF=0.000399361;AC=2	0.000399361	.	.	0.000450315	.	.	.
1	1219225	LINE1	TSD=GACCCCC;ASSESS=5;INTERNAL=SDF4,3_UTR;SVTYPE=LINE1;SVLEN=5962;MEINFO=L1Ambig,56,6018,+;DIFF=0.04:n1-4622,t4680c,n4716-4906,t4937a,n4945-5011,a5092g,c5093a,g5097a,c5109t,c5114t,n5135-5192,g5208c,g5212c,c5214t,g5222a,n5268-5292,n5297,n5304,n5308,t5316a,t5325c,n5337,n5350,c5352a,n5353-5354,t5355a,n5363-5363,n5366,n5369-5612,a5632t,n5689-5765,c5788t,t5827a,n5842-5896,n5901,n5929-5989,g6014a;LP=30;…	.	.	.	.	.	.	1.01521e-05
1	1270223	ALU	TSD=CTCGGGTACATCTTT;ASSESS=5;INTERNAL=NM_194457,INTRONIC;SVTYPE=ALU;SVLEN=279;MEINFO=AluYc1,2,281,-;DIFF=1:c8a,g148a,g245a;LP=58;RP=85;RA=-0.551;PRIOR=false;SR=34;AF=0.000399361;AC=2	0.000399361	.	.	.	.	.	.
1	1321904	LINE1	TSD=null;ASSESS=3;INTERNAL=CPSF3L,INTRONIC;SVTYPE=LINE1;SVLEN=4605;MEINFO=L1Ambig,1413,6018,-;DIFF=0.07:n1-4715,g4750c,t4821g,n4840-6019;LP=9;RP=6;RA=0.585;ISTP=-1;PRIOR=false;SR=1;AF=2.01471e-05;AC=2	.	.	.	.	.	.	2.01471e-05
1	1375678	SVA	TSD=null;ASSESS=3;INTERNAL=NM_001127230,PROMOTER;SVTYPE=SVA;SVLEN=1240;MEINFO=SVA,75,1315,+;DIFF=0.35:n1-945,g1009t,c1019t,a1053g,g1067a,a1079g,t1109c,c1129g,c1157t,g1268a,t1292c;LP=4;RP=17;RA=-2.087;PRIOR=false;SR=6;AF=0.000199681;AC=1	0.000199681	.	.	.	.	.	.
1	1375684	SVA	TSD=AAAAAA;ASSESS=5;INTERNAL=NM_001127230,PROMOTER;SVTYPE=SVA;SVLEN=1240;MEINFO=SVA,75,1315,-;DIFF=0.36:n1-781,c801g,a825g,a827g,a836g,a838g,g840t,g880c,a886g,g898a,n907,t922g,a931g,a934t,g938a,c945a,g1009t,c1019t,a1053g,g1067a,a1079g,t1109c,c1129g,c1157t,g1268a,t1292c;LP=3;RP=18;RA=-2.585;PRIOR=false;SR=9;AF=0.000716332;AC=1	.	0.000716332	.	.	.	.	.
1	1377304	SVA	TSD=dATTTGTCTTCAGGAAAGTTTTTCTTT;ASSESS=5;INTERNAL=AURKAIP1,PROMOTER;SVTYPE=SVA;SVLEN=1267;MEINFO=SVA,48,1315,-;DIFF=0.3:n1-1039,g1051a,a1053g,g1067a,a1079g,c1129g,c1163a,c1164t,t1267c,g1268a,g1310t;LP=119;RP=193;RA=-0.698;PRIOR=false;SR=116;AF=0.002852;AC=19	.	.	.	0.002852	.	.	.
1	1377330	SVA	TSD=null;ASSESS=3;INTERNAL=NM_001127230,PROMOTER;SVTYPE=SVA;SVLEN=1240;MEINFO=SVA,75,1315,+;DIFF=0.34:n1-800,g840c,t847g,t862c,g880c,g938a,c945a,t970c,t985c,n999-1013,g1051a,a1053g,g1067a,a1079g,c1129g,c1163a,c1164t,t1267c,g1268a,g1310t;LP=21;RP=28;RA=-0.415;PRIOR=false;SR=16;AF=0.00143266;AC=2	0.000399361	0.00143266	.	.	.	.	.
1	1455216	SVA	TSD=null;ASSESS=3;INTERNAL=NM_001039211,INTRONIC;SVTYPE=SVA;SVLEN=345;MEINFO=SVA,970,1315,+;DIFF=0.22:n1-969,g1009t,c1019t,a1041g,a1053g,g1067a,a1068g,a1079g,a1102g,a1116g,c1129g,a1132g,c1157t,a1178g,g1268a,t1292c;LP=1;RP=12;RA=-3.585;PRIOR=false;SR=4;GENE=ATAD3C;AF=0.00019976;AC=1	0.00019976	.	.	.	.	.	.
1	1455841	SVA	TSD=null;ASSESS=3;INTERNAL=ATAD3C,EXON_6;SVTYPE=SVA;SVLEN=728;MEINFO=SVA,587,1315,+;DIFF=0.12:n1-1005,g1009t,a1053g,g1067a,a1079g,n1130-1149,n1213,g1268a,c1289g,t1292c;LP=1;RP=9;RA=-3.17;PRIOR=false;SR=6;AF=1.00776e-05;AC=1	.	.	.	.	.	.	1.00776e-05
1	1580554	SVA	TSD=null;ASSESS=3;INTERNAL=NM_014188,PROMOTER;SVTYPE=SVA;SVLEN=281;MEINFO=SVA,1034,1315,+;DIFF=0.13:n1-1033,g1048a,a1053g,c1056a,g1067a,a1079g,t1124c,a1175g,c1177a,t1197a,a1213g,n1218-1316;LP=69;RP=61;RA=0.178;PRIOR=false;SR=19;AF=0.000599042;AC=3	0.000599042	.	.	.	.	.	.
1	1580568	ALU	TSD=TAAACAGATGCTTG;ASSESS=5;INTERNAL=NM_014188,PROMOTER;SVTYPE=ALU;SVLEN=236;MEINFO=AluY,45,281,+;DIFF=1:g9a,c10t,g25a,c57t,c64t,c138t,g175a,g207a,c213t,a216g,g228a,c236t,c268g;LP=36;RP=41;RA=-0.188;PRIOR=false;SR=23;AF=0.000599042;AC=3	0.000599042	.	.	.	.	.	.
1	1580780	HERVK	TSD=null;ASSESS=4;INTERNAL=SSU72,PROMOTER;SVTYPE=HERVK;SVLEN=8687;MEINFO=HERVK,71,8758,+;DIFF=0.03:n1-8119,g8168a,n8227,n8230-8481,a8529t,i8562cg,t8562a,g8577a,t8663c,t8667a,n8696-8759;LP=319;RP=101;RA=1.659;PRIOR=false;SR=16;AF=0.00030021;AC=2	.	.	.	0.00030021	.	.	.
1	1582464	SVA	TSD=null;ASSESS=3;INTERNAL=NM_014188,PROMOTER;SVTYPE=SVA;SVLEN=1240;MEINFO=SVA,75,1315,+;DIFF=0.28:n1-983,g1009t,c1019t,a1053g,g1067a,a1079g,c1129g,c1157t,g1268a,t1292c;LP=2;RP=15;RA=-2.907;PRIOR=false;SR=10;AF=0.000199681;AC=1	0.000199681	.	.	.	.	.	.
1	1593866	ALU	TSD=AAAGAAAATGCGGGTGCTT;ASSESS=5;INTERNAL=FNDC10,TERMINATOR;SVTYPE=ALU;SVLEN=76;MEINFO=AluYb,205,281,+;DIFF=0.83:g46t,c48t,g52a,g58a,g65a,g79a,c88t,g90a,c106a,g139a,c150t,g151a,g175a,c236t,i252gcagtcc,c248g,a252g;LP=12;RP=20;RA=-0.737;PRIOR=false;SR=41;AF=0.00090063;AC=6	.	.	.	0.00090063	.	.	.
1	1643216	SVA	TSD=null;ASSESS=3;INTERNAL=NM_033486,INTRONIC;SVTYPE=SVA;SVLEN=305;MEINFO=SVA,1010,1315,+;DIFF=0.2:n1-1009,n1028,a1053g,g1067a,a1079g,c1129g,c1146a,c1163a,c1164t,t1267c,g1268a,g1310t;LP=1;RP=91;RA=-6.508;PRIOR=false;SR=16;AF=0.0100287;AC=14;GENE=CDK11B	.	0.0100287	0.00719424	0.00285371	.	.	.
1	1657089	ALU	TSD=null;ASSESS=4;INTERNAL=NM_033486,INTRONIC;SVTYPE=ALU;SVLEN=279;MEINFO=AluY,1,280,+;DIFF=0.96:c4t,g5a,g9a,g11a,c53t,c98t,g110a,g152c,g153a,c174t,g214a,g228a,c230t,g231a,c236t,c238t,c241t,c250t,c260t,g261t,g265a,c268t;LP=17;RP=80;RA=-2.234;PRIOR=false;SR=24;AF=0.000199681;AC=1	0.000199681	.	.	.	.	.	.
1	1692916	ALU	TSD=null;ASSESS=4;INTERNAL=NR_002946,PROMOTER;SVTYPE=ALU;SVLEN=279;MEINFO=AluYa3_4,1,280,-;DIFF=0.99:c48t,c98a,g145a,c174t,g237c;LP=10;RP=12;RA=-0.263;PRIOR=false;SR=1;AF=0.0026087;AC=3	0.000599042	.	.	0.00480336	.	0.0026087	.
1	1722573	ALU	TSD=null;ASSESS=4;INTERNAL=CDK11A,INTRONIC;SVTYPE=ALU;SVLEN=279;MEINFO=AluSg,1,280,-;DIFF=0.47:c4t,g5a,g9a,c10t,g11a,c20t,c48t,g49c,g54a,c57t,d65-66,c80g,c111t,i127n,a163g,g198a,t200g,c207a,g208a,c214t,g215a,g219c,c237a,g240a,c261a,a265g,c269t,c277t,d280-282;LP=6;RP=6;RA=0;PRIOR=false;SR=5;AF=0.064245;AC=428	.	.	.	0.064245	.	.	.
1	1729678	LINE1	TSD=null;ASSESS=3;INTERNAL=SLC35E2,3_UTR;SVTYPE=LINE1;SVLEN=171;MEINFO=L1Ta,5848,6019,-;DIFF=0.03:n1-5695,a5712g,c5744t,n5748-5847,n5869,n5886-5894,n5896,n5963-6019;LP=4;RP=10;RA=-1.322;ISTP=-1;PRIOR=false;SR=5;AF=3.0259e-05;AC=3	.	.	.	.	.	.	3.0259e-05
1	1746195	ALU	TSD=TTTTTTTTTT;ASSESS=5;INTERNAL=NM_001198995,TERMINATOR;SVTYPE=ALU;SVLEN=279;MEINFO=AluYa3_4,2,281,-;DIFF=0.78:c48t,c98a,g145a,c174t,g237c;LP=4;RP=20;RA=-2.322;PRIOR=false;SR=8;AF=0.000600721;AC=3	0.000600721	.	.	0.00226244	.	.	.
1	1786424	ALU	TSD=CTGAACATGTTCTTTTCT;ASSESS=5;INTERNAL=NM_002074,3_UTR;SVTYPE=ALU;SVLEN=280;MEINFO=AluYa3_4,1,281,-;DIFF=1:c98a,g145a,c174t,g237c;LP=10;RP=11;RA=-0.138;PRIOR=false;SR=15;AF=0.000199681;AC=1	0.000199681	.	.	.	.	.	.
1	1847129	ALU	TSD=null;ASSESS=4;INTERNAL=NM_002074,INTRONIC;SVTYPE=ALU;SVLEN=275;MEINFO=AluY,6,281,+;DIFF=1:c57t,c98a,c260t;LP=75;RP=51;RA=0.556;PRIOR=false;SR=26;AF=0.00173611;AC=2	0.000798722	.	.	0.000750525	.	0.00173611	.
1	1885918	ALU	TSD=AAAACAGAAAGCT;ASSESS=5;INTERNAL=NM_002074,INTRONIC;SVTYPE=ALU;SVLEN=281;MEINFO=AluYa4_2,0,281,+;DIFF=1:t89c,c96a,g145a,g237c;LP=83;RP=334;RA=-2.009;PRIOR=false;SR=135;AF=0.010745;AC=15;GENE=GNB1	0.0107827	0.010745	.	0.0264185	.	.	.
1	1889055	ALU	TSD=null;ASSESS=3;INTERNAL=NM_002074,INTRONIC;SVTYPE=ALU;SVLEN=279;MEINFO=AluSg,1,280,+;DIFF=0.85:g5a,g54a,d65-66,t78a,i129a,g152a,c153g,g215a,g238a,g240a,c261t,c277t,d282;LP=26;RP=42;RA=-0.692;PRIOR=false;SR=7;AF=0.000716332;AC=1;GENE=GNB1	0.000399361	0.000716332	.	.	.	.	.
1	1937257	ALU	TSD=GCCAGCGTGGCTTTT;ASSESS=5;INTERNAL=NM_001304360,INTRONIC;SVTYPE=ALU;SVLEN=281;MEINFO=AluYa5,0,281,-;DIFF=1:t89c,c96a,g145a,c174t,g237c;LP=15;RP=39;RA=-1.379;PRIOR=false;SR=7;AF=0.000199681;AC=1	0.000199681	.	.	.	.	.	.
1	1942242	ALU	TSD=null;ASSESS=4;INTERNAL=CFAP74,INTRONIC;SVTYPE=ALU;SVLEN=280;MEINFO=AluYb,1,281,+;DIFF=0.95:c57t,c64t,c98a,i119aaaaaa,t144c,g155a,g261a,g269a;LP=21;RP=4;RA=2.392;PRIOR=false;SR=13;AF=3.02218e-05;AC=3	.	.	.	.	.	.	3.02218e-05
1	2002308	ALU	TSD=TATATTATT;ASSESS=5;INTERNAL=CFAP74,INTRONIC;SVTYPE=ALU;SVLEN=240;MEINFO=AluYa1_1,41,281,-;DIFF=0.97:c4t,c8t,c10t,g145a,g208a,c236t;LP=18;RP=23;RA=-0.354;PRIOR=false;SR=25;AF=0.000450315;AC=3	.	.	.	0.000450315	.	.	.
1	2056682	LINE1	TSD=null;ASSESS=3;INTERNAL=PRKCZ,INTRONIC;SVTYPE=LINE1;SVLEN=1034;MEINFO=L1Ambig,4984,6018,-;DIFF=0.04:n1-4983,a5006c,a5017c,n5060-5113,c5118t,t5160c,n5190-6019;LP=7;RP=1;RA=2.807;ISTP=-1;PRIOR=false;SR=1;AF=0.000258574;AC=25	.	.	.	.	.	.	0.000258574
1	2059263	SVA	TSD=CTTTCCCATTTTTATATAGTTT;ASSESS=5;INTERNAL=NM_002744,INTRONIC;SVTYPE=SVA;SVLEN=617;MEINFO=SVA,699,1316,-;DIFF=0.49:n1-406,n408,n412-413,n415-416,n418,n422-423,n426,n429-432,n434-435,n448,n450,n453-454,c455a,n456-457,n459-460,n462-467,n470,n472-477,a487c,g492a,c504t,a513g,a561c,t564c,a578g,t580c,t582c,a607g,a653g,a656g,a668g,a705g,g717a,g764c,a773g,a802g,t810c,n817-965,t970c,t985c,g1009t,a1053g,…	0.000199681	.	.	.	.	.	.
1	2194522	LINE1	TSD=null;ASSESS=1;INTERNAL=FAAP20,INTRONIC;SVTYPE=LINE1;SVLEN=1227;MEINFO=L1Ambig,4791,6018,+;DIFF=0.03:n1-4790,g4800t,n4867-4997,c5063a,n5083-6019;LP=3;RP=5;RA=-0.737;ISTP=-1;PRIOR=false;SR=0;AF=2.28802e-05;AC=2	.	.	.	.	.	.	2.28802e-05
1	2220780	ALU	TSD=AGAAAAGTTGCAAGAATAG;ASSESS=5;INTERNAL=SKI,PROMOTER;SVTYPE=ALU;SVLEN=280;MEINFO=AluYb6_2,1,281,+;DIFF=1:c57t,c64t,c98a,t144c,g151a,i210a,g211a,c236t,c260t,g265c,g277a;LP=15;RP=38;RA=-1.341;PRIOR=false;SR=19;AF=0.000150105;AC=1	.	.	.	0.000150105	.	.	.
1	2258519	ALU	TSD=TTTTTTTTTTTTTTTT;ASSESS=5;INTERNAL=NM_003036,INTRONIC;SVTYPE=ALU;SVLEN=279;MEINFO=AluSz,1,280,+;DIFF=0.74:g5a,g9a,c53t,c57t,t65g,t78a,g81a,g88t,i129a,c151t,g152a,g154a,c155t,c175a,g191c,c197t,g198a,c207t,c214t,d238-282;LP=27;RP=67;RA=-1.311;PRIOR=false;SR=10;AF=0.00954861;AC=11	.	.	.	0.00060042	.	0.00954861	.
1	2455947	SVA	TSD=TTAAGTGTATTTTT;ASSESS=5;INTERNAL=null,null;SVTYPE=SVA;SVLEN=1312;MEINFO=SVA,4,1316,-;DIFF=0.33:n1-891,g898a,t922g,a931g,a934t,g938a,c945a,g1009t,c1019t,n1042-1043,a1053g,g1067a,a1079g,c1129g,c1157t,c1190t,n1233,g1268a,t1292c;LP=8;RP=5;RA=0.678;PRIOR=false;SR=8;GENE=PLCH2;AF=0.000199681;AC=1	0.000199681	.	.	.	.	.	.
1	2648017	ALU	TSD=TTTTTTTTTTTT;ASSESS=5;INTERNAL=NM_001242672,INTRONIC;SVTYPE=ALU;SVLEN=279;MEINFO=AluY,1,280,+;DIFF=0.98:g5t,g9a,c20t,c53t,c57t,g58a,g79a,c92t,c98t,g110a,c138t,g143a,g175a,g196t,g199t,g207a,c213t,c218g,c230t,g231a,c236t,g269a,c276t,g277a;LP=43;RP=42;RA=0.034;PRIOR=false;SR=10;AF=0.00173611;AC=2	.	.	.	.	.	0.00173611	.
1	2781738	ALU	TSD=AAAAGGGTGCTGA;ASSESS=5;INTERNAL=TTC34,INTRONIC;SVTYPE=ALU;SVLEN=281;MEINFO=AluYb8,0,281,+;DIFF=1:c57t,c64t,c98a,t144c,g211a,c236t,c248g,i252gcagtcc,g253a,a252g;LP=10;RP=11;RA=-0.138;PRIOR=false;SR=12;AF=0.000150105;AC=1	.	.	.	0.000150105	.	.	.
1	2873067	ALU	TSD=null;ASSESS=3;INTERNAL=null,null;SVTYPE=ALU;SVLEN=279;MEINFO=AluSz,1,280,+;DIFF=0.74:g5a,c20t,c48t,c53t,g58a,t65g,c80a,g101a,i129a,g140a,g144a,c151t,c153t,g154a,c155t,c157t,c167t,c197t,t200a,c207t,g208a,c214t,g222t,g227a,c231t,g240a,c249t,d257-282;LP=332;RP=94;RA=1.82;PRIOR=false;SR=165;AF=0.0078125;AC=9	0.00119808	.	0.00044964	.	0.00793651	0.0078125	.
1	2957095	ALU	TSD=AAAGATCCAGGAAGG;ASSESS=5;INTERNAL=null,null;SVTYPE=ALU;SVLEN=281;MEINFO=AluYb8,0,281,+;DIFF=1:c57t,c64t,c98a,t144c,g211a,c230a,c236t,c248g,i252gcagtcc,g253a,a252g;LP=19;RP=18;RA=0.078;PRIOR=false;SR=8;AF=0.000199681;AC=1	0.000199681	.	.	.	.	.	.
1	3095323	ALU	TSD=AGAAAGTGGAGTA;ASSESS=5;INTERNAL=NM_022114,INTRONIC;SVTYPE=ALU;SVLEN=281;MEINFO=AluYa5,0,281,+;DIFF=1:t89c,c96a,g145a,c174t,c205t,g237c;LP=569;RP=486;RA=0.227;PRIOR=false;SR=401;AF=0.0250716;AC=35;GENE=PRDM16	0.0183706	0.0250716	.	0.0478835	0.00793651	0.00954861	.
1	3386879	ALU	TSD=TTTTTTTT;ASSESS=5;INTERNAL=PRDM16,INTRONIC;SVTYPE=ALU;SVLEN=281;MEINFO=AluYa5,0,281,-;DIFF=0.89:t89c,c96a,a119g,g145a,c174t,t219a,g237c;LP=4;RP=5;RA=-0.322;PRIOR=false;SR=3;AF=0.000150105;AC=1	.	.	.	0.000150105	.	.	.
1	3578784	ALU	TSD=null;ASSESS=3;INTERNAL=NM_001409,INTRONIC;SVTYPE=ALU;SVLEN=66;MEINFO=AluYb,215,281,+;DIFF=0.24:g211a,c236t,i252gcagtcc,c248g;LP=94;RP=133;RA=-0.501;PRIOR=false;SR=113;AF=0.0143266;AC=20;GENE=MEGF6	0.0091853	0.0143266	.	0.0174122	.	.	.
1	3578890	ALU	TSD=null;ASSESS=4;INTERNAL=NM_001409,INTRONIC;SVTYPE=ALU;SVLEN=66;MEINFO=AluY,215,281,+;DIFF=0.24:c53t,g58a,a76t,g79a,c84a,t86g,c98t,g110a,a132g,g139a,g151a,c154t,c236t,i252gcagtcc,c248g;LP=28;RP=25;RA=0.163;PRIOR=false;SR=26;AF=0.00173611;AC=2	.	.	.	.	.	0.00173611	.
1	3631885	ALU	TSD=null;ASSESS=3;INTERNAL=WRAP73,INTRONIC;SVTYPE=ALU;SVLEN=279;MEINFO=AluY,1,280,+;DIFF=0.96:c8t,c20t,g65a,c98t,g143a,g151a,c154t,g175a,g207a,g277a;LP=46;RP=53;RA=-0.204;PRIOR=false;SR=71;AF=0.000261949;AC=26	.	.	.	.	.	.	0.000261949
1	3631885	LINE1	TSD=null;ASSESS=3;INTERNAL=WRAP73,INTRONIC;SVTYPE=LINE1;SVLEN=2144;MEINFO=L1Ambig,3875,6019,-;DIFF=0.04:n1-1496,a1506t,a1507t,n1528,g1536a,n1556,n1564,n1573-1693,a1740g,n1770-1910,a1938t,n1987-2075,a2083c,n2088,a2118g,c2129t,g2135a,a2146g,n2151-2203,n2266-2269,n2284-2718,g2723a,c2725a,n2748,c2769a,t2770a,n2799,g2802c,g2830t,c2834t,c2835a,n2843,n2846-2847,n2855-2858,t2902c,n2930,n2933-3002,n3039-3…	.	.	.	.	.	.	0.000261949
1	3660918	SVA	TSD=null;ASSESS=3;INTERNAL=TP73,INTRONIC;SVTYPE=SVA;SVLEN=318;MEINFO=SVA,997,1315,+;DIFF=0.18:n1-996,g1009t,n1015,c1019t,a1053g,g1067a,g1071a,a1079g,t1100a,c1111a,g1118a,c1129g,g1134t,t1137a,c1138t,c1144a,c1157t,n1171-1173,g1268a,t1292c;LP=1;RP=6;RA=-2.585;PRIOR=false;SR=5;AF=0.000150105;AC=1	.	.	.	0.000150105	.	.	.
1	3737487	ALU	TSD=GAATATGGGCTTTTC;ASSESS=5;INTERNAL=NR_033708,3_UTR;SVTYPE=ALU;SVLEN=272;MEINFO=AluYa1_1,9,281,-;DIFF=1:g145a;LP=42;RP=33;RA=0.348;PRIOR=false;SR=40;AF=0.000399361;AC=2	0.000399361	.	.	.	.	.	.
1	3787560	ALU	TSD=AACAGTGATCTC;ASSESS=5;INTERNAL=NM_020710,INTRONIC;SVTYPE=ALU;SVLEN=281;MEINFO=AluYa4_5,0,281,+;DIFF=1:g11a,t89c,c96a,g145a,c174t,c236t;LP=12;RP=22;RA=-0.874;PRIOR=false;SR=16;AF=0.000716332;AC=1;GENE=LRRC47	0.00139776	0.000716332	.	0.000750525	.	0.000868056	.
1	3833356	ALU	TSD=CGTAATTCATAAGCTTCTT;ASSESS=5;INTERNAL=CEP104,INTRONIC;SVTYPE=ALU;SVLEN=281;MEINFO=AluYa4_5,0,281,-;DIFF=1:g54t,t89c,c96a,g145a,c174t,c236t;LP=17;RP=17;RA=0;PRIOR=false;SR=13;AF=0.000150105;AC=1	.	.	.	0.000150105	.	.	.
1	3836492	ALU	TSD=null;ASSESS=4;INTERNAL=NM_014704,INTRONIC;SVTYPE=ALU;SVLEN=279;MEINFO=AluY,1,280,-;DIFF=1:g5a,g11a,g25a,g49a,c53t,g58a,c64t,g75a,c98t,g143a,g153a,g237c,g261a;LP=105;RP=105;RA=0;PRIOR=false;SR=16;AF=0.000868056;AC=1	0.000199681	.	.	.	.	0.000868056	.
1	3938132	ALU	TSD=AAAAATTTCA;ASSESS=5;INTERNAL=NR_040065,PROMOTER;SVTYPE=ALU;SVLEN=265;MEINFO=AluYb,16,281,+;DIFF=1:c98a,t144c,g207a,g231a,g237a,c260t,c263a,g265c,c268t,g277a;LP=21;RP=29;RA=-0.466;PRIOR=false;SR=17;AF=0.000716332;AC=1	0.000199681	0.000716332	.	.	.	.	.
1	4011935	ALU	TSD=AAAATGCAT;ASSESS=5;INTERNAL=null,null;SVTYPE=ALU;SVLEN=166;MEINFO=AluY,115,281,+;DIFF=0.96:c4t,c10t,g21a,c47t,c57t,c64t,c98t,c150t;LP=27;RP=66;RA=-1.29;PRIOR=false;SR=45;AF=0.000798722;AC=4	0.000798722	.	.	.	.	.	.
1	4015918	ALU	TSD=AAAAGAAAAAGTTAA;ASSESS=5;INTERNAL=LINC01346,TERMINATOR;SVTYPE=ALU;SVLEN=281;MEINFO=AluYa3_4,0,281,+;DIFF=0.98:c4t,g11a,g21a,t29a,c53t,g58a,g145a,c174t,g237c;LP=12;RP=16;RA=-0.415;PRIOR=false;SR=12;AF=0.000150105;AC=1	.	.	.	0.000150105	.	.	.
1	4060134	LINE1	TSD=AAAAAAAAA;ASSESS=5;INTERNAL=null,null;SVTYPE=LINE1;SVLEN=399;MEINFO=L1Ambig,5619,6018,-;DIFF=0.02:n1-5618,t5636c,a5710g,a5712g,n5720-5763,a5771g,a5793g,t5850c,c5878g,g5881t,g5886c,n5903-6019;LP=7;RP=8;RA=-0.193;ISTP=0;PRIOR=false;SR=33;AF=0.150794;AC=19	.	.	0.0633993	0.0547884	0.150794	.	.
1	4228405	ALU	TSD=TTTTCTCACCCTTCT;ASSESS=5;INTERNAL=null,null;SVTYPE=ALU;SVLEN=281;MEINFO=AluYa5,0,281,-;DIFF=1:t89c,c96a,g145a,c174t,g237c;LP=2765;RP=2577;RA=0.102;PRIOR=false;SR=3145;AF=0.136103;AC=190	0.123003	0.136103	0.196493	0.222606	0.134921	0.133681	.
1	4299078	ALU	TSD=TGCATCTCCCTTCTT;ASSESS=5;INTERNAL=null,null;SVTYPE=ALU;SVLEN=126;MEINFO=AluYb,155,281,-;DIFF=0.45:g211a,c236t,i252gcagtcc,c248g,a252g;LP=29;RP=11;RA=1.399;PRIOR=false;SR=54;AF=0.002149;AC=3	0.00139776	0.002149	.	.	.	0.000868056	.
1	4312732	ALU	TSD=TTGAATTAATTTTT;ASSESS=5;INTERNAL=null,null;SVTYPE=ALU;SVLEN=280;MEINFO=AluYb8,1,281,-;DIFF=1:c57t,c64t,c98a,i119a,t144c,g211a,c236t,i252gcagtcc,c248t,c248g,a252g;LP=15;RP=8;RA=0.907;PRIOR=false;SR=19;AF=0.000199681;AC=1	0.000199681	.	.	.	.	.	.
1	4392504	ALU	TSD=CTGATTCCAAAGTTT;ASSESS=5;INTERNAL=null,null;SVTYPE=ALU;SVLEN=279;MEINFO=AluYb8,2,281,-;DIFF=1:c57t,c64t,c98a,i127aaa,t144c,g211a,c236t,i252gcagtcc,t256g,c248g,a252g;LP=8;RP=18;RA=-1.17;PRIOR=false;SR=8;AF=0.000868056;AC=1	.	.	.	.	.	0.000868056	.
1	4430104	ALU	TSD=null;ASSESS=3;INTERNAL=NR_027088,TERMINATOR;SVTYPE=ALU;SVLEN=279;MEINFO=AluY,1,280,-;DIFF=0.98:c22t,t93c,c98t,g139a,c174g,c198t,c260t,c276t;LP=42;RP=29;RA=0.534;PRIOR=false;SR=9;AF=0.00260417;AC=3	.	.	.	.	.	0.00260417	.
1	4457552	ALU	TSD=null;ASSESS=3;INTERNAL=null,null;SVTYPE=ALU;SVLEN=279;MEINFO=AluY,1,280,-;DIFF=1:c10t,c20t,g54a,c64t,g79a,c98t,c154t,g196c,g199t,g207a,g214a,g237a,g239a,c268t,g277a;LP=52;RP=53;RA=-0.027;PRIOR=false;SR=12;AF=0.000868056;AC=1	.	.	.	.	.	0.000868056	.
1	4471996	ALU	TSD=TTTCCTAGCCTTTT;ASSESS=5;INTERNAL=null,null;SVTYPE=ALU;SVLEN=280;MEINFO=AluYh7,1,281,-;DIFF=1:c48a,c64t,a97g,t111c,g152c,a161g,a167g,a234g;LP=821;RP=798;RA=0.041;PRIOR=false;SR=1006;AF=0.0372493;AC=52	0.0321486	0.0372493	.	0.115881	0.00793651	0.015625	.
1	4508932	LINE1	TSD=null;ASSESS=4;INTERNAL=null,null;SVTYPE=LINE1;SVLEN=2427;MEINFO=L1Ambig,3591,6018,-;DIFF=0.03:n1-5354,g5381a,c5391t,t5435g,c5494t,g5520a,n5527,n5529,n5531,t5535a,g5538t,n5545-5546,g5552a,g5573a,g5586a,c5622t,g5706a,t5707a,a5712g,c5715t,g5723a,a5736g,t5737c,t5751c,t5757c,t5762g,t5764a,g5766a,a5769g,a5775g,n5807,n5841,n5864,n5874,n5922,a5931g,n5932,n5934-5956,a5969c,t5978a,a5979g,n6014-6019;LP=…	0.000599042	.	0.0134892	0.0330827	.	.	.
1	4593533	ALU	TSD=AAGAGTTCTTG;ASSESS=5;INTERNAL=null,null;SVTYPE=ALU;SVLEN=113;MEINFO=AluYa,168,281,+;DIFF=0.41:c174t,g237c;LP=7;RP=10;RA=-0.515;PRIOR=false;SR=24;AF=0.000399361;AC=2	0.000399361	.	.	0.00060042	.	.	.
1	4606302	ALU	TSD=CTGTTTGGCTTCTTTGTTTTT;ASSESS=5;INTERNAL=null,null;SVTYPE=ALU;SVLEN=279;MEINFO=AluYb,2,281,-;DIFF=1:c57t,c98a,t134c,t144c,g211a,g214a,c236t,a252g;LP=24;RP=16;RA=0.585;PRIOR=false;SR=7;AF=0.000199681;AC=1	0.000199681	.	.	.	.	.	.
1	4772095	LINE1	TSD=null;ASSESS=3;INTERNAL=AJAP1,INTRONIC;SVTYPE=LINE1;SVLEN=3953;MEINFO=L1Ambig,2065,6018,+;DIFF=0.07:n1-5447,c5502t,n5524-5689,a5712g,n5743-5745,n5769-5827,n5845,g5885a,n5904-6019;LP=4;RP=9;RA=-1.17;ISTP=0;PRIOR=false;SR=3;AF=0.00813189;AC=730	.	.	.	.	.	.	0.00813189
1	4807656	ALU	TSD=AAAAAAAAAAAAAAAAAAAAAA;ASSESS=5;INTERNAL=AJAP1,TERMINATOR;SVTYPE=ALU;SVLEN=279;MEINFO=AluY,1,280,+;DIFF=0.81:c4t,c53t,g143a,c206t,g211a,c213t,g214a,c230t,a232t,a234c,g237a,c238t;LP=11;RP=16;RA=-0.541;PRIOR=false;SR=9;AF=0.00044964;AC=1	.	.	0.00044964	.	.	.	.
1	4807659	ALU	TSD=AAAAAAAAAAAAAAAAAAAAAAAAA;ASSESS=5;INTERNAL=null,null;SVTYPE=ALU;SVLEN=279;MEINFO=AluSz,1,280,+;DIFF=0.99:g58a,t65g,i129a,c139t,g144a,c151t,c153t,c155t,g198a,c206t,c207t,g213a,c214t,g238a,c239t,c244t,c269t,c277t;LP=25;RP=31;RA=-0.31;PRIOR=false;SR=40;AF=0.0885417;AC=102	.	.	.	.	.	0.0885417	.
1	4859286	ALU	TSD=TGGACTGTGGACTTTT;ASSESS=5;INTERNAL=null,null;SVTYPE=ALU;SVLEN=280;MEINFO=AluYa5,1,281,-;DIFF=1:t89c,c96a,g145a,c174t,g237c,i127a;LP=12;RP=20;RA=-0.737;PRIOR=false;SR=6;AF=0.000199681;AC=1	0.000199681	.	.	.	.	.	.
1	4864109	LINE1	TSD=TTTTTTTTTTTTTTTTTTTTTTT;ASSESS=5;INTERNAL=null,null;SVTYPE=LINE1;SVLEN=3580;MEINFO=L1Ambig,2438,6018,-;DIFF=0.03:n1-2437,c2565a,n2610-2675,a2701c,t2712a,t2714c,a2722g,n2726-2786,a2803g,a2964t,c2990a,g2999a,a3015g,a3036g,g3084t,n3092-6019;LP=34;RP=24;RA=0.503;ISTP=0;PRIOR=false;SR=14;AF=0.00868056;AC=10	.	.	.	.	.	0.00868056	.
1	4883767	ALU	TSD=CAAAGTAGTTCTTT;ASSESS=5;INTERNAL=AJAP1,TERMINATOR;SVTYPE=ALU;SVLEN=280;MEINFO=AluYb8,1,281,-;DIFF=1:c57t,c64t,c98a,t144c,g211a,c236t,i252gcagtcc,c248g,a252g;LP=15;RP=23;RA=-0.617;PRIOR=false;SR=18;AF=0.000150105;AC=1	.	.	.	0.000150105	.	.	.
1	4923880	ALU	TSD=AAATTATCCTCT;ASSESS=5;INTERNAL=null,null;SVTYPE=ALU;SVLEN=281;MEINFO=AluYc1,0,281,+;DIFF=1:g148a,c206t,c251t;LP=8;RP=15;RA=-0.907;PRIOR=false;SR=15;AF=0.000199681;AC=1	0.000199681	.	.	.	.	.	.
1	4954071	ALU	TSD=AAAAAGAAAACCT;ASSESS=5;INTERNAL=AJAP1,TERMINATOR;SVTYPE=ALU;SVLEN=281;MEINFO=AluYa4_5,0,281,+;DIFF=1:t89c,c96a,g145a,c174t,c236t;LP=11;RP=13;RA=-0.241;PRIOR=false;SR=15;AF=0.000150105;AC=1	.	.	.	0.000150105	.	.	.
1	4965829	ALU	TSD=AAGAAAAGGATA;ASSESS=5;INTERNAL=AJAP1,TERMINATOR;SVTYPE=ALU;SVLEN=281;MEINFO=AluYa5,0,281,+;DIFF=1:t89c,c96a,g145a,c174t,g237c;LP=11;RP=6;RA=0.874;PRIOR=false;SR=7;AF=0.000150105;AC=1	.	.	.	0.000150105	.	.	.
1	4987085	ALU	TSD=CCATCTCATTTTTTTT;ASSESS=5;INTERNAL=null,null;SVTYPE=ALU;SVLEN=279;MEINFO=AluYa4_5,2,281,-;DIFF=1:t89c,c96a,g145a,c174t;LP=41;RP=52;RA=-0.343;PRIOR=false;SR=43;AF=0.002149;AC=3	0.00539137	0.002149	.	0.0189132	.	0.00434028	.
1	5011406	ALU	TSD=null;ASSESS=3;INTERNAL=AJAP1,TERMINATOR;SVTYPE=ALU;SVLEN=279;MEINFO=AluY,1,280,+;DIFF=0.98:g11a,c20t,c48t,g55a,g58a,g65a,c78t,c98t,c137t,g141a,c142t,g151a,g155a,g196c,g197a,g199a,g201a,g207a,c213t,c218g,c230t,g237c,c268t,g277a;LP=1;RP=7;RA=-2.807;PRIOR=false;SR=1;AF=0.00405284;AC=27	.	.	.	0.00405284	.	.	.
1	5011440	ALU	TSD=null;ASSESS=4;INTERNAL=AJAP1,TERMINATOR;SVTYPE=ALU;SVLEN=279;MEINFO=AluY,1,280,-;DIFF=0.94:c8t,c10t,i65gt,t93c,c98t,g143a,g231a,g237a,c260t,g261t,g269a;LP=5;RP=7;RA=-0.485;PRIOR=false;SR=1;AF=0.000899281;AC=2	.	.	0.000899281	.	.	.	.
1	5015254	ALU	TSD=AAGAACAGCCTCTTCC;ASSESS=5;INTERNAL=AJAP1,TERMINATOR;SVTYPE=ALU;SVLEN=281;MEINFO=AluYb,0,281,+;DIFF=1:c57t,c64t,c98a,i119a,t144c,g175c,g237a,c238t,g269c;LP=14;RP=19;RA=-0.441;PRIOR=false;SR=18;AF=0.000150105;AC=1	.	.	.	0.000150105	.	.	.
1	5029990	ALU	TSD=CCTTGCCATTATTTTT;ASSESS=5;INTERNAL=null,null;SVTYPE=ALU;SVLEN=280;MEINFO=AluYa5,1,281,-;DIFF=1:a36g,t89c,c96a,g145a,c174t,g209c,g237c;LP=60;RP=55;RA=0.126;PRIOR=false;SR=63;AF=0.002149;AC=3	0.00239617	0.002149	.	0.00570399	0.00793651	0.000868056	.
1	5091191	ALU	TSD=AAAAGAAATAACTCTCAG;ASSESS=5;INTERNAL=null,null;SVTYPE=ALU;SVLEN=281;MEINFO=AluYa5,0,281,+;DIFF=0.99:t89c,c96a,g145a,c174t,g237c;LP=13;RP=6;RA=1.115;PRIOR=false;SR=10;AF=0.000868056;AC=1	.	.	.	.	.	0.000868056	.
1	5104221	ALU	TSD=null;ASSESS=3;INTERNAL=null,null;SVTYPE=ALU;SVLEN=279;MEINFO=AluY,1,280,-;DIFF=0.98:g11a,g54a,c98t,g199a,g207a,c238t,g239a,c248t,c254t,c255g,c260t,c268t,g269a,g271a,c276t;LP=28;RP=22;RA=0.348;PRIOR=false;SR=12;AF=0.00173611;AC=2	.	.	.	.	.	0.00173611	.
1	5117542	ALU	TSD=AGGGCCTTT;ASSESS=5;INTERNAL=null,null;SVTYPE=ALU;SVLEN=279;MEINFO=AluYc1,2,281,-;DIFF=1:i127aaa,g148a;LP=20;RP=23;RA=-0.202;PRIOR=false;SR=18;AF=0.000399361;AC=2	0.000399361	.	.	.	.	.	.
1	5134483	ALU	TSD=AATTCACCTGTT;ASSESS=5;INTERNAL=null,null;SVTYPE=ALU;SVLEN=279;MEINFO=AluYa3_4,1,280,+;DIFF=0.99:c98t,g110a,g145a,c174t,g237c;LP=27;RP=39;RA=-0.531;PRIOR=false;SR=10;AF=0.000199681;AC=1	0.000199681	.	.	.	.	.	.
1	5172654	LINE1	TSD=TCGGCCCCCTCCTTTCTA;ASSESS=5;INTERNAL=MIR4417,PROMOTER;SVTYPE=LINE1;SVLEN=-1;MEINFO=L1Ambig,-1,6019,-;DIFF=0.06:n1-3040,c3066g,t3174g,n3290-6019;LP=10;RP=13;RA=-0.379;ISTP=3252;PRIOR=false;SR=10;AF=0.000150105;AC=1	.	.	.	0.000150105	.	.	.
1	5228992	ALU	TSD=TTTTTTTTTT;ASSESS=5;INTERNAL=MIR4417,PROMOTER;SVTYPE=ALU;SVLEN=279;MEINFO=AluY,1,280,-;DIFF=0.98:g9a,c20a,g49a,g65a,c78t,t93c,g199t,g207a,c236t,c243t,c260t,d281;LP=8;RP=10;RA=-0.322;PRIOR=false;SR=8;AF=0.00944245;AC=21	.	.	0.00944245	.	.	.	.
1	5333372	LINE1	TSD=AAAAACACAA;ASSESS=5;INTERNAL=null,null;SVTYPE=LINE1;SVLEN=1129;MEINFO=L1Ambig,4890,6019,+;DIFF=0.08:n1-4889,c5109t,t5160c,a5180t,t5264a,n5310,n5328,n5376,n5395-5396,n5398,n5402-5403,n5406,n5409,n5419,n5429-5430,n5432-5433,n5436,n5439,n5442,n5444,t5449c,n5472,n5484,n5487-6019;LP=162;RP=12;RA=3.755;ISTP=0;PRIOR=false;SR=120;AF=0.00644699;AC=9	.	0.00644699	.	.	0.015873	.	.
1	5405345	ALU	TSD=TGCCCCCTGTCTT;ASSESS=5;INTERNAL=null,null;SVTYPE=ALU;SVLEN=280;MEINFO=AluYa5,1,281,-;DIFF=0.99:t89c,c96a,g145a,c174t,c218g,g237c,a272g,c276t,i127a;LP=8;RP=20;RA=-1.322;PRIOR=false;SR=14;AF=0.000868056;AC=1	.	.	.	.	.	0.000868056	.
1	5455876	ALU	TSD=AAGAAAAGGAAGCAGA;ASSESS=5;INTERNAL=MIR4417,PROMOTER;SVTYPE=ALU;SVLEN=281;MEINFO=AluYb8,0,281,+;DIFF=1:c57t,c64t,c98a,i127aaa,t144c,g211a,c236t,c248g,i252gcagtcc,g253a,a252g;LP=15;RP=16;RA=-0.093;PRIOR=false;SR=10;AF=0.000150105;AC=1	.	.	.	0.000150105	.	.	.
1	5534555	LINE1	TSD=dATTTAGTGGCTT;ASSESS=5;INTERNAL=MIR4417,PROMOTER;SVTYPE=LINE1;SVLEN=2050;MEINFO=L1Ambig,3969,6019,+;DIFF=0.06:n1-3968,a4107t,n4247-6019;LP=38;RP=16;RA=1.248;ISTP=0;PRIOR=false;SR=37;AF=0.000450315;AC=3	.	.	.	0.000450315	.	.	.
1	5674690	ALU	TSD=TTTTTTTTTTTTTTTTTTTTTTTTTTTTT;ASSESS=5;INTERNAL=null,null;SVTYPE=ALU;SVLEN=279;MEINFO=AluSc,1,280,+;DIFF=0.98:g5a,c8t,g11a,g15a,g54a,d65-66,g74a,t78a,c85a,g88t,i129a,c139a,c151t,g154t,g156a,c157t,t164c,c173a,g176a,i191aa,g193a,g198a,c207t,c231t,g240a,c277t,d282;LP=125;RP=182;RA=-0.542;PRIOR=false;SR=795;AF=0.0253594;AC=127	0.0253594	.	.	.	.	.	.
1	5726824	LINE1	TSD=null;ASSESS=3;INTERNAL=null,null;SVTYPE=LINE1;SVLEN=123;MEINFO=L1Ambig,5895,6018,-;DIFF=0.02:n1-5894,n5896,g5903a,g5923a,a5929g,c5930a,a5931g,g5935a,g5946a,c5981t,a5989t,n6014-6019;LP=40;RP=5;RA=3;ISTP=-1;PRIOR=false;SR=1;AF=0.00143266;AC=2	.	0.00143266	.	.	.	.	.
1	5763085	ALU	TSD=ATCTCTATGTCTTTT;ASSESS=5;INTERNAL=MIR4689,TERMINATOR;SVTYPE=ALU;SVLEN=280;MEINFO=AluYa4_5,1,281,-;DIFF=1:t89c,c96a,g145a,c174t;LP=11;RP=21;RA=-0.933;PRIOR=false;SR=18;AF=0.00030021;AC=2	.	.	.	0.00030021	.	.	.
1	5785200	ALU	TSD=AAAAAAAAAAAAAAAAAAAAAAA;ASSESS=5;INTERNAL=MIR4689,TERMINATOR;SVTYPE=ALU;SVLEN=279;MEINFO=AluY,1,280,+;DIFF=0.67:g9a,c10t,g21c,g25c,c37t,c48t,g52a,g54a,g58a,c83a,g99a,g110a,t118a,g143a,g148a,g151a,g152c,g153a,c154t,g175a,c187t,g196t,g197a,g199t,c206t,g214a,c218g,c230a,g237a,c268t,d281;LP=3;RP=7;RA=-1.222;PRIOR=false;SR=3;AF=0.0467626;AC=104	.	.	0.0467626	.	.	.	.
1	5825896	LINE1	TSD=AATAAAATAAAATAAAATAAAA;ASSESS=5;INTERNAL=null,null;SVTYPE=LINE1;SVLEN=460;MEINFO=L1Ambig,5558,6018,+;DIFF=0.04:n1-5557,g5567a,n5648,n5664,n5712,n5715-5716,c5744t,a5772g,n5781,a5793g,n5816,t5827a,c5830t,n5836,n5838,n5841,n5843,n5846,n5850,n5852-5853,n5855,n5866-5870,c5878g,g5881c,g5890a,g5903a,t5918c,g5923a,a5929g,c5930a,a5931g,g5935a,g5946a,a5989t,g6014a;LP=43;RP=142;RA=-1.723;ISTP=0;PRIOR=fa…	.	.	.	.	.	0.000868056	.
1	5869597	ALU	TSD=AAGAATTCTTT;ASSESS=5;INTERNAL=NR_111987,INTRONIC;SVTYPE=ALU;SVLEN=280;MEINFO=AluYa4_5,1,281,-;DIFF=1:t89c,c96a,g145a,c174t;LP=10;RP=9;RA=0.152;PRIOR=false;SR=19;AF=0.000199681;AC=1	0.000199681	.	.	.	.	.	.
1	5874241	ALU	TSD=AAAGAAAATTAGG;ASSESS=5;INTERNAL=NR_111987,INTRONIC;SVTYPE=ALU;SVLEN=244;MEINFO=AluYb8,37,281,+;DIFF=0.86:c57t,c64t,c98a,t144c,g211a,c230t,c236t,i252gcagtcc,c248g,a252g;LP=2859;RP=3560;RA=-0.316;PRIOR=false;SR=4043;AF=0.15616;AC=218;GENE=NPHP4	0.139976	0.15616	0.26304	0.206995	0.166667	0.240451	.
1	5928080	ALU	TSD=GAAACTGACATCTTT;ASSESS=5;INTERNAL=NPHP4,INTRONIC;SVTYPE=ALU;SVLEN=280;MEINFO=AluYb6_2,1,281,-;DIFF=1:c57t,c64t,c98a,t144c,g211a,c236t,g261a,a252g;LP=14;RP=33;RA=-1.237;PRIOR=false;SR=31;AF=0.000450315;AC=3	.	.	.	0.000450315	.	.	.
1	5936545	ALU	TSD=null;ASSESS=4;INTERNAL=NR_111987,INTRONIC;SVTYPE=ALU;SVLEN=275;MEINFO=AluSz,5,280,-;DIFF=0.94:c8t,c57t,t65g,c98t,c111t,i129n,c139t,g144a,c151t,g152a,c153g,a163g,g208a,c214t,c231t,g232a,g238a,g240a,g262a,c269t,g278a;LP=46;RP=71;RA=-0.626;PRIOR=false;SR=10;AF=0.00173611;AC=2	.	.	.	.	.	0.00173611	.
1	5990973	SVA	TSD=null;ASSESS=3;INTERNAL=NR_111987,INTRONIC;SVTYPE=SVA;SVLEN=1240;MEINFO=SVA,75,1315,+;DIFF=0.31:n1-1013,c1019t,a1053g,g1067a,a1079g,c1129g,c1157t,i1185aaggcc,g1268a,t1292c;LP=5;RP=12;RA=-1.263;PRIOR=false;SR=4;GENE=NPHP4;AF=0.000199681;AC=1	0.000199681	.	.	.	.	.	.
1	6046294	LINE1	TSD=null;ASSESS=4;INTERNAL=KCNAB2,INTRONIC;SVTYPE=LINE1;SVLEN=1982;MEINFO=L1Ambig,4036,6018,-;DIFF=0.04:n1-4620,c4646a,n4659,c4663a,t4680c,n4697-4760,t4819c,a4858g,n4865-6019;LP=1;RP=6;RA=-2.585;ISTP=0;PRIOR=false;SR=1;AF=1.00804e-05;AC=1	.	.	.	.	.	.	1.00804e-05
1	6189628	ALU	TSD=AAAAAAAAAAAAAAAA;ASSESS=5;INTERNAL=RPL22,INTRONIC;SVTYPE=ALU;SVLEN=279;MEINFO=AluSg,1,280,-;DIFF=0.57:d65-66,g112a,t135a,g137a,c139t,c153g,g154a,c175t,c197g,t200a,c207t,g219c,c237g,c239t,g262a,g270a;LP=9;RP=4;RA=1.17;PRIOR=false;SR=24;AF=0.0532873;AC=355	.	.	.	0.0532873	.	.	.
1	6220809	SVA	TSD=AAAAAGTAACCCACGTG;ASSESS=5;INTERNAL=NM_207396,3_UTR;SVTYPE=SVA;SVLEN=761;MEINFO=SVA,555,1316,+;DIFF=0.42:n1-471,g477c,c485t,a487c,c508t,a513g,a561c,t564c,a578g,t580c,t582c,a607g,n652-696,n698,g702c,c710t,t729c,c733t,g764c,a773g,g840c,t847g,t862c,n880-927,g938a,c945a,t970c,t985c,g1009t,a1053g,g1067a,a1079g,g1082a,c1129g,c1146a,c1163a,c1164t,a1193g,t1267c,g1268a,g1310t;LP=34;RP=28;RA=0.28;PRIOR…	0.000399361	0.00143266	.	0.00195137	.	.	.
1	6238675	ALU	TSD=TAAAAATCAAAGTC;ASSESS=5;INTERNAL=LINC00337,5_UTR;SVTYPE=ALU;SVLEN=281;MEINFO=AluYb6_2,0,281,+;DIFF=1:c57t,c64t,c98a,t144c,c174g,i201t,g211a,c236t,c248g;LP=14;RP=6;RA=1.222;PRIOR=false;SR=15;AF=0.000150105;AC=1	.	.	.	0.000150105	.	.	.
1	6303478	ALU	TSD=AAAAATAAGGCTTCA;ASSESS=5;INTERNAL=NM_007274,INTRONIC;SVTYPE=ALU;SVLEN=281;MEINFO=AluY,0,281,+;DIFF=1:i127aa;LP=48;RP=59;RA=-0.298;PRIOR=false;SR=76;AF=0.000798722;AC=4	0.000798722	.	.	0.00540378	.	.	.
1	6323770	ALU	TSD=ATATATATATATATATATATATA;ASSESS=5;INTERNAL=ACOT7,INTRONIC;SVTYPE=ALU;SVLEN=279;MEINFO=AluY,1,280,-;DIFF=0.94:c4g,g9a,c10t,g11a,c20t,g21a,g49a,c53t,c57t,g58a,g139a,g151a,g196c,g199t,g207a,c218g,c236t,g239a,g265c,g277a;LP=9;RP=1;RA=3.17;PRIOR=false;SR=3;AF=0.0090063;AC=60	.	.	.	0.0090063	.	.	.
1	6338000	SVA	TSD=null;ASSESS=3;INTERNAL=NM_007274,INTRONIC;SVTYPE=SVA;SVLEN=1240;MEINFO=SVA,75,1315,+;DIFF=0.31:n1-488,n490,c499a,n503,c504t,g505a,g509a,a513g,g533a,n543-543,n558,a561c,t564c,c569t,n574,a578g,t580c,t582c,c586g,g593a,a594t,n597,n615,n619,n626-627,n630,g632a,n635,n638-880,a886g,g898a,t922g,a931g,a934t,g938a,n945,g1009t,c1019t,a1053g,g1067a,a1079g,c1129g,c1157t,g1268a;LP=3;RP=18;RA=-2.585;PRIOR=f…	0.000599042	0.00143266	.	.	.	.	.
1	6380713	ALU	TSD=null;ASSESS=3;INTERNAL=ACOT7,INTRONIC;SVTYPE=ALU;SVLEN=279;MEINFO=AluSc,1,280,+;DIFF=0.75:c20t,c48t,c57a,d65-66,t78a,g81a,g88t,i129a,g137t,c139t,g152a,c153g,c155t,g156a,c158t,g160c,g169t,c182t,g198a,c207t,g215a,t220g,g262a,g270a;LP=7;RP=7;RA=0;PRIOR=false;SR=8;AF=0.00345242;AC=23	.	.	.	0.00345242	.	.	.
1	6380728	ALU	TSD=AAAAAAAAAAAAAAA;ASSESS=5;INTERNAL=NM_007274,INTRONIC;SVTYPE=ALU;SVLEN=279;MEINFO=AluY,1,280,-;DIFF=0.95:g5a,g11a,g54a,c57t,g199t,g207a,c218g,c230t,g277a;LP=25;RP=37;RA=-0.566;PRIOR=false;SR=71;AF=0.149306;AC=172	.	.	.	.	.	0.149306	.
1	6399528	ALU	TSD=null;ASSESS=1;INTERNAL=ACOT7,PROMOTER;SVTYPE=ALU;SVLEN=279;MEINFO=AluY,1,280,-;DIFF=0.6:g9a,g11a,g15a,g21a,g42a,c48t,g54a,c57t,g58a,g67c,a76t,c114t,g151t,g153a,g162a,g196c,g199t,c205t,g207a,g208a,c222t,g237a,g261a,c268t,c276t;LP=7;RP=1;RA=2.807;PRIOR=false;SR=0;AF=0.00360252;AC=24	.	.	.	0.00360252	.	.	.
1	6524271	SVA	TSD=null;ASSESS=3;INTERNAL=NOL9,3_UTR;SVTYPE=SVA;SVLEN=201;MEINFO=SVA,1114,1315,+;DIFF=0.15:n1-1113,c1129g,c1157t,g1268a,t1292c;LP=1;RP=9;RA=-3.17;PRIOR=false;SR=2;AF=0.000150105;AC=1	.	.	.	0.000150105	.	.	.
1	6579755	ALU	TSD=AAAGAAGTGAAATGCG;ASSESS=5;INTERNAL=NM_138697,3_UTR;SVTYPE=ALU;SVLEN=280;MEINFO=AluYb8,1,281,+;DIFF=1:c57t,c64t,c98a,t144c,g211a,c236t,i252gcagtcc,c248g,a252g;LP=28;RP=36;RA=-0.363;PRIOR=false;SR=44;AF=0.000399361;AC=2	0.000399361	.	.	.	.	.	.
1	6640089	ALU	TSD=AAAAAAAAAAAAAAAAAA;ASSESS=5;INTERNAL=DNAJC11,INTRONIC;SVTYPE=ALU;SVLEN=279;MEINFO=AluYb,1,280,-;DIFF=0.64:c4t,g5a,g9a,g12a,c16t,g49a,g52a,c53t,c57t,c142t,g196c,g197a,g199t,c206t,c218g,c222t,a223g,g231a;LP=9;RP=8;RA=0.17;PRIOR=false;SR=59;AF=0.0325879;AC=3235	.	.	.	.	.	.	0.0325879
1	6662147	ALU	TSD=TTTTTTGTTTTTTGTTTTTTTTTTTT;ASSESS=5;INTERNAL=NM_018198,INTRONIC;SVTYPE=ALU;SVLEN=245;MEINFO=AluSz,35,280,-;DIFF=0.76:g43a,g51a,c53t,g56a,g58a,g59c,d64-65,c80t,g93a,g112a,i129n,c143t,c197g;LP=29;RP=41;RA=-0.5;PRIOR=false;SR=8;AF=0.00954861;AC=11	.	.	.	.	.	0.00954861	.
1	6675303	ALU	TSD=AAAAAAAAAAAAAA;ASSESS=5;INTERNAL=NM_018198,INTRONIC;SVTYPE=ALU;SVLEN=279;MEINFO=AluY,1,280,+;DIFF=1:c57t,i65gt,g143a,c150t,g155a,g196c,g199t,c218g,g237a,c238t,c260t,g269a,c276t;LP=30;RP=37;RA=-0.303;PRIOR=false;SR=10;AF=0.0078125;AC=9	.	.	.	.	.	0.0078125	.
1	6691204	ALU	TSD=AAAAAAAAAAAAAAAA;ASSESS=5;INTERNAL=NM_018198,INTRONIC;SVTYPE=ALU;SVLEN=279;MEINFO=AluY,1,280,+;DIFF=0.63:g54a,c98t,g139a,c150t,c198t,c213t;LP=97;RP=89;RA=0.124;PRIOR=false;SR=54;AF=0.0138889;AC=16	.	.	.	.	.	0.0138889	.
1	6698220	ALU	TSD=AAGGTACTTTGA;ASSESS=5;INTERNAL=NM_018198,INTRONIC;SVTYPE=ALU;SVLEN=281;MEINFO=AluYc1,0,281,+;DIFF=0.99:g148a,c206t;LP=66;RP=119;RA=-0.85;PRIOR=false;SR=95;AF=0.00429799;AC=6;GENE=DNAJC11	0.00279553	0.00429799	.	0.00795557	.	0.000868056	.
1	6708991	ALU	TSD=null;ASSESS=4;INTERNAL=DNAJC11,PROMOTER;SVTYPE=ALU;SVLEN=279;MEINFO=AluY,1,280,+;DIFF=0.83:g5a,g11a,c18t,c20t,c48t,g58a,g65c,c154t,g162a,g175a,g196c,g199t,g207a,c213t,c218g,g269a,c276t;LP=14;RP=28;RA=-1;PRIOR=false;SR=6;AF=0.000450315;AC=3	.	.	.	0.000450315	.	.	.
1	6746481	ALU	TSD=GGATCTTAGTTTT;ASSESS=5;INTERNAL=LINC01672,TERMINATOR;SVTYPE=ALU;SVLEN=260;MEINFO=AluYa4_2,21,281,-;DIFF=0.99:g5a,c10t,g11t,t89c,a94g,c96a,g145a,g237c;LP=8;RP=9;RA=-0.17;PRIOR=false;SR=9;AF=0.000150105;AC=1	.	.	.	0.000150105	.	.	.
1	6754758	ALU	TSD=AAAAAGGAAAAACAA;ASSESS=5;INTERNAL=null,null;SVTYPE=ALU;SVLEN=262;MEINFO=AluYb8,19,281,+;DIFF=0.93:c57t,c64t,c98a,t144c,g211a,c236t,c248g,i252gcagtcc,g253a,a252g;LP=431;RP=548;RA=-0.346;PRIOR=false;SR=549;AF=0.0265043;AC=37	0.0207668	0.0265043	0.0984712	0.00630441	0.0396825	0.0234375	.
1	6789207	ALU	TSD=AAAAGAGTAG;ASSESS=5;INTERNAL=NM_015215,INTRONIC;SVTYPE=ALU;SVLEN=280;MEINFO=AluYb8,1,281,+;DIFF=1:c57t,c64t,c98a,t144c,g211a,c236t,c248g,i252gcagtcc,g253a,a252g;LP=189;RP=192;RA=-0.023;PRIOR=false;SR=220;AF=0.00931232;AC=13;GENE=CAMTA1	0.00599042	0.00931232	.	0.0165116	0.00793651	.	.
1	6791951	ALU	TSD=TTGTCATGCATTT;ASSESS=5;INTERNAL=NM_015215,INTRONIC;SVTYPE=ALU;SVLEN=247;MEINFO=AluY,34,281,-;DIFF=0.96:c20t,c57t,a76t,c98t,g143a,c236t,c276t;LP=32;RP=60;RA=-0.907;PRIOR=false;SR=13;AF=0.000199681;AC=1	0.000199681	.	.	.	.	.	.
1	6795188	ALU	TSD=TAAAACTTATTTT;ASSESS=5;INTERNAL=CAMTA1,INTRONIC;SVTYPE=ALU;SVLEN=280;MEINFO=AluYb8,1,281,-;DIFF=1:c57t,c64t,c98a,i127aaaa,t144c,g211a,c236t,c248g,i252gcagtcc,g253a,a252g;LP=13;RP=3;RA=2.115;PRIOR=false;SR=12;AF=0.00060042;AC=4	.	.	.	0.00060042	.	.	.
1	6874693	ALU	TSD=TGGGTTTTTAATCTCTT;ASSESS=5;INTERNAL=NM_015215,INTRONIC;SVTYPE=ALU;SVLEN=244;MEINFO=AluYa1_1,37,281,-;DIFF=0.95:c4t,c10t,g145a;LP=23;RP=15;RA=0.617;PRIOR=false;SR=17;AF=0.000716332;AC=1;GENE=CAMTA1	0.000199681	0.000716332	.	.	.	.	.
1	6875850	ALU	TSD=AGAAATACAGGAAGTTT;ASSESS=5;INTERNAL=CAMTA1,INTRONIC;SVTYPE=ALU;SVLEN=241;MEINFO=AluYb8,40,281,+;DIFF=0.84:c20t,g49a,g54a,c57t,c64t,g65a,g72a,c98a,t144c,g211a,c236t,c248g,i252gcagtcc,g253a,a252g;LP=10;RP=4;RA=1.322;PRIOR=false;SR=9;AF=0.000150105;AC=1	.	.	.	0.000150105	.	.	.
1	6887483	ALU	TSD=null;ASSESS=3;INTERNAL=CAMTA1,INTRONIC;SVTYPE=ALU;SVLEN=273;MEINFO=AluY,7,280,+;DIFF=0.74:c10t,c48t,g52a,g54a,g65a,a97g,c98t,c109t,g151a,c204t,a210t,c230t,c260t,c268t,c276t;LP=10;RP=3;RA=1.737;PRIOR=false;SR=1;AF=5.0711e-05;AC=5	.	.	.	.	.	.	5.0711e-05
1	6892609	ALU	TSD=null;ASSESS=4;INTERNAL=CAMTA1,INTRONIC;SVTYPE=ALU;SVLEN=279;MEINFO=AluY,1,280,-;DIFF=0.96:c57t,a76t,t86g,t93c,c98t,c138a,g162a,c198t,g265a,g269a;LP=9;RP=8;RA=0.17;PRIOR=false;SR=1;AF=0.000450315;AC=3	.	.	.	0.000450315	.	.	.
1	6920283	ALU	TSD=GGCAGTCAAATTTT;ASSESS=5;INTERNAL=NM_015215,INTRONIC;SVTYPE=ALU;SVLEN=281;MEINFO=AluYb8,0,281,-;DIFF=1:c57t,c64t,c98a,t144c,g211a,c236t,c248g,i252gcagtcc,g253a,a252g;LP=13;RP=5;RA=1.379;PRIOR=false;SR=14;AF=0.000716332;AC=1;GENE=CAMTA1	0.000199681	0.000716332	.	.	.	.	.
1	6995319	SVA	TSD=null;ASSESS=4;INTERNAL=CAMTA1,INTRONIC;SVTYPE=SVA;SVLEN=1235;MEINFO=SVA,80,1315,-;DIFF=0:n1-84,n90,n93-95,n99,n101,n103-105,g110a,n111,n113-115,n117-119,n121,n123-126,g127c,n130-130,n133-1316;LP=1;RP=3;RA=-1.585;PRIOR=false;SR=1;AF=0.0722005;AC=481	.	.	.	0.0722005	.	.	.
1	7071527	ALU	TSD=AAAAATAAACGGACTA;ASSESS=5;INTERNAL=NM_015215,INTRONIC;SVTYPE=ALU;SVLEN=81;MEINFO=AluYb,200,281,+;DIFF=0.29:g211a,c236t,g237c,g267c;LP=5;RP=10;RA=-1;PRIOR=false;SR=10;AF=0.000716332;AC=1;GENE=CAMTA1	.	0.000716332	.	.	.	.	.
1	7078524	ALU	TSD=TGACACCCTCAAAGTTTT;ASSESS=5;INTERNAL=NM_015215,INTRONIC;SVTYPE=ALU;SVLEN=149;MEINFO=AluYa,132,281,-;DIFF=0.54:g145a,c174t,c236t;LP=5;RP=5;RA=0;PRIOR=false;SR=16;AF=0.000716332;AC=1;GENE=CAMTA1	0.000199681	0.000716332	.	0.000150105	.	.	.
1	7127270	ALU	TSD=null;ASSESS=4;INTERNAL=NM_015215,INTRONIC;SVTYPE=ALU;SVLEN=279;MEINFO=AluY,1,280,-;DIFF=0.93:c4t,c10t,g15a,c37t,t40a,c48t,c53t,g54a,c57t,c64t,g72a,t93c,g99a,g139a,c150t,g151a,g196c,g199t,c206t,c218g,c230t,g269a,c276t;LP=56;RP=39;RA=0.522;PRIOR=false;SR=7;AF=0.00954861;AC=11	.	.	.	0.0115581	.	0.00954861	.
1	7131538	ALU	TSD=TTTTTTTTTTTTTTTT;ASSESS=5;INTERNAL=NM_015215,INTRONIC;SVTYPE=ALU;SVLEN=279;MEINFO=AluY,1,280,-;DIFF=1:g5a,c53t,g54a,c57t,g58a,t93c,c98t,g139a,g151a,g199t,g207a,c218g,g269a,c276t;LP=50;RP=67;RA=-0.422;PRIOR=false;SR=13;AF=0.00954861;AC=11	.	.	.	.	.	0.00954861	.
1	7131538	SVA	TSD=TTTTTTTTTTTTTTTT;ASSESS=5;INTERNAL=CAMTA1,INTRONIC;SVTYPE=SVA;SVLEN=168;MEINFO=SVA,1147,1315,-;DIFF=0.12:n1-1146,c1163a,c1164t,g1184a,t1267c,g1268a,g1310t;LP=4;RP=1;RA=2;PRIOR=false;SR=4;AF=0.00090063;AC=6	.	.	.	0.00090063	.	.	.
1	7132528	LINE1	TSD=null;ASSESS=3;INTERNAL=NM_015215,INTRONIC;SVTYPE=LINE1;SVLEN=4629;MEINFO=L1Ambig,1390,6019,+;DIFF=0.05:n1-1390,a1656g,t1661c,n1762-6019;LP=11;RP=1;RA=3.459;ISTP=0;PRIOR=false;SR=6;GENE=CAMTA1;AF=0.000199681;AC=1	0.000199681	.	.	.	.	.	.
1	7141348	ALU	TSD=TCTTACTATAGCTTTCT;ASSESS=5;INTERNAL=CAMTA1,INTRONIC;SVTYPE=ALU;SVLEN=280;MEINFO=AluYa5,1,281,-;DIFF=1:t89c,g90a,c96a,g145a,c174t,g237c;LP=7;RP=6;RA=0.222;PRIOR=false;SR=13;AF=0.000150105;AC=1	.	.	.	0.000150105	.	.	.
1	7181984	ALU	TSD=AAAACAGTA;ASSESS=5;INTERNAL=NM_015215,INTRONIC;SVTYPE=ALU;SVLEN=281;MEINFO=AluYa5,0,281,+;DIFF=1:t89c,c96a,g145a,c174t,c206t,g237c;LP=727;RP=830;RA=-0.191;PRIOR=false;SR=812;AF=0.0429799;AC=60;GENE=CAMTA1	0.0311502	0.0429799	.	0.117682	0.015873	0.0130208	.
1	7203506	ALU	TSD=null;ASSESS=4;INTERNAL=CAMTA1,INTRONIC;SVTYPE=ALU;SVLEN=279;MEINFO=AluY,1,280,-;DIFF=0.77:c8t,g11a,g46t,g49a,g58a,c64t,g81t,c87g,c92t,g110a,t133a,g143a,c181t,g237a;LP=120;RP=19;RA=2.659;PRIOR=false;SR=15;AF=0.00030021;AC=2	.	.	.	0.00030021	.	.	.
1	7205921	ALU	TSD=CTGGACTTAATTTTTT;ASSESS=5;INTERNAL=NM_015215,INTRONIC;SVTYPE=ALU;SVLEN=279;MEINFO=AluYb8,2,281,-;DIFF=0.98:c57t,c64t,c98a,t144c,g211a,c236t,c248g,i252gcagtcc,g253a,d279-281,a252g;LP=10;RP=25;RA=-1.322;PRIOR=false;SR=12;GENE=CAMTA1;AF=0.00793651;AC=1	.	.	.	.	0.00793651	.	.
1	7212480	ALU	TSD=TCTCCTTTTTTTCTT;ASSESS=5;INTERNAL=NM_015215,INTRONIC;SVTYPE=ALU;SVLEN=280;MEINFO=AluYa5,1,281,-;DIFF=1:t89c,g90a,c96a,g145a,c174t,g237c;LP=13;RP=13;RA=0;PRIOR=false;SR=16;AF=0.000716332;AC=1;GENE=CAMTA1	0.00279553	0.000716332	.	0.00030021	.	.	.
1	7260508	ALU	TSD=AAAAGCTCAGGGCA;ASSESS=5;INTERNAL=CAMTA1,INTRONIC;SVTYPE=ALU;SVLEN=281;MEINFO=AluYa5,0,281,+;DIFF=1:t40c,t89c,c96a,g145a,c174t,g237c;LP=21;RP=20;RA=0.07;PRIOR=false;SR=19;AF=0.00030021;AC=2	.	.	.	0.00030021	.	.	.
1	7264578	ALU	TSD=AAGAAAACAATAGGAGA;ASSESS=5;INTERNAL=NM_015215,INTRONIC;SVTYPE=ALU;SVLEN=280;MEINFO=AluYg,1,281,+;DIFF=1:g52a,g143a,g152c,c154t,t173a,g175a,c229t;LP=35;RP=33;RA=0.085;PRIOR=false;SR=28;AF=0.002149;AC=3;GENE=CAMTA1	0.00159744	0.002149	.	0.00405284	.	.	.
1	7310681	ALU	TSD=dCTCTCTCTCTCTCTCTCTC;ASSESS=5;INTERNAL=NM_015215,INTRONIC;SVTYPE=ALU;SVLEN=271;MEINFO=AluSz,9,280,+;DIFF=0.96:g21a,c48t,g54a,c57t,t65g,c80t,g112a,i129a,c139t,g152a,c153g,c197g;LP=20;RP=55;RA=-1.459;PRIOR=false;SR=80;AF=0.0165735;AC=83	0.0165735	.	0.00944245	.	.	.	.
1	7426192	ALU	TSD=AAAAAGGTGAGGG;ASSESS=5;INTERNAL=NM_015215,INTRONIC;SVTYPE=ALU;SVLEN=268;MEINFO=AluYa,13,281,+;DIFF=0.95:t89c,c96a,i127aa,g145a,c174t,g207a,g209c,g237c;LP=431;RP=491;RA=-0.188;PRIOR=false;SR=456;AF=0.02149;AC=30;GENE=CAMTA1	0.0163738	0.02149	.	0.0633443	0.00793651	0.00520833	.
1	7442216	LINE1	TSD=null;ASSESS=4;INTERNAL=NM_015215,INTRONIC;SVTYPE=LINE1;SVLEN=3280;MEINFO=L1Ambig,2739,6019,+;DIFF=0.03:n1-2555,c2565a,n2609,t2625a,a2666g,a2707c,t2712a,g2723a,c2725t,g2782a,n2799-6019;LP=8;RP=1;RA=3;ISTP=-1;PRIOR=false;SR=3;GENE=CAMTA1;AF=0.000199681;AC=1	0.000199681	.	.	.	.	.	.
1	7575882	ALU	TSD=CTCAGTGATTTCT;ASSESS=5;INTERNAL=CAMTA1,INTRONIC;SVTYPE=ALU;SVLEN=280;MEINFO=AluYa4_3,1,281,-;DIFF=1:c16t,c20t,t89c,c96a,t124a,i126aaaaaaatac,c126a,c174t,g237c;LP=37;RP=34;RA=0.122;PRIOR=false;SR=30;AF=0.00030021;AC=2	.	.	.	0.00030021	.	.	.
1	7614405	ALU	TSD=AAAAAGGA;ASSESS=5;INTERNAL=NM_015215,INTRONIC;SVTYPE=ALU;SVLEN=263;MEINFO=AluYb7_4,18,281,+;DIFF=0.94:c57t,c64t,c98a,t144c,g199c,c236t,i252gcagtcc,c248g,a252g;LP=169;RP=181;RA=-0.099;PRIOR=false;SR=181;AF=0.00931232;AC=13;GENE=CAMTA1	0.00459265	0.00931232	.	0.0136596	.	0.00173611	.
1	7718869	ALU	TSD=TTTTTTTTTTTTTTTT;ASSESS=5;INTERNAL=NM_015215,INTRONIC;SVTYPE=ALU;SVLEN=269;MEINFO=AluSg,11,280,+;DIFF=0.95:g54a,c57t,d65-66,g67a,t78a,i129a,c139t,c143t,g149a,c151t,c153t,c155t,c207t,g232a,c237t,g240a,c264t,g266c,c269t,c277t;LP=32;RP=52;RA=-0.7;PRIOR=false;SR=57;AF=0.0269097;AC=31	.	.	0.0022482	0.00270189	.	0.0269097	.
1	7743762	ALU	TSD=AAGAATCAGTCCA;ASSESS=5;INTERNAL=NM_015215,INTRONIC;SVTYPE=ALU;SVLEN=281;MEINFO=AluYa4_3,0,281,+;DIFF=1:t89c,c96a,c98t,c109t,c174t,c218g,g237c,a247g;LP=79;RP=48;RA=0.719;PRIOR=false;SR=34;AF=0.000399361;AC=2	0.000399361	.	0.0022482	0.000150105	.	.	.
1	7760497	ALU	TSD=GAGGCATAGTTTCT;ASSESS=5;INTERNAL=NM_015215,INTRONIC;SVTYPE=ALU;SVLEN=280;MEINFO=AluYa5,1,281,-;DIFF=1:t89c,c96a,c108t,g145a,c174t,g237c;LP=10;RP=9;RA=0.152;PRIOR=false;SR=8;AF=0.000199681;AC=1	0.000199681	.	.	.	.	.	.
1	7903130	ALU	TSD=null;ASSESS=4;INTERNAL=TNFRSF9,TERMINATOR;SVTYPE=ALU;SVLEN=139;MEINFO=AluY,142,281,-;DIFF=0.9:c4t,c98t,g155a,c174t,g207a,g214a,c218t,c230t,g237a,c243t,g261a,g265a,g277a;LP=12;RP=11;RA=0.126;PRIOR=false;SR=5;AF=0.046313;AC=103	.	.	0.046313	.	.	.	.
1	7906510	ALU	TSD=null;ASSESS=4;INTERNAL=TNFRSF9,TERMINATOR;SVTYPE=ALU;SVLEN=279;MEINFO=AluY,1,280,-;DIFF=0.99:g5t,g9a,g143a,g155a,c174t,g175a,c206t,c213t,c218g,c238t,g261a,c268t;LP=5;RP=11;RA=-1.138;PRIOR=false;SR=11;AF=0.00044964;AC=1	.	.	0.00044964	.	.	.	.
1	7913587	ALU	TSD=null;ASSESS=3;INTERNAL=NM_001561,TERMINATOR;SVTYPE=ALU;SVLEN=279;MEINFO=AluY,1,280,-;DIFF=0.95:c8t,g11c,c20a,c53t,g65a,c98t,g155a,c260t,g261a,c268a,g269a,c276t;LP=71;RP=76;RA=-0.098;PRIOR=false;SR=36;AF=0.00347222;AC=4	.	.	.	.	.	0.00347222	.
1	7927062	ALU	TSD=null;ASSESS=3;INTERNAL=NM_001561,INTRONIC;SVTYPE=ALU;SVLEN=279;MEINFO=AluSg,1,280,+;DIFF=0.98:g9a,g21a,c57a,d65-66,g81a,i129a,g144a,g152a,c153g,c155t,c175t,c197g,c214t,g272a;LP=75;RP=68;RA=0.141;PRIOR=false;SR=5;AF=0.000868056;AC=1	.	.	.	.	.	0.000868056	.
1	7938449	ALU	TSD=TGTTCCCAGTAATTTT;ASSESS=5;INTERNAL=TNFRSF9,INTRONIC;SVTYPE=ALU;SVLEN=280;MEINFO=AluYa5,1,281,-;DIFF=1:t89c,c96a,c98t,g145a,c174t,g237c;LP=14;RP=9;RA=0.637;PRIOR=false;SR=13;AF=0.000150105;AC=1	.	.	.	0.000150105	.	.	.
1	7969426	LINE1	TSD=null;ASSESS=1;INTERNAL=PARK7,INTRONIC;SVTYPE=LINE1;SVLEN=2322;MEINFO=L1Ambig,3696,6018,-;DIFF=0.03:n1-5780,n5857-6019;LP=4;RP=3;RA=0.415;ISTP=-1;PRIOR=false;SR=0;AF=4.02941e-05;AC=4	.	.	.	.	.	.	4.02941e-05
1	7983790	ALU	TSD=TAAAGCAGGGGACAGG;ASSESS=5;INTERNAL=NM_007262,INTRONIC;SVTYPE=ALU;SVLEN=280;MEINFO=AluYa4_2,1,281,+;DIFF=1:t89c,c96a,i119a,c138t,g145a,g237c;LP=16;RP=9;RA=0.83;PRIOR=false;SR=11;AF=0.000199681;AC=1	0.000199681	.	.	.	.	.	.
1	7997595	SVA	TSD=TTT;ASSESS=5;INTERNAL=null,null;SVTYPE=SVA;SVLEN=387;MEINFO=SVA,929,1316,-;DIFF=0.29:n1-928,g938a,c945a,t970c,t985c,g1009t,a1053g,g1067a,a1079g,c1129g,c1146a,c1163a,c1164t,t1267c,g1268a,a1297t,g1310t;LP=22;RP=14;RA=0.652;PRIOR=false;SR=29;AF=0.000199681;AC=1	0.000199681	.	.	.	.	.	.
1	8023060	ALU	TSD=GAGTAGGTGACTTTT;ASSESS=5;INTERNAL=ERRFI1,INTRONIC;SVTYPE=ALU;SVLEN=269;MEINFO=AluYb3a1,12,281,-;DIFF=0.96:c57t,c64t,a74g,c98g,t144c,g211a,a223g,c236t,i252gcagtcc,c260t,c248g,a252g;LP=21;RP=24;RA=-0.193;PRIOR=false;SR=33;AF=0.00030021;AC=2	.	.	.	0.00030021	.	.	.
1	8150675	ALU	TSD=AAAAAAAAAAAAAAAAGAAAAAAAA;ASSESS=5;INTERNAL=LINC01714,PROMOTER;SVTYPE=ALU;SVLEN=279;MEINFO=AluY,1,280,-;DIFF=0.98:c10t,c57a,g58a,i65gt,c98t,g143a,g151a,g196c,g199t,c218g,c230t;LP=13;RP=14;RA=-0.107;PRIOR=false;SR=23;AF=0.046313;AC=103	.	.	0.046313	.	.	.	.
1	8155574	ALU	TSD=AAAAAGTGTT;ASSESS=5;INTERNAL=null,null;SVTYPE=ALU;SVLEN=270;MEINFO=AluYa5,11,281,+;DIFF=0.99:g9a,g11a,t89c,c96a,c98t,g145a,c174t,g237c;LP=16;RP=11;RA=0.541;PRIOR=false;SR=7;AF=0.000199681;AC=1	0.000199681	.	.	0.00060042	.	.	.
1	8216986	ALU	TSD=null;ASSESS=3;INTERNAL=NR_125998,TERMINATOR;SVTYPE=ALU;SVLEN=57;MEINFO=AluJo,223,280,-;DIFF=0.21:t231c,a232g,g270a;LP=2688;RP=2952;RA=-0.135;PRIOR=false;SR=4121;AF=0.146848;AC=205	0.132588	0.146848	0.0332734	0.256079	0.150794	0.0789931	.
1	8228967	ALU	TSD=dGGGAGGGAGGGAGGGAGG;ASSESS=5;INTERNAL=null,null;SVTYPE=ALU;SVLEN=279;MEINFO=AluY,1,280,+;DIFF=0.54:c4g,g11a,g49a,g54a,c57t,c64t,c83a,c87t,t124a,c126a,g139a,g143a,c174g,g196c,g197c,g199t,g201a,c206t,g214a,a216t,c218g,g237a,c238t,g239a;LP=9;RP=5;RA=0.848;PRIOR=false;SR=18;AF=0.00793651;AC=1	.	.	0.00044964	.	0.00793651	.	.
1	8236314	ALU	TSD=null;ASSESS=4;INTERNAL=null,null;SVTYPE=ALU;SVLEN=279;MEINFO=AluSg,1,280,+;DIFF=0.91:c53t,g58a,d65-66,i129a,g140a,g146a,c153g,g156a,a163g,c197t,g219c,g232a,c237a,c251a,g254a,c261a,d266-282;LP=32;RP=54;RA=-0.755;PRIOR=false;SR=9;AF=0.00139776;AC=7	0.00139776	.	.	.	.	.	.
1	8309855	ALU	TSD=AAAAAAAAAAAAAAAAAAAA;ASSESS=5;INTERNAL=NM_001080397,PROMOTER;SVTYPE=ALU;SVLEN=279;MEINFO=AluSz,1,280,-;DIFF=0.95:g9a,c53t,g58a,t65g,g88t,i129a,c151t,c153g,a163g,c197g,g208a,c237t,g270a;LP=25;RP=24;RA=0.059;PRIOR=false;SR=17;AF=0.00694444;AC=8	.	.	.	.	.	0.00694444	.
1	8369537	ALU	TSD=AAAAAAAAAAAAAAAAAAAAAAAAAAAAA;ASSESS=5;INTERNAL=NM_001042681,INTRONIC;SVTYPE=ALU;SVLEN=279;MEINFO=AluY,1,280,-;DIFF=0.98:c4t,g9a,g49a,g54a,g261a,g269a;LP=30;RP=41;RA=-0.451;PRIOR=false;SR=22;AF=0.0415473;AC=58;GENE=RERE	.	0.0415473	.	0.0594416	.	.	.
1	8386575	ALU	TSD=GAACTCTT;ASSESS=5;INTERNAL=NM_001042681,INTRONIC;SVTYPE=ALU;SVLEN=281;MEINFO=AluYa5,0,281,-;DIFF=1:t89c,c96a,g145a,c174t,g237c,g261a;LP=9346;RP=8843;RA=0.08;PRIOR=false;SR=10032;AF=0.326648;AC=456;GENE=RERE	0.349241	0.326648	0.333183	0.216902	0.357143	0.352431	.
1	8403848	LINE1	TSD=TTTTTTTTTTTTTTTTTTTTTTT;ASSESS=5;INTERNAL=RERE,INTRONIC;SVTYPE=LINE1;SVLEN=2574;MEINFO=L1Ambig,3444,6018,-;DIFF=0:n1-3443,c3528a,t3534c,g3549a,a3585g,n3594-6019;LP=1;RP=2;RA=-1;ISTP=0;PRIOR=false;SR=9;AF=0.237766;AC=1584	.	.	.	0.237766	.	.	.
1	8407010	ALU	TSD=AAGAATAACTCTGG;ASSESS=5;INTERNAL=RERE,INTRONIC;SVTYPE=ALU;SVLEN=280;MEINFO=AluYb8,1,281,+;DIFF=1:c57t,c64t,c98a,t144c,g211a,c236t,c248g,i252gcagtcc,g253a,a252g;LP=21;RP=21;RA=0;PRIOR=false;SR=60;AF=0.000450315;AC=3	.	.	.	0.000450315	.	.	.
1	8411346	ALU	TSD=AAAGAGATGGGG;ASSESS=5;INTERNAL=NM_001042681,INTRONIC;SVTYPE=ALU;SVLEN=279;MEINFO=AluYb8,2,281,+;DIFF=1:c57t,c64t,c98a,i127aa,t144c,g211a,c236t,c248g,i252gcagtcc,g253a,a252g;LP=9;RP=10;RA=-0.152;PRIOR=false;SR=4;AF=0.000199681;AC=1	0.000199681	.	.	.	.	.	.
1	8417441	ALU	TSD=AAAAATTTAAATCTC;ASSESS=5;INTERNAL=NM_001042681,INTRONIC;SVTYPE=ALU;SVLEN=281;MEINFO=AluYa1_2,0,281,+;DIFF=0.89:g151a,c236t,g237c,c240t,c251t,c260a;LP=39;RP=44;RA=-0.174;PRIOR=false;SR=17;AF=0.000716332;AC=1;GENE=RERE	0.000798722	0.000716332	.	.	.	.	.
1	8441947	ALU	TSD=CAATACACACACTTTTT;ASSESS=5;INTERNAL=NM_001042681,INTRONIC;SVTYPE=ALU;SVLEN=279;MEINFO=AluYb3a1,2,281,-;DIFF=1:a28g,c57t,c64t,t144c,c174g,g211a,c236t,i252gcagtcc,c248g,a252g;LP=2324;RP=1515;RA=0.617;PRIOR=false;SR=2551;AF=0.104585;AC=146;GENE=RERE	0.109425	0.104585	0.211781	0.0400781	0.119048	0.152778	.
1	8453336	ALU	TSD=CCCACCCCACTCTTT;ASSESS=5;INTERNAL=NM_001042681,INTRONIC;SVTYPE=ALU;SVLEN=280;MEINFO=AluYa1_2,1,281,-;DIFF=1:c4t,c53t,c174t,g237c;LP=25;RP=33;RA=-0.401;PRIOR=false;SR=15;AF=0.000199681;AC=1	0.000199681	.	.	.	.	.	.
1	8459560	ALU	TSD=TCAAGTTATAATTTCTTT;ASSESS=5;INTERNAL=NM_001042681,INTRONIC;SVTYPE=ALU;SVLEN=280;MEINFO=AluYa5,1,281,-;DIFF=1:t89c,c96a,g145a,c174t,g237c,i127a;LP=9;RP=12;RA=-0.415;PRIOR=false;SR=17;AF=0.000716332;AC=1;GENE=RERE	0.000199681	0.000716332	.	.	.	.	.
1	8468240	ALU	TSD=null;ASSESS=3;INTERNAL=NM_001042681,INTRONIC;SVTYPE=ALU;SVLEN=279;MEINFO=AluY,1,280,+;DIFF=1:c4a,g9a,c10t,c16t,c96a,c174t,g207a;LP=27;RP=57;RA=-1.078;PRIOR=false;SR=8;AF=0.000199681;AC=1	0.000199681	.	.	.	.	.	.
1	8468257	ALU	TSD=AAAAATAAAATACTATT;ASSESS=5;INTERNAL=NM_001042681,INTRONIC;SVTYPE=ALU;SVLEN=281;MEINFO=AluYa3_5,0,281,+;DIFF=1:c96a,g145a,c174t;LP=27;RP=38;RA=-0.493;PRIOR=false;SR=11;AF=0.000716332;AC=1;GENE=RERE	.	0.000716332	.	.	.	.	.
1	8503130	SVA	TSD=AAATAAATAAATAAATAAATAAATAAATAAA;ASSESS=5;INTERNAL=RERE,INTRONIC;SVTYPE=SVA;SVLEN=365;MEINFO=SVA,950,1315,+;DIFF=0.19:n1-949,g1009t,c1019t,a1053g,g1067a,a1079g,g1107a,n1121-1192,g1268a,t1292c;LP=19;RP=111;RA=-2.546;PRIOR=false;SR=67;AF=0.00150105;AC=10	.	.	.	0.00150105	.	.	.
1	8517080	ALU	TSD=AGAACTACACGCACACA;ASSESS=5;INTERNAL=NM_001042681,INTRONIC;SVTYPE=ALU;SVLEN=281;MEINFO=AluYc1,0,281,+;DIFF=1:c92g,g99a,g148a;LP=8;RP=11;RA=-0.459;PRIOR=false;SR=10;AF=0.000199681;AC=1	0.000199681	.	.	.	.	.	.
1	8602536	ALU	TSD=AAAAAAAAAGAAAAAAAAAAAA;ASSESS=5;INTERNAL=NM_001042681,INTRONIC;SVTYPE=ALU;SVLEN=279;MEINFO=AluY,1,280,+;DIFF=0.9:g5a,c98t,g139a,g175a,g196c,g199a,g207a,c213t,g226a,c230t,g231c,c236a,c276t;LP=56;RP=80;RA=-0.515;PRIOR=false;SR=25;AF=0.00954861;AC=11	0.000599042	.	.	0.000150105	.	0.00954861	.
1	8606897	SVA	TSD=null;ASSESS=3;INTERNAL=NM_001042681,INTRONIC;SVTYPE=SVA;SVLEN=389;MEINFO=SVA,926,1315,+;DIFF=0.28:n1-925,a931g,a934t,g938a,n945,g1009t,c1019t,a1053g,g1067a,a1079g,c1129g,t1131c,c1157t,g1268a,t1292c;LP=1;RP=13;RA=-3.7;PRIOR=false;SR=9;GENE=RERE;AF=0.000199681;AC=1	0.000199681	.	.	.	.	.	.
1	8676081	ALU	TSD=AAGAAAACTG;ASSESS=5;INTERNAL=RERE,INTRONIC;SVTYPE=ALU;SVLEN=96;MEINFO=AluYb,185,281,+;DIFF=0.35:c4t,g9a,g11a,c53t,g58a,a63g,c64t,g67c,a76t,c78t,c83g,a85t,g136t,g139a,g211a,c236t,c248g,i252gcagtcc,g253a,a252g;LP=11;RP=5;RA=1.138;PRIOR=false;SR=13;AF=0.000150105;AC=1	.	.	.	0.000150105	.	.	.
1	8690295	ALU	TSD=TCTTCCTCTTCTT;ASSESS=5;INTERNAL=RERE,INTRONIC;SVTYPE=ALU;SVLEN=281;MEINFO=AluYb11,0,281,-;DIFF=1:c57t,c64t,c98a,t144c,c174g,i201t,g211a,c236t,i252gcagtcc,c248g;LP=28;RP=33;RA=-0.237;PRIOR=false;SR=40;AF=0.00030021;AC=2	.	.	.	0.00030021	.	.	.
1	8692716	ALU	TSD=ATAAACGCTATATTTTTT;ASSESS=5;INTERNAL=RERE,INTRONIC;SVTYPE=ALU;SVLEN=281;MEINFO=AluYb8,0,281,-;DIFF=1:c57t,c64t,c98a,t144c,g211a,c236t,c248g,i252gcagtcc,g253a,a252g;LP=9;RP=16;RA=-0.83;PRIOR=false;SR=18;AF=0.000150105;AC=1	.	.	.	0.000150105	.	.	.
1	8694047	ALU	TSD=AAAAAAAAAAAAAAAAAA;ASSESS=5;INTERNAL=NM_001042681,INTRONIC;SVTYPE=ALU;SVLEN=279;MEINFO=AluSg,1,280,+;DIFF=0.99:g5a,c57t,d65-66,g67a,c95t,i129a,c153g,g215a,c231t,g238a,c239t,c244t,c261t,g262a,g266c,c269t,t279a;LP=30;RP=42;RA=-0.485;PRIOR=false;SR=10;AF=0.0173611;AC=20	.	.	.	.	.	0.0173611	.
1	8700950	SVA	TSD=null;ASSESS=3;INTERNAL=RERE,INTRONIC;SVTYPE=SVA;SVLEN=1240;MEINFO=SVA,75,1315,+;DIFF=0.33:n1-1083,t1109g,c1129g,c1146a,c1163a,c1164t,t1267c,g1268a,g1310t;LP=20;RP=20;RA=0;PRIOR=false;SR=10;AF=0.00030021;AC=2	.	.	.	0.00030021	.	.	.
1	8706131	SVA	TSD=AAAAAAAAAAAAAAAAAA;ASSESS=5;INTERNAL=NM_001042681,INTRONIC;SVTYPE=SVA;SVLEN=691;MEINFO=SVA,625,1316,+;DIFF=0.41:n1-407,n410,n412-413,a414t,g417t,n418-418,n423,n428-429,n438,n440-441,n450,n455,n457,c459g,n461,n470,c485t,a487c,c508t,a513g,g533a,a561c,t564c,t565a,t580c,t582c,g596a,g615a,c631t,c635g,a653g,c661t,a668g,c684t,n691-736,g758a,g764c,a773g,n788-862,g880c,g938a,c945a,t970c,t985c,g1009t,a…	0.000998403	0.00143266	.	.	.	.	.
1	8724890	ALU	TSD=AAAAAAAAAAAAAAA;ASSESS=5;INTERNAL=NM_001042681,INTRONIC;SVTYPE=ALU;SVLEN=279;MEINFO=AluY,1,280,+;DIFF=0.93:g5a,g9t,c10t,c53t,g54a,i65gt,a76t,g79a,c98t,c138t,g139a,g143a,c150t,g199t,g207a,g237a,c238t,c260a,g267a,c268a,t274g;LP=43;RP=75;RA=-0.803;PRIOR=false;SR=84;AF=0.0386819;AC=54;GENE=RERE	.	0.0386819	0.0656475	0.0752026	0.015873	0.0607639	.
1	8736875	ALU	TSD=AAAAAAAAAAAAAAAAAAAAAAAA;ASSESS=5;INTERNAL=NM_001042681,INTRONIC;SVTYPE=ALU;SVLEN=279;MEINFO=AluY,1,280,+;DIFF=0.94:c4t,g9a,g11a,g15a,g21a,c53t,c57t,i65gt,c98t,g110a,g175a,c198t,c206t,g237a,c238t,c260t,c268t;LP=38;RP=53;RA=-0.48;PRIOR=false;SR=28;AF=0.00694444;AC=8	.	.	.	.	.	0.00694444	.
1	8740133	ALU	TSD=AAGAACACTTACC;ASSESS=5;INTERNAL=RERE,INTRONIC;SVTYPE=ALU;SVLEN=281;MEINFO=AluYa3_4,0,281,+;DIFF=0.96:d85-95,g145a,c174t,g237c,c248g;LP=19;RP=18;RA=0.078;PRIOR=false;SR=19;AF=0.00030021;AC=2	.	.	.	0.00030021	.	.	.
1	8740576	ALU	TSD=AACAACTCAGCTT;ASSESS=5;INTERNAL=NM_001042681,INTRONIC;SVTYPE=ALU;SVLEN=280;MEINFO=AluYa5,1,281,-;DIFF=1:t89c,c96a,i119a,g145a,t147c,c174t,g237c;LP=40;RP=25;RA=0.678;PRIOR=false;SR=46;AF=0.000399361;AC=2	0.000399361	.	.	.	.	.	.
1	8744548	SVA	TSD=null;ASSESS=3;INTERNAL=NM_001042681,INTRONIC;SVTYPE=SVA;SVLEN=1240;MEINFO=SVA,75,1315,+;DIFF=0.45:n1-930,g938a,c945a,t970c,t985c,c990t,g1009t,a1053g,g1067a,a1079g,c1129g,c1146a,c1163a,c1164t,t1267c,g1268a,g1310t;LP=17;RP=21;RA=-0.305;PRIOR=false;SR=17;GENE=RERE;AF=0.000199681;AC=1	0.000199681	.	.	.	.	.	.
1	8744566	ALU	TSD=AGAAAAAGTATACCAACC;ASSESS=5;INTERNAL=NM_001042681,INTRONIC;SVTYPE=ALU;SVLEN=52;MEINFO=AluY,229,281,+;DIFF=0.42:c8t,c16t,c57t,c64t,c98a,g110a,c126a,g143a,c169a,g199a,c213t,g215t,c218g,c222t,g237a;LP=5;RP=2;RA=1.322;PRIOR=false;SR=10;AF=0.000199681;AC=1	0.000199681	.	.	.	.	.	.
1	8771909	SVA	TSD=null;ASSESS=3;INTERNAL=NM_001042681,INTRONIC;SVTYPE=SVA;SVLEN=369;MEINFO=SVA,946,1315,+;DIFF=0.28:n1-945,g1009t,c1019t,a1041g,a1053g,g1067a,a1068g,a1079g,a1102g,a1116g,c1129g,a1132g,c1157t,a1178g,a1213g,a1260g,g1268a,t1292c;LP=1;RP=14;RA=-3.807;PRIOR=false;SR=7;AF=0.000716332;AC=1;GENE=RERE	0.000199681	0.000716332	.	0.00060042	.	.	.
1	8841629	ALU	TSD=AAAAAAAAAAAAAAAAAAAAAA;ASSESS=5;INTERNAL=ENO1,TERMINATOR;SVTYPE=ALU;SVLEN=279;MEINFO=AluY,1,280,-;DIFF=0.95:c4t,c8t,g11a,g25a,c48t,c53t,c98a,g100a,c107t,c109a,t111c,g139a,g140t,g143t,t144a,g151a,g152t,g162a,c174t,c205a,g207a,g214a,c230t,c260t,c276t,g277t;LP=14;RP=3;RA=2.222;PRIOR=false;SR=9;AF=0.0576403;AC=384	.	.	.	0.0576403	.	.	.
1	8844000	ALU	TSD=null;ASSESS=3;INTERNAL=null,null;SVTYPE=ALU;SVLEN=279;MEINFO=AluY,1,280,+;DIFF=1:g5a,c8t,c20t,c57t,g139a,g207a,c260t,g277a,i127a;LP=95;RP=61;RA=0.639;PRIOR=false;SR=8;AF=0.000399361;AC=2	0.000399361	.	.	.	.	.	.
1	8852559	ALU	TSD=AAAGAAAGAAAGAAAGAAAGAAAGAAAGAAA;ASSESS=5;INTERNAL=NM_001201483,TERMINATOR;SVTYPE=ALU;SVLEN=279;MEINFO=AluY,1,280,+;DIFF=0.81:g5a,g9a,g11a,g54a,a76t,t93c,c98t,c150t,g155a,g162a,g199a,g209t,c213a,g214a,g231a;LP=54;RP=69;RA=-0.354;PRIOR=false;SR=73;AF=0.0303819;AC=35	.	.	.	.	.	0.0303819	.
1	8862596	ALU	TSD=GAAAGCTCTAAGA;ASSESS=5;INTERNAL=NM_001428,INTRONIC;SVTYPE=ALU;SVLEN=281;MEINFO=AluYb8,0,281,+;DIFF=1:c47g,c57t,c64t,c98a,t144c,g211a,c236t,i252gcagtcc,c248g,a252g;LP=39;RP=38;RA=0.037;PRIOR=false;SR=40;AF=0.000399361;AC=2	0.000399361	.	.	.	.	.	.
1	8869244	ALU	TSD=AAAAAAAAGTCAGGGG;ASSESS=5;INTERNAL=NM_001428,INTRONIC;SVTYPE=ALU;SVLEN=281;MEINFO=AluYc1,0,281,+;DIFF=1:g148a,c248g;LP=689;RP=814;RA=-0.241;PRIOR=false;SR=598;AF=0.0329513;AC=46;GENE=ENO1	0.024361	0.0329513	.	0.0746022	.	0.00694444	.
1	8928476	ALU	TSD=null;ASSESS=4;INTERNAL=null,null;SVTYPE=ALU;SVLEN=279;MEINFO=AluSz,1,280,-;DIFF=0.87:g9a,c10t,c18a,c53t,g58a,d64-65,t78a,g81a,g88t,i129a,g140a,c153g,g156a,g176a,g198c,c207t,g208a,g219t,c223t,g227a,g232a,c237t,g238a,g270a;LP=105;RP=155;RA=-0.562;PRIOR=false;SR=26;AF=0.00347222;AC=4	0.000199681	.	.	0.00030021	.	0.00347222	.
1	8941196	SVA	TSD=null;ASSESS=4;INTERNAL=CA6,PROMOTER;SVTYPE=SVA;SVLEN=1236;MEINFO=SVA,79,1315,+;DIFF=0.03:n1-1158,a1166g,n1220,g1268a,n1307-1316;LP=1;RP=6;RA=-2.585;PRIOR=false;SR=1;AF=0.00044964;AC=1	.	.	0.00044964	.	.	.	.
1	8960410	ALU	TSD=null;ASSESS=4;INTERNAL=NM_001215,INTRONIC;SVTYPE=ALU;SVLEN=279;MEINFO=AluY,1,280,-;DIFF=0.95:c4t,c8t,g9t,c57t,t93c,c98t,g143a,g162a,g175a,g199a,g207a,g214a,c218g,c238t,g259a;LP=47;RP=115;RA=-1.291;PRIOR=false;SR=11;AF=0.0225694;AC=26	.	.	.	.	.	0.0225694	.
1	8978674	ALU	TSD=AAA;ASSESS=5;INTERNAL=CA6,TERMINATOR;SVTYPE=ALU;SVLEN=279;MEINFO=AluY,1,280,+;DIFF=0.95:c4t,c78t,t86g,c142t,g145a,g151a,g155a,c174a,g180a,g269a,a272t,c276t;LP=73;RP=188;RA=-1.365;PRIOR=false;SR=263;AF=0.105974;AC=706	.	.	.	0.105974	.	.	.
1	8994602	ALU	TSD=AAGAACCTTGATCT;ASSESS=5;INTERNAL=NM_207420,TERMINATOR;SVTYPE=ALU;SVLEN=281;MEINFO=AluYa5,0,281,+;DIFF=1:t89c,c96a,g145a,c174t,g237c;LP=14;RP=12;RA=0.222;PRIOR=false;SR=10;AF=0.000716332;AC=1;GENE=SLC2A7	0.000199681	0.000716332	.	.	.	.	.
1	9078365	ALU	TSD=AAGAATGCCTAAACC;ASSESS=5;INTERNAL=SLC2A5,PROMOTER;SVTYPE=ALU;SVLEN=281;MEINFO=AluYb6_2,0,281,+;DIFF=0.91:c4t,g5a,c8a,g9a,c57t,c64t,c98a,t144c,g211a,c236t;LP=36;RP=24;RA=0.585;PRIOR=false;SR=10;AF=0.000150105;AC=1	.	.	.	0.000150105	.	.	.
1	9081489	ALU	TSD=null;ASSESS=4;INTERNAL=null,null;SVTYPE=ALU;SVLEN=279;MEINFO=AluSz,1,280,-;DIFF=0.98:c4t,g11a,g21a,t65g,g93a,i129a,c153g,c155t,a163g,c197g,g208a,c269t;LP=60;RP=65;RA=-0.115;PRIOR=false;SR=36;AF=0.0469565;AC=54	.	.	.	.	.	0.0469565	.
1	9082895	ALU	TSD=AAAAAAAAAAAAAAA;ASSESS=5;INTERNAL=null,null;SVTYPE=ALU;SVLEN=279;MEINFO=AluY,1,280,+;DIFF=0.96:g21a,c53t,c57a,c98t,g110a,g199t,g207a,g214a,c218g,c236t,g239a;LP=24;RP=47;RA=-0.97;PRIOR=false;SR=22;AF=0.00520833;AC=6	.	.	.	.	.	0.00520833	.
1	9091645	ALU	TSD=CCTTCAATGCCAATTTT;ASSESS=5;INTERNAL=null,null;SVTYPE=ALU;SVLEN=277;MEINFO=AluYb8,4,281,-;DIFF=1:c57t,c64t,c98a,t144c,g211a,c236t,i252gcagtcc,g261a,c248g,a252g;LP=151;RP=160;RA=-0.084;PRIOR=false;SR=164;AF=0.00716332;AC=10;GENE=SLC2A5	0.0081869	0.00716332	.	0.0192134	.	0.000868056	.
1	9191888	ALU	TSD=null;ASSESS=3;INTERNAL=LINC01759,5_UTR;SVTYPE=ALU;SVLEN=279;MEINFO=AluY,1,280,+;DIFF=0.52:c3t,g5a,c10t,g54a,g139a,g143a,g145c,g151t,t170c;LP=3;RP=3;RA=0;PRIOR=false;SR=3;AF=0.00030021;AC=2	.	.	.	0.00030021	.	.	.
1	9253794	ALU	TSD=CCAACTGTGTTTTCT;ASSESS=5;INTERNAL=NM_001282587,INTRONIC;SVTYPE=ALU;SVLEN=280;MEINFO=AluYa4_5,1,281,-;DIFF=1:t89c,c96a,g145a,g152c,c174t;LP=21;RP=32;RA=-0.608;PRIOR=false;SR=13;AF=0.000716332;AC=1;GENE=H6PD	0.000199681	0.000716332	.	.	.	.	.
1	9274729	ALU	TSD=TTTTTTTTTTTTTTTTTTTTTTTTTTT;ASSESS=5;INTERNAL=NM_001282587,TERMINATOR;SVTYPE=ALU;SVLEN=279;MEINFO=AluY,1,280,-;DIFF=0.99:g9a,g11a,g21a,g58a,i65gt,t86g,t93c,c98t,c109t,c138t,c142t,c154t,g199t;LP=68;RP=57;RA=0.255;PRIOR=false;SR=67;AF=0.00520833;AC=6	.	.	.	.	.	0.00520833	.
1	9292845	ALU	TSD=null;ASSESS=4;INTERNAL=SPSB1,PROMOTER;SVTYPE=ALU;SVLEN=264;MEINFO=AluSz,16,280,-;DIFF=0.44:c206t,c207t,c214t,d219-282;LP=2;RP=6;RA=-1.585;PRIOR=false;SR=4;AF=0.0152312;AC=1512	.	.	.	.	.	.	0.0152312
1	9308670	ALU	TSD=CTGTAGATGGGTTTTT;ASSESS=5;INTERNAL=NM_025106,INTRONIC;SVTYPE=ALU;SVLEN=279;MEINFO=AluYb8,2,281,-;DIFF=1:c57t,c64t,c98a,t144c,i207g,g211a,c236t,c248g,i252gcagtcc,g261a,a252g;LP=14;RP=10;RA=0.485;PRIOR=false;SR=14;AF=0.000716332;AC=1;GENE=SPSB1	0.000399361	0.000716332	.	0.000450315	.	.	.
1	9369521	SVA	TSD=null;ASSESS=3;INTERNAL=SPSB1,3_UTR;SVTYPE=SVA;SVLEN=1240;MEINFO=SVA,75,1315,+;DIFF=0.38:n1-951,t970c,t985c,g1009t,a1053g,g1067a,a1079g,c1129g,c1146a,c1163a,c1164t,t1267c,g1268a,g1310t;LP=11;RP=16;RA=-0.541;PRIOR=false;SR=7;AF=0.00030021;AC=2	.	.	.	0.00030021	.	.	.
1	9380334	ALU	TSD=null;ASSESS=3;INTERNAL=SPSB1,TERMINATOR;SVTYPE=ALU;SVLEN=279;MEINFO=AluSz,1,280,+;DIFF=0.85:g5a,g9a,g11a,c20t,g21a,i52t,g52c,c57t,t66g,g70t,c72t,a73g,g75c,c80t,g93a,a97t,t103a,g112a,i134aatt,g152a,g154a,c155t,g176t,t200g,c207g,g208a,g210a,g219c,c230t,c231t,c237t,d266-282;LP=1285;RP=832;RA=0.627;PRIOR=false;SR=147;AF=0.0247673;AC=165	.	.	.	0.0247673	.	.	.
1	9389248	ALU	TSD=dAAAGCTACTAAGATTAAAAC;ASSESS=5;INTERNAL=SPSB1,TERMINATOR;SVTYPE=ALU;SVLEN=279;MEINFO=AluY,1,280,+;DIFF=1:c4t,g9a,c48t,g54a,g65a,g139a,g199t,i127a;LP=31;RP=41;RA=-0.403;PRIOR=false;SR=6;AF=0.000150105;AC=1	.	.	.	0.000150105	.	.	.
1	9396736	ALU	TSD=AAAAAAAAAAAAA;ASSESS=5;INTERNAL=LOC100506022,TERMINATOR;SVTYPE=ALU;SVLEN=279;MEINFO=AluY,1,280,-;DIFF=0.5:c98t,g99a,g139a,g141a,c142t;LP=29;RP=26;RA=0.158;PRIOR=false;SR=8;AF=0.00105074;AC=7	.	.	.	0.00105074	.	.	.
1	9434576	ALU	TSD=AGCCCATCCTAATTTT;ASSESS=5;INTERNAL=NR_104622,PROMOTER;SVTYPE=ALU;SVLEN=281;MEINFO=AluYh,0,281,-;DIFF=0.86:c48a,c64t,g99a,t111c,g145c,g237c;LP=13;RP=15;RA=-0.206;PRIOR=false;SR=15;AF=0.000199681;AC=1	0.000199681	.	.	.	.	.	.
1	9470091	ALU	TSD=dAGGAAGGAAGGAAGGAAGGAGAAAG;ASSESS=5;INTERNAL=null,null;SVTYPE=ALU;SVLEN=279;MEINFO=AluY,1,280,+;DIFF=0.56:c8t,g11a,c57t,g79c,c92t,c98t,c109t,c138t,c142t,c150t,g152c,c154t,g162a,g189a,g196c,g199t,c213t,g231a,c236t,c238t,g239a,g253a,c255t,g261a,c276a;LP=71;RP=69;RA=0.041;PRIOR=false;SR=48;AF=0.00954861;AC=11	.	.	.	.	.	0.00954861	.
1	9512324	ALU	TSD=AAAAAGTAAAGTAGA;ASSESS=5;INTERNAL=null,null;SVTYPE=ALU;SVLEN=281;MEINFO=AluYa5,0,281,+;DIFF=1:t89c,c96a,g145a,c174t,c213a,g237c;LP=285;RP=554;RA=-0.959;PRIOR=false;SR=656;AF=0.0379656;AC=53	0.0505192	0.0379656	0.122752	0.00975683	.	0.015625	.
1	9536540	ALU	TSD=null;ASSESS=3;INTERNAL=NM_032315,PROMOTER;SVTYPE=ALU;SVLEN=279;MEINFO=AluY,1,280,-;DIFF=0.99:c8t,g11a,c23t,c48t,c57a,c98t,c109t,g139a,g143a,g162a,c174t,c236t,g277a;LP=61;RP=71;RA=-0.219;PRIOR=false;SR=46;AF=0.0274336;AC=31	.	.	.	.	.	0.0274336	.
1	9572909	ALU	TSD=null;ASSESS=3;INTERNAL=NM_032315,INTRONIC;SVTYPE=ALU;SVLEN=279;MEINFO=AluY,1,280,+;DIFF=1:c4t,g9a,c98t,c138t,g199t,c206t,g237a,g239a;LP=115;RP=96;RA=0.261;PRIOR=false;SR=7;AF=0.000868056;AC=1	.	.	.	.	.	0.000868056	.
1	9573426	SVA	TSD=AGAAGTAAGTTATTATTT;ASSESS=5;INTERNAL=NM_032315,INTRONIC;SVTYPE=SVA;SVLEN=1019;MEINFO=SVA,297,1316,-;DIFF=0.61:n1-296,g303a,t324c,c352t,g362a,t366c,a372g,c385g,c386t,a395g,t405c,g406c,t408a,i471gggg,a487c,a513g,g523t,a561c,t564c,c576t,a578g,t580c,t582c,g587a,c631a,n646-661,n668,c670g,g676a,n682,n695,t729c,g748t,g764c,a773g,n800-871,g880c,n882,a886g,g887a,g898a,t922g,a931g,a934t,g938a,n941,c945…	0.000199681	0.000716332	.	.	.	.	.
1	9576762	ALU	TSD=GAAATCCGAAATTTC;ASSESS=5;INTERNAL=NM_032315,INTRONIC;SVTYPE=ALU;SVLEN=281;MEINFO=AluYb8,0,281,+;DIFF=1:c57t,c64t,c98a,t144c,g211a,c236t,i252gcagtcc,g253c,c254g,c248g,a252g;LP=679;RP=693;RA=-0.029;PRIOR=false;SR=810;AF=0.030086;AC=42;GENE=SLC25A33	0.0171725	0.030086	.	0.0660462	0.00793651	0.00954861	.
1	9586713	ALU	TSD=AAGACTGCATGGA;ASSESS=5;INTERNAL=TMEM201,PROMOTER;SVTYPE=ALU;SVLEN=280;MEINFO=AluYa5,1,281,+;DIFF=1:t89c,c96a,g145a,c174t,g237c;LP=41;RP=41;RA=0;PRIOR=false;SR=38;AF=0.000450315;AC=3	.	.	.	0.000450315	.	.	.
1	9625571	SVA	TSD=GCTAATTTTTGCATTTTT;ASSESS=5;INTERNAL=TMEM201,TERMINATOR;SVTYPE=SVA;SVLEN=1313;MEINFO=SVA,3,1316,-;DIFF=0.2:n1-1082,c1129a,c1190t,d1232-1234,t1292c;LP=8;RP=2;RA=2;PRIOR=false;SR=2;AF=0.000150105;AC=1	.	.	.	0.000150105	.	.	.
1	9643662	ALU	TSD=AAACATTTT;ASSESS=5;INTERNAL=PIK3CD,PROMOTER;SVTYPE=ALU;SVLEN=280;MEINFO=AluYb8,1,281,-;DIFF=0.97:c57t,c64t,c98a,t144c,g211a,c236t,i252gcagtcc,c248g,a252g;LP=36;RP=38;RA=-0.078;PRIOR=false;SR=38;AF=0.00030021;AC=2	.	.	.	0.00030021	.	.	.
1	9664129	LINE1	TSD=null;ASSESS=1;INTERNAL=PIK3CD,INTRONIC;SVTYPE=LINE1;SVLEN=2850;MEINFO=L1Ambig,3168,6018,+;DIFF=0.01:n1-5192,a5199t,g5208c,c5214t,n5226,g5251a,a5256c,a5258g,n5262,g5268a,c5284t,c5288t,c5315a,t5316a,t5325c,c5333t,a5334g,g5338a,n5344-5585,n5712-6019;LP=4;RP=13;RA=-1.7;ISTP=-1;PRIOR=false;SR=0;AF=0.000150105;AC=1	.	.	.	0.000150105	.	.	.
1	9754203	ALU	TSD=ACTTTTTCAATTTTT;ASSESS=5;INTERNAL=CLSTN1,INTRONIC;SVTYPE=ALU;SVLEN=281;MEINFO=AluYc1,0,281,-;DIFF=1:c57t,c83t,t89c,c96a,g148a,c240t,t244c;LP=107;RP=92;RA=0.218;PRIOR=false;SR=142;AF=0.00345242;AC=23	.	.	0.0125899	0.00345242	.	.	.
1	9781358	ALU	TSD=AAAAATTTTCCTTTTT;ASSESS=5;INTERNAL=NM_014944,INTRONIC;SVTYPE=ALU;SVLEN=280;MEINFO=AluYk,1,281,-;DIFF=1:c57t,c64t,c92g,g99a,g155t,g207a,g214a,c236t,g269c,c276t;LP=18;RP=18;RA=0;PRIOR=false;SR=11;AF=0.000199681;AC=1	0.000199681	.	.	.	.	.	.
1	9783441	LINE1	TSD=TAAAAAATTAGGCT;ASSESS=5;INTERNAL=CLSTN1,INTRONIC;SVTYPE=LINE1;SVLEN=-1;MEINFO=L1Ta,-1,6019,+;DIFF=0.03:n1-5218,n5370-5437,g5586a,t5628c,n5642-5731,n5885,c5945t,n5973,n6002-6019;LP=5;RP=2;RA=1.322;ISTP=5607;PRIOR=false;SR=2;GENE=CLSTN1;AF=0.00044964;AC=1	.	.	0.00044964	.	.	.	.
1	9811731	ALU	TSD=null;ASSESS=3;INTERNAL=NM_014944,INTRONIC;SVTYPE=ALU;SVLEN=279;MEINFO=AluSz,1,280,-;DIFF=0.92:g9a,g11a,g49a,t65g,t78a,i129a,c143t,c151t,c153g,c197t,g208a,c214t,g219c,c231t,c237t,c241t,c261t,c277t;LP=80;RP=89;RA=-0.154;PRIOR=false;SR=20;AF=0.000868056;AC=1	.	.	.	.	.	0.000868056	.
1	9847371	ALU	TSD=AAAGAGGCAGATC;ASSESS=5;INTERNAL=NM_001012329,TERMINATOR;SVTYPE=ALU;SVLEN=281;MEINFO=AluYa5,0,281,+;DIFF=1:t89c,c96a,g145a,c174t,g237c;LP=13;RP=9;RA=0.531;PRIOR=false;SR=23;AF=0.000199681;AC=1	0.000199681	.	.	.	.	.	.
1	9855268	ALU	TSD=null;ASSESS=4;INTERNAL=CTNNBIP1,INTRONIC;SVTYPE=ALU;SVLEN=279;MEINFO=AluSz,1,280,-;DIFF=0.38:g5a,g9a,c20t,g21a,g49a,c53t,g58a,t65g,g70a,c94a,g101a,g104a,c109t,i129a,g141a,g152a,c153g,g169a,d175-282;LP=3;RP=5;RA=-0.737;PRIOR=false;SR=1;AF=0.00195137;AC=13	.	.	.	0.00195137	.	.	.
1	9886097	ALU	TSD=null;ASSESS=3;INTERNAL=NM_001012329,INTRONIC;SVTYPE=ALU;SVLEN=280;MEINFO=AluYa4_3,1,281,-;DIFF=1:t89c,c96a,c150t,c154t,c174t,g199t,g237c;LP=18;RP=35;RA=-0.959;PRIOR=false;SR=11;AF=0.000868056;AC=1	.	.	.	.	.	0.000868056	.
1	9886113	ALU	TSD=GAATTCAAAGGCTTTT;ASSESS=5;INTERNAL=NM_001012329,INTRONIC;SVTYPE=ALU;SVLEN=280;MEINFO=AluYa5,1,281,-;DIFF=1:t89c,c96a,i127aaaaa,g145a,c174t,g237c;LP=75;RP=72;RA=0.059;PRIOR=false;SR=92;AF=0.00358166;AC=5;GENE=CTNNBIP1	0.00638978	0.00358166	.	0.0132092	.	.	.
1	9990947	ALU	TSD=AAAGAAAAAAAAAA;ASSESS=5;INTERNAL=RBP7,PROMOTER;SVTYPE=ALU;SVLEN=279;MEINFO=AluYa4_5,1,280,-;DIFF=1:t89c,c96a,g145a,c174t;LP=14;RP=11;RA=0.348;PRIOR=false;SR=7;AF=0.000150105;AC=1	.	.	.	0.000150105	.	.	.
1	10003002	ALU	TSD=AGCAGCTTTTC;ASSESS=5;INTERNAL=RBP7,INTRONIC;SVTYPE=ALU;SVLEN=280;MEINFO=AluYg,1,281,-;DIFF=1:g52a,c53t,g152c,g153a,a161g,t173a,c229t,g271a;LP=53;RP=30;RA=0.821;PRIOR=false;SR=47;AF=0.000450315;AC=3	.	.	.	0.000450315	.	.	.
1	10036099	ALU	TSD=TTTTTT;ASSESS=5;INTERNAL=NM_001105562,INTRONIC;SVTYPE=ALU;SVLEN=279;MEINFO=AluY,1,280,+;DIFF=0.94:c10t,g21a,g25a,c37t,c48a,g49a,g65a,g99a,c109t,g139a,c142t,g199a,c273t;LP=36;RP=64;RA=-0.83;PRIOR=false;SR=9;AF=0.00173611;AC=2	.	.	.	.	.	0.00173611	.
1	10082657	ALU	TSD=null;ASSESS=4;INTERNAL=NM_001105562,INTRONIC;SVTYPE=ALU;SVLEN=85;MEINFO=AluY,196,281,-;DIFF=1:g9a,g11a,g21a,c57t,a76t,t86g,c98t,g110a,c150t,c154t,c230t,c238t,c243t,g261a,c276t;LP=18;RP=17;RA=0.082;PRIOR=false;SR=3;AF=0.00434028;AC=5	.	.	.	.	.	0.00434028	.
1	10099422	ALU	TSD=AAAAAGTATTAACATATGGTACCTAGG;ASSESS=5;INTERNAL=NM_001105562,INTRONIC;SVTYPE=ALU;SVLEN=213;MEINFO=AluYb,68,281,+;DIFF=1:c48t,c57t,c98a,t144c,c236t;LP=46;RP=50;RA=-0.12;PRIOR=false;SR=23;AF=0.000199681;AC=1	0.000199681	.	.	.	.	.	.
1	10102181	SVA	TSD=TGTATAGTTCTTT;ASSESS=5;INTERNAL=NM_001105562,INTRONIC;SVTYPE=SVA;SVLEN=1240;MEINFO=SVA,75,1315,+;DIFF=0.34:n1-955,t970c,t985c,g1009t,a1053g,g1067a,a1079g,g1082a,c1129g,c1146a,c1163a,c1164t,a1193g,t1267c,g1268a,g1310t;LP=9;RP=8;RA=0.17;PRIOR=false;SR=4;AF=0.000716332;AC=1;GENE=UBE4B	.	0.000716332	.	.	.	.	.
1	10119839	ALU	TSD=null;ASSESS=3;INTERNAL=NM_001105562,INTRONIC;SVTYPE=ALU;SVLEN=279;MEINFO=AluY,1,280,+;DIFF=0.99:g9a,g54a,c98t,c109t,g152c,g155a,g162a,g214a,g237a,c260t,g261a,g269a,c273g,c276t,g277a;LP=55;RP=61;RA=-0.149;PRIOR=false;SR=11;AF=0.000199681;AC=1	0.000199681	.	.	.	.	.	.
1	10216267	LINE1	TSD=TATGGCCACATTTTT;ASSESS=5;INTERNAL=KIF1B,INTRONIC;SVTYPE=LINE1;SVLEN=358;MEINFO=L1Ta,5661,6019,-;DIFF=0.06:n1-5661,a5826t,a5837c;LP=13;RP=8;RA=0.7;ISTP=0;PRIOR=false;SR=19;AF=0.000150105;AC=1	.	.	.	0.000150105	.	.	.
1	10240742	ALU	TSD=TTTTTTTTTTTTTTTTTTTTT;ASSESS=5;INTERNAL=NM_015074,INTRONIC;SVTYPE=ALU;SVLEN=279;MEINFO=AluY,1,280,-;DIFF=0.98:g139a,g143a,c154t,g162a,c174t,g199t,g207a,g214a,g269a,g277a;LP=8;RP=14;RA=-0.807;PRIOR=false;SR=8;AF=0.00501433;AC=7;GENE=KIF1B	0.00858626	0.00501433	.	0.0088562	.	0.0269097	.
1	10273709	ALU	TSD=null;ASSESS=3;INTERNAL=KIF1B,INTRONIC;SVTYPE=ALU;SVLEN=279;MEINFO=AluY,1,280,+;DIFF=0.73:g6a,c10t,c20t,g21a,g49a,i65gt,c78t,t86g,c87a,t93c,c96t,c98t,c106a,c109t,c138a,g141a,c142t,g155a,g159a,c174t,c204t,g207a,c213t,g214a,g228a,c230t,c236t,g239a,c240t,c246t,c251t,g259a,g261a,c268t,g271t,c276t,g277a;LP=5;RP=8;RA=-0.678;PRIOR=false;SR=4;AF=0.0333233;AC=222	.	.	.	0.0333233	.	.	.
1	10273739	ALU	TSD=AAAAAAAAAAAAAAAAAAAAAAAAAAAAAA;ASSESS=5;INTERNAL=NM_015074,INTRONIC;SVTYPE=ALU;SVLEN=279;MEINFO=AluSz,1,280,-;DIFF=0.98:c8t,g11a,t65g,c80t,g112a,i129a,g152a,c175t,c207t,g270a,c277t;LP=37;RP=45;RA=-0.282;PRIOR=false;SR=29;AF=0.034384;AC=48;GENE=KIF1B	0.0269569	0.034384	.	.	.	0.00868056	.
1	10281274	ALU	TSD=AAAAATAAGCTAATTTTA;ASSESS=5;INTERNAL=NM_015074,INTRONIC;SVTYPE=ALU;SVLEN=281;MEINFO=AluYa5,0,281,+;DIFF=1:t89c,i94aa,c96a,c98t,g145a,c174t,g237c,i127a;LP=24;RP=38;RA=-0.663;PRIOR=false;SR=17;AF=0.000199681;AC=1	0.000199681	.	.	.	.	.	.
1	10306784	ALU	TSD=null;ASSESS=4;INTERNAL=KIF1B,INTRONIC;SVTYPE=ALU;SVLEN=279;MEINFO=AluY,1,280,+;DIFF=1:c4t,g11a,g54t,c57t,g58a,c62t,g65a,t93c,c98t,g99a,g110a,g139a,g151a,g155a,g162a,g207a;LP=15;RP=89;RA=-2.569;PRIOR=false;SR=47;AF=0.0686635;AC=6790	.	.	.	.	.	.	0.0686635
1	10314984	ALU	TSD=AATAATTCCATGTA;ASSESS=5;INTERNAL=NM_015074,INTRONIC;SVTYPE=ALU;SVLEN=259;MEINFO=AluYa5,22,281,+;DIFF=0.98:g9t,t89c,c96a,g145a,c174t,g237c;LP=103;RP=130;RA=-0.336;PRIOR=false;SR=53;AF=0.00120048;AC=6	0.00120048	.	.	0.00632721	.	.	.
1	10349610	ALU	TSD=null;ASSESS=3;INTERNAL=NM_015074,INTRONIC;SVTYPE=ALU;SVLEN=279;MEINFO=AluY,1,280,+;DIFF=0.98:c4t,g9a,c10t,c48t,c57t,i65gt,c98t,c206t,c254a,c263t,g269a,c276t,g277a;LP=104;RP=97;RA=0.101;PRIOR=false;SR=3;AF=0.00173611;AC=2	.	.	.	.	.	0.00173611	.
1	10409355	ALU	TSD=null;ASSESS=3;INTERNAL=PGD,INTRONIC;SVTYPE=ALU;SVLEN=271;MEINFO=AluYb,9,280,-;DIFF=0.41:c48t,c53t,g58a,a71g,a76t,g79a,g211a,c236t,c248g,i252gcagtcc,g253a,a252g;LP=9;RP=9;RA=0;PRIOR=false;SR=12;AF=0.000150105;AC=1	.	.	.	0.000150105	.	.	.
1	10419865	ALU	TSD=null;ASSESS=4;INTERNAL=PGD,3_UTR;SVTYPE=ALU;SVLEN=279;MEINFO=AluY,1,280,-;DIFF=0.99:c8t,c98t,c138t,c142t,c150t,g175a,c198t,c206t,g207a,g237a;LP=21;RP=25;RA=-0.252;PRIOR=false;SR=4;AF=3.02486e-05;AC=3	.	.	.	.	.	.	3.02486e-05
1	10425382	ALU	TSD=CAGTGCAGTTTTTTTTTTTTTTT;ASSESS=5;INTERNAL=NM_199294,PROMOTER;SVTYPE=ALU;SVLEN=279;MEINFO=AluY,1,280,+;DIFF=0.98:c10t,c98t,c142t,g143a,c174t,c206t,g214a,c260t,g269a,g277a;LP=40;RP=53;RA=-0.406;PRIOR=false;SR=10;AF=0.00173611;AC=2	.	.	.	.	.	0.00173611	.
1	10456507	ALU	TSD=AAAAAGAAAAAAAAAAAAAAAAAAAAAAA;ASSESS=5;INTERNAL=NM_213566,TERMINATOR;SVTYPE=ALU;SVLEN=279;MEINFO=AluSg,1,280,+;DIFF=0.96:g5a,g9a,g49a,d65-66,g81a,g112a,i129a,c151t,c153g,a163g,t200a,c207a,g215a,g232a,g254a,c261t,g266t,c269t,g278a;LP=8;RP=29;RA=-1.858;PRIOR=false;SR=44;AF=0.0789931;AC=91	.	.	.	.	.	0.0789931	.
1	10486380	ALU	TSD=TTTTTTTTTTTTTTTTTTTT;ASSESS=5;INTERNAL=NM_004565,INTRONIC;SVTYPE=ALU;SVLEN=279;MEINFO=AluY,1,280,+;DIFF=0.93:g5a,g9a,c20t,g49a,c53t,c57t,c98t,g162a,g196c,g197a,g199t,c206t,g207a,c218g,c230t,g258a;LP=67;RP=76;RA=-0.182;PRIOR=false;SR=24;AF=0.00868056;AC=10	.	.	.	.	.	0.00868056	.
1	10562515	ALU	TSD=CCAGTTTT;ASSESS=5;INTERNAL=PEX14,INTRONIC;SVTYPE=ALU;SVLEN=279;MEINFO=AluYa4_5,2,281,-;DIFF=1:t89c,c96a,g145a,c174t,c236t;LP=39;RP=49;RA=-0.329;PRIOR=false;SR=39;AF=0.000450315;AC=3	.	.	.	0.000450315	.	.	.
1	10587920	ALU	TSD=TTTTTTTTTTTTTTTTTTTTTTTTT;ASSESS=5;INTERNAL=NM_004565,INTRONIC;SVTYPE=ALU;SVLEN=279;MEINFO=AluY,1,280,+;DIFF=0.94:c4t,c57t,g143a,c213t,g214a,g237t,g239a,g261a,c263a,g277a,d281;LP=13;RP=32;RA=-1.3;PRIOR=false;SR=8;AF=0.012894;AC=18;GENE=PEX14	.	0.012894	.	.	.	.	.
1	10711606	ALU	TSD=null;ASSESS=4;INTERNAL=CASZ1,INTRONIC;SVTYPE=ALU;SVLEN=269;MEINFO=AluSg,11,280,-;DIFF=0.4:g41a,c48t,g49a,c53a,c57t,d65-66,g67a,g69a,c80t,c90t,c111t,i129a,c139t,g144a,c153g,g160a,a163g,g176a,c205g,g212t,c214t,g229a,c231t,c276t,d280-282;LP=3;RP=3;RA=0;PRIOR=false;SR=1;AF=0.00105074;AC=7	.	.	.	0.00105074	.	.	.
1	10711607	ALU	TSD=AAAAAAAAAAAAAAAAGAAAAA;ASSESS=5;INTERNAL=NM_017766,INTRONIC;SVTYPE=ALU;SVLEN=279;MEINFO=AluY,1,280,+;DIFF=0.95:g5a,c10t,c20t,c48t,g54a,c57t,g58a,c78t,c98t,c109t,g199t,c230t,c238t,d281;LP=21;RP=45;RA=-1.1;PRIOR=false;SR=25;AF=0.0121528;AC=14	.	.	.	.	.	0.0121528	.
1	10783376	ALU	TSD=AAGAGTTCATTCCAGG;ASSESS=5;INTERNAL=NM_017766,INTRONIC;SVTYPE=ALU;SVLEN=278;MEINFO=AluYa5a1,3,281,+;DIFF=1:a82g,t89c,c96a,g145a,c174t,g237c,i127a;LP=382;RP=423;RA=-0.147;PRIOR=false;SR=407;AF=0.0186246;AC=26;GENE=CASZ1	0.0135783	0.0186246	.	0.0390273	.	.	.
1	10952198	ALU	TSD=AAGAATAGAAAGACC;ASSESS=5;INTERNAL=C1orf127,INTRONIC;SVTYPE=ALU;SVLEN=248;MEINFO=AluYb8,33,281,+;DIFF=1:g9a,c57t,c64t,c98a,t144c,g211a,c236t,c248g,i252gcagtcc,g253a,a252g;LP=10;RP=17;RA=-0.766;PRIOR=false;SR=11;AF=0.000150105;AC=1	.	.	.	0.000150105	.	.	.
1	10972420	ALU	TSD=null;ASSESS=3;INTERNAL=NM_001170754,INTRONIC;SVTYPE=ALU;SVLEN=203;MEINFO=AluSz,78,281,+;DIFF=1:g5a,g6a,g9a,c20t,c57t,t65g,i129a,g140a,c151t,c153g,g154a,c155t,g208a,g215a,g232a,g238a,c239t,g262a,c269t;LP=73;RP=74;RA=-0.02;PRIOR=false;SR=9;AF=0.000868056;AC=1	.	.	.	.	.	0.000868056	.
1	10976715	ALU	TSD=AAAAAAAAAAAAAAA;ASSESS=5;INTERNAL=NM_001170754,INTRONIC;SVTYPE=ALU;SVLEN=279;MEINFO=AluSc,1,280,+;DIFF=0.94:c4t,d65-66,t78a,g88t,i129a,c153g,c155t,g208a,g215a,c231t,c237t,a273t,g278a;LP=54;RP=60;RA=-0.152;PRIOR=false;SR=23;AF=0.0946181;AC=109	.	.	.	.	.	0.0946181	.
1	10987533	ALU	TSD=AAAGAAAGAAAGAAAGAAAGAA;ASSESS=5;INTERNAL=NM_001170754,PROMOTER;SVTYPE=ALU;SVLEN=279;MEINFO=AluSc,1,280,-;DIFF=0.99:c53t,c57t,g58a,d65-66,g67a,g70t,t78a,g88t,c111t,i129a,c139t,c143t,c151t,a163g,g176a,c197t,c231t,c239t,g270a,c277t,g278a;LP=59;RP=64;RA=-0.117;PRIOR=false;SR=151;AF=0.0924069;AC=129	0.0872604	0.0924069	0.0759892	.	.	0.129565	.
1	10997298	ALU	TSD=ATATATATATATATATA;ASSESS=5;INTERNAL=null,null;SVTYPE=ALU;SVLEN=279;MEINFO=AluSz,1,280,+;DIFF=0.87:c57t,t65g,i129a,c153g,g156a,c175t,g208a,g219a,g232a,g238a,g260a,d277-282;LP=33;RP=50;RA=-0.599;PRIOR=false;SR=26;AF=0.000199681;AC=1	0.000199681	.	.	.	.	.	.
1	11006562	SVA	TSD=AAAAATAAAACAAAAAAATTA;ASSESS=5;INTERNAL=NM_007375,PROMOTER;SVTYPE=SVA;SVLEN=785;MEINFO=SVA,531,1316,+;DIFF=0.53:n1-470,t478a,a487c,g492a,c504t,g505a,g509a,a513g,n528,c538t,a561c,t564c,c569t,a578g,t580c,t582c,a594t,g632a,n638-663,a668g,t703a,g717a,g730a,g734a,c750t,g764c,a773g,c801g,a825g,a827g,a836g,a838g,g840t,g880c,a886g,g898a,t922g,n927-971,g1009t,n1018,c1019t,a1053g,g1067a,a1079g,c1129g,c…	0.000399361	0.000716332	.	.	.	.	.
1	11048249	ALU	TSD=TTTTTTTTTTTTT;ASSESS=5;INTERNAL=MASP2,PROMOTER;SVTYPE=ALU;SVLEN=279;MEINFO=AluYa4_2,1,280,+;DIFF=0.96:t89c,c96a,g145a,g237c;LP=68;RP=17;RA=2;PRIOR=false;SR=5;AF=0.00195137;AC=13	.	.	.	0.00195137	.	.	.
1	11051505	SVA	TSD=null;ASSESS=4;INTERNAL=NM_003132,TERMINATOR;SVTYPE=SVA;SVLEN=298;MEINFO=SVA,1017,1315,-;DIFF=0.21:n1-1016,a1053g,g1067a,a1079g,a1166g,t1267c,g1268a,g1310t;LP=19;RP=1;RA=4.248;PRIOR=false;SR=4;AF=0.000199681;AC=1	0.000199681	.	.	.	.	.	.
1	11065351	ALU	TSD=CTTTTCTGTCATTTTC;ASSESS=5;INTERNAL=NM_001001998,TERMINATOR;SVTYPE=ALU;SVLEN=279;MEINFO=AluYb,1,280,+;DIFF=1:g54a,c64t,c98a,c126t,t144c,g211a,c236t,g277a;LP=17;RP=45;RA=-1.404;PRIOR=false;SR=9;AF=0.000716332;AC=1	0.000199681	0.000716332	.	.	.	.	.
1	11076179	LINE1	TSD=AAAAAACCAAACCA;ASSESS=5;INTERNAL=NM_001001998,INTRONIC;SVTYPE=LINE1;SVLEN=6018;MEINFO=L1Ta1d,1,6019,+;DIFF=0.06:n1,t231c,t254a,n349-6019;LP=8;RP=3;RA=1.415;ISTP=0;PRIOR=false;SR=4;GENE=EXOSC10;AF=0.000199681;AC=1	0.000199681	.	.	.	.	.	.
1	11083585	LINE1	TSD=AAAAAAAAAAAAAAAAAAAAAAA;ASSESS=5;INTERNAL=EXOSC10,INTRONIC;SVTYPE=LINE1;SVLEN=422;MEINFO=L1Ambig,5596,6018,-;DIFF=0:n1-5595,g5661t,t5685c,t5700g,a5712t,n5740-6019;LP=5;RP=1;RA=2.322;ISTP=0;PRIOR=false;SR=12;GENE=EXOSC10;AF=0.00494604;AC=11	.	.	0.00494604	.	.	.	.
1	11089227	LINE1	TSD=null;ASSESS=2;INTERNAL=EXOSC10,INTRONIC;SVTYPE=LINE1;SVLEN=4577;MEINFO=L1Ambig,1441,6018,-;DIFF=0.02:n1-1440,g1492a,g1504a,c1517g,g1536a,n1592-6019;LP=3;RP=1;RA=1.585;ISTP=-1;PRIOR=false;SR=0;AF=0.0174122;AC=116	.	.	.	0.0174122	.	.	.
1	11091022	ALU	TSD=null;ASSESS=3;INTERNAL=EXOSC10,EXON_5;SVTYPE=ALU;SVLEN=274;MEINFO=AluY,6,280,+;DIFF=0.69:g54a,c57t,c78t,c84t,t86g,g91a,t93c,c98t,t101a,g148a,c236t,t274a,c276t;LP=8;RP=16;RA=-1;PRIOR=false;SR=14;AF=2.01471e-05;AC=2	.	.	.	.	.	.	2.01471e-05
1	11109993	ALU	TSD=null;ASSESS=3;INTERNAL=NM_004958,INTRONIC;SVTYPE=ALU;SVLEN=279;MEINFO=AluY,1,280,+;DIFF=0.93:c48t,c57t,t86g,c98t,g110a,g175a,c206t,c260t,g265a,c268t,g269a;LP=27;RP=35;RA=-0.374;PRIOR=false;SR=4;AF=0.000868056;AC=1	.	.	.	.	.	0.000868056	.
1	11137175	ALU	TSD=AAAAAAAAAAAAAAAAAAAAAAA;ASSESS=5;INTERNAL=NM_004958,INTRONIC;SVTYPE=ALU;SVLEN=279;MEINFO=AluSz,1,280,+;DIFF=0.96:g5a,c57t,t65g,t78a,i129a,c153g,a163g,g198a,g219c,c239t,g262a,c269t,g278a;LP=65;RP=52;RA=0.322;PRIOR=false;SR=14;AF=0.0520833;AC=60	.	.	.	.	.	0.0520833	.
1	11152441	ALU	TSD=AAAAAGCTTAGG;ASSESS=5;INTERNAL=NM_004958,INTRONIC;SVTYPE=ALU;SVLEN=279;MEINFO=AluYf1,2,281,+;DIFF=1:g99a,t124a,i127aca,c156t,t173g;LP=229;RP=243;RA=-0.086;PRIOR=false;SR=220;AF=0.0121777;AC=17;GENE=MTOR	0.00978434	0.0121777	.	0.02852	.	0.000868056	.
1	11183659	ALU	TSD=AAGAAATCTTTGC;ASSESS=5;INTERNAL=NM_004958,INTRONIC;SVTYPE=ALU;SVLEN=281;MEINFO=AluYa4_2,0,281,+;DIFF=1:t89c,c96a,g145a,g237c;LP=20;RP=9;RA=1.152;PRIOR=false;SR=8;AF=0.000716332;AC=1;GENE=MTOR	.	0.000716332	.	.	.	.	.
1	11184203	ALU	TSD=null;ASSESS=4;INTERNAL=NM_004958,INTRONIC;SVTYPE=ALU;SVLEN=279;MEINFO=AluYa5,1,280,-;DIFF=1:t89c,c96a,g145a,c174t,c230t,g237c;LP=28;RP=27;RA=0.052;PRIOR=false;SR=12;AF=0.000199681;AC=1	0.000199681	.	.	0.000750525	.	.	.
1	11186739	ALU	TSD=AAACAAGGACTTCTTTTT;ASSESS=5;INTERNAL=NM_004958,INTRONIC;SVTYPE=ALU;SVLEN=280;MEINFO=AluYb8,1,281,-;DIFF=1:c57t,c64t,c98a,t144c,g211a,c236t,i252gcagtcc,c248g,a252g;LP=24;RP=59;RA=-1.298;PRIOR=false;SR=17;AF=0.000716332;AC=1;GENE=MTOR	0.000399361	0.000716332	.	0.00060042	.	.	.
1	11214480	ALU	TSD=AAAAGTTCTGG;ASSESS=5;INTERNAL=NM_004958,INTRONIC;SVTYPE=ALU;SVLEN=280;MEINFO=AluYa1_1,1,281,+;DIFF=1:g145a,g208a,c236t;LP=39;RP=43;RA=-0.141;PRIOR=false;SR=46;AF=0.002149;AC=3;GENE=MTOR	0.00339457	0.002149	.	0.00855599	0.00793651	.	.
1	11239516	ALU	TSD=null;ASSESS=3;INTERNAL=NM_004958,INTRONIC;SVTYPE=ALU;SVLEN=279;MEINFO=AluY,1,280,+;DIFF=0.98:g11a,g65a,c98t,g139a,g237a,c238t,c260t,g269a;LP=13;RP=29;RA=-1.158;PRIOR=false;SR=7;AF=0.002149;AC=3;GENE=MTOR	0.00199681	0.002149	.	0.00390273	.	.	.
1	11239533	LINE1	TSD=AAAAGTATCAACTTCTC;ASSESS=5;INTERNAL=NM_004958,INTRONIC;SVTYPE=LINE1;SVLEN=294;MEINFO=L1Ta,5725,6019,+;DIFF=0.05:n1-5725;LP=280;RP=355;RA=-0.342;ISTP=0;PRIOR=false;SR=502;AF=0.0243553;AC=34;GENE=MTOR	0.0179712	0.0243553	.	0.0417292	0.00793651	0.00607639	.
1	11252252	ALU	TSD=AAAAATTTGTATTATC;ASSESS=5;INTERNAL=MTOR,INTRONIC;SVTYPE=ALU;SVLEN=281;MEINFO=AluYc1,0,281,+;DIFF=1:c4t,i127aa,g148a,c206t,g224c;LP=14;RP=6;RA=1.222;PRIOR=false;SR=13;AF=0.000150105;AC=1	.	.	.	0.000150105	.	.	.
1	11253705	ALU	TSD=AGAACTTGCTGCTATCTGA;ASSESS=5;INTERNAL=MTOR,INTRONIC;SVTYPE=ALU;SVLEN=281;MEINFO=AluYb6_2,0,281,+;DIFF=0.64:c57t,c64t,c98a,i127aa,t144c,g211a,c236t,c248g,a252c;LP=7;RP=98;RA=-3.807;PRIOR=false;SR=18;AF=0.000607684;AC=59	.	.	.	0.000150105	.	.	0.000607684
1	11259587	ALU	TSD=AGAAAGCCTAGATTC;ASSESS=5;INTERNAL=MTOR,INTRONIC;SVTYPE=ALU;SVLEN=281;MEINFO=AluYa4_4,0,281,+;DIFF=1:c96a,g145a,c174t,g214a,g237c,c254t;LP=32;RP=26;RA=0.3;PRIOR=false;SR=49;AF=0.000450315;AC=3	.	.	.	0.000450315	.	.	.
1	11264890	ALU	TSD=AAATAAATAAATAAATAAACAAATAAA;ASSESS=5;INTERNAL=NM_013319,PROMOTER;SVTYPE=ALU;SVLEN=279;MEINFO=AluSc,1,280,-;DIFF=0.96:c4t,c8t,g21a,c48t,c53t,g54a,d65-66,t78a,g112a,i129a,g152a,c153g,c155t,a163g,c197t,c214t,g240a,c247t,c249t,a253t,c261g,g270a,g278a;LP=46;RP=31;RA=0.569;PRIOR=false;SR=255;AF=0.00954861;AC=11	0.000199681	.	.	.	.	0.00954861	.
1	11375188	SVA	TSD=null;ASSESS=4;INTERNAL=null,null;SVTYPE=SVA;SVLEN=1240;MEINFO=SVA,75,1315,-;DIFF=0.25:n1-865,g880c,a886g,g898a,t922g,a931g,a934t,g938a,c945a,g1009t,c1019t,a1053g,g1067a,a1079g,c1129g,n1258-1268,t1292c,n1307-1308;LP=9;RP=1;RA=3.17;PRIOR=false;SR=4;AF=0.000716332;AC=1;GENE=LOC105376740	.	0.000716332	.	.	.	.	.
1	11404533	ALU	TSD=null;ASSESS=3;INTERNAL=null,null;SVTYPE=ALU;SVLEN=279;MEINFO=AluY,1,280,-;DIFF=0.9:g5a,g11a,c20t,c57a,g58a,c64t,g65a,g67a,g68a,g72a,g79a,g99a,c138t,g151a,g175a,c206t,g237a,c260t;LP=55;RP=96;RA=-0.804;PRIOR=false;SR=50;AF=0.000868056;AC=1	.	.	.	.	.	0.000868056	.
1	11423878	ALU	TSD=TTTTTTTTTTTTTTTTTTTTTTTTT;ASSESS=5;INTERNAL=DISP3,PROMOTER;SVTYPE=ALU;SVLEN=279;MEINFO=AluY,1,280,-;DIFF=0.5:g21a,c57t,i64tg,c64t,g72a,c78t,t93c,c98t,g102a,c142t,g145a,g148a,c150t,c154t,t158a,g162a;LP=6;RP=4;RA=0.585;PRIOR=false;SR=2;AF=0.123837;AC=825	.	.	.	0.123837	.	.	.
1	11595750	ALU	TSD=GACAAATTAAATATT;ASSESS=5;INTERNAL=LINC01647,PROMOTER;SVTYPE=ALU;SVLEN=280;MEINFO=AluYb6_2,1,281,-;DIFF=1:c57t,c64t,c98a,t144c,c206t,g211a,c236t,c238t,c276t;LP=44;RP=34;RA=0.372;PRIOR=false;SR=46;AF=0.00360252;AC=24	.	.	.	0.00360252	.	.	.
1	11638937	ALU	TSD=null;ASSESS=4;INTERNAL=FBXO2,TERMINATOR;SVTYPE=ALU;SVLEN=63;MEINFO=AluSz,218,281,-;DIFF=0.99:g5a,g9a,c10t,c20t,c53t,t65g,i129a,c139t,g152a,c153g,a163g,c197g,t200g,c214t,g238a,g262a,c269t;LP=7;RP=11;RA=-0.652;PRIOR=false;SR=10;AF=0.0134892;AC=30	.	.	0.0134892	.	.	.	.
1	11668157	ALU	TSD=AAAATAACAATCACCA;ASSESS=5;INTERNAL=NM_018438,INTRONIC;SVTYPE=ALU;SVLEN=279;MEINFO=AluY,1,280,+;DIFF=1:g54a,c276t;LP=68;RP=81;RA=-0.252;PRIOR=false;SR=14;AF=0.000199681;AC=1	0.000199681	.	.	.	.	.	.
1	11686831	ALU	TSD=AAAAAAAAAAAAAAAAAAAAAAAA;ASSESS=5;INTERNAL=NM_001127325,INTRONIC;SVTYPE=ALU;SVLEN=279;MEINFO=AluY,1,280,-;DIFF=1:c20t,c98t,g139a,c150t,g196t,g199t,g207a;LP=46;RP=46;RA=0;PRIOR=false;SR=17;AF=0.00173611;AC=2	.	.	.	.	.	0.00173611	.
1	11749267	ALU	TSD=CCTTTCTCTCTCTCT;ASSESS=5;INTERNAL=NM_001040194,INTRONIC;SVTYPE=ALU;SVLEN=278;MEINFO=AluYa5,3,281,-;DIFF=1:c57t,t89c,c96a,g145a,c174t,g237c;LP=5;RP=17;RA=-1.766;PRIOR=false;SR=6;AF=0.000868056;AC=1	.	.	.	.	.	0.000868056	.
1	11770163	ALU	TSD=TAAATTTTTCTT;ASSESS=5;INTERNAL=NM_001010881,INTRONIC;SVTYPE=ALU;SVLEN=279;MEINFO=AluY,1,280,-;DIFF=0.87:c10t,g11a,c48a,c57t,c64t,c150t,c276t;LP=54;RP=35;RA=0.626;PRIOR=false;SR=70;AF=0.0222063;AC=31;GENE=C1orf167	0.0307508	0.0222063	0.00629496	0.0231162	0.00793651	0.0130208	.
1	11770163	SVA	TSD=null;ASSESS=4;INTERNAL=NM_001010881,INTRONIC;SVTYPE=SVA;SVLEN=1240;MEINFO=SVA,75,1315,+;DIFF=0.41:n1-884,a935g,g938a,c945a,g949c,t970c,t985c,g1009t,c1037t,a1053g,a1061g,g1067a,g1072a,a1079g,g1082a,a1102g,c1129g,a1132g,a1133g,c1144a,c1146a,a1159g,c1163a,c1164t,a1174g,a1207g,a1238g,a1260g,t1267c,g1310t;LP=2061;RP=1673;RA=0.301;PRIOR=false;SR=1350;AF=0.0952722;AC=133;GENE=C1orf167	0.108427	0.0952722	0.0445144	0.0960672	0.0714286	0.0963542	.
1	11808696	ALU	TSD=CTTCTTCCTTCATCTTTTTTTTTTTTTT;ASSESS=5;INTERNAL=NM_001286,INTRONIC;SVTYPE=ALU;SVLEN=279;MEINFO=AluSc,1,280,-;DIFF=0.94:g5a,c57t,d65-66,t78a,g88t,i129a,g144a,c153g,c207t,g215a,c239t,c261t,c269t,d277-282;LP=39;RP=28;RA=0.478;PRIOR=false;SR=9;AF=0.00347222;AC=4	.	.	.	.	.	0.00347222	.
1	11860509	ALU	TSD=AAGAAACTGGGACCTC;ASSESS=5;INTERNAL=NM_002521,PROMOTER;SVTYPE=ALU;SVLEN=281;MEINFO=AluYa4_5,0,281,+;DIFF=1:t89c,c96a,g145a,c174t,c236t;LP=546;RP=554;RA=-0.021;PRIOR=false;SR=656;AF=0.0229226;AC=32	0.0171725	0.0229226	.	0.0493846	.	.	.
1	11877109	ALU	TSD=null;ASSESS=4;INTERNAL=null,null;SVTYPE=ALU;SVLEN=279;MEINFO=AluSz,1,280,-;DIFF=0.76:c4t,c10t,c57t,t65g,c80t,i129a,c143t,g152a,c153g,c155t,c175t,g176a,c197g,t200g,g208a,g215a,c242t,c244t,c255t,g270a,t275c;LP=42;RP=48;RA=-0.193;PRIOR=false;SR=7;AF=0.000868056;AC=1	.	.	.	.	.	0.000868056	.
1	11877136	ALU	TSD=null;ASSESS=4;INTERNAL=NPPB,PROMOTER;SVTYPE=ALU;SVLEN=89;MEINFO=AluY,192,281,+;DIFF=0:c57t,c64t,g99a,g110a,c138t,c150t,g152c,g153a,c154t,g261a,g269a,c276t;LP=3;RP=2;RA=0.585;PRIOR=false;SR=1;AF=0.000750525;AC=5	.	.	.	0.000750525	.	.	.
1	11903490	SVA	TSD=null;ASSESS=3;INTERNAL=NR_002754,PROMOTER;SVTYPE=SVA;SVLEN=369;MEINFO=SVA,946,1315,+;DIFF=0.24:n1-945,g1009t,c1019t,a1041g,a1053g,g1067a,a1068g,a1079g,a1102g,a1116g,c1129g,a1132g,c1157t,a1178g,g1268a,t1292c;LP=1;RP=15;RA=-3.907;PRIOR=false;SR=9;AF=0.000716332;AC=1	.	0.000716332	.	.	.	.	.
1	11981932	ALU	TSD=TTTTTTTTTTTT;ASSESS=5;INTERNAL=MFN2,INTRONIC;SVTYPE=ALU;SVLEN=279;MEINFO=AluY,1,280,-;DIFF=0.69:c8t,c20a,c48t,c98t,c142t,g151a,c154t,g196c,c198t,g199t,c206t,c218g,g239a,c251t,c260t,c268t,c276t,d280-281,a252g;LP=10;RP=8;RA=0.322;PRIOR=false;SR=16;GENE=MFN2;AF=0.0791367;AC=176	.	.	0.0791367	.	.	.	.
1	11984684	ALU	TSD=AAAACCCTCCCCT;ASSESS=5;INTERNAL=MFN2,INTRONIC;SVTYPE=ALU;SVLEN=265;MEINFO=AluYa,16,281,+;DIFF=0.94:g145a;LP=64;RP=44;RA=0.541;PRIOR=false;SR=69;AF=0.00090063;AC=6	.	.	.	0.00090063	.	.	.
1	11988420	ALU	TSD=TTTTTTTTTTTTTTTTT;ASSESS=5;INTERNAL=NM_014874,INTRONIC;SVTYPE=ALU;SVLEN=279;MEINFO=AluSz,1,280,-;DIFF=1:g5a,g9a,c10t,c20t,g49a,c53t,g58a,t65g,g81a,i129a,g140a,g152a,c153g,a163g,c197t,g219c,c261t;LP=85;RP=84;RA=0.017;PRIOR=false;SR=9;AF=0.000868056;AC=1	.	.	.	.	.	0.000868056	.
1	11993994	SVA	TSD=null;ASSESS=4;INTERNAL=NM_014874,INTRONIC;SVTYPE=SVA;SVLEN=336;MEINFO=SVA,979,1315,-;DIFF=0.25:n1-978,g1009t,a1053g,g1067a,a1079g,c1129g,g1136a,t1244c,g1245a,g1268a,t1292c;LP=10;RP=1;RA=3.322;PRIOR=false;SR=3;GENE=MFN2;AF=0.000199681;AC=1	0.000199681	.	.	.	.	.	.
1	12006226	ALU	TSD=ACGACTATTTT;ASSESS=5;INTERNAL=NM_014874,INTRONIC;SVTYPE=ALU;SVLEN=280;MEINFO=AluYc1,1,281,-;DIFF=1:c92g,g99a,g148a;LP=104;RP=89;RA=0.225;PRIOR=false;SR=116;AF=0.00501433;AC=7;GENE=MFN2	0.0121805	0.00501433	.	.	.	.	.
1	12011474	ALU	TSD=null;ASSESS=3;INTERNAL=MFN2,INTRONIC;SVTYPE=ALU;SVLEN=268;MEINFO=AluY,12,280,+;DIFF=0.51:c20t,c57t,g143a;LP=1;RP=13;RA=-3.7;PRIOR=false;SR=3;AF=1.00735e-05;AC=1	.	.	.	.	.	.	1.00735e-05
1	12015578	SVA	TSD=null;ASSESS=4;INTERNAL=NM_021933,PROMOTER;SVTYPE=SVA;SVLEN=1240;MEINFO=SVA,75,1315,-;DIFF=0.35:n1-765,a773g,g820a,c822t,g840c,n871,n897,n912,n916,n921-922,n924,n930-931,n934,n937,n940-941,n945,g1009t,g1051a,a1053g,a1079g,c1081t,c1129a,c1190t,d1232,n1235,t1292c;LP=45;RP=9;RA=2.322;PRIOR=false;SR=17;AF=0.000399361;AC=2	0.000399361	.	.	0.000150105	.	.	.
1	12043766	ALU	TSD=null;ASSESS=3;INTERNAL=null,null;SVTYPE=ALU;SVLEN=279;MEINFO=AluY,1,280,-;DIFF=0.99:c57t,c98t,c150t,g151a,g152c,c154t,g196c,g197a,g199t,g207a,g214a,c218g;LP=94;RP=124;RA=-0.4;PRIOR=false;SR=46;AF=0.00173611;AC=2	.	.	.	0.000150105	.	0.00173611	.
1	12059878	ALU	TSD=AAGAGTCCCATGA;ASSESS=5;INTERNAL=NM_001281430,PROMOTER;SVTYPE=ALU;SVLEN=248;MEINFO=AluYb3a1,33,281,+;DIFF=1:c4t,g9a,c57t,c64t,t144c,c174g,g211a,c236t,i252gcagtcc,c248g,a252g;LP=39;RP=43;RA=-0.141;PRIOR=false;SR=12;AF=0.000199681;AC=1	0.000199681	.	.	.	.	.	.
1	12114705	SVA	TSD=null;ASSESS=3;INTERNAL=NM_001281430,INTRONIC;SVTYPE=SVA;SVLEN=1240;MEINFO=SVA,75,1315,+;DIFF=0.34:n1-74,a78c,c122t,c126t,c158t,a167g,g192c,t193c,c201t,t202g,c205t,a218g,g219a,t221a,g225a,a231g,c232t,t236c,g250a,c253t,t258a,g271t,c277t,n322,t324c,n326,a327g,c361t,t366c,c386t,n390-1316;LP=9;RP=20;RA=-1.152;PRIOR=false;SR=2;GENE=TNFRSF8;AF=0.0217652;AC=109	0.0217652	.	.	.	.	.	.
1	12192163	ALU	TSD=null;ASSESS=1;INTERNAL=TNFRSF1B,INTRONIC;SVTYPE=ALU;SVLEN=279;MEINFO=AluY,1,280,+;DIFF=0.64:c8t,g11a,c20t,c23t,c48t,g49t,c53t,g56a,c57t,g58a,c62t,g65c,g151a,c154t,g162a,c230t,g258a,g261a,a272t;LP=5;RP=3;RA=0.737;PRIOR=false;SR=0;AF=1.27737e-05;AC=1	.	.	.	.	.	.	1.27737e-05
1	12232662	ALU	TSD=null;ASSESS=4;INTERNAL=VPS13D,INTRONIC;SVTYPE=ALU;SVLEN=279;MEINFO=AluY,1,280,-;DIFF=0.03:g9a,c20t,g25a,g58a,c78t,c98t,c107g,c138t,t144c,g151a,g212a,c213t,c218g;LP=2;RP=3;RA=-0.585;PRIOR=false;SR=1;AF=0.00780546;AC=52	.	.	.	0.00780546	.	.	.
1	12242652	ALU	TSD=null;ASSESS=4;INTERNAL=VPS13D,INTRONIC;SVTYPE=ALU;SVLEN=281;MEINFO=AluYg,0,281,+;DIFF=0.43:g52a,g54a,g58a;LP=7;RP=1;RA=2.807;PRIOR=false;SR=4;AF=2.01487e-05;AC=2	.	.	.	.	.	.	2.01487e-05
1	12302876	ALU	TSD=null;ASSESS=4;INTERNAL=VPS13D,INTRONIC;SVTYPE=ALU;SVLEN=273;MEINFO=AluSz,7,280,-;DIFF=0.53:g152t,c153g,a163g,c175t,g238c;LP=4;RP=2;RA=1;PRIOR=false;SR=1;AF=0.002852;AC=19	.	.	.	0.002852	.	.	.
1	12325976	ALU	TSD=null;ASSESS=3;INTERNAL=NM_018156,INTRONIC;SVTYPE=ALU;SVLEN=279;MEINFO=AluY,1,280,+;DIFF=0.99:c4t,g5a,t93c,c98t,c154t,g196t,g199t,c206t,c218g,g226t,c230a,g261a;LP=19;RP=43;RA=-1.178;PRIOR=false;SR=6;AF=0.0113043;AC=13	.	.	.	.	.	0.0113043	.
1	12350994	SVA	TSD=null;ASSESS=3;INTERNAL=NM_018156,INTRONIC;SVTYPE=SVA;SVLEN=1240;MEINFO=SVA,75,1315,+;DIFF=0.36:n1-840,g880c,a886g,g898a,c920g,t922g,a931g,a934t,g938a,c945a,g1009t,c1019t,a1053g,g1067a,a1079g,c1129g,c1157t,g1268a,t1292c;LP=1;RP=18;RA=-4.17;PRIOR=false;SR=4;AF=0.000716332;AC=1;GENE=VPS13D	0.000199681	0.000716332	.	.	.	.	.
1	12360046	ALU	TSD=AGAACCACAGAATTCTT;ASSESS=5;INTERNAL=NM_018156,INTRONIC;SVTYPE=ALU;SVLEN=76;MEINFO=AluYa5,205,281,-;DIFF=0.83:g5a,t89c,c96a,g145a,c174t,g199a,g237c;LP=15;RP=4;RA=1.907;PRIOR=false;SR=19;AF=0.000199681;AC=1	0.000199681	.	.	.	.	.	.
1	12385463	LINE1	TSD=TCTGTTTTCTTTCT;ASSESS=5;INTERNAL=NM_018156,INTRONIC;SVTYPE=LINE1;SVLEN=1069;MEINFO=L1Ambig,4950,6019,-;DIFF=0.05:n1-4947,c5109t,t5160c,n5236-5237,n5239-5240,n5248,n5251-5255,n5260-5263,n5265,n5268,n5270,n5274,n5279,n5282,n5286,n5288-5289,n5292-5294,n5297,n5303,n5309-5310,n5313,n5315,n5317,n5321,n5326,n5329,n5331,n5333-5335,n5338,n5342,n5346,n5349,n5365,n5378-6019;LP=1;RP=18;RA=-4.17;ISTP=0;PR…	0.000199681	.	.	.	.	.	.
1	12415613	SVA	TSD=GAACTTGAAATTTTTT;ASSESS=5;INTERNAL=NM_018156,INTRONIC;SVTYPE=SVA;SVLEN=1240;MEINFO=SVA,75,1315,-;DIFF=0.33:n1-875,g921a,c945a,g1009t,g1051a,a1053g,a1079g,c1081t,c1129g,c1190t,d1232-1234,t1292c;LP=761;RP=130;RA=2.549;PRIOR=false;SR=472;AF=0.0365329;AC=51;GENE=VPS13D	0.033746	0.0365329	0.00404676	0.00435305	0.031746	.	.
1	12420151	ALU	TSD=GACCACTTCTT;ASSESS=5;INTERNAL=VPS13D,INTRONIC;SVTYPE=ALU;SVLEN=281;MEINFO=AluYb6_2,0,281,-;DIFF=1:c57t,c64t,c98a,t144c,g211a,c218t,c236t,c248g,a252g;LP=12;RP=8;RA=0.585;PRIOR=false;SR=13;AF=0.000150105;AC=1	.	.	.	0.000150105	.	.	.
1	12526624	LINE1	TSD=TAAAATTGTC;ASSESS=5;INTERNAL=null,null;SVTYPE=LINE1;SVLEN=6019;MEINFO=L1Ta1d,0,6019,+;DIFF=0.06:n1-2,g67t,t231c,t254a,g328a,a373g,n433,n438,n468,g483a,n490-6019;LP=20;RP=1;RA=4.322;ISTP=0;PRIOR=false;SR=8;AF=0.000716332;AC=1;GENE=LOC105376744	.	0.000716332	.	.	.	.	.
1	12532350	ALU	TSD=GTTTTGGCTTCCTGTATTTTTTTTTTTTTTT;ASSESS=5;INTERNAL=null,null;SVTYPE=ALU;SVLEN=279;MEINFO=AluSz,1,280,+;DIFF=0.98:c10t,t65g,i129a,g152a,c153g,a163g,g219c,g232a,c237t,g238a,c239t,g240a,g262a,g270a,c277t;LP=71;RP=57;RA=0.317;PRIOR=false;SR=17;AF=0.00260417;AC=3	.	.	.	.	.	0.00260417	.
1	12534901	SVA	TSD=null;ASSESS=4;INTERNAL=null,null;SVTYPE=SVA;SVLEN=612;MEINFO=SVA,703,1315,-;DIFF=0.27:n1-702,n721,t729c,g764c,a773g,a814g,g840c,t847g,t862c,g880c,g938a,c945a,t970c,t985c,g1009t,a1053g,g1064a,g1067a,a1079g,n1089-1316;LP=19;RP=1;RA=4.248;PRIOR=false;SR=9;AF=0.000199681;AC=1	0.000199681	.	.	.	.	.	.
1	12606329	ALU	TSD=AAAAAAAAAAAAAAAAAA;ASSESS=5;INTERNAL=NM_004753,INTRONIC;SVTYPE=ALU;SVLEN=279;MEINFO=AluY,1,280,+;DIFF=0.88:c4t,c20t,g54a,g151a,g152c,c154t,c218g,g231a,g237a,g239a,g269a;LP=113;RP=138;RA=-0.288;PRIOR=false;SR=111;AF=0.0746528;AC=86	.	.	.	.	.	0.0746528	.
1	12614723	ALU	TSD=null;ASSESS=4;INTERNAL=NM_004753,INTRONIC;SVTYPE=ALU;SVLEN=279;MEINFO=AluY,1,280,-;DIFF=1:c20t,g58a,i65gt,a76t,t86g,g91a,t93c,c98t,c109t,g136t,g139a,g151a,c154t,c174t,g179a,g207a,c213t,g261a,g269a,c276t;LP=40;RP=65;RA=-0.7;PRIOR=false;SR=13;AF=0.00519169;AC=26	0.00519169	.	0.000899281	.	.	.	.
1	12638926	ALU	TSD=dCTCTTTCTTCTT;ASSESS=5;INTERNAL=AADACL4,PROMOTER;SVTYPE=ALU;SVLEN=279;MEINFO=AluSz,1,280,-;DIFF=0.76:c4t,c8t,g9a,c20t,g49a,c57t,t65g,g81a,g112a,i129a,g152a,g154a,g156a,a163g,c207t,c214t,g215a,g219c,g232a;LP=6;RP=14;RA=-1.222;PRIOR=false;SR=3;AF=0.000150105;AC=1	.	.	.	0.000150105	.	.	.
1	12677564	ALU	TSD=AAAAACAGCAAGTA;ASSESS=5;INTERNAL=null,null;SVTYPE=ALU;SVLEN=281;MEINFO=AluY,0,281,+;DIFF=1:c4t,c64t,i119aa,g146c,c154a,g155a,c206t,g231a,c236t,c238t,g261a,g269a,c276t;LP=2547;RP=2458;RA=0.051;PRIOR=false;SR=3309;AF=0.148281;AC=207	0.134585	0.148281	0.166367	0.244371	0.134921	0.0876736	.
1	12691867	ALU	TSD=AAAGAATACACTTGA;ASSESS=5;INTERNAL=null,null;SVTYPE=ALU;SVLEN=152;MEINFO=AluYb,129,281,+;DIFF=0.95:c48t,g49a,c53a,g54a,c57a,c64t,g67t,g68c,i119a,g211a,c236t,i252gcagtcc,c248g,a252g;LP=9;RP=35;RA=-1.959;PRIOR=false;SR=15;AF=0.000716332;AC=1	.	0.000716332	.	.	.	.	.
1	12718382	ALU	TSD=AAAAAAAAAAAAAAAAAAAAAAA;ASSESS=5;INTERNAL=NR_111984,INTRONIC;SVTYPE=ALU;SVLEN=279;MEINFO=AluSz,1,280,+;DIFF=1:g5a,g58a,c64t,t65g,g81a,g93a,c95t,g112a,i129a,c143t,c153g,c155t,a163g,g176a,c197t,g208a,c214t,g215a,c239t,c269t,g278a;LP=59;RP=46;RA=0.359;PRIOR=false;SR=28;AF=0.00347222;AC=4	.	.	.	.	.	0.00347222	.
1	12745324	ALU	TSD=null;ASSESS=4;INTERNAL=NM_152290,PROMOTER;SVTYPE=ALU;SVLEN=279;MEINFO=AluYb,1,280,+;DIFF=0.89:g5a,c8t,c48t,c53t,c98t,c138t,g151a,c174t,g214a,c230t,c236a,g237a,c238t,g239a,g261a,c263a;LP=21;RP=63;RA=-1.585;PRIOR=false;SR=18;AF=0.00143266;AC=2	.	0.00143266	.	.	.	.	.
1	12773660	SVA	TSD=null;ASSESS=4;INTERNAL=NM_001080830,PROMOTER;SVTYPE=SVA;SVLEN=501;MEINFO=SVA,814,1315,-;DIFF=0.27:n1-813,g840c,t847g,t862c,t863a,g880c,g938a,c945a,t970c,t985c,g1009t,a1053g,g1067a,a1079g,g1082a,c1129g,c1146a,c1163a,c1164t,a1193g,t1267c,g1268a,g1310t;LP=16;RP=1;RA=4;PRIOR=false;SR=7;AF=0.000716332;AC=1	0.000199681	0.000716332	.	.	.	.	.
1	12794574	ALU	TSD=AGAATGCATGTACTG;ASSESS=5;INTERNAL=NM_023013,INTRONIC;SVTYPE=ALU;SVLEN=280;MEINFO=AluYb8,1,281,+;DIFF=0.99:c57t,c64t,c98a,t144c,g211a,c236t,c248g,i252gcagtcc,g253a,a252g;LP=11;RP=7;RA=0.652;PRIOR=false;SR=12;AF=0.000199681;AC=1	0.000199681	.	.	0.000150105	.	.	.
1	12799532	ALU	TSD=null;ASSESS=4;INTERNAL=NM_001294139,TERMINATOR;SVTYPE=ALU;SVLEN=270;MEINFO=AluY,10,280,+;DIFF=0.83:g21a,i38t,g54a,c57t,c64t,c108t,i133t,c138t,c142t,g145t,g151a,g155a,g175t,g199a,g207a,g226t,g231a,g237a,g239a,g261a,a264t,g269a,c276t;LP=8;RP=14;RA=-0.807;PRIOR=false;SR=3;AF=0.0238095;AC=3	.	.	.	.	0.0238095	.	.
1	12799665	ALU	TSD=null;ASSESS=3;INTERNAL=NM_001294139,TERMINATOR;SVTYPE=ALU;SVLEN=270;MEINFO=AluY,10,280,-;DIFF=0.97:g21a,i38t,g54a,c57t,c64t,c108t,i133t,c138t,c142t,g145t,g151a,g155a,g175t,g199a,g207a,g226t,g231a,g237a,g239a,g261a,a264t,g269a,c276t;LP=64;RP=154;RA=-1.267;PRIOR=false;SR=50;AF=0.0243478;AC=28	.	.	0.0067446	0.0105074	.	0.0243478	.
1	12799674	ALU	TSD=GACTACACT;ASSESS=5;INTERNAL=NM_001294139,TERMINATOR;SVTYPE=ALU;SVLEN=270;MEINFO=AluY,10,280,+;DIFF=0.97:g21a,i38t,g54a,c57t,c64t,c108t,i133t,c138t,c142t,g145t,g151a,g155a,g175t,g199a,g207a,g226t,g231a,g237a,g239a,g261a,a264t,g269a,c276t;LP=80;RP=167;RA=-1.062;PRIOR=false;SR=82;AF=0.0243553;AC=34	0.0325479	0.0243553	.	.	.	.	.
1	12801860	ALU	TSD=null;ASSESS=1;INTERNAL=NM_001294139,TERMINATOR;SVTYPE=ALU;SVLEN=279;MEINFO=AluSz,1,280,-;DIFF=0.64:g5a,c8t,c47t,c53t,c57t,t65g,g88t,g112a,i129a,c139t,g144a,g152a,c155t,g156a,a163g,c167t,d197-282;LP=38;RP=8;RA=2.248;PRIOR=false;SR=0;AF=0.047619;AC=6	.	.	.	.	0.047619	.	.
1	12838042	ALU	TSD=AAATTAAATTAA;ASSESS=5;INTERNAL=NM_001146344,PROMOTER;SVTYPE=ALU;SVLEN=279;MEINFO=AluYa2,1,280,+;DIFF=1:t93c,c98t,g145a,c174t,c236t,c238t,g277a;LP=53;RP=41;RA=0.37;PRIOR=false;SR=51;AF=0.0026;AC=13	0.0026	.	.	.	.	.	.
1	12881899	ALU	TSD=AACAGAGTTCA;ASSESS=5;INTERNAL=NM_001009611,EXON_3;SVTYPE=ALU;SVLEN=281;MEINFO=AluYa5,0,281,+;DIFF=1:t89c,c96a,g145a,c174t,g237c,c255a;LP=486;RP=721;RA=-0.569;PRIOR=false;SR=568;AF=0.0360231;AC=50;GENE=PRAMEF4	0.0449078	0.0360231	0.0310252	0.0592838	0.0634921	0.0355903	0.0733106
1	12909548	ALU	TSD=null;ASSESS=3;INTERNAL=NM_001012277,PROMOTER;SVTYPE=ALU;SVLEN=278;MEINFO=AluYa,3,281,-;DIFF=0.61:c96a,i127aa,g196a,g208a,g237c;LP=2;RP=5;RA=-1.322;PRIOR=false;SR=8;AF=0.000868056;AC=1	.	.	.	.	.	0.000868056	.
1	13037931	SVA	TSD=null;ASSESS=4;INTERNAL=null,null;SVTYPE=SVA;SVLEN=374;MEINFO=SVA,941,1315,-;DIFF=0.22:n1-940,c945a,g1009t,c1019t,a1041g,a1053g,g1067a,a1068g,a1079g,a1102g,a1116g,c1129g,a1132g,c1157t,a1178g,g1268a,t1269c,t1292c;LP=36;RP=1;RA=5.17;PRIOR=false;SR=4;AF=0.0165468;AC=23	0.0106383	0.0165468	.	.	.	.	.
1	13110585	LINE1	TSD=null;ASSESS=3;INTERNAL=NM_001136561,TERMINATOR;SVTYPE=LINE1;SVLEN=3107;MEINFO=L1Ambig,2911,6018,+;DIFF=0.07:n1-5692,a5712g,c5744a,g5789a,a5803t,g5870t,c5878a,c5928g,a5929g,c5930a,a5931g,c5945t,g6014a;LP=30;RP=822;RA=-4.776;ISTP=0;PRIOR=false;SR=325;AF=0.0477431;AC=55	.	.	.	.	.	0.0477431	.
1	13119817	LINE1	TSD=null;ASSESS=4;INTERNAL=NM_001136561,PROMOTER;SVTYPE=LINE1;SVLEN=138;MEINFO=L1Ambig,5880,6018,-;DIFF=0.02:n1-5879,g5894a,g5903t,g5923a,c5928t,a5929g,c5930a,a5931g,g5935a,g5946a,g5952a,g6014a;LP=33;RP=1;RA=5.044;ISTP=0;PRIOR=false;SR=2;AF=0.0238095;AC=3	.	.	.	.	0.0238095	.	.
1	13233973	LINE1	TSD=null;ASSESS=3;INTERNAL=PRAMEF5,PROMOTER;SVTYPE=LINE1;SVLEN=432;MEINFO=L1Ambig,5586,6018,-;DIFF=0.01:n1-5585,c5590t,c5603t,n5615,i5617attggg,c5617t,a5618t,a5619t,c5620g,n5665-6019;LP=1;RP=11;RA=-3.459;ISTP=-1;PRIOR=false;SR=1;AF=0.000458575;AC=3	.	.	.	0.000458575	.	.	.
1	13242449	ALU	TSD=TTTTTTT;ASSESS=5;INTERNAL=null,null;SVTYPE=ALU;SVLEN=268;MEINFO=AluY,12,280,-;DIFF=0.96:g21a,g54a,c57t,a76t,c78t,t86g,t93c,c98t,g139a,g143a,c150t,c206t,g214a,c230t,c236t,c238t,c260t;LP=41;RP=40;RA=0.036;PRIOR=false;SR=16;AF=0.000716332;AC=1	0.000199681	0.000716332	.	.	.	.	.
1	13260768	ALU	TSD=null;ASSESS=4;INTERNAL=NM_001013407,EXON_3;SVTYPE=ALU;SVLEN=267;MEINFO=AluYa,13,280,-;DIFF=0.93:c22t,a76t,c98t,g145a,c174t,g237c,c255a;LP=60;RP=20;RA=1.585;PRIOR=false;SR=11;AF=0.0227987;AC=29;GENE=PRAMEF5	.	0.0227987	.	.	.	.	.
1	13349244	ALU	TSD=null;ASSESS=3;INTERNAL=PRAMEF14,PROMOTER;SVTYPE=ALU;SVLEN=279;MEINFO=AluSz,1,280,+;DIFF=0.93:g5a,g9a,g11a,g49a,c53t,c57t,c64t,t65g,c80t,c86t,i129a,g140a,c143a,g152a,g154a,c155t,g156a,c197a,g198a,c199t,g202a,c207t,g208a,c214t,g215c,g218a,g222a,c231t,g234t,c237t,c239t,g240a,g246a,c251t,c252t,c261t,g262a,c269g,d274-282;LP=1117;RP=461;RA=1.277;PRIOR=false;SR=89;AF=0.00150105;AC=10	.	.	0.000899281	0.00150105	.	.	.
1	13361096	ALU	TSD=null;ASSESS=3;INTERNAL=NM_001099790,TERMINATOR;SVTYPE=ALU;SVLEN=279;MEINFO=AluY,1,280,+;DIFF=1:c4t,g9a,g21a,g49a,g99a,c109t,c138t,g151a,c154t,g214a,g217c,g231a,g237a,g239a,g259a,c260t,g269a,i127a;LP=151;RP=299;RA=-0.986;PRIOR=false;SR=97;AF=0.0494269;AC=69	0.0752796	0.0494269	.	.	.	0.03125	.
1	13369583	LINE1	TSD=null;ASSESS=4;INTERNAL=PRAMEF19,EXON_3;SVTYPE=LINE1;SVLEN=5685;MEINFO=L1Ambig,333,6018,-;DIFF=0.07:n1-4118,c4158a,n4249,n4326-4405,n4410,n4452,c4458t,n4482-4804,t4857c,c4866t,a4898g,n4946,g4957a,c4977t,n4985-5130,t5160c,n5207-6019;LP=8;RP=18;RA=-1.17;ISTP=0;PRIOR=false;SR=16;AF=1.00746e-05;AC=1	.	.	.	.	.	.	1.00746e-05
1	13382061	ALU	TSD=null;ASSESS=4;INTERNAL=NM_001045480,PROMOTER;SVTYPE=ALU;SVLEN=279;MEINFO=AluY,1,280,+;DIFF=1:c4t,c10t,c20t,g49a,c57t,a76t,t86g,t93c,c98t,g151a,g162a,c230t,g237a;LP=14;RP=50;RA=-1.837;PRIOR=false;SR=12;AF=0.000399361;AC=2	0.000399361	.	.	.	.	.	.
1	13422824	ALU	TSD=null;ASSESS=3;INTERNAL=NM_001099852,TERMINATOR;SVTYPE=ALU;SVLEN=279;MEINFO=AluSg,1,280,+;DIFF=0.97:g25a,g49a,g54a,c57t,d65-66,g69a,c80t,g93a,c94t,g104c,c108g,c111t,a127g,i129a,g140a,g144a,g152a,c155t,c157t,g176a,g198a,g212a,c214t,g215a,g238a,c261a,g268a,c276t,d280-282;LP=132;RP=250;RA=-0.921;PRIOR=false;SR=130;AF=0.000199681;AC=1	0.000199681	.	.	.	.	.	.
1	13428070	ALU	TSD=AAAAAAAAAAAAA;ASSESS=5;INTERNAL=NM_001099852,TERMINATOR;SVTYPE=ALU;SVLEN=279;MEINFO=AluY,1,280,+;DIFF=1:c48t,c57t,c174t,g199t,g231a,c243t,c254t,t274a,g277a;LP=94;RP=135;RA=-0.522;PRIOR=false;SR=33;AF=0.00607639;AC=7	.	.	.	.	.	0.00607639	.
1	13445146	ALU	TSD=TTTTTTTTTTTTTTTTT;ASSESS=5;INTERNAL=null,null;SVTYPE=ALU;SVLEN=268;MEINFO=AluY,12,280,+;DIFF=0.89:g25a,c53t,g54a,c57t,g59a,c64t,a76t,g79a,c84t,c98t,g110a,c142t,g152c,c154t,g237a,c260t,i127a;LP=116;RP=127;RA=-0.131;PRIOR=false;SR=47;AF=0.00868056;AC=10	0.000199681	.	.	.	.	0.00868056	.
1	13481799	ALU	TSD=null;ASSESS=3;INTERNAL=NM_001010847,INTRONIC;SVTYPE=ALU;SVLEN=222;MEINFO=AluY,58,280,+;DIFF=0.8:c98t,c138t,c150t,c154t,g207a,c218t,c238t,g277a;LP=24;RP=58;RA=-1.273;PRIOR=false;SR=8;AF=0.00678914;AC=34	0.00678914	.	.	.	.	.	.
1	13527884	ALU	TSD=null;ASSESS=3;INTERNAL=null,null;SVTYPE=ALU;SVLEN=279;MEINFO=AluY,1,280,-;DIFF=0.95:g9t,c10t,c18t,c20t,g25a,c48t,c53t,c57t,g99a,g151a,t170c,c174g,c229g,c238t;LP=536;RP=1430;RA=-1.416;PRIOR=false;SR=3659;AF=0.343123;AC=479	0.336262	0.343123	.	0.374512	0.206349	0.222222	.
1	13612888	ALU	TSD=null;ASSESS=3;INTERNAL=NM_001006625,INTRONIC;SVTYPE=ALU;SVLEN=279;MEINFO=AluYb7_4,1,280,-;DIFF=0.9:c57t,c64t,c98a,t144c,g199c,c236t,i252gcagtcc,c248g,a252g;LP=13;RP=13;RA=0;PRIOR=false;SR=11;GENE=PDPN;AF=0.365079;AC=46	.	.	.	.	0.365079	.	.
1	13613536	ALU	TSD=CGGGGCTTGTTT;ASSESS=5;INTERNAL=NM_001006625,INTRONIC;SVTYPE=ALU;SVLEN=281;MEINFO=AluYb7_4,0,281,-;DIFF=1:c57t,c64t,c98a,t144c,g199c,c236t,i252gcagtcc,c248g,a252g;LP=299;RP=331;RA=-0.147;PRIOR=false;SR=442;AF=0.017192;AC=24;GENE=PDPN	0.0175719	0.017192	.	0.0621435	.	0.00694444	.
1	13617399	ALU	TSD=dTTTTGTGTGTGTG;ASSESS=5;INTERNAL=PDPN,3_UTR;SVTYPE=ALU;SVLEN=279;MEINFO=AluY,1,280,-;DIFF=0.72:g6a,g11a,c20t,c109t,c138t,c150t,c154t,g196t,g199a,c204a,c206t,c213t,g217t,c218g;LP=13;RP=6;RA=1.115;PRIOR=false;SR=19;AF=0.0927649;AC=618	.	.	.	0.0927649	.	.	.
1	13617423	ALU	TSD=TGTGAAACGTA;ASSESS=5;INTERNAL=NM_001006625,3_UTR;SVTYPE=ALU;SVLEN=82;MEINFO=AluSc,199,281,+;DIFF=0.97:g9a,d65-66,t78a,c80t,g88t,i129a,g152a,c153g,c155t,g156a,c197t,g208t,g215a,c231t,g232a,g238a,g240a,c269t,g270a;LP=87;RP=92;RA=-0.081;PRIOR=false;SR=9;AF=0.00954861;AC=11	.	.	.	.	.	0.00954861	.
1	13622053	ALU	TSD=dTAATAAT;ASSESS=5;INTERNAL=PDPN,TERMINATOR;SVTYPE=ALU;SVLEN=279;MEINFO=AluY,1,280,-;DIFF=0.88:g9a,g11a,g49a,g58a,g75a,c96a,c98t,c106t,c112t,c114t,a125g,g139a,g143a,g151a,g196c,g199t,c273t,g277a;LP=16;RP=19;RA=-0.248;PRIOR=false;SR=6;AF=0.000150105;AC=1	.	.	.	0.000150105	.	.	.
1	13649559	ALU	TSD=null;ASSESS=4;INTERNAL=null,null;SVTYPE=ALU;SVLEN=278;MEINFO=AluY,2,280,-;DIFF=0.96:g7c,c20t,c48t,c53t,c57t,i65gt,c70t,g79a,t86g,c98t,g139c,g143a,g151a,g199a,c238t,g239a;LP=104;RP=147;RA=-0.499;PRIOR=false;SR=28;AF=0.00347222;AC=4	.	.	.	.	.	0.00347222	.
1	13659194	SVA	TSD=AAAAAAAAAAAAAAAAAAAAAAAAAAAAA;ASSESS=5;INTERNAL=null,null;SVTYPE=SVA;SVLEN=342;MEINFO=SVA,973,1315,+;DIFF=0.2:n1-972,c991t,a1076g,a1079g,t1292c,g1293a;LP=31;RP=46;RA=-0.569;PRIOR=false;SR=90;AF=0.179313;AC=898	0.179313	.	.	.	.	.	.
1	13664392	SVA	TSD=null;ASSESS=3;INTERNAL=PRDM2,PROMOTER;SVTYPE=SVA;SVLEN=1240;MEINFO=SVA,75,1315,+;DIFF=0.25:n1-985,g1009t,a1053g,g1067a,a1079g,c1129g,c1146a,c1163a,c1164t,t1267c,g1268a,g1310t;LP=1;RP=24;RA=-4.585;PRIOR=false;SR=13;AF=0.00030021;AC=2	.	.	.	0.00030021	.	.	.
1	13690486	LINE1	TSD=TCTATAGCAGGGTTTT;ASSESS=5;INTERNAL=NM_001135610,PROMOTER;SVTYPE=LINE1;SVLEN=235;MEINFO=L1Ta,5784,6019,-;DIFF=0.04:n1-5782;LP=10;RP=5;RA=1;ISTP=0;PRIOR=false;SR=8;GENE=LOC105376756;AF=0.000199681;AC=1	0.000199681	.	.	.	.	.	.
1	13692521	ALU	TSD=AAAAAAAAAAAAAAAAAAAAA;ASSESS=5;INTERNAL=NM_001135610,PROMOTER;SVTYPE=ALU;SVLEN=279;MEINFO=AluY,1,280,-;DIFF=1:c4t,c98a,g155a,g199t;LP=97;RP=83;RA=0.225;PRIOR=false;SR=62;AF=0.00173611;AC=2	.	.	.	.	.	0.00173611	.
1	13714338	ALU	TSD=null;ASSESS=3;INTERNAL=PRDM2,INTRONIC;SVTYPE=ALU;SVLEN=216;MEINFO=AluYb,64,280,+;DIFF=0.37:t86g,t93c,c98t,g139a,g151a,g162a,c165t,g168c,c174a,g211a,t219a,g231a,c236t,c238t,c241a,c250a,g265a,c276t,a252g;LP=73;RP=106;RA=-0.538;PRIOR=false;SR=4;AF=0.000150105;AC=1	.	.	.	0.000150105	.	.	.
1	13714353	ALU	TSD=TTTTTTTTTTTTTTT;ASSESS=5;INTERNAL=NM_012231,INTRONIC;SVTYPE=ALU;SVLEN=279;MEINFO=AluY,1,280,+;DIFF=0.98:g5a,g9a,c10t,g11a,c20t,g42a,c48a,g49a,c53t,g54a,g56t,g58a,g68c,c109a,g143a,g199t,g207a,g214a,c238t,g277a;LP=107;RP=89;RA=0.266;PRIOR=false;SR=15;AF=0.000868056;AC=1	.	.	.	.	.	0.000868056	.
1	13746298	ALU	TSD=null;ASSESS=4;INTERNAL=NM_012231,INTRONIC;SVTYPE=ALU;SVLEN=279;MEINFO=AluSg,1,280,-;DIFF=0.98:c48t,c57t,d65-66,g88t,g93a,i129a,c153g,g219c,g262a,i265a,g272a,g278a;LP=32;RP=45;RA=-0.492;PRIOR=false;SR=4;AF=0.000199681;AC=1	0.000199681	.	.	.	.	.	.
1	13749488	LINE1	TSD=null;ASSESS=4;INTERNAL=PRDM2,INTRONIC;SVTYPE=LINE1;SVLEN=-1;MEINFO=L1Ambig,-1,6019,-;DIFF=0.04:n1-3748,g3754a,a3798g,n3825-3916,c3954t,g3984a,n3993-3996,t4001g,t4010a,a4107t,t4129a,n4132-6019;LP=4;RP=9;RA=-1.17;ISTP=4106;PRIOR=false;SR=16;AF=1.00735e-05;AC=1	.	.	.	.	.	.	1.00735e-05
1	13766803	ALU	TSD=AGTTTT;ASSESS=5;INTERNAL=NM_001007257,INTRONIC;SVTYPE=ALU;SVLEN=269;MEINFO=AluYa5,12,281,-;DIFF=0.96:g11a,t89c,c96a,g145a,c174t,g237c;LP=22;RP=28;RA=-0.348;PRIOR=false;SR=26;AF=0.000399361;AC=2	0.000399361	.	.	.	.	.	.
1	13777936	ALU	TSD=AAGAGGGAGAGAGG;ASSESS=5;INTERNAL=PRDM2,INTRONIC;SVTYPE=ALU;SVLEN=280;MEINFO=AluYa5,1,281,+;DIFF=1:t89c,c96a,g145a,c174t,g237c;LP=4;RP=11;RA=-1.459;PRIOR=false;SR=9;AF=0.000150105;AC=1	.	.	.	0.000150105	.	.	.
1	13793859	LINE1	TSD=AAAAAAAAAAGTTAGTGTTTTAA;ASSESS=5;INTERNAL=PRDM2,INTRONIC;SVTYPE=LINE1;SVLEN=1156;MEINFO=L1Ambig,4863,6019,+;DIFF=0.06:n1-4861,n5157-6019;LP=11;RP=4;RA=1.459;ISTP=0;PRIOR=false;SR=7;AF=0.000150105;AC=1	.	.	.	0.000150105	.	.	.
1	13838169	ALU	TSD=CAATTTATGCTTTT;ASSESS=5;INTERNAL=null,null;SVTYPE=ALU;SVLEN=279;MEINFO=AluYb8,2,281,-;DIFF=1:c57t,c64t,c98a,t144c,g211a,c236t,c248g,i252gcagtcc,g253a,a252g;LP=20;RP=21;RA=-0.07;PRIOR=false;SR=9;AF=0.000200321;AC=1	0.000200321	.	.	.	.	.	.
1	13846024	ALU	TSD=TTTTTTTTTTT;ASSESS=5;INTERNAL=PRDM2,TERMINATOR;SVTYPE=ALU;SVLEN=279;MEINFO=AluY,1,280,-;DIFF=1:g5a,c53t,c174t,g196c,g199t,c206t,g214a,c218g,c229a,c230t,c238t,c246t;LP=7;RP=12;RA=-0.778;PRIOR=false;SR=5;AF=0.0022482;AC=5	.	.	0.0022482	.	.	.	.
1	13927649	SVA	TSD=TGAGCCAGGCATGTTTTT;ASSESS=5;INTERNAL=null,null;SVTYPE=SVA;SVLEN=847;MEINFO=SVA,469,1316,-;DIFF=0.38:n1-407,g422t,a487t,i494c,a513g,a561c,t564c,a578g,t580c,t582c,g603t,a668g,t729c,g764c,a773g,i800c,t810c,n820-881,g938a,c945a,t970c,t985c,g989c,c990t,g1009t,a1053g,g1064a,g1067a,a1079g,n1085,n1088-1316;LP=64;RP=89;RA=-0.476;PRIOR=false;SR=92;AF=0.00358166;AC=5;GENE=KAZN	0.00439297	0.00358166	.	0.00990693	.	0.00173611	.
1	14018055	ALU	TSD=AAATTATTATCCCC;ASSESS=5;INTERNAL=PRDM2,TERMINATOR;SVTYPE=ALU;SVLEN=281;MEINFO=AluYc1,0,281,+;DIFF=1:c87t,g148a;LP=14;RP=16;RA=-0.193;PRIOR=false;SR=23;AF=0.000150105;AC=1	.	.	.	0.000150105	.	.	.
1	14030986	ALU	TSD=TTCTTTATGTCTTT;ASSESS=5;INTERNAL=null,null;SVTYPE=ALU;SVLEN=280;MEINFO=AluYb9,1,281,-;DIFF=1:c57t,c64t,c98a,t144c,c174g,g211a,c236t,i252gcagtcc,c248g,a252g;LP=24;RP=22;RA=0.126;PRIOR=false;SR=35;AF=0.00143266;AC=2;GENE=KAZN	0.000399361	0.00143266	.	0.00210147	.	.	.
1	14078462	ALU	TSD=AAGAGAGGGACCA;ASSESS=5;INTERNAL=null,null;SVTYPE=ALU;SVLEN=280;MEINFO=AluYb3a1,1,281,+;DIFF=1:c53t,c57t,a76t,t86g,t93c,c98t,c174g,g211a,c236t,i252gcagtcc,c248g,a252g;LP=36;RP=48;RA=-0.415;PRIOR=false;SR=13;AF=0.000399361;AC=2	0.000399361	.	.	.	.	.	.
1	14109813	ALU	TSD=null;ASSESS=4;INTERNAL=null,null;SVTYPE=ALU;SVLEN=273;MEINFO=AluY,7,280,+;DIFF=0.57:c10t,g75a,a76t,g90a,c98t,c117t,g143a,g149a,c150t,g155a,g175a,g196c,g199t,g207a,g211a,g214c,c218g,g231a,g237a,c238t,g277a;LP=442;RP=286;RA=0.628;PRIOR=false;SR=1670;AF=0.25788;AC=360;GENE=KAZN	0.273163	0.25788	0.185701	.	0.150794	.	.
1	14278949	ALU	TSD=TTTTTTTTTTTTTTTTTTTTTTT;ASSESS=5;INTERNAL=null,null;SVTYPE=ALU;SVLEN=279;MEINFO=AluY,1,280,+;DIFF=0.96:g5t,g11c,c20t,i65gt,g68t,g75a,a76t,c78t,t86g,g91a,c92t,c96t,c98a,g99a,t101c,g102a,c107t,g110a,c112t,t118a,g139a,g143a,c206t,c236t,g261a,c268t,c276t;LP=17;RP=75;RA=-2.141;PRIOR=false;SR=35;AF=0.00520833;AC=6	.	.	.	.	.	0.00520833	.
1	14319022	ALU	TSD=null;ASSESS=3;INTERNAL=KAZN,PROMOTER;SVTYPE=ALU;SVLEN=279;MEINFO=AluY,1,280,+;DIFF=0.95:g9a,g21a,g58a,g65a,c87a,c98t,c109t,c138t,g143a,g155a,t163c,g186a,g231a,g233a,c236a,c238t,c243t,t274c;LP=4;RP=4;RA=0;PRIOR=false;SR=1;AF=0.00135095;AC=9	.	.	.	0.00135095	.	.	.
1	14328771	ALU	TSD=AAAAAAAAAAAAAAAAAAAAAAA;ASSESS=5;INTERNAL=null,null;SVTYPE=ALU;SVLEN=279;MEINFO=AluY,1,280,+;DIFF=0.92:g5a,g9a,g58a,t86g,t93c,c98t,g143a,c166t,c198t,g211a,g231a,c236t,g237a,c238t;LP=53;RP=62;RA=-0.226;PRIOR=false;SR=83;AF=0.0277778;AC=32	.	.	.	.	.	0.0277778	.
1	14349680	ALU	TSD=GAAAGAAACAGCCC;ASSESS=5;INTERNAL=KAZN,PROMOTER;SVTYPE=ALU;SVLEN=281;MEINFO=AluYa4_5,0,281,+;DIFF=0.96:c20t,g67a,g72a,c78t,t89c,c96a,g110a,c112t,g145a,c174t,g261a,g269a,g277a,i133a;LP=22;RP=25;RA=-0.184;PRIOR=false;SR=9;AF=0.000150105;AC=1	.	.	.	0.000150105	.	.	.
1	14394646	ALU	TSD=GCTCCTTTACAATCTT;ASSESS=5;INTERNAL=null,null;SVTYPE=ALU;SVLEN=281;MEINFO=AluYa4_5,0,281,-;DIFF=1:t89c,c96a,g145a,c174t,c236t;LP=13;RP=16;RA=-0.3;PRIOR=false;SR=12;AF=0.000199681;AC=1	0.000199681	.	.	.	.	.	.
1	14466675	ALU	TSD=AAAAAAAAAAAAAAA;ASSESS=5;INTERNAL=null,null;SVTYPE=ALU;SVLEN=268;MEINFO=AluY,12,280,-;DIFF=0.9:g21a,g49a,c98t,c138t,c174t,g199t,g207a,c218g,g231a,c236t,c238t,g261a,c275t,c276t;LP=43;RP=83;RA=-0.949;PRIOR=false;SR=16;AF=0.0121528;AC=14	0.000599042	.	.	.	.	0.0121528	.
1	14469094	SVA	TSD=GAAAATGCTTCTCTC;ASSESS=5;INTERNAL=null,null;SVTYPE=SVA;SVLEN=1312;MEINFO=SVA,4,1316,+;DIFF=0.27:n1-949,g1005c,g1009t,a1053g,g1067a,a1079g,g1268a,c1289g,t1292c;LP=2;RP=13;RA=-2.7;PRIOR=false;SR=6;AF=0.000716332;AC=1;GENE=KAZN	0.000199681	0.000716332	.	.	.	.	.
1	14497714	ALU	TSD=AAGAATCTGG;ASSESS=5;INTERNAL=KAZN,PROMOTER;SVTYPE=ALU;SVLEN=176;MEINFO=AluYa3_4,105,281,+;DIFF=0.96:c10t,c20t,c48t,g49a,c53t,g54a,g55a,g58a,g59a,a76t,t86g,t93c,c98t,t101a,g145a,c174t,g237c;LP=6;RP=6;RA=0;PRIOR=false;SR=8;AF=0.000150105;AC=1	.	.	.	0.000150105	.	.	.
1	14514501	ALU	TSD=null;ASSESS=3;INTERNAL=null,null;SVTYPE=ALU;SVLEN=279;MEINFO=AluY,1,280,-;DIFF=0.55:g5a,g9a,g11a,g34a,c48t,c53t,g58a,g110a,c126a,c138t,g143a,c150t,g151a,g155a,g162a,c198t,g207a,g226a,c260t,g269a,c276t;LP=147;RP=53;RA=1.472;PRIOR=false;SR=151;AF=0.000599042;AC=3	0.000599042	.	0.00495049	0.00257264	.	.	.
1	14522567	LINE1	TSD=TCTGGGTGTTGTTTT;ASSESS=5;INTERNAL=null,null;SVTYPE=LINE1;SVLEN=114;MEINFO=L1Ta,5905,6019,-;DIFF=0.02:n1-5904,a6006g,t6011g;LP=2;RP=4;RA=-1;ISTP=0;PRIOR=false;SR=14;GENE=KAZN;AF=0.000199681;AC=1	0.000199681	.	.	.	.	.	.
1	14528490	LINE1	TSD=TCATATTTTTA;ASSESS=5;INTERNAL=null,null;SVTYPE=LINE1;SVLEN=112;MEINFO=L1Ta,5907,6019,-;DIFF=0.02:n1-5904,c5913t,g5939c,c5945t;LP=11;RP=4;RA=1.459;ISTP=0;PRIOR=false;SR=9;GENE=KAZN;AF=0.000199681;AC=1	0.000199681	.	.	.	.	.	.
1	14660565	ALU	TSD=null;ASSESS=4;INTERNAL=KAZN,INTRONIC;SVTYPE=ALU;SVLEN=279;MEINFO=AluYf,1,280,-;DIFF=0.18:g5a,c8a,c10t,g49a,g58a,c64t,g65a,g72t,g99a;LP=1;RP=2;RA=-1;PRIOR=false;SR=1;AF=0.0030021;AC=20	.	.	.	0.0030021	.	.	.
1	14662630	ALU	TSD=null;ASSESS=4;INTERNAL=NM_201628,INTRONIC;SVTYPE=ALU;SVLEN=279;MEINFO=AluY,1,280,+;DIFF=0.98:c98t,g162a,g196t,g199t,g207a,g214a,c218g,c268t,g269a,g277a;LP=12;RP=21;RA=-0.807;PRIOR=false;SR=4;AF=0.000199681;AC=1	0.000199681	.	.	.	.	.	.
1	14681624	ALU	TSD=TATATGTGTATATATATAT;ASSESS=5;INTERNAL=NM_201628,INTRONIC;SVTYPE=ALU;SVLEN=268;MEINFO=AluSg,12,280,-;DIFF=0.82:c20t,c48t,g49a,g54a,g55a,c57a,d65-66,c80t,c86t,c89t,g102a,c108t,c111t,i129a,c139t,g144a,c151t,c153g,c197g,g208a,g219c;LP=17;RP=19;RA=-0.16;PRIOR=false;SR=9;GENE=KAZN;AF=0.0819672;AC=10	.	.	.	.	0.0819672	.	.
1	14681634	ALU	TSD=TATATATATATATATATATAT;ASSESS=5;INTERNAL=NM_201628,INTRONIC;SVTYPE=ALU;SVLEN=215;MEINFO=AluY,65,280,-;DIFF=0.59:c98t,c107t,c109t,g143a,g155a,g196c,g199t,c204a,c206t,g214a,g231a,c236t;LP=237;RP=98;RA=1.274;PRIOR=false;SR=363;AF=0.0308023;AC=43;GENE=KAZN	0.0441294	0.0308023	0.121403	.	.	.	.
1	14745253	ALU	TSD=null;ASSESS=3;INTERNAL=KAZN,INTRONIC;SVTYPE=ALU;SVLEN=272;MEINFO=AluYg,8,280,+;DIFF=0.6:g52a,g58a,g79t,g102a,g139a,c142t,g143a,g151a,c154t,c165a,g192a,a193g,g196c,g199t,a203g,g207a,g212a,c213a,c218t,c236t,g237a,c238t,g271a;LP=4;RP=7;RA=-0.807;PRIOR=false;SR=1;AF=0.00390273;AC=26	.	.	.	0.00390273	.	.	.
1	14749447	SVA	TSD=AAAAAGCATTCTT;ASSESS=5;INTERNAL=NM_201628,INTRONIC;SVTYPE=SVA;SVLEN=770;MEINFO=SVA,546,1316,-;DIFF=0.48:n1-668,a692c,t729c,g730a,c733t,c750t,c757g,g764c,a773g,c801g,a825g,a827g,a836g,a838g,g840t,a873g,g880c,a886g,g898a,t922g,a931g,a934t,g938a,c945a,g1009t,a1018g,c1019t,a1053g,g1067a,a1069g,a1079g,a1090g,c1129g,a1132g,a1133g,c1157t,a1175g,a1176g,a1238g,t1292c;LP=15;RP=30;RA=-1;PRIOR=false;SR=1…	0.000199681	.	.	.	.	.	.
1	14778340	ALU	TSD=AAAACCGCAAAAGG;ASSESS=5;INTERNAL=KAZN,INTRONIC;SVTYPE=ALU;SVLEN=281;MEINFO=AluYe,0,281,+;DIFF=0.99:t144a,g207c,a210g,t219c,c236t,d264;LP=14;RP=35;RA=-1.322;PRIOR=false;SR=23;AF=0.00030021;AC=2	.	.	.	0.00030021	.	.	.
1	14782266	SVA	TSD=GAAATGCACCTCCCGG;ASSESS=5;INTERNAL=NM_201628,INTRONIC;SVTYPE=SVA;SVLEN=690;MEINFO=SVA,626,1316,+;DIFF=0.44:n1-737,g748a,c750t,c757g,g764c,a773g,c801g,a825g,a827g,a836g,a838g,g840t,g880c,a886g,g898a,a899c,t922g,a931g,a934t,g938a,c945a,g1009t,c1019t,a1053g,g1067a,a1079g,c1129g,c1157t,g1268a,t1292c;LP=28;RP=9;RA=1.637;PRIOR=false;SR=13;GENE=KAZN;AF=0.000199681;AC=1	0.000199681	.	.	.	.	.	.
1	14856374	ALU	TSD=null;ASSESS=4;INTERNAL=NM_201628,INTRONIC;SVTYPE=ALU;SVLEN=281;MEINFO=AluYc1,0,281,+;DIFF=1:g148a,a191g,c276t;LP=36;RP=30;RA=0.263;PRIOR=false;SR=26;AF=0.00143266;AC=2;GENE=KAZN	0.000399361	0.00143266	.	.	.	.	.
1	14883426	ALU	TSD=null;ASSESS=4;INTERNAL=NM_201628,INTRONIC;SVTYPE=ALU;SVLEN=279;MEINFO=AluY,1,280,+;DIFF=0.96:g9a,g11a,c20t,c57t,c98t,c117t,g153a,g196c,g197a,g199t,c206t,c213t,c218g,g231a,c238t,g269a,c273g,g277a;LP=80;RP=27;RA=1.567;PRIOR=false;SR=12;AF=0.000399361;AC=2	0.000399361	.	.	0.0058541	.	.	.
1	14904235	SVA	TSD=AAGAATTGCCTCACTTGGGAGG;ASSESS=5;INTERNAL=NM_201628,INTRONIC;SVTYPE=SVA;SVLEN=1167;MEINFO=SVA,149,1316,+;DIFF=0.41:n1-960,t970c,a978g,t985c,g1009t,a1053g,g1067a,a1079g,c1129g,c1146a,c1163a,c1164t,t1267c,g1268a,g1310t;LP=27;RP=32;RA=-0.245;PRIOR=false;SR=31;GENE=KAZN;AF=0.000399361;AC=2	0.000399361	.	.	.	.	.	.
1	14920296	ALU	TSD=TTTTTTTTTTTTTTTTTTTT;ASSESS=5;INTERNAL=KAZN,INTRONIC;SVTYPE=ALU;SVLEN=279;MEINFO=AluY,1,280,+;DIFF=0.57:g5a,c8t,c57t,t93a,c98t,c109t,g110a,g151a,g152c,c154t,g155a,a171c,g175c,g176a,g196t,g199t,c213t,c218g,g237a,c260t;LP=4;RP=3;RA=0.415;PRIOR=false;SR=7;AF=0.00690483;AC=46	.	.	.	0.00690483	.	.	.
1	14933582	ALU	TSD=TCCAGGTATCTTTTT;ASSESS=5;INTERNAL=NM_001018001,INTRONIC;SVTYPE=ALU;SVLEN=250;MEINFO=AluYa,31,281,-;DIFF=0.93:t26g,t89c,c96a,g145a,c174t,c236t;LP=343;RP=252;RA=0.445;PRIOR=false;SR=345;AF=0.02149;AC=30;GENE=KAZN	0.0189696	0.02149	.	0.0636446	.	0.00347222	.
1	14944245	ALU	TSD=null;ASSESS=4;INTERNAL=NM_001018001,INTRONIC;SVTYPE=ALU;SVLEN=279;MEINFO=AluSz,1,280,+;DIFF=0.98:c57t,t65g,t78a,c95t,i129a,g154a,c155t,c175t,c214t,g219c,c231t;LP=27;RP=40;RA=-0.567;PRIOR=false;SR=8;AF=0.00347222;AC=4	.	.	.	.	.	0.00347222	.
1	14956317	ALU	TSD=AAAAAAAAAAAAAAAAAA;ASSESS=5;INTERNAL=KAZN,INTRONIC;SVTYPE=ALU;SVLEN=279;MEINFO=AluSg,1,280,+;DIFF=0.18:g5a,g9a,c10t,g45a,g54t,g58a,c62t,d65-66,g92a,a125c,i129n,c139t,c143t,t164a,d194-282;LP=1;RP=4;RA=-2;PRIOR=false;SR=8;AF=0.158211;AC=1054	.	.	.	0.158211	.	.	.
1	14966850	SVA	TSD=CTAATTTTGTATTTTT;ASSESS=5;INTERNAL=KAZN,INTRONIC;SVTYPE=SVA;SVLEN=1202;MEINFO=SVA,114,1316,-;DIFF=0.39:n1-114,c126t,c158t,a167g,g192c,t193c,c201t,t202g,c205t,d212,a218g,g219a,t221a,g225a,a231g,c232t,t236c,i246cat,g250a,c253t,g254a,t258a,g271t,g274t,g278a,g322a,t324c,a327g,g331c,c361t,t366c,n385-591,a594g,t597g,n599-600,n605-606,a607c,n608-609,n612,n614-615,n620,n622-623,g632a,n635,n645,n647,n…	.	.	0.117356	.	.	.	.
1	14974433	ALU	TSD=AAATGAAGATTTT;ASSESS=5;INTERNAL=KAZN,INTRONIC;SVTYPE=ALU;SVLEN=266;MEINFO=AluYa4_5,15,281,-;DIFF=0.95:g7a,t89c,c96a,g145a,c174t,c236t;LP=7;RP=9;RA=-0.363;PRIOR=false;SR=9;AF=0.000150105;AC=1	.	.	.	0.000150105	.	.	.
1	15066667	ALU	TSD=null;ASSESS=3;INTERNAL=KAZN,INTRONIC;SVTYPE=ALU;SVLEN=279;MEINFO=AluSz,1,280,+;DIFF=1:c57t,t65g,t78a,i129a,c139t,g152a,c153g,a163g,g208a,g238a,c239t,c269t,g278a;LP=22;RP=27;RA=-0.295;PRIOR=false;SR=4;AF=0.000312317;AC=31	.	.	.	.	.	.	0.000312317
1	15139654	ALU	TSD=AAAA;ASSESS=5;INTERNAL=NR_027136,INTRONIC;SVTYPE=ALU;SVLEN=279;MEINFO=AluY,1,280,-;DIFF=0.95:g11a,c48t,g54a,c98t,c138t,g196t,g199t,c206t,g214a,c218g,c255t,g261a,t274a,c276t;LP=34;RP=22;RA=0.628;PRIOR=false;SR=5;AF=0.002149;AC=3;GENE=TMEM51-AS1	.	0.002149	0.00179856	.	.	.	.
1	15163638	ALU	TSD=AGACTGTTATTTTTT;ASSESS=5;INTERNAL=NM_001136218,INTRONIC;SVTYPE=ALU;SVLEN=112;MEINFO=AluY,169,281,-;DIFF=0.4:g58a,c64t,c78g,c98t,a122g,g139a,g155a,a167g,a188g,g237c,c276t;LP=494;RP=405;RA=0.287;PRIOR=false;SR=993;AF=0.0465616;AC=65;GENE=TMEM51	0.0627247	0.0465616	0.205486	0.0231301	.	0.0755208	.
1	15170160	ALU	TSD=TGTCATAATTATTTTT;ASSESS=5;INTERNAL=NM_001278501,INTRONIC;SVTYPE=ALU;SVLEN=242;MEINFO=AluYb8,39,281,-;DIFF=0.86:c30t,c57t,c64t,c98a,i127aaaa,t144c,g211a,c236t,c248g,i252gcagtcc,g253a,a252g;LP=170;RP=140;RA=0.28;PRIOR=false;SR=174;AF=0.0100287;AC=14;GENE=TMEM51	0.00998403	0.0100287	.	0.022816	.	0.00434028	.
1	15173689	ALU	TSD=AAAAAAAAAAAAA;ASSESS=5;INTERNAL=NM_001136218,INTRONIC;SVTYPE=ALU;SVLEN=279;MEINFO=AluY,1,280,+;DIFF=0.98:g11a,c48t,c53t,c57a,i65gt,c98t;LP=20;RP=56;RA=-1.485;PRIOR=false;SR=8;AF=0.00173611;AC=2	.	.	.	.	.	0.00173611	.
1	15180236	ALU	TSD=CCATTAGTCTGTTTTT;ASSESS=5;INTERNAL=NM_001136218,INTRONIC;SVTYPE=ALU;SVLEN=278;MEINFO=AluYb7_3,3,281,-;DIFF=1:c57t,c98a,t144c,g207a,g211a,c236t,c243t,i252gcagtcc,g261a,c248g,a252g;LP=261;RP=286;RA=-0.132;PRIOR=false;SR=276;AF=0.0121777;AC=17;GENE=TMEM51	0.00938498	0.0121777	.	0.0409787	0.015873	0.00434028	.
1	15197954	ALU	TSD=null;ASSESS=3;INTERNAL=NM_001136218,INTRONIC;SVTYPE=ALU;SVLEN=209;MEINFO=AluSz,72,281,+;DIFF=1:t65g,c80t,t100c,i129a,c139t,c153g,c155t,a163g,g215a,c231t,c237t,g262a,g270a,c277t;LP=107;RP=104;RA=0.041;PRIOR=false;SR=6;AF=0.00347222;AC=4	.	.	.	.	.	0.00347222	.
1	15263535	ALU	TSD=TTTTTTTTTTTTTTTTTTTTTTTTT;ASSESS=5;INTERNAL=NM_052929,INTRONIC;SVTYPE=ALU;SVLEN=279;MEINFO=AluY,1,280,-;DIFF=1:c4t,c57t,t93c,c98t,c138t,g151a,c154t,g199t,g269a,c276t;LP=14;RP=30;RA=-1.1;PRIOR=false;SR=26;AF=0.012894;AC=18;GENE=FHAD1	.	0.012894	.	.	.	.	.
1	15296915	LINE1	TSD=AAGAAACCACCTCTT;ASSESS=5;INTERNAL=NM_052929,INTRONIC;SVTYPE=LINE1;SVLEN=408;MEINFO=L1Ta,5611,6019,+;DIFF=0.09:n1-5608;LP=11;RP=13;RA=-0.241;ISTP=0;PRIOR=false;SR=11;GENE=FHAD1;AF=0.000199681;AC=1	0.000199681	.	.	.	.	.	.
1	15318881	ALU	TSD=AATTTTTTT;ASSESS=5;INTERNAL=NM_052929,INTRONIC;SVTYPE=ALU;SVLEN=277;MEINFO=AluY,4,281,-;DIFF=1:g148a,g162a,c174t,g199t,c206t,g214a,c218g,g231a,c236t,c238t;LP=106;RP=114;RA=-0.105;PRIOR=false;SR=22;AF=0.000399361;AC=2	0.000399361	.	.	.	.	.	.
1	15376096	ALU	TSD=TTTTTTTATTTATTTTTTT;ASSESS=5;INTERNAL=FHAD1,INTRONIC;SVTYPE=ALU;SVLEN=279;MEINFO=AluY,1,280,+;DIFF=1:c98t,g207a,g231a,g237a,c276t,g277a;LP=24;RP=19;RA=0.337;PRIOR=false;SR=4;AF=0.00090063;AC=6	.	.	.	0.00090063	.	.	.
1	15379099	HERVK	TSD=null;ASSESS=3;INTERNAL=FHAD1,INTRONIC;SVTYPE=HERVK;SVLEN=8417;MEINFO=HERVK,342,8759,+;DIFF=0.05:n1-8119,t8149a,c8184t,a8239t,a8250c,n8259-8516,t8520c,t8522c,a8527c,t8561c,t8562g,a8576g,g8577a,t8649c,a8700g,c8709t,t8739g,a8740g,n8745-8759;LP=63;RP=36;RA=0.807;PRIOR=false;SR=3;AF=0.00060042;AC=4	.	.	.	0.00060042	.	.	.
1	15379168	HERVK	TSD=null;ASSESS=3;INTERNAL=FHAD1,INTRONIC;SVTYPE=HERVK;SVLEN=8417;MEINFO=HERVK,342,8759,+;DIFF=0.04:n1-8119,t8149a,n8274-8354,t8503c,t8562c,g8577a,n8660-8759;LP=51;RP=74;RA=-0.537;PRIOR=false;SR=2;AF=0.00060042;AC=4	.	.	.	0.00060042	.	.	.
1	15392992	ALU	TSD=AAGAGTCAGCAACGTGGC;ASSESS=5;INTERNAL=FHAD1,INTRONIC;SVTYPE=ALU;SVLEN=278;MEINFO=AluYb6_2,3,281,+;DIFF=0.96:c57t,c64t,c98a,i119aaa,t144c,g211a,c236t,g265c,d281;LP=33;RP=51;RA=-0.628;PRIOR=false;SR=11;AF=0.000150105;AC=1	.	.	.	0.000150105	.	.	.
1	15475812	ALU	TSD=AAAAAAAAAAAAAAAAAAA;ASSESS=5;INTERNAL=NM_015849,PROMOTER;SVTYPE=ALU;SVLEN=279;MEINFO=AluY,1,280,+;DIFF=0.95:g7a,c10t,g14a,g25a,c35a,c48t,g58a,a76t,g79a,t86g,t93c,c98t,c138t,c142t,c150t,g199t,g207a,g214a,g261a,g269a,g277a,d281;LP=86;RP=72;RA=0.256;PRIOR=false;SR=11;AF=0.0078125;AC=9	.	.	.	.	.	0.0078125	.
1	15487707	ALU	TSD=AAGAGTGAGTTCC;ASSESS=5;INTERNAL=NM_015849,INTRONIC;SVTYPE=ALU;SVLEN=281;MEINFO=AluYe,0,281,+;DIFF=0.99:t144a,i207ga,a210g,t219c,c236t,d264;LP=44;RP=56;RA=-0.348;PRIOR=false;SR=64;AF=0.000599042;AC=3	0.000599042	.	.	0.000150105	.	.	.
1	15546934	ALU	TSD=TTTTTTTTTTTTTTTTTTT;ASSESS=5;INTERNAL=DNAJC16,INTRONIC;SVTYPE=ALU;SVLEN=278;MEINFO=AluY,2,280,+;DIFF=1:c8t,g9a,g11a,c98t,c109t,g151a,g162a,g261a,c276t;LP=26;RP=7;RA=1.893;PRIOR=false;SR=4;AF=0.00210732;AC=209	.	.	.	.	.	.	0.00210732
1	15659368	ALU	TSD=AAGAATCACCC;ASSESS=5;INTERNAL=DDI2,INTRONIC;SVTYPE=ALU;SVLEN=281;MEINFO=AluYe4,0,281,+;DIFF=0.99:c109t,t144a,g175c,i204c,g207a,a210g,t219c,c236t,d265;LP=33;RP=31;RA=0.09;PRIOR=false;SR=43;AF=0.000450315;AC=3	.	.	.	0.000450315	.	.	.
1	15666351	SVA	TSD=GAAAATAGCTCTCCTG;ASSESS=5;INTERNAL=NM_006511,TERMINATOR;SVTYPE=SVA;SVLEN=274;MEINFO=SVA,1042,1316,+;DIFF=0.21:n1-1042,a1053g,g1067a,a1068g,a1079g,a1102g,a1116g,c1129g,a1132g,c1157t,c1163t,a1178g,g1268a,t1292c;LP=2;RP=12;RA=-2.585;PRIOR=false;SR=14;AF=0.000199681;AC=1	0.000199681	.	.	.	.	.	.
1	15738819	LINE1	TSD=null;ASSESS=4;INTERNAL=SLC25A34,INTRONIC;SVTYPE=LINE1;SVLEN=3211;MEINFO=L1Ambig,2807,6018,+;DIFF=0.05:n1-4276,n4302-4327,a4367c,c4374t,g4408a,t4418a,a4421c,n4437-4529,c4552t,c4575g,n4596-6019;LP=6;RP=10;RA=-0.737;ISTP=-1;PRIOR=false;SR=5;AF=1.00737e-05;AC=1	.	.	.	.	.	.	1.00737e-05
1	15832315	SVA	TSD=null;ASSESS=3;INTERNAL=NR_024279,TERMINATOR;SVTYPE=SVA;SVLEN=1240;MEINFO=SVA,75,1315,-;DIFF=0.29:n1-871,g880c,g938a,c945a,t970c,t985c,g1009t,a1053g,g1067a,a1079g,c1129g,c1146a,c1163a,c1164t,t1267c,g1268a,g1310t;LP=1;RP=48;RA=-5.585;PRIOR=false;SR=14;AF=0.000599042;AC=3	0.000599042	.	.	.	.	.	.
1	15832327	SVA	TSD=AAGAAATTCTCC;ASSESS=5;INTERNAL=NR_024279,TERMINATOR;SVTYPE=SVA;SVLEN=1240;MEINFO=SVA,75,1315,+;DIFF=0.25:n1-933,g938a,c945a,t970c,t985c,g1009t,a1053g,g1067a,a1079g,c1129g,c1146a,c1163a,c1164t,t1267c,g1268a,g1310t;LP=1;RP=13;RA=-3.7;PRIOR=false;SR=7;AF=0.000716332;AC=1	.	0.000716332	.	0.0030021	.	.	.
1	15835737	SVA	TSD=null;ASSESS=4;INTERNAL=NR_024279,3_UTR;SVTYPE=SVA;SVLEN=434;MEINFO=SVA,881,1315,-;DIFF=0.25:n1-880,a886g,g898a,n902,t922g,a931g,a934t,n935,g938a,c945a,g1009t,c1019t,a1053g,g1067a,a1079g,c1129g,c1157t,t1292c;LP=9;RP=1;RA=3.17;PRIOR=false;SR=3;GENE=FLJ37453;AF=0.000199681;AC=1	0.000199681	.	.	.	.	.	.
1	15859156	ALU	TSD=TTTTTTTTTTTTTTTT;ASSESS=5;INTERNAL=SPEN,INTRONIC;SVTYPE=ALU;SVLEN=102;MEINFO=AluYa,178,280,-;DIFF=0.36:t182a,g186a,c198t,g207a,g237c,g269a,g277c;LP=687;RP=114;RA=2.591;PRIOR=false;SR=674;AF=0.0180126;AC=120	.	.	0.00044964	0.0180126	.	.	.
1	15938584	ALU	TSD=TTTTTTTTTTTTTTTTTTT;ASSESS=5;INTERNAL=NM_015001,INTRONIC;SVTYPE=ALU;SVLEN=279;MEINFO=AluY,1,280,+;DIFF=0.95:g5a,g9a,g11a,c20g,g51a,g54a,g58a,c70t,c98t,g199t,c218g;LP=22;RP=54;RA=-1.295;PRIOR=false;SR=10;AF=0.00347222;AC=4	.	.	.	.	.	0.00347222	0.0308636
1	16002856	SVA	TSD=ATAAAATAAAATAGG;ASSESS=5;INTERNAL=NM_178840,PROMOTER;SVTYPE=SVA;SVLEN=1240;MEINFO=SVA,75,1315,-;DIFF=0.33:n1-764,a773g,n775,n799,a802g,a825g,c826t,g840c,t847g,t862c,n865,g880c,n895,a906g,n914-918,a931g,a935g,g938a,c945a,t970c,t985c,g1009t,a1053g,g1067a,a1079g,c1129g,t1197a,g1268a,a1279t,t1292c,t1312a;LP=197;RP=774;RA=-1.974;PRIOR=false;SR=669;AF=0.0422636;AC=59	.	0.0422636	.	.	.	.	.
1	16130170	SVA	TSD=null;ASSESS=3;INTERNAL=EPHA2,INTRONIC;SVTYPE=SVA;SVLEN=389;MEINFO=SVA,926,1315,+;DIFF=0.17:n1-925,c945g,t965c,t973c,n1002-1152,n1158,c1163a,c1164t,t1267c,g1268a,g1310t;LP=1;RP=16;RA=-4;PRIOR=false;SR=7;AF=5.03687e-05;AC=5	.	.	.	.	.	.	5.03687e-05
1	16215446	ALU	TSD=TATTTATTTAT;ASSESS=5;INTERNAL=NM_153213,PROMOTER;SVTYPE=ALU;SVLEN=279;MEINFO=AluSz,1,280,+;DIFF=0.95:g11a,g45a,g49a,c53a,t65g,c111t,c155t,g219c,c239t,d271-282;LP=28;RP=73;RA=-1.382;PRIOR=false;SR=16;AF=0.000868056;AC=1	.	.	.	.	.	0.000868056	.
1	16241079	ALU	TSD=TTTTTTTTTTTTTTTTTTTTT;ASSESS=5;INTERNAL=NM_030907,PROMOTER;SVTYPE=ALU;SVLEN=279;MEINFO=AluSz,1,280,+;DIFF=0.99:c4t,g9a,g11a,g54a,t65g,i108c,g112a,i129a,g140a,g144a,c153g,g156a,g176a,g219c,c237t,g240a,g270a;LP=29;RP=55;RA=-0.923;PRIOR=false;SR=25;AF=0.0138889;AC=16	.	.	.	.	.	0.0138889	.
1	16267805	ALU	TSD=TAAAAACATCATTCT;ASSESS=5;INTERNAL=NM_018994,INTRONIC;SVTYPE=ALU;SVLEN=280;MEINFO=AluYa1_1,1,281,-;DIFF=1:c57t,c64t,c98a,g145a,g211a,c236t,a252g;LP=21;RP=10;RA=1.07;PRIOR=false;SR=16;AF=0.000199681;AC=1	0.000199681	.	.	.	.	.	.
1	16270674	ALU	TSD=null;ASSESS=3;INTERNAL=FBXO42,INTRONIC;SVTYPE=ALU;SVLEN=279;MEINFO=AluY,1,280,-;DIFF=1:c4t,g9a,c10a,g11a,g14a,c57t,c64t,g79a,g110a,g199t,c206t;LP=17;RP=16;RA=0.087;PRIOR=false;SR=24;AF=0.0516361;AC=344	.	.	.	0.0516361	.	.	.
1	16270696	ALU	TSD=AAAAAAAAAAAAAAAAAAAAAA;ASSESS=5;INTERNAL=NM_018994,INTRONIC;SVTYPE=ALU;SVLEN=279;MEINFO=AluSz,1,280,-;DIFF=1:c10t,g54a,c57t,t65g,c95t,g112a,i129a,g140a,c155t,a163g,c197g,c207t,g219c,c237t;LP=71;RP=52;RA=0.449;PRIOR=false;SR=38;AF=0.0616319;AC=71	.	.	0.0121403	.	.	0.0616319	.
1	16313332	ALU	TSD=null;ASSESS=3;INTERNAL=FBXO42,INTRONIC;SVTYPE=ALU;SVLEN=279;MEINFO=AluYb,1,280,-;DIFF=0.96:c53t,c57t,i65gt,a76t,t86g,t93c,c98t,g110a,c174t,g180a,c198t,c206t,g231a,c236a,g237a,c238t,c246a,c248t,t249a,c263a,c276t,i127a;LP=27;RP=21;RA=0.363;PRIOR=false;SR=11;GENE=FBXO42;AF=0.00044964;AC=1	.	.	0.00044964	.	.	.	.
1	16313336	ALU	TSD=null;ASSESS=3;INTERNAL=NM_018994,INTRONIC;SVTYPE=ALU;SVLEN=279;MEINFO=AluSc,1,280,-;DIFF=0.75:c10t,t65g,g74a,t78a,g81a,g88t,c111t,i129a,c151t,g152a,c153t,c155t,g198a,g208a,g215a,c231t,d238-282;LP=50;RP=54;RA=-0.111;PRIOR=false;SR=13;AF=0.000868056;AC=1	.	.	.	.	.	0.000868056	.
1	16335063	ALU	TSD=null;ASSESS=3;INTERNAL=NM_018994,INTRONIC;SVTYPE=ALU;SVLEN=269;MEINFO=AluY,11,280,+;DIFF=0.96:c20t,g43a,c48t,g49a,g54a,g58a,g65a,c78t,g79a,c98t,g151a,c154t,g231a,g261a,c268t,c276t;LP=114;RP=97;RA=0.233;PRIOR=false;SR=74;AF=0.0494792;AC=57	.	.	.	.	.	0.0494792	.
1	16335091	ALU	TSD=AAAAAAAAAAAAAAAAAAAAAAAAAAAA;ASSESS=5;INTERNAL=NM_018994,INTRONIC;SVTYPE=ALU;SVLEN=278;MEINFO=AluSz,2,280,+;DIFF=0.98:g9t,c10t,c20t,g21c,c23a,g58a,t65g,c80t,g88t,i129a,c139t,c153g,a163g,c197g,c214t,c231t,g238a,c239t;LP=99;RP=113;RA=-0.191;PRIOR=false;SR=30;AF=0.128395;AC=643	0.128395	.	.	.	.	.	.
1	16384391	ALU	TSD=AAAAAAAAAAAAAAAA;ASSESS=5;INTERNAL=NM_001114600,INTRONIC;SVTYPE=ALU;SVLEN=279;MEINFO=AluY,1,280,+;DIFF=1:g5a,g42a,g49c,a76t,g79a,t86g,g110a,g139a,c154t,g207a,c238t;LP=34;RP=69;RA=-1.021;PRIOR=false;SR=7;AF=0.00173611;AC=2	.	.	.	.	.	0.00173611	.
1	16463507	ALU	TSD=TTTTTTTTTTTTTTTTTTTTTTTTTT;ASSESS=5;INTERNAL=CROCCP3,TERMINATOR;SVTYPE=ALU;SVLEN=76;MEINFO=AluY,205,281,-;DIFF=1:g5a,g11a,c57t,c98t,g110a,c138t,g152t,c154t,g196c,g199t,g207a,g214a,c218g,c230t,c268t,c276t;LP=9;RP=17;RA=-0.918;PRIOR=false;SR=3;AF=0.00179856;AC=4	.	.	0.00179856	.	.	.	.
1	16466849	ALU	TSD=TTTTTTTTTTTTTTTTTTTTTTT;ASSESS=5;INTERNAL=NR_023386,TERMINATOR;SVTYPE=ALU;SVLEN=279;MEINFO=AluSz,1,280,+;DIFF=0.95:c4t,g5a,t65g,g81a,i129a,g152a,c153g,c155t,a163g,c197t,c207t,c214t,g219c,c277t,d282;LP=32;RP=39;RA=-0.285;PRIOR=false;SR=6;AF=0.000868056;AC=1	.	.	.	.	.	0.000868056	.
1	16525856	ALU	TSD=null;ASSESS=4;INTERNAL=LINC01783,TERMINATOR;SVTYPE=ALU;SVLEN=275;MEINFO=AluY,5,280,+;DIFF=0:c10t,t26c,t29c,c35g,a76t,t86g,g91a,a94g,c96t,a97g,c98t,t101a,c106g,a128c,c174t,g214a;LP=4;RP=2;RA=1;PRIOR=false;SR=4;AF=0.00135095;AC=9	.	.	.	0.00135095	.	.	.
1	16537373	ALU	TSD=CCCCGAGGTCCCTTTTAT;ASSESS=5;INTERNAL=NM_001310155,PROMOTER;SVTYPE=ALU;SVLEN=278;MEINFO=AluYa4_5,3,281,-;DIFF=1:t89c,c96a,g143a,g145a,c174t,c236t;LP=419;RP=502;RA=-0.261;PRIOR=false;SR=133;AF=0.032235;AC=45;GENE=FAM231B	0.0231629	0.032235	.	0.0409787	.	0.00434783	.
1	16592151	ALU	TSD=CAGTAACTGAAATTCTT;ASSESS=5;INTERNAL=NM_017940,INTRONIC;SVTYPE=ALU;SVLEN=279;MEINFO=AluYa5b1,2,281,-;DIFF=1:c88t,t89c,c96a,g145a,a161g,c174t,g237c,c260t,i127a;LP=8;RP=8;RA=0;PRIOR=false;SR=5;AF=0.000199681;AC=1	0.000199681	.	.	.	.	.	.
1	16624937	LINE1	TSD=null;ASSESS=3;INTERNAL=CROCCP2,INTRONIC;SVTYPE=LINE1;SVLEN=5276;MEINFO=L1Ambig,742,6018,+;DIFF=0.02:n1-741,g772t,c833a,t847c,n893-6019;LP=1;RP=4;RA=-2;ISTP=0;PRIOR=false;SR=4;AF=0.0058541;AC=39	.	.	.	0.0058541	.	.	.
1	16629374	LINE1	TSD=TTTTTTTTTTTTTTTTT;ASSESS=5;INTERNAL=CROCCP2,INTRONIC;SVTYPE=LINE1;SVLEN=3124;MEINFO=L1Ambig,2894,6018,-;DIFF=0:n1-5367,c5391t,t5535g,g5536t,g5538t,a5563c,c5572t,t5582c,c5585t,n5616,n5619,n5650-5870,c5878g,a5884c,g5903a,t5911c,c5920t,g5923c,a5929g,c5930a,a5931g,g5935a,g5946a,g5952a,c5958t,a5988g,a5989t,n5991,n6004-6019;LP=2;RP=2;RA=0;ISTP=0;PRIOR=false;SR=45;GENE=CROCCP2;AF=0.37545;AC=835	.	.	0.37545	.	.	.	.
1	16640858	LINE1	TSD=null;ASSESS=3;INTERNAL=MST1P2,PROMOTER;SVTYPE=LINE1;SVLEN=411;MEINFO=L1Ambig,5607,6018,+;DIFF=0:n1-5606,a5712g,c5744t,n5758-6019;LP=1;RP=2;RA=-1;ISTP=0;PRIOR=false;SR=3;AF=0.0346743;AC=231	.	.	.	0.0346743	.	.	.
1	16640886	LINE1	TSD=AAAAAAAAAAAAAAAAAAAAAAAAAAAA;ASSESS=5;INTERNAL=MST1P2,PROMOTER;SVTYPE=LINE1;SVLEN=4520;MEINFO=L1Ambig,1498,6018,+;DIFF=0.04:n1-4658,n4668,n4696,g4716a,n4823,n4827-5093,c5109t,c5114t,c5118t,t5119c,g5144a,t5154g,n5161-5164,t5168g,c5183a,n5190,n5204,n5206,g5208a,n5211-5212,c5214t,n5216-5217,n5236-5327,a5334c,g5342a,c5352t,t5362a,g5375a,g5376a,c5391t,g5401c,n5479-6019;LP=5;RP=7;RA=-0.485;ISTP=0;P…	.	.	0.00180018	.	.	.	.
1	16646085	ALU	TSD=null;ASSESS=4;INTERNAL=NR_027504,INTRONIC;SVTYPE=ALU;SVLEN=281;MEINFO=AluYa4_5,0,281,+;DIFF=1:t89c,c96a,g145a,c174t,g199a,c236t;LP=18;RP=9;RA=1;PRIOR=false;SR=8;AF=0.000868056;AC=1	.	.	.	0.00225158	.	0.000868056	.
1	16722860	SVA	TSD=null;ASSESS=3;INTERNAL=NR_026567,PROMOTER;SVTYPE=SVA;SVLEN=1240;MEINFO=SVA,75,1315,+;DIFF=0.34:n1-875,g880c,a886g,g898a,t922g,g927c,a931g,a934t,g938a,c945a,g1009t,c1019t,n1028-1038,c1049t,a1053g,g1067a,a1079g,c1129g,c1157t,i1185aaggcc,g1268a,t1292c;LP=2;RP=20;RA=-3.322;PRIOR=false;SR=9;AF=0.000716332;AC=1	.	0.000716332	.	.	.	.	.
1	16722875	SVA	TSD=AAAAATAATGTCTAA;ASSESS=5;INTERNAL=NR_026567,PROMOTER;SVTYPE=SVA;SVLEN=1287;MEINFO=SVA,29,1316,+;DIFF=0.36:n1-875,g880c,a886g,g898a,t922g,g927c,a931g,a934t,g938a,c945a,g1009t,c1019t,n1028,n1030,n1044,n1046,n1049-1061,g1067a,a1079g,c1129g,c1157t,i1185aaggcc,g1268a,t1292c;LP=9;RP=102;RA=-3.503;PRIOR=false;SR=62;AF=0.00199681;AC=10	0.00199681	.	.	.	.	.	.
1	16730136	ALU	TSD=null;ASSESS=4;INTERNAL=NM_001310138,TERMINATOR;SVTYPE=ALU;SVLEN=279;MEINFO=AluY,1,280,-;DIFF=0.99:g5a,g11a,g58a,a76t,t93c,c98t,g211a,c260t,g267a,c268t,c276t;LP=27;RP=37;RA=-0.455;PRIOR=false;SR=20;AF=0.000868056;AC=1	.	.	.	0.05	.	0.000868056	.
1	16780262	SVA	TSD=null;ASSESS=4;INTERNAL=null,null;SVTYPE=SVA;SVLEN=1101;MEINFO=SVA,214,1315,-;DIFF=0.16:n1-213,a218g,g225a,a231g,i246cga,c253t,t258g,c267t,g271t,g322a,t324c,a327g,t366c,c386t,a395g,t405c,g406c,n429-430,c434t,c436t,g443a,n445,g451a,n478-1316;LP=1;RP=14;RA=-3.807;PRIOR=false;SR=1;AF=0.000868056;AC=1	.	.	.	.	.	0.000868056	.
1	16783213	ALU	TSD=null;ASSESS=3;INTERNAL=LOC102724562,PROMOTER;SVTYPE=ALU;SVLEN=271;MEINFO=AluY,9,280,+;DIFF=0.53:g49a,g55a,g56a,c57t,g67t,c84t,g91a,c98t,t101a,g110a,c138t,g145a,g162a,c172t,c174t,g185a,c198t,c236t,c238t,t244c;LP=1;RP=2;RA=-1;PRIOR=false;SR=1;AF=0.000150376;AC=1	.	.	.	0.000150376	.	.	.
1	16882605	ALU	TSD=TCTTTCTTTCTTTCTTTCTTTCTTT;ASSESS=5;INTERNAL=null,null;SVTYPE=ALU;SVLEN=279;MEINFO=AluSg,1,280,+;DIFF=1:c20t,c57t,d65-66,c95t,i129a,g140a,c151t,a163g,c197g,c261t;LP=33;RP=42;RA=-0.348;PRIOR=false;SR=127;AF=0.000868056;AC=1	.	.	.	.	.	0.000868056	.
1	16907305	ALU	TSD=null;ASSESS=3;INTERNAL=RNU1-2,TERMINATOR;SVTYPE=ALU;SVLEN=281;MEINFO=AluY,0,281,+;DIFF=1:c8t,c57t,a105g,t133g,c138t,c142t,c150t,c154t,t163c,g168a,a171g,g199a,c206t,c218g,g269a;LP=120090;RP=60779;RA=0.982;PRIOR=false;SR=9942;AF=0.00255179;AC=17	.	.	.	0.00255179	.	.	.
1	17114639	ALU	TSD=AAGAAACGATG;ASSESS=5;INTERNAL=NM_007365,INTRONIC;SVTYPE=ALU;SVLEN=267;MEINFO=AluYa5,14,281,+;DIFF=0.96:t89c,c96a,g145a,c174t,g237c,i127a;LP=1099;RP=1267;RA=-0.205;PRIOR=false;SR=1547;AF=0.0623209;AC=87;GENE=PADI2	0.0583067	0.0623209	.	0.173822	0.047619	0.0295139	.
1	17127522	ALU	TSD=null;ASSESS=3;INTERNAL=NM_007365,PROMOTER;SVTYPE=ALU;SVLEN=279;MEINFO=AluY,1,280,-;DIFF=0.9:c20t,c23t,g75t,c78t,d83-93,t134c,g151a,g153a,c154t,g162a,g175a,c181t,c187g,g196t,g199t,g207a,c218g,c238t,c243t;LP=84;RP=275;RA=-1.711;PRIOR=false;SR=124;AF=0.000199681;AC=1	0.000199681	.	.	.	.	.	.
1	17129946	ALU	TSD=AAAAAAAAAAAAAAAAAAAAAAAA;ASSESS=5;INTERNAL=null,null;SVTYPE=ALU;SVLEN=279;MEINFO=AluSz,1,280,+;DIFF=1:g5a,g9a,g11a,g54a,c57t,t65g,g67t,g74a,g81a,c85t,c94t,g104a,c111t,i129a,g140a,c153g,c155t,c197t,g215a,g232a,c237a,c239t,c261t,c277t;LP=52;RP=58;RA=-0.158;PRIOR=false;SR=34;AF=0.0199653;AC=23	.	.	.	0.00810567	.	0.0199653	.
1	17207079	ALU	TSD=GGCCCCCTTCTTCTT;ASSESS=5;INTERNAL=NM_013358,INTRONIC;SVTYPE=ALU;SVLEN=261;MEINFO=AluY,20,281,-;DIFF=0.99:g5a,g21a,c57t,c64t,c98t,g196c,g199t,c206t;LP=46;RP=85;RA=-0.886;PRIOR=false;SR=27;AF=0.000599042;AC=3	0.000599042	.	.	0.00195137	.	.	.
1	17234226	ALU	TSD=AAAAATATTTATTGT;ASSESS=5;INTERNAL=PADI1,INTRONIC;SVTYPE=ALU;SVLEN=281;MEINFO=AluYb8,0,281,+;DIFF=1:c57t,c64t,c98a,t144c,g211a,c236t,c248g,i252gcagtcc,g253a,a252g;LP=8;RP=13;RA=-0.7;PRIOR=false;SR=13;AF=0.000150105;AC=1	.	.	.	0.000150105	.	.	.
1	17265355	ALU	TSD=AGACAAGAATGTT;ASSESS=5;INTERNAL=NM_016233,INTRONIC;SVTYPE=ALU;SVLEN=281;MEINFO=AluYb8,0,281,+;DIFF=1:c57t,c64t,c98a,t144c,g211a,c230t,c236t,i252gcagtcc,c248g,a252g;LP=59;RP=69;RA=-0.226;PRIOR=false;SR=63;AF=0.002149;AC=3;GENE=PADI3	0.00439297	0.002149	.	0.00930651	.	.	.
1	17289330	SVA	TSD=null;ASSESS=4;INTERNAL=MIR3972,TERMINATOR;SVTYPE=SVA;SVLEN=1236;MEINFO=SVA,79,1315,+;DIFF=0.03:n1-78,c103t,a105g,g110a,n114,n116-1316;LP=82;RP=3579;RA=-5.448;PRIOR=false;SR=10157;AF=0.196488;AC=1309	.	.	.	0.196488	.	.	.
1	17291236	SVA	TSD=AAAAATTCTAAACAA;ASSESS=5;INTERNAL=null,null;SVTYPE=SVA;SVLEN=1240;MEINFO=SVA,75,1315,-;DIFF=0.37:n1-828,g840c,t847g,t862c,g880c,n937,g938a,c945a,t970c,t985c,g1009t,a1053g,g1067a,a1079g,t1100g,c1129g,c1146a,c1163a,c1164t,t1267c,g1268a,g1310t;LP=174;RP=615;RA=-1.821;PRIOR=false;SR=735;AF=0.0272206;AC=38	0.0183706	0.0272206	.	0.0568898	0.00793651	.	.
1	17291236	ALU	TSD=AAAAATTCTAAACAA;ASSESS=5;INTERNAL=null,null;SVTYPE=ALU;SVLEN=279;MEINFO=AluSz,1,280,-;DIFF=1:c8t,g54a,c57t,t65g,i129a,g140a,c153g,a163g,c197g,g219c,c277t;LP=29;RP=37;RA=-0.351;PRIOR=false;SR=30;AF=0.00347222;AC=4	0.00698882	.	.	.	.	0.00347222	.
1	17324168	ALU	TSD=TTTTTTTTGTTTTTTTTTTTTT;ASSESS=5;INTERNAL=NM_012387,INTRONIC;SVTYPE=ALU;SVLEN=279;MEINFO=AluSg,1,280,-;DIFF=1:g5a,c57t,d65-66,i129a,g152a,c155a,g215a,c239t,g272a,c277t;LP=28;RP=14;RA=1;PRIOR=false;SR=14;AF=0.00347222;AC=4	.	.	.	.	.	0.00347222	.
1	17357592	SVA	TSD=GCAAGTAGATATTTTT;ASSESS=5;INTERNAL=NM_012387,INTRONIC;SVTYPE=SVA;SVLEN=1314;MEINFO=SVA,2,1316,-;DIFF=0.25:n1-912,g938a,c945a,g1005c,g1009t,a1053g,g1067a,a1079g,g1268a,c1289g,t1292c,n1308,n1314-1316;LP=12;RP=1;RA=3.585;PRIOR=false;SR=11;AF=0.000716332;AC=1;GENE=PADI4	0.000199681	0.000716332	.	.	.	.	.
1	17434699	SVA	TSD=AAGATGAGGAAATCT;ASSESS=5;INTERNAL=RCC2,INTRONIC;SVTYPE=SVA;SVLEN=908;MEINFO=SVA,407,1315,+;DIFF=0.35:n1-410,n412,n425,n429,n439,n443-446,n449-450,n452,n455-456,i478gt,t478c,c479a,a480g,g481c,a487t,a513g,a561c,t564c,a578g,t580c,t582c,g588c,n647-681,i703gt,t703c,c704a,a705g,g706c,c712g,t729c,g762a,g764c,a773g,n800-1043,a1053g,n1056,g1067a,a1079g,c1129g,c1146a,c1163a,c1164t,t1267c,g1268a,g1310t;…	.	.	.	0.000150105	.	.	.
1	17494359	SVA	TSD=null;ASSESS=3;INTERNAL=null,null;SVTYPE=SVA;SVLEN=1240;MEINFO=SVA,75,1315,+;DIFF=0.18:n1-74,a78c,c126t,c158t,a167g,g192c,t193c,c201t,t202g,c205t,d212,a218g,g219a,t221a,g225a,a231g,c232t,t236c,g250a,c253t,g254a,t258a,t269c,g271t,g274t,g278a,n291-294,c320t,t324c,c326t,a327g,n347,n355,t366c,n387-1316;LP=7;RP=2;RA=1.807;PRIOR=false;SR=2;AF=0.000868056;AC=1	0.000199681	.	.	.	.	0.000868056	.
1	17506984	ALU	TSD=null;ASSESS=4;INTERNAL=null,null;SVTYPE=ALU;SVLEN=279;MEINFO=AluY,1,280,+;DIFF=0.96:c20t,c57t,c98t,g110a,g143a,g162a,g196c,g199t,c218g;LP=107;RP=131;RA=-0.292;PRIOR=false;SR=5;AF=0.00173611;AC=2	.	.	.	.	.	0.00173611	.
1	17526244	SVA	TSD=null;ASSESS=4;INTERNAL=null,null;SVTYPE=SVA;SVLEN=392;MEINFO=SVA,923,1315,-;DIFF=0.28:n1-922,a931g,a934t,g938a,c945a,g1009t,c1019t,a1041g,a1053g,g1067a,a1068g,a1079g,a1102g,a1116g,c1129g,a1132g,c1157t,a1178g,g1268a,t1292c;LP=14;RP=1;RA=3.807;PRIOR=false;SR=3;AF=0.000716332;AC=1;GENE=ARHGEF10L	.	0.000716332	.	.	.	.	.
1	17553370	ALU	TSD=AAGATTTCAGGTTTCT;ASSESS=5;INTERNAL=NM_018125,INTRONIC;SVTYPE=ALU;SVLEN=262;MEINFO=AluYb8,19,281,-;DIFF=1:c57t,c64t,c98a,t144c,g211a,c236t,c248g,i252gcagtcc,a252g;LP=26;RP=33;RA=-0.344;PRIOR=false;SR=16;AF=0.000199681;AC=1	0.000199681	.	.	.	.	.	.
1	17633330	SVA	TSD=null;ASSESS=4;INTERNAL=NM_001011722,INTRONIC;SVTYPE=SVA;SVLEN=1240;MEINFO=SVA,75,1315,+;DIFF=0.24:n1-1121,c1129g,c1146a,c1163a,c1164t,g1184a,t1267c,g1268a,g1310t;LP=5;RP=7;RA=-0.485;PRIOR=false;SR=2;GENE=ARHGEF10L;AF=0.000199681;AC=1	0.000199681	.	.	.	.	.	.
1	17661900	ALU	TSD=AGAAACCTGAGAGGG;ASSESS=5;INTERNAL=NM_001011722,INTRONIC;SVTYPE=ALU;SVLEN=278;MEINFO=AluY,3,281,+;DIFF=1:NoDifferences;LP=162;RP=164;RA=-0.018;PRIOR=false;SR=171;AF=0.00716332;AC=10;GENE=ARHGEF10L	0.00559105	0.00716332	.	0.0144101	.	.	.
1	17944621	ALU	TSD=TGGTTACCTTTCTTT;ASSESS=5;INTERNAL=null,null;SVTYPE=ALU;SVLEN=280;MEINFO=AluYb7_2,1,281,-;DIFF=1:c57t,c64t,c98a,g211a,c236t,i252gcagtcc,c248g,a252g;LP=1321;RP=1227;RA=0.106;PRIOR=false;SR=1186;AF=0.0680516;AC=95	0.0469249	0.0680516	.	0.158061	0.0238095	0.0130208	.
1	17961197	ALU	TSD=AAAAGGGCAGAGTTCT;ASSESS=5;INTERNAL=LINC01654,PROMOTER;SVTYPE=ALU;SVLEN=77;MEINFO=AluYa,204,281,+;DIFF=0.47:g237c;LP=2;RP=3;RA=-0.585;PRIOR=false;SR=10;AF=0.000150105;AC=1	.	.	.	0.000150105	.	.	.
1	17974719	LINE1	TSD=GAAAAATGAATGA;ASSESS=5;INTERNAL=null,null;SVTYPE=LINE1;SVLEN=6019;MEINFO=L1Ta1d,0,6019,+;DIFF=0.14:n492-6019;LP=13;RP=10;RA=0.379;ISTP=0;PRIOR=false;SR=16;AF=0.000199681;AC=1	0.000199681	.	.	.	.	.	.
1	17987372	ALU	TSD=CTCTCTGTCTTCTCTT;ASSESS=5;INTERNAL=null,null;SVTYPE=ALU;SVLEN=279;MEINFO=AluYb8,2,281,-;DIFF=1:c57t,c64t,c98a,t144c,g211a,c236t,c248g,i252gcagtcc,g253a,a252g;LP=4;RP=12;RA=-1.585;PRIOR=false;SR=7;AF=0.000199681;AC=1	0.000199681	.	.	.	.	.	.
1	17992875	ALU	TSD=GGGCAGTGACTTTT;ASSESS=5;INTERNAL=null,null;SVTYPE=ALU;SVLEN=280;MEINFO=AluYb3a1,1,281,-;DIFF=1:a28g,c57t,c64t,t144c,c174g,g211a,c236t,i252gcagtcc,c248g,a252g;LP=9;RP=10;RA=-0.152;PRIOR=false;SR=13;AF=0.000716332;AC=1	0.000199681	0.000716332	.	.	.	.	.
1	18005009	ALU	TSD=GGAAACTTGGTTTT;ASSESS=5;INTERNAL=null,null;SVTYPE=ALU;SVLEN=280;MEINFO=AluYb3a1,1,281,-;DIFF=1:c57t,c98a,t134c,t144c,g211a,g214a,c236t,c248g,a252g;LP=214;RP=224;RA=-0.066;PRIOR=false;SR=232;AF=0.0100287;AC=14;GENE=LOC105376809	0.00778754	0.0100287	.	0.030021	.	0.00173611	.
1	18078558	ALU	TSD=AAAGATGCTTGCTTG;ASSESS=5;INTERNAL=NR_125946,TERMINATOR;SVTYPE=ALU;SVLEN=280;MEINFO=AluYb8,1,281,+;DIFF=1:c57t,c64t,c98a,i119aaaa,t144c,g211a,c236t,i252gcagtcc,d281,c248g,a252g;LP=10;RP=13;RA=-0.379;PRIOR=false;SR=18;AF=0.000199681;AC=1	0.000199681	.	.	.	.	.	.
1	18137108	LINE1	TSD=AGCACTGGCATCTGTTTCT;ASSESS=5;INTERNAL=IGSF21,INTRONIC;SVTYPE=LINE1;SVLEN=3263;MEINFO=L1Ambig,2756,6019,-;DIFF=0.07:n1-2816,g2823t,n3230-6019;LP=43;RP=55;RA=-0.355;ISTP=0;PRIOR=false;SR=49;AF=0.000450315;AC=3	.	.	.	0.000450315	.	.	.
1	18160222	ALU	TSD=AGAAAAGCCTCACTGG;ASSESS=5;INTERNAL=NM_032880,INTRONIC;SVTYPE=ALU;SVLEN=56;MEINFO=AluYb,225,281,+;DIFF=0.97:g54a,c142t,c154t,g199t,c206t,c213t,c218g,t219a,c236t,c248g,i252gcagtcc,a252g;LP=11;RP=13;RA=-0.241;PRIOR=false;SR=8;AF=0.000716332;AC=1;GENE=IGSF21	.	0.000716332	.	.	.	.	.
1	18166209	ALU	TSD=GCTTTTA;ASSESS=5;INTERNAL=IGSF21,INTRONIC;SVTYPE=ALU;SVLEN=280;MEINFO=AluYc1,1,281,-;DIFF=0.99:g148a,a210g,t219c,c236t,d264;LP=40;RP=46;RA=-0.202;PRIOR=false;SR=64;AF=0.000750525;AC=5	.	.	.	0.000750525	.	.	.
1	18171684	ALU	TSD=AAACAAAAGCC;ASSESS=5;INTERNAL=NM_032880,INTRONIC;SVTYPE=ALU;SVLEN=281;MEINFO=AluYa4_5,0,281,+;DIFF=1:t89c,c96a,g145a,c174t,c236t;LP=42;RP=57;RA=-0.441;PRIOR=false;SR=43;AF=0.000599042;AC=3	0.000599042	.	.	0.00060042	.	.	.
1	18284894	ALU	TSD=AAAACCCTCCTTGC;ASSESS=5;INTERNAL=NM_032880,INTRONIC;SVTYPE=ALU;SVLEN=207;MEINFO=AluYa,74,281,+;DIFF=0.74:t89c,i94aa,c96a,g145a,c174t,g237c,c260a;LP=22;RP=62;RA=-1.495;PRIOR=false;SR=56;AF=0.00286533;AC=4;GENE=IGSF21	0.00399361	0.00286533	0.00944245	0.00315221	0.015873	0.0182292	.
1	18423360	ALU	TSD=GTCTTTTGCTATCTT;ASSESS=5;INTERNAL=IGSF21,TERMINATOR;SVTYPE=ALU;SVLEN=279;MEINFO=AluYe,2,281,-;DIFF=0.99:t144a,g207a,a210g,t219c,c236t,d265;LP=11;RP=12;RA=-0.126;PRIOR=false;SR=13;AF=0.000150105;AC=1	.	.	.	0.000150105	.	.	.
1	18510452	ALU	TSD=AAAAAAAAAAAAAAAAAAAAAAAA;ASSESS=5;INTERNAL=null,null;SVTYPE=ALU;SVLEN=279;MEINFO=AluY,1,280,+;DIFF=0.97:g5a,g11a,c20t,a76t,c78t,t86g,t101a,c218t,c275t;LP=24;RP=107;RA=-2.157;PRIOR=false;SR=40;AF=0.00347222;AC=4	.	.	.	.	.	0.00347222	.
1	18511488	ALU	TSD=null;ASSESS=4;INTERNAL=null,null;SVTYPE=ALU;SVLEN=269;MEINFO=AluY,11,280,+;DIFF=0.96:NoDifferences;LP=67;RP=122;RA=-0.865;PRIOR=false;SR=3;AF=0.000199681;AC=1	0.000199681	.	.	.	.	.	.
1	18568187	SVA	TSD=AAAAAATGTCACATAC;ASSESS=5;INTERNAL=null,null;SVTYPE=SVA;SVLEN=851;MEINFO=SVA,465,1316,+;DIFF=0.21:n1-409,n412-414,n416,n418,n420-421,n424,n426,n428-429,n431,n437,n443,n448-449,n455,n457,n460,n464,g476t,n477-479,a480g,a487t,a513g,a561c,t564c,a578g,t580c,t582c,a653g,i658c,a668g,c677t,c678g,g681a,t729c,g764c,n768-768,a773g,n795-953,t970c,n984,t985c,n999-999,g1009t,n1015,n1021,n1026,n1044,a1053g,…	0.00778754	0.0100287	.	.	.	0.000868056	.
1	18818315	ALU	TSD=TCTGCAGATACATTCT;ASSESS=5;INTERNAL=null,null;SVTYPE=ALU;SVLEN=275;MEINFO=AluYb8,6,281,-;DIFF=1:g25a,c57t,c64t,c98a,t144c,g211a,c236t,g239a,i252gcagtcc,c248g,a252g;LP=47;RP=43;RA=0.128;PRIOR=false;SR=54;AF=0.002149;AC=3	0.00339457	0.002149	.	0.00870609	.	.	.
1	18853397	ALU	TSD=AAAAGAAAAGT;ASSESS=5;INTERNAL=TAS1R2,INTRONIC;SVTYPE=ALU;SVLEN=247;MEINFO=AluYa,34,281,+;DIFF=0.88:t89c,c96a,g145a,c174t,g237c,i127a;LP=55;RP=57;RA=-0.052;PRIOR=false;SR=67;AF=0.000750525;AC=5	.	.	.	0.000750525	.	.	.
1	18894886	ALU	TSD=null;ASSESS=4;INTERNAL=NM_003748,INTRONIC;SVTYPE=ALU;SVLEN=279;MEINFO=AluY,1,280,-;DIFF=0.97:g9a,c10t,g49a,g175a,c213t,g239a,c260t,g261a,g269a,c276t;LP=13;RP=11;RA=0.241;PRIOR=false;SR=6;AF=0.00143266;AC=2;GENE=ALDH4A1	.	0.00143266	.	.	.	0.00868056	.
1	19001392	ALU	TSD=AAAAAAAAAAAAGAGAGAGAGA;ASSESS=5;INTERNAL=null,null;SVTYPE=ALU;SVLEN=279;MEINFO=AluY,1,280,+;DIFF=0.97:g5a,g9a,g11a,g49a,c57t,c78a,c83a,c109t,c138t,c142t,c150t,g153a,g199t,c206t,c218g,g231a,g237a,g239a,c260t,g277a,d281;LP=57;RP=58;RA=-0.025;PRIOR=false;SR=6;AF=0.00954861;AC=11	.	.	.	.	.	0.00954861	.
1	19031043	ALU	TSD=null;ASSESS=3;INTERNAL=UBR4,TERMINATOR;SVTYPE=ALU;SVLEN=279;MEINFO=AluY,1,280,-;DIFF=0.99:c78t,c98t,g143a,g151a,c154t,c174t,g196c,g199t,g214a,c236t,g237a,c238t,c243t,c268t,c273a,g277a,d281;LP=29;RP=19;RA=0.61;PRIOR=false;SR=18;AF=0.000150105;AC=1	.	.	.	0.000150105	.	.	.
1	19037189	LINE1	TSD=GACCCTGTCTTT;ASSESS=5;INTERNAL=null,null;SVTYPE=LINE1;SVLEN=-1;MEINFO=L1Ambig,-1,6019,-;DIFF=0.1:n1-3718,c3863t,g3984a,a4107t,n4154-6019;LP=53;RP=83;RA=-0.647;ISTP=4107;PRIOR=false;SR=54;AF=0.00358166;AC=5;GENE=LOC105376815	0.00159744	0.00358166	.	0.00255179	.	.	.
1	19104441	ALU	TSD=null;ASSESS=3;INTERNAL=UBR4,INTRONIC;SVTYPE=ALU;SVLEN=279;MEINFO=AluY,1,280,+;DIFF=0.47:c4t,g21a,c57t,g175a,g207a,g212a,g237a,c260t,g265a,g269a,c273t,c276t,d281;LP=5;RP=3;RA=0.737;PRIOR=false;SR=1;AF=2.06173e-05;AC=2	.	.	.	.	.	.	2.06173e-05
1	19107039	LINE1	TSD=null;ASSESS=4;INTERNAL=UBR4,INTRONIC;SVTYPE=LINE1;SVLEN=5956;MEINFO=L1Ambig,62,6018,+;DIFF=0.01:n1-4325,c4349a,g4359t,n4402-4469,n4546-4606,a4638c,n4680-6019;LP=5;RP=6;RA=-0.263;ISTP=-1;PRIOR=false;SR=2;AF=1.00735e-05;AC=1	.	.	.	.	.	.	1.00735e-05
1	19117487	ALU	TSD=AAAAATTCATCAGTGTA;ASSESS=5;INTERNAL=UBR4,INTRONIC;SVTYPE=ALU;SVLEN=279;MEINFO=AluY,1,280,-;DIFF=0.96:g99a,c174t,c260t,c268t,t274c,c276t;LP=15;RP=3;RA=2.322;PRIOR=false;SR=9;AF=3.02243e-05;AC=3	.	.	.	.	.	.	3.02243e-05
1	19132625	ALU	TSD=AAAAAAAAAAAAAAAAAAAA;ASSESS=5;INTERNAL=NM_020765,INTRONIC;SVTYPE=ALU;SVLEN=279;MEINFO=AluSz,1,280,+;DIFF=1:g5a,c8t,c53t,t65g,c95t,i129a,c143t,g152a,c153g,c155t,c175t,c197t,c207t,g208a,c269t,c277t;LP=22;RP=16;RA=0.459;PRIOR=false;SR=34;AF=0.0945559;AC=132;GENE=UBR4	0.110623	0.0945559	.	.	.	.	.
1	19159911	ALU	TSD=CCAATTCTCTTCTTTT;ASSESS=5;INTERNAL=NM_020765,INTRONIC;SVTYPE=ALU;SVLEN=272;MEINFO=AluY,9,281,-;DIFF=1:a95g,i127aaa;LP=84;RP=93;RA=-0.147;PRIOR=false;SR=68;AF=0.0200573;AC=28;GENE=UBR4	0.0257588	0.0200573	.	0.018613	.	.	.
1	19177261	ALU	TSD=AAAAAATGCATC;ASSESS=5;INTERNAL=UBR4,INTRONIC;SVTYPE=ALU;SVLEN=281;MEINFO=AluYa4_5,0,281,+;DIFF=1:t89c,c96a,g145a,c174t,c236t;LP=31;RP=37;RA=-0.255;PRIOR=false;SR=38;AF=0.000450315;AC=3	.	.	.	0.000450315	.	.	.
1	19180541	ALU	TSD=null;ASSESS=3;INTERNAL=UBR4,INTRONIC;SVTYPE=ALU;SVLEN=279;MEINFO=AluSg,1,280,+;DIFF=0.81:g5a,c10t,c18t,c20a,c48t,g52a,c53t,c57t,g58a,d65-66,g75a,c85a,c94a,g101a,i129a,g140a,g144a,g147a,c151t,c153t,c155t,g187a,c207t,g208a,g232a,g238a,c239t,t257c,g268a,c277t,g278a;LP=4;RP=6;RA=-0.585;PRIOR=false;SR=2;AF=0.002852;AC=19	.	.	.	0.002852	.	.	.
1	19195291	ALU	TSD=AATAATAATAATAATAATAATAATA;ASSESS=5;INTERNAL=NM_020765,INTRONIC;SVTYPE=ALU;SVLEN=279;MEINFO=AluY,1,280,-;DIFF=0.94:g9a,g11a,a76t,c78t,t86g,c98t,g155a,g175a,g196c,g199t,g207a,c236t,g239a,c263t,c268t,g277a,d281;LP=41;RP=39;RA=0.072;PRIOR=false;SR=18;AF=0.00178571;AC=2	.	.	.	.	.	0.00178571	.
1	19200268	SVA	TSD=null;ASSESS=3;INTERNAL=UBR4,INTRONIC;SVTYPE=SVA;SVLEN=1240;MEINFO=SVA,75,1315,+;DIFF=0.15:n1-74,a78c,c126t,c158t,a167g,g192c,t193c,c201t,t202g,c205t,g219a,t221a,g225a,a231g,c232t,g241c,g250a,c253t,t269c,g271t,n283-1316;LP=9;RP=1;RA=3.17;PRIOR=false;SR=1;AF=0.000150105;AC=1	.	.	.	0.000150105	.	.	.
1	19216242	ALU	TSD=AAAAAAAAA;ASSESS=5;INTERNAL=NM_015047,3_UTR;SVTYPE=ALU;SVLEN=279;MEINFO=AluY,1,280,+;DIFF=0.98:g9a,c10t,g58a,a76t,t86g,t93c,c98t,c154t,g162a,c174t,c198t,g214a,c230t,g237t,c238a,g239a,c260t,g261a,g267a,g269a;LP=55;RP=81;RA=-0.558;PRIOR=false;SR=91;AF=0.196181;AC=226	.	.	.	0.255179	0.166667	0.196181	.
1	19229286	ALU	TSD=CCTAAATTTTT;ASSESS=5;INTERNAL=NM_015047,INTRONIC;SVTYPE=ALU;SVLEN=215;MEINFO=AluY,66,281,-;DIFF=1:c48t,g54a,c57t,c98a,g199t,c218g;LP=58;RP=21;RA=1.466;PRIOR=false;SR=13;AF=0.000199681;AC=1	0.000199681	.	.	.	.	.	.
1	19359232	ALU	TSD=null;ASSESS=4;INTERNAL=CAPZB,INTRONIC;SVTYPE=ALU;SVLEN=278;MEINFO=AluY,2,280,-;DIFF=0:c8t,g11t,c18t,t24c,c47t,c53t,c62a,g99a,c109t,g145a,g151a,c154t,c156a,c169t,c187t,a188g,g192a;LP=2;RP=3;RA=-0.585;PRIOR=false;SR=3;AF=0.0030021;AC=20	.	.	.	0.0030021	.	.	.
1	19460597	ALU	TSD=TTTTTTTTTTTTTTTTTTTTTTT;ASSESS=5;INTERNAL=NM_001206540,INTRONIC;SVTYPE=ALU;SVLEN=269;MEINFO=AluSz,11,280,-;DIFF=0.72:c16t,t65g,g81a,i129a,g140a,c153t,g156a,g176a,g190t,c207t,g208a,g215a,g219c,c237t,c239t;LP=81;RP=70;RA=0.211;PRIOR=false;SR=115;AF=0.110243;AC=127	.	.	.	0.159862	.	0.110243	.
1	19491045	ALU	TSD=null;ASSESS=3;INTERNAL=CAPZB,PROMOTER;SVTYPE=ALU;SVLEN=247;MEINFO=AluYc1,34,281,-;DIFF=1:c98t,g148a;LP=21;RP=19;RA=0.144;PRIOR=false;SR=5;AF=0.00044964;AC=1	.	.	0.00044964	.	.	.	.
1	19491053	ALU	TSD=TTTTTTTT;ASSESS=5;INTERNAL=NM_001206540,PROMOTER;SVTYPE=ALU;SVLEN=280;MEINFO=AluYc1,1,281,-;DIFF=1:c98t,g148a;LP=212;RP=185;RA=0.197;PRIOR=false;SR=211;AF=0.0121777;AC=17	0.0113818	0.0121777	.	0.00195137	0.0238095	0.0190972	.
1	19519229	ALU	TSD=null;ASSESS=3;INTERNAL=CAPZB,PROMOTER;SVTYPE=ALU;SVLEN=279;MEINFO=AluY,1,280,+;DIFF=0.96:g11a,c98t,g110a,c138t,g141a,c150t,c154t,g155a,c164a,g214a,g228a,g237a,g239a,c243t,g261a,g269a,g271a,c273t;LP=10;RP=11;RA=-0.138;PRIOR=false;SR=1;AF=0.00030021;AC=2	.	.	.	0.00030021	.	.	.
1	19524726	ALU	TSD=null;ASSESS=3;INTERNAL=null,null;SVTYPE=ALU;SVLEN=279;MEINFO=AluY,1,280,+;DIFF=0.97:g11a,g79a,c98t,c138t,g199t,c238t,c268t,g271c,c276t,g277a;LP=31;RP=49;RA=-0.661;PRIOR=false;SR=4;AF=0.00347222;AC=4	.	.	.	.	.	0.00347222	.
1	19571798	ALU	TSD=GGATTAGTGCTTTTCT;ASSESS=5;INTERNAL=null,null;SVTYPE=ALU;SVLEN=280;MEINFO=AluYa5c1,1,281,-;DIFF=1:t89c,c96a,c142t,g145a,c174t,a234g,g237c;LP=415;RP=399;RA=0.057;PRIOR=false;SR=443;AF=0.019341;AC=27	0.0117812	0.019341	.	0.0438307	.	0.00347222	.
1	19632729	LINE1	TSD=TTTTTTTTTTTTTTTTTTT;ASSESS=5;INTERNAL=NM_001204088,INTRONIC;SVTYPE=LINE1;SVLEN=1731;MEINFO=L1Ambig,4287,6018,+;DIFF=0.01:n1-5931,a5989t,g6014a;LP=25;RP=17;RA=0.556;ISTP=0;PRIOR=false;SR=6;AF=0.00520833;AC=6	.	.	.	.	.	0.00520833	.
1	19662632	ALU	TSD=TTTTTTT;ASSESS=5;INTERNAL=NM_000871,PROMOTER;SVTYPE=ALU;SVLEN=279;MEINFO=AluY,1,280,+;DIFF=0.95:c150t,g155a,g199t,c218g,c236t,g239a,g261a,c268t;LP=36;RP=78;RA=-1.115;PRIOR=false;SR=9;AF=0.00347222;AC=4	.	.	.	.	.	0.00347222	.
1	19671824	LINE1	TSD=GGAAATGGGCTTTTA;ASSESS=5;INTERNAL=NM_000871,INTRONIC;SVTYPE=LINE1;SVLEN=6017;MEINFO=L1Ta,2,6019,-;DIFF=0.11:n1-5542,n5846;LP=16;RP=25;RA=-0.644;ISTP=0;PRIOR=false;SR=22;GENE=HTR6;AF=0.000199681;AC=1	0.000199681	.	.	.	.	.	.
1	19714627	ALU	TSD=CAGTTTTCTCTTTT;ASSESS=5;INTERNAL=NM_181719,INTRONIC;SVTYPE=ALU;SVLEN=278;MEINFO=AluY,3,281,-;DIFF=0.98:c4t,g49a,c57t,t93c,c98t,c206t,c230t,c236t,d281;LP=67;RP=72;RA=-0.104;PRIOR=false;SR=19;AF=0.000199681;AC=1	0.000199681	.	.	.	.	.	.
1	19755844	LINE1	TSD=null;ASSESS=4;INTERNAL=TMCO4,INTRONIC;SVTYPE=LINE1;SVLEN=3650;MEINFO=L1Ambig,2368,6018,+;DIFF=0.04:n1-4095,c4111t,a4117c,c4130a,t4140a,n4177,n4213-6019;LP=8;RP=3;RA=1.415;ISTP=-1;PRIOR=false;SR=2;AF=1.00737e-05;AC=1	.	.	.	.	.	.	1.00737e-05
1	19784845	ALU	TSD=null;ASSESS=3;INTERNAL=NM_181719,INTRONIC;SVTYPE=ALU;SVLEN=279;MEINFO=AluY,1,280,-;DIFF=1:c4t,g5a,g9a,g54a,c57t,c98t,g143a,g196c,g199t,c206t,g214a,g237a,g269a,c276t,g277a;LP=38;RP=38;RA=0;PRIOR=false;SR=42;AF=0.00694444;AC=8	.	.	.	.	.	0.00694444	.
1	19788392	SVA	TSD=AGAAAGTTATTTTGTG;ASSESS=5;INTERNAL=NM_181719,INTRONIC;SVTYPE=SVA;SVLEN=1240;MEINFO=SVA,75,1315,+;DIFF=0.24:n1-862,g880c,t889c,g938a,c945a,t970c,t985c,c990t,g1009t,a1053g,g1067a,a1079g,c1129g,c1146a,c1163a,c1164t,t1267c,g1268a,g1310t;LP=1;RP=20;RA=-4.322;PRIOR=false;SR=16;GENE=TMCO4;AF=0.000399361;AC=2	0.000399361	.	.	.	.	.	.
1	19828928	ALU	TSD=null;ASSESS=4;INTERNAL=null,null;SVTYPE=ALU;SVLEN=275;MEINFO=AluSz,5,280,+;DIFF=0.8:g9a,g21a,c57t,c64t,t65g,t78a,c80t,g88t,i129a,c143t,c153g,c237t,c239t,g246a,g254a,c261a,g270a,c277t;LP=37;RP=56;RA=-0.598;PRIOR=false;SR=2;AF=0.00694444;AC=8	.	.	.	.	.	0.00694444	.
1	19838148	ALU	TSD=null;ASSESS=3;INTERNAL=RNF186,PROMOTER;SVTYPE=ALU;SVLEN=279;MEINFO=AluY,1,280,+;DIFF=0.67:g5a,g11a,g49a,c57t,g199a,c206t,g214a,c230t,g237a,g239a,g261a,g269a;LP=8;RP=11;RA=-0.459;PRIOR=false;SR=3;AF=0.0103573;AC=69	.	.	.	0.0103573	.	.	.
1	19930605	ALU	TSD=GACCCTGAGAACTTTT;ASSESS=5;INTERNAL=NM_014589,PROMOTER;SVTYPE=ALU;SVLEN=280;MEINFO=AluYa5,1,281,-;DIFF=1:t89c,c96a,g145a,c174t,g237c;LP=1739;RP=1418;RA=0.294;PRIOR=false;SR=1927;AF=0.0787966;AC=110	0.0714856	0.0787966	0.0642986	0.022816	0.119048	0.12934	.
1	19970822	ALU	TSD=AAAAAAATCCCAAGT;ASSESS=5;INTERNAL=NM_001161729,TERMINATOR;SVTYPE=ALU;SVLEN=281;MEINFO=AluYa1_1,0,281,+;DIFF=1:g145a,g269a;LP=12;RP=6;RA=1;PRIOR=false;SR=7;AF=0.000199681;AC=1	0.000199681	.	.	.	.	.	.
1	19991502	ALU	TSD=null;ASSESS=3;INTERNAL=null,null;SVTYPE=ALU;SVLEN=269;MEINFO=AluSz,11,280,+;DIFF=0.95:c22a,t39g,g43c,g49a,c53t,g58a,t65g,g70a,g81a,g93a,t100c,t103a,c128a,c139t,c151t,g154a,c155t,c175t,c197t,g208a,g215a,c223t,a224t,c231t,c237t,g240a,c244t,g262a,d266-282,i127a;LP=32;RP=131;RA=-2.033;PRIOR=false;SR=182;AF=0.0061901;AC=31	0.0061901	.	.	.	.	.	.
1	19991506	ALU	TSD=AAAA;ASSESS=5;INTERNAL=null,null;SVTYPE=ALU;SVLEN=269;MEINFO=AluSz,11,280,+;DIFF=0.91:c22a,t39g,g43c,g49a,c53t,g58a,t65g,g70a,g81a,g93a,t100c,t103a,c128a,c139t,c151t,g154a,c155t,c175t,c197t,g208a,g215a,c223t,c231t,g240a,c244t,g262a,d272-282,i127a;LP=12;RP=35;RA=-1.544;PRIOR=false;SR=54;AF=0.00644699;AC=9	.	0.00644699	.	.	.	.	.
1	19995239	ALU	TSD=GTTGTTGCCTTTCTTT;ASSESS=5;INTERNAL=null,null;SVTYPE=ALU;SVLEN=280;MEINFO=AluYc1,1,281,-;DIFF=1:g148a;LP=16;RP=14;RA=0.193;PRIOR=false;SR=16;AF=0.000716332;AC=1	0.000199681	0.000716332	.	.	.	.	.
1	19997599	ALU	TSD=CTTAAAGGCATTCTT;ASSESS=5;INTERNAL=null,null;SVTYPE=ALU;SVLEN=279;MEINFO=AluYa5,2,281,-;DIFF=1:t89c,c96a,g145a,c174t,g237c;LP=9;RP=16;RA=-0.83;PRIOR=false;SR=14;AF=0.00173611;AC=2	0.00419329	.	.	.	.	0.00173611	.
1	20000274	ALU	TSD=CTACTCCTCCTTACTCTT;ASSESS=5;INTERNAL=null,null;SVTYPE=ALU;SVLEN=279;MEINFO=AluYc1,2,281,-;DIFF=1:g148a;LP=18;RP=15;RA=0.263;PRIOR=false;SR=33;AF=0.000716332;AC=1	0.000199681	0.000716332	.	0.00135095	.	0.00260417	.
1	20024114	ALU	TSD=null;ASSESS=3;INTERNAL=PLA2G2A,PROMOTER;SVTYPE=ALU;SVLEN=279;MEINFO=AluY,1,280,+;DIFF=0.51:g9a,g11c,g12a,c47a,c48t,g49a,c53t,g54a,g55a,c57t,g58a,g59a,a76t,g79a,t86g,c87a,c98t,g102a,c137t,c138t,g140a,g141a,t147a,g153a,c154t,g162a,c174t,g175a,c230a,c238t,g265c;LP=2;RP=4;RA=-1;PRIOR=false;SR=1;AF=0.0412789;AC=275	.	.	.	0.0412789	.	.	.
1	20025894	ALU	TSD=0tsd;ASSESS=5;INTERNAL=PLA2G5,PROMOTER;SVTYPE=ALU;SVLEN=279;MEINFO=AluY,1,280,-;DIFF=0.97:c10t,c53a,c98t,g110a,c138t,g143a,g151a,g162a,c174t,g214a;LP=21;RP=27;RA=-0.363;PRIOR=false;SR=7;AF=0.00314748;AC=7	.	.	0.00314748	.	.	.	.
1	20086284	ALU	TSD=CCCATGTTTTCTT;ASSESS=5;INTERNAL=NM_000929,INTRONIC;SVTYPE=ALU;SVLEN=279;MEINFO=AluYb8,2,281,-;DIFF=1:c57t,c64t,c98a,t144c,g211a,c236t,i252gcagtcc,c248g,a252g;LP=14;RP=14;RA=0;PRIOR=false;SR=16;AF=0.000199681;AC=1	0.000199681	.	.	.	.	.	.
1	20131848	ALU	TSD=AAAAAAAAAAAAAAAAAAAAA;ASSESS=5;INTERNAL=NM_022819,PROMOTER;SVTYPE=ALU;SVLEN=279;MEINFO=AluY,1,280,-;DIFF=1:c4t,g5a,g9a,g58a,i65gt,t93c,c98t,c213t,g231a,c260a,c268t,g269a,g277a;LP=26;RP=59;RA=-1.182;PRIOR=false;SR=32;AF=0.00954861;AC=11	.	.	.	0.0115581	.	0.00954861	.
1	20265135	ALU	TSD=TTATTAGTATT;ASSESS=5;INTERNAL=VWA5B1,PROMOTER;SVTYPE=ALU;SVLEN=281;MEINFO=AluYc1,0,281,-;DIFF=1:g148a,c154t;LP=18;RP=20;RA=-0.152;PRIOR=false;SR=20;AF=0.00030021;AC=2	.	.	.	0.00030021	.	.	.
1	20271593	ALU	TSD=CACTTCTT;ASSESS=5;INTERNAL=VWA5B1,PROMOTER;SVTYPE=ALU;SVLEN=280;MEINFO=AluYb8,1,281,-;DIFF=1:c57t,c64t,c98a,t144c,g211a,c236t,i252gcagtcc,c248g,a252g;LP=17;RP=22;RA=-0.372;PRIOR=false;SR=22;AF=0.00030021;AC=2	.	.	.	0.00030021	.	.	.
1	20307810	ALU	TSD=null;ASSESS=3;INTERNAL=VWA5B1,INTRONIC;SVTYPE=ALU;SVLEN=279;MEINFO=AluSg,1,280,+;DIFF=0.64:g5a,c8t,g54a,d65-66,g67a,i133n,c143t,g152a,c153g,c155t,a163g,c207t,g216a,g218c,g219c,g227t,c230t,g232a,g238a,c239t,c255t,c261t,c269t,c277t,g278t;LP=3;RP=3;RA=0;PRIOR=false;SR=2;AF=0.000750525;AC=5	.	.	.	0.000750525	.	.	.
1	20321113	ALU	TSD=null;ASSESS=3;INTERNAL=NM_001039500,INTRONIC;SVTYPE=ALU;SVLEN=136;MEINFO=AluY,145,281,+;DIFF=1:c4t,g9a,g21a,c57t,c98t,c138t,c150t,c154t,g199t,c206t,c236t,c268t,c276t;LP=28;RP=57;RA=-1.026;PRIOR=false;SR=24;AF=0.0789931;AC=91	.	.	.	.	.	0.0789931	.
1	20321129	ALU	TSD=AAAAAAAAAAAAAAAA;ASSESS=5;INTERNAL=NM_001039500,INTRONIC;SVTYPE=ALU;SVLEN=279;MEINFO=AluY,1,280,+;DIFF=0.95:g5a,c236t,c238t;LP=14;RP=34;RA=-1.28;PRIOR=false;SR=15;AF=0.0479943;AC=67;GENE=VWA5B1	.	0.0479943	.	.	.	.	.
1	20368264	ALU	TSD=null;ASSESS=4;INTERNAL=LINC01141,INTRONIC;SVTYPE=ALU;SVLEN=279;MEINFO=AluY,1,280,+;DIFF=1:g5a,c10t,c20t,c53t,g54a,c64t,c138t,c174t,g175a,g199t,c218g,c236t,c276a;LP=32;RP=26;RA=0.3;PRIOR=false;SR=76;AF=0.00060042;AC=4	.	.	.	0.00060042	.	.	.
1	20368282	ALU	TSD=null;ASSESS=4;INTERNAL=LINC01141,INTRONIC;SVTYPE=ALU;SVLEN=279;MEINFO=AluY,1,280,+;DIFF=0.96:g54a,c57t,g72a,t86g,t93c,c98t,t147a,g162a,g237a,c238t,c260a,c268t,c273t,g277a;LP=57;RP=60;RA=-0.074;PRIOR=false;SR=88;GENE=LINC01141;AF=0.00044964;AC=1	.	.	0.00044964	.	.	.	.
1	20407458	ALU	TSD=AAAAATTGAAACTGG;ASSESS=5;INTERNAL=NR_033887,INTRONIC;SVTYPE=ALU;SVLEN=279;MEINFO=AluY,1,280,+;DIFF=1:g52a,c88t,c112t,g146t,c174t,c236t,c260a,g265c;LP=41;RP=29;RA=0.5;PRIOR=false;SR=10;AF=0.000199681;AC=1	0.000199681	.	.	.	.	.	.
1	20423284	ALU	TSD=null;ASSESS=3;INTERNAL=LINC01141,INTRONIC;SVTYPE=ALU;SVLEN=279;MEINFO=AluSq,1,280,+;DIFF=0.98:c4t,g11a,c20t,c48t,c57t,t65g,g75a,t78a,g88t,i129a,g144a,c153g,c175t,g176a,g219c,c231t,c237t,g238a,g240a,i265a,g270a,g272a;LP=11;RP=4;RA=1.459;PRIOR=false;SR=6;GENE=LINC01141;AF=0.0139388;AC=31	.	.	0.0139388	.	.	.	.
1	20458219	SVA	TSD=null;ASSESS=4;INTERNAL=CAMK2N1,TERMINATOR;SVTYPE=SVA;SVLEN=781;MEINFO=SVA,535,1316,+;DIFF=0.49:n1-442,c459t,g477a,a487c,c491t,g505a,a513g,n561,a578g,t580c,t582c,t584c,g608t,g615a,c618t,a653g,g664a,c667t,a668g,g681a,c684t,t729c,g730a,n757-949,g1009t,c1019t,a1053g,g1067a,a1079g,c1129g,c1157t,g1268a,t1292c;LP=37;RP=33;RA=0.165;PRIOR=false;SR=28;AF=0.000450315;AC=3	.	.	.	0.000450315	.	.	.
1	20473601	ALU	TSD=AGAAATGCCCAGACA;ASSESS=5;INTERNAL=NM_018584,TERMINATOR;SVTYPE=ALU;SVLEN=281;MEINFO=AluYa4_5,0,281,+;DIFF=1:t89c,c96a,g145a,c174t,g208t,c236t;LP=44;RP=45;RA=-0.032;PRIOR=false;SR=63;AF=0.002149;AC=3	0.000599042	0.002149	.	.	.	.	.
1	20528872	ALU	TSD=ACATCAAACTTCT;ASSESS=5;INTERNAL=null,null;SVTYPE=ALU;SVLEN=268;MEINFO=AluY,13,281,-;DIFF=1:c57t,i119aa,c260t,c268t,g269a,c276t,g277a;LP=50;RP=55;RA=-0.138;PRIOR=false;SR=12;AF=0.000199681;AC=1	0.000199681	.	.	.	.	.	.
1	20545853	SVA	TSD=GAGGAGAGGGATTTTT;ASSESS=5;INTERNAL=NM_207334,PROMOTER;SVTYPE=SVA;SVLEN=888;MEINFO=SVA,428,1316,-;DIFF=0.5:n1-408,n410-411,n414,g471t,t478g,c479g,a480g,i482tcagc,a487c,g492a,c504t,a513g,a561c,n564,n573,a578g,t580c,t582c,n583,a653g,a668g,i696tg,g702t,t703c,c704a,a705g,g706c,g717a,g764c,a773g,n800-801,g840c,t847g,t862c,g880c,g938a,c945a,n952-955,t970c,t985c,g1009t,a1053g,g1067a,a1079g,c1129g,c11…	0.000599042	.	.	.	.	.	.
1	20604188	ALU	TSD=AAACTTGGAATCAGG;ASSESS=5;INTERNAL=CDA,INTRONIC;SVTYPE=ALU;SVLEN=280;MEINFO=AluYa1_2,1,281,+;DIFF=1:g49a,g52a,c53t,g58a,c126t,g146t,c174t,g237c;LP=65;RP=22;RA=1.563;PRIOR=false;SR=21;AF=0.00030021;AC=2	.	.	.	0.00030021	.	.	.
1	20608427	ALU	TSD=TTTGTTTTGTTTTGTTT;ASSESS=5;INTERNAL=CDA,INTRONIC;SVTYPE=ALU;SVLEN=279;MEINFO=AluYa4_5,1,280,-;DIFF=0.88:t89c,c96a,g145a,c174t,c236t;LP=27;RP=17;RA=0.667;PRIOR=false;SR=43;AF=0.000150105;AC=1	.	.	.	0.000150105	.	.	.
1	20615485	ALU	TSD=AAAAAAAAAAAAAAA;ASSESS=5;INTERNAL=NM_001785,INTRONIC;SVTYPE=ALU;SVLEN=279;MEINFO=AluY,1,280,-;DIFF=0.81:c20t,a76t,c98t,g199t,c236t,g257a,g269a;LP=55;RP=40;RA=0.459;PRIOR=false;SR=47;AF=0.023639;AC=33;GENE=CDA	0.0720847	0.023639	0.0939748	0.140949	0.015873	0.106771	.
1	20618258	ALU	TSD=CACTGTTCAGTTTC;ASSESS=5;INTERNAL=NM_001785,INTRONIC;SVTYPE=ALU;SVLEN=280;MEINFO=AluYe,1,281,-;DIFF=0.99:t144a,i207ga,a210g,t219c,c236t,d264,d281;LP=6250;RP=5782;RA=0.112;PRIOR=false;SR=7142;AF=0.252865;AC=353;GENE=CDA	0.260982	0.252865	0.340827	0.311918	0.246032	0.258681	.
1	20645504	LINE1	TSD=null;ASSESS=4;INTERNAL=PINK1-AS,INTRONIC;SVTYPE=LINE1;SVLEN=4804;MEINFO=L1Ambig,1214,6018,+;DIFF=0.06:n1-5285,t5316a,t5325c,c5335g,n5362-5383,c5391t,t5447g,g5465a,n5493-5610,c5620g,n5687-6019;LP=7;RP=10;RA=-0.515;ISTP=-1;PRIOR=false;SR=3;AF=0.00295291;AC=293	.	.	.	.	.	.	0.00295291
1	20674591	ALU	TSD=TTTTTTTTTTTTTTTT;ASSESS=5;INTERNAL=NM_001287212,INTRONIC;SVTYPE=ALU;SVLEN=279;MEINFO=AluY,1,280,-;DIFF=0.61:c10t,c20t,c48t,c53a,g65a,c78t,g79a,g99a,g100a,g110a,a127c,c142t,g151a,c154t,g176a,c206t,g214a,c218g,g231a,g237a,g265a,c276t;LP=76;RP=121;RA=-0.671;PRIOR=false;SR=11;AF=0.00173611;AC=2	.	.	.	.	.	0.00173611	.
1	20678336	SVA	TSD=null;ASSESS=3;INTERNAL=KIF17,INTRONIC;SVTYPE=SVA;SVLEN=247;MEINFO=SVA,1068,1315,+;DIFF=0.18:n1-1067,a1079g,c1129g,c1157t,t1292c;LP=1;RP=11;RA=-3.459;PRIOR=false;SR=8;AF=0.00030021;AC=2	.	.	.	0.00030021	.	.	.
1	20739117	SVA	TSD=null;ASSESS=4;INTERNAL=HP1BP3,TERMINATOR;SVTYPE=SVA;SVLEN=192;MEINFO=SVA,1123,1315,-;DIFF=0.12:n1-1122,c1129g,c1146a,c1163a,c1164t,a1193g,t1267c,g1268a,g1310t,n1314-1316;LP=4;RP=1;RA=2;PRIOR=false;SR=5;AF=0.000150105;AC=1	.	.	.	0.000150105	.	.	.
1	20746056	ALU	TSD=AAAAAAAAAGACCTC;ASSESS=5;INTERNAL=HP1BP3,INTRONIC;SVTYPE=ALU;SVLEN=281;MEINFO=AluYc1,0,281,+;DIFF=1:g148a;LP=31;RP=15;RA=1.047;PRIOR=false;SR=15;AF=0.00030021;AC=2	.	.	.	0.00030021	.	.	.
1	20776974	ALU	TSD=AGAAAAATAGACCAGG;ASSESS=5;INTERNAL=HP1BP3,INTRONIC;SVTYPE=ALU;SVLEN=279;MEINFO=AluYc2,2,281,+;DIFF=1:c98a,g148a;LP=12;RP=14;RA=-0.222;PRIOR=false;SR=9;AF=0.000150105;AC=1	.	.	.	0.000150105	.	.	.
1	20779711	ALU	TSD=null;ASSESS=3;INTERNAL=NM_016287,INTRONIC;SVTYPE=ALU;SVLEN=252;MEINFO=AluY,28,280,+;DIFF=0.87:g49a,c53a,g58a,g199t,c236t,g269a;LP=9;RP=28;RA=-1.637;PRIOR=false;SR=4;AF=0.00347222;AC=4	.	.	.	.	.	0.00347222	.
1	20788216	ALU	TSD=null;ASSESS=4;INTERNAL=NM_016287,PROMOTER;SVTYPE=ALU;SVLEN=280;MEINFO=AluYa5,1,281,+;DIFF=1:t89c,c96a,g145a,c174t,g237c;LP=22;RP=4;RA=2.459;PRIOR=false;SR=8;AF=0.000199681;AC=1	0.000199681	.	.	.	.	.	.
1	20804396	ALU	TSD=GAGAGGGTAATAATCTT;ASSESS=5;INTERNAL=NM_003760,TERMINATOR;SVTYPE=ALU;SVLEN=264;MEINFO=AluYa4_5,17,281,-;DIFF=1:t89c,c96a,g145a,c174t,c236t;LP=21;RP=57;RA=-1.441;PRIOR=false;SR=34;AF=0.00143266;AC=2	0.000998403	0.00143266	.	0.00090063	.	.	.
1	20822588	ALU	TSD=null;ASSESS=3;INTERNAL=NM_001198801,INTRONIC;SVTYPE=ALU;SVLEN=279;MEINFO=AluY,1,280,-;DIFF=0.94:g9a,g11a,c20t,g25a,c48t,g54a,g58a,c64t,g79a,c98t,c109t,g139a,c142t,c150t,c154t,g199t,g207a,c213t,c260t,c276t,g277a;LP=43;RP=47;RA=-0.128;PRIOR=false;SR=16;AF=0.0147569;AC=17	.	.	.	.	.	0.0147569	.
1	20829428	LINE1	TSD=null;ASSESS=4;INTERNAL=EIF4G3,INTRONIC;SVTYPE=LINE1;SVLEN=702;MEINFO=L1Ambig,5317,6019,+;DIFF=0.03:n1-5181,n5258-6019;LP=3;RP=4;RA=-0.415;ISTP=-1;PRIOR=false;SR=2;AF=4.15153e-05;AC=4	.	.	.	.	.	.	4.15153e-05
1	20830866	SVA	TSD=AAGAAGCTTATTTTTTTTT;ASSESS=5;INTERNAL=NM_001198801,INTRONIC;SVTYPE=SVA;SVLEN=884;MEINFO=SVA,432,1316,-;DIFF=0.38:n1-421,n424-426,n429-430,c450t,c452t,c453g,g456a,a487c,g488t,a513g,a561c,t564c,t565a,t580c,t582c,g596a,i609c,g615a,n631,n638,n653-1001,g1009t,a1053g,g1067a,a1079g,c1129g,c1146a,c1163a,c1164t,t1267c,g1268a,g1310t;LP=64;RP=73;RA=-0.19;PRIOR=false;SR=49;AF=0.00286533;AC=4;GENE=EIF4G3	0.00159744	0.00286533	.	0.00195137	.	.	.
1	20835421	ALU	TSD=AAAAAATGAAAGA;ASSESS=5;INTERNAL=NM_001198801,INTRONIC;SVTYPE=ALU;SVLEN=262;MEINFO=AluYb8,19,281,+;DIFF=1:c57t,c64t,c98a,t144c,a161g,g211a,c236t,i252gcagtcc,c248g,a252g;LP=14;RP=20;RA=-0.515;PRIOR=false;SR=14;AF=0.000199681;AC=1	0.000199681	.	.	.	.	.	.
1	20839909	ALU	TSD=null;ASSESS=3;INTERNAL=EIF4G3,INTRONIC;SVTYPE=ALU;SVLEN=268;MEINFO=AluY,12,280,+;DIFF=0.07:c20t,c48t,g52c,c53t,a71g,g99a,g139a,c150t,g152t,g153a,c174t,g207a,c240t,t256c,g257a,c260t,c268t;LP=2;RP=4;RA=-1;PRIOR=false;SR=1;AF=0.000150105;AC=1	.	.	.	0.000150105	.	.	.
1	20854079	ALU	TSD=AAAGAAAAAAAGGTTGA;ASSESS=5;INTERNAL=NM_001198801,INTRONIC;SVTYPE=ALU;SVLEN=281;MEINFO=AluYa5,0,281,+;DIFF=1:t89c,c96a,g145a,c174t,g237c;LP=13;RP=18;RA=-0.469;PRIOR=false;SR=6;AF=0.000199681;AC=1	0.000199681	.	.	.	.	.	.
1	20868106	ALU	TSD=TTTTTTTTTTTTTTTT;ASSESS=5;INTERNAL=EIF4G3,INTRONIC;SVTYPE=ALU;SVLEN=279;MEINFO=AluSc,1,280,-;DIFF=0.95:g49a,c53t,g54a,g58c,d65-66,g74a,g75t,t78a,i129a,c143t,c153t,g156a,c157t,g186a,c197t,g208a,g215a,g232a,c237t,g278a;LP=6;RP=2;RA=1.585;PRIOR=false;SR=9;AF=0.411438;AC=2741	.	.	.	0.411438	.	.	.
1	20880060	ALU	TSD=null;ASSESS=4;INTERNAL=NM_001198801,INTRONIC;SVTYPE=ALU;SVLEN=278;MEINFO=AluY,2,280,-;DIFF=0.99:c8t,g49a,c98t,c154t,g162a,g199t,c218g,c230t,g261a,c268t,g269a,c276t;LP=26;RP=19;RA=0.453;PRIOR=false;SR=4;AF=0.0138889;AC=16	.	.	.	.	.	0.0138889	.
1	20904125	ALU	TSD=TCGCATGGCTTATTTT;ASSESS=5;INTERNAL=EIF4G3,INTRONIC;SVTYPE=ALU;SVLEN=170;MEINFO=AluYe4,111,281,-;DIFF=0.84:g9a,c10t,g11a,c20t,c57t,g67a,c78g,g91a,a94g,c98g,g100a,g110a,i127aa,t144a,i204c,g207a,a210g,t219c,c236t,d265;LP=12;RP=12;RA=0;PRIOR=false;SR=9;AF=0.000150105;AC=1	.	.	.	0.000150105	.	.	.
1	20910714	ALU	TSD=CACAGCACAGATTTTT;ASSESS=5;INTERNAL=EIF4G3,INTRONIC;SVTYPE=ALU;SVLEN=279;MEINFO=AluYb8,2,281,-;DIFF=1:c57t,c64t,c98a,t144c,g211a,c236t,c248g,i252gcagtcc,a252g;LP=31;RP=42;RA=-0.438;PRIOR=false;SR=42;AF=0.00030021;AC=2	.	.	.	0.00030021	.	.	.
1	20918726	ALU	TSD=TTTTTTTTTTTTTTTTTTTTTTTTT;ASSESS=5;INTERNAL=NM_001198801,INTRONIC;SVTYPE=ALU;SVLEN=279;MEINFO=AluY,1,280,+;DIFF=0.99:g11a,c48t,i65gt,c174t,c218g,g237a,c238t,c260t,c275t,c276t;LP=43;RP=73;RA=-0.764;PRIOR=false;SR=12;AF=0.0104167;AC=12	.	.	.	.	.	0.0104167	.
1	20920284	LINE1	TSD=TTAAATCA;ASSESS=5;INTERNAL=EIF4G3,INTRONIC;SVTYPE=LINE1;SVLEN=777;MEINFO=L1Ambig,5241,6018,-;DIFF=0.08:n1-5240,n5709-6019;LP=12;RP=14;RA=-0.222;ISTP=0;PRIOR=false;SR=16;AF=0.000150105;AC=1	.	.	.	0.000150105	.	.	.
1	20980188	ALU	TSD=AAAAAAAAAAAA;ASSESS=5;INTERNAL=NM_001198803,INTRONIC;SVTYPE=ALU;SVLEN=279;MEINFO=AluY,1,280,+;DIFF=0.98:c4t,g41a,g54a,c57t,c78t,c98t,g99a,g196c,g199t,c218g,c230t,g237a,g239a,c268t;LP=62;RP=90;RA=-0.538;PRIOR=false;SR=12;AF=0.00434028;AC=5	.	.	.	.	.	0.00434028	.
1	20995840	LINE1	TSD=GAAAATAAACCAAGGTTTG;ASSESS=5;INTERNAL=NM_001198803,INTRONIC;SVTYPE=LINE1;SVLEN=707;MEINFO=L1Ta,5312,6019,+;DIFF=0.11:n1-5312,c5391t,n5424,t5535g,g5538c,c5564a,c5765a,i5879g,c5945t;LP=9;RP=19;RA=-1.078;ISTP=0;PRIOR=false;SR=19;AF=0.000716332;AC=1;GENE=EIF4G3	0.000798722	0.000716332	.	0.000450315	.	.	.
1	21007537	ALU	TSD=AAAAAAAAAAAAAAAAAAAAAA;ASSESS=5;INTERNAL=NM_001198803,INTRONIC;SVTYPE=ALU;SVLEN=269;MEINFO=AluY,11,280,+;DIFF=0.9:c20t,c22a,c48t,g54a,c57t,g58a,i65gt,c96t,c98t,g99a,c109t,c150t,c154t,c174t,g199t,g207a,g214a,t219a,c230t,g231a,g237a,c238a,c260t,g265a;LP=49;RP=16;RA=1.615;PRIOR=false;SR=69;AF=0.217926;AC=248	0.439497	.	0.468975	0.404383	.	0.217926	.
1	21043945	ALU	TSD=AGAAAAACATTTGGTC;ASSESS=5;INTERNAL=EIF4G3,INTRONIC;SVTYPE=ALU;SVLEN=143;MEINFO=AluYa3_4,138,281,+;DIFF=0.77:g5a,g46a,g49a,c53t,g54a,c57t,a60c,a76t,g81a,t86g,t93c,c98t,g99c,c106t,c107g,c109a,g145a,c174t,g237c;LP=7;RP=17;RA=-1.28;PRIOR=false;SR=13;AF=0.00030021;AC=2	.	.	.	0.00030021	.	.	.
1	21055971	ALU	TSD=ATAAAATTAGTATCC;ASSESS=5;INTERNAL=NM_001198803,INTRONIC;SVTYPE=ALU;SVLEN=281;MEINFO=AluYa5,0,281,+;DIFF=1:t89c,c96a,i127aa,g145a,c174t,g237c;LP=9;RP=11;RA=-0.29;PRIOR=false;SR=15;AF=0.000199681;AC=1	0.000199681	.	.	.	.	.	.
1	21118931	ALU	TSD=null;ASSESS=3;INTERNAL=NM_001198803,INTRONIC;SVTYPE=ALU;SVLEN=279;MEINFO=AluY,1,280,-;DIFF=0.92:g5a,g9a,c48t,c57a,i65gt,t86g,g99a,g139a,g143a,c150t,g153a,c154t,g162a,c174t,g196c,g197a,g199t,g214a,g237a,g239a,g261a,g269a,c276t;LP=28;RP=35;RA=-0.322;PRIOR=false;SR=9;AF=0.00520833;AC=6	.	.	.	0.00225158	.	0.00520833	.
1	21129513	ALU	TSD=AAGAAAGACTGGCTTC;ASSESS=5;INTERNAL=NM_001198803,INTRONIC;SVTYPE=ALU;SVLEN=271;MEINFO=AluYc1,10,281,+;DIFF=1:g148a;LP=100;RP=101;RA=-0.014;PRIOR=false;SR=70;AF=0.00573066;AC=8;GENE=EIF4G3	0.0081869	0.00573066	.	0.019964	.	0.000868056	.
1	21145447	ALU	TSD=TCCAGTTTATTTTATGCCTTTTTTTTTTTT;ASSESS=5;INTERNAL=NM_001198803,INTRONIC;SVTYPE=ALU;SVLEN=280;MEINFO=AluYb8,1,281,-;DIFF=1:c57t,c64t,c98a,t144c,g211a,c236t,i252gcagtcc,c248g,a252g;LP=40;RP=25;RA=0.678;PRIOR=false;SR=22;AF=0.000399361;AC=2	0.000399361	.	.	.	.	.	.
1	21166107	ALU	TSD=GACTATAGTCTT;ASSESS=5;INTERNAL=NM_001198803,INTRONIC;SVTYPE=ALU;SVLEN=280;MEINFO=AluYa5,1,281,-;DIFF=1:t89c,c96a,g145a,c174t,g237c;LP=2961;RP=2298;RA=0.366;PRIOR=false;SR=2353;AF=0.255014;AC=356;GENE=EIF4G3	0.255391	0.255014	0.283723	0.221705	0.261905	0.25434	.
1	21172138	ALU	TSD=AAAAAAAAAAAAAAAAAAAA;ASSESS=5;INTERNAL=NM_001198803,INTRONIC;SVTYPE=ALU;SVLEN=279;MEINFO=AluY,1,280,-;DIFF=1:c8t,c10t,g54a,c57t,c78t,c98t,g139a,g214a,c268a;LP=16;RP=17;RA=-0.087;PRIOR=false;SR=12;AF=0.00868056;AC=10	.	.	.	.	.	0.00868056	.
1	21364231	ALU	TSD=dATATATATATATATATATATATATATA;ASSESS=5;INTERNAL=null,null;SVTYPE=ALU;SVLEN=279;MEINFO=AluY,1,280,-;DIFF=0.98:g9a,c20t,c53t,c57t,a76t,c98t,c138t,g143a,g155a,g196c,g199t,c206t,c230t;LP=77;RP=119;RA=-0.628;PRIOR=false;SR=67;AF=0.0372493;AC=52	.	0.0372493	.	0.0970217	.	.	.
1	21387065	ALU	TSD=null;ASSESS=3;INTERNAL=NBPF3,PROMOTER;SVTYPE=ALU;SVLEN=279;MEINFO=AluY,1,280,+;DIFF=0.43:c4t,g11a,a71g,g79a,c88t,c98t,c109t,c206t,c229t,c238t,c260t,c268t,d281;LP=172;RP=1031;RA=-2.584;PRIOR=false;SR=3;AF=0.00075188;AC=5	.	.	.	0.00075188	.	.	.
1	21390985	ALU	TSD=null;ASSESS=3;INTERNAL=null,null;SVTYPE=ALU;SVLEN=203;MEINFO=AluY,78,281,+;DIFF=0.98:g5a,c8t,c48t,g54a,i65gt,a76t,t86g,c98t,c268t;LP=19;RP=38;RA=-1;PRIOR=false;SR=3;AF=0.000868056;AC=1	.	.	.	.	.	0.000868056	.
1	21395475	ALU	TSD=AAAAATAATAAGTGCT;ASSESS=5;INTERNAL=null,null;SVTYPE=ALU;SVLEN=279;MEINFO=AluY,1,280,-;DIFF=0.89:g11a,c48t,g54a,c57t,i65gt,t86g,t93c,c98t,g139a,g151a,c206t,g208c,a210g,c213t,g214a,c230t,g237a;LP=97;RP=126;RA=-0.377;PRIOR=false;SR=13;AF=0.000199681;AC=1	0.000199681	.	.	.	.	.	.
1	21401242	ALU	TSD=ATGTTTTCTT;ASSESS=5;INTERNAL=NBPF3,PROMOTER;SVTYPE=ALU;SVLEN=193;MEINFO=AluYb6_2,88,281,-;DIFF=1:c57t,c64t,c98a,t144c,g211a,c236t,a252g;LP=16;RP=20;RA=-0.322;PRIOR=false;SR=14;AF=0.000150105;AC=1	.	.	.	0.000150105	.	.	.
1	21424748	ALU	TSD=AAAAGGCACTTCT;ASSESS=5;INTERNAL=null,null;SVTYPE=ALU;SVLEN=279;MEINFO=AluYb8,2,281,-;DIFF=1:c57t,c64t,g72a,c98a,t144c,g211a,c236t,i252gcagtcc,c248g,a252g;LP=756;RP=1960;RA=-1.374;PRIOR=false;SR=1126;AF=0.106734;AC=149	0.125599	0.106734	0.0840827	0.0259682	.	.	0.0549713
1	21432219	ALU	TSD=null;ASSESS=3;INTERNAL=NBPF3,PROMOTER;SVTYPE=ALU;SVLEN=279;MEINFO=AluY,1,280,-;DIFF=0.99:c4t,g9a,c20t,c53t,g54a,c98t,g110a,g139a,c142t,g162a,c174t,g196t,g199t,c206t,g214a,c230t;LP=28;RP=32;RA=-0.193;PRIOR=false;SR=19;AF=0.002852;AC=19	.	.	.	0.002852	.	.	.
1	21432236	ALU	TSD=AAAAAAAAAAAAAAAAA;ASSESS=5;INTERNAL=NR_046176,PROMOTER;SVTYPE=ALU;SVLEN=269;MEINFO=AluSz,11,280,-;DIFF=0.9:d64-65,c111t,i129a,c139t,c153g,c155t,a163g,c197t,c269a;LP=46;RP=38;RA=0.276;PRIOR=false;SR=47;AF=0.0269097;AC=31	.	.	.	.	.	0.0269097	.
1	21438703	SVA	TSD=TATTTTCAGCATTTTA;ASSESS=5;INTERNAL=NBPF3,PROMOTER;SVTYPE=SVA;SVLEN=157;MEINFO=SVA,1158,1315,-;DIFF=0.12:n1-1157,c1163a,c1164t,t1267c,g1268a,g1310t;LP=4;RP=1;RA=2;PRIOR=false;SR=4;AF=0.000150105;AC=1	.	.	.	0.000150105	.	.	.
1	21471410	ALU	TSD=CCTGTGAACCATTTTTT;ASSESS=5;INTERNAL=NBPF3,INTRONIC;SVTYPE=ALU;SVLEN=279;MEINFO=AluYb3a1,2,281,-;DIFF=1:c57t,c64t,c98a,g211a,c236t,c248g,a252g;LP=9;RP=19;RA=-1.078;PRIOR=false;SR=9;AF=0.000150105;AC=1	.	.	.	0.000150105	.	.	.
1	21474514	SVA	TSD=AGAATTTATCTATCAGTC;ASSESS=5;INTERNAL=NBPF3,INTRONIC;SVTYPE=SVA;SVLEN=1267;MEINFO=SVA,48,1315,+;DIFF=0.25:n1-926,a931g,a934t,g938a,c945a,g1009t,c1019t,a1041g,a1053g,g1067a,a1068g,a1079g,a1102g,a1116g,c1129g,a1132g,c1157t,a1178g,g1268a,t1292c;LP=1;RP=30;RA=-4.907;PRIOR=false;SR=14;AF=0.00060042;AC=4	.	.	.	0.00060042	.	.	.
1	21477619	SVA	TSD=null;ASSESS=3;INTERNAL=NR_046176,INTRONIC;SVTYPE=SVA;SVLEN=1240;MEINFO=SVA,75,1315,+;DIFF=0.29:n1-1083,c1129g,c1157t,g1268a;LP=7;RP=12;RA=-0.778;PRIOR=false;SR=4;GENE=NBPF3;AF=0.000199681;AC=1	0.000199681	.	.	.	.	.	.
1	21499765	SVA	TSD=null;ASSESS=3;INTERNAL=NM_000478,PROMOTER;SVTYPE=SVA;SVLEN=1240;MEINFO=SVA,75,1315,+;DIFF=0.32:n1-74,a78c,c158t,a167g,g192c,t193c,t202g,n211,n213,a218g,t221a,g225a,a231g,c232t,t236c,g250a,c253t,g254a,t258a,t269c,g271t,g274t,g278a,n285-614,c618t,g627a,n653,a668g,g681a,n725,t729c,t731c,g734a,g764c,a773g,g840c,t847g,t862c,g880c,g938a,c945a,t970c,t985c,n995-1316;LP=25;RP=27;RA=-0.111;PRIOR=false;…	.	0.00143266	.	0.00105074	.	.	.
1	21499765	ALU	TSD=null;ASSESS=3;INTERNAL=ALPL,PROMOTER;SVTYPE=ALU;SVLEN=268;MEINFO=AluY,12,280,+;DIFF=0.53:g49a,g52a,g54a,g65a,c78g,g91a,c213t,c218g,c222t,g237a;LP=9;RP=1;RA=3.17;PRIOR=false;SR=7;AF=0.000450315;AC=3	.	.	.	0.000450315	.	.	.
1	21499781	SVA	TSD=AAAGAAATATACTTCT;ASSESS=5;INTERNAL=NM_000478,PROMOTER;SVTYPE=SVA;SVLEN=1240;MEINFO=SVA,75,1315,+;DIFF=0.4:n1-74,a78c,c158t,a167g,g192c,t193c,t202g,g225a,a231g,g250a,c253t,t258a,g271t,n297,n310-614,c618t,n623,g627a,n632,n641,n645,n653,n657,a668g,g681a,t729c,t731c,g734a,g764c,a773g,g840c,t847g,t862c,g880c,g938a,c945a,t970c,t985c,n995-1316;LP=62;RP=114;RA=-0.879;PRIOR=false;SR=62;AF=0.00159744;A…	0.00159744	.	.	.	.	.	.
1	21513745	ALU	TSD=TTGCTGGTGTTTTT;ASSESS=5;INTERNAL=NM_000478,INTRONIC;SVTYPE=ALU;SVLEN=280;MEINFO=AluYb3a1,1,281,-;DIFF=1:c57t,c64t,t144c,c236t,i252gcagtcc,c248g,a252g;LP=19;RP=15;RA=0.341;PRIOR=false;SR=13;AF=0.000199681;AC=1	0.000199681	.	.	0.000750525	.	.	.
1	21554790	ALU	TSD=dGTCTGTCTGTCTGTCTGTCTGTCTG;ASSESS=5;INTERNAL=ALPL,INTRONIC;SVTYPE=ALU;SVLEN=279;MEINFO=AluSz,1,280,+;DIFF=0.93:g5a,g54a,c57t,t65g,g81a,g101a,g112a,a118g,i129a,g140a,g141c,g144a,c151t,c153t,c155t,g156a,c158t,a163g,c197t,g213a,c214t,g219c,c231t,c237t,c277t;LP=407;RP=490;RA=-0.268;PRIOR=false;SR=1404;AF=0.0315221;AC=210	.	.	0.0188849	0.0315221	.	.	.
1	21675511	ALU	TSD=AAAGAAAAATACA;ASSESS=5;INTERNAL=USP48,TERMINATOR;SVTYPE=ALU;SVLEN=236;MEINFO=AluYb8,45,281,+;DIFF=1:c57t,c64t,c98a,t144c,g211a,c236t,i252gcagtcc,c248g,a252g;LP=11;RP=7;RA=0.652;PRIOR=false;SR=12;AF=0.000150105;AC=1	.	.	.	0.000150105	.	.	.
1	21686850	ALU	TSD=CATGTTATCTTCTTTTT;ASSESS=5;INTERNAL=NM_032236,INTRONIC;SVTYPE=ALU;SVLEN=280;MEINFO=AluYa5,1,281,-;DIFF=1:t89c,c96a,i127aa,g145a,c174t,g237c,c248g;LP=14;RP=13;RA=0.107;PRIOR=false;SR=7;AF=0.000199681;AC=1	0.000199681	.	.	.	.	.	.
1	21709781	ALU	TSD=GGGATGAGTGTTTTTC;ASSESS=5;INTERNAL=USP48,INTRONIC;SVTYPE=ALU;SVLEN=281;MEINFO=AluYb8,0,281,-;DIFF=1:c57t,c64t,c98a,t144c,g211a,c236t,i252gcagtcc,c248g,a252g;LP=9;RP=14;RA=-0.637;PRIOR=false;SR=6;AF=0.000150105;AC=1	.	.	.	0.000150105	.	.	.
1	21714104	SVA	TSD=AAGAATGAGACATCAT;ASSESS=5;INTERNAL=USP48,INTRONIC;SVTYPE=SVA;SVLEN=1267;MEINFO=SVA,48,1315,+;DIFF=0.29:n1-976,g1009t,c1019t,a1053g,g1067a,a1079g,c1129g,c1157t,t1292c;LP=17;RP=11;RA=0.628;PRIOR=false;SR=8;AF=0.000150105;AC=1	.	.	.	0.000150105	.	.	.
1	21714926	LINE1	TSD=null;ASSESS=3;INTERNAL=NM_032236,INTRONIC;SVTYPE=LINE1;SVLEN=6011;MEINFO=L1Ta,7,6018,+;DIFF=0.12:n1-5563,n5867-5869,n5873;LP=47;RP=22;RA=1.095;ISTP=0;PRIOR=false;SR=21;AF=0.00143266;AC=2;GENE=USP48	.	0.00143266	.	.	.	.	.
1	21714946	LINE1	TSD=TAAAAATTAGCTGGGTGTGA;ASSESS=5;INTERNAL=NM_032236,INTRONIC;SVTYPE=LINE1;SVLEN=6011;MEINFO=L1Ambig,7,6018,+;DIFF=0.11:n1-6,g67t,i72g,c72g,t78c,g165t,g213c,t231c,t254a,g352a,t376g,n391,n450,n472,n504-6019;LP=69;RP=37;RA=0.899;ISTP=0;PRIOR=false;SR=25;GENE=USP48;AF=0.000599042;AC=3	0.000599042	.	.	0.002852	.	.	.
1	21741232	ALU	TSD=AAAAAAGAAACCA;ASSESS=5;INTERNAL=NM_001032730,INTRONIC;SVTYPE=ALU;SVLEN=281;MEINFO=AluYa4_5,0,281,+;DIFF=1:t89c,c96a,i119aaaaaa,g145a,c174t,c236t;LP=11;RP=31;RA=-1.495;PRIOR=false;SR=13;AF=0.000716332;AC=1;GENE=USP48	.	0.000716332	.	.	.	.	.
1	21741676	ALU	TSD=AAAAAAGGTAGAACTA;ASSESS=5;INTERNAL=NM_001032730,INTRONIC;SVTYPE=ALU;SVLEN=281;MEINFO=AluYa4_4,0,281,+;DIFF=1:c96a,g145a,c174t,g237c;LP=39;RP=26;RA=0.585;PRIOR=false;SR=14;AF=0.000199681;AC=1	0.000199681	.	.	.	.	.	.
1	21742993	LINE1	TSD=AAAAACTGGGTGTTTTT;ASSESS=5;INTERNAL=NM_001032730,INTRONIC;SVTYPE=LINE1;SVLEN=456;MEINFO=L1Ta,5563,6019,+;DIFF=0.07:n1-5563,n5879,n5886,n5939,n5945,g5957t;LP=13;RP=5;RA=1.379;ISTP=0;PRIOR=false;SR=11;AF=0.000868056;AC=1	.	.	.	.	.	0.000868056	.
1	21756491	LINE1	TSD=AAAAAAAAAAAAAAAAA;ASSESS=5;INTERNAL=USP48,INTRONIC;SVTYPE=LINE1;SVLEN=5392;MEINFO=L1Ambig,626,6018,+;DIFF=0.08:n1-4330,g4359c,n4407-4526,t4557c,g4558a,n4662-4808,n4860-4996,a5006c,n5073-5194,n5262-6019;LP=4;RP=16;RA=-2;ISTP=0;PRIOR=false;SR=4;AF=0.000161183;AC=16	.	.	.	.	.	.	0.000161183
1	21756762	ALU	TSD=null;ASSESS=3;INTERNAL=USP48,INTRONIC;SVTYPE=ALU;SVLEN=273;MEINFO=AluY,7,280,+;DIFF=0.88:g72a,t93c,c98t,c150t,g214a,g237a,g261a,c268t;LP=12;RP=69;RA=-2.524;PRIOR=false;SR=11;AF=2.01471e-05;AC=2	.	.	.	.	.	.	2.01471e-05
1	21778622	ALU	TSD=AAAAAAAAAAAAAAAAAAAAA;ASSESS=5;INTERNAL=NM_001032730,INTRONIC;SVTYPE=ALU;SVLEN=279;MEINFO=AluY,1,280,+;DIFF=0.93:g6a,c10t,g11t,c18t,c20t,c48t,g52a,c53t,g54a,g56c,g58a,a76t,t86g,t93c,c96a,c98t,g146a,g151t,g199a,g208t,g212a,c213a,g214a,g226a,c250a,c260t;LP=82;RP=104;RA=-0.343;PRIOR=false;SR=23;AF=0.00139776;AC=7	0.00139776	.	.	0.00120084	.	.	.
1	21805712	ALU	TSD=null;ASSESS=4;INTERNAL=NM_001013693,PROMOTER;SVTYPE=ALU;SVLEN=279;MEINFO=AluSg,1,280,-;DIFF=0.9:g58a,d65-66,i129a,g140a,g144a,a163g,g198a,c214t,g229a,g238a,c239t,g240a,c252t,g262a,d264-282;LP=59;RP=68;RA=-0.205;PRIOR=false;SR=11;AF=0.00173611;AC=2	.	.	.	.	.	0.00173611	.
1	21827395	ALU	TSD=CTCCAAGTCTATACTCTT;ASSESS=5;INTERNAL=NM_001291860,INTRONIC;SVTYPE=ALU;SVLEN=280;MEINFO=AluYa5a2,1,281,-;DIFF=1:c57a,g72a,t89c,c96a,g145a,c174t,g237c,i133a;LP=11;RP=9;RA=0.29;PRIOR=false;SR=17;AF=0.000716332;AC=1;GENE=HSPG2	0.000199681	0.000716332	.	.	.	.	.
1	21855098	LINE1	TSD=null;ASSESS=1;INTERNAL=HSPG2,INTRONIC;SVTYPE=LINE1;SVLEN=6014;MEINFO=L1Ambig,4,6018,-;DIFF=0.07:n1-5040,c5093a,c5109t,n5114-5119,g5132a,t5154a,a5182g,c5193a,g5208a,n5261-5367,c5391t,n5426-5511,g5522t,c5529a,t5535g,g5538c,n5551,n5588-6019;LP=16;RP=9;RA=0.83;ISTP=-1;PRIOR=false;SR=0;AF=1.0092e-05;AC=1	.	.	.	.	.	.	1.0092e-05
1	21900901	SVA	TSD=AAAAAAAAAAGTTTATAGC;ASSESS=5;INTERNAL=NM_001291860,INTRONIC;SVTYPE=SVA;SVLEN=1316;MEINFO=SVA,0,1316,+;DIFF=0.21:n1-970,n982,t985a,g1009t,n1017,a1053g,g1067a,a1079g,c1129g,c1146a,c1163a,c1164t,t1267c,g1268a,g1310t;LP=1;RP=8;RA=-3;PRIOR=false;SR=6;AF=0.000868056;AC=1	0.000199681	.	.	0.00120084	.	0.000868056	.
1	22010947	ALU	TSD=CTCTCTCTT;ASSESS=5;INTERNAL=NM_005747,INTRONIC;SVTYPE=ALU;SVLEN=279;MEINFO=AluYa1_1,1,280,+;DIFF=0.93:g145a,g196t,g237a;LP=38;RP=43;RA=-0.178;PRIOR=false;SR=6;AF=0.00019976;AC=1	0.00019976	.	.	.	.	.	.
1	22055886	ALU	TSD=TTTTTTTTTTTTTTTTTTT;ASSESS=5;INTERNAL=NM_001039802,INTRONIC;SVTYPE=ALU;SVLEN=279;MEINFO=AluY,1,280,-;DIFF=0.96:g49a,c57t,g79a,c98t,g110a,c172t,g196c,g199t,c206t,c218g,c236t,c238t,c243t;LP=56;RP=135;RA=-1.269;PRIOR=false;SR=54;AF=0.0166333;AC=83	0.0166333	.	.	.	.	.	.
1	22062754	ALU	TSD=null;ASSESS=4;INTERNAL=NM_001039802,INTRONIC;SVTYPE=ALU;SVLEN=279;MEINFO=AluSz,1,280,-;DIFF=0.58:c4a,g11a,g15a,c53t,c57a,d65,c153g,g215a,g229a,c261t,g268a,d275-282;LP=2;RP=8;RA=-2;PRIOR=false;SR=2;GENE=CDC42;AF=0.031746;AC=4	.	.	.	.	0.031746	.	.
1	22062756	ALU	TSD=null;ASSESS=4;INTERNAL=CDC42,INTRONIC;SVTYPE=ALU;SVLEN=279;MEINFO=AluY,1,280,+;DIFF=0.98:g5a,g9a,g49a,c53t,g54a,g58a,g67a,c98t,g151a,g231a,c260t,g269a,g271a;LP=8;RP=12;RA=-0.585;PRIOR=false;SR=5;AF=0.00060042;AC=4	.	.	.	0.00060042	.	.	.
1	22062758	ALU	TSD=AAAAAAAAAAAAAAAAAAAAAAAAAAAA;ASSESS=5;INTERNAL=NM_001039802,INTRONIC;SVTYPE=ALU;SVLEN=279;MEINFO=AluSx,1,280,+;DIFF=0.99:c48t,c53t,c57t,t65c,t66a,g67a,i129a,c153g,c175t,c197g,g219c,g262a;LP=35;RP=46;RA=-0.394;PRIOR=false;SR=13;AF=0.0338542;AC=39	.	.	.	.	.	0.0338542	.
1	22078672	ALU	TSD=null;ASSESS=1;INTERNAL=CDC42,INTRONIC;SVTYPE=ALU;SVLEN=279;MEINFO=AluY,1,280,+;DIFF=0.99:g5a,c8t,c57t,c64t,a76t,c98a,g110a,c138t,g143a,c154t,g237a;LP=47;RP=8;RA=2.555;PRIOR=false;SR=0;AF=1.00737e-05;AC=1	.	.	.	.	.	.	1.00737e-05
1	22087906	ALU	TSD=CTAGTGCATAATTTA;ASSESS=5;INTERNAL=NM_001039802,INTRONIC;SVTYPE=ALU;SVLEN=278;MEINFO=AluYh,3,281,-;DIFF=0.85:c48a,c64t,g99a,t111c,g237c;LP=2;RP=9;RA=-2.17;PRIOR=false;SR=9;AF=0.000868056;AC=1	.	.	.	0.00030021	.	0.000868056	.
1	22091813	LINE1	TSD=TTTTTTTTTTTTTTTTTTTT;ASSESS=5;INTERNAL=CDC42,3_UTR;SVTYPE=LINE1;SVLEN=509;MEINFO=L1Ambig,5509,6018,+;DIFF=0.02:n1-5508,t5535g,g5538t,g5549t,g5552a,a5555g,c5568t,a5569g,g5577a,g5586a,g5607a,c5709a,a5712g,n5729-6019;LP=2;RP=1;RA=1;ISTP=0;PRIOR=false;SR=6;GENE=CDC42;AF=0.106115;AC=236	.	.	0.106115	.	.	.	.
1	22098607	ALU	TSD=CCATTTAAATTTTT;ASSESS=5;INTERNAL=NM_001039802,TERMINATOR;SVTYPE=ALU;SVLEN=280;MEINFO=AluYb8,1,281,-;DIFF=1:c57t,c64t,c98a,t144c,g211a,c230t,c236t,i252gcagtcc,c248g,a252g;LP=25;RP=22;RA=0.184;PRIOR=false;SR=25;AF=0.00143266;AC=2	.	0.00143266	.	.	.	.	.
1	22177198	ALU	TSD=GATGGACTTGACTTTCT;ASSESS=5;INTERNAL=null,null;SVTYPE=ALU;SVLEN=281;MEINFO=AluYb3a1,0,281,-;DIFF=1:c57t,c64t,t144c,c236t,i252gcagtcc,c248g,a252g;LP=13;RP=13;RA=0;PRIOR=false;SR=10;AF=0.000199681;AC=1	0.000199681	.	.	.	.	.	.
1	22215294	ALU	TSD=AAAAAAAAAAAAAAAAAAAAAAAAAAAA;ASSESS=5;INTERNAL=null,null;SVTYPE=ALU;SVLEN=279;MEINFO=AluSg,1,280,+;DIFF=0.95:g9a,g11a,c20t,d65-66,c95t,g104a,i129a,c153g,g154a,c155t,g215a,c231a,c237t,g240a,c247a,g260a,c261t,g262a,c269t,g270a,t275c,d280-282;LP=49;RP=64;RA=-0.385;PRIOR=false;SR=28;AF=0.0112847;AC=13	.	.	.	0.0121585	.	0.0112847	.
1	22227534	ALU	TSD=null;ASSESS=3;INTERNAL=null,null;SVTYPE=ALU;SVLEN=279;MEINFO=AluSg,1,280,-;DIFF=1:g9a,d65-66,i129a,c139t,c151t,g154a,g156a,c197t,g219c,c237t,c239t,c277t;LP=13;RP=14;RA=-0.107;PRIOR=false;SR=1;AF=0.000716332;AC=1	.	0.000716332	.	.	.	.	.
1	22301674	ALU	TSD=AAGAAAAAACA;ASSESS=5;INTERNAL=null,null;SVTYPE=ALU;SVLEN=281;MEINFO=AluYb8,0,281,+;DIFF=1:c57t,c64t,c98a,t144c,g211a,c236t,i252gcagtcc,c248g,a252g;LP=12;RP=13;RA=-0.115;PRIOR=false;SR=6;AF=0.000199681;AC=1	0.000199681	.	.	.	.	.	.
1	22311382	ALU	TSD=A;ASSESS=5;INTERNAL=null,null;SVTYPE=ALU;SVLEN=279;MEINFO=AluY,1,280,+;DIFF=0.69:g9a,g54a,c57t,a76t,g79a,t86g,t93c,c98t,g99a,g110a,c138t,g143a,g151a,g152t,c154t,c198t,g207a,g212a,c218t,g231a,g239a;LP=42;RP=67;RA=-0.674;PRIOR=false;SR=4;AF=0.000199681;AC=1	0.000199681	.	.	.	.	.	.
1	22407534	ALU	TSD=AGAAAATCAGAGGCA;ASSESS=5;INTERNAL=null,null;SVTYPE=ALU;SVLEN=281;MEINFO=AluYa4_4,0,281,+;DIFF=1:c96a,g145a,c174t,g186a,g237c;LP=10;RP=36;RA=-1.848;PRIOR=false;SR=8;AF=0.000199681;AC=1	0.000199681	.	.	.	.	.	.
1	22446223	ALU	TSD=null;ASSESS=3;INTERNAL=NM_001083621,PROMOTER;SVTYPE=ALU;SVLEN=279;MEINFO=AluSq,1,280,-;DIFF=1:c57t,t65g,c80t,c95t,i129a,g144a,c151t,c153g,g198a,g240a,c244t,g262a,c269t,g272a,g278a;LP=12;RP=5;RA=1.263;PRIOR=false;SR=8;AF=0.0546875;AC=63	.	.	.	0.000450315	.	0.0546875	.
1	22455331	ALU	TSD=GGCAGGCTTTTT;ASSESS=5;INTERNAL=NM_001083621,INTRONIC;SVTYPE=ALU;SVLEN=280;MEINFO=AluYa5,1,281,-;DIFF=1:t89c,c96a,g145a,c174t,g237c;LP=14;RP=17;RA=-0.28;PRIOR=false;SR=23;AF=0.000199681;AC=1	0.000199681	.	.	.	.	.	.
1	22459754	ALU	TSD=GACTTGATGGTATTTTT;ASSESS=5;INTERNAL=NM_001083621,INTRONIC;SVTYPE=ALU;SVLEN=280;MEINFO=AluYa4_5,1,281,-;DIFF=1:t89c,c96a,g145a,c174t,c255t,a262g;LP=28;RP=30;RA=-0.1;PRIOR=false;SR=38;AF=0.00143266;AC=2;GENE=ZBTB40	0.00139776	0.00143266	0.0265288	0.00150105	0.00793651	0.00347222	.
1	22475071	SVA	TSD=null;ASSESS=3;INTERNAL=NM_001083621,INTRONIC;SVTYPE=SVA;SVLEN=451;MEINFO=SVA,864,1315,+;DIFF=0.34:n1-863,g880c,a886g,g898a,c920t,t922g,a931g,a934t,g938a,c945a,a977t,g1009t,c1019t,a1041g,a1053g,g1067a,a1068g,a1079g,a1102g,a1116g,c1129g,a1132g,c1157t,a1178g,g1268a,t1292c;LP=1;RP=17;RA=-4.087;PRIOR=false;SR=11;GENE=ZBTB40;AF=0.000199681;AC=1	0.000199681	.	.	.	.	.	.
1	22486012	SVA	TSD=AAAAAAAAAAAATCCTGG;ASSESS=5;INTERNAL=NM_001083621,INTRONIC;SVTYPE=SVA;SVLEN=441;MEINFO=SVA,874,1315,+;DIFF=0.29:n1-873,g880c,g938a,c945a,t970c,t985c,g1009t,a1053g,g1067a,a1079g,c1129g,c1146a,c1163a,c1164t,t1267c,g1268a,g1310t;LP=1;RP=32;RA=-5;PRIOR=false;SR=12;GENE=ZBTB40;AF=0.000399361;AC=2	0.000399361	.	.	.	.	.	.
1	22496419	ALU	TSD=null;ASSESS=4;INTERNAL=NM_001083621,INTRONIC;SVTYPE=ALU;SVLEN=279;MEINFO=AluSc,1,280,-;DIFF=0.84:g9a,c57t,d64-65,t78a,g88t,i129a,c153g,a163g,c214t,c237t,d249-282;LP=33;RP=50;RA=-0.599;PRIOR=false;SR=5;AF=0.000868056;AC=1	0.000399361	.	.	0.00405284	.	0.000868056	.
1	22503157	ALU	TSD=GAAGAACATTCTT;ASSESS=5;INTERNAL=NM_001083621,INTRONIC;SVTYPE=ALU;SVLEN=280;MEINFO=AluYa5,1,281,-;DIFF=1:t89c,c96a,g145a,c174t,g237c;LP=18;RP=13;RA=0.469;PRIOR=false;SR=17;AF=0.000199681;AC=1	0.000199681	.	.	.	.	.	.
1	22546414	LINE1	TSD=null;ASSESS=1;INTERNAL=EPHA8,PROMOTER;SVTYPE=LINE1;SVLEN=4305;MEINFO=L1Ambig,1713,6018,-;DIFF=0.03:n1-2634,a2652t,a2777g,n2786-6019;LP=3;RP=1;RA=1.585;ISTP=-1;PRIOR=false;SR=0;AF=0.000150105;AC=1	.	.	.	0.000150105	.	.	.
1	22560084	ALU	TSD=CAGCTTGCCTGTTTT;ASSESS=5;INTERNAL=EPHA8,PROMOTER;SVTYPE=ALU;SVLEN=61;MEINFO=AluSz,220,281,-;DIFF=0.2:c237t,g238a,a253g;LP=2;RP=1;RA=1;PRIOR=false;SR=10;AF=0.000150105;AC=1	.	.	.	0.000150105	.	.	.
1	22575426	ALU	TSD=GCCCATTTTCT;ASSESS=5;INTERNAL=NM_020526,INTRONIC;SVTYPE=ALU;SVLEN=277;MEINFO=AluYb6_2,4,281,-;DIFF=1:c57t,c64t,c98a,t144c,g211a,c236t,c248g,a252g;LP=71;RP=73;RA=-0.04;PRIOR=false;SR=71;AF=0.00286533;AC=4;GENE=EPHA8	0.0061901	0.00286533	.	0.00030021	.	.	.
1	22610864	ALU	TSD=AAAAAAAAAAAAAAAAAAAAAAAAAA;ASSESS=5;INTERNAL=EPHA8,TERMINATOR;SVTYPE=ALU;SVLEN=279;MEINFO=AluY,1,280,+;DIFF=0.53:c4t,g9a,g54a,i123aat,t124c,c126a,c142t,g143a,g175a;LP=2;RP=5;RA=-1.322;PRIOR=false;SR=16;AF=0.155509;AC=1036	.	.	.	0.155509	.	.	.
1	22667984	ALU	TSD=CTGCATTTATCTTT;ASSESS=5;INTERNAL=C1QB,TERMINATOR;SVTYPE=ALU;SVLEN=280;MEINFO=AluYb,1,281,-;DIFF=0.93:c57t,c98a,t144c,g214c,t219c,g231a,g237a,c238t,c240a,g269a;LP=4;RP=5;RA=-0.322;PRIOR=false;SR=5;AF=0.000150105;AC=1	.	.	.	0.000150105	.	.	.
1	22822414	LINE1	TSD=AGAAAAGAAAACAAAAG;ASSESS=5;INTERNAL=NM_001309192,INTRONIC;SVTYPE=LINE1;SVLEN=6013;MEINFO=L1Ambig,6,6019,+;DIFF=0.12:n1-6,i73g,t231c,c251t,t254a,c327t,g352a,n489-6019;LP=19;RP=15;RA=0.341;ISTP=0;PRIOR=false;SR=16;GENE=EPHB2;AF=0.000199681;AC=1	0.000199681	.	.	0.000150105	.	.	.
1	22827594	ALU	TSD=AGAAAATGGGTAATGATGG;ASSESS=5;INTERNAL=EPHB2,INTRONIC;SVTYPE=ALU;SVLEN=281;MEINFO=AluYa5,0,281,+;DIFF=1:t89c,c96a,g145a,c174t,g237c;LP=22;RP=22;RA=0;PRIOR=false;SR=22;AF=0.00030021;AC=2	.	.	.	0.00030021	.	.	.
1	22829083	ALU	TSD=AAGAATTAGAGATTGTG;ASSESS=5;INTERNAL=NM_001309192,INTRONIC;SVTYPE=ALU;SVLEN=281;MEINFO=AluYa4_2,0,281,+;DIFF=1:t89c,c96a,g145a,g237c;LP=38;RP=39;RA=-0.037;PRIOR=false;SR=60;AF=0.002149;AC=3;GENE=EPHB2	0.000798722	0.002149	.	0.000150105	0.015873	.	.
1	22830736	LINE1	TSD=CTCATTTTGTATTTTT;ASSESS=5;INTERNAL=NM_001309192,INTRONIC;SVTYPE=LINE1;SVLEN=6019;MEINFO=L1Ta1d,0,6019,-;DIFF=0.12:c377t,n494-6019;LP=28;RP=31;RA=-0.147;ISTP=0;PRIOR=false;SR=28;AF=0.00143266;AC=2;GENE=EPHB2	0.00139776	0.00143266	.	0.00240168	0.00793651	0.0112847	.
1	22883659	ALU	TSD=GGAGCCCAACTTTCT;ASSESS=5;INTERNAL=NM_001309192,INTRONIC;SVTYPE=ALU;SVLEN=235;MEINFO=AluYb8,46,281,-;DIFF=1:c57t,c64t,c98a,t144c,g211a,c236t,i252gcagtcc,c248g,a252g;LP=22;RP=22;RA=0;PRIOR=false;SR=14;AF=0.000716332;AC=1;GENE=EPHB2	0.000199681	0.000716332	.	.	.	.	.
1	22931731	SVA	TSD=null;ASSESS=4;INTERNAL=LACTBL1,TERMINATOR;SVTYPE=SVA;SVLEN=1236;MEINFO=SVA,79,1315,+;DIFF=0.03:n1-78,c103t,a105g,g110a,n114-115,n117,n119-120,n122-1316;LP=8;RP=3;RA=1.415;PRIOR=false;SR=7;AF=0.214887;AC=1429	.	.	.	0.214887	.	.	.
1	22941321	ALU	TSD=TACAAGTGTTTTT;ASSESS=5;INTERNAL=null,null;SVTYPE=ALU;SVLEN=280;MEINFO=AluYa5,1,281,-;DIFF=0.99:t89c,c96a,g145a,c174t,g237c;LP=19;RP=13;RA=0.547;PRIOR=false;SR=12;AF=0.000199681;AC=1	0.000199681	.	.	.	.	.	.
1	22941378	ALU	TSD=ACATTTTTCTT;ASSESS=5;INTERNAL=LACTBL1,TERMINATOR;SVTYPE=ALU;SVLEN=280;MEINFO=AluYa5,1,281,-;DIFF=1:t89c,c96a,g145a,c174t,a188g,g237c;LP=7;RP=16;RA=-1.193;PRIOR=false;SR=20;AF=0.000150105;AC=1	.	.	.	0.000150105	.	.	.
1	23017197	ALU	TSD=TATATATATATA;ASSESS=5;INTERNAL=NM_001242521,PROMOTER;SVTYPE=ALU;SVLEN=279;MEINFO=AluSq,1,280,+;DIFF=0.96:c4t,c8t,g11a,t65g,i129a,c153g,a163g,g176a,c214t,c231t,c237t,g238a,c239t,g272a,g278a;LP=68;RP=70;RA=-0.042;PRIOR=false;SR=186;AF=0.0285543;AC=143	0.0285543	.	0.0260791	0.0288722	.	.	.
1	23064624	ALU	TSD=AGAATGATACCAGAGG;ASSESS=5;INTERNAL=NM_001009999,INTRONIC;SVTYPE=ALU;SVLEN=281;MEINFO=AluYa5,0,281,+;DIFF=1:t89c,c96a,g145a,g151a,c174t,g237c;LP=19;RP=7;RA=1.441;PRIOR=false;SR=17;AF=0.000716332;AC=1;GENE=KDM1A	0.000199681	0.000716332	.	.	.	.	.
1	23104934	ALU	TSD=TGCCCTACTTTT;ASSESS=5;INTERNAL=NM_033631,INTRONIC;SVTYPE=ALU;SVLEN=280;MEINFO=AluYa3_5,1,281,-;DIFF=1:c96a,g145a,c174t,c236t;LP=30;RP=58;RA=-0.951;PRIOR=false;SR=17;AF=0.000716332;AC=1;GENE=LUZP1	0.000199681	0.000716332	.	.	.	.	.
1	23147637	ALU	TSD=AAAAAAAAAAAAAAAAAAAAAAAAA;ASSESS=5;INTERNAL=LUZP1,INTRONIC;SVTYPE=ALU;SVLEN=279;MEINFO=AluSz,1,280,+;DIFF=0.7:t65g,t78a,c111a,i129a,g140a,g142a,c143t,c197g,t200g,a204g,t245c,c261t,c269t,g270a;LP=11;RP=20;RA=-0.862;PRIOR=false;SR=18;AF=0.0030021;AC=20	.	.	.	0.0030021	.	.	.
1	23243565	SVA	TSD=null;ASSESS=3;INTERNAL=null,null;SVTYPE=SVA;SVLEN=1240;MEINFO=SVA,75,1315,+;DIFF=0.36:n1-870,g880c,g921c,g938a,c945a,t970c,t985c,g1009t,a1053g,g1067a,a1079g,c1129g,c1146a,c1163a,c1164t,t1267c,g1268a,g1310t;LP=13;RP=8;RA=0.7;PRIOR=false;SR=6;AF=0.000199681;AC=1	0.000199681	.	.	.	.	.	.
1	23243579	SVA	TSD=AAAAATAAATTGCC;ASSESS=5;INTERNAL=null,null;SVTYPE=SVA;SVLEN=1240;MEINFO=SVA,75,1315,+;DIFF=0.39:n1-895,g921c,g938a,c945a,t970c,t985c,g1009t,a1053g,g1067a,a1079g,c1129g,c1146a,c1163a,c1164t,t1267c,g1268a,g1310t;LP=14;RP=14;RA=0;PRIOR=false;SR=9;AF=0.000716332;AC=1	.	0.000716332	.	0.000150105	.	.	.
1	23269708	ALU	TSD=TCTAATTTTCTT;ASSESS=5;INTERNAL=LINC01355,TERMINATOR;SVTYPE=ALU;SVLEN=245;MEINFO=AluYb3a1,36,281,-;DIFF=1:c57t,c64t,c98a,g211a,c236t,c248g;LP=28;RP=54;RA=-0.948;PRIOR=false;SR=11;AF=0.000150105;AC=1	.	.	.	0.000150105	.	.	.
1	23278028	ALU	TSD=dAAAA;ASSESS=5;INTERNAL=NR_110616,TERMINATOR;SVTYPE=ALU;SVLEN=279;MEINFO=AluSg,1,280,-;DIFF=1:c57t,d65-66,i129a,c153g,c214t,g232a,c249t,c261t,g270a,g278t;LP=51;RP=28;RA=0.865;PRIOR=false;SR=31;AF=0.000868056;AC=1	.	.	.	.	.	0.000868056	.
1	23292284	SVA	TSD=TAATGTAAGTTTTCT;ASSESS=5;INTERNAL=NR_110616,PROMOTER;SVTYPE=SVA;SVLEN=471;MEINFO=SVA,844,1315,-;DIFF=0.32:n1-843,g880c,a886g,g898a,t922g,g927c,a931g,a934t,g938a,c945a,g1009t,c1019t,a1053g,g1067a,a1079g,c1129g,c1157t,i1185aaggcc,g1268a,t1292c;LP=15;RP=1;RA=3.907;PRIOR=false;SR=11;AF=0.000199681;AC=1	0.000199681	.	.	.	.	.	.
1	23327995	ALU	TSD=null;ASSESS=3;INTERNAL=NM_001297622,INTRONIC;SVTYPE=ALU;SVLEN=181;MEINFO=AluSg,100,281,+;DIFF=1:c4t,c8t,g11a,c48t,c53t,c57t,d65-66,i129a,c153g,g176a,g238a,g270a,g278a;LP=70;RP=69;RA=0.021;PRIOR=false;SR=7;AF=0.0078125;AC=9	.	.	.	.	.	0.0078125	.
1	23362055	ALU	TSD=null;ASSESS=4;INTERNAL=ZNF436,EXON_4;SVTYPE=ALU;SVLEN=279;MEINFO=AluYc1,1,280,+;DIFF=0.98:c10t,a76t,t93c,c98t,g110a,g148a,c150t,g152t,g269a;LP=24;RP=25;RA=-0.059;PRIOR=false;SR=3;AF=1.00735e-05;AC=1	.	.	.	.	.	.	1.00735e-05
1	23370914	ALU	TSD=AATAACCACGCTCCT;ASSESS=5;INTERNAL=NR_033691,INTRONIC;SVTYPE=ALU;SVLEN=81;MEINFO=AluYb,200,281,+;DIFF=0.29:g211a,c236t,c248g,i252gcagtcc,g253a,a252g;LP=4;RP=5;RA=-0.322;PRIOR=false;SR=6;AF=0.000716332;AC=1;GENE=ZNF436-AS1	.	0.000716332	.	.	.	.	.
1	23392093	ALU	TSD=AAGATCAGAT;ASSESS=5;INTERNAL=TCEA3,INTRONIC;SVTYPE=ALU;SVLEN=280;MEINFO=AluYa5,1,281,-;DIFF=1:t89c,c96a,g145a,c174t,g237c;LP=117;RP=98;RA=0.256;PRIOR=false;SR=103;AF=0.00120084;AC=8	.	.	.	0.00120084	.	.	.
1	23392408	ALU	TSD=null;ASSESS=4;INTERNAL=NM_003196,INTRONIC;SVTYPE=ALU;SVLEN=272;MEINFO=AluY,9,281,-;DIFF=1:g9a,c78t;LP=133;RP=164;RA=-0.302;PRIOR=false;SR=41;AF=0.000599042;AC=3	0.000599042	.	.	.	.	.	.
1	23435514	SVA	TSD=AAAGAAAAAGATATT;ASSESS=5;INTERNAL=NM_017707,INTRONIC;SVTYPE=SVA;SVLEN=1316;MEINFO=SVA,0,1316,+;DIFF=0.3:n1-906,g938a,c945a,g1005c,g1009t,a1053g,g1067a,a1079g,g1268a,c1289g,t1292c,n1308;LP=1;RP=11;RA=-3.459;PRIOR=false;SR=6;AF=0.000716332;AC=1;GENE=ASAP3	0.000199681	0.000716332	.	.	.	.	.
1	23485385	SVA	TSD=null;ASSESS=3;INTERNAL=NM_017707,PROMOTER;SVTYPE=SVA;SVLEN=337;MEINFO=SVA,978,1315,+;DIFF=0.23:n1-977,g1009t,c1019a,a1041g,a1053g,g1067a,a1068g,a1079g,a1102g,a1116g,c1129g,a1132g,c1157t,a1178g,g1268a,t1292c;LP=1;RP=11;RA=-3.459;PRIOR=false;SR=7;AF=0.000199681;AC=1	0.000199681	.	.	.	.	.	.
1	23504967	ALU	TSD=null;ASSESS=3;INTERNAL=NM_004091,TERMINATOR;SVTYPE=ALU;SVLEN=279;MEINFO=AluY,1,280,+;DIFF=1:g49a,c57t,i65gt,a76t,t86g,c98t,g199t,c206t,c236t,c238t,g265c,g269a;LP=16;RP=12;RA=0.415;PRIOR=false;SR=3;AF=0.00347222;AC=4	.	.	.	.	.	0.00347222	.
1	23519162	ALU	TSD=AAGAAAAGTGACTGTC;ASSESS=5;INTERNAL=E2F2,INTRONIC;SVTYPE=ALU;SVLEN=281;MEINFO=AluY,0,281,+;DIFF=0.23:d84-281;LP=3;RP=1;RA=1.585;PRIOR=false;SR=7;AF=1.00737e-05;AC=1	.	.	.	.	.	.	1.00737e-05
1	23524091	ALU	TSD=dCAACAACAACAAC;ASSESS=5;INTERNAL=NR_110799,INTRONIC;SVTYPE=ALU;SVLEN=279;MEINFO=AluY,1,280,+;DIFF=1:c57t,g79a,c98t,g110a,g143a,c150t,g175a,g237a,g239a,c276t;LP=28;RP=23;RA=0.284;PRIOR=false;SR=114;AF=0.117479;AC=164;GENE=E2F2	0.169728	0.117479	0.186151	.	.	0.237847	.
1	23544958	ALU	TSD=AAGAATTGTGCTGGG;ASSESS=5;INTERNAL=null,null;SVTYPE=ALU;SVLEN=281;MEINFO=AluYa4_5,0,281,+;DIFF=1:t89c,c96a,g145a,c174t,c236t;LP=15;RP=14;RA=0.1;PRIOR=false;SR=25;AF=0.000199681;AC=1	0.000199681	.	.	0.00105074	.	.	.
1	23654652	ALU	TSD=AACAGATGGGGCATC;ASSESS=5;INTERNAL=null,null;SVTYPE=ALU;SVLEN=280;MEINFO=AluYa4_5,1,281,+;DIFF=1:t89c,c96a,t111a,g145a,c174t,g207a;LP=4396;RP=4390;RA=0.002;PRIOR=false;SR=5192;AF=0.17765;AC=248	0.163538	0.17765	0.241457	0.202342	0.285714	0.242188	.
1	23664742	ALU	TSD=CAGCCCTGTATTTTTTA;ASSESS=5;INTERNAL=MDS2,TERMINATOR;SVTYPE=ALU;SVLEN=279;MEINFO=AluYb8,2,281,-;DIFF=1:c57t,c64t,c98a,t144c,g211a,c236t,c248g,i252gcagtcc,g253a,a252g;LP=15;RP=16;RA=-0.093;PRIOR=false;SR=15;AF=0.000150105;AC=1	.	.	.	0.000150105	.	.	.
1	23681888	SVA	TSD=null;ASSESS=3;INTERNAL=NM_000975,PROMOTER;SVTYPE=SVA;SVLEN=1240;MEINFO=SVA,75,1315,-;DIFF=0.23:n1-959,g1009t,c1019t,a1053g,g1067a,a1079g,c1129g,c1157t,i1185aaggcc,g1268a,t1292c;LP=2;RP=17;RA=-3.087;PRIOR=false;SR=4;AF=0.000716332;AC=1	0.000199681	0.000716332	.	.	.	.	.
1	23689806	LINE1	TSD=null;ASSESS=4;INTERNAL=RPL11,PROMOTER;SVTYPE=LINE1;SVLEN=333;MEINFO=L1Ta,5686,6019,+;DIFF=0.01:n1-5686,c5690t,c5715a,n5769-5839,n5841,n5843,n5846-5847,n5855-5859,t5860g,g5864a,n5866-5866,t5869g,n5876-5878,n5884,n5889,n5952-5968,a6006g;LP=3;RP=2;RA=0.585;ISTP=-1;PRIOR=false;SR=5;AF=0.000150105;AC=1	.	.	.	0.000150105	.	.	.
1	23720997	ALU	TSD=AAAAAAAAAAAAAAAAAAAAAAAAAAA;ASSESS=5;INTERNAL=ELOA,PROMOTER;SVTYPE=ALU;SVLEN=279;MEINFO=AluSz,1,280,-;DIFF=0.63:c4t,c8t,g54a,c57t,t65g,i129a,g137a,g144a,c155t,a163g,g187a,c207t,c214t,g215t,g222a,c231t,c237t,c239t,g246a,c249t,t250c,g254t,d258-282;LP=19;RP=23;RA=-0.276;PRIOR=false;SR=23;AF=0.00555389;AC=37	.	.	0.000899281	0.00555389	.	.	.
1	23741989	ALU	TSD=GTTCAATGCCTTTTCT;ASSESS=5;INTERNAL=NM_003198,PROMOTER;SVTYPE=ALU;SVLEN=280;MEINFO=AluYb8,1,281,-;DIFF=1:c57t,c64t,c98a,t144c,g211a,c236t,c248g,i252gcagtcc,g253a,a252g;LP=22;RP=18;RA=0.29;PRIOR=false;SR=23;AF=0.000716332;AC=1	0.000399361	0.000716332	.	0.000150105	.	.	.
1	23782001	ALU	TSD=AAAATGTACCATTATA;ASSESS=5;INTERNAL=NM_020362,INTRONIC;SVTYPE=ALU;SVLEN=279;MEINFO=AluY,1,280,+;DIFF=1:c53t,c57t,i65gt,t86g,c98t,c236t;LP=39;RP=73;RA=-0.904;PRIOR=false;SR=17;AF=0.000199681;AC=1	0.000199681	.	.	.	.	.	.
1	23796369	LINE1	TSD=null;ASSESS=1;INTERNAL=GALE,INTRONIC;SVTYPE=LINE1;SVLEN=4355;MEINFO=L1Ambig,1663,6018,-;DIFF=0.06:n1-4650,t4712c,c4778t,n4801-6019;LP=9;RP=9;RA=0;ISTP=-1;PRIOR=false;SR=0;AF=1.00811e-05;AC=1	.	.	.	.	.	.	1.00811e-05
1	23819033	ALU	TSD=AAAAAAAAAAAAAAAAAAAAAAAAAAA;ASSESS=5;INTERNAL=NM_001166059,INTRONIC;SVTYPE=ALU;SVLEN=279;MEINFO=AluSz,1,280,-;DIFF=0.93:g11a,c48t,t65g,c95t,i129a,c143t,c151t,g154a,c197g,c237t,g240a,c244t,c261a,d266-282;LP=60;RP=58;RA=0.049;PRIOR=false;SR=42;AF=0.0669565;AC=77	.	.	0.0067446	.	.	0.0669565	.
1	23854342	SVA	TSD=AAAAAAAAAAAAACAAAAACAAAAAA;ASSESS=5;INTERNAL=FUCA1,INTRONIC;SVTYPE=SVA;SVLEN=446;MEINFO=SVA,869,1315,-;DIFF=0.25:n1-868,g883a,t889c,a897g,g921a,c945a,t946c,n968-984,g995t,t1016c,a1044g,a1053g,g1067a,a1079g,c1129g,c1205a,t1249c,g1268a,n1303-1316;LP=1;RP=81;RA=-6.34;PRIOR=false;SR=8;AF=0.000302218;AC=30	.	.	.	.	.	.	0.000302218
1	23861539	ALU	TSD=AAGAGTTGGAACT;ASSESS=5;INTERNAL=NM_000147,INTRONIC;SVTYPE=ALU;SVLEN=279;MEINFO=AluY,1,280,+;DIFF=0.98:a76t,c236t;LP=65;RP=103;RA=-0.664;PRIOR=false;SR=16;AF=0.000199681;AC=1	0.000199681	.	.	.	.	.	.
1	23911622	ALU	TSD=AAAGAAAAGATCA;ASSESS=5;INTERNAL=NM_001841,INTRONIC;SVTYPE=ALU;SVLEN=281;MEINFO=AluYb8,0,281,+;DIFF=1:g21a,c57t,c64t,c98a,t144c,g211a,c236t,i252gcagtcc,c248g,a252g;LP=21;RP=37;RA=-0.817;PRIOR=false;SR=12;AF=0.000199681;AC=1	0.000199681	.	.	.	.	.	.
1	23919567	ALU	TSD=TTATTTATTTATTTATTTATTTATTTATTT;ASSESS=5;INTERNAL=NR_039615,PROMOTER;SVTYPE=ALU;SVLEN=279;MEINFO=AluY,1,280,+;DIFF=0.95:c53t,g65a,c78t,t86g,t93c,c98t,c142t,g199t,g207a,g214a,c260t,g269a,d281;LP=104;RP=171;RA=-0.717;PRIOR=false;SR=260;AF=0.0244328;AC=28	.	.	.	.	.	0.0244328	.
1	23930414	ALU	TSD=TTTTTTTTTTTTTTTTTTTTTTTTTTTT;ASSESS=5;INTERNAL=NR_039615,TERMINATOR;SVTYPE=ALU;SVLEN=279;MEINFO=AluY,1,280,-;DIFF=1:g11a,i65gt,a76t,t86g,c98t,g151a,c230t,c236t,c260t,c276t;LP=59;RP=92;RA=-0.641;PRIOR=false;SR=45;AF=0.166087;AC=191	.	.	.	.	.	0.166087	.
1	23935274	ALU	TSD=null;ASSESS=1;INTERNAL=MIR378F,TERMINATOR;SVTYPE=ALU;SVLEN=279;MEINFO=AluSg,1,280,-;DIFF=0.4:g5a,g9a,c10t,g21a,c23a,g42a,g49a,c53t,g58a,d65-66,i129n,g140a,c214t,c223t,g238a,d262-282;LP=3;RP=8;RA=-1.415;PRIOR=false;SR=0;AF=0.000639591;AC=4	.	.	.	0.000639591	.	.	.
1	23938815	ALU	TSD=AAAAAAAAAAAAAAAAA;ASSESS=5;INTERNAL=NR_039615,TERMINATOR;SVTYPE=ALU;SVLEN=279;MEINFO=AluY,1,280,-;DIFF=1:c4t,c10a,g11a,g58a,a76t,t86g,c98t,c109t,c238t,g269a,g277a;LP=123;RP=148;RA=-0.267;PRIOR=false;SR=11;AF=0.00520833;AC=6	.	.	.	.	.	0.00520833	.
1	23977885	ALU	TSD=AAAAAAAAAAAAAA;ASSESS=5;INTERNAL=SRSF10,INTRONIC;SVTYPE=ALU;SVLEN=279;MEINFO=AluY,1,280,-;DIFF=0.98:g54a,c57t,t93c,c98t,c106t,g110a,c138t,g143a,g145a,g155a,c238t,g261a,c276t,g277a;LP=15;RP=35;RA=-1.222;PRIOR=false;SR=12;AF=0.000594339;AC=59	.	.	.	.	.	.	0.000594339
1	23982496	SVA	TSD=CCGGCCTTGTTTTTAATTTTT;ASSESS=5;INTERNAL=NM_006625,PROMOTER;SVTYPE=SVA;SVLEN=1190;MEINFO=SVA,126,1316,-;DIFF=0.34:n1-410,n422,i433c,c440a,c449t,c452t,c453g,g456a,a487c,a513g,c522t,a561c,t564c,t565a,t580c,t582c,i600ga,n607-608,g632a,c635t,a653g,i658c,a668g,c674t,c677t,g681a,t729c,c747t,g764c,n769-1056,n1058,n1065,g1067a,a1079g,n1105,n1122,n1126,c1129g,n1130,n1137,c1146a,n1149,c1163a,c1164t,n116…	.	.	.	.	.	0.000868056	.
1	24002295	ALU	TSD=ACCTAATAGGATTTC;ASSESS=5;INTERNAL=null,null;SVTYPE=ALU;SVLEN=276;MEINFO=AluYb7_4,5,281,-;DIFF=1:c57t,c64t,c98a,i127aa,t144c,i211ggc,c236t,i252gcagtcc,c248g,a252g;LP=229;RP=211;RA=0.118;PRIOR=false;SR=259;AF=0.0100287;AC=14	0.0091853	0.0100287	.	0.0197704	0.00793651	0.0164931	.
1	24031279	ALU	TSD=TTTTTTTTTTTTTTTTTTTTTT;ASSESS=5;INTERNAL=null,null;SVTYPE=ALU;SVLEN=279;MEINFO=AluY,1,280,+;DIFF=1:c98t,c154t,g175a,c218g,c230t,g237a,g269a,g277a;LP=31;RP=35;RA=-0.175;PRIOR=false;SR=16;AF=0.00638978;AC=32	0.00638978	.	.	.	.	.	.
1	24067422	ALU	TSD=TTC;ASSESS=5;INTERNAL=NM_152372,INTRONIC;SVTYPE=ALU;SVLEN=279;MEINFO=AluY,1,280,+;DIFF=1:g5a,c8t,g54a,c57t,i65gt,a76t,t86g,t93c,c98t,g151a,g207a,c276t;LP=9;RP=39;RA=-2.115;PRIOR=false;SR=14;AF=0.0078125;AC=9	.	.	.	.	.	0.0078125	.
1	24122366	ALU	TSD=null;ASSESS=3;INTERNAL=NM_021258,INTRONIC;SVTYPE=ALU;SVLEN=279;MEINFO=AluY,1,280,+;DIFF=0.92:g5a,g79a,g139a,c174t,g196c,g199t,c206t,g214a,c218g,c222t,a227g,g231a,g237a,g239t,c243t,c246g,g258a,c260t,g261a,g269a;LP=15;RP=34;RA=-1.181;PRIOR=false;SR=4;AF=0.00260417;AC=3	.	.	.	.	.	0.00260417	.
1	24162752	ALU	TSD=null;ASSESS=3;INTERNAL=NM_170743,INTRONIC;SVTYPE=ALU;SVLEN=279;MEINFO=AluSz,1,280,-;DIFF=1:g11a,c48t,t65g,g112a,i129a,c231t,g262a,c277t,g278a;LP=81;RP=63;RA=0.363;PRIOR=false;SR=12;AF=0.00782609;AC=9	.	.	.	.	.	0.00782609	.
1	24162756	ALU	TSD=null;ASSESS=3;INTERNAL=NM_170743,INTRONIC;SVTYPE=ALU;SVLEN=279;MEINFO=AluSz,1,280,-;DIFF=1:g9a,g11a,g54a,t65g,t78a,i129a,g152a,a163g,c197g,c214t,g240a;LP=35;RP=51;RA=-0.543;PRIOR=false;SR=7;AF=0.00219649;AC=11	0.00219649	.	.	.	.	.	.
1	24281000	SVA	TSD=CATTCCTTTTTATT;ASSESS=5;INTERNAL=null,null;SVTYPE=SVA;SVLEN=1304;MEINFO=SVA,12,1316,-;DIFF=0.38:n1-881,g921a,g938a,c945a,t970c,t985c,g1009t,a1053g,g1067a,a1079g,c1128t,c1129g,c1146a,c1163a,c1164t,t1267c,g1268a,g1310t;LP=26;RP=6;RA=2.115;PRIOR=false;SR=21;AF=0.000399361;AC=2	0.000399361	.	.	.	.	.	.
1	24316747	ALU	TSD=null;ASSESS=4;INTERNAL=GRHL3,PROMOTER;SVTYPE=ALU;SVLEN=279;MEINFO=AluY,1,280,+;DIFF=0.85:c4t,c8t,g11a,g15t,c20t,g49a,c53t,c57t,g58a,c64t,c70t,g79a,t86c,c98t,g102a,c109t,c114g,t124a,c126a,g139a,g143a,g162a,g199a,c206t,c213t,g215c,g221a,c230t,g237t,c254a;LP=5;RP=7;RA=-0.485;PRIOR=false;SR=2;AF=0.00255179;AC=17	.	.	.	0.00255179	.	.	.
1	24369107	ALU	TSD=AGAACTCTGCCCA;ASSESS=5;INTERNAL=NM_001199012,INTRONIC;SVTYPE=ALU;SVLEN=281;MEINFO=AluY,0,281,+;DIFF=0.98:NoDifferences;LP=45;RP=86;RA=-0.934;PRIOR=false;SR=12;AF=0.000199681;AC=1	0.000199681	.	.	.	.	.	.
1	24389187	ALU	TSD=AAAAACGTTCTGAG;ASSESS=5;INTERNAL=NM_001199012,INTRONIC;SVTYPE=ALU;SVLEN=280;MEINFO=AluYa4_2,1,281,+;DIFF=1:t89c,c96a,c98t,g145a,a188g,g237c;LP=15;RP=18;RA=-0.263;PRIOR=false;SR=8;AF=0.000199681;AC=1	0.000199681	.	.	.	.	.	.
1	24507045	SVA	TSD=null;ASSESS=3;INTERNAL=NM_001251977,INTRONIC;SVTYPE=SVA;SVLEN=1240;MEINFO=SVA,75,1315,+;DIFF=0.32:n1-894,g898a,t922g,g927c,a931g,a934t,g938a,c945a,g1009t,c1019t,a1053g,g1067a,a1079g,c1129g,c1157t,i1185aaggcc,g1268a,t1292c;LP=3;RP=12;RA=-2;PRIOR=false;SR=7;GENE=RCAN3;AF=0.000199681;AC=1	0.000199681	.	.	.	.	.	.
1	24507062	SVA	TSD=TAAATTGCACTTGGTTT;ASSESS=5;INTERNAL=NM_001251977,INTRONIC;SVTYPE=SVA;SVLEN=1290;MEINFO=SVA,26,1316,+;DIFF=0.41:n1-850,g880c,a886g,g898a,t922g,g927c,a931g,a934t,g938a,c945a,g1009t,c1019t,a1053g,g1067a,a1079g,c1129g,c1157t,i1185aaggcc,g1268a,t1292c;LP=3;RP=14;RA=-2.222;PRIOR=false;SR=12;AF=0.000716332;AC=1;GENE=RCAN3	.	0.000716332	.	.	.	.	.
1	24519999	ALU	TSD=AAGAAAAGTA;ASSESS=5;INTERNAL=RCAN3,INTRONIC;SVTYPE=ALU;SVLEN=281;MEINFO=AluYa5,0,281,+;DIFF=1:t89c,c96a,g145a,c174t,g237c;LP=7;RP=7;RA=0;PRIOR=false;SR=10;AF=0.000150105;AC=1	.	.	.	0.000150105	.	.	.
1	24523634	ALU	TSD=ACACACACACACACACACACACACACA;ASSESS=5;INTERNAL=NM_001251980,INTRONIC;SVTYPE=ALU;SVLEN=279;MEINFO=AluY,1,280,-;DIFF=1:c8t,c53t,c57t,i65gt,a76t,c78t,t93c,c98t,g277a;LP=80;RP=101;RA=-0.336;PRIOR=false;SR=4;AF=0.000199681;AC=1	0.000199681	.	.	.	.	.	.
1	24531121	ALU	TSD=AACTTATAATGAGTTCTT;ASSESS=5;INTERNAL=NM_001251980,INTRONIC;SVTYPE=ALU;SVLEN=280;MEINFO=AluYb8,1,281,-;DIFF=1:c57t,c64t,g72a,c98a,t144c,g211a,c236t,i252gcagtcc,c248g,a252g;LP=1534;RP=1514;RA=0.019;PRIOR=false;SR=1957;AF=0.0881089;AC=123;GENE=RCAN3	0.0684904	0.0881089	.	0.201891	0.015873	0.0199653	.
1	24573952	ALU	TSD=null;ASSESS=3;INTERNAL=NM_001010980,INTRONIC;SVTYPE=ALU;SVLEN=279;MEINFO=AluSg,1,280,-;DIFF=0.96:d65-66,c80t,i129a,c139t,g152a,c153g,a163g,c197g,g268c,c269a,d280-282;LP=67;RP=96;RA=-0.519;PRIOR=false;SR=17;AF=0.0304348;AC=35	.	.	.	0.156884	.	0.0304348	.
1	24577431	ALU	TSD=TTTTTTTTTTTTTTTTTTTTTTTTTTTTTT;ASSESS=5;INTERNAL=NM_001010980,INTRONIC;SVTYPE=ALU;SVLEN=279;MEINFO=AluY,1,280,-;DIFF=0.98:g5a,g11a,c48t,c53t,c57t,i65gt,t86g,c98t,g237a;LP=137;RP=109;RA=0.33;PRIOR=false;SR=104;AF=0.0963542;AC=111	0.148163	.	.	.	.	0.0963542	.
1	24593879	ALU	TSD=TTATTTATTTATTT;ASSESS=5;INTERNAL=NM_001010980,INTRONIC;SVTYPE=ALU;SVLEN=138;MEINFO=AluY,143,281,-;DIFF=1:c4t,c20t,g58a,c98t,c230t,c238t,g261a,c276t;LP=42;RP=78;RA=-0.893;PRIOR=false;SR=9;AF=0.00173611;AC=2	.	.	.	.	.	0.00173611	.
1	24597617	ALU	TSD=null;ASSESS=3;INTERNAL=NCMAP,INTRONIC;SVTYPE=ALU;SVLEN=269;MEINFO=AluY,11,280,-;DIFF=0.71:c32t,c48t,c57t,t69a,a76t,c78t,t93c,c138g,g151a,g155t,g190a,c230t,g239a,g261a,c268t,g269a,c276t;LP=52;RP=14;RA=1.893;PRIOR=false;SR=6;AF=0.00540378;AC=36	.	.	.	0.00540378	.	.	.
1	24614786	ALU	TSD=GAGTTAATTTTT;ASSESS=5;INTERNAL=NM_001010980,TERMINATOR;SVTYPE=ALU;SVLEN=280;MEINFO=AluYb3a1,1,281,-;DIFF=1:c57t,c64t,g143a,t144c,g211a,c236t,i252gcagtcc,c248g,a252g;LP=7664;RP=6482;RA=0.242;PRIOR=false;SR=9032;AF=0.277221;AC=387	0.254992	0.277221	0.203237	0.401531	0.253968	0.25	.
1	24622559	ALU	TSD=dCCGG;ASSESS=5;INTERNAL=null,null;SVTYPE=ALU;SVLEN=279;MEINFO=AluY,1,280,+;DIFF=0.93:a76t,t86g,t93c,c98t,g110a,g143a,g152c,c154t,c174t,g177c,g214a,c268t,g277a;LP=8;RP=9;RA=-0.17;PRIOR=false;SR=35;AF=0.0487106;AC=68	.	0.0487106	0.0611511	.	.	.	.
1	24652417	ALU	TSD=null;ASSESS=4;INTERNAL=SRRM1,INTRONIC;SVTYPE=ALU;SVLEN=279;MEINFO=AluY,1,280,+;DIFF=1:g49a,t93c,d127,g151a;LP=16;RP=25;RA=-0.644;PRIOR=false;SR=10;AF=0.00955979;AC=949	.	.	.	.	.	.	0.00955979
1	24654170	SVA	TSD=null;ASSESS=4;INTERNAL=SRRM1,INTRONIC;SVTYPE=SVA;SVLEN=318;MEINFO=SVA,997,1315,-;DIFF=0.15:n1-996,g1009t,a1053g,g1067a,a1079g,c1129g,g1268a,t1292c,t1312a;LP=11;RP=1;RA=3.459;PRIOR=false;SR=4;AF=0.000150105;AC=1	.	.	.	0.000150105	.	.	.
1	24685138	ALU	TSD=AAAAAAAAAAAAAAAA;ASSESS=5;INTERNAL=null,null;SVTYPE=ALU;SVLEN=279;MEINFO=AluSz,1,280,-;DIFF=0.99:g5a,c53t,c57t,t65g,g69a,g81a,c95t,c98t,i129a,g140a,g152a,g154t,c155a,c175t,c197g,g232a,c237t,c239t,c261t,c269t;LP=112;RP=87;RA=0.364;PRIOR=false;SR=33;AF=0.00520833;AC=6	.	.	.	.	.	0.00520833	.
1	24752253	ALU	TSD=AAAACTGTTAATCTG;ASSESS=5;INTERNAL=NM_013943,INTRONIC;SVTYPE=ALU;SVLEN=280;MEINFO=AluYa2,1,281,+;DIFF=1:c98a,g145a,c174t,g196c,g197a,g199t,c218t,c230t,g237a;LP=77;RP=97;RA=-0.333;PRIOR=false;SR=13;AF=0.000199681;AC=1	0.000199681	.	.	.	.	.	.
1	24767024	ALU	TSD=null;ASSESS=3;INTERNAL=NM_013943,INTRONIC;SVTYPE=ALU;SVLEN=277;MEINFO=AluY,3,280,+;DIFF=0.96:g21a,c48t,i65gt,a76t,c78t,t86g,c87t,t93c,c98t,g110a,g239a,g277a;LP=7;RP=21;RA=-1.585;PRIOR=false;SR=14;AF=0.0217014;AC=25	.	.	.	.	.	0.0217014	.
1	24775244	ALU	TSD=TTTTTTTTTTTTTTT;ASSESS=5;INTERNAL=CLIC4,INTRONIC;SVTYPE=ALU;SVLEN=230;MEINFO=AluSc,51,281,-;DIFF=0.63:c57a,d65-66,g67a,t78a,g88t,i129a,g140a,c143t,c151t,g154a,c155t,g156a,c157t,c158t,c175t,g270a,d274-282;LP=11;RP=16;RA=-0.541;PRIOR=false;SR=2;GENE=CLIC4;AF=0.011241;AC=25	.	.	0.011241	.	.	.	.
1	24775581	ALU	TSD=CCCTCTCTTTTCTTTT;ASSESS=5;INTERNAL=NM_013943,INTRONIC;SVTYPE=ALU;SVLEN=242;MEINFO=AluYa,39,281,-;DIFF=0.86:t89c,c96a,g145a,c174t,g237c,g261a,i127a;LP=22;RP=11;RA=1;PRIOR=false;SR=18;AF=0.000199681;AC=1	0.000199681	.	.	0.000150105	.	.	.
1	24781967	SVA	TSD=null;ASSESS=4;INTERNAL=NM_013943,INTRONIC;SVTYPE=SVA;SVLEN=1240;MEINFO=SVA,75,1315,-;DIFF=0.38:n1-783,c801g,n802,n814,a825g,a827g,n833,a836g,a838g,n840,g880c,a886g,g898a,t922g,g927c,a931g,a934t,g938a,c945a,g1009t,c1019t,a1053g,g1067a,a1079g,c1129g,c1157t,i1185aaggcc,g1268a,t1292c;LP=21;RP=3;RA=2.807;PRIOR=false;SR=11;AF=0.000716332;AC=1;GENE=CLIC4	0.000599042	0.000716332	.	.	.	.	.
1	24789694	ALU	TSD=null;ASSESS=3;INTERNAL=NM_013943,INTRONIC;SVTYPE=ALU;SVLEN=279;MEINFO=AluY,1,280,+;DIFF=1:g9a,g11a,g79a,c98t,c109t,g143a,c150t,g175a,g199t,g207a,c238t,g277a;LP=64;RP=68;RA=-0.087;PRIOR=false;SR=5;AF=0.000868056;AC=1	.	.	.	.	.	0.000868056	.
1	24833422	ALU	TSD=null;ASSESS=2;INTERNAL=CLIC4,INTRONIC;SVTYPE=ALU;SVLEN=279;MEINFO=AluSg,1,280,-;DIFF=0.83:g5a,g9a,g11t,g49c,g54a,g58a,g59t,d65-66,g81a,g101t,c111t,g112a,t126c,i129n,c139a,g140a,g147a,g149a,g152a,c153g,g156a,g187a,c197t,c206t,c207t,c214t,c231t,g232a,a233g,g238a,a263g,c269t,d276-282;LP=7;RP=1;RA=2.807;PRIOR=false;SR=0;AF=0.040293;AC=264	.	.	.	0.040293	.	.	.
1	24835018	ALU	TSD=null;ASSESS=3;INTERNAL=NM_013943,INTRONIC;SVTYPE=ALU;SVLEN=279;MEINFO=AluSz,1,280,-;DIFF=0.89:c4t,g49a,g54a,t65g,i129a,g152a,c153g,g156a,a163g,c207t,c214t,g219c,g238a,d262-282;LP=63;RP=21;RA=1.585;PRIOR=false;SR=498;AF=0.315096;AC=1578	0.315096	.	.	.	.	.	.
1	25028246	ALU	TSD=CCTTCTTCCTCTTCTTTCT;ASSESS=5;INTERNAL=NR_039623,TERMINATOR;SVTYPE=ALU;SVLEN=180;MEINFO=AluYd,101,281,-;DIFF=0.65:t144c,i167agctactcgg;LP=3;RP=9;RA=-1.585;PRIOR=false;SR=13;AF=0.000199681;AC=1	0.000199681	.	.	.	.	.	.
1	25044977	ALU	TSD=AG;ASSESS=5;INTERNAL=null,null;SVTYPE=ALU;SVLEN=271;MEINFO=AluY,9,280,+;DIFF=0.77:c16a,g45a,c53t,g54a,c57t,g58a,g65a,g72a,c78t,t93c,c98t,g110a,c138t,g145c,g152t,c154t,g199a,g214a,g224a,c229a,g231a,t256a,c268t;LP=124;RP=36;RA=1.784;PRIOR=false;SR=26;AF=0.00199681;AC=10	0.00199681	.	.	.	.	.	.
1	25053641	ALU	TSD=GAAAATGAGGCTG;ASSESS=5;INTERNAL=null,null;SVTYPE=ALU;SVLEN=280;MEINFO=AluYa5,1,281,+;DIFF=1:t89c,c96a,a119g,g145a,c174t,g237c;LP=10;RP=7;RA=0.515;PRIOR=false;SR=10;AF=0.000199681;AC=1	0.000199681	.	.	.	.	.	.
1	25069963	ALU	TSD=GACATGTCTGTTTT;ASSESS=5;INTERNAL=null,null;SVTYPE=ALU;SVLEN=280;MEINFO=AluYb5,1,281,-;DIFF=1:c57t,c64t,c98a,t144c,g199t,c236t,c260t,g269a;LP=26;RP=29;RA=-0.158;PRIOR=false;SR=10;AF=0.000199681;AC=1	0.000199681	.	.	.	.	.	.
1	25221812	ALU	TSD=AAAAAAAAAAAAA;ASSESS=5;INTERNAL=NM_015484,TERMINATOR;SVTYPE=ALU;SVLEN=279;MEINFO=AluSg,1,280,+;DIFF=0.99:d65-66,c95t,i129a,c151t,g154a,g156a,a163g,c175t,g198c,t200a,c207t,g208a,c214t,g215a,g219c,g232a,g240a,g278a;LP=63;RP=66;RA=-0.067;PRIOR=false;SR=7;AF=0.00173611;AC=2	.	.	.	.	.	0.00173611	.
1	25236802	ALU	TSD=AGAAAGGAAAGATGTG;ASSESS=5;INTERNAL=NM_015484,PROMOTER;SVTYPE=ALU;SVLEN=279;MEINFO=AluYg,2,281,+;DIFF=1:c4t,g54a,t89c,t173a,c229t;LP=284;RP=303;RA=-0.093;PRIOR=false;SR=405;AF=0.0186246;AC=26	0.0145767	0.0186246	.	0.0375263	.	0.00173611	.
1	25248181	ALU	TSD=AAAACTGACCTTTA;ASSESS=5;INTERNAL=NM_020317,PROMOTER;SVTYPE=ALU;SVLEN=281;MEINFO=AluYa5,0,281,+;DIFF=1:t89c,c96a,g145a,c174t,g237c;LP=25;RP=17;RA=0.556;PRIOR=false;SR=13;AF=0.000199681;AC=1	0.000199681	.	.	.	.	.	.
1	25309238	ALU	TSD=CAAACTGTGGGATTTTT;ASSESS=5;INTERNAL=NM_001127691,INTRONIC;SVTYPE=ALU;SVLEN=281;MEINFO=AluYa5,0,281,-;DIFF=1:t89c,c96a,c98t,g145a,c174t,g237c;LP=19;RP=16;RA=0.248;PRIOR=false;SR=21;AF=0.000213675;AC=1	0.000213675	.	.	.	.	.	.
1	25329237	LINE1	TSD=null;ASSESS=3;INTERNAL=RSRP1,INTRONIC;SVTYPE=LINE1;SVLEN=2317;MEINFO=L1Ambig,3701,6018,+;DIFF=0.03:n1-3700,n3777-6019;LP=1;RP=5;RA=-2.322;ISTP=0;PRIOR=false;SR=2;AF=0.0462331;AC=3617	.	.	.	.	.	.	0.0462331
1	25339359	SVA	TSD=AGCAGTTGGATTTTTGT;ASSESS=5;INTERNAL=NM_014313,INTRONIC;SVTYPE=SVA;SVLEN=194;MEINFO=SVA,1122,1316,-;DIFF=0.15:n1-1121,c1129g,c1157t,i1185aaggcc,g1268a,t1292c;LP=1;RP=15;RA=-3.907;PRIOR=false;SR=11;GENE=TMEM50A;AF=0.000199681;AC=1	0.000199681	.	.	.	.	.	.
1	25359547	SVA	TSD=AATCTCATAATGTTTT;ASSESS=5;INTERNAL=NM_014313,INTRONIC;SVTYPE=SVA;SVLEN=415;MEINFO=SVA,900,1315,-;DIFF=0.21:n1-899,t922g,a931g,a934t,g938a,c945a,g1009t,c1019t,a1053g,g1067a,a1079g,c1129g,c1157t,g1268a,t1292c;LP=15;RP=1;RA=3.907;PRIOR=false;SR=11;GENE=TMEM50A;AF=0.000199681;AC=1	0.000199681	.	.	.	.	.	.
1	25389656	ALU	TSD=AAAGCTCTTAGTC;ASSESS=5;INTERNAL=RHCE,INTRONIC;SVTYPE=ALU;SVLEN=281;MEINFO=AluYb8,0,281,+;DIFF=1:c57t,c64t,c98a,t144c,g211a,c236t,c248g,i252gcagtcc,g253a,a252g;LP=15;RP=23;RA=-0.617;PRIOR=false;SR=19;AF=0.000150105;AC=1	.	.	.	0.000150105	.	.	.
1	25429243	ALU	TSD=TTTTTTTTTTTTTTTTTTTTTT;ASSESS=5;INTERNAL=NM_001282564,PROMOTER;SVTYPE=ALU;SVLEN=279;MEINFO=AluY,1,280,+;DIFF=0.92:c4t,g5a,c8t,g9a,g11a,c18t,c48t,c83t,c92a,c98t,g99a,g110a,c142t,g151a,c154t,c174t,g196c,g199t,c206t,g269a;LP=18;RP=81;RA=-2.17;PRIOR=false;SR=58;AF=0.0373403;AC=187	0.0373403	.	.	.	.	.	.
1	25452689	ALU	TSD=AAATAATATTAC;ASSESS=5;INTERNAL=NM_001282564,INTRONIC;SVTYPE=ALU;SVLEN=279;MEINFO=AluSg,1,280,-;DIFF=1:c4t,d65-66,i129a,g144a,c153g,a163g,c197g,c207t,g215a,c239t,g240a,c244t,c277t;LP=28;RP=18;RA=0.637;PRIOR=false;SR=3;AF=0.000868056;AC=1	.	.	.	.	.	0.000868056	.
1	25457441	ALU	TSD=AAAATATATATTCTC;ASSESS=5;INTERNAL=NM_001282564,INTRONIC;SVTYPE=ALU;SVLEN=244;MEINFO=AluYb8,37,281,+;DIFF=0.96:g21a,t24a,c57t,c64t,c98a,t144c,g211a,c236t,i252gcagtcc,g261a,c248g,a252g;LP=46;RP=35;RA=0.394;PRIOR=false;SR=34;AF=0.00139776;AC=7	0.00139776	.	.	0.00375263	.	.	.
1	25462796	ALU	TSD=null;ASSESS=4;INTERNAL=TMEM57,INTRONIC;SVTYPE=ALU;SVLEN=279;MEINFO=AluY,1,280,-;DIFF=0.74:c4t,c10t,c57t,g91a,c98t,t101c,c106t,g110a,c138t,c142t,g196t,g199t,c206t,g212t,c213t,g217a,g228a,c230a,g231a,c238t,g239a,c243t,g261a,t274c;LP=1;RP=6;RA=-2.585;PRIOR=false;SR=8;AF=0.00870609;AC=58	.	.	.	0.00870609	.	.	.
1	25480955	ALU	TSD=ATATAT;ASSESS=5;INTERNAL=TMEM57,INTRONIC;SVTYPE=ALU;SVLEN=221;MEINFO=AluY,59,280,+;DIFF=0.43:c83t,c98t,g102a,c109t,c138t,c150t,g155a,g162a,g196t,g199t,g207a;LP=3;RP=5;RA=-0.737;PRIOR=false;SR=6;AF=0.197598;AC=1316	.	.	.	0.197598	.	.	.
1	25588105	ALU	TSD=AAGAGTCATCACC;ASSESS=5;INTERNAL=null,null;SVTYPE=ALU;SVLEN=281;MEINFO=AluYa4_5,0,281,+;DIFF=1:t89c,c96a,g145a,c174t,c236t;LP=138;RP=112;RA=0.301;PRIOR=false;SR=78;AF=0.0100287;AC=14;GENE=LDLRAP1	0.00678914	0.0100287	.	0.0189132	.	0.00347222	.
1	25588105	HERVK	TSD=AAGAGTCATCACC;ASSESS=5;INTERNAL=null,null;SVTYPE=HERVK;SVLEN=8656;MEINFO=HERVK,102,8758,+;DIFF=0:n1-101,n134-8759;LP=2;RP=62;RA=-4.954;PRIOR=false;SR=11;AF=0.00286533;AC=4;GENE=LDLRAP1	0.00199681	0.00286533	.	0.0090063	.	.	.
1	25588105	SVA	TSD=AAGAGTCATCACC;ASSESS=5;INTERNAL=null,null;SVTYPE=SVA;SVLEN=269;MEINFO=SVA,1046,1315,+;DIFF=0.11:n1-1045,a1053g,c1056a,g1067a,a1079g,g1082t,a1088g,g1094a,g1107a,c1119t,a1185g,t1197a,a1213g,n1218-1316;LP=89;RP=15;RA=2.569;PRIOR=false;SR=39;AF=0.00358166;AC=5;GENE=LDLRAP1	0.00299521	0.00358166	.	0.00975683	.	.	.
1	25633549	ALU	TSD=null;ASSESS=4;INTERNAL=NM_001289010,INTRONIC;SVTYPE=ALU;SVLEN=279;MEINFO=AluSz,1,280,+;DIFF=0.94:c8a,g11a,c53t,c57t,d64-65,g81a,i129a,c143t,c153g,a163g,g219c,g262a,c269t,g278a;LP=25;RP=51;RA=-1.029;PRIOR=false;SR=12;AF=0.0112847;AC=13	.	.	.	.	.	0.0112847	.
1	25637915	SVA	TSD=CCATCCTTTTTTTTTTT;ASSESS=5;INTERNAL=NM_001289010,INTRONIC;SVTYPE=SVA;SVLEN=1240;MEINFO=SVA,75,1315,-;DIFF=0.3:n1-1001,g1009t,c1019t,a1053g,g1067a,a1079g,c1129g,c1157t,i1185aaggcc,g1268a,t1292c;LP=9;RP=3;RA=1.585;PRIOR=false;SR=5;GENE=MAN1C1;AF=0.000199681;AC=1	0.000199681	.	.	.	.	.	.
1	25688021	ALU	TSD=AAAGAATGTTTTA;ASSESS=5;INTERNAL=NM_001289010,INTRONIC;SVTYPE=ALU;SVLEN=281;MEINFO=AluYc1,0,281,+;DIFF=1:c87t,g148a;LP=11;RP=7;RA=0.652;PRIOR=false;SR=15;AF=0.000716332;AC=1;GENE=MAN1C1	0.000199681	0.000716332	.	.	.	.	.
1	25785943	ALU	TSD=null;ASSESS=4;INTERNAL=NM_001289010,3_UTR;SVTYPE=ALU;SVLEN=279;MEINFO=AluY,1,280,+;DIFF=0.95:c48t,t93c,c98t,c154t,g175a,g199t,c254t,g261a;LP=31;RP=31;RA=0;PRIOR=false;SR=27;AF=0.0138889;AC=16	.	.	.	.	.	0.0138889	.
1	25834634	LINE1	TSD=AAAAAAAAAAAAAAAAA;ASSESS=5;INTERNAL=AUNIP,3_UTR;SVTYPE=LINE1;SVLEN=4935;MEINFO=L1Ta,1083,6018,+;DIFF=0.06:n1-5562,c5590t,n5639-5706,a5712g,c5744t,a5763g,n5780-5887,n5964-6019;LP=7;RP=9;RA=-0.363;ISTP=0;PRIOR=false;SR=11;AF=0.00188375;AC=187	.	.	.	.	.	.	0.00188375
1	25842756	ALU	TSD=AAGAATTATGCTATATC;ASSESS=5;INTERNAL=AUNIP,INTRONIC;SVTYPE=ALU;SVLEN=269;MEINFO=AluYa5,12,281,+;DIFF=1:c62t,t89c,c96a,g145a,c174t,a188g,g237c;LP=35;RP=49;RA=-0.485;PRIOR=false;SR=39;AF=0.00030021;AC=2	.	.	.	0.00030021	.	.	.
1	25843616	ALU	TSD=null;ASSESS=1;INTERNAL=AUNIP,INTRONIC;SVTYPE=ALU;SVLEN=279;MEINFO=AluY,1,280,-;DIFF=0.93:g11a,g21a,c57t,c98t,g99a,c107a,t134c,g143a,g151a,g159a,g162a,g175a,g196c,g199t,c218g,c236t,c260t,g277a;LP=6;RP=5;RA=0.263;PRIOR=false;SR=0;AF=0.00105074;AC=7	.	.	.	0.00105074	.	.	.
1	25877635	ALU	TSD=AAAAAAAAAAAA;ASSESS=5;INTERNAL=NM_001145454,TERMINATOR;SVTYPE=ALU;SVLEN=279;MEINFO=AluSg,1,280,+;DIFF=1:c8t,c10t,g49a,g58a,d65-66,i129a,c155t,g208a,c237t,c261t;LP=21;RP=26;RA=-0.308;PRIOR=false;SR=7;AF=0.000868056;AC=1	.	.	.	.	.	0.000868056	.
1	25901139	ALU	TSD=AAAAAAAAAAAAAAAAAAAAAA;ASSESS=5;INTERNAL=STMN1,INTRONIC;SVTYPE=ALU;SVLEN=271;MEINFO=AluSz,10,281,+;DIFF=0.53:g5a,g49a,c53t,c57t,c64t,g81a,g88t,c95t,c111t,i129a,c153t,g169a,c231t,g232t,a233t,c237a,c239t,d269-282;LP=58;RP=31;RA=0.904;PRIOR=false;SR=105;AF=0.0147577;AC=1465	.	.	.	.	.	.	0.0147577
1	25902107	ALU	TSD=TAAATAACACCAA;ASSESS=5;INTERNAL=NM_203399,INTRONIC;SVTYPE=ALU;SVLEN=281;MEINFO=AluYa5,0,281,+;DIFF=0.88:g9a,t89c,c96a,g145a,g148t,c174t,g237c,d281;LP=1177;RP=1114;RA=0.079;PRIOR=false;SR=1655;AF=0.0744986;AC=104;GENE=STMN1	0.0553115	0.0744986	.	0.181627	0.015873	0.0182292	.
1	25932638	ALU	TSD=AATTAGAGCTACTGT;ASSESS=5;INTERNAL=null,null;SVTYPE=ALU;SVLEN=280;MEINFO=AluYa4_5,1,281,+;DIFF=1:t89c,c96a,g145a,c174t,c236t;LP=12;RP=14;RA=-0.222;PRIOR=false;SR=9;AF=0.000716332;AC=1	0.000199681	0.000716332	.	.	.	.	.
1	25967434	ALU	TSD=null;ASSESS=4;INTERNAL=PAFAH2,INTRONIC;SVTYPE=ALU;SVLEN=278;MEINFO=AluY,3,281,+;DIFF=0.94:c8t,c150t,c206t,c254t,c268t,t274g,i127a;LP=16;RP=36;RA=-1.17;PRIOR=false;SR=8;AF=0.000150105;AC=1	.	.	.	0.000150105	.	.	.
1	26072091	ALU	TSD=dTTGTTGTTG;ASSESS=5;INTERNAL=TRIM63,PROMOTER;SVTYPE=ALU;SVLEN=278;MEINFO=AluY,2,280,+;DIFF=0.58:c4t,g11a,g54a,g65a,g79a,g81a,g91a,c98t,g102a,c108a,g110a,c138t,g139a,g143a,g153t,g162a,c172t,c213t;LP=22;RP=123;RA=-2.483;PRIOR=false;SR=34;AF=0.00060042;AC=4	.	.	0.00044964	0.00060042	.	.	.
1	26196161	ALU	TSD=null;ASSESS=4;INTERNAL=NM_198137,INTRONIC;SVTYPE=ALU;SVLEN=279;MEINFO=AluY,1,280,+;DIFF=1:g11a,c138t,g139a,c154t,g196t,g199t,g207a,g214a,c218g,g239a,c243t,g261a,g271a,c275a,c276t;LP=64;RP=61;RA=0.069;PRIOR=false;SR=16;AF=0.00429799;AC=6;GENE=CATSPER4	.	0.00429799	0.00314748	0.0373762	.	0.0190972	.
1	26196732	SVA	TSD=null;ASSESS=3;INTERNAL=CATSPER4,INTRONIC;SVTYPE=SVA;SVLEN=247;MEINFO=SVA,1068,1315,+;DIFF=0.19:n1-1067,a1079g,c1129g,c1146a,c1163a,c1164t,t1267c,g1268a,g1310t;LP=1;RP=8;RA=-3;PRIOR=false;SR=3;AF=0.000150105;AC=1	.	.	.	0.000150105	.	.	.
1	26269752	LINE1	TSD=null;ASSESS=3;INTERNAL=CEP85,INTRONIC;SVTYPE=LINE1;SVLEN=4006;MEINFO=L1Ambig,2012,6018,-;DIFF=0.04:n1-5422,n5499-5550,g5586a,t5593c,n5627-6019;LP=8;RP=5;RA=0.678;ISTP=-1;PRIOR=false;SR=1;AF=0.00551999;AC=507	.	.	.	.	.	.	0.00551999
1	26274598	SVA	TSD=null;ASSESS=3;INTERNAL=NM_001281518,INTRONIC;SVTYPE=SVA;SVLEN=146;MEINFO=SVA,1169,1315,+;DIFF=0.09:n1-1168,a1178g,g1268a,t1292c;LP=1;RP=8;RA=-3;PRIOR=false;SR=1;AF=0.000716332;AC=1;GENE=CEP85	.	0.000716332	.	.	.	.	.
1	26317695	ALU	TSD=AAACCAGGATTCA;ASSESS=5;INTERNAL=NM_145345,INTRONIC;SVTYPE=ALU;SVLEN=241;MEINFO=AluY,40,281,+;DIFF=0.9:c64t,c98t,g196c,g199t,g211a,c213t,c236t,c246t;LP=26;RP=38;RA=-0.547;PRIOR=false;SR=10;AF=0.000199681;AC=1	0.000199681	.	.	.	.	.	.
1	26334422	SVA	TSD=AAAGTGAGACCCTGTCT;ASSESS=5;INTERNAL=AIM1L,INTRONIC;SVTYPE=SVA;SVLEN=536;MEINFO=SVA,780,1316,-;DIFF=0.41:n1-432,c438t,i478gt,t478c,c479a,a480g,g481c,a487c,a513g,a561c,t564c,a578g,t580c,t582c,g602t,g603t,c621t,g652t,a653g,a668g,c679t,c728t,t729c,g743t,g748c,t753c,n756,a768t,n769,t770c,a773g,a775g,a782g,c785g,g795a,n801-801,g840c,t847g,t862c,n867-880,n882,n885,n888,t889c,n890-890,n892-893,n910,g…	.	.	.	0.000450315	.	.	.
1	26399819	ALU	TSD=null;ASSESS=3;INTERNAL=null,null;SVTYPE=ALU;SVLEN=279;MEINFO=AluSg,1,280,-;DIFF=0:g11a,g58a,d65-66,g70c,g83t,c111a,i129a,a163g,c165t,c207t,c231t,g238a,g240a,g262a,c269t,d277-282;LP=432;RP=222;RA=0.96;PRIOR=false;SR=9;AF=0.000199681;AC=1	0.000199681	.	.	.	.	.	.
1	26434146	ALU	TSD=GCAGTTCTT;ASSESS=5;INTERNAL=DHDDS,INTRONIC;SVTYPE=ALU;SVLEN=280;MEINFO=AluYa4_5,1,281,-;DIFF=1:t89c,c96a,g145a,c174t,c238t;LP=40;RP=49;RA=-0.293;PRIOR=false;SR=42;AF=0.00060042;AC=4	.	.	.	0.00060042	.	.	.
1	26513173	SVA	TSD=null;ASSESS=3;INTERNAL=null,null;SVTYPE=SVA;SVLEN=1240;MEINFO=SVA,75,1315,+;DIFF=0.35:n1-74,a78c,t100a,t152c,c158t,c161t,g183a,g192c,t193c,t202g,g241c,g242a,c249t,c253t,t269c,g271t,c276t,c277g,n284-436,n444-445,n450-451,n456-457,n466,a487c,a513g,g523t,n544-668,a692c,g713t,t729c,g730a,c733t,g748a,c750t,c757g,g764c,a773g,n799,c801g,n805-904,c920g,t922g,a931g,a934t,g938a,c945a,g1009t,c1019t,a105…	0.000399361	0.00143266	.	.	.	.	.
1	26561330	ALU	TSD=TCTGAGGACCTTCTT;ASSESS=5;INTERNAL=NM_001006665,INTRONIC;SVTYPE=ALU;SVLEN=280;MEINFO=AluYb8,1,281,-;DIFF=1:c57t,c64t,c98a,t144c,g211a,c236t,i252gcagtcc,c248g,a252g;LP=34;RP=33;RA=0.043;PRIOR=false;SR=37;AF=0.00143266;AC=2;GENE=RPS6KA1	0.000798722	0.00143266	.	0.00210147	.	.	5.2993e-05
1	26568130	ALU	TSD=AAAAACACTGGG;ASSESS=5;INTERNAL=NM_001006665,INTRONIC;SVTYPE=ALU;SVLEN=281;MEINFO=AluYa3_4,0,281,+;DIFF=0.91:c10t,c57t,g145a,c174t,g207a,g214a,g237c;LP=67;RP=73;RA=-0.124;PRIOR=false;SR=23;AF=0.000399361;AC=2	0.000399361	.	.	.	.	.	.
1	26579154	SVA	TSD=null;ASSESS=3;INTERNAL=MIR1976,TERMINATOR;SVTYPE=SVA;SVLEN=1234;MEINFO=SVA,81,1315,+;DIFF=0.21:n1-970,g1009t,a1053g,g1067a,a1079g,c1129g,c1146a,c1163a,c1164t,t1267c,g1268a,g1310t;LP=4;RP=12;RA=-1.585;PRIOR=false;SR=5;AF=0.000150105;AC=1	.	.	.	0.000150105	.	.	.
1	26593938	ALU	TSD=TTTTTTTTTTTTTTTTTTTT;ASSESS=5;INTERNAL=MIR1976,TERMINATOR;SVTYPE=ALU;SVLEN=278;MEINFO=AluSz,2,280,+;DIFF=0.51:g9a,g54a,g58a,t65g,t78a,g81a,g88t,g104a,g112a,d134-282;LP=32;RP=51;RA=-0.672;PRIOR=false;SR=13;AF=0.00105074;AC=7	.	.	.	0.00105074	.	.	.
1	26605545	SVA	TSD=null;ASSESS=4;INTERNAL=null,null;SVTYPE=SVA;SVLEN=1240;MEINFO=SVA,75,1315,-;DIFF=0.25:n1-872,g880c,g938a,c945a,t970c,n977,t985c,g1009t,a1053g,g1067a,a1079g,c1129g,c1146a,c1163a,c1164t,t1267c,g1268a,g1310t;LP=18;RP=1;RA=4.17;PRIOR=false;SR=9;AF=0.000199681;AC=1	0.000199681	.	.	.	.	.	.
1	26609668	ALU	TSD=TTTTTTTTTTTTTTTTTTTTTTTT;ASSESS=5;INTERNAL=null,null;SVTYPE=ALU;SVLEN=279;MEINFO=AluSz,1,280,+;DIFF=0.91:g5a,g9a,g54a,c57t,t65g,g112a,i129a,c139t,g144a,g146a,c151t,c153g,g156a,c197t,c214t,g232a,a265c,d272-282;LP=47;RP=79;RA=-0.749;PRIOR=false;SR=14;AF=0.0078125;AC=9	0.00499201	.	.	.	.	0.0078125	.
1	26662716	ALU	TSD=null;ASSESS=4;INTERNAL=null,null;SVTYPE=ALU;SVLEN=279;MEINFO=AluY,1,280,-;DIFF=1:g5a,c57t,c64t,t86g,c98t,c218g,c268t,g269a;LP=35;RP=17;RA=1.042;PRIOR=false;SR=14;AF=0.0434028;AC=50	.	.	.	.	.	0.0434028	.
1	26709647	ALU	TSD=null;ASSESS=4;INTERNAL=NM_139135,INTRONIC;SVTYPE=ALU;SVLEN=279;MEINFO=AluY,1,280,-;DIFF=1:c10t,g54a,c57t,g79a,c98t,g155a,g199t,g231a,c268a,c273a,c276a;LP=20;RP=32;RA=-0.678;PRIOR=false;SR=13;AF=0.00143266;AC=2;GENE=ARID1A	.	0.00143266	.	.	.	0.00954861	.
1	26743803	ALU	TSD=AAAAAAAAAAAAAAAAAA;ASSESS=5;INTERNAL=NM_139135,INTRONIC;SVTYPE=ALU;SVLEN=279;MEINFO=AluSg,1,280,+;DIFF=0.98:g5a,c8t,g11a,d65-66,c95t,i129a,c139t,g152a,c155t,a163g,c175t,c207t,g215a,c231t,a235g,c269t,g278a;LP=47;RP=101;RA=-1.104;PRIOR=false;SR=29;AF=0.000868056;AC=1	.	.	.	.	.	0.000868056	.
1	26814646	ALU	TSD=ACAAGATAAATTTCT;ASSESS=5;INTERNAL=null,null;SVTYPE=ALU;SVLEN=279;MEINFO=AluYc1,2,281,-;DIFF=0.97:g148a,c206t;LP=32;RP=41;RA=-0.358;PRIOR=false;SR=25;AF=0.00143266;AC=2	0.00219649	0.00143266	.	.	.	0.00173611	.
1	26841296	SVA	TSD=CACATCCAGCTAATTTTT;ASSESS=5;INTERNAL=NM_032283,INTRONIC;SVTYPE=SVA;SVLEN=856;MEINFO=SVA,460,1316,-;DIFF=0.29:n1-410,g444a,g477a,a487c,c491t,c507t,a513g,a561c,t564c,c569t,n578-586,n589-590,n593-594,t597g,n604-605,n607,n623,n625,c626g,n631-631,t633g,n634,c635g,n639-639,n643,n646,a653g,a668g,g669a,g702a,c716t,t729c,c732t,g746a,c747g,n753-1079,c1129g,c1157t,g1268a,t1292c,n1308;LP=3;RP=9;RA=-1.585…	0.000199681	.	.	.	.	.	.
1	26862673	ALU	TSD=GAAAGTGCTTGGGAA;ASSESS=5;INTERNAL=NM_006142,PROMOTER;SVTYPE=ALU;SVLEN=281;MEINFO=AluYb7_3,0,281,+;DIFF=1:c22a,c57t,c98a,c142t,t144c,g207a,g211a,c236t,c243t,i252gcagtcc,g261a,c248g,a252g;LP=56;RP=36;RA=0.637;PRIOR=false;SR=56;AF=0.000798722;AC=4	0.000798722	.	.	.	.	.	.
1	26877683	ALU	TSD=CCCATCCTGTCTATCTCT;ASSESS=5;INTERNAL=GPN2,TERMINATOR;SVTYPE=ALU;SVLEN=278;MEINFO=AluYa5,3,281,-;DIFF=0.99:t89c,c96a,a123c,g145a,c166t,c174t,g237c;LP=102;RP=68;RA=0.585;PRIOR=false;SR=94;AF=0.00195137;AC=13	.	.	.	0.00195137	.	.	.
1	26893250	SVA	TSD=null;ASSESS=3;INTERNAL=GPATCH3,INTRONIC;SVTYPE=SVA;SVLEN=1267;MEINFO=SVA,48,1315,+;DIFF=0.25:n1-1017,a1053g,g1067a,a1079g,c1129g,c1146a,c1163a,c1164t,t1267c,g1268a,g1310t;LP=5;RP=8;RA=-0.678;PRIOR=false;SR=5;AF=0.000150105;AC=1	.	.	.	0.000150105	.	.	.
1	26893548	LINE1	TSD=TTTTTTTTTTTTTTTTTTT;ASSESS=5;INTERNAL=GPATCH3,INTRONIC;SVTYPE=LINE1;SVLEN=4778;MEINFO=L1Ambig,1240,6018,+;DIFF=0.01:n1-1239,c1297t,n1316-6019;LP=1;RP=5;RA=-2.322;ISTP=0;PRIOR=false;SR=3;AF=0.0149793;AC=1471	.	.	.	.	.	.	0.0149793
1	26904049	ALU	TSD=TAAATAAATAAATA;ASSESS=5;INTERNAL=NM_022078,PROMOTER;SVTYPE=ALU;SVLEN=280;MEINFO=AluYa1_1,1,281,+;DIFF=1:d85-95,t144c,g145a,g209a,c230g,t244a,g267a,a252c,i127a;LP=31;RP=59;RA=-0.928;PRIOR=false;SR=23;AF=0.132521;AC=185	0.115216	0.132521	0.217176	0.0887121	.	.	.
1	26905671	SVA	TSD=null;ASSESS=4;INTERNAL=NM_022078,PROMOTER;SVTYPE=SVA;SVLEN=434;MEINFO=SVA,881,1315,-;DIFF=0.33:n1-880,n883,g910c,g938a,c945a,t970c,t985c,g1009t,a1053g,g1067a,a1079g,c1129g,c1146a,c1163a,c1164t,t1267c,g1268a,g1310t;LP=281;RP=6;RA=5.549;PRIOR=false;SR=102;AF=0.012894;AC=18	0.0197684	0.012894	.	.	.	.	.
1	26939879	SVA	TSD=CCTCACTAGGCTCTT;ASSESS=5;INTERNAL=NM_006600,INTRONIC;SVTYPE=SVA;SVLEN=1269;MEINFO=SVA,47,1316,-;DIFF=0.46:n1-74,a78c,t152c,c158t,a167g,g192c,t193c,c201t,t202g,c205t,n211,g219a,t221a,g225a,a231g,c232t,n251,n253,n255,t258g,n259-260,n265,n269,n271,n273,n278,n281,n288,n297,n308,n310,t314c,a319g,t324c,a327g,n330,c346t,c350t,g362a,n366-670,n674,g676a,n680,n688,n692,n701,c716t,n729,n758-809,g840t,t8…	0.000199681	0.000716332	.	.	.	.	.
1	27009008	ALU	TSD=TTTTTTTTTTTTTTTTTTTTTTTTTTTTTTT;ASSESS=5;INTERNAL=NM_052943,INTRONIC;SVTYPE=ALU;SVLEN=279;MEINFO=AluSz,1,280,-;DIFF=0.99:g5a,g7a,g9a,c48t,g54a,c57a,t65g,g88t,g112a,i129a,c139t,g144a,g152a,a163g,g176a,c197g,g198a,g208a,g213a,g219c,g232a,g262a,c269t;LP=31;RP=31;RA=0;PRIOR=false;SR=15;AF=0.0078125;AC=9	.	.	.	.	.	0.0078125	.
1	27029183	SVA	TSD=null;ASSESS=4;INTERNAL=null,null;SVTYPE=SVA;SVLEN=1240;MEINFO=SVA,75,1315,-;DIFF=0.41:n1-856,t862c,n870,g880c,n883,n886,n888,n890,n893,n900,n908,g938a,c945a,t970c,t985c,g1009t,a1053g,g1067a,a1079g,c1129g,d1132,n1134,c1146a,c1163a,c1164t,t1267c,g1268a,g1310t;LP=18;RP=17;RA=0.082;PRIOR=false;SR=8;AF=0.000199681;AC=1	0.000199681	.	.	0.00030021	.	.	.
1	27039125	ALU	TSD=GGGTAGCAGCTTCTT;ASSESS=5;INTERNAL=FAM46B,PROMOTER;SVTYPE=ALU;SVLEN=280;MEINFO=AluYc1,1,281,-;DIFF=1:g148a;LP=12;RP=12;RA=0;PRIOR=false;SR=5;AF=0.000150105;AC=1	.	.	.	0.000150105	.	.	.
1	27043016	ALU	TSD=null;ASSESS=4;INTERNAL=null,null;SVTYPE=ALU;SVLEN=279;MEINFO=AluY,1,280,-;DIFF=0.93:c48t,c98t,c138t,c154t,g199a,c206t,c213t,g231a,c243t,c250a,g253a,g257t,g261a;LP=59;RP=50;RA=0.239;PRIOR=false;SR=7;AF=0.0260417;AC=30	0.000199681	.	.	.	.	0.0260417	.
1	27097823	SVA	TSD=CATATTTTATTTTTTTT;ASSESS=5;INTERNAL=NM_003047,TERMINATOR;SVTYPE=SVA;SVLEN=1312;MEINFO=SVA,4,1316,-;DIFF=0.29:n1-912,c920t,t922g,a931g,a934t,g938a,c945a,g1009t,c1019t,a1041g,a1053g,g1067a,a1068g,a1079g,a1102g,a1116g,c1129g,a1132g,c1157t,a1178g,g1268a,t1292c;LP=30;RP=1;RA=4.907;PRIOR=false;SR=20;AF=0.000399361;AC=2	0.000399361	.	.	.	.	.	.
1	27099519	SVA	TSD=null;ASSESS=3;INTERNAL=SLC9A1,3_UTR;SVTYPE=SVA;SVLEN=1240;MEINFO=SVA,75,1315,+;DIFF=0.38:n1-1017,a1053g,g1067a,a1079g,t1124c,c1129g,c1146a,c1163a,c1164t,t1267c,g1268a,g1310t;LP=23;RP=11;RA=1.064;PRIOR=false;SR=4;AF=0.00030021;AC=2	.	.	.	0.00030021	.	.	.
1	27135506	ALU	TSD=dATTTCTTCCTTTTTTCTGG;ASSESS=5;INTERNAL=NM_003047,INTRONIC;SVTYPE=ALU;SVLEN=279;MEINFO=AluSg,1,280,-;DIFF=1:c10t,g54a,g58a,d65-66,c80t,g102a,c111t,i129a,g140a,c143t,c153g,c155t,c197t,g219c;LP=15;RP=21;RA=-0.485;PRIOR=false;SR=8;AF=0.00694444;AC=8	.	.	.	.	.	0.00694444	.
1	27135525	ALU	TSD=null;ASSESS=3;INTERNAL=SLC9A1,INTRONIC;SVTYPE=ALU;SVLEN=279;MEINFO=AluY,1,280,+;DIFF=0:c4t,g11a,g65a,c107t,c109t,a119g,t124c,g139a,c150t,g155a,c174t;LP=5;RP=2;RA=1.322;PRIOR=false;SR=5;AF=0.00210147;AC=14	.	.	.	0.00210147	.	.	.
1	27163186	ALU	TSD=TTTTTTTTTTTTTTTTTTTTTT;ASSESS=5;INTERNAL=NM_003047,PROMOTER;SVTYPE=ALU;SVLEN=279;MEINFO=AluY,1,280,+;DIFF=0.92:c8t,c20t,a76t,t93c,c98t,c138t,g151a,c154t,c174t,g207a,g214a,c218g,g231a,g237a,c260t,a262t,c268t;LP=80;RP=105;RA=-0.392;PRIOR=false;SR=13;AF=0.0121528;AC=14	.	.	.	.	.	0.0121528	.
1	27164398	ALU	TSD=TTATATTTACTTTC;ASSESS=5;INTERNAL=SLC9A1,PROMOTER;SVTYPE=ALU;SVLEN=276;MEINFO=AluYb10,5,281,-;DIFF=1:c57t,c64t,c98a,t144c,c174g,g211a,c236t,i252gcagtcc,c248g;LP=228;RP=188;RA=0.278;PRIOR=false;SR=291;AF=0.0126088;AC=84	.	.	.	0.0126088	.	.	.
1	27165822	ALU	TSD=AAAAAAAAAAAAAAAAAAAAAAAAAAA;ASSESS=5;INTERNAL=null,null;SVTYPE=ALU;SVLEN=279;MEINFO=AluYb,1,280,+;DIFF=1:i65gt,t86g,t93c,c98t,t144c,c174g,g211a,c236t,i252gcagtcc,c248g;LP=35;RP=155;RA=-2.147;PRIOR=false;SR=102;AF=0.186963;AC=261	0.179912	0.186963	0.0998201	.	.	.	.
1	27184396	ALU	TSD=AGAAAATTGT;ASSESS=5;INTERNAL=null,null;SVTYPE=ALU;SVLEN=279;MEINFO=AluY,1,280,-;DIFF=1:c236t,c260t;LP=57;RP=61;RA=-0.098;PRIOR=false;SR=8;AF=0.000199681;AC=1	0.000199681	.	.	.	.	.	.
1	27185414	SVA	TSD=null;ASSESS=4;INTERNAL=null,null;SVTYPE=SVA;SVLEN=1240;MEINFO=SVA,75,1315,-;DIFF=0.33:n1-815,a825g,a827g,a836g,a838g,g840t,g880c,a886g,g898a,c920g,t922g,a931g,a934t,g938a,c945a,g1009t,c1019t,a1053g,g1067a,a1079g,c1129g,c1157t,g1268a,t1292c;LP=18;RP=1;RA=4.17;PRIOR=false;SR=5;AF=0.00143266;AC=2	0.000798722	0.00143266	.	.	.	.	.
1	27189362	ALU	TSD=TTTTCTTTTTTTTCTTTTCTTTTC;ASSESS=5;INTERNAL=null,null;SVTYPE=ALU;SVLEN=279;MEINFO=AluSz,1,280,-;DIFF=0.88:g7c,c10t,g21a,t65g,i129a,c153g,a163g,g198a,g208a,g209a,g213a,c214t,g215a,c231t,g232a,g238a,c239t,g240a,c244t,c261t,d267-282;LP=17;RP=19;RA=-0.16;PRIOR=false;SR=24;AF=0.00347222;AC=4	.	.	.	.	.	0.00347222	.
1	27192375	SVA	TSD=null;ASSESS=3;INTERNAL=SLC9A1,PROMOTER;SVTYPE=SVA;SVLEN=1240;MEINFO=SVA,75,1315,+;DIFF=0.2:n1-1084,n1089,n1092,t1098a,g1099a,g1110a,g1118a,c1129g,c1146a,t1161a,c1163a,c1164t,t1267c,g1268a,g1310t;LP=2;RP=10;RA=-2.322;PRIOR=false;SR=4;AF=0.00030021;AC=2	.	.	.	0.00030021	.	.	.
1	27214169	SVA	TSD=null;ASSESS=3;INTERNAL=WDTC1,PROMOTER;SVTYPE=SVA;SVLEN=1220;MEINFO=SVA,95,1315,-;DIFF=0.34:n1-1021,a1053g,g1067a,a1079g,c1129g,c1146a,c1163a,c1164t,t1267c,g1268a,g1310t;LP=133;RP=157;RA=-0.239;PRIOR=false;SR=67;AF=0.00210147;AC=14	.	.	.	0.00210147	.	.	.
1	27221154	ALU	TSD=null;ASSESS=3;INTERNAL=null,null;SVTYPE=ALU;SVLEN=251;MEINFO=AluY,30,281,+;DIFF=0.98:g9a,c10a,c53t,g58a,c98t,g110a;LP=60;RP=67;RA=-0.159;PRIOR=false;SR=15;AF=0.0164931;AC=19	.	.	.	0.000750525	.	0.0164931	.
1	27233385	ALU	TSD=AAAAAAAAAAAAAAAAAAAAAAAAAAAA;ASSESS=5;INTERNAL=NM_015023,PROMOTER;SVTYPE=ALU;SVLEN=279;MEINFO=AluSg,1,280,+;DIFF=1:c48a,d65-66,g81a,g112a,i129a,g144a,c151t,c153g,a163g,g176a,c197g,g213a,g215a,g232a,g270a,g278a;LP=9;RP=40;RA=-2.152;PRIOR=false;SR=79;AF=0.200573;AC=280;GENE=LOC105376890	0.214856	0.200573	0.0116906	0.145452	.	0.0452174	.
1	27253711	SVA	TSD=null;ASSESS=4;INTERNAL=NM_015023,INTRONIC;SVTYPE=SVA;SVLEN=450;MEINFO=SVA,865,1315,-;DIFF=0.3:n1-864,g878a,g914a,c920t,g938a,c945a,g1009t,g1010a,a1053g,g1067a,a1079g,c1129g,a1175c,d1179,n1198,g1268a,t1292c;LP=16;RP=1;RA=4;PRIOR=false;SR=9;AF=0.000716332;AC=1;GENE=WDTC1	0.000199681	0.000716332	.	.	.	.	.
1	27372794	LINE1	TSD=TTTTTTTTTTTTTTTTTTTTT;ASSESS=5;INTERNAL=FCN3,INTRONIC;SVTYPE=LINE1;SVLEN=1009;MEINFO=L1Ambig,5009,6018,+;DIFF=0.01:n1-5008,n5023,n5044-5045,n5059,n5069,n5105,t5106a,g5132t,n5160-5415,n5425,n5443,t5455a,a5501g,c5507a,c5512a,t5535g,g5538t,n5564-6019;LP=1;RP=3;RA=-1.585;ISTP=0;PRIOR=false;SR=4;GENE=FCN3;AF=0.195144;AC=434	.	.	0.195144	.	.	.	.
1	27409456	LINE1	TSD=null;ASSESS=4;INTERNAL=WASF2,INTRONIC;SVTYPE=LINE1;SVLEN=5305;MEINFO=L1Ambig,713,6018,-;DIFF=0.06:n1-4645,t4657a,g4713a,g4716a,t4719c,n4726-4810,a4838g,c4840t,n4887-5039,c5093a,a5103c,n5116-5224,a5242g,a5256c,a5258g,c5260t,g5268a,t5316a,n5324-6019;LP=7;RP=22;RA=-1.652;ISTP=0;PRIOR=false;SR=2;AF=0.0341058;AC=2911	.	.	.	.	.	.	0.0341058
1	27415728	SVA	TSD=null;ASSESS=3;INTERNAL=NM_001201404,INTRONIC;SVTYPE=SVA;SVLEN=1240;MEINFO=SVA,75,1315,-;DIFF=0.31:n1-849,t862c,g880c,n889,n931,g938a,c945a,t970c,t985c,g1009t,a1053g,g1067a,a1079g,c1129g,c1146a,c1163a,c1164t,t1267c,g1268a,g1310t;LP=2;RP=53;RA=-4.728;PRIOR=false;SR=22;GENE=WASF2;AF=0.000599042;AC=3	0.000599042	.	.	.	.	.	.
1	27437251	ALU	TSD=GAAAACTGTCTTTT;ASSESS=5;INTERNAL=WASF2,INTRONIC;SVTYPE=ALU;SVLEN=280;MEINFO=AluYi,1,281,-;DIFF=1:c23t,g146a,c236t,c238t,g261c,i127a;LP=8;RP=6;RA=0.415;PRIOR=false;SR=12;AF=0.000150105;AC=1	.	.	.	0.000150105	.	.	.
1	27462465	SVA	TSD=null;ASSESS=3;INTERNAL=NM_001201404,INTRONIC;SVTYPE=SVA;SVLEN=1240;MEINFO=SVA,75,1315,+;DIFF=0.23:n1-930,g938a,c945a,t970c,t985c,g1009t,a1053g,g1067a,a1079g,c1129g,c1146a,c1163a,c1164t,t1267c,g1268a,g1310t;LP=1;RP=15;RA=-3.907;PRIOR=false;SR=5;GENE=WASF2;AF=0.000199681;AC=1	0.000199681	.	.	.	.	.	.
1	27465059	ALU	TSD=AACAGCTTACTTTT;ASSESS=5;INTERNAL=WASF2,INTRONIC;SVTYPE=ALU;SVLEN=280;MEINFO=AluYa5,1,281,-;DIFF=1:c53t,t89c,c96a,g145a,c174t,g237c;LP=26;RP=29;RA=-0.158;PRIOR=false;SR=33;AF=0.00030021;AC=2	.	.	.	0.00030021	.	.	.
1	27478292	ALU	TSD=AAAAAAAAAAAAAAAAA;ASSESS=5;INTERNAL=NM_001201404,INTRONIC;SVTYPE=ALU;SVLEN=279;MEINFO=AluY,1,280,-;DIFF=0.98:g5a,g9a,g11a,c20t,g49a,c53t,c57t,c174t,g196t,g199t,g207a,c218g,c238t,g239a;LP=107;RP=68;RA=0.654;PRIOR=false;SR=31;AF=0.0894097;AC=103	.	.	.	.	.	0.0894097	.
1	27486136	SVA	TSD=null;ASSESS=4;INTERNAL=NM_001201404,INTRONIC;SVTYPE=SVA;SVLEN=1125;MEINFO=SVA,191,1316,+;DIFF=0.1:n1-152,c158t,a167g,g192c,t193c,c201t,t202g,c205t,d211,n212,a218g,g219a,t221a,g225a,a231g,c232t,t236c,i246cat,g250a,c253t,g254a,t258a,t269c,g271t,g274t,g278a,n285-1316;LP=5;RP=1;RA=2.322;PRIOR=false;SR=1;AF=0.000868056;AC=1	.	.	.	.	.	0.000868056	.
1	27514743	ALU	TSD=AAAACATTTAGATCTA;ASSESS=5;INTERNAL=null,null;SVTYPE=ALU;SVLEN=281;MEINFO=AluY,0,281,+;DIFF=1:t144a,c236t,d265;LP=19;RP=25;RA=-0.396;PRIOR=false;SR=13;AF=0.000199681;AC=1	0.000199681	.	.	.	.	.	.
1	27517314	ALU	TSD=AGAAGAGAAACTCA;ASSESS=5;INTERNAL=null,null;SVTYPE=ALU;SVLEN=281;MEINFO=AluYa1_2,0,281,+;DIFF=0.99:g5a,c174t,g237c;LP=47;RP=78;RA=-0.731;PRIOR=false;SR=9;AF=0.000199681;AC=1	0.000199681	.	.	.	.	.	.
1	27541026	ALU	TSD=AAAAAAAAAAAAAAAAAAAAAAAAA;ASSESS=5;INTERNAL=NM_001029882,INTRONIC;SVTYPE=ALU;SVLEN=279;MEINFO=AluY,1,280,-;DIFF=0.99:c4t,c8t,g11a,c20t,c48t,g54a,c57t,c98t,c150t,g155a,g212a,g231a,g237a,g239a,g269a;LP=37;RP=27;RA=0.455;PRIOR=false;SR=21;AF=0.0130208;AC=15	.	.	.	.	.	0.0130208	.
1	27557947	ALU	TSD=GAGTGCCCTGTACATTT;ASSESS=5;INTERNAL=NM_001029882,INTRONIC;SVTYPE=ALU;SVLEN=279;MEINFO=AluY,2,281,-;DIFF=1:c10t,g49c,g91a,c92t,g100a,g143a,g146a,c150t,c206t,c229t,c238t,i127a;LP=6;RP=16;RA=-1.415;PRIOR=false;SR=7;AF=0.000868056;AC=1	.	.	.	.	.	0.000868056	.
1	27567957	ALU	TSD=CAACTCCCTGCTCTT;ASSESS=5;INTERNAL=AHDC1,INTRONIC;SVTYPE=ALU;SVLEN=279;MEINFO=AluYa4_5,2,281,-;DIFF=1:t89c,c96a,g145a,c174t,g199a,c236t;LP=12;RP=10;RA=0.263;PRIOR=false;SR=17;AF=0.000150105;AC=1	.	.	.	0.000150105	.	.	.
1	27654945	ALU	TSD=TTTTTTTTTTT;ASSESS=5;INTERNAL=null,null;SVTYPE=ALU;SVLEN=279;MEINFO=AluY,1,280,-;DIFF=0.98:g54a,c57t,i65gt,t86g,c98t,c154t,g162a,g199t,c236t,g245a,g253a,g269a,g277a;LP=40;RP=93;RA=-1.217;PRIOR=false;SR=71;AF=0.0928819;AC=107	.	.	.	0.00390273	.	0.0928819	.
1	27682961	LINE1	TSD=AAAAGGGACAGGA;ASSESS=5;INTERNAL=IFI6,PROMOTER;SVTYPE=LINE1;SVLEN=141;MEINFO=L1Ta,5878,6019,+;DIFF=0.02:n1-5874,t5877g,n5878;LP=40;RP=32;RA=0.322;ISTP=0;PRIOR=false;SR=38;AF=0.000750525;AC=5	.	.	.	0.000750525	.	.	.
1	27698405	ALU	TSD=AAAATCTAGAT;ASSESS=5;INTERNAL=null,null;SVTYPE=ALU;SVLEN=281;MEINFO=AluYa4_3,0,281,+;DIFF=1:c57t,t89c,c96a,c174t,g199a,g237c;LP=57;RP=52;RA=0.132;PRIOR=false;SR=27;AF=0.00143266;AC=2	.	0.00143266	.	.	.	.	.
1	27708859	ALU	TSD=CCCAATGTATAGTTTTTT;ASSESS=5;INTERNAL=null,null;SVTYPE=ALU;SVLEN=278;MEINFO=AluYa5,3,281,-;DIFF=1:t89c,c96a,g145a,c174t,g237c,g269a;LP=33;RP=35;RA=-0.085;PRIOR=false;SR=16;AF=0.000199681;AC=1	0.000199681	.	.	.	.	.	.
1	27773857	ALU	TSD=TAGCCTTTAGGTTT;ASSESS=5;INTERNAL=STX12,INTRONIC;SVTYPE=ALU;SVLEN=280;MEINFO=AluYa1_1,1,281,-;DIFF=1:a28c,g145a;LP=11;RP=8;RA=0.459;PRIOR=false;SR=11;AF=0.000150105;AC=1	.	.	.	0.000150105	.	.	.
1	27774677	ALU	TSD=AAA;ASSESS=5;INTERNAL=NM_177424,INTRONIC;SVTYPE=ALU;SVLEN=279;MEINFO=AluY,1,280,-;DIFF=0.98:g54a,c57t,c98t,g196c,g199t,g207a,g214a,c238a,c260t,c268t,g269a;LP=55;RP=32;RA=0.781;PRIOR=false;SR=24;AF=0.00954861;AC=11	.	.	.	.	.	0.00954861	.
1	27783647	SVA	TSD=CACGCCCAGCTGAGTCCTAGTTTT;ASSESS=5;INTERNAL=STX12,INTRONIC;SVTYPE=SVA;SVLEN=1130;MEINFO=SVA,186,1316,-;DIFF=0.28:n1-153,c158t,t162c,a167g,g179a,a186g,t193c,t202c,d211,g213a,a218g,g225a,a231g,i246gac,c253t,t258g,g271t,g322a,t324c,a327g,c361t,t366c,c386t,a395g,t405c,g406c,c435t,g456a,n471,n487-612,n619,n621-622,n625-627,n635,n644-645,n651,a653g,n655,n658-659,c660t,a668g,g681a,n683-683,n687,n696,…	.	.	.	0.000150105	.	.	.
1	27802021	ALU	TSD=AAGAGATATAGGAGG;ASSESS=5;INTERNAL=NM_177424,INTRONIC;SVTYPE=ALU;SVLEN=281;MEINFO=AluY,0,281,+;DIFF=0.99:c98t,g214a;LP=26;RP=36;RA=-0.469;PRIOR=false;SR=8;AF=0.000199681;AC=1	0.000199681	.	.	.	.	.	.
1	27856092	ALU	TSD=TTTTTTTTTTTTTTTTTTTTTTTTTTTT;ASSESS=5;INTERNAL=null,null;SVTYPE=ALU;SVLEN=278;MEINFO=AluY,2,280,+;DIFF=1:c8g,g11c,g12a,g58a,a76t,c98t,g143a,g214a;LP=31;RP=59;RA=-0.928;PRIOR=false;SR=31;AF=0.00798722;AC=40	0.00798722	.	.	.	.	.	.
1	27857341	ALU	TSD=null;ASSESS=3;INTERNAL=THEMIS2,PROMOTER;SVTYPE=ALU;SVLEN=279;MEINFO=AluSg,1,280,+;DIFF=0.25:c4t,g9a,c10t,g21a,c48t,c53t,g58a,d65-66,g67a,c80t,g88a,c111t,a130g,d134-282;LP=1;RP=4;RA=-2;PRIOR=false;SR=1;AF=0.00090063;AC=6	.	.	.	0.00090063	.	.	.
1	27902772	ALU	TSD=AAAAAAAAAAATG;ASSESS=5;INTERNAL=NM_001297558,INTRONIC;SVTYPE=ALU;SVLEN=279;MEINFO=AluSz,1,280,+;DIFF=1:c4t,c10t,g21a,t65g,g81a,g88t,g112a,i129a,g152a,c153g,a163g,c197g,c261t;LP=65;RP=64;RA=0.022;PRIOR=false;SR=11;AF=0.000199681;AC=1	0.000199681	.	.	.	.	.	.
1	27916165	ALU	TSD=AAACAGATTTCCC;ASSESS=5;INTERNAL=NM_001297558,PROMOTER;SVTYPE=ALU;SVLEN=267;MEINFO=AluYa1_1,14,281,+;DIFF=0.98:c88t,t144c,g145a,g207a,g209a,c230g,t244a,g267a,a252c;LP=32;RP=215;RA=-2.748;PRIOR=false;SR=73;AF=0.0143266;AC=20	0.0107827	0.0143266	.	.	.	.	.
1	27921695	ALU	TSD=AGGATGGCTGATTCTT;ASSESS=5;INTERNAL=NM_001297558,PROMOTER;SVTYPE=ALU;SVLEN=278;MEINFO=AluYa4_5,3,281,-;DIFF=1:t89c,c96a,g145a,c174t;LP=111;RP=224;RA=-1.013;PRIOR=false;SR=189;AF=0.00279553;AC=14	0.00279553	.	.	.	.	.	.
1	27924771	ALU	TSD=TACATCCTTTTTT;ASSESS=5;INTERNAL=null,null;SVTYPE=ALU;SVLEN=280;MEINFO=AluYa1_2,1,281,-;DIFF=1:t89c,g145a,g237c;LP=37;RP=18;RA=1.04;PRIOR=false;SR=16;AF=0.000199681;AC=1	0.000199681	.	.	.	.	.	.
1	27967252	ALU	TSD=null;ASSESS=4;INTERNAL=XKR8,5_UTR;SVTYPE=ALU;SVLEN=154;MEINFO=AluY,127,281,+;DIFF=0.99:g5a,c20t,c53t,i65gt,a76t,c78t,t86g,g196c,g199t,c206t,g245a;LP=15;RP=12;RA=0.322;PRIOR=false;SR=3;AF=1.00737e-05;AC=1	.	.	.	.	.	.	1.00737e-05
1	27974751	ALU	TSD=TAGAAATGTGAGAAATTTT;ASSESS=5;INTERNAL=NM_001282561,INTRONIC;SVTYPE=ALU;SVLEN=268;MEINFO=AluYb6_2,13,281,+;DIFF=0.96:c4a,c57t,c64t,c98a,t144c,g211a,c236t,c276t,a252g;LP=27;RP=7;RA=1.948;PRIOR=false;SR=17;AF=0.000199681;AC=1	0.000199681	.	.	.	.	.	.
1	27984854	ALU	TSD=AAAGAGTTGTA;ASSESS=5;INTERNAL=NM_001282560,INTRONIC;SVTYPE=ALU;SVLEN=281;MEINFO=AluY,0,281,+;DIFF=1:c57t,c98t;LP=35;RP=31;RA=0.175;PRIOR=false;SR=27;AF=0.000199681;AC=1	0.000199681	.	.	.	.	.	.
1	27991275	LINE1	TSD=AAGAAGTCTTTCCAC;ASSESS=5;INTERNAL=NR_104214,INTRONIC;SVTYPE=LINE1;SVLEN=3268;MEINFO=L1Ambig,2751,6019,+;DIFF=0.11:n1-2749,t2860c,n3111-6019;LP=20;RP=15;RA=0.415;ISTP=0;PRIOR=false;SR=19;GENE=EYA3;AF=0.000199681;AC=1	0.000199681	.	.	0.000150105	.	.	.
1	27991784	SVA	TSD=null;ASSESS=4;INTERNAL=NR_104214,INTRONIC;SVTYPE=SVA;SVLEN=1240;MEINFO=SVA,75,1315,-;DIFF=0.35:n1-1071,a1079g,c1129g,c1146a,t1161c,c1163a,c1164t,g1183a,t1267c,g1268a,g1310t;LP=35;RP=71;RA=-1.02;PRIOR=false;SR=27;AF=0.00286533;AC=4;GENE=EYA3	0.00419329	0.00286533	.	0.00975683	.	.	.
1	27993256	ALU	TSD=null;ASSESS=3;INTERNAL=EYA3,INTRONIC;SVTYPE=ALU;SVLEN=279;MEINFO=AluYa3_1,1,280,+;DIFF=0.91:c57t,t89c,i94aa,c96a,g145a,g162a,c206t,g214a,c236t;LP=4;RP=30;RA=-2.907;PRIOR=false;SR=27;AF=0.000131945;AC=13	.	.	.	.	.	.	0.000131945
1	27993266	ALU	TSD=CTATTTTTTT;ASSESS=5;INTERNAL=NR_104214,INTRONIC;SVTYPE=ALU;SVLEN=274;MEINFO=AluYa5,7,281,-;DIFF=1:c57t,t89c,i94aa,c96a,g145a,c174t,g237c;LP=34;RP=36;RA=-0.082;PRIOR=false;SR=56;AF=0.000599042;AC=3	0.000599042	.	.	0.00330231	.	.	.
1	28023090	ALU	TSD=null;ASSESS=4;INTERNAL=NR_104214,INTRONIC;SVTYPE=ALU;SVLEN=279;MEINFO=AluY,1,280,-;DIFF=0.96:g5a,c20t,i65gt,a76t,c98t,c109t,c142t,c150t,c154t,g162a,c187t,g196a,g199t,g207a,g212a,g231a,g237c,c260t,c268t,c275g,c276t;LP=75;RP=102;RA=-0.444;PRIOR=false;SR=92;AF=0.0486111;AC=56	.	.	0.0301259	.	.	0.0486111	.
1	28026772	ALU	TSD=AAAAAAAAAAAA;ASSESS=5;INTERNAL=NR_104214,INTRONIC;SVTYPE=ALU;SVLEN=279;MEINFO=AluY,1,280,-;DIFF=0.96:g9a,c10t,g15a,c20t,g21a,g54a,i65gt,c98t,t101a,g199t,c260t;LP=27;RP=44;RA=-0.705;PRIOR=false;SR=5;AF=0.00260417;AC=3	.	.	.	.	.	0.00260417	.
1	28043346	ALU	TSD=null;ASSESS=4;INTERNAL=NR_104214,INTRONIC;SVTYPE=ALU;SVLEN=279;MEINFO=AluY,1,280,-;DIFF=1:g21a,c53t,c57t,g79a,g91a,t93c,c98t,c109t,g139a,g196c,g199t,g269a;LP=80;RP=100;RA=-0.322;PRIOR=false;SR=12;AF=0.00520833;AC=6	.	.	.	.	.	0.00520833	.
1	28067616	ALU	TSD=AAAAAATCTTACCCT;ASSESS=5;INTERNAL=NR_104214,INTRONIC;SVTYPE=ALU;SVLEN=242;MEINFO=AluYa,39,281,+;DIFF=0.86:g145a,g208a,c236t;LP=87;RP=118;RA=-0.44;PRIOR=false;SR=98;AF=0.00573066;AC=8;GENE=EYA3	0.00159744	0.00573066	.	0.00705494	.	.	.
1	28079008	ALU	TSD=CAACAGCCAGAATTCTT;ASSESS=5;INTERNAL=NR_104214,INTRONIC;SVTYPE=ALU;SVLEN=279;MEINFO=AluYa4_5,2,281,-;DIFF=1:t89c,c96a,g145a,c174t,c260t;LP=26;RP=51;RA=-0.972;PRIOR=false;SR=22;AF=0.000199681;AC=1	0.000199681	.	.	0.000150105	.	.	.
1	28123760	ALU	TSD=null;ASSESS=4;INTERNAL=null,null;SVTYPE=ALU;SVLEN=279;MEINFO=AluY,1,280,-;DIFF=0.9:g5a,g58a,c98t,g143a,g155a,g207a,g239a,g258a,g261t;LP=34;RP=51;RA=-0.585;PRIOR=false;SR=12;AF=0.000716332;AC=1	.	0.000716332	.	0.000750525	.	.	.
1	28183058	ALU	TSD=TTTGTGTTTGTTTTTT;ASSESS=5;INTERNAL=NM_001164721,INTRONIC;SVTYPE=ALU;SVLEN=280;MEINFO=AluYa1_1,1,281,-;DIFF=0.99:c10t,g21a,c57t,c98t,g145a;LP=33;RP=25;RA=0.401;PRIOR=false;SR=6;AF=0.00286533;AC=4;GENE=PTAFR	0.00239617	0.00286533	.	0.00165116	.	0.00434028	.
1	28189161	ALU	TSD=null;ASSESS=4;INTERNAL=NM_001164721,INTRONIC;SVTYPE=ALU;SVLEN=279;MEINFO=AluSz,1,280,+;DIFF=1:g9a,c53t,g58a,t65g,i129a,c139t,c155t,a163g,c197g,t200g,c214t,g219c,g232a,c239t,g272a;LP=19;RP=37;RA=-0.962;PRIOR=false;SR=35;AF=0.00173611;AC=2	.	.	.	.	0.00793651	0.00173611	.
1	28208547	ALU	TSD=AAAAAAAAAAAGAG;ASSESS=5;INTERNAL=DNAJC8,INTRONIC;SVTYPE=ALU;SVLEN=280;MEINFO=AluYb8,1,281,+;DIFF=1:c57t,c64t,c98a,t144c,g211a,c236t,i252gcagtcc,c248g,a252g;LP=22;RP=27;RA=-0.295;PRIOR=false;SR=15;AF=0.00030021;AC=2	.	.	.	0.00030021	.	.	.
1	28247158	ALU	TSD=AAAGAAAGAAAGAAAGAAAGAAAGAAA;ASSESS=5;INTERNAL=NM_178190,TERMINATOR;SVTYPE=ALU;SVLEN=279;MEINFO=AluSz,1,280,-;DIFF=0.88:c8t,c20t,g41a,g49a,c57t,t65g,c80t,t103a,t126a,i129a,c153g,c207t,g238a,c239a;LP=18;RP=9;RA=1;PRIOR=false;SR=101;AF=0.00716332;AC=10	0.0121805	0.00716332	0.00134892	.	.	0.00347222	.
1	28271316	ALU	TSD=AGAATAGACACTCCATG;ASSESS=5;INTERNAL=NM_031459,INTRONIC;SVTYPE=ALU;SVLEN=280;MEINFO=AluYa5,1,281,+;DIFF=1:t89c,c96a,g145a,a161c,c174t,g237c,i127a;LP=23;RP=30;RA=-0.383;PRIOR=false;SR=15;AF=0.000716332;AC=1;GENE=SESN2	0.000199681	0.000716332	.	.	.	.	.
1	28334412	ALU	TSD=null;ASSESS=3;INTERNAL=MED18,INTRONIC;SVTYPE=ALU;SVLEN=279;MEINFO=AluYa1_1,1,280,+;DIFF=0.88:c96a,c109t,g145a,g175a,g199t,c218g,c238t;LP=12;RP=12;RA=0;PRIOR=false;SR=8;AF=1.00735e-05;AC=1	.	.	.	.	.	.	1.00735e-05
1	28361525	SVA	TSD=TAAAAAATGGCGATCT;ASSESS=5;INTERNAL=NM_001048183,PROMOTER;SVTYPE=SVA;SVLEN=1240;MEINFO=SVA,75,1315,+;DIFF=0.4:n1-850,g880c,a886g,g898a,c909g,c920t,t922g,a931g,a934t,g938a,c945a,g1009t,c1019t,a1041g,a1053g,g1067a,a1068g,a1079g,a1102g,a1116g,c1129g,a1132g,c1157t,a1178g,g1268a,t1292c;LP=13;RP=349;RA=-4.747;PRIOR=false;SR=255;AF=0.0164756;AC=23	0.0129792	0.0164756	.	0.0363254	.	.	.
1	28374579	SVA	TSD=GAAATCTTTTATTAT;ASSESS=5;INTERNAL=NM_001048183,INTRONIC;SVTYPE=SVA;SVLEN=1240;MEINFO=SVA,75,1315,+;DIFF=0.46:n1-909,g938a,c945a,t970c,t985c,g1009t,a1053g,g1067a,a1079g,c1129g,c1146a,c1163a,c1164t,t1267c,g1268a,g1310t,n1316;LP=62;RP=71;RA=-0.196;PRIOR=false;SR=40;AF=0.00358166;AC=5;GENE=PHACTR4	0.00419329	0.00358166	.	0.011408	.	0.000868056	.
1	28419048	ALU	TSD=CTACTTTTATGATTTTTTT;ASSESS=5;INTERNAL=NM_001048183,INTRONIC;SVTYPE=ALU;SVLEN=278;MEINFO=AluYe,3,281,-;DIFF=1:c96a,t144a,i207ga,a210g,t219c,c236t,d264,d281;LP=1478;RP=2166;RA=-0.551;PRIOR=false;SR=2808;AF=0.302292;AC=422;GENE=PHACTR4	0.2498	0.302292	0.210432	0.418643	0.238095	0.22309	.
1	28432388	ALU	TSD=TTTTTTTTTTTTTTTTT;ASSESS=5;INTERNAL=NM_001048183,INTRONIC;SVTYPE=ALU;SVLEN=279;MEINFO=AluSz,1,280,+;DIFF=1:g9a,g11a,c48t,g58a,t65g,c111t,i129a,c139t,c143t,g154a,c157t,c173t,t200a,g208a,g215a,g238a,c239t,c244t,g262a,g270a,c277t;LP=110;RP=107;RA=0.04;PRIOR=false;SR=16;AF=0.000868056;AC=1	.	.	.	.	.	0.000868056	.
1	28439245	SVA	TSD=null;ASSESS=4;INTERNAL=NM_023923,INTRONIC;SVTYPE=SVA;SVLEN=1240;MEINFO=SVA,75,1315,-;DIFF=0.3:n1-840,g880c,a886g,g898a,t922g,a931g,a934t,g938a,c945a,g1009t,c1019t,a1053g,g1067a,a1079g,c1129g,t1292c;LP=15;RP=1;RA=3.907;PRIOR=false;SR=9;AF=0.000716332;AC=1;GENE=PHACTR4	0.00419329	0.000716332	.	.	.	.	.
1	28443273	ALU	TSD=TCTTTCTTTC;ASSESS=5;INTERNAL=NM_023923,INTRONIC;SVTYPE=ALU;SVLEN=279;MEINFO=AluY,1,280,+;DIFF=0.98:g11a,c20t,i65gt,c92a,g152c,c154t,g199t,c213t,c268t,t274a,c275a,c276t,g277a;LP=73;RP=62;RA=0.236;PRIOR=false;SR=107;AF=0.0182292;AC=21	0.00878594	.	0.0130396	.	0.0396825	0.0182292	.
1	28461853	ALU	TSD=null;ASSESS=3;INTERNAL=NM_023923,INTRONIC;SVTYPE=ALU;SVLEN=279;MEINFO=AluY,1,280,-;DIFF=1:c57t,t86g,t93c,c98t,g110a,c117t,g143a,g151a,c174t,c205t,g207a,g237a,c268t,g277a;LP=64;RP=76;RA=-0.248;PRIOR=false;SR=6;AF=0.000868056;AC=1	.	.	.	.	.	0.000868056	.
1	28462026	SVA	TSD=TGCTTTCTTTTTTG;ASSESS=5;INTERNAL=NM_023923,INTRONIC;SVTYPE=SVA;SVLEN=1298;MEINFO=SVA,18,1316,-;DIFF=0.34:n1-860,g880c,a886g,g898a,t922g,a931g,a934t,g938a,c945a,g1009t,c1019t,a1053g,n1062,g1067a,a1079g,c1128a,c1129g,c1157t,i1185aaggcc,g1268a,t1292c;LP=197;RP=24;RA=3.037;PRIOR=false;SR=137;AF=0.012894;AC=18;GENE=PHACTR4	.	0.012894	.	.	.	.	.
1	28465589	ALU	TSD=null;ASSESS=3;INTERNAL=NM_023923,INTRONIC;SVTYPE=ALU;SVLEN=279;MEINFO=AluY,1,280,+;DIFF=0.88:c4t,c8t,c48t,c98t,g110a,g139a,g162a,g214a,c243t,c260g,g271a,c276t;LP=42;RP=79;RA=-0.911;PRIOR=false;SR=8;AF=0.000199681;AC=1	0.000199681	.	.	.	.	.	.
1	28466343	ALU	TSD=null;ASSESS=3;INTERNAL=PHACTR4,INTRONIC;SVTYPE=ALU;SVLEN=279;MEINFO=AluY,1,280,+;DIFF=0.85:c53t,c57t,g65a,c78t,c96a,g110a,g139a,g151a,g152c,c154t,c174t,g196t,g199t,c206t,c218g,g237c;LP=61;RP=35;RA=0.801;PRIOR=false;SR=12;AF=3.02206e-05;AC=3	.	.	.	.	.	.	3.02206e-05
1	28514975	SVA	TSD=null;ASSESS=4;INTERNAL=NM_001048199,INTRONIC;SVTYPE=SVA;SVLEN=549;MEINFO=SVA,766,1315,-;DIFF=0.28:n1-765,a773g,n775,c801g,a825g,a827g,a836g,g837t,a838g,g840t,n871,n877,g880c,a886g,a897g,g898a,g918a,t922g,a931g,a934t,a935g,g938a,c945a,a975g,g1009t,c1019t,a1053g,g1067a,a1079g,c1129g,i1156t,c1157t,c1182t,a1216g,g1268a,t1292c;LP=57;RP=1;RA=5.833;PRIOR=false;SR=33;GENE=RCC1;AF=0.000599042;AC=3	0.000599042	.	.	.	.	.	.
1	28539125	ALU	TSD=AAGATGTCCTGAGGT;ASSESS=5;INTERNAL=NM_001048194,3_UTR;SVTYPE=ALU;SVLEN=281;MEINFO=AluYa5,0,281,+;DIFF=0.99:t89c,c96a,g145a,a161c,c174t,g237c,i127a;LP=14;RP=13;RA=0.107;PRIOR=false;SR=6;AF=0.000199681;AC=1	0.000199681	.	.	.	.	.	.
1	28550710	ALU	TSD=AAAAAAAAAAAAAAAAAAAAAAAAA;ASSESS=5;INTERNAL=NM_017846,PROMOTER;SVTYPE=ALU;SVLEN=279;MEINFO=AluY,1,280,+;DIFF=1:g5a,c8a,g9a,t93c,c98t,g143a,c150t,c154t,g196c,g199t,g207a,c218g;LP=32;RP=32;RA=0;PRIOR=false;SR=32;AF=0.0329513;AC=46	0.029353	0.0329513	0.00314748	0.0361753	.	.	.
1	28564636	ALU	TSD=null;ASSESS=3;INTERNAL=TRNAU1AP,INTRONIC;SVTYPE=ALU;SVLEN=279;MEINFO=AluSz,1,280,+;DIFF=0.56:c57t,d64-65,t78a,g88t,c95t,t100a,i134g,g144a,c151a,g152a,c153t,c199t,g208a,g215a,c237g,d241-282;LP=2;RP=9;RA=-2.17;PRIOR=false;SR=10;AF=1.00735e-05;AC=1	.	.	.	.	.	.	1.00735e-05
1	28622380	ALU	TSD=AAAAAAAAAAAAAAAAAAAA;ASSESS=5;INTERNAL=NM_005644,INTRONIC;SVTYPE=ALU;SVLEN=279;MEINFO=AluSz,1,280,-;DIFF=0.99:c57t,t65g,i129a,c139t,g152a,c153g,a163g,c197g,g219c,c231t,c237t,g238a,c261t,g270a;LP=46;RP=25;RA=0.88;PRIOR=false;SR=27;AF=0.00954861;AC=11	.	.	.	.	.	0.00954861	.
1	28687382	ALU	TSD=dCACAC;ASSESS=5;INTERNAL=GMEB1,INTRONIC;SVTYPE=ALU;SVLEN=279;MEINFO=AluYi,1,280,+;DIFF=0.81:t86g,t93c,c98t,g151a,g162a,g207a,g212a,c213t,c236t,g261c,c273t,g277a,a252c;LP=13;RP=23;RA=-0.823;PRIOR=false;SR=73;GENE=GMEB1;AF=0.454586;AC=1011	.	.	0.454586	.	.	.	.
1	28690203	ALU	TSD=null;ASSESS=3;INTERNAL=GMEB1,INTRONIC;SVTYPE=ALU;SVLEN=271;MEINFO=AluY,9,280,+;DIFF=0.96:c48t,c98t,g155a,c238t,g269a,c276a,g277a;LP=37;RP=6;RA=2.624;PRIOR=false;SR=19;AF=0.0124713;AC=1238	.	.	.	.	.	.	0.0124713
1	28690224	ALU	TSD=TTTTTTTTTTTTTTTTTTTTT;ASSESS=5;INTERNAL=NM_024482,INTRONIC;SVTYPE=ALU;SVLEN=279;MEINFO=AluY,1,280,+;DIFF=0.85:t93c,c98t,g110a,g196c,g199t,g207a,g239a;LP=26;RP=40;RA=-0.621;PRIOR=false;SR=50;AF=0.0633681;AC=73	0.0145767	.	0.00134892	0.0109577	.	0.0633681	.
1	28707673	ALU	TSD=TAGTTTT;ASSESS=5;INTERNAL=NM_024482,INTRONIC;SVTYPE=ALU;SVLEN=279;MEINFO=AluYa3_4,2,281,-;DIFF=1:g145a,c174t,g237c;LP=26;RP=49;RA=-0.914;PRIOR=false;SR=20;AF=0.000199681;AC=1	0.000199681	.	.	.	.	.	.
1	28749690	ALU	TSD=CAAAGGACTAATTCTTTT;ASSESS=5;INTERNAL=YTHDF2,INTRONIC;SVTYPE=ALU;SVLEN=279;MEINFO=AluYe,1,280,+;DIFF=0.86:c106a,t144a,a210g,t219c,c236t,d265;LP=28;RP=39;RA=-0.478;PRIOR=false;SR=11;AF=0.000150105;AC=1	.	.	.	0.000150105	.	.	.
1	28844180	ALU	TSD=TTTTTTTTTTTTTTTT;ASSESS=5;INTERNAL=NM_000911,INTRONIC;SVTYPE=ALU;SVLEN=279;MEINFO=AluY,1,280,-;DIFF=1:c4t,g11a,g21a,c57t,c98t,c138t,c142t,g196t,g199t,c218g,c236t,g237a,c238t;LP=44;RP=35;RA=0.33;PRIOR=false;SR=18;AF=0.0130208;AC=15	.	.	.	.	.	0.0130208	.
1	28926048	SVA	TSD=null;ASSESS=3;INTERNAL=NM_001166006,INTRONIC;SVTYPE=SVA;SVLEN=1240;MEINFO=SVA,75,1315,+;DIFF=0.49:n1-74,a78c,c126t,c158t,g159t,g163a,a167g,g174a,g178a,t182a,t202g,a231g,g241c,g250a,c253t,t269c,g271t,a292g,a295g,a304c,c305g,c306t,c312t,n314-316,a319g,t324c,a327g,a335g,c361t,t366c,c386t,a395g,n405-892,g938a,c945a,t970c,t985c,g1009t,a1053g,g1067a,a1079g,c1129g,c1146a,c1163a,c1164t,t1267c,g1268a,…	0.000199681	.	.	.	.	.	.
1	28929867	ALU	TSD=TTTTTTTTTTTTTTTTTTTTTTTT;ASSESS=5;INTERNAL=NM_001166006,INTRONIC;SVTYPE=ALU;SVLEN=279;MEINFO=AluY,1,280,+;DIFF=0.53:g5a,g65a,c112g,g139t,g143t,g151t,a178t,g207a,g214a,c230a,g237a,g239a,c260t,g269a,c276t;LP=51;RP=143;RA=-1.487;PRIOR=false;SR=66;AF=0.0179083;AC=25;GENE=EPB41	0.0279553	0.0179083	0.00044964	0.0304713	.	0.015625	.
1	28972993	ALU	TSD=TAAATTACCATTTTC;ASSESS=5;INTERNAL=NM_001166006,INTRONIC;SVTYPE=ALU;SVLEN=273;MEINFO=AluY,8,281,-;DIFF=0.98:c53t,c57t,c98a,g175a,c236t;LP=32;RP=26;RA=0.3;PRIOR=false;SR=11;AF=0.000199681;AC=1	0.000199681	.	.	.	.	.	.
1	28981613	ALU	TSD=GCCAGCATTATTTTTT;ASSESS=5;INTERNAL=NM_001166006,INTRONIC;SVTYPE=ALU;SVLEN=280;MEINFO=AluYa4_5,1,281,-;DIFF=1:t89c,c96a,g145a,c174t;LP=18;RP=15;RA=0.263;PRIOR=false;SR=14;AF=0.000199681;AC=1	0.000199681	.	.	.	.	.	.
1	29000976	ALU	TSD=AAGATTCATCTT;ASSESS=5;INTERNAL=EPB41,INTRONIC;SVTYPE=ALU;SVLEN=280;MEINFO=AluYb,1,281,-;DIFF=0.99:c8t,c57t,c98a,t144c,g211a,c236t,a252g;LP=17;RP=15;RA=0.181;PRIOR=false;SR=9;AF=0.000150105;AC=1	.	.	.	0.000150105	.	.	.
1	29013855	ALU	TSD=TTTTTTTTTTTTTTTTTTTTT;ASSESS=5;INTERNAL=NM_001166006,INTRONIC;SVTYPE=ALU;SVLEN=279;MEINFO=AluY,1,280,-;DIFF=0.9:g5a,c8a,g11a,g49a,c57t,g65a,c92t,c96t,c98t,g153a,g162a,c174t,g196c,g199t,c206t,c218g,g269a;LP=90;RP=67;RA=0.426;PRIOR=false;SR=11;AF=0.00299521;AC=15	0.00299521	.	.	.	.	.	.
1	29022391	ALU	TSD=AAAAAAAAAAAAAAAAAAA;ASSESS=5;INTERNAL=NM_001166006,INTRONIC;SVTYPE=ALU;SVLEN=269;MEINFO=AluSz,11,280,-;DIFF=0.95:t65g,i129a,g140a,c153g,a163g,c197g,c231t,c237t;LP=90;RP=123;RA=-0.451;PRIOR=false;SR=56;AF=0.0234375;AC=27	0.000599042	.	.	.	.	0.0234375	.
1	29030134	ALU	TSD=GGAAATTGTTT;ASSESS=5;INTERNAL=NM_001166006,INTRONIC;SVTYPE=ALU;SVLEN=280;MEINFO=AluYb6_2,1,281,-;DIFF=1:c57t,c64t,c98a,t144c,c174g,g211a,c236t,a252g;LP=15;RP=8;RA=0.907;PRIOR=false;SR=9;AF=0.000199681;AC=1	0.000199681	.	.	.	.	.	.
1	29046902	ALU	TSD=GGTCGTAATACTCTTTTCTTTTTT;ASSESS=5;INTERNAL=NM_001166006,INTRONIC;SVTYPE=ALU;SVLEN=281;MEINFO=AluYc1,0,281,-;DIFF=1:g148a;LP=81;RP=69;RA=0.231;PRIOR=false;SR=58;AF=0.00358166;AC=5;GENE=EPB41	.	0.00358166	.	.	.	.	.
1	29055667	ALU	TSD=AGAAAATAACTATGG;ASSESS=5;INTERNAL=NM_001166006,INTRONIC;SVTYPE=ALU;SVLEN=280;MEINFO=AluYa4_4,1,281,+;DIFF=1:g7a,c96a,a125g,g145a,c174t,g237c;LP=92;RP=58;RA=0.666;PRIOR=false;SR=29;GENE=EPB41;AF=0.00793651;AC=1	.	.	.	.	0.00793651	.	.
1	29059965	LINE1	TSD=GAGATCTAATCTTTT;ASSESS=5;INTERNAL=NM_001166006,INTRONIC;SVTYPE=LINE1;SVLEN=3969;MEINFO=L1Ta,2050,6019,-;DIFF=0.12:n1-5561,n5730;LP=12;RP=9;RA=0.415;ISTP=0;PRIOR=false;SR=13;GENE=EPB41;AF=0.000199681;AC=1	0.000199681	.	.	.	.	.	.
1	29096966	ALU	TSD=CAAATACTCTT;ASSESS=5;INTERNAL=NM_203342,INTRONIC;SVTYPE=ALU;SVLEN=143;MEINFO=AluY,138,281,-;DIFF=0.99:g5a,c8t,g9a,g21a,c48t,c53t,c57t,g79a,c98t;LP=10;RP=5;RA=1;PRIOR=false;SR=9;AF=0.000868056;AC=1	0.000399361	.	.	.	.	0.000868056	.
1	29135607	SVA	TSD=null;ASSESS=3;INTERNAL=null,null;SVTYPE=SVA;SVLEN=472;MEINFO=SVA,843,1315,+;DIFF=0.34:n1-842,t847g,t862c,g880c,g938a,c945a,t970c,t985c,g1009t,a1053g,g1067a,a1079g,c1129g,c1146a,c1163a,c1164t,t1267c,g1268a,g1310t;LP=1;RP=37;RA=-5.209;PRIOR=false;SR=18;AF=0.000399361;AC=2	0.000399361	.	.	.	.	.	.
1	29163776	ALU	TSD=AAAAAAACCCCGCCG;ASSESS=5;INTERNAL=NM_005626,INTRONIC;SVTYPE=ALU;SVLEN=280;MEINFO=AluYa4_3,1,281,+;DIFF=1:t89c,c96a,g148a,a161g,c174t,g237c,g265c;LP=11;RP=13;RA=-0.241;PRIOR=false;SR=14;AF=0.000199681;AC=1	0.000199681	.	.	.	.	.	.
1	29220034	ALU	TSD=GAGAAGTTTTAGTCTT;ASSESS=5;INTERNAL=MECR,INTRONIC;SVTYPE=ALU;SVLEN=280;MEINFO=AluY,1,281,-;DIFF=1:c268t;LP=26;RP=24;RA=0.115;PRIOR=false;SR=28;AF=0.00030021;AC=2	.	.	.	0.00030021	.	.	.
1	29338527	HERVK	TSD=null;ASSESS=1;INTERNAL=LINC01756,INTRONIC;SVTYPE=HERVK;SVLEN=8750;MEINFO=HERVK,8,8758,+;DIFF=0.02:n1-8075,a8239t,a8250c,n8277-8457,n8482,n8484,t8562c,a8576g,g8577a,t8672c,c8677t,t8680c,g8681c,t8682c,g8683c,c8691t,n8696-8759;LP=49;RP=27;RA=0.86;PRIOR=false;SR=0;AF=0.00030021;AC=2	.	.	.	0.00030021	.	.	.
1	29342043	ALU	TSD=AGTGCTTCTT;ASSESS=5;INTERNAL=LINC01756,INTRONIC;SVTYPE=ALU;SVLEN=281;MEINFO=AluYa5,0,281,-;DIFF=0.96:c57t,t89c,c96a,g145a,c174t,g237c;LP=15;RP=27;RA=-0.848;PRIOR=false;SR=4;AF=0.000150105;AC=1	.	.	.	0.000150105	.	.	.
1	29359683	HERVK	TSD=null;ASSESS=1;INTERNAL=LINC01756,PROMOTER;SVTYPE=HERVK;SVLEN=8431;MEINFO=HERVK,327,8758,-;DIFF=0.04:n1-8119,a8239t,a8250c,n8269-8284,t8296c,t8339c,c8341t,n8367-8397,a8472c,n8503,n8508-8523,a8529t,t8561c,t8562g,n8576,n8579-8580,c8583g,c8691t,c8697t,a8700g,c8709t,t8739g,n8745-8759;LP=44;RP=74;RA=-0.75;PRIOR=false;SR=0;AF=0.000150105;AC=1	.	.	.	0.000150105	.	.	.
1	29374628	ALU	TSD=TCATCCGTGTCTT;ASSESS=5;INTERNAL=LINC01756,PROMOTER;SVTYPE=ALU;SVLEN=280;MEINFO=AluYa,1,281,-;DIFF=0.68:t89c,c96a,g145a,g151a,g155t;LP=51;RP=42;RA=0.28;PRIOR=false;SR=90;AF=0.000750525;AC=5	.	.	.	0.000750525	.	.	.
1	29375971	SVA	TSD=null;ASSESS=4;INTERNAL=null,null;SVTYPE=SVA;SVLEN=362;MEINFO=SVA,953,1315,-;DIFF=0.28:n1-952,t970c,t985c,g1009t,a1053g,g1067a,a1079g,c1129g,c1146a,c1163a,c1164t,t1267c,g1268a,g1310t;LP=15;RP=1;RA=3.907;PRIOR=false;SR=7;AF=0.000199681;AC=1	0.000199681	.	.	.	.	.	.
1	29447617	ALU	TSD=null;ASSESS=4;INTERNAL=null,null;SVTYPE=ALU;SVLEN=279;MEINFO=AluY,1,280,+;DIFF=1:g9a,c20t,c57t,i65gt,g79a,c98t,g139a,g162a,g175a,g237a,g269a;LP=39;RP=73;RA=-0.904;PRIOR=false;SR=13;AF=0.00434028;AC=5	.	.	.	.	.	0.00434028	.
1	29458503	ALU	TSD=AAAGCAGCTCTC;ASSESS=5;INTERNAL=LINC01756,PROMOTER;SVTYPE=ALU;SVLEN=281;MEINFO=AluYb8,0,281,+;DIFF=1:c57t,c64t,c98a,t144c,g211a,c236t,i252gcagtcc,c248g,a252g;LP=14;RP=5;RA=1.485;PRIOR=false;SR=18;AF=0.00044964;AC=1	.	.	0.00044964	.	.	.	.
1	29526623	ALU	TSD=CCTCCCTCATCACTTTCT;ASSESS=5;INTERNAL=null,null;SVTYPE=ALU;SVLEN=280;MEINFO=AluYc1,1,281,-;DIFF=1:g148a;LP=22;RP=29;RA=-0.399;PRIOR=false;SR=25;AF=0.000199681;AC=1	0.000199681	.	.	0.000150105	.	.	.
1	29535908	ALU	TSD=TGAATGAACTCTT;ASSESS=5;INTERNAL=null,null;SVTYPE=ALU;SVLEN=281;MEINFO=AluYa3_4,0,281,-;DIFF=0.99:c98g,g145a,c174t,g237c;LP=505;RP=442;RA=0.192;PRIOR=false;SR=563;AF=0.023639;AC=33	0.0183706	0.023639	.	0.0607926	.	0.00520833	.
1	29536687	ALU	TSD=CCCTCCCTCCCTCCCTCCTTCCCTCCCTTC;ASSESS=5;INTERNAL=LINC01756,PROMOTER;SVTYPE=ALU;SVLEN=279;MEINFO=AluYb,1,280,-;DIFF=0.53:c57t,g110a,c138t,c154t,g175c,g180a;LP=10;RP=43;RA=-2.104;PRIOR=false;SR=27;AF=0.00210147;AC=14	.	.	.	0.00210147	.	.	.
1	29611816	ALU	TSD=CCCTTAGACCAGTTTTAT;ASSESS=5;INTERNAL=null,null;SVTYPE=ALU;SVLEN=278;MEINFO=AluY,3,281,-;DIFF=1:g54a,a76t,t93c,c98t,c236t;LP=28;RP=42;RA=-0.585;PRIOR=false;SR=14;AF=0.000199681;AC=1	0.000199681	.	.	.	.	.	.
1	29712567	LINE1	TSD=AAGAAACCTTT;ASSESS=5;INTERNAL=LINC01648,TERMINATOR;SVTYPE=LINE1;SVLEN=6016;MEINFO=L1Ambig,3,6019,-;DIFF=0.07:n1-3,i73g,c115a,c143t,g167a,t231c,t254a,c257t,n307-429,n581-6019;LP=9;RP=16;RA=-0.83;ISTP=0;PRIOR=false;SR=17;AF=0.000150105;AC=1	.	.	.	0.000150105	.	.	.
1	29760115	ALU	TSD=TTTTTTTTT;ASSESS=5;INTERNAL=LINC01648,TERMINATOR;SVTYPE=ALU;SVLEN=281;MEINFO=AluYa3_4,0,281,-;DIFF=1:c98a,g145a,c174t,g237c;LP=49;RP=24;RA=1.03;PRIOR=false;SR=33;AF=0.000450315;AC=3	.	.	.	0.000450315	.	.	.
1	29845088	ALU	TSD=AAAAAAATAACTTC;ASSESS=5;INTERNAL=null,null;SVTYPE=ALU;SVLEN=281;MEINFO=AluYa5a2,0,281,+;DIFF=1:g72a,t89c,c96a,g145a,c174t,g237c,i133a;LP=46;RP=44;RA=0.064;PRIOR=false;SR=58;AF=0.002149;AC=3	0.00279553	0.002149	.	0.0118583	.	0.00173611	.
1	29904223	LINE1	TSD=TTTTTTTTT;ASSESS=5;INTERNAL=null,null;SVTYPE=LINE1;SVLEN=6017;MEINFO=L1Ta1d,1,6018,+;DIFF=0.11:g210c,t231c,t254a,a388g,n447-6019;LP=121;RP=221;RA=-0.869;ISTP=0;PRIOR=false;SR=159;AF=0.0100287;AC=14	0.0061901	0.0100287	.	0.0249174	.	0.00173611	.
1	29955698	ALU	TSD=AAGAAATGATTTT;ASSESS=5;INTERNAL=LINC01648,TERMINATOR;SVTYPE=ALU;SVLEN=280;MEINFO=AluYa5,1,281,-;DIFF=1:t89c,c96a,g145a,c174t,g237c;LP=5;RP=14;RA=-1.485;PRIOR=false;SR=5;AF=0.000150105;AC=1	.	.	.	0.000150105	.	.	.
1	30181963	ALU	TSD=AAAGAACCCGCCCAACTG;ASSESS=5;INTERNAL=null,null;SVTYPE=ALU;SVLEN=126;MEINFO=AluYb,155,281,+;DIFF=1:g5a,c8t,c10t,g49a,c98t,c138t,g139a,g151a,g211a,c236t,c248g,i252gcagtcc,g253a,a252g;LP=15;RP=19;RA=-0.341;PRIOR=false;SR=19;AF=0.00143266;AC=2;GENE=LOC105378617	0.00139776	0.00143266	.	.	.	.	.
1	30255473	ALU	TSD=TATATACTCTCTT;ASSESS=5;INTERNAL=null,null;SVTYPE=ALU;SVLEN=280;MEINFO=AluYa1_1,1,281,-;DIFF=1:g145a;LP=12;RP=10;RA=0.263;PRIOR=false;SR=13;AF=0.000716332;AC=1;GENE=LOC105378618	0.000399361	0.000716332	.	.	.	.	.
1	30316742	ALU	TSD=AGAAGCCATAAGTC;ASSESS=5;INTERNAL=null,null;SVTYPE=ALU;SVLEN=281;MEINFO=AluYa5,0,281,+;DIFF=1:t89c,c96a,g145a,c174t,g237c;LP=7;RP=15;RA=-1.1;PRIOR=false;SR=16;AF=0.000199681;AC=1	0.000199681	.	.	.	.	.	.
1	30334393	ALU	TSD=AGAAACTCTCCC;ASSESS=5;INTERNAL=null,null;SVTYPE=ALU;SVLEN=281;MEINFO=AluYa2,0,281,+;DIFF=1:g145a,c174t,c236t;LP=22;RP=35;RA=-0.67;PRIOR=false;SR=14;AF=0.000716332;AC=1	0.000199681	0.000716332	.	.	.	.	.
1	30341764	ALU	TSD=AAAAAACAAATTTAA;ASSESS=5;INTERNAL=LINC01648,PROMOTER;SVTYPE=ALU;SVLEN=281;MEINFO=AluYe,0,281,+;DIFF=1:t144a,a171t,a210g,t219c,c236t,d265;LP=63;RP=57;RA=0.144;PRIOR=false;SR=85;AF=0.00090063;AC=6	.	.	.	0.00090063	.	.	.
1	30465036	ALU	TSD=AAAAAAAAAAGAAAAGAAA;ASSESS=5;INTERNAL=null,null;SVTYPE=ALU;SVLEN=279;MEINFO=AluY,1,280,+;DIFF=0.65:c48t,i65gt,a76t,t93c,g155a,g175a;LP=65;RP=56;RA=0.215;PRIOR=false;SR=35;AF=0.00259585;AC=13	0.00259585	.	.	.	.	.	.
1	30509856	ALU	TSD=AAAACATTAATACAT;ASSESS=5;INTERNAL=null,null;SVTYPE=ALU;SVLEN=239;MEINFO=AluYb8,42,281,+;DIFF=0.95:c8t,g11a,c22t,a28t,c57t,c64t,c98a,t144c,g211a,g214a,c236t,i252gcagtcc,c248g,a252g;LP=12;RP=14;RA=-0.222;PRIOR=false;SR=11;AF=0.000199681;AC=1	0.000199681	.	.	.	.	.	.
1	30549700	ALU	TSD=AAGATTTTCTTTT;ASSESS=5;INTERNAL=null,null;SVTYPE=ALU;SVLEN=263;MEINFO=AluYb7_3,18,281,+;DIFF=1:c57t,c98a,t144c,g151a,g211a,c236t,i252gcagtcc,c248g,a252g;LP=19;RP=12;RA=0.663;PRIOR=false;SR=13;AF=0.000199681;AC=1	0.000199681	.	.	.	.	.	.
1	30568818	LINE1	TSD=AAAAAAAA;ASSESS=5;INTERNAL=null,null;SVTYPE=LINE1;SVLEN=297;MEINFO=L1Ta,5721,6018,+;DIFF=0.04:n1-5720,t5737a,t5896c,c5945t;LP=5;RP=24;RA=-2.263;ISTP=0;PRIOR=false;SR=24;AF=0.126984;AC=16	.	.	.	.	0.126984	.	.
1	30617673	ALU	TSD=TCAGATTCTTTTT;ASSESS=5;INTERNAL=null,null;SVTYPE=ALU;SVLEN=281;MEINFO=AluYa5,0,281,-;DIFF=1:t89c,c96a,g145a,c174t,g237c;LP=716;RP=620;RA=0.208;PRIOR=false;SR=800;AF=0.0329513;AC=46	0.028754	0.0329513	.	0.0466827	.	0.00954861	.
1	30776344	ALU	TSD=null;ASSESS=4;INTERNAL=null,null;SVTYPE=ALU;SVLEN=279;MEINFO=AluYa5a2,1,280,+;DIFF=0.69:c4t,g9a,g11a,c48t,g72a,t89c,c96a,g145a,c174t,g237c,d271-281,i133a;LP=23;RP=10;RA=1.202;PRIOR=false;SR=3;AF=0.00143266;AC=2;GENE=LOC105378621	.	0.00143266	.	.	.	.	.
1	30866295	ALU	TSD=dGGG;ASSESS=5;INTERNAL=SDC3,TERMINATOR;SVTYPE=ALU;SVLEN=66;MEINFO=AluSz,215,281,-;DIFF=0.73:g21a,c22t,t39g,g54a,d64-65,t78a,g88t,c95t,i129a,t134a,c139t,g144a,g154a,c155t,g198a,c205t,g208a,c214t,g219a,c231t,c237t,g266c,a273t,g278a;LP=39;RP=45;RA=-0.206;PRIOR=false;SR=552;AF=0.0601921;AC=401	.	.	.	0.0601921	.	.	.
1	30887521	ALU	TSD=AAAGCTCACC;ASSESS=5;INTERNAL=NM_014654,INTRONIC;SVTYPE=ALU;SVLEN=191;MEINFO=AluYb6_2,90,281,+;DIFF=1:c57t,c64t,c98a,i127aa,t144c,g211a,c236t,a252c;LP=23;RP=11;RA=1.064;PRIOR=false;SR=10;AF=0.000868056;AC=1	0.000199681	.	.	0.002852	.	0.000868056	.
1	30960627	ALU	TSD=AAAAGATAAAACCGG;ASSESS=5;INTERNAL=NM_001020658,INTRONIC;SVTYPE=ALU;SVLEN=280;MEINFO=AluYb,1,281,+;DIFF=0.89:c4t,c8t,c57t,g65a,c98a,t144c,c174g,g211a,c236t,c248g;LP=61;RP=112;RA=-0.877;PRIOR=false;SR=33;AF=0.000399361;AC=2	0.000399361	.	.	0.000750525	.	.	.
1	30971258	ALU	TSD=null;ASSESS=3;INTERNAL=NM_001020658,INTRONIC;SVTYPE=ALU;SVLEN=274;MEINFO=AluYa5,7,281,+;DIFF=1:g5a,c10t,c32t,g79a,t89c,c96a,g145a,c174t,g237c,i127a;LP=4;RP=11;RA=-1.459;PRIOR=false;SR=6;AF=0.000199681;AC=1	0.000199681	.	.	.	.	.	.
1	30991500	SVA	TSD=AATCTCCAAAGA;ASSESS=5;INTERNAL=PUM1,INTRONIC;SVTYPE=SVA;SVLEN=905;MEINFO=SVA,410,1315,-;DIFF=0.26:n1-409,n418,c445a,c452t,g456a,g460a,a487c,c494a,a513g,n561-591,a594t,t597g,g632a,a653g,i658c,a668g,c670a,c677t,c678g,g685a,c716t,t729c,n735-1067,a1079g,c1129g,c1146a,c1163a,c1164t,t1267c,g1268a,g1310t,a1311t;LP=5;RP=6;RA=-0.263;PRIOR=false;SR=2;AF=0.000150105;AC=1	.	.	.	0.000150105	.	.	.
1	31012552	ALU	TSD=null;ASSESS=3;INTERNAL=PUM1,INTRONIC;SVTYPE=ALU;SVLEN=279;MEINFO=AluSg,1,280,+;DIFF=0.13:g5a,c8t,g49a,c53t,g58a,d65-66,g67a,t71c,c80t,g93a,a107g,i129n,g140t,g152a,c153g,c155a,c170g,d175-282;LP=1;RP=2;RA=-1;PRIOR=false;SR=1;AF=0.0103573;AC=69	.	.	.	0.0103573	.	.	.
1	31083356	ALU	TSD=AAAAAAAAAAAA;ASSESS=5;INTERNAL=NKAIN1,TERMINATOR;SVTYPE=ALU;SVLEN=279;MEINFO=AluSg,1,280,-;DIFF=0.4:g5a,g9a,c10t,g15t,c16t,c20t,g54a,g58a,d65-66,g67a,g77a,t78a,c109a,c111t,i129n,c139t,g150a,g152a,c153t,g156a,d163-282;LP=268;RP=100;RA=1.422;PRIOR=false;SR=70;AF=0.00165116;AC=11	.	.	.	0.00165116	.	.	.
1	31087603	SVA	TSD=null;ASSESS=3;INTERNAL=null,null;SVTYPE=SVA;SVLEN=300;MEINFO=SVA,1015,1315,+;DIFF=0.11:n1-1040,n1043,n1047-1048,n1051-1054,n1056,n1058-1060,n1063-1065,g1067a,n1071,a1079g,c1129g,n1137,c1146a,c1163a,c1164t,t1267c,g1268a,n1296-1299,n1310-1312,n1315-1316;LP=1;RP=5;RA=-2.322;PRIOR=false;SR=6;AF=0.000868056;AC=1	0.000199681	.	.	.	0.00793651	0.000868056	.
1	31132511	SVA	TSD=AAAAATTAG;ASSESS=5;INTERNAL=null,null;SVTYPE=SVA;SVLEN=1288;MEINFO=SVA,28,1316,+;DIFF=0.27:n1-948,g1009t,c1019t,a1041g,a1053g,g1067a,a1068g,a1079g,a1102g,a1116g,c1129g,a1132g,c1157t,a1178g,g1268a,t1292c;LP=1;RP=29;RA=-4.858;PRIOR=false;SR=19;AF=0.000399361;AC=2	0.000399361	.	.	.	.	.	.
1	31213137	ALU	TSD=null;ASSESS=4;INTERNAL=NM_024522,INTRONIC;SVTYPE=ALU;SVLEN=279;MEINFO=AluY,1,280,+;DIFF=0.94:c10t,c53t,i65gt,t86g,t93c,c98t,g162a,c236a,c238a,g239a,c260a;LP=34;RP=48;RA=-0.497;PRIOR=false;SR=9;AF=0.0303819;AC=35	.	.	.	.	.	0.0303819	.
1	31214015	ALU	TSD=dTAATTAATTAATT;ASSESS=5;INTERNAL=NKAIN1,INTRONIC;SVTYPE=ALU;SVLEN=279;MEINFO=AluY,1,280,+;DIFF=0.99:c4t,c20t,c48t,c57t,c64t,g81a,c98t,g110a,c138t,c142t,g146a,c150t,g151a,c154t,g162a,c174t,g179a,g196t,g199t,c206t,g207a,c213t,c218g,c238t,c243t,g257a,c260t,g261a,g265c,g269a,c276t;LP=4;RP=8;RA=-1;PRIOR=false;SR=12;AF=0.167817;AC=1118	.	.	.	0.167817	.	.	.
1	31231353	ALU	TSD=TTTTTTTTTTTTTTTTTTT;ASSESS=5;INTERNAL=NKAIN1,INTRONIC;SVTYPE=ALU;SVLEN=275;MEINFO=AluSz,5,280,-;DIFF=0.48:g11t,c16g,g49a,c57t,t65g,c80t,a99g,c111t,i121a,t126a,c128a,t134g,c153g,a163g,c165t,c197g,t200a,c207t,g215a,g238a,c261t,d282;LP=93;RP=111;RA=-0.255;PRIOR=false;SR=18;AF=0.000150105;AC=1	.	.	.	0.000150105	.	.	.
1	31259755	ALU	TSD=null;ASSESS=3;INTERNAL=NM_004814,3_UTR;SVTYPE=ALU;SVLEN=279;MEINFO=AluSq,1,280,-;DIFF=0.98:g9a,g21a,g54a,c57t,t65g,g93a,t103a,g112a,i129a,c153g,a163g,c197g,t200g,c207t,c214t,c231t,g232a,g272a,c277t;LP=25;RP=48;RA=-0.941;PRIOR=false;SR=16;AF=0.015625;AC=18	.	.	0.00044964	.	.	0.015625	.
1	31274665	ALU	TSD=AAAAAAAAAAAAAAAAAAAA;ASSESS=5;INTERNAL=SNRNP40,INTRONIC;SVTYPE=ALU;SVLEN=278;MEINFO=AluSz,2,280,+;DIFF=0.99:c57t,t65g,t78a,g88t,c95t,i129a,c153g,g156a,g208a,c237t,g254a,g262a,i265a,c269t,c274t,c280t;LP=5;RP=14;RA=-1.485;PRIOR=false;SR=2;AF=0.00030021;AC=2	.	.	.	0.00030021	.	.	.
1	31275064	ALU	TSD=AAAAGGTGCTTGTT;ASSESS=5;INTERNAL=SNRNP40,INTRONIC;SVTYPE=ALU;SVLEN=278;MEINFO=AluYb8,3,281,+;DIFF=1:c57t,c64t,c98a,t144c,g211a,c236t,i252gcagtcc,c248g,a252g;LP=99;RP=83;RA=0.254;PRIOR=false;SR=121;AF=0.00135095;AC=9	.	.	.	0.00135095	.	.	.
1	31279057	ALU	TSD=AAAAAACAAAAAAAA;ASSESS=5;INTERNAL=NM_004814,INTRONIC;SVTYPE=ALU;SVLEN=279;MEINFO=AluYb8,2,281,+;DIFF=1:c57t,c64t,c98a,t144c,g211a,c236t,i252gcagtcc,c248g,a252g;LP=349;RP=442;RA=-0.341;PRIOR=false;SR=369;AF=0.0179083;AC=25;GENE=SNRNP40	0.014976	0.0179083	.	0.0426298	.	0.00520833	.
1	31288681	ALU	TSD=TTTTTTTTTTTTTT;ASSESS=5;INTERNAL=NM_004814,INTRONIC;SVTYPE=ALU;SVLEN=279;MEINFO=AluY,1,280,+;DIFF=0.94:g5a,c8t,g11a,c20t,g21t,c48t,g49a,g79a,c98t,g155a,g199a,c206t,c238t,c263t,g269a;LP=113;RP=164;RA=-0.537;PRIOR=false;SR=63;AF=0.00520833;AC=6	.	.	.	.	.	0.00520833	.
1	31313730	ALU	TSD=GAAACTGATTTTTCT;ASSESS=5;INTERNAL=NM_016505,INTRONIC;SVTYPE=ALU;SVLEN=279;MEINFO=AluY,1,280,-;DIFF=0.97:g9a,c53t,c57t,i65gt,c98t,g139a,c150t,c174t,c213t,c218g,d281;LP=86;RP=128;RA=-0.574;PRIOR=false;SR=9;AF=0.000599042;AC=3	0.000599042	.	.	.	.	.	.
1	31314457	ALU	TSD=AAAAAAAAAAAAAAA;ASSESS=5;INTERNAL=NM_016505,INTRONIC;SVTYPE=ALU;SVLEN=278;MEINFO=AluSz,2,280,+;DIFF=0.95:g9a,g21a,c53t,c57t,t65g,g112a,i129a,c153g,c155t,a163g,c197t,g208a,c214t,c231t,g232a,c237t,g238a,c239t,c269t,c277t,d282;LP=94;RP=121;RA=-0.364;PRIOR=false;SR=30;AF=0.000868056;AC=1	.	.	.	.	.	0.000868056	.
1	31337043	ALU	TSD=CAATTTGCAGTTTT;ASSESS=5;INTERNAL=ZCCHC17,INTRONIC;SVTYPE=ALU;SVLEN=279;MEINFO=AluYa5,2,281,-;DIFF=1:t89c,c96a,g145a,c174t,g237c,a270g,i127a;LP=5;RP=9;RA=-0.848;PRIOR=false;SR=10;AF=0.000150105;AC=1	.	.	.	0.000150105	.	.	.
1	31451327	ALU	TSD=AAGAATTGTCTATTCAT;ASSESS=5;INTERNAL=null,null;SVTYPE=ALU;SVLEN=255;MEINFO=AluYa,26,281,+;DIFF=0.91:t89c,c96a,i119aaa,g145a,c174t,g237c,g265c;LP=132;RP=152;RA=-0.204;PRIOR=false;SR=161;AF=0.00787966;AC=11	0.00479233	0.00787966	.	0.0135095	.	0.00434028	.
1	31534214	ALU	TSD=TTTTTTTTTTTTTTTTTTTTTTTTTT;ASSESS=5;INTERNAL=NR_027085,TERMINATOR;SVTYPE=ALU;SVLEN=279;MEINFO=AluSz,1,280,-;DIFF=0.91:g5a,c57t,t65g,c80t,c95t,c111t,g112a,c151t,g152a,c153g,c197g,t200a,g213a,g219c,c264a,c269t,c274a,g278a;LP=41;RP=65;RA=-0.665;PRIOR=false;SR=24;AF=0.0121528;AC=14	.	.	.	.	.	0.0121528	.
1	31538750	LINE1	TSD=TATTTCATTTTTTT;ASSESS=5;INTERNAL=null,null;SVTYPE=LINE1;SVLEN=6018;MEINFO=L1Ta1d,1,6019,-;DIFF=0.06:n1,t231c,t254a,n317-6019;LP=3;RP=28;RA=-3.222;ISTP=0;PRIOR=false;SR=23;AF=0.00347222;AC=4	0.00159744	.	.	0.00240168	0.015873	0.00347222	.
1	31553451	ALU	TSD=TGGTTCTATTTTTTTT;ASSESS=5;INTERNAL=null,null;SVTYPE=ALU;SVLEN=261;MEINFO=AluYb8,20,281,-;DIFF=0.94:c57t,c64t,c98a,t144c,g211a,c236t,i252gcagtcc,c248g,a252g;LP=53;RP=43;RA=0.302;PRIOR=false;SR=40;AF=0.002149;AC=3;GENE=LOC105378627	0.00119808	0.002149	.	0.00840588	0.00793651	.	.
1	31595454	ALU	TSD=null;ASSESS=3;INTERNAL=NM_001204415,TERMINATOR;SVTYPE=ALU;SVLEN=279;MEINFO=AluSz,1,280,+;DIFF=0.87:c4t,g9a,g58a,t65g,g81a,i129a,c153t,c155t,g176a,c206g,c207t,g215a,g219c,g232a,g238c,c239t,g270c,d276-282;LP=95;RP=99;RA=-0.06;PRIOR=false;SR=343;AF=0.207465;AC=239	0.136781	.	0.20009	.	.	0.207465	.
1	31595457	ALU	TSD=AAA;ASSESS=5;INTERNAL=NM_001204415,TERMINATOR;SVTYPE=ALU;SVLEN=279;MEINFO=AluSq,1,280,+;DIFF=0.94:g5a,c8t,g11a,a36c,g52a,c53t,g58a,a63c,t65c,t66c,g67a,g74a,t78g,g81a,c86t,c139t,c143t,g144a,c151t,c153g,g215a,c231t,c239t,c269t,g272a;LP=136;RP=181;RA=-0.412;PRIOR=false;SR=717;AF=0.12894;AC=180	.	0.12894	.	0.0388772	.	.	.
1	31603598	ALU	TSD=CATGCTTTCTT;ASSESS=5;INTERNAL=HCRTR1,PROMOTER;SVTYPE=ALU;SVLEN=280;MEINFO=AluYa5,1,281,-;DIFF=1:t89c,c96a,g110a,g145a,g151a,c174t,g237c,c268t,t278a,i127a;LP=21;RP=31;RA=-0.562;PRIOR=false;SR=12;AF=0.000150105;AC=1	.	.	.	0.000150105	.	.	.
1	31690416	ALU	TSD=AGAAAAGAGGCAATGGGC;ASSESS=5;INTERNAL=COL16A1,INTRONIC;SVTYPE=ALU;SVLEN=278;MEINFO=AluYa,3,281,+;DIFF=0.51:t89c,c96a,g151a,g152c,g153a,g155a,c260t,c263t,g265a,t274c,c276t;LP=15;RP=3;RA=2.322;PRIOR=false;SR=9;AF=1.00735e-05;AC=1	.	.	.	.	.	.	1.00735e-05
1	31852877	LINE1	TSD=AAAAACACAAAA;ASSESS=5;INTERNAL=null,null;SVTYPE=LINE1;SVLEN=588;MEINFO=L1Ambig,5430,6018,+;DIFF=0.02:n1-5429,n5441,n5445,t5455a,t5461g,g5474a,t5523c,t5535g,g5538t,n5542-5572,t5582c,c5585t,t5628a,g5652c,n5665,n5677-5678,n5680,n5691,a5712g,c5726g,n5733-6019;LP=6;RP=15;RA=-1.322;ISTP=0;PRIOR=false;SR=8;AF=0.00173611;AC=2	.	.	.	.	.	0.00173611	.
1	31891954	ALU	TSD=AAAAAATTAGTTGA;ASSESS=5;INTERNAL=null,null;SVTYPE=ALU;SVLEN=281;MEINFO=AluYa5,0,281,+;DIFF=1:t89c,c96a,g145a,c174t,g199a,g237c;LP=87;RP=155;RA=-0.833;PRIOR=false;SR=137;AF=0.0157593;AC=22	0.014377	0.0157593	.	0.0363254	.	0.00520833	.
1	31894599	ALU	TSD=AAAAAAAAAAAAAAAA;ASSESS=5;INTERNAL=null,null;SVTYPE=ALU;SVLEN=279;MEINFO=AluY,1,280,+;DIFF=0.96:g9a,c57t,i65gt,a76t,c98t,c150t,c198t,g199a,g207a,c213t,g214a,g237a,c238t,c260t,c276t,g277c;LP=47;RP=58;RA=-0.303;PRIOR=false;SR=44;AF=0.0581597;AC=67	.	.	.	.	.	0.0581597	.
1	31915820	SVA	TSD=null;ASSESS=3;INTERNAL=PTP4A2,INTRONIC;SVTYPE=SVA;SVLEN=871;MEINFO=SVA,445,1316,-;DIFF=0.17:n1-427,n460,a487t,c498t,a513g,a561c,t564c,a578g,t580c,t582c,g603t,n624-650,n654,n657-658,c663t,i703gt,t703c,c704a,a705g,g706c,c712g,c723t,c724g,t729c,g764c,n767,t770a,a773g,n788,n790,a802g,t810c,n817-855,t862c,t863c,g880c,t889c,n916,n932-1316;LP=1;RP=23;RA=-4.524;PRIOR=false;SR=16;AF=3.02828e-05;AC=3	.	.	.	.	.	.	3.02828e-05
1	31915833	SVA	TSD=CTGGCCTAGTTTT;ASSESS=5;INTERNAL=NM_080391,INTRONIC;SVTYPE=SVA;SVLEN=871;MEINFO=SVA,445,1316,-;DIFF=0.34:n1-418,n421-422,g427t,n430,n438,n443,g460a,i478gt,t478c,c479a,a480g,g481c,a487t,c498t,c499g,a513g,a561c,t564c,a578g,t580c,t582c,g603t,g636a,a653g,i703gt,t703c,c704a,a705g,g706c,c712g,c723t,c724g,t729c,g764c,a773g,a782g,c785g,g795a,g840c,t847g,t862c,t863c,g880c,t889c,n919,g938a,c945a,n947,t9…	0.000199681	0.000716332	.	.	.	.	.
1	31926206	SVA	TSD=null;ASSESS=3;INTERNAL=PTP4A2,INTRONIC;SVTYPE=SVA;SVLEN=1240;MEINFO=SVA,75,1315,+;DIFF=0.31:n1-990,g1009t,a1053g,g1067a,a1079g,c1129g,c1143a,c1146a,c1163a,c1164t,t1267c,g1268a,g1310t;LP=5;RP=11;RA=-1.138;PRIOR=false;SR=4;AF=0.000150105;AC=1	.	.	.	0.000150105	.	.	.
1	32061954	ALU	TSD=TTTTTTTTTTTTTTTTTTTTTTTTTTTTT;ASSESS=5;INTERNAL=NR_073499,TERMINATOR;SVTYPE=ALU;SVLEN=279;MEINFO=AluY,1,280,+;DIFF=0.73:g54a,a76t,c98t,g110a,g143a,g151a,g155a,g162a,a203g,c206t,g209a,c230t,c236g,c275g;LP=37;RP=50;RA=-0.434;PRIOR=false;SR=34;AF=0.100694;AC=116	0.115016	.	0.0382194	0.265086	.	0.100694	.
1	32073605	ALU	TSD=AAAGAGAGGAGAGTGGG;ASSESS=5;INTERNAL=TMEM39B,INTRONIC;SVTYPE=ALU;SVLEN=280;MEINFO=AluYa5,1,281,+;DIFF=1:t89c,c96a,i119aaa,g145a,c174t,g237c;LP=18;RP=13;RA=0.469;PRIOR=false;SR=12;AF=0.000150105;AC=1	.	.	.	0.000150105	.	.	.
1	32088582	ALU	TSD=null;ASSESS=4;INTERNAL=NM_018056,INTRONIC;SVTYPE=ALU;SVLEN=279;MEINFO=AluY,1,280,-;DIFF=1:c4t,c10t,c57t,c78t,t93c,c98t,g139a;LP=48;RP=55;RA=-0.196;PRIOR=false;SR=9;AF=0.0147569;AC=17	.	.	.	.	.	0.0147569	.
1	32088772	ALU	TSD=null;ASSESS=4;INTERNAL=NM_018056,INTRONIC;SVTYPE=ALU;SVLEN=279;MEINFO=AluY,1,280,+;DIFF=1:c4a,c78t,t86g,t93c,c98t,g143a,c213t;LP=34;RP=20;RA=0.766;PRIOR=false;SR=15;AF=0.00358166;AC=5;GENE=TMEM39B	0.00219649	0.00358166	0.0044964	0.00060042	0.015873	.	.
1	32130246	ALU	TSD=TTTTTTTTTTTTTTTTTTTTTTTT;ASSESS=5;INTERNAL=KPNA6,INTRONIC;SVTYPE=ALU;SVLEN=279;MEINFO=AluY,1,280,-;DIFF=0.99:c57t,g58a,g65a,c98t,g99a,c109t,c138t,c150t,g155a,g237a,g239a,c268t,c276t,g277a;LP=22;RP=18;RA=0.29;PRIOR=false;SR=4;AF=0.000750751;AC=5	.	.	.	0.000750751	.	.	.
1	32173667	ALU	TSD=AATGAAGCAAAATAT;ASSESS=5;INTERNAL=KPNA6,3_UTR;SVTYPE=ALU;SVLEN=281;MEINFO=AluYh,0,281,+;DIFF=0.86:c48a,c64t,g99a,t111c,g237c;LP=12;RP=11;RA=0.126;PRIOR=false;SR=17;AF=0.000150105;AC=1	.	.	.	0.000150105	.	.	.
1	32243109	ALU	TSD=TTTATTTATTTATTTATTTATTTATTT;ASSESS=5;INTERNAL=NR_026850,PROMOTER;SVTYPE=ALU;SVLEN=279;MEINFO=AluY,1,280,-;DIFF=0.94:c4t,c20t,c57t,a76t,t93c,c98t,c138t,c236t,c238t,g257a,g261a,c268t;LP=41;RP=53;RA=-0.37;PRIOR=false;SR=87;AF=0.000399361;AC=2	0.000399361	.	.	.	.	.	.
1	32262848	ALU	TSD=null;ASSESS=1;INTERNAL=NM_005356,INTRONIC;SVTYPE=ALU;SVLEN=279;MEINFO=AluSg,1,280,+;DIFF=0.88:c8t,c10t,g15a,c48t,c57t,d65-66,c86t,c111t,i129n,g144t,c151t,c197g;LP=51;RP=73;RA=-0.517;PRIOR=false;SR=0;AF=0.000599042;AC=3	0.000599042	.	.	.	.	.	.
1	32262868	ALU	TSD=null;ASSESS=3;INTERNAL=LCK,INTRONIC;SVTYPE=ALU;SVLEN=279;MEINFO=AluSz,1,280,-;DIFF=0.48:g9a,c48t,t65g,i129a,c139t,g144a,g150a,c155t,a163g,c175g,g184c,c197t,g215a,c231t,g238a,c239t,c242t,g254t,d257-282;LP=14;RP=17;RA=-0.28;PRIOR=false;SR=3;AF=0.00150105;AC=10	.	.	.	0.00150105	.	.	.
1	32262887	ALU	TSD=AAAAAAAAAAAAAAAAAAA;ASSESS=5;INTERNAL=NM_005356,INTRONIC;SVTYPE=ALU;SVLEN=278;MEINFO=AluY,2,280,+;DIFF=0.8:g5a,c57t,g58a,c98t,g110a,c138t,g141t,c142a,g143a,g152t,g155a,g162a,c174t,g196t,g199t,c206t,g207a,c213t,c218a,c230t,g231a,g237a,c241a,c268g,g269a;LP=51;RP=50;RA=0.029;PRIOR=false;SR=54;AF=0.0104167;AC=12	.	.	.	.	.	0.0104167	.
1	32301799	SVA	TSD=null;ASSESS=3;INTERNAL=NM_004964,INTRONIC;SVTYPE=SVA;SVLEN=369;MEINFO=SVA,946,1315,-;DIFF=0.23:n1-945,g1009t,c1019t,a1041g,a1053g,g1067a,a1068g,a1079g,a1102g,a1116g,c1129g,a1132g,c1157t,a1178g,g1268a,t1292c;LP=11;RP=1;RA=3.459;PRIOR=false;SR=2;GENE=HDAC1;AF=0.000199681;AC=1	0.000199681	.	.	.	.	.	.
1	32368047	ALU	TSD=TTTTTTTTTTTTTTT;ASSESS=5;INTERNAL=BSDC1,3_UTR;SVTYPE=ALU;SVLEN=207;MEINFO=AluY,74,281,+;DIFF=1:t93c,c98t,g143a,g151a,g162a,g261a;LP=71;RP=20;RA=1.828;PRIOR=false;SR=32;AF=0.00113831;AC=113	.	.	.	.	.	.	0.00113831
1	32393831	SVA	TSD=AATAAATTGCTCCTTCCT;ASSESS=5;INTERNAL=BSDC1,INTRONIC;SVTYPE=SVA;SVLEN=896;MEINFO=SVA,420,1316,+;DIFF=0.08:n1-421,n424,n426,n428-433,n438-439,n441-442,n444,n446-448,n450,n454-457,n460,n466,t470g,a480g,a487t,a513g,a561c,t564c,c572a,a578g,t580c,t582c,a653g,c680t,n702-1316;LP=4;RP=1;RA=2;PRIOR=false;SR=6;AF=0.000150105;AC=1	.	.	.	0.000150105	.	.	.
1	32415387	ALU	TSD=null;ASSESS=3;INTERNAL=null,null;SVTYPE=ALU;SVLEN=279;MEINFO=AluSc,1,280,-;DIFF=0.98:c10t,t65g,g74a,g81a,g88t,c95t,c139t,c153g,a163g,g215a,g240a,c261t,g262a,g270a,g278a;LP=40;RP=42;RA=-0.07;PRIOR=false;SR=2;AF=0.0078125;AC=9	.	.	.	.	.	0.0078125	.
1	32433341	ALU	TSD=CAAGTCCCACTTTTCT;ASSESS=5;INTERNAL=null,null;SVTYPE=ALU;SVLEN=280;MEINFO=AluYa1_1,1,281,-;DIFF=1:g145a;LP=15;RP=11;RA=0.447;PRIOR=false;SR=14;AF=0.000199681;AC=1	0.000199681	.	.	.	.	.	.
1	32445909	ALU	TSD=TAACCTTTT;ASSESS=5;INTERNAL=null,null;SVTYPE=ALU;SVLEN=280;MEINFO=AluYa5,1,281,-;DIFF=1:t89c,g90a,c96a,g145a,c174t,g237c;LP=107;RP=97;RA=0.142;PRIOR=false;SR=127;AF=0.00501433;AC=7	0.00519169	0.00501433	.	0.0195137	.	.	.
1	32485051	ALU	TSD=null;ASSESS=3;INTERNAL=ZBTB8B,INTRONIC;SVTYPE=ALU;SVLEN=279;MEINFO=AluY,1,280,+;DIFF=0.7:d215-281;LP=7;RP=20;RA=-1.515;PRIOR=false;SR=13;AF=1.00735e-05;AC=1	.	.	.	.	.	.	1.00735e-05
1	32502404	ALU	TSD=CCACATTTATTCTTT;ASSESS=5;INTERNAL=null,null;SVTYPE=ALU;SVLEN=279;MEINFO=AluYb7_3,2,281,-;DIFF=1:c57t,c98a,t144c,g211a,c236t,c248g,i252gcagtcc,g253a,a252g;LP=121;RP=100;RA=0.275;PRIOR=false;SR=103;AF=0.00429799;AC=6	0.00419329	0.00429799	.	0.018613	.	0.00173611	.
1	32513797	ALU	TSD=null;ASSESS=4;INTERNAL=ZBTB8A,PROMOTER;SVTYPE=ALU;SVLEN=279;MEINFO=AluY,1,280,-;DIFF=0.63:c4t,c8t,c20t,c48t,c57t,g58a,c64t,t86g,t93c,c96t,c98t,c108a,c150t,g152t,c154t,g162a,g175a,g214a,g217a,g239a,d281;LP=11;RP=6;RA=0.874;PRIOR=false;SR=1;AF=0.00090063;AC=6	.	.	.	0.00090063	.	.	.
1	32513799	ALU	TSD=TTTTTTTTTTTTTTTT;ASSESS=5;INTERNAL=null,null;SVTYPE=ALU;SVLEN=279;MEINFO=AluSz,1,280,-;DIFF=0.98:c4t,c8t,g49a,c57t,i64c,t65g,t100c,c111t,i129a,g144a,c151t,g152a,c153g,a163g,c175t,c231t,c237t,g270c,c277g;LP=32;RP=58;RA=-0.858;PRIOR=false;SR=32;AF=0.00644699;AC=9	0.0145767	0.00644699	.	.	.	.	.
1	32513815	ALU	TSD=null;ASSESS=4;INTERNAL=null,null;SVTYPE=ALU;SVLEN=279;MEINFO=AluY,1,280,+;DIFF=1:g11a,c20t,c57t,g79a,c98t,g151a,c154t,g196c,g199t,g207a,c218a,g239a,g269a;LP=144;RP=94;RA=0.615;PRIOR=false;SR=13;AF=0.0243056;AC=28	.	.	.	.	.	0.0243056	.
1	32517496	ALU	TSD=CAAAAAAA;ASSESS=5;INTERNAL=null,null;SVTYPE=ALU;SVLEN=279;MEINFO=AluY,1,280,+;DIFF=0.88:c78t,c98t,g151a,c174a,c213t,c230t,c236t,t244a,c268t;LP=43;RP=61;RA=-0.504;PRIOR=false;SR=71;AF=0.0666933;AC=334	0.0666933	.	.	.	.	.	.
1	32567848	ALU	TSD=AAAACAAAACAAAACAAAAAAAA;ASSESS=5;INTERNAL=NR_111980,INTRONIC;SVTYPE=ALU;SVLEN=201;MEINFO=AluY,79,280,+;DIFF=0.58:g99a,c142t,c154t,g162a,g199t,g269a,c276t;LP=27;RP=71;RA=-1.395;PRIOR=false;SR=45;AF=0.00501433;AC=7;GENE=ZBTB8A	0.00339457	0.00501433	0.00314748	0.016391	.	0.00173611	.
1	32621982	ALU	TSD=AAAAAAAAAAAAAAAA;ASSESS=5;INTERNAL=NM_001308138,INTRONIC;SVTYPE=ALU;SVLEN=279;MEINFO=AluY,1,280,-;DIFF=0.99:c4t,c48t,g54a,g90a,c98t,g143a,g152t,c154t,c213t,g269a;LP=29;RP=41;RA=-0.5;PRIOR=false;SR=18;AF=0.0234375;AC=27	.	.	.	.	.	0.0234375	.
1	32631957	LINE1	TSD=null;ASSESS=3;INTERNAL=ZBTB8OS,INTRONIC;SVTYPE=LINE1;SVLEN=2350;MEINFO=L1Ambig,3668,6018,+;DIFF=0.03:n1-3667,n3744-6019;LP=7;RP=1;RA=2.807;ISTP=0;PRIOR=false;SR=2;AF=0.0169652;AC=1665	.	.	.	.	.	.	0.0169652
1	32642777	SVA	TSD=null;ASSESS=3;INTERNAL=ZBTB8OS,INTRONIC;SVTYPE=SVA;SVLEN=1236;MEINFO=SVA,79,1315,+;DIFF=0.03:n1-78,c103t,a105g,g110a,n114-1316;LP=1;RP=3;RA=-1.585;PRIOR=false;SR=14;AF=0.109126;AC=727	.	.	.	0.109126	.	.	.
1	32658361	ALU	TSD=null;ASSESS=3;INTERNAL=NM_001135256,INTRONIC;SVTYPE=ALU;SVLEN=279;MEINFO=AluY,1,280,+;DIFF=0.97:c4t,g9a,c48t,c98t,g139a,c150t,g155a,c174t,g199t,c236t,g277a;LP=65;RP=93;RA=-0.517;PRIOR=false;SR=20;AF=0.00173611;AC=2	.	.	.	.	.	0.00173611	.
1	32672757	ALU	TSD=null;ASSESS=4;INTERNAL=RBBP4,INTRONIC;SVTYPE=ALU;SVLEN=274;MEINFO=AluY,6,280,-;DIFF=0.92:c57t,c98t,c138t,g143a,g231a,c236t,g277a;LP=5;RP=16;RA=-1.678;PRIOR=false;SR=1;AF=0.000450315;AC=3	.	.	.	0.000450315	.	.	.
1	32680376	LINE1	TSD=TTTTTTTTTTTTTTTTTTT;ASSESS=5;INTERNAL=SYNC,3_UTR;SVTYPE=LINE1;SVLEN=5957;MEINFO=L1Ambig,61,6018,+;DIFF=0.08:n1-4977,a5006c,c5066t,a5092g,c5093a,g5097t,n5108-5400,g5465c,g5482t,n5510-5558,c5572t,g5586a,c5662t,g5686a,n5708-6019;LP=18;RP=8;RA=1.17;ISTP=0;PRIOR=false;SR=8;AF=0.00628589;AC=624	.	.	.	.	.	.	0.00628589
1	32719370	ALU	TSD=AAGAAATCCTTAGA;ASSESS=5;INTERNAL=null,null;SVTYPE=ALU;SVLEN=281;MEINFO=AluY,0,281,+;DIFF=0.98:g65a,a123c,g143a,c174t,g214a,g231a,c238t,g245a,c260t,g269a;LP=13;RP=5;RA=1.379;PRIOR=false;SR=16;AF=0.000199681;AC=1	0.000199681	.	.	.	.	.	.
1	32781568	ALU	TSD=AAAAAAAAAA;ASSESS=5;INTERNAL=YARS,INTRONIC;SVTYPE=ALU;SVLEN=281;MEINFO=AluYa4_3,0,281,+;DIFF=1:t89c,c96a,i119a,a161g,c174t,g237c;LP=13;RP=8;RA=0.7;PRIOR=false;SR=14;AF=0.000150105;AC=1	.	.	.	0.000150105	.	.	.
1	32837157	ALU	TSD=null;ASSESS=3;INTERNAL=NM_022753,INTRONIC;SVTYPE=ALU;SVLEN=279;MEINFO=AluY,1,280,+;DIFF=0.99:g5a,g9a,g54a,c57t,a76t,t89c,t93c,c98t,t118a,c138t,g199t,c218g,g237a,g269a,c276t;LP=125;RP=123;RA=0.023;PRIOR=false;SR=50;AF=0.0251736;AC=29	.	.	.	.	.	0.0251736	.
1	32867502	ALU	TSD=GAAGCTGAACCTCTTCT;ASSESS=5;INTERNAL=NM_001171941,INTRONIC;SVTYPE=ALU;SVLEN=271;MEINFO=AluYb8,10,281,-;DIFF=1:c57t,c64t,c98a,t144c,g211a,c236t,i252gcagtcc,c248g,a252g;LP=30;RP=27;RA=0.152;PRIOR=false;SR=33;AF=0.00143266;AC=2;GENE=FNDC5	0.000399361	0.00143266	.	.	.	.	.
1	32910144	SVA	TSD=GGTAATTATGATTTCTTT;ASSESS=5;INTERNAL=NM_033504,PROMOTER;SVTYPE=SVA;SVLEN=467;MEINFO=SVA,848,1315,-;DIFF=0.26:n1-847,t862c,t863c,g880c,t889c,g938a,c945a,t970c,t985c,c990t,g1009t,a1053g,g1067a,a1079g,c1129g,c1146a,c1163a,c1164t,t1267c,g1268a,g1310t;LP=12;RP=1;RA=3.585;PRIOR=false;SR=2;AF=0.000716332;AC=1	0.000199681	0.000716332	.	.	.	.	.
1	32914538	ALU	TSD=null;ASSESS=3;INTERNAL=TMEM54,PROMOTER;SVTYPE=ALU;SVLEN=279;MEINFO=AluY,1,280,+;DIFF=0.93:g9a,c20t,c57t,g99a,g100c,g110a,g139a,g143a,g152t,g153a,c154t,g162a,g175a,c206t,c260t,c268a,g277a;LP=3;RP=14;RA=-2.222;PRIOR=false;SR=1;AF=0.00044964;AC=1	.	.	0.00044964	.	.	.	.
1	32914560	ALU	TSD=TTTTTTTTTTTTTTTTTTTTTT;ASSESS=5;INTERNAL=null,null;SVTYPE=ALU;SVLEN=279;MEINFO=AluSz,1,280,+;DIFF=1:g9a,g11a,c20t,g21a,c53t,c57t,t65g,i129a,c153g,a163g,c197g,c207t,g219c,c237t,c239t,c277t;LP=24;RP=40;RA=-0.737;PRIOR=false;SR=12;AF=0.00520833;AC=6	.	.	.	0.00450315	.	0.00520833	.
1	32936733	ALU	TSD=null;ASSESS=3;INTERNAL=RNF19B,3_UTR;SVTYPE=ALU;SVLEN=279;MEINFO=AluY,1,280,+;DIFF=0.91:g11a,g54a,c57t,c106t,g143a,c218g,g237a;LP=21;RP=56;RA=-1.415;PRIOR=false;SR=3;AF=0.00040295;AC=40	.	.	.	.	.	.	0.00040295
1	32936750	LINE1	TSD=null;ASSESS=4;INTERNAL=RNF19B,3_UTR;SVTYPE=LINE1;SVLEN=3715;MEINFO=L1Ambig,2303,6018,-;DIFF=0.05:n1-3994,c4026t,g4033t,t4043a,n4049,n4071-4114,c4125t,a4194g,n4199-4349,c4374g,a4393c,n4426-4612,a4638c,n4654-4733,g4752c,c4762a,n4810-6019;LP=10;RP=9;RA=0.152;ISTP=0;PRIOR=false;SR=3;AF=0.000241765;AC=24	.	.	.	.	.	.	0.000241765
1	32938167	ALU	TSD=AAAAAAAAAAAAAAAAAAAAGAAAAAA;ASSESS=5;INTERNAL=NM_001300826,INTRONIC;SVTYPE=ALU;SVLEN=279;MEINFO=AluY,1,280,+;DIFF=1:g5a,g9a,c20t,c48t,c98t,c154t,g196c,g199t,c206t,c213t,c218g,c236t,g269a,g277a;LP=27;RP=41;RA=-0.603;PRIOR=false;SR=57;AF=0.111498;AC=128	.	.	0.00764388	.	.	0.111498	.
1	33018779	ALU	TSD=AGAAATCTCCACCACATC;ASSESS=5;INTERNAL=NR_037592,INTRONIC;SVTYPE=ALU;SVLEN=281;MEINFO=AluYa5b1,0,281,+;DIFF=1:t89c,c96a,i119a,g145a,a161g,c174t,g237c;LP=11;RP=15;RA=-0.447;PRIOR=false;SR=14;AF=0.000716332;AC=1;GENE=AK2	0.000199681	0.000716332	.	0.00030021	.	.	.
1	33020268	ALU	TSD=TCTTCCTCCATTTTCT;ASSESS=5;INTERNAL=AK2,INTRONIC;SVTYPE=ALU;SVLEN=280;MEINFO=AluYa5,1,281,-;DIFF=1:t89c,c96a,g145a,c174t,g237c;LP=47;RP=47;RA=0;PRIOR=false;SR=44;AF=0.000450315;AC=3	.	.	.	0.000450315	.	.	.
1	33034897	SVA	TSD=null;ASSESS=3;INTERNAL=NR_037592,INTRONIC;SVTYPE=SVA;SVLEN=844;MEINFO=SVA,471,1315,+;DIFF=0.38:n1-470,n474,n476-478,a487c,g488t,c489t,a496g,a513g,n558,a561c,t564c,g566c,a578g,t580c,t582c,g583a,g598c,t605a,g619a,n631,g632a,g636a,n646-664,a668g,g681a,t703a,g717a,t729c,g730a,g734a,c763t,g764c,a773g,c801g,a825g,a827g,a836g,a838g,g840t,n849,n868-898,t922g,g927c,a931g,a934t,g938a,c945a,g1009t,c1019…	.	0.000716332	.	.	.	.	.
1	33034914	SVA	TSD=AAAAATTAGCTGGGCAT;ASSESS=5;INTERNAL=NR_037592,INTRONIC;SVTYPE=SVA;SVLEN=875;MEINFO=SVA,441,1316,+;DIFF=0.27:n1-440,a487c,g488t,c489t,a496g,a513g,a561c,t564c,g566c,a578g,t580c,t582c,g583a,g598c,t605a,g619a,c631t,g632a,g636a,i640g,n646-664,a668g,g681a,g696c,g717a,g730a,g734a,c763t,g764c,a773g,c794t,a802c,c803g,n807-1316;LP=25;RP=1;RA=4.644;PRIOR=false;SR=11;AF=0.00173611;AC=2	0.000399361	.	.	0.00030021	.	0.00173611	.
1	33053495	ALU	TSD=null;ASSESS=4;INTERNAL=AK2,PROMOTER;SVTYPE=ALU;SVLEN=266;MEINFO=AluY,14,280,-;DIFF=0.15:c48a,c64t,g99a,c142t,c150t,g155a,g257c,g258a,c260t,g261a,c268t,g269a,c276t;LP=2;RP=5;RA=-1.322;PRIOR=false;SR=1;AF=0.00030021;AC=2	.	.	.	0.00030021	.	.	.
1	33059286	ALU	TSD=AATGAAAATGTTCA;ASSESS=5;INTERNAL=null,null;SVTYPE=ALU;SVLEN=275;MEINFO=AluYb,6,281,+;DIFF=1:c57t,c64t,c98a,t144c,g211a,c238t,t249a,c250g,g261a,a266t,c268t,c276t;LP=107;RP=124;RA=-0.213;PRIOR=false;SR=105;AF=0.00931232;AC=13	0.0125799	0.00931232	.	.	.	.	.
1	33064885	ALU	TSD=null;ASSESS=3;INTERNAL=null,null;SVTYPE=ALU;SVLEN=277;MEINFO=AluYb6_2,3,280,+;DIFF=0.97:c57t,c64t,c98a,t144c,g211a,c236t,c248g;LP=1;RP=9;RA=-3.17;PRIOR=false;SR=3;AF=0.000199681;AC=1	0.000199681	.	.	.	.	.	.
1	33101462	ALU	TSD=null;ASSESS=3;INTERNAL=NM_001301825,INTRONIC;SVTYPE=ALU;SVLEN=278;MEINFO=AluY,2,280,-;DIFF=0.98:g9c,g11a,g21a,g54a,c57t,c98t,g143a,c150t,g151a,g152c,g153a,c174t,g196c,g199t,c218g,g269a;LP=48;RP=74;RA=-0.624;PRIOR=false;SR=10;AF=0.126736;AC=146	.	.	.	.	.	0.126736	.
1	33128704	LINE1	TSD=CATTTTTGTAATTTT;ASSESS=5;INTERNAL=NM_001301825,TERMINATOR;SVTYPE=LINE1;SVLEN=6018;MEINFO=L1Ta1d,1,6019,-;DIFF=0.13:n1,t231c,t254a,c324a,n491-6019;LP=16;RP=16;RA=0;ISTP=0;PRIOR=false;SR=15;GENE=AZIN2;AF=0.000199681;AC=1	0.000199681	.	.	.	.	.	.
1	33180388	SVA	TSD=null;ASSESS=4;INTERNAL=NM_018207,INTRONIC;SVTYPE=SVA;SVLEN=1240;MEINFO=SVA,75,1315,-;DIFF=0.26:n1-871,g880c,a886g,g898a,c920g,t922g,a931g,a934t,g938a,c945a,g1009t,c1019t,a1053g,g1067a,a1079g,c1129g,c1157t,g1268a,t1292c;LP=12;RP=2;RA=2.585;PRIOR=false;SR=3;AF=0.000716332;AC=1;GENE=TRIM62	.	0.000716332	.	.	.	.	.
1	33195979	ALU	TSD=AAAACATGTACACGT;ASSESS=5;INTERNAL=null,null;SVTYPE=ALU;SVLEN=255;MEINFO=AluY,26,281,+;DIFF=1:g5a,c10t,g49a,g54a,c57t,g65a,c98t,g196c,g199t;LP=31;RP=22;RA=0.495;PRIOR=false;SR=6;AF=0.000868056;AC=1	0.000399361	.	.	.	.	0.000868056	.
1	33252384	ALU	TSD=AACAACAACAACAACAACAACAACAAC;ASSESS=5;INTERNAL=NM_152493,PROMOTER;SVTYPE=ALU;SVLEN=279;MEINFO=AluY,1,280,+;DIFF=1:c4t,c10t,c20t,c53t,c98t,g139a,c213t,c238t,g261a,g269a,g277a;LP=43;RP=50;RA=-0.218;PRIOR=false;SR=37;AF=0.000599042;AC=3	0.000599042	.	.	.	.	.	.
1	33305218	ALU	TSD=AGAAGTCTAGACAGCTG;ASSESS=5;INTERNAL=A3GALT2,TERMINATOR;SVTYPE=ALU;SVLEN=280;MEINFO=AluYc1,1,281,+;DIFF=1:g148a,a191g;LP=41;RP=16;RA=1.358;PRIOR=false;SR=26;AF=0.00030021;AC=2	.	.	.	0.00030021	.	.	.
1	33305999	ALU	TSD=TT;ASSESS=5;INTERNAL=NM_001080438,TERMINATOR;SVTYPE=ALU;SVLEN=279;MEINFO=AluY,1,280,+;DIFF=0.98:c57t,i65gt,a76t,t86g,t93c,c98t,g155a,g175a,g207a,c238t,g277a;LP=42;RP=61;RA=-0.538;PRIOR=false;SR=17;AF=0.00260417;AC=3	.	.	.	.	.	0.00260417	.
1	33308780	ALU	TSD=TTTTTTTTTTTTTTTTTTTTTTTTTTTTTT;ASSESS=5;INTERNAL=NM_001080438,INTRONIC;SVTYPE=ALU;SVLEN=278;MEINFO=AluSz,2,280,-;DIFF=0.95:g5a,c8t,c57t,d64-65,g74a,g75a,c80g,t100a,g112a,t120a,i129a,c153g,c155t,a163g,c197t,g219c,g238a,c239t,g240a,c244t,c261t;LP=17;RP=6;RA=1.503;PRIOR=false;SR=21;AF=0.0391986;AC=45	0.162939	.	0.0382194	0.212999	.	0.0391986	.
1	33317415	ALU	TSD=AGGTTGCTTTTTT;ASSESS=5;INTERNAL=NM_001080438,INTRONIC;SVTYPE=ALU;SVLEN=265;MEINFO=AluYa,16,281,-;DIFF=0.93:t89c,c96a,i119a,g145a,c174t,g237c;LP=14;RP=9;RA=0.637;PRIOR=false;SR=21;AF=0.000716332;AC=1;GENE=A3GALT2	0.000199681	0.000716332	.	.	.	.	.
1	33344078	ALU	TSD=AAGACAAATAA;ASSESS=5;INTERNAL=PHC2,INTRONIC;SVTYPE=ALU;SVLEN=281;MEINFO=AluYb8,0,281,+;DIFF=1:c57t,c64t,c98a,t144c,g211a,c236t,c248g,i252gcagtcc,g253a,a252g;LP=15;RP=12;RA=0.322;PRIOR=false;SR=12;AF=0.000150105;AC=1	.	.	.	0.000150105	.	.	.
1	33382555	ALU	TSD=AAGAACTAGAAGTCTG;ASSESS=5;INTERNAL=null,null;SVTYPE=ALU;SVLEN=281;MEINFO=AluYa5,0,281,+;DIFF=1:t89c,i94aa,c96a,g145a,c174t,g237c;LP=11;RP=7;RA=0.652;PRIOR=false;SR=9;AF=0.000199681;AC=1	0.000199681	.	.	.	.	.	.
1	33402093	ALU	TSD=null;ASSESS=4;INTERNAL=null,null;SVTYPE=ALU;SVLEN=279;MEINFO=AluY,1,280,-;DIFF=1:c53t,c174t,g237a,g269c;LP=32;RP=52;RA=-0.7;PRIOR=false;SR=7;AF=0.000716332;AC=1;GENE=PHC2	0.000399361	0.000716332	.	0.00105074	.	.	.
1	33411456	ALU	TSD=null;ASSESS=3;INTERNAL=null,null;SVTYPE=ALU;SVLEN=279;MEINFO=AluSz,1,280,+;DIFF=0.93:g49a,c57t,t65g,i129a,g156a,a163g,c197g,c214t,g219c,c231t,c237t,d276-282;LP=23;RP=48;RA=-1.061;PRIOR=false;SR=12;AF=0.0164931;AC=19	.	.	.	.	.	0.0164931	.
1	33494116	ALU	TSD=AAGAATCAAATTC;ASSESS=5;INTERNAL=ZSCAN20,INTRONIC;SVTYPE=ALU;SVLEN=281;MEINFO=AluYa5,0,281,+;DIFF=1:t89c,c96a,g145a,c174t,c213a,g237c,g258a;LP=22;RP=30;RA=-0.447;PRIOR=false;SR=44;AF=0.00030021;AC=2	.	.	.	0.00030021	.	.	.
1	33506465	ALU	TSD=GATTCCTGTTTTCTT;ASSESS=5;INTERNAL=CSMD2,TERMINATOR;SVTYPE=ALU;SVLEN=280;MEINFO=AluYa5,1,281,-;DIFF=1:g54a,t89c,c96a,c109t,g145a,c174t,g237c;LP=9;RP=11;RA=-0.29;PRIOR=false;SR=17;AF=0.000150105;AC=1	.	.	.	0.000150105	.	.	.
1	33777249	ALU	TSD=GCATTTGGCAAAGAGTTCT;ASSESS=5;INTERNAL=NM_052896,INTRONIC;SVTYPE=ALU;SVLEN=280;MEINFO=AluYa5,1,281,-;DIFF=1:t89c,c96a,g145a,c174t,g237c;LP=327;RP=364;RA=-0.155;PRIOR=false;SR=387;AF=0.0200573;AC=28;GENE=CSMD2	0.0171725	0.0200573	.	0.00165116	.	0.00347222	.
1	33814493	ALU	TSD=ATCTCCCCTTACTCTT;ASSESS=5;INTERNAL=NM_052896,INTRONIC;SVTYPE=ALU;SVLEN=280;MEINFO=AluYa5,1,281,-;DIFF=1:t89c,c96a,g145a,c174t,g237c;LP=74;RP=71;RA=0.06;PRIOR=false;SR=67;AF=0.00358166;AC=5;GENE=CSMD2	0.00179712	0.00358166	.	0.00105074	0.00793651	0.00260417	.
1	33853090	ALU	TSD=CTTCAACATTT;ASSESS=5;INTERNAL=NM_052896,INTRONIC;SVTYPE=ALU;SVLEN=279;MEINFO=AluYb11,2,281,-;DIFF=1:c57t,c64t,c98a,t144c,c174g,i201t,g211a,c236t,i252gcagtcc,c248g;LP=16;RP=14;RA=0.193;PRIOR=false;SR=22;AF=0.000199681;AC=1	0.000199681	.	.	.	.	.	.
1	33888786	ALU	TSD=TTGTTGTTGTTGTTGTTGTTGTTGTTGTTG;ASSESS=5;INTERNAL=NM_052896,INTRONIC;SVTYPE=ALU;SVLEN=261;MEINFO=AluY,19,280,+;DIFF=0.87:c48t,g49a,c53t,g65a,c78t,c98t,c107t,g199t,g261a,g277a;LP=30;RP=74;RA=-1.303;PRIOR=false;SR=302;AF=0.000199681;AC=1	0.000199681	.	.	.	.	.	.
1	33902378	ALU	TSD=GAAAAGCCCATTTTCT;ASSESS=5;INTERNAL=NM_052896,INTRONIC;SVTYPE=ALU;SVLEN=280;MEINFO=AluYk,1,281,-;DIFF=1:c57t,c64t,g99a,c142a,t144c,g155t,g207a,g224c,c255t,g269c,t274g,c276t;LP=9;RP=13;RA=-0.531;PRIOR=false;SR=8;AF=0.000199681;AC=1	0.000199681	.	.	.	.	.	.
1	33969423	ALU	TSD=TAGATCACATTTCT;ASSESS=5;INTERNAL=CSMD2,INTRONIC;SVTYPE=ALU;SVLEN=278;MEINFO=AluYa4_5,3,281,-;DIFF=1:t89c,c96a,g145a,c174t,c236t;LP=35;RP=24;RA=0.544;PRIOR=false;SR=39;AF=0.00030021;AC=2	.	.	.	0.00030021	.	.	.
1	34040546	LINE1	TSD=null;ASSESS=3;INTERNAL=NM_052896,INTRONIC;SVTYPE=LINE1;SVLEN=6016;MEINFO=L1Ta1d,3,6019,-;DIFF=0.05:n1-2,t231c,t254a,n349-6019;LP=1;RP=19;RA=-4.248;ISTP=-1;PRIOR=false;SR=11;AF=0.000868056;AC=1	.	.	.	.	.	0.000868056	.
1	34040560	LINE1	TSD=GCATGTGTATTTCT;ASSESS=5;INTERNAL=CSMD2,INTRONIC;SVTYPE=LINE1;SVLEN=6016;MEINFO=L1Ta1d,3,6019,-;DIFF=0.04:n1-2,t231c,t254a,n292-548,n551,n573,n582,n588,n593,n598,n645,n675-678,n686,n701-1015,t1023c,n1038-1040,n1170-6019;LP=1;RP=9;RA=-3.17;ISTP=0;PRIOR=false;SR=5;GENE=CSMD2;AF=0.00044964;AC=1	.	.	0.00044964	.	.	.	.
1	34076929	ALU	TSD=AAAAAAAAAAAAAAAAAAAA;ASSESS=5;INTERNAL=NM_052896,INTRONIC;SVTYPE=ALU;SVLEN=268;MEINFO=AluY,12,280,-;DIFF=0.93:g65a,c88t,g231a,c238t,g261a;LP=101;RP=60;RA=0.751;PRIOR=false;SR=124;AF=0.171326;AC=858	0.171326	.	.	.	.	.	.
1	34101772	ALU	TSD=TGTGTAATATAT;ASSESS=5;INTERNAL=NM_052896,INTRONIC;SVTYPE=ALU;SVLEN=280;MEINFO=AluYb8,1,281,-;DIFF=0.99:g5a,c8t,c57t,c64t,c98a,t144c,g211a,c236t,i252gcagtcc,c248g,a252g;LP=67;RP=60;RA=0.159;PRIOR=false;SR=30;AF=0.002149;AC=3;GENE=CSMD2	0.000798722	0.002149	.	0.00570399	.	.	.
1	34130410	ALU	TSD=null;ASSESS=4;INTERNAL=NM_052896,INTRONIC;SVTYPE=ALU;SVLEN=279;MEINFO=AluY,1,280,+;DIFF=0.95:g49a,c57t,i65gt,t86g,t93c,c98t,g110a,c138t,g143a,c236t,c238t,c260t,g269a,g277a;LP=29;RP=35;RA=-0.271;PRIOR=false;SR=6;AF=0.002149;AC=3;GENE=CSMD2	.	0.002149	.	.	.	.	.
1	34170745	ALU	TSD=GGCTTATCCACTTCT;ASSESS=5;INTERNAL=NM_032884,INTRONIC;SVTYPE=ALU;SVLEN=280;MEINFO=AluYa5,1,281,-;DIFF=1:t89c,c96a,g145a,c174t,a188g,g237c;LP=587;RP=660;RA=-0.169;PRIOR=false;SR=632;AF=0.0358166;AC=50;GENE=C1orf94	0.0211661	0.0358166	.	0.067097	0.00793651	0.00694444	.
1	34225100	SVA	TSD=null;ASSESS=3;INTERNAL=NM_001134734,TERMINATOR;SVTYPE=SVA;SVLEN=1240;MEINFO=SVA,75,1315,+;DIFF=0.28:n1-954,t985c,g1009t,t1029g,a1053g,g1067a,a1079g,c1163a,c1164t,t1267c,g1268a,a1280t,c1285t,g1310t;LP=2;RP=16;RA=-3;PRIOR=false;SR=3;AF=0.000199681;AC=1	0.000199681	.	.	.	.	.	.
1	34225132	SVA	TSD=null;ASSESS=0;INTERNAL=NM_001134734,TERMINATOR;SVTYPE=SVA;SVLEN=1240;MEINFO=SVA,75,1315,-;DIFF=0.21:n1-976,t985c,g1009t,t1029g,a1053g,g1067a,a1079g,n1132-1178,t1267c,g1268a,a1280t,c1285t,g1310t;LP=1;RP=7;RA=-2.807;PRIOR=false;SR=0;AF=0.000716332;AC=1	.	0.000716332	.	.	.	.	.
1	34256836	LINE1	TSD=AAATAAATAAATAAATAAATAAA;ASSESS=5;INTERNAL=null,null;SVTYPE=LINE1;SVLEN=3257;MEINFO=L1Ambig,2761,6018,+;DIFF=0.05:n1-5680,a5712g,c5744t,g5846t,t5850c,g5870t,c5878g,g5883t,a5929g,c5930a,a5931g,g6014a;LP=9;RP=51;RA=-2.503;ISTP=0;PRIOR=false;SR=14;AF=0.00173611;AC=2	.	.	0.00134892	.	.	0.00173611	.
1	34265370	ALU	TSD=AAAAATTTCTAGTTTA;ASSESS=5;INTERNAL=C1orf94,TERMINATOR;SVTYPE=ALU;SVLEN=54;MEINFO=AluY,227,281,+;DIFF=0.58:c4t,c8t,i64tg,c64g,a76t,g79a,c83t,t86g,t93c,c98t,c112t,c117a,a127c,g139a,g151a,g155a,t158a,g189a,c198t,g237c;LP=1;RP=7;RA=-2.807;PRIOR=false;SR=11;AF=0.000150105;AC=1	.	.	.	0.000150105	.	.	.
1	34303806	ALU	TSD=null;ASSESS=4;INTERNAL=C1orf94,TERMINATOR;SVTYPE=ALU;SVLEN=279;MEINFO=AluYe,1,280,-;DIFF=0.42:c16a,c48a,g49a,c57t,t61a,g67a,g79a,c109t,t144a,c150t,t163c;LP=4;RP=2;RA=1;PRIOR=false;SR=2;AF=0.00690691;AC=46	.	.	.	0.00690691	.	.	.
1	34352241	LINE1	TSD=dCCCTCAGTCCTT;ASSESS=5;INTERNAL=null,null;SVTYPE=LINE1;SVLEN=768;MEINFO=L1Ta,5250,6018,-;DIFF=0.11:n1-5249,n5745,n5752,n5757,n5780;LP=27;RP=20;RA=0.433;ISTP=0;PRIOR=false;SR=25;AF=0.000399361;AC=2	0.000399361	.	.	.	.	.	.
1	34401359	ALU	TSD=AGGGATGTATTTCTT;ASSESS=5;INTERNAL=C1orf94,TERMINATOR;SVTYPE=ALU;SVLEN=280;MEINFO=AluYa4_2,1,281,-;DIFF=1:t89c,c96a,g145a,g237c;LP=19;RP=10;RA=0.926;PRIOR=false;SR=14;AF=0.000150105;AC=1	.	.	.	0.000150105	.	.	.
1	34482646	LINE1	TSD=GAA;ASSESS=5;INTERNAL=null,null;SVTYPE=LINE1;SVLEN=809;MEINFO=L1Ambig,5210,6019,+;DIFF=0.12:n1-5207,n5923-5939;LP=39;RP=23;RA=0.762;ISTP=0;PRIOR=false;SR=34;GENE=LOC105378641;AF=0.000399361;AC=2	0.000399361	.	.	.	.	.	.
1	34544889	LINE1	TSD=null;ASSESS=4;INTERNAL=null,null;SVTYPE=LINE1;SVLEN=6017;MEINFO=L1Ambig,1,6018,-;DIFF=0.08:n1-5566,c5590t,a5712g,c5752g,a5865c,g5868t,c5878t,g5881t,g5903t,c5914a,n5919,n5923,n5928,n5930,n5933,n5935-5938,n5940-5944,n5946,g6014a;LP=8;RP=14;RA=-0.807;ISTP=0;PRIOR=false;SR=6;AF=0.000716332;AC=1;GENE=LOC105378641	0.000199681	0.000716332	.	.	.	.	.
1	34555678	ALU	TSD=AAGAAAATGTGGT;ASSESS=5;INTERNAL=MIR552,TERMINATOR;SVTYPE=ALU;SVLEN=281;MEINFO=AluYb8,0,281,+;DIFF=1:c57t,c64t,c98a,t144c,g211a,c236t,c248g,i252gcagtcc,g253a,a252g;LP=16;RP=37;RA=-1.209;PRIOR=false;SR=29;AF=0.00030021;AC=2	.	.	.	0.00030021	.	.	.
1	34583002	LINE1	TSD=AAAAAAAAAA;ASSESS=5;INTERNAL=null,null;SVTYPE=LINE1;SVLEN=6019;MEINFO=L1Ta1d,0,6019,+;DIFF=0.12:n1-3,t82g,g167a,t231c,t254a,t290g,n539,n553-6019;LP=180;RP=148;RA=0.282;ISTP=0;PRIOR=false;SR=97;GENE=LOC105378641;AF=0.0399361;AC=200	0.0399361	.	.	0.0694987	.	.	.
1	34604605	ALU	TSD=TAGAAACACTTTTTTT;ASSESS=5;INTERNAL=null,null;SVTYPE=ALU;SVLEN=280;MEINFO=AluYa3_4,1,281,-;DIFF=1:c98t,g145a,c174t,a188g,g237c;LP=42;RP=48;RA=-0.193;PRIOR=false;SR=16;AF=0.000199681;AC=1	0.000199681	.	.	.	.	.	.
1	34714654	LINE1	TSD=AAATTTCT;ASSESS=5;INTERNAL=null,null;SVTYPE=LINE1;SVLEN=334;MEINFO=L1Ambig,5685,6019,-;DIFF=0.06:n1-5684,a5931g;LP=8;RP=5;RA=0.678;ISTP=0;PRIOR=false;SR=17;GENE=LOC105378642;AF=0.000199681;AC=1	0.000199681	.	.	.	.	.	.
1	34802226	ALU	TSD=null;ASSESS=3;INTERNAL=NM_002060,TERMINATOR;SVTYPE=ALU;SVLEN=279;MEINFO=AluY,1,280,+;DIFF=0.99:c4t,c20t,g199a,c206t,g214a,g237a,c260t,c268t;LP=34;RP=117;RA=-1.783;PRIOR=false;SR=15;AF=0.00347222;AC=4	.	.	0.00044964	.	.	0.00347222	.
1	34834055	ALU	TSD=null;ASSESS=4;INTERNAL=SMIM12,TERMINATOR;SVTYPE=ALU;SVLEN=279;MEINFO=AluY,1,280,-;DIFF=0.89:g5t,g34a,c48t,g49a,c53t,g58a,t61a,c70t,a76t,g79a,t86a,g91a,c98t,t101a,g110a,g145a,g146a,g151a,c174t,g207a,g209a,g231a,c236t,g261a,g265a,g277a;LP=6;RP=4;RA=0.585;PRIOR=false;SR=3;AF=0.000450315;AC=3	.	.	.	0.000450315	.	.	.
1	34899947	ALU	TSD=null;ASSESS=1;INTERNAL=DLGAP3,INTRONIC;SVTYPE=ALU;SVLEN=268;MEINFO=AluY,12,280,-;DIFF=0.8:c20t,c48t,c53t,i65gt,a76t,g79a,c98t,c126t,g139a,g143a,c154t,t225c,c238t;LP=5;RP=10;RA=-1;PRIOR=false;SR=0;AF=2.05162e-05;AC=2	.	.	.	.	.	.	2.05162e-05
1	34932859	ALU	TSD=AAAAAAAAAAAAAAAA;ASSESS=5;INTERNAL=null,null;SVTYPE=ALU;SVLEN=279;MEINFO=AluY,1,280,+;DIFF=0.97:c4t,c53t,g58a,t93c,c98t,g110a,g151a,g152c,c154t,g162a,g199t,c206t,c213t,g231a,c238t,g239a,c260t,g261a;LP=32;RP=90;RA=-1.492;PRIOR=false;SR=9;AF=0.000399361;AC=2	0.000399361	.	.	0.00570399	.	.	.
1	34937072	ALU	TSD=ATAAACTATCTTTA;ASSESS=5;INTERNAL=null,null;SVTYPE=ALU;SVLEN=279;MEINFO=AluYg,2,281,-;DIFF=1:g143a,g152c,c154t,t173a,g175a,c229t;LP=39;RP=54;RA=-0.469;PRIOR=false;SR=18;AF=0.000199681;AC=1	0.000199681	.	.	.	.	.	.
1	34942283	ALU	TSD=AGAAAAAGAATTCTTTCTT;ASSESS=5;INTERNAL=null,null;SVTYPE=ALU;SVLEN=281;MEINFO=AluYc1,0,281,-;DIFF=1:g143a,g148a;LP=17;RP=8;RA=1.087;PRIOR=false;SR=10;AF=0.000716332;AC=1	0.000199681	0.000716332	.	.	.	.	.
1	34957807	ALU	TSD=null;ASSESS=3;INTERNAL=LOC653160,TERMINATOR;SVTYPE=ALU;SVLEN=269;MEINFO=AluY,11,280,+;DIFF=0:g21a,c48t,c57t,g73a,a76t,c78t,c98t,t101c,g102a,c213t,g228a,c230t,c236t,g269a,c276t;LP=2;RP=1;RA=1;PRIOR=false;SR=1;AF=0.000150105;AC=1	.	.	.	0.000150105	.	.	.
1	34965303	ALU	TSD=null;ASSESS=4;INTERNAL=LOC653160,TERMINATOR;SVTYPE=ALU;SVLEN=279;MEINFO=AluY,1,280,-;DIFF=1:g5a,c20t,g49a,c53t,c57t,t93c,c98t,c138t,g196c,g199t,g207a,g214a,c218g,g237a,c268t,c276t;LP=15;RP=11;RA=0.447;PRIOR=false;SR=4;AF=0.000899281;AC=2	.	.	0.000899281	.	.	.	.
1	34966187	SVA	TSD=AAGAATTATC;ASSESS=5;INTERNAL=NR_037869,TERMINATOR;SVTYPE=SVA;SVLEN=867;MEINFO=SVA,449,1316,+;DIFF=0.27:n1-406,n414,n420-421,n429,a487c,a513g,a561c,t564c,a578g,t580c,t582c,n597,a607g,a653g,a668g,i703ggt,t703c,c704a,a705g,g706c,g717a,g764c,a773g,n800-1316;LP=15;RP=1;RA=3.907;PRIOR=false;SR=5;AF=0.000716332;AC=1	0.000199681	0.000716332	.	.	.	.	.
1	34992153	ALU	TSD=null;ASSESS=3;INTERNAL=ZMYM6,INTRONIC;SVTYPE=ALU;SVLEN=280;MEINFO=AluY,1,281,-;DIFF=0.44:NoDifferences;LP=1;RP=8;RA=-3;PRIOR=false;SR=9;AF=2.01507e-05;AC=2	.	.	.	.	.	.	2.01507e-05
1	34992657	ALU	TSD=AAAAATATATTTATA;ASSESS=5;INTERNAL=NM_007167,INTRONIC;SVTYPE=ALU;SVLEN=149;MEINFO=AluY,132,281,+;DIFF=0.71:c4t,c8t,c10t,c35t,c48t,g52a,c53t,g75t,a76t,c78t,t86g,g91a,t93c,c98t,c107t,g148a;LP=23;RP=69;RA=-1.585;PRIOR=false;SR=39;AF=0.000599042;AC=3	0.000599042	.	.	.	.	.	.
1	34998640	ALU	TSD=AAGAAGTAGGGATCAC;ASSESS=5;INTERNAL=NM_007167,INTRONIC;SVTYPE=ALU;SVLEN=281;MEINFO=AluYc1,0,281,+;DIFF=1:g5a,c8t,g148a;LP=31;RP=30;RA=0.047;PRIOR=false;SR=15;AF=0.000716332;AC=1;GENE=ZMYM6	0.00139776	0.000716332	.	0.00330231	.	0.000868056	.
1	35005651	ALU	TSD=AAAAAAAAAAAAAAAAAAAAAA;ASSESS=5;INTERNAL=NM_007167,INTRONIC;SVTYPE=ALU;SVLEN=279;MEINFO=AluY,1,280,-;DIFF=1:g5a,c10t,c20t,i65gt,a76t,g79a,t86g,t93c,c98t,g207a,g231a,g269a,c276t;LP=57;RP=60;RA=-0.074;PRIOR=false;SR=24;AF=0.00868056;AC=10	.	.	.	.	.	0.00868056	.
1	35029475	ALU	TSD=ACACACTCTT;ASSESS=5;INTERNAL=NM_007167,INTRONIC;SVTYPE=ALU;SVLEN=276;MEINFO=AluY,5,281,-;DIFF=0.99:c57t,t93c,c98t,g207a,c213t,c230t,g231a,c236t,g239t,c241a,c260t,g261a,c268t,c276t;LP=43;RP=98;RA=-1.188;PRIOR=false;SR=12;AF=0.000399361;AC=2	0.000399361	.	.	0.000750525	.	.	.
1	35050363	LINE1	TSD=TTTTTTTTTTTTTTTT;ASSESS=5;INTERNAL=ZMYM1,PROMOTER;SVTYPE=LINE1;SVLEN=2392;MEINFO=L1Ambig,3626,6018,-;DIFF=0:n1-3625,n3630,n3632,n3649,n3658,n3660,n3679,g3695t,g3707t,t3714c,c3718t,n3730,n3741,t3744g,g3754a,c3762a,n3765,n3777-3924,c3944t,c3954t,g3984a,c3996a,g4019a,a4042t,n4066-6019;LP=2;RP=1;RA=1;ISTP=0;PRIOR=false;SR=5;AF=0.00270189;AC=18	.	.	.	0.00270189	.	.	.
1	35102227	SVA	TSD=null;ASSESS=3;INTERNAL=NM_024772,INTRONIC;SVTYPE=SVA;SVLEN=873;MEINFO=SVA,443,1316,-;DIFF=0.25:n1-434,g471t,a487c,n513-565,n568-569,n571,n573,n577-578,t580c,t582c,n583,n586,n588,g598t,n600,n603,g627t,a653g,a668g,i713g,t729c,g764c,a773g,g840c,t847g,t862c,t863a,g880c,n935-1316;LP=1;RP=15;RA=-3.907;PRIOR=false;SR=6;AF=0.000868056;AC=1	.	.	.	.	.	0.000868056	.
1	35102242	SVA	TSD=AAGTGGTAGTTTCTT;ASSESS=5;INTERNAL=NM_024772,INTRONIC;SVTYPE=SVA;SVLEN=881;MEINFO=SVA,435,1316,-;DIFF=0.42:n1-410,g422t,i478gt,t478c,c479a,a480g,g481c,a487t,a513g,a561c,t564c,n571-610,n615-616,n624,c630a,n631,n633,n637,n644,n646,g647t,g650t,n653-653,a668g,i703gt,t703c,c704a,a705g,g706c,c712g,t729c,g764c,a773g,g840c,t847g,t862c,t863a,g880c,g938a,c945a,t970c,t985c,g1009t,a1053g,g1067a,a1079g,g10…	0.00559105	0.002149	.	0.00105074	.	.	.
1	35102242	ALU	TSD=AAGTGGTAGTTTCTT;ASSESS=5;INTERNAL=NM_024772,INTRONIC;SVTYPE=ALU;SVLEN=184;MEINFO=AluSp,97,281,-;DIFF=0.97:g9a,c22a,t39g,g43c,g49a,c53t,g58a,t65g,g70a,g81a,g93a,t100c,t103a,c128a,c139t,c151t,g154a,c155t,c175t,c197t,g208a,g215a,c223t,a224t,c231t,c237t,c244t,g262a,g272a,i127a;LP=31;RP=13;RA=1.254;PRIOR=false;SR=33;AF=0.00339457;AC=17	0.00339457	.	.	.	.	.	.
1	35111526	ALU	TSD=AAAAGGACTGGGA;ASSESS=5;INTERNAL=ZMYM1,INTRONIC;SVTYPE=ALU;SVLEN=281;MEINFO=AluYa5b1,0,281,+;DIFF=1:t89c,c96a,i119a,g145a,a161g,c174t,g237c;LP=16;RP=30;RA=-0.907;PRIOR=false;SR=19;AF=0.00030021;AC=2	.	.	.	0.00030021	.	.	.
1	35132196	SVA	TSD=null;ASSESS=3;INTERNAL=ZMYM1,TERMINATOR;SVTYPE=SVA;SVLEN=1162;MEINFO=SVA,153,1315,+;DIFF=0.43:n1-152,t162c,a167g,c168g,g174a,g178a,t182a,t202g,a231g,i246cga,c253t,t258g,g271t,g322a,t324c,a327g,c346t,g362a,t366c,c386t,a395g,t405c,g406c,g417a,n470-905,g938a,c945a,t970c,t985c,g1009t,a1053g,g1067a,a1079g,c1129g,c1146a,c1163a,c1164t,a1246c,t1267c,g1268a,g1310t;LP=11;RP=15;RA=-0.447;PRIOR=false;SR=…	.	.	.	0.000150105	.	.	.
1	35135107	ALU	TSD=AAGCATGATTAGGTTTT;ASSESS=5;INTERNAL=null,null;SVTYPE=ALU;SVLEN=280;MEINFO=AluYb8,1,281,-;DIFF=1:c57t,c64t,c98a,t144c,g211a,c236t,c248g,i252gcagtcc,a252g,i127a;LP=34;RP=37;RA=-0.122;PRIOR=false;SR=52;AF=0.000599042;AC=3	0.000599042	.	.	.	.	.	.
1	35143527	ALU	TSD=AAATCTTGTACTATTTC;ASSESS=5;INTERNAL=null,null;SVTYPE=ALU;SVLEN=281;MEINFO=AluYa5a2,0,281,+;DIFF=1:g72a,t89c,c96a,g145a,c174t,g237c,i133a;LP=118;RP=77;RA=0.616;PRIOR=false;SR=97;AF=0.00119808;AC=6	0.00119808	.	.	.	.	.	.
1	35143776	ALU	TSD=CTCCTGTTTAAGTTTCTT;ASSESS=5;INTERNAL=null,null;SVTYPE=ALU;SVLEN=279;MEINFO=AluYb8,2,281,-;DIFF=1:c57t,c64t,c98a,t144c,g211a,c236t,i252gcagtcc,c248g,a252g;LP=9;RP=16;RA=-0.83;PRIOR=false;SR=16;AF=0.000716332;AC=1;GENE=LOC105378644	.	0.000716332	.	.	.	.	.
1	35150660	ALU	TSD=dATATATATATATA;ASSESS=5;INTERNAL=null,null;SVTYPE=ALU;SVLEN=279;MEINFO=AluY,1,280,+;DIFF=0.99:c8t,c57t,t86g,c98t,g143a,g162a,c268t;LP=16;RP=32;RA=-1;PRIOR=false;SR=24;AF=0.0222063;AC=31	.	0.0222063	.	.	.	.	.
1	35178901	ALU	TSD=AAAAAAAAAAAAAAAAA;ASSESS=5;INTERNAL=SFPQ,INTRONIC;SVTYPE=ALU;SVLEN=279;MEINFO=AluY,1,280,+;DIFF=0.99:g5a,g11a,c20t,g49a,g54a,c78t,c218g,c268t,c276t;LP=33;RP=57;RA=-0.788;PRIOR=false;SR=34;AF=5.03697e-05;AC=5	.	.	.	.	.	.	5.03697e-05
1	35180603	ALU	TSD=null;ASSESS=3;INTERNAL=SFPQ,INTRONIC;SVTYPE=ALU;SVLEN=279;MEINFO=AluYa1_2,1,280,+;DIFF=1:i65gt,a76t,c78t,t86g,g199t,c218g,g237c;LP=17;RP=27;RA=-0.667;PRIOR=false;SR=7;AF=1.00737e-05;AC=1	.	.	.	.	.	.	1.00737e-05
1	35184166	ALU	TSD=AAAAAAAAAAAAA;ASSESS=5;INTERNAL=SFPQ,3_UTR;SVTYPE=ALU;SVLEN=60;MEINFO=AluSg,221,281,+;DIFF=0.91:g9a,g49a,c53a,d65-66,g70a,g81a,i129a,c139t,g152a,c153g,c197g,t200a,c207t,c214t,g219c,c231t,g232a,c239t,t257a,d272-282;LP=94;RP=196;RA=-1.06;PRIOR=false;SR=15;AF=1.00737e-05;AC=1	.	.	.	.	.	.	1.00737e-05
1	35185121	ALU	TSD=GCAGAAATCTT;ASSESS=5;INTERNAL=NM_005066,INTRONIC;SVTYPE=ALU;SVLEN=280;MEINFO=AluY,1,281,-;DIFF=0.96:c98t,g110a,c126t,g143c,c154t,a264c,g265t,a252g;LP=14;RP=35;RA=-1.322;PRIOR=false;SR=21;AF=0.000399361;AC=2	0.000399361	.	.	0.00030021	.	.	.
1	35247709	ALU	TSD=TTTTTTTTTTTTTTTTTTTTTTTTTTTT;ASSESS=5;INTERNAL=ZMYM4,PROMOTER;SVTYPE=ALU;SVLEN=279;MEINFO=AluY,1,280,-;DIFF=0.69:g11a,c48t,i65gt,t86g,c98t,c150t,g196t,g199t,g214a,c218g,c230a,t244a,g261a,c268g,c276t;LP=20;RP=15;RA=0.415;PRIOR=false;SR=21;AF=0.111528;AC=743	.	.	.	0.111528	.	.	.
1	35252169	ALU	TSD=null;ASSESS=4;INTERNAL=ZMYM4,PROMOTER;SVTYPE=ALU;SVLEN=279;MEINFO=AluY,1,280,+;DIFF=0.97:g21a,c174t,i127a;LP=7;RP=33;RA=-2.237;PRIOR=false;SR=5;AF=0.000150105;AC=1	.	.	.	0.000150105	.	.	.
1	35274772	ALU	TSD=AAGTGCCAGTCATTTTTCT;ASSESS=5;INTERNAL=NM_005095,INTRONIC;SVTYPE=ALU;SVLEN=279;MEINFO=AluYg5b3,2,281,-;DIFF=0.96:g52a,a94g,g143a,g152c,c174t,c229t,t244a,a247g,g271a;LP=10;RP=18;RA=-0.848;PRIOR=false;SR=19;GENE=ZMYM4;AF=0.00793651;AC=1	.	.	.	0.00630631	0.00793651	.	.
1	35287234	ALU	TSD=TTTTTTTTTTTTTTTT;ASSESS=5;INTERNAL=NM_005095,INTRONIC;SVTYPE=ALU;SVLEN=279;MEINFO=AluY,1,280,-;DIFF=0.98:c53t,g58a,c98t,g143a,c150t,g155a,g197a,g199t,g207a,c218g,c238t,c268t,g269a,c273t,c276t;LP=69;RP=52;RA=0.408;PRIOR=false;SR=23;AF=0.0078125;AC=9	.	.	.	0.00030021	.	0.0078125	.
1	35292282	SVA	TSD=CAGTATGGGAGTTTT;ASSESS=5;INTERNAL=NM_005095,INTRONIC;SVTYPE=SVA;SVLEN=751;MEINFO=SVA,565,1316,-;DIFF=0.48:n1-668,g691a,a692t,t729c,g730a,c750t,g758a,g764c,a773g,c801g,a825g,a827g,a836g,a838g,g840t,g880c,a886g,g898a,g910a,t922g,c925t,a931g,a934t,g938a,c945a,g1009t,c1019t,a1053g,g1067a,a1079g,c1129g,t1131c,c1157t,g1268a,t1292c;LP=17;RP=27;RA=-0.667;PRIOR=false;SR=23;AF=0.000716332;AC=1;GENE=ZMY…	0.000199681	0.000716332	.	.	.	.	.
1	35299049	ALU	TSD=TTTTTTTTTTTTTTTTTT;ASSESS=5;INTERNAL=NM_005095,INTRONIC;SVTYPE=ALU;SVLEN=279;MEINFO=AluSz,1,280,+;DIFF=1:g5a,c10t,c20t,c48t,g54a,c57t,g58a,t65g,i129a,g144a,g149a,c151t,g152a,c153g,g156a,g208a,g215a,g240a,g262a,g278a;LP=56;RP=97;RA=-0.793;PRIOR=false;SR=5;AF=0.000868056;AC=1	.	.	.	.	.	0.000868056	.
1	35314681	ALU	TSD=TTTTTTTTTTTTTTTTT;ASSESS=5;INTERNAL=NM_005095,INTRONIC;SVTYPE=ALU;SVLEN=279;MEINFO=AluSz,1,280,+;DIFF=0.99:g54a,t65g,i129a,c153g,c155t,c197g,t200g,g262a,g266a,g270a,c277t;LP=19;RP=38;RA=-1;PRIOR=false;SR=156;AF=0.232808;AC=325;GENE=ZMYM4	0.341653	0.232808	0.376349	0.446563	.	0.404514	.
1	35328120	LINE1	TSD=CAGTAAAAACATTCTT;ASSESS=5;INTERNAL=NM_005095,INTRONIC;SVTYPE=LINE1;SVLEN=6017;MEINFO=L1Ta,2,6019,-;DIFF=0.12:n1-5591,n5913;LP=10;RP=22;RA=-1.138;ISTP=0;PRIOR=false;SR=16;AF=0.000716332;AC=1;GENE=ZMYM4	0.000199681	0.000716332	.	.	.	.	.
1	35370367	ALU	TSD=null;ASSESS=4;INTERNAL=ZMYM4,INTRONIC;SVTYPE=ALU;SVLEN=279;MEINFO=AluY,1,280,+;DIFF=0.97:c4t,c20t,c57t,i65gt,g91a,c138t,g175c,g196t,g199t;LP=87;RP=58;RA=0.585;PRIOR=false;SR=206;AF=0.072197;AC=7167	.	.	.	.	.	.	0.072197
1	35370749	ALU	TSD=TTTTTTTTTTTTTTTTTTTTTT;ASSESS=5;INTERNAL=ZMYM4,INTRONIC;SVTYPE=ALU;SVLEN=279;MEINFO=AluY,1,280,-;DIFF=1:g9a,g11a,g21a,c22t,c53t,c57t,c98t,g139a,g151a,g155a,g199a,g237a,g239a,g261a,c268t;LP=10;RP=13;RA=-0.379;PRIOR=false;SR=14;AF=0.0559892;AC=373	.	.	.	0.0559892	.	.	.
1	35382312	ALU	TSD=TACTATTTGTTTT;ASSESS=5;INTERNAL=NM_005095,INTRONIC;SVTYPE=ALU;SVLEN=280;MEINFO=AluYa4_2,1,281,-;DIFF=0.99:g9a,t89c,c96a,g145a,g237c,c260t;LP=86;RP=97;RA=-0.174;PRIOR=false;SR=72;AF=0.00501433;AC=7;GENE=ZMYM4	0.00299521	0.00501433	.	0.00555389	.	0.000868056	.
1	35397575	ALU	TSD=AAAAGTAAAGAAAGA;ASSESS=5;INTERNAL=NM_005095,INTRONIC;SVTYPE=ALU;SVLEN=281;MEINFO=AluYa5,0,281,+;DIFF=1:t86c,t89c,c96a,c98t,g145a,c174t,g237c;LP=8;RP=8;RA=0;PRIOR=false;SR=8;AF=0.000868056;AC=1	.	.	.	.	.	0.000868056	.
1	35402836	ALU	TSD=null;ASSESS=4;INTERNAL=NM_005095,INTRONIC;SVTYPE=ALU;SVLEN=167;MEINFO=AluSg,114,281,+;DIFF=0.99:c4t,c8t,c20t,g21a,c48t,c53t,c57t,d65-66,i129a,g140a,c153g,c155t,a163g,c197g,g215a,c237t,c239t,g262a,g278a;LP=36;RP=52;RA=-0.531;PRIOR=false;SR=3;AF=0.00520833;AC=6	0.0071885	.	.	.	.	0.00520833	.
1	35405018	SVA	TSD=null;ASSESS=4;INTERNAL=NM_005095,INTRONIC;SVTYPE=SVA;SVLEN=518;MEINFO=SVA,797,1315,-;DIFF=0.26:n1-796,c801g,a825g,a827g,a836g,a838g,g840t,g880c,a886g,g898a,c920g,t922g,a931g,a934t,g938a,c945a,g1009t,c1019t,a1053g,g1067a,a1079g,c1129g,c1157t,g1268a,t1292c;LP=15;RP=1;RA=3.907;PRIOR=false;SR=6;AF=0.000716332;AC=1;GENE=ZMYM4	0.000199681	0.000716332	.	.	.	.	.
1	35447256	ALU	TSD=AAAAAAAAAAAAAAAAAAA;ASSESS=5;INTERNAL=NM_024874,INTRONIC;SVTYPE=ALU;SVLEN=281;MEINFO=AluYc1,0,281,+;DIFF=1:g148a;LP=15;RP=12;RA=0.322;PRIOR=false;SR=9;AF=0.000199681;AC=1	0.000199681	.	.	.	.	.	.
1	35479972	ALU	TSD=AAAAAAAAAAAAAAAAAAAAAAAAA;ASSESS=5;INTERNAL=NM_024874,INTRONIC;SVTYPE=ALU;SVLEN=279;MEINFO=AluY,1,280,-;DIFF=0.98:c8t,c10t,c64t,c98t,g175a,g237a;LP=51;RP=40;RA=0.35;PRIOR=false;SR=51;AF=0.121528;AC=140	.	.	.	.	.	0.121528	.
1	35481842	SVA	TSD=TTTTTTTTTTTTTTTTTTTTTTTTTTTT;ASSESS=5;INTERNAL=KIAA0319L,INTRONIC;SVTYPE=SVA;SVLEN=1236;MEINFO=SVA,79,1315,-;DIFF=0.02:n1-79,c103t,a105g,g110a,n114-1316;LP=2;RP=4;RA=-1;PRIOR=false;SR=10;AF=0.00195137;AC=13	.	.	.	0.00195137	.	.	.
1	35495880	ALU	TSD=AAAAAAAAAAAAAAAAA;ASSESS=5;INTERNAL=NM_024874,INTRONIC;SVTYPE=ALU;SVLEN=279;MEINFO=AluY,1,280,+;DIFF=1:g11a,c57t,a76t,t86g,t93c,c98t,g151a,c154t,g199a,g277a;LP=56;RP=63;RA=-0.17;PRIOR=false;SR=25;AF=0.00179712;AC=9	0.00179712	.	.	.	.	.	.
1	35512344	ALU	TSD=AAAAAAAAAAAAAA;ASSESS=5;INTERNAL=NM_024874,INTRONIC;SVTYPE=ALU;SVLEN=279;MEINFO=AluSz,1,280,-;DIFF=0.98:c20t,t65g,g81a,c95t,i129a,c153g,a163g,g219c,c269t,c277t;LP=61;RP=72;RA=-0.239;PRIOR=false;SR=44;AF=0.0850694;AC=98	.	.	.	.	.	0.0850694	.
1	35584090	SVA	TSD=null;ASSESS=4;INTERNAL=NM_178548,INTRONIC;SVTYPE=SVA;SVLEN=1240;MEINFO=SVA,75,1315,-;DIFF=0.44:n1-858,t862c,g880c,a895g,g938a,c945a,t970c,t985c,g1009t,a1053g,g1067a,a1079g,c1129g,c1146a,c1163a,c1164t,t1267c,g1268a,g1310t;LP=18;RP=6;RA=1.585;PRIOR=false;SR=12;AF=0.000716332;AC=1;GENE=TFAP2E	0.000199681	0.000716332	.	.	.	.	.
1	35593916	ALU	TSD=AATAGTATAGACTTG;ASSESS=5;INTERNAL=TFAP2E,INTRONIC;SVTYPE=ALU;SVLEN=280;MEINFO=AluYc1,1,281,+;DIFF=1:g148a;LP=22;RP=24;RA=-0.126;PRIOR=false;SR=21;AF=0.00030021;AC=2	.	.	.	0.00030021	.	.	.
1	35625603	SVA	TSD=dTAC;ASSESS=5;INTERNAL=NM_002794,INTRONIC;SVTYPE=SVA;SVLEN=1240;MEINFO=SVA,75,1315,-;DIFF=0.37:n1-945,g1009t,c1019t,a1053g,g1067a,a1079g,c1129g,c1157t,i1185aaggcc,g1268a,t1292c;LP=45;RP=59;RA=-0.391;PRIOR=false;SR=18;AF=0.00286533;AC=4;GENE=PSMB2	.	0.00286533	.	.	.	.	.
1	35625606	SVA	TSD=null;ASSESS=3;INTERNAL=NM_002794,INTRONIC;SVTYPE=SVA;SVLEN=1240;MEINFO=SVA,75,1315,+;DIFF=0.45:n1-880,a886g,g898a,t922g,g927c,a931g,a934t,g938a,c945a,g1009t,c1019t,a1053g,g1067a,a1079g,c1129g,c1157t,i1185aggcca,g1268a,t1292c;LP=55;RP=76;RA=-0.467;PRIOR=false;SR=14;GENE=PSMB2;AF=0.000998403;AC=5	0.000998403	.	.	0.00210147	.	.	.
1	35701595	ALU	TSD=TCTCTCTCTCTCTCTCTCTCTCTCTCTCTCT;ASSESS=5;INTERNAL=null,null;SVTYPE=ALU;SVLEN=193;MEINFO=AluY,88,281,-;DIFF=0.9:c4t,c53t,c57t,t93c,c98t,g162a,c218g,c230t,c243t;LP=26;RP=37;RA=-0.509;PRIOR=false;SR=24;AF=0.000868056;AC=1	.	.	.	.	.	0.000868056	.
1	35730023	SVA	TSD=AGAAAGCTCCTCTGTA;ASSESS=5;INTERNAL=CLSPN,INTRONIC;SVTYPE=SVA;SVLEN=536;MEINFO=SVA,780,1316,+;DIFF=0.21:n1-432,c438t,a480g,i482c,a487t,a513g,a561c,t564c,a578g,t580c,t582c,g647t,n651-655,c663t,a668g,a705g,t729c,g743a,g748c,g764c,a773g,n800-1316;LP=17;RP=1;RA=4.087;PRIOR=false;SR=4;AF=0.000150105;AC=1	.	.	.	0.000150105	.	.	.
1	35733330	ALU	TSD=TTTTTTTTTT;ASSESS=5;INTERNAL=CLSPN,3_UTR;SVTYPE=ALU;SVLEN=273;MEINFO=AluY,7,280,-;DIFF=0.53:g11a,c48t,g58a,g139a,c142t,g152t,c154t,c174t,c260t;LP=4;RP=5;RA=-0.322;PRIOR=false;SR=2;AF=0.000150105;AC=1	.	.	.	0.000150105	.	.	.
1	35733337	ALU	TSD=dAGAGTT;ASSESS=5;INTERNAL=NM_022111,3_UTR;SVTYPE=ALU;SVLEN=277;MEINFO=AluY,3,280,+;DIFF=0.95:g11a,g49a,c53t,i65gt,t86g,t93c,c98t,g99a,g151a,g199t,c206t,g237a,g269a,c276t;LP=56;RP=82;RA=-0.55;PRIOR=false;SR=14;AF=0.00520833;AC=6	.	.	.	.	.	0.00520833	.
1	35738114	ALU	TSD=dTATATATAT;ASSESS=5;INTERNAL=CLSPN,INTRONIC;SVTYPE=ALU;SVLEN=279;MEINFO=AluY,1,280,-;DIFF=1:g11a,c20t,g54a,c57t,g139a,c174a,c198t,c206a,g277a;LP=28;RP=4;RA=2.807;PRIOR=false;SR=79;AF=0.024716;AC=2450	.	.	.	.	.	.	0.024716
1	35764273	ALU	TSD=null;ASSESS=3;INTERNAL=CLSPN,EXON_3;SVTYPE=ALU;SVLEN=281;MEINFO=AluYc,0,281,-;DIFF=0.38:c98a;LP=3;RP=7;RA=-1.222;PRIOR=false;SR=5;AF=1.00735e-05;AC=1	.	.	.	.	.	.	1.00735e-05
1	35804869	ALU	TSD=AAGAATCACTCTGT;ASSESS=5;INTERNAL=AGO4,PROMOTER;SVTYPE=ALU;SVLEN=281;MEINFO=AluYa3_3,0,281,+;DIFF=0.98:c57t,t89c,c96a,g208a,g237c;LP=98;RP=113;RA=-0.205;PRIOR=false;SR=64;AF=0.000750525;AC=5	.	.	.	0.000750525	.	.	.
1	35810568	ALU	TSD=AAGTGCTTTTAT;ASSESS=5;INTERNAL=NM_017629,INTRONIC;SVTYPE=ALU;SVLEN=280;MEINFO=AluYa5,1,281,-;DIFF=1:t89c,c96a,g145a,c174t,g237c;LP=13;RP=11;RA=0.241;PRIOR=false;SR=18;AF=0.000716332;AC=1;GENE=AGO4	0.000599042	0.000716332	.	.	.	0.000868056	.
1	35832418	LINE1	TSD=null;ASSESS=3;INTERNAL=AGO4,INTRONIC;SVTYPE=LINE1;SVLEN=3920;MEINFO=L1Ambig,2098,6018,-;DIFF=0.09:n1-4770,c4815t,a4816g,n4847-4899,g4957a,c4977t,a5006c,t5013c,n5039-5227,t5316a,n5322-6019;LP=13;RP=7;RA=0.893;ISTP=-1;PRIOR=false;SR=2;AF=0.000634633;AC=63	.	.	.	.	.	.	0.000634633
1	35832431	ALU	TSD=TTTTTTTTTTTTT;ASSESS=5;INTERNAL=AGO4,INTRONIC;SVTYPE=ALU;SVLEN=52;MEINFO=AluY,229,281,+;DIFF=0.94:c8t,g11a,c53t,i65gt,a76t,c109t,g110a,c138t,g143a,g146a,c150t,g162a,g196c,c213t,c218g,g239a,c260t,c268t,t274a,c276t;LP=26;RP=42;RA=-0.692;PRIOR=false;SR=8;AF=0.000664853;AC=66	.	.	.	.	.	.	0.000664853
1	35847075	ALU	TSD=CATCCTCCCATATGTTTT;ASSESS=5;INTERNAL=AGO4,INTRONIC;SVTYPE=ALU;SVLEN=74;MEINFO=AluY,207,281,-;DIFF=0.94:g5a,g11a,c174t,g190t,g196c,g197a,g199t,c204t,g207a,g214a,t235c,c236t,c238a,g239a,c243t,g261a,c268t;LP=17;RP=14;RA=0.28;PRIOR=false;SR=25;AF=0.0237166;AC=158	.	.	.	0.0237166	.	.	.
1	35847984	ALU	TSD=AAAGAATATCCACAGT;ASSESS=5;INTERNAL=NM_017629,INTRONIC;SVTYPE=ALU;SVLEN=281;MEINFO=AluYa5,0,281,+;DIFF=1:t89c,c96a,g145a,c174t,g237c;LP=341;RP=340;RA=0.004;PRIOR=false;SR=330;AF=0.0164756;AC=23;GENE=AGO4	0.0121805	0.0164756	.	0.047133	0.0238095	0.00694444	.
1	35892796	LINE1	TSD=null;ASSESS=3;INTERNAL=AGO1,INTRONIC;SVTYPE=LINE1;SVLEN=5427;MEINFO=L1Ambig,591,6018,-;DIFF=0.04:n1-4382,c4458t,c4474a,n4519-6019;LP=9;RP=1;RA=3.17;ISTP=-1;PRIOR=false;SR=3;AF=0.00205678;AC=204	.	.	.	.	.	.	0.00205678
1	35937048	ALU	TSD=AAAAATGATGAAAGA;ASSESS=5;INTERNAL=NM_177422,INTRONIC;SVTYPE=ALU;SVLEN=281;MEINFO=AluY,0,281,+;DIFF=0.99:g245a;LP=27;RP=37;RA=-0.455;PRIOR=false;SR=17;AF=0.00139776;AC=7	0.00139776	.	.	.	.	.	.
1	35977199	SVA	TSD=null;ASSESS=3;INTERNAL=NM_177422,INTRONIC;SVTYPE=SVA;SVLEN=339;MEINFO=SVA,976,1315,+;DIFF=0.25:n1-975,g1009t,c1019t,a1053g,g1067a,a1079g,c1129g,c1157t,a1216g,g1268a,t1292c;LP=1;RP=10;RA=-3.322;PRIOR=false;SR=5;GENE=AGO3;AF=0.000199681;AC=1	0.000199681	.	.	.	.	.	.
1	35991617	ALU	TSD=AAAATGATAGTTTAG;ASSESS=5;INTERNAL=NM_177422,INTRONIC;SVTYPE=ALU;SVLEN=279;MEINFO=AluY,1,280,+;DIFF=0.97:c57t,c98a,g143a,g199a,c206t,c213t,c236t,g239a,c260t,g261a,c263t,g269a,g277a;LP=115;RP=199;RA=-0.791;PRIOR=false;SR=16;AF=0.000199681;AC=1	0.000199681	.	.	.	.	.	.
1	35995336	ALU	TSD=AAAGAAGAACGA;ASSESS=5;INTERNAL=AGO3,INTRONIC;SVTYPE=ALU;SVLEN=218;MEINFO=AluY,63,281,+;DIFF=0.96:g5a,c8t,g54a;LP=7;RP=8;RA=-0.193;PRIOR=false;SR=13;AF=0.000150105;AC=1	.	.	.	0.000150105	.	.	.
1	36009093	ALU	TSD=GTTCATGATTCTTTT;ASSESS=5;INTERNAL=NM_177422,INTRONIC;SVTYPE=ALU;SVLEN=280;MEINFO=AluYa5,1,281,-;DIFF=1:t89c,c96a,c98t,a120c,g145a,c174t,a188g,g237c;LP=5102;RP=4691;RA=0.121;PRIOR=false;SR=6172;AF=0.239971;AC=335;GENE=AGO3	0.259185	0.239971	.	0.226959	0.0238095	0.046875	.
1	36012491	ALU	TSD=AAAAATTATA;ASSESS=5;INTERNAL=NM_177422,INTRONIC;SVTYPE=ALU;SVLEN=281;MEINFO=AluYa5,0,281,+;DIFF=1:t89c,c96a,g145a,c174t,g237c;LP=19;RP=23;RA=-0.276;PRIOR=false;SR=18;AF=0.000199681;AC=1	0.000199681	.	.	.	.	.	.
1	36037004	SVA	TSD=null;ASSESS=4;INTERNAL=AGO3,INTRONIC;SVTYPE=SVA;SVLEN=1267;MEINFO=SVA,48,1315,-;DIFF=0.19:n1-1075,a1079g,c1129g,c1146a,c1163a,c1164t,t1267c,g1268a,g1310t;LP=9;RP=3;RA=1.585;PRIOR=false;SR=3;AF=0.000150105;AC=1	.	.	.	0.000150105	.	.	.
1	36071262	ALU	TSD=AATAGCATTCTTTT;ASSESS=5;INTERNAL=null,null;SVTYPE=ALU;SVLEN=246;MEINFO=AluYb9,35,281,-;DIFF=0.88:c57t,c64t,c98a,i118a,t118a,t144c,c174g,g211a,c236t,c238t,i252gcagtcc,c248g,a252g;LP=14;RP=13;RA=0.107;PRIOR=false;SR=16;AF=0.000716332;AC=1;GENE=AGO3	0.000199681	0.000716332	.	.	.	.	.
1	36146616	ALU	TSD=AAAAAAAAAAAAAAAAAAAAAAAA;ASSESS=5;INTERNAL=NM_001270895,INTRONIC;SVTYPE=ALU;SVLEN=278;MEINFO=AluSg,2,280,+;DIFF=0.87:c10t,c48t,c53t,d65-66,c80t,g88t,i129a,c139t,c153g,c157t,c207t,c261t,c264a,c269t,g278a;LP=77;RP=73;RA=0.077;PRIOR=false;SR=31;AF=0.0303819;AC=35	.	.	.	.	.	0.0303819	.
1	36175690	SVA	TSD=AAAAATAGCCCAGCAGC;ASSESS=5;INTERNAL=NM_018067,INTRONIC;SVTYPE=SVA;SVLEN=748;MEINFO=SVA,568,1316,+;DIFF=0.55:n1-451,n459,n463,n466-467,n469,t470g,n476-476,a487c,g500a,a513g,n515,n528,n552,a561c,t564c,n565,a578g,t580c,t582c,n605,g619c,g652t,a653g,a668g,i703gt,t703c,c704a,a705g,g706c,g725a,t729c,g764c,a773g,g820a,g840c,t847g,t862c,g880c,n931-945,g969a,t970c,t985c,g1009t,a1053g,g1067a,a1079g,g112…	0.000199681	.	.	.	.	.	.
1	36200747	ALU	TSD=AAGAAGCTGTGGCAG;ASSESS=5;INTERNAL=null,null;SVTYPE=ALU;SVLEN=280;MEINFO=AluYg,1,281,+;DIFF=1:g52a,g151a,g152c,t173a,c229t,a266g,g271a;LP=16;RP=22;RA=-0.459;PRIOR=false;SR=8;AF=0.000716332;AC=1	.	0.000716332	.	.	.	.	.
1	36213968	ALU	TSD=A;ASSESS=5;INTERNAL=THRAP3,PROMOTER;SVTYPE=ALU;SVLEN=267;MEINFO=AluY,13,280,+;DIFF=0.94:c20t,c22t,g49a,g54a,g58t,g59c,g67c,c70t,g72a,g79a,g81t,g90t,c98t,c106a,c109t,c114t,c174t,g199t,c206g,g214a,c218g,g231a,c260t,g277a;LP=120;RP=68;RA=0.819;PRIOR=false;SR=14;AF=0.00135095;AC=9	.	.	.	0.00135095	.	.	.
1	36214002	ALU	TSD=null;ASSESS=3;INTERNAL=null,null;SVTYPE=ALU;SVLEN=279;MEINFO=AluY,1,280,+;DIFF=0.96:c4t,c10t,c20t,c53t,c57a,t93c,c98t,c109t,c138t,g143a,c150t,g152c,g155a,g199t,g207a,c218g,g231a,c236t,c238t,g261a,c268t,c273t,c276t,g277a;LP=55;RP=38;RA=0.533;PRIOR=false;SR=5;AF=0.00607639;AC=7	.	.	.	.	.	0.00607639	.
1	36214010	ALU	TSD=null;ASSESS=3;INTERNAL=THRAP3,PROMOTER;SVTYPE=ALU;SVLEN=279;MEINFO=AluSc,1,280,+;DIFF=0.9:c8t,g9a,g49a,g54a,d65-66,g67a,t78a,g81c,g88t,c95t,c111t,c116t,i129a,g140a,c143t,c151t,g152a,g154a,g184a,g191a,g198a,c206t;LP=107;RP=43;RA=1.315;PRIOR=false;SR=10;AF=0.00134892;AC=3	.	.	0.00134892	.	.	.	.
1	36229436	ALU	TSD=TTTTTTTTTTGTTTTTTTTTTTTT;ASSESS=5;INTERNAL=NM_005119,INTRONIC;SVTYPE=ALU;SVLEN=141;MEINFO=AluY,140,281,+;DIFF=0.91:g46a,c57t,g79a,g139a,g143a,c154t,g237a,g277a;LP=80;RP=98;RA=-0.293;PRIOR=false;SR=6;AF=0.00173913;AC=2	0.00259585	.	.	.	.	0.00173913	.
1	36243173	ALU	TSD=null;ASSESS=4;INTERNAL=NM_005119,INTRONIC;SVTYPE=ALU;SVLEN=278;MEINFO=AluY,2,280,+;DIFF=0.88:g6a,c10t,c57t,t86g,t93c,c98t,c109t,c138t,g175a,c206t,g214a,c218t,c260g,g277a;LP=46;RP=100;RA=-1.12;PRIOR=false;SR=26;AF=0.0381944;AC=44	.	.	0.000899281	0.0112579	.	0.0381944	.
1	36267649	ALU	TSD=null;ASSESS=4;INTERNAL=NM_005119,INTRONIC;SVTYPE=ALU;SVLEN=254;MEINFO=AluY,27,281,-;DIFF=0.98:c4a,g58a,i65gt,a76t,g79a,t86g,t93c,c98t,c236t,g261a,c276t;LP=19;RP=43;RA=-1.178;PRIOR=false;SR=360;AF=0.388252;AC=542;GENE=THRAP3	0.424321	0.388252	.	.	.	0.447049	.
1	36313992	LINE1	TSD=TTTTTTTTTTTTTTTTTTTT;ASSESS=5;INTERNAL=SH3D21,INTRONIC;SVTYPE=LINE1;SVLEN=764;MEINFO=L1Ambig,5254,6018,+;DIFF=0.01:n1-5253,c5260a,c5262a,t5264a,g5268a,a5270t,c5274t,t5278g,c5284t,g5286a,a5311g,t5316a,g5321t,n5325-5326,n5328-6019;LP=10;RP=14;RA=-0.485;ISTP=0;PRIOR=false;SR=130;AF=0.380666;AC=2536	.	.	.	0.380666	.	.	.
1	36314836	SVA	TSD=GGTTGGCTGTGCTTTTG;ASSESS=5;INTERNAL=SH3D21,INTRONIC;SVTYPE=SVA;SVLEN=1285;MEINFO=SVA,31,1316,-;DIFF=0.22:n1-980,t985c,c990t,g1009t,a1053g,g1067a,a1079g,c1129g,c1146a,c1163a,c1164t,t1267c,g1268a,g1310t;LP=11;RP=1;RA=3.459;PRIOR=false;SR=12;AF=0.000150105;AC=1	.	.	.	0.000150105	.	.	.
1	36320730	LINE1	TSD=null;ASSESS=3;INTERNAL=SH3D21,EXON_11;SVTYPE=LINE1;SVLEN=5184;MEINFO=L1Ambig,834,6018,-;DIFF=0.05:n1-2616,t2638c,a2656g,n2756-2936,n3013-3057,c3066a,t3069a,t3108a,n3113-6019;LP=28;RP=7;RA=2;ISTP=-1;PRIOR=false;SR=5;AF=1.00825e-05;AC=1	.	.	.	.	.	.	1.00825e-05
1	36321905	LINE1	TSD=null;ASSESS=3;INTERNAL=SH3D21,INTRONIC;SVTYPE=LINE1;SVLEN=5288;MEINFO=L1Ambig,730,6018,-;DIFF=0.05:n1-5028,a5092g,c5093a,n5104-5228,a5267g,g5268a,t5316a,t5325c,c5326t,c5329a,c5333t,a5349g,n5373-6019;LP=8;RP=11;RA=-0.459;ISTP=-1;PRIOR=false;SR=3;AF=1.0089e-05;AC=1	.	.	.	.	.	.	1.0089e-05
1	36379960	ALU	TSD=AGAGAGTAGAATGCAGA;ASSESS=5;INTERNAL=NM_001282547,INTRONIC;SVTYPE=ALU;SVLEN=281;MEINFO=AluYa,0,281,+;DIFF=1:t89c,c96a,c150t,g155a,c218g,g231a,g269a,c276t;LP=39;RP=76;RA=-0.963;PRIOR=false;SR=13;AF=0.000199681;AC=1	0.000199681	.	.	.	.	.	.
1	36409869	ALU	TSD=null;ASSESS=4;INTERNAL=OSCP1,TERMINATOR;SVTYPE=ALU;SVLEN=279;MEINFO=AluY,1,280,+;DIFF=0.88:g9a,c10t,c48t,g54a,c57a,c78t,g79a,g81c,c88t,g99a,g110a,c138t,c150t,g151a,g153a,g162a,g196t,g199t,c206t,c213t,g214a,c218g,g231a,g237a,c243t,g261a;LP=5;RP=24;RA=-2.263;PRIOR=false;SR=6;AF=0.00060042;AC=4	.	.	.	0.00060042	.	.	.
1	36419720	ALU	TSD=CCTCACTCTGGTTTCTT;ASSESS=5;INTERNAL=NM_145047,INTRONIC;SVTYPE=ALU;SVLEN=279;MEINFO=AluYa5,2,281,-;DIFF=1:c57t,c64t,t89c,c96a,g145a,c174t,g237c;LP=32;RP=48;RA=-0.585;PRIOR=false;SR=10;AF=0.000199681;AC=1	0.000199681	.	.	.	.	.	.
1	36422701	ALU	TSD=null;ASSESS=3;INTERNAL=OSCP1,INTRONIC;SVTYPE=ALU;SVLEN=279;MEINFO=AluYb,1,280,+;DIFF=0.69:c57t,c64t,c109t,c150t,g155a,c165t,g175a,g211a,c236t,c248g;LP=6;RP=18;RA=-1.585;PRIOR=false;SR=5;AF=0.0005843;AC=58	.	.	.	.	.	.	0.0005843
1	36431651	SVA	TSD=AAAAACTGCTGAGATG;ASSESS=5;INTERNAL=NM_206837,INTRONIC;SVTYPE=SVA;SVLEN=754;MEINFO=SVA,562,1316,+;DIFF=0.27:n1-406,n410,i433c,c452t,c453g,g456a,a487c,a513g,a561c,t564c,t565a,t580c,t582c,g596a,g604c,c612t,c631t,a653g,i657c,a668g,c677t,c678g,g681a,t729c,g764c,n769-1316;LP=570;RP=5;RA=6.833;PRIOR=false;SR=228;AF=0.0207736;AC=29;GENE=OSCP1	0.0123802	0.0207736	.	.	0.00793651	0.00607639	.
1	36491517	ALU	TSD=CTTCTTCATTTTT;ASSESS=5;INTERNAL=null,null;SVTYPE=ALU;SVLEN=280;MEINFO=AluYb,1,281,-;DIFF=1:g5a,c8t,g49a,g58a,g214a,c238t,i252gcagtcc,g253a,c248g,a252g;LP=39;RP=86;RA=-1.141;PRIOR=false;SR=21;AF=0.000599042;AC=3	0.000599042	.	.	.	.	.	.
1	36500371	SVA	TSD=null;ASSESS=4;INTERNAL=null,null;SVTYPE=SVA;SVLEN=1240;MEINFO=SVA,75,1315,-;DIFF=0.31:n1-970,t985c,g1009t,a1053g,g1067a,a1079g,c1129g,c1146a,c1163a,c1164t,t1267c,g1268a,g1310t;LP=8;RP=5;RA=0.678;PRIOR=false;SR=5;AF=0.000716332;AC=1	0.000199681	0.000716332	.	.	.	.	.
1	36549864	SVA	TSD=null;ASSESS=3;INTERNAL=CSF3R,PROMOTER;SVTYPE=SVA;SVLEN=294;MEINFO=SVA,1021,1315,+;DIFF=0.22:n1-1020,a1053g,g1067a,a1079g,g1082a,c1129g,c1146a,c1163a,c1164t,a1193g,t1267c,g1268a,g1310t;LP=1;RP=15;RA=-3.907;PRIOR=false;SR=7;AF=0.000150105;AC=1	.	.	.	0.000150105	.	.	.
1	36580617	LINE1	TSD=GGCTGGTTTTT;ASSESS=5;INTERNAL=null,null;SVTYPE=LINE1;SVLEN=1002;MEINFO=L1Ta,5017,6019,-;DIFF=0.11:n1-5017,c5109t,t5160c,a5181g,n5344,n5398-5402,a5543g,n5553-5674,a5712g,a5769g;LP=18;RP=15;RA=0.263;ISTP=0;PRIOR=false;SR=15;AF=0.000716332;AC=1	0.000798722	0.000716332	.	0.00105074	.	.	.
1	36684951	LINE1	TSD=TTTTTTTTTTTTTTTTTTTTTTTTT;ASSESS=5;INTERNAL=GRIK3,TERMINATOR;SVTYPE=LINE1;SVLEN=908;MEINFO=L1Ambig,5110,6018,+;DIFF=0.03:n1-5109,c5114t,c5151t,t5154a,t5160c,a5166c,a5174t,n5183-5187,n5190,c5196t,g5206a,g5208a,c5224t,c5229t,c5231t,g5236a,t5244a,g5268a,n5286-5287,t5316a,t5325c,c5333t,c5391t,g5506a,c5507a,t5535g,g5538t,c5616t,n5638-6019;LP=3;RP=8;RA=-1.415;ISTP=0;PRIOR=false;SR=4;AF=0.00314748;A…	.	.	0.00314748	.	.	.	.
1	36746082	ALU	TSD=AAGAAGTCATTATCTGA;ASSESS=5;INTERNAL=null,null;SVTYPE=ALU;SVLEN=281;MEINFO=AluYb7_2,0,281,+;DIFF=1:c57t,c64t,c98a,g211a,c236t,i252gcagtcc,g261a,c248g,a252g;LP=1318;RP=1317;RA=0.001;PRIOR=false;SR=1376;AF=0.0537249;AC=75	0.0527157	0.0537249	0.091277	0.0591414	0.0873016	0.0954861	.
1	36750209	ALU	TSD=AAAAAATTAAATTTA;ASSESS=5;INTERNAL=null,null;SVTYPE=ALU;SVLEN=281;MEINFO=AluYb8,0,281,+;DIFF=1:c57t,c64t,c98a,t144c,g211a,c236t,c248g,i252gcagtcc,g253a,a252g;LP=6052;RP=6455;RA=-0.093;PRIOR=false;SR=6852;AF=0.257163;AC=359	0.282548	0.257163	0.354317	0.146352	0.380952	0.467882	.
1	36840208	ALU	TSD=CCTCACTGGGCTTTT;ASSESS=5;INTERNAL=NM_000831,INTRONIC;SVTYPE=ALU;SVLEN=280;MEINFO=AluYa5,1,281,-;DIFF=1:t89c,c96a,g145a,c174t,g237c;LP=126;RP=112;RA=0.17;PRIOR=false;SR=142;AF=0.00716332;AC=10;GENE=GRIK3	0.00399361	0.00716332	.	0.0138097	.	0.00434028	.
1	36866770	ALU	TSD=CAGAGTGGTTTT;ASSESS=5;INTERNAL=NM_000831,INTRONIC;SVTYPE=ALU;SVLEN=280;MEINFO=AluYa4_2,1,281,-;DIFF=1:t89c,c96a,g145a,g237c;LP=61;RP=58;RA=0.073;PRIOR=false;SR=52;AF=0.00286533;AC=4;GENE=GRIK3	0.00519169	0.00286533	.	0.00225158	.	.	.
1	36900163	ALU	TSD=AAAGCACATCTT;ASSESS=5;INTERNAL=GRIK3,INTRONIC;SVTYPE=ALU;SVLEN=280;MEINFO=AluYa4_5,1,281,-;DIFF=1:t89c,c96a,g145a,c174t,c236t;LP=42;RP=49;RA=-0.222;PRIOR=false;SR=65;AF=0.000750525;AC=5	.	.	.	0.000750525	.	.	.
1	36930854	ALU	TSD=CAAAACCTGTATCTT;ASSESS=5;INTERNAL=NM_000831,INTRONIC;SVTYPE=ALU;SVLEN=279;MEINFO=AluYb8,2,281,-;DIFF=1:c57t,c64t,c98a,i127aa,t144c,g211a,g214a,c236t,i252gcagtcc,c248g,a252g;LP=14;RP=12;RA=0.222;PRIOR=false;SR=15;AF=0.000199681;AC=1	0.000199681	.	.	.	.	.	.
1	37017395	ALU	TSD=AAAAAAAAAAAAAAAAAAAAAAAAAA;ASSESS=5;INTERNAL=NM_000831,INTRONIC;SVTYPE=ALU;SVLEN=279;MEINFO=AluY,1,280,-;DIFF=0.99:c57t,g143a,g152c,g162a,c174t,g196c,g199t,c218g,c250t,c268t,c276t;LP=21;RP=15;RA=0.485;PRIOR=false;SR=19;AF=0.0269097;AC=31	.	.	0.00044964	.	.	0.0269097	.
1	37063930	ALU	TSD=AAAATATCCAGATAA;ASSESS=5;INTERNAL=GRIK3,PROMOTER;SVTYPE=ALU;SVLEN=113;MEINFO=AluYe,168,281,+;DIFF=0.4:g65a,c96a,g139a,g151a,g153a,g155a,g207a,a210g,t219c,c236t,d264;LP=9;RP=23;RA=-1.354;PRIOR=false;SR=26;AF=0.00030021;AC=2	.	.	.	0.00030021	.	.	.
1	37144339	ALU	TSD=CAAAACCTCTGCTCTT;ASSESS=5;INTERNAL=null,null;SVTYPE=ALU;SVLEN=88;MEINFO=AluYa1_2,193,281,-;DIFF=0.32:c53t,g58a,c64t,g65a,c92t,c96t,c98t,g237c;LP=4;RP=4;RA=0;PRIOR=false;SR=9;AF=0.000716332;AC=1	0.00159744	0.000716332	.	0.000150105	0.00793651	0.00173611	.
1	37156062	ALU	TSD=ATAAAGACATTAATCAG;ASSESS=5;INTERNAL=MIR4255,PROMOTER;SVTYPE=ALU;SVLEN=84;MEINFO=AluY,197,281,+;DIFF=0.3:NoDifferences;LP=6;RP=11;RA=-0.874;PRIOR=false;SR=24;AF=0.00030021;AC=2	.	.	.	0.00030021	.	.	.
1	37193556	ALU	TSD=AATACATAGCCTGGCT;ASSESS=5;INTERNAL=MIR4255,TERMINATOR;SVTYPE=ALU;SVLEN=188;MEINFO=AluYa,93,281,+;DIFF=0.69:c83t,c96a,g145a,c174t,c236t;LP=5;RP=9;RA=-0.848;PRIOR=false;SR=14;AF=0.000150105;AC=1	.	.	.	0.000150105	.	.	.
1	37225003	ALU	TSD=AAGAACGCTAGCGCTG;ASSESS=5;INTERNAL=null,null;SVTYPE=ALU;SVLEN=280;MEINFO=AluYa4_5,1,281,+;DIFF=1:t89c,c96a,g145a,c174t,c236t;LP=15;RP=11;RA=0.447;PRIOR=false;SR=10;AF=0.000716332;AC=1	0.000399361	0.000716332	.	0.00195137	.	.	.
1	37277110	ALU	TSD=AATAGTTATC;ASSESS=5;INTERNAL=MIR4255,TERMINATOR;SVTYPE=ALU;SVLEN=281;MEINFO=AluYa5,0,281,+;DIFF=1:t89c,c96a,c98t,g145a,c174t,g237c;LP=15;RP=10;RA=0.585;PRIOR=false;SR=13;AF=0.000150105;AC=1	.	.	.	0.000150105	.	.	.
1	37325534	SVA	TSD=null;ASSESS=3;INTERNAL=null,null;SVTYPE=SVA;SVLEN=1240;MEINFO=SVA,75,1315,+;DIFF=0.33:n1-520,a561c,t564c,c569t,a578g,t580c,t582c,a594c,t597a,n623,g632a,n633,c635t,n646-841,g880c,a886g,g898a,c920t,t922g,a931g,a934t,g938a,c945a,g1009t,c1019t,a1041g,a1053g,g1067a,a1068g,a1079g,a1102g,a1116g,c1129g,a1132g,c1157t,a1178g,g1268a,t1292c;LP=1;RP=17;RA=-4.087;PRIOR=false;SR=11;AF=0.000199681;AC=1	0.000199681	.	.	.	.	.	.
1	37366710	ALU	TSD=AAAAGATGGCCACTG;ASSESS=5;INTERNAL=null,null;SVTYPE=ALU;SVLEN=280;MEINFO=AluYa5,1,281,+;DIFF=1:t89c,c96a,g145a,c174t,g237c,g269a;LP=12;RP=13;RA=-0.115;PRIOR=false;SR=9;AF=0.000199681;AC=1	0.000199681	.	.	.	.	.	.
1	37395806	ALU	TSD=GTTTCTTGCTATCTCT;ASSESS=5;INTERNAL=LINC01137,TERMINATOR;SVTYPE=ALU;SVLEN=280;MEINFO=AluYb8,1,281,-;DIFF=1:c57t,c64t,c98a,t144c,g211a,c236t,c248g,i252gcagtcc,g253a,a252g;LP=6;RP=13;RA=-1.115;PRIOR=false;SR=11;AF=0.000150105;AC=1	.	.	.	0.000150105	.	.	.
1	37417388	ALU	TSD=AAAAAAAAAAAAAAAAAA;ASSESS=5;INTERNAL=null,null;SVTYPE=ALU;SVLEN=279;MEINFO=AluSg,1,280,-;DIFF=0.97:g9a,c20t,c48t,c53t,c57t,d65-66,c80t,i129a,g144a,c153g,a163g,c197g,g215a,g278a;LP=44;RP=28;RA=0.652;PRIOR=false;SR=11;AF=0.00347222;AC=4	0.000399361	.	.	.	.	0.00347222	.
1	37421065	ALU	TSD=null;ASSESS=3;INTERNAL=null,null;SVTYPE=ALU;SVLEN=279;MEINFO=AluY,1,280,+;DIFF=1:c4t,c20t,g54a,c57t,i65gt,a76t,t93c,c98t,c138t,g143a,g155a,g199t,g207a,g214a,g237a,g277a;LP=15;RP=39;RA=-1.379;PRIOR=false;SR=9;AF=0.0495652;AC=57	.	.	0.00134892	.	.	0.0495652	.
1	37421099	ALU	TSD=null;ASSESS=4;INTERNAL=null,null;SVTYPE=ALU;SVLEN=279;MEINFO=AluY,1,280,-;DIFF=0.7:c4t,c150t,c174t,g183a,a266g;LP=59;RP=101;RA=-0.776;PRIOR=false;SR=17;AF=0.0471246;AC=236	0.0471246	.	.	.	.	.	.
1	37421100	ALU	TSD=null;ASSESS=4;INTERNAL=LINC01137,TERMINATOR;SVTYPE=ALU;SVLEN=279;MEINFO=AluY,1,280,-;DIFF=0.92:c4t,g9a,c10t,g14a,c53t,c57t,g65a,c78t,c98t,g110a,t124a,c126a,g175a,c198t,g207a,c213t,c218t,c230t,c236g,c238a,g239a,g267a,c268t;LP=5;RP=6;RA=-0.263;PRIOR=false;SR=8;AF=0.022816;AC=152	.	.	0.00134892	0.022816	.	.	.
1	37427632	ALU	TSD=null;ASSESS=3;INTERNAL=null,null;SVTYPE=ALU;SVLEN=279;MEINFO=AluY,1,280,+;DIFF=0.35:g5a,c78t,g79a,t86g,t93c,c98t,g99a,c187t,a188g,a193g;LP=37;RP=26;RA=0.509;PRIOR=false;SR=76;AF=0.00429799;AC=6	0.0071885	0.00429799	.	0.00105074	.	0.00434028	.
1	37432932	ALU	TSD=CTGTGGTGGATCTTTCT;ASSESS=5;INTERNAL=null,null;SVTYPE=ALU;SVLEN=279;MEINFO=AluYc1,2,281,-;DIFF=1:g148a;LP=55;RP=72;RA=-0.389;PRIOR=false;SR=25;AF=0.000399361;AC=2	0.000399361	.	.	.	.	.	.
1	37437488	ALU	TSD=CTCAGCCAGACAATTCTT;ASSESS=5;INTERNAL=LINC01137,TERMINATOR;SVTYPE=ALU;SVLEN=129;MEINFO=AluYb,152,281,-;DIFF=0.8:g5a,c10t,g11a,c48t,g52a,g54a,c57a,c64t,g99a,g100a,g110a,c114g,c117g,c126a,t133a,g136a,c142t,c150t,g211a,c236t,c248g,i252gcagtcc,g253a,a252g;LP=11;RP=11;RA=0;PRIOR=false;SR=9;AF=0.000150105;AC=1	.	.	.	0.000150105	.	.	.
1	37492581	ALU	TSD=AAAAAAAAAAAAAAAAAAAAA;ASSESS=5;INTERNAL=NR_073090,3_UTR;SVTYPE=ALU;SVLEN=279;MEINFO=AluSg,1,280,+;DIFF=0.62:g51a,c57t,g58a,d65-66,g67a,c111t,i129a,c139t,c143t,g152a,c197g,c207t,g219c,c231t,c237g,c239t,c241t,a273t,g278a;LP=60;RP=56;RA=0.1;PRIOR=false;SR=110;AF=0.124132;AC=143	0.0105831	.	.	0.00390273	.	0.124132	.
1	37507453	ALU	TSD=null;ASSESS=3;INTERNAL=NR_073090,INTRONIC;SVTYPE=ALU;SVLEN=279;MEINFO=AluY,1,280,-;DIFF=0.99:c4t,g9a,g49a,g54a,a76t,g79a,g196c,g199t,c206t,g207a,g214a,c218g,g231a,g257a,g261a;LP=54;RP=65;RA=-0.267;PRIOR=false;SR=10;AF=0.00520833;AC=6	.	.	.	.	.	0.00520833	.
1	37509284	ALU	TSD=CAACTTACTCTTTTC;ASSESS=5;INTERNAL=MEAF6,EXON_4;SVTYPE=ALU;SVLEN=279;MEINFO=AluYb8,2,281,-;DIFF=1:c57t,c64t,c98a,t144c,g211a,c236t,c248g,i252gcagtcc,g253a,a252g;LP=18;RP=14;RA=0.363;PRIOR=false;SR=23;AF=0.000150105;AC=1	.	.	.	0.000150105	.	.	.
1	37527495	ALU	TSD=TTATTTATTTATTTATTTATTTATTTATTTA;ASSESS=5;INTERNAL=NM_024700,TERMINATOR;SVTYPE=ALU;SVLEN=279;MEINFO=AluY,1,280,-;DIFF=0.81:c48t,c98t,g139a,c206t,g214a,c230t,g237a,g239a,c241a,a242g,c248g;LP=22;RP=49;RA=-1.155;PRIOR=false;SR=7;AF=0.00522648;AC=6	.	.	.	.	.	0.00522648	.
1	37580447	ALU	TSD=AAAGATATTTTCA;ASSESS=5;INTERNAL=GNL2,INTRONIC;SVTYPE=ALU;SVLEN=279;MEINFO=AluY,1,280,-;DIFF=0.95:g5a,c8t,g11a,g72a,t89c,c96a,g99a,g110a,t115a,g139a,c174t,g196t,g199t,c213a,g237a,g239a,c268t;LP=15;RP=33;RA=-1.138;PRIOR=false;SR=16;AF=0.000150105;AC=1	.	.	.	0.000150105	.	.	.
1	37583037	ALU	TSD=null;ASSESS=4;INTERNAL=GNL2,INTRONIC;SVTYPE=ALU;SVLEN=279;MEINFO=AluSg,1,280,+;DIFF=0.62:g21a,g54a,g58a,d65-66,g67a,c80t,c98t,i134c,c153g,c155t,c199t,c207t,g208a,g219c,c231t,g240a,c241t,c249t,d253-282;LP=8;RP=27;RA=-1.755;PRIOR=false;SR=2;AF=1.00882e-05;AC=1	.	.	.	.	.	.	1.00882e-05
1	37695905	LINE1	TSD=CAACGTTCTTTTT;ASSESS=5;INTERNAL=CDCA8,INTRONIC;SVTYPE=LINE1;SVLEN=927;MEINFO=L1Ta,5092,6019,-;DIFF=0.04:n1-5092,t5160c,g5208a,c5391t,n5400-5796,n5870,n5948-5958,a6008t;LP=2;RP=7;RA=-1.807;ISTP=0;PRIOR=false;SR=6;AF=0.000150105;AC=1	.	.	.	0.000150105	.	.	.
1	37699609	ALU	TSD=GAAAGGAAA;ASSESS=5;INTERNAL=NM_018101,INTRONIC;SVTYPE=ALU;SVLEN=274;MEINFO=AluY,6,280,-;DIFF=0.98:c10t,c32a,c64t,c98t,i127aaa,g207a,c213t,c238t,g239a,g267a,c268t,g269a,c276t;LP=77;RP=72;RA=0.097;PRIOR=false;SR=177;AF=0.0338542;AC=39	.	.	0.00269784	0.00195137	.	0.0338542	.
1	37709687	ALU	TSD=GCTGGTACCTACTTTC;ASSESS=5;INTERNAL=CDCA8,3_UTR;SVTYPE=ALU;SVLEN=245;MEINFO=AluYb8,36,281,-;DIFF=0.9:c57t,c64t,c98a,t144c,g145t,g211a,c236t,i252gcagtcc,c248g,a252g;LP=23;RP=30;RA=-0.383;PRIOR=false;SR=42;AF=0.000450315;AC=3	.	.	.	0.000450315	.	.	.
1	37737959	ALU	TSD=TTTTTTTTTTTTTTTTTTTTTTTTTTT;ASSESS=5;INTERNAL=NM_001099439,INTRONIC;SVTYPE=ALU;SVLEN=279;MEINFO=AluY,1,280,-;DIFF=0.97:c20t,c48t,a76t,t86g,t93c,g143a,t173a,g207a,g214a,c218g,g231a,t235a,g237a,g259t,c260t,c263t,c268t,g269a,c276t;LP=25;RP=41;RA=-0.714;PRIOR=false;SR=10;AF=0.0451389;AC=52	.	.	.	.	.	0.0451389	.
1	37775724	SVA	TSD=null;ASSESS=4;INTERNAL=null,null;SVTYPE=SVA;SVLEN=1240;MEINFO=SVA,75,1315,+;DIFF=0.34:n1-852,t862c,g880c,g938a,c945a,t970c,t985c,n990,g1009t,a1053g,g1067a,a1079g,c1129g,c1146a,c1163a,c1164t,t1267c,g1268a,g1310t;LP=18075;RP=5210;RA=1.795;PRIOR=false;SR=12260;AF=0.459169;AC=641	0.450479	0.459169	0.442896	0.480787	0.396825	0.383681	.
1	37788768	ALU	TSD=null;ASSESS=4;INTERNAL=NM_001113482,PROMOTER;SVTYPE=ALU;SVLEN=236;MEINFO=AluSz,45,281,-;DIFF=0.85:g9a,c20a,c22t,t26c,c48t,c53t,g54a,g58a,d64-65,g77c,g101a,g102a,c109a,c111t,i129g,c153g,a163g,c197g,t200a,g219c,c231t,g238a,c239t,g278a;LP=16;RP=43;RA=-1.426;PRIOR=false;SR=6;AF=0.00173611;AC=2	.	.	.	.	.	0.00173611	.
1	37828173	ALU	TSD=null;ASSESS=3;INTERNAL=NM_005955,INTRONIC;SVTYPE=ALU;SVLEN=279;MEINFO=AluY,1,280,+;DIFF=0.93:c10t,c57t,i65gt,t86g,g162a,g231a,c260t,g269a;LP=71;RP=114;RA=-0.683;PRIOR=false;SR=23;AF=0.000868056;AC=1	.	.	.	0.00030021	.	0.000868056	.
1	37828186	ALU	TSD=AAAAAAAAAAAAA;ASSESS=5;INTERNAL=NM_005955,INTRONIC;SVTYPE=ALU;SVLEN=279;MEINFO=AluSz,1,280,-;DIFF=0.74:c8t,c10a,g21a,c48t,g54a,c57t,t65g,g88t,c95t,i129a,g144a,g152a,g154a,c207t,g208a,g229t,c231t,g234c,g238a,c239t,g240t,g262t,c269t,d277-282;LP=36;RP=60;RA=-0.737;PRIOR=false;SR=13;AF=0.00143266;AC=2;GENE=MTF1	.	0.00143266	.	.	.	.	.
1	37838797	SVA	TSD=null;ASSESS=3;INTERNAL=MTF1,INTRONIC;SVTYPE=SVA;SVLEN=232;MEINFO=SVA,1083,1315,+;DIFF=0.12:n1-1082,c1129a,n1159-1162,g1191t,n1239-1316;LP=5;RP=1;RA=2.322;PRIOR=false;SR=17;AF=0.119912;AC=11901	.	.	.	.	.	.	0.119912
1	37849715	ALU	TSD=AAGAATGGACTGCA;ASSESS=5;INTERNAL=NM_005955,INTRONIC;SVTYPE=ALU;SVLEN=253;MEINFO=AluY,28,281,+;DIFF=0.99:c20t,c98t,g261a,g269a;LP=26;RP=22;RA=0.241;PRIOR=false;SR=13;AF=0.000199681;AC=1	0.000199681	.	.	.	.	.	.
1	37946707	ALU	TSD=GGGGACAGTTTTTGTT;ASSESS=5;INTERNAL=INPP5B,INTRONIC;SVTYPE=ALU;SVLEN=281;MEINFO=AluYb8,0,281,-;DIFF=0.99:c57t,c64t,c98a,d119,t144c,g211a,c236t,i252gcagtcc,c248t,c248g,a252g;LP=46;RP=85;RA=-0.886;PRIOR=false;SR=56;AF=0.00120084;AC=8	.	.	.	0.00120084	.	.	.
1	37963895	ALU	TSD=AAAAAAAAAAAAAAAAAAAAAAA;ASSESS=5;INTERNAL=SF3A3,INTRONIC;SVTYPE=ALU;SVLEN=279;MEINFO=AluY,1,280,+;DIFF=0.89:g5a,c10t,c20t,g58a,c78t,t93a,c98t,g99a,g110a,g143a,g153a,g162a,g175a,g177a,c181t,g196t,g199t,c218a,c230a,g237a,c260a,a264t,g269a,a272c;LP=24;RP=15;RA=0.678;PRIOR=false;SR=7;AF=0.000750525;AC=5	.	.	.	0.000750525	.	.	.
1	37965319	ALU	TSD=AAAAAAAAAAAAAAAAA;ASSESS=5;INTERNAL=NM_006802,INTRONIC;SVTYPE=ALU;SVLEN=279;MEINFO=AluSg,1,280,+;DIFF=0.99:c4t,d65-66,c80t,c111t,i129aa,g140a,c153a,c175t,t200a,c207t,g215a,g219t,g238a;LP=85;RP=65;RA=0.387;PRIOR=false;SR=49;AF=0.0425347;AC=49	.	.	.	.	.	0.0425347	.
1	37969779	ALU	TSD=AGAAAAAAGTAGTGCAG;ASSESS=5;INTERNAL=NM_006802,INTRONIC;SVTYPE=ALU;SVLEN=280;MEINFO=AluYc1,1,281,+;DIFF=0.96:g5a,c8a,g11a,i119aa,g148a,a191g;LP=25;RP=41;RA=-0.714;PRIOR=false;SR=27;AF=0.00143266;AC=2;GENE=SF3A3	0.000599042	0.00143266	.	0.00225158	.	.	3.02206e-05
1	37982045	ALU	TSD=AAAATAAAGATC;ASSESS=5;INTERNAL=NM_006802,INTRONIC;SVTYPE=ALU;SVLEN=281;MEINFO=AluYa5,0,281,+;DIFF=1:t89c,c96a,g145a,c174t,g237c;LP=1319;RP=1304;RA=0.017;PRIOR=false;SR=1581;AF=0.0623209;AC=87;GENE=SF3A3	0.0684904	0.0623209	0.0993705	0.022816	0.174603	0.0920139	.
1	37990116	ALU	TSD=null;ASSESS=4;INTERNAL=SF3A3,PROMOTER;SVTYPE=ALU;SVLEN=280;MEINFO=AluSz,1,281,+;DIFF=0.81:g58a,d64-65,t78a,g88t,c95t,t100a,i129a,g152a,g154t,g156a,g186a,g198a,c207t,c249g,a253g;LP=8;RP=6;RA=0.415;PRIOR=false;SR=2;AF=1.2988e-05;AC=1	.	.	.	.	.	.	1.2988e-05
1	38067159	ALU	TSD=AAGAGATGGAGG;ASSESS=5;INTERNAL=null,null;SVTYPE=ALU;SVLEN=268;MEINFO=AluYc1,13,281,+;DIFF=0.99:g148a;LP=42;RP=86;RA=-1.034;PRIOR=false;SR=37;AF=0.00119808;AC=6	0.00119808	.	.	0.002852	.	.	.
1	38124965	ALU	TSD=TCAAGCCTGGCTATTCT;ASSESS=5;INTERNAL=null,null;SVTYPE=ALU;SVLEN=246;MEINFO=AluYb6_2,35,281,-;DIFF=0.88:c10t,c20t,c57t,c64t,c98a,t144c,g211a,c236t,c248g,a252g;LP=10;RP=9;RA=0.152;PRIOR=false;SR=25;AF=0.000199681;AC=1	0.000199681	.	.	.	.	.	.
1	38152331	SVA	TSD=CATACTTTCTT;ASSESS=5;INTERNAL=null,null;SVTYPE=SVA;SVLEN=1312;MEINFO=SVA,4,1316,-;DIFF=0.3:n1-804,a825g,a827g,a836g,a838g,g840t,n862,n865,n871-872,g880c,a886g,n897-898,c920t,t922g,a931g,a934t,g938a,c945a,n958-959,n963,g1009t,c1019t,a1041g,a1053g,g1067a,a1068g,a1079g,a1102g,a1116g,c1129g,a1132g,c1157t,a1178g,g1268a,t1292c;LP=21;RP=1;RA=4.392;PRIOR=false;SR=7;GENE=LOC105378654;AF=0.000399361;AC…	0.000399361	.	.	.	.	.	.
1	38168047	LINE1	TSD=AAAAATAGAAAAAAACTAGCCAGG;ASSESS=5;INTERNAL=LINC01343,TERMINATOR;SVTYPE=LINE1;SVLEN=6016;MEINFO=L1Ambig,3,6019,+;DIFF=0.11:n1,i73g,c115a,g167a,t231c,t254a,c257t,g352a,n504-6019;LP=45;RP=28;RA=0.684;ISTP=0;PRIOR=false;SR=33;AF=0.000450315;AC=3	.	.	.	0.000450315	.	.	.
1	38261140	LINE1	TSD=GAGTCACATGTCTTTCTT;ASSESS=5;INTERNAL=LINC01343,PROMOTER;SVTYPE=LINE1;SVLEN=6019;MEINFO=L1Ambig,0,6019,-;DIFF=0.07:n1-3,i73g,c115a,c143t,g167a,t231c,t254a,c257t,g352a,n372-6019;LP=10;RP=11;RA=-0.138;ISTP=0;PRIOR=false;SR=12;AF=0.000150105;AC=1	.	.	.	0.000150105	.	.	.
1	38278953	ALU	TSD=CAACTTCTTT;ASSESS=5;INTERNAL=LINC01343,PROMOTER;SVTYPE=ALU;SVLEN=280;MEINFO=AluYb8,1,281,-;DIFF=1:c57t,c64t,c98a,t144c,g211a,c236t,i252gcagtcc,c248g,a252g;LP=11;RP=15;RA=-0.447;PRIOR=false;SR=10;AF=0.000150105;AC=1	.	.	.	0.000150105	.	.	.
1	38301756	ALU	TSD=dCTGT;ASSESS=5;INTERNAL=null,null;SVTYPE=ALU;SVLEN=279;MEINFO=AluY,1,280,+;DIFF=0.86:c8t,g9a,c10t,g54a,c57t,c64t,c78t,t86g,t93c,c98t,g110a,g143a,c213t,g214a,c230t,c236t,g239a,g257a,c260t;LP=17;RP=54;RA=-1.667;PRIOR=false;SR=26;AF=0.0260417;AC=30	0.000599042	.	.	.	.	0.0260417	.
1	38306862	SVA	TSD=AAAATAAAAGTTA;ASSESS=5;INTERNAL=LINC01343,PROMOTER;SVTYPE=SVA;SVLEN=1290;MEINFO=SVA,26,1316,+;DIFF=0.25:n1-973,g1009t,c1019t,a1053g,g1067a,a1079g,c1129g,c1157t,i1185aaggcc,g1268a,t1292c;LP=2;RP=22;RA=-3.459;PRIOR=false;SR=13;AF=0.00030021;AC=2	.	.	.	0.00030021	.	.	.
1	38377343	ALU	TSD=AAATAGGTGGGAGC;ASSESS=5;INTERNAL=LINC01343,PROMOTER;SVTYPE=ALU;SVLEN=281;MEINFO=AluYb8,0,281,+;DIFF=1:c57t,c64t,c98a,t144c,g211a,c236t,i252gcagtcc,c248g,a252g;LP=15;RP=15;RA=0;PRIOR=false;SR=23;AF=0.000150105;AC=1	.	.	.	0.000150105	.	.	.
1	38384252	ALU	TSD=null;ASSESS=1;INTERNAL=LINC01343,PROMOTER;SVTYPE=ALU;SVLEN=279;MEINFO=AluJo,1,280,+;DIFF=0.26:c220t,a224t,t233a,g238a,g240a,c269g,c275t;LP=3;RP=3;RA=0;PRIOR=false;SR=0;AF=0.000450315;AC=3	.	.	.	0.000450315	.	.	.
1	38388257	ALU	TSD=AAAAAACTAGAAAACA;ASSESS=5;INTERNAL=null,null;SVTYPE=ALU;SVLEN=281;MEINFO=AluYb8,0,281,+;DIFF=1:g5a,c57t,c64t,c98a,t144c,g211a,c236t,c248g,i252gcagtcc,g253a,a252g;LP=109;RP=135;RA=-0.309;PRIOR=false;SR=139;AF=0.00644699;AC=9;GENE=LOC105378657	0.00758786	0.00644699	.	0.0345242	.	0.00347222	.
1	38632121	ALU	TSD=TCATTGATTTTTT;ASSESS=5;INTERNAL=null,null;SVTYPE=ALU;SVLEN=280;MEINFO=AluYk13,1,281,-;DIFF=1:c10t,c57t,c64t,g99a,c142a,t144c,g155t,c174t,g176a,g207a,g269c,t274g,c276t,i127a;LP=17;RP=11;RA=0.628;PRIOR=false;SR=21;AF=0.000199681;AC=1	0.000199681	.	.	.	.	.	.
1	38669537	ALU	TSD=CCATAAATTTTTT;ASSESS=5;INTERNAL=null,null;SVTYPE=ALU;SVLEN=279;MEINFO=AluYb7_4,2,281,-;DIFF=1:c57t,c64t,c98a,t144c,c236t,i252gcagtcc,c248g,a252g;LP=14;RP=32;RA=-1.193;PRIOR=false;SR=10;AF=0.00793651;AC=1	0.000199681	.	.	.	0.00793651	.	.
1	38729703	ALU	TSD=null;ASSESS=4;INTERNAL=RRAGC,TERMINATOR;SVTYPE=ALU;SVLEN=279;MEINFO=AluSz,1,280,+;DIFF=0.84:g7a,c8t,c20t,g42a,c48t,c53t,c57t,d64-65,t66a,g67c,t78a,g81a,c85t,g88t,c95t,g112a,i129a,c139a,g144a,g152a,g154a,c155t,c175t,g198a,t201a,c207t,c214t,g216a,c231t,c261t,g270a,d278-282;LP=145;RP=32;RA=2.18;PRIOR=false;SR=75;AF=0.00405284;AC=27	.	.	0.00269784	0.00405284	.	.	.
1	38729712	ALU	TSD=null;ASSESS=4;INTERNAL=null,null;SVTYPE=ALU;SVLEN=240;MEINFO=AluY,40,280,-;DIFF=0.57:g49a,g54a,g65a,c78g,c109t,g139a,c142t,c150t,g155a,c174a,g196c,c198t,g199a,c206t,c213t,g231a,t235a,g237a,c238t,t256a,c260t,g269a;LP=99;RP=27;RA=1.874;PRIOR=false;SR=25;AF=0.000868056;AC=1	0.000199681	.	.	.	.	0.000868056	.
1	38798106	ALU	TSD=TTGATGCAGCTTTTTT;ASSESS=5;INTERNAL=null,null;SVTYPE=ALU;SVLEN=280;MEINFO=AluYa4_4,1,281,-;DIFF=1:c96a,c98t,g145a,c174t,g237c;LP=52;RP=59;RA=-0.182;PRIOR=false;SR=16;AF=0.000199681;AC=1	0.000199681	.	.	.	.	.	.
1	38814927	SVA	TSD=null;ASSESS=4;INTERNAL=null,null;SVTYPE=SVA;SVLEN=474;MEINFO=SVA,841,1315,-;DIFF=0.2:n1-840,g880c,a886g,g898a,c920g,t922g,a931g,a934t,n938,c945a,n987-1004,g1009t,c1019t,a1053g,g1067a,a1079g,c1157t,g1268a,t1292c;LP=9;RP=1;RA=3.17;PRIOR=false;SR=6;AF=0.000716332;AC=1	0.000199681	0.000716332	.	.	.	.	.
1	38829937	SVA	TSD=AAAACTGAAATTC;ASSESS=5;INTERNAL=NM_022157,TERMINATOR;SVTYPE=SVA;SVLEN=1306;MEINFO=SVA,10,1316,+;DIFF=0.27:n1-904,n928,n936-938,c945a,t970c,t985c,g1009t,a1053g,g1064a,g1067a,a1079g,a1106c,c1129g,c1146a,c1163a,c1164t,t1267c,g1268a,g1310t;LP=79;RP=1304;RA=-4.045;PRIOR=false;SR=1141;AF=0.0580229;AC=81	0.0483227	0.0580229	.	0.119183	.	.	.
1	38883337	ALU	TSD=ACACACACACACACACA;ASSESS=5;INTERNAL=RHBDL2,TERMINATOR;SVTYPE=ALU;SVLEN=279;MEINFO=AluSc,1,280,+;DIFF=1:c4t,c8t,g11a,d65-66,g88t,a99g,g101a,c109t,g112a,i129a,g140t,g144a,g152a,c153g,a163g,c175t,c197t,g208a,g215a,g270a;LP=21;RP=27;RA=-0.363;PRIOR=false;SR=7;AF=0.00359712;AC=8	.	.	0.00359712	.	.	.	.
1	38886392	ALU	TSD=null;ASSESS=3;INTERNAL=NM_017821,3_UTR;SVTYPE=ALU;SVLEN=279;MEINFO=AluY,1,280,-;DIFF=1:g7a,c8t,c10t,g79a,t86g,c98t,g110a,g152t,c154t,g237a,c268t;LP=38;RP=48;RA=-0.337;PRIOR=false;SR=3;AF=0.000199681;AC=1	0.000199681	.	.	.	.	.	.
1	38886392	SVA	TSD=null;ASSESS=3;INTERNAL=NM_017821,3_UTR;SVTYPE=SVA;SVLEN=1240;MEINFO=SVA,75,1315,+;DIFF=0.21:n1-938,c945a,g1009t,c1019t,a1041g,a1053g,g1067a,a1068g,a1079g,a1102g,a1116g,c1129g,a1132g,c1157t,a1178g,g1268a,t1292c;LP=1;RP=10;RA=-3.322;PRIOR=false;SR=3;GENE=RHBDL2;AF=0.000199681;AC=1	0.000199681	.	.	.	.	.	.
1	38908180	ALU	TSD=AAAAAAAAAAAAAAAAAAA;ASSESS=5;INTERNAL=NM_017821,INTRONIC;SVTYPE=ALU;SVLEN=279;MEINFO=AluY,1,280,+;DIFF=0.96:g5a,g9t,g21a,g49a,g54a,g79a,c98t,g110a,g199a,g239a,g261a,c268t;LP=39;RP=40;RA=-0.037;PRIOR=false;SR=59;AF=0.00954861;AC=11	.	.	.	.	.	0.00954861	.
1	38972489	ALU	TSD=AAAAAAAAAAAAAAAA;ASSESS=5;INTERNAL=null,null;SVTYPE=ALU;SVLEN=279;MEINFO=AluSc,1,280,+;DIFF=0.96:g9a,c53t,d65-66,t78a,i129a,c143t,c153g,a163g,c214t,c237t,c269t;LP=43;RP=41;RA=0.069;PRIOR=false;SR=10;AF=0.00520833;AC=6	.	.	.	.	.	0.00520833	.
1	38977646	ALU	TSD=null;ASSESS=3;INTERNAL=AKIRIN1,PROMOTER;SVTYPE=ALU;SVLEN=269;MEINFO=AluSz,11,280,-;DIFF=0.25:a125t,t126a,t134g,c143t,g150a,g152a,c153t,a163g,g198a,g208a,c223t,c237g,c252t,g262a,c264t,a265g,c269t,c277t;LP=8;RP=11;RA=-0.459;PRIOR=false;SR=6;AF=0.0744521;AC=496	.	.	0.0377698	0.0744521	.	.	.
1	38977678	ALU	TSD=null;ASSESS=4;INTERNAL=null,null;SVTYPE=ALU;SVLEN=269;MEINFO=AluY,11,280,+;DIFF=0.95:c20t,g21a,c48g,g54a,c57t,g58a,g79a,c98t,g110a,g162a,g199t,c218g,g231a,c236a;LP=33;RP=40;RA=-0.278;PRIOR=false;SR=22;AF=0.0425347;AC=49	.	.	.	.	.	0.0425347	.
1	38978669	SVA	TSD=null;ASSESS=3;INTERNAL=AKIRIN1,PROMOTER;SVTYPE=SVA;SVLEN=289;MEINFO=SVA,1026,1315,+;DIFF=0.16:n1-1025,a1041g,a1053g,g1067a,a1068g,a1079g,a1102g,a1116g,a1132g,c1157t,a1178g,g1268a,t1292c;LP=1;RP=17;RA=-4.087;PRIOR=false;SR=12;AF=0.00030021;AC=2	.	.	.	0.00030021	.	.	.
1	38983671	ALU	TSD=null;ASSESS=4;INTERNAL=NM_001136275,PROMOTER;SVTYPE=ALU;SVLEN=279;MEINFO=AluSc,1,280,-;DIFF=1:g54a,g58a,d65-66,t78a,g81a,g101a,t103a,i129a,g140a,c143t,c153g,g156a,a163g,g240a,g270a,g272a;LP=33;RP=28;RA=0.237;PRIOR=false;SR=4;AF=0.00954861;AC=11	.	.	.	.	.	0.00954861	.
1	39051138	ALU	TSD=null;ASSESS=3;INTERNAL=null,null;SVTYPE=ALU;SVLEN=279;MEINFO=AluY,1,280,-;DIFF=1:c4t,c20t,t93c,c98t,c138t,c238t,g269a;LP=46;RP=52;RA=-0.177;PRIOR=false;SR=21;AF=0.03125;AC=36	.	.	.	.	.	0.03125	.
1	39060946	ALU	TSD=AAAAAAAAAAAAAA;ASSESS=5;INTERNAL=null,null;SVTYPE=ALU;SVLEN=279;MEINFO=AluY,1,280,+;DIFF=0.93:g9a,c10t,i65gt,t86g,g139a,g162a,c174t,c206t,g214a,g231a,g237c,c240t,g269a;LP=69;RP=56;RA=0.301;PRIOR=false;SR=17;AF=0.0659722;AC=76	.	.	.	.	.	0.0659722	.
1	39103511	ALU	TSD=CCCAGAGTTAGCATTTCT;ASSESS=5;INTERNAL=NM_012090,INTRONIC;SVTYPE=ALU;SVLEN=279;MEINFO=AluY,1,280,+;DIFF=0.91:c23t,c30t,c57t,d85,a97t,a135g,g148a,i175g,g231c;LP=14;RP=10;RA=0.485;PRIOR=false;SR=9;AF=0.000199681;AC=1	0.000199681	.	.	.	.	.	.
1	39141500	SVA	TSD=TTGGGCAAGTTCTT;ASSESS=5;INTERNAL=MACF1,INTRONIC;SVTYPE=SVA;SVLEN=1240;MEINFO=SVA,75,1315,-;DIFF=0.31:n1-1093,n1124-1125,n1129,c1146a,c1163a,c1164t,t1267c,g1268a,g1310t;LP=8;RP=16;RA=-1;PRIOR=false;SR=6;AF=0.000150105;AC=1	.	.	.	0.000150105	.	.	.
1	39147340	ALU	TSD=null;ASSESS=4;INTERNAL=NM_012090,INTRONIC;SVTYPE=ALU;SVLEN=279;MEINFO=AluY,1,280,-;DIFF=0.99:g11a,g58a,g99a,g110a,g139a,g143a,g151a,g196a,g199t,g207a,c230t,c236t,c238t,g265a,c268t,g277a;LP=20;RP=21;RA=-0.07;PRIOR=false;SR=5;AF=0.000868056;AC=1	.	.	.	.	.	0.000868056	.
1	39187001	ALU	TSD=TTTTTTTTTTTTTTT;ASSESS=5;INTERNAL=NM_012090,INTRONIC;SVTYPE=ALU;SVLEN=279;MEINFO=AluY,1,280,-;DIFF=0.99:c4t,g5t,c10t,g34a,c57t,i65gt,c98t,g139a,g162a,g199t,c218g,g237a;LP=32;RP=25;RA=0.356;PRIOR=false;SR=12;AF=0.0199653;AC=23	.	.	.	.	.	0.0199653	.
1	39192656	ALU	TSD=AAAAACTTAGTCTT;ASSESS=5;INTERNAL=MACF1,INTRONIC;SVTYPE=ALU;SVLEN=281;MEINFO=AluYb6_2,0,281,+;DIFF=1:g12t,c57t,c64t,c98a,t144c,g211a,c236t,c248g,g269a;LP=12;RP=18;RA=-0.585;PRIOR=false;SR=12;AF=0.000150105;AC=1	.	.	.	0.000150105	.	.	.
1	39194335	ALU	TSD=dCTTTTCTTTTCTTTTC;ASSESS=5;INTERNAL=NM_012090,INTRONIC;SVTYPE=ALU;SVLEN=279;MEINFO=AluSz,1,280,-;DIFF=0.51:g54a,g58a,t65g,t78a,c109t,i129a,c139t,c143t,c231t,g238a,c239t,g270a,a273g,c277t;LP=48;RP=41;RA=0.227;PRIOR=false;SR=14;AF=0.0208333;AC=24	.	.	.	.	.	0.0208333	.
1	39212003	ALU	TSD=AATAGTGGGTGAT;ASSESS=5;INTERNAL=NM_012090,INTRONIC;SVTYPE=ALU;SVLEN=281;MEINFO=AluYa5a1,0,281,+;DIFF=1:a82g,t89c,c96a,g145a,c174t,c206t,g237c,i127a;LP=2254;RP=2673;RA=-0.246;PRIOR=false;SR=3105;AF=0.13467;AC=188;GENE=MACF1	0.138778	0.13467	0.0314748	0.256079	0.0238095	0.0685764	.
1	39216764	ALU	TSD=AAAAGTGCTTGGAG;ASSESS=5;INTERNAL=NM_012090,INTRONIC;SVTYPE=ALU;SVLEN=281;MEINFO=AluYa5,0,281,+;DIFF=1:t89c,c96a,g145a,c174t,g237c;LP=25;RP=24;RA=0.059;PRIOR=false;SR=22;AF=0.00143266;AC=2;GENE=MACF1	0.000399361	0.00143266	.	0.000150105	.	.	.
1	39233808	ALU	TSD=null;ASSESS=4;INTERNAL=NM_012090,INTRONIC;SVTYPE=ALU;SVLEN=279;MEINFO=AluY,1,280,+;DIFF=0.95:c48t,c57t,i65gt,a76t,t86g,c154t,g207a,c230t,g237a,c238t,c240t,c243t,g261a,c276t;LP=32;RP=43;RA=-0.426;PRIOR=false;SR=19;AF=0.0634783;AC=73	.	.	0.0296763	.	.	0.0634783	.
1	39281496	ALU	TSD=AAAACTTTTTT;ASSESS=5;INTERNAL=NM_012090,INTRONIC;SVTYPE=ALU;SVLEN=279;MEINFO=AluYb8,2,281,-;DIFF=1:c57t,c64t,c98a,t144c,g211a,c236t,i252gcagtcc,c248g,a252g;LP=1724;RP=1524;RA=0.178;PRIOR=false;SR=1477;AF=0.0644699;AC=90;GENE=MACF1	0.0577077	0.0644699	0.0723921	0.105674	0.047619	0.046875	.
1	39304017	ALU	TSD=null;ASSESS=3;INTERNAL=NM_012090,INTRONIC;SVTYPE=ALU;SVLEN=279;MEINFO=AluY,1,280,-;DIFF=0.95:c53t,g58a,i65gt,t86g,c98t,g139a,g162a,g199t,c206t;LP=27;RP=47;RA=-0.8;PRIOR=false;SR=4;AF=0.00434028;AC=5	.	.	.	.	.	0.00434028	.
1	39306628	ALU	TSD=TTTTTTTTTTTTTTTTTT;ASSESS=5;INTERNAL=NM_012090,INTRONIC;SVTYPE=ALU;SVLEN=279;MEINFO=AluY,1,280,+;DIFF=1:g9a,c10t,c20t,g196c,g199t,c206t,c218g,g237a;LP=111;RP=96;RA=0.209;PRIOR=false;SR=25;AF=0.0199653;AC=23	.	.	.	.	.	0.0199653	.
1	39331200	ALU	TSD=TTTTTTTTTTTTTTTTT;ASSESS=5;INTERNAL=NM_012090,INTRONIC;SVTYPE=ALU;SVLEN=279;MEINFO=AluY,1,280,-;DIFF=0.91:g5a,c10t,c20t,g54a,c57t,i65gt,t86g,t93c,c98t,g139a,g199t,c213t,c230t,c236t,g237a,c238t,c260t,g277a,d281;LP=14;RP=38;RA=-1.441;PRIOR=false;SR=14;AF=0.0104167;AC=12	.	.	.	0.00420294	.	0.0104167	0.00197441
1	39364385	ALU	TSD=TTTTTTTTTTTT;ASSESS=5;INTERNAL=NM_012090,INTRONIC;SVTYPE=ALU;SVLEN=268;MEINFO=AluY,12,280,-;DIFF=0.89:c20t,c30t,t86g,g91a,t93c,c98t,t101a,c154t,g214a;LP=207;RP=215;RA=-0.055;PRIOR=false;SR=51;AF=0.0121528;AC=14	.	.	.	.	.	0.0121528	.
1	39369019	ALU	TSD=TTTTTTTTTTTTTTTTTTTT;ASSESS=5;INTERNAL=MACF1,INTRONIC;SVTYPE=ALU;SVLEN=279;MEINFO=AluSz,1,280,+;DIFF=0.68:c4t,g11a,c16t,c20t,g54a,c57t,g58a,t65g,g93a,c95t,i129aaa,g140a,c143t,c151t,c153g,g190t,d197-282;LP=51;RP=90;RA=-0.819;PRIOR=false;SR=8;AF=0.000150105;AC=1	.	.	.	0.000150105	.	.	.
1	39420562	SVA	TSD=null;ASSESS=4;INTERNAL=MACF1,INTRONIC;SVTYPE=SVA;SVLEN=1267;MEINFO=SVA,48,1315,-;DIFF=0.23:n1-1023,a1053g,g1067a,a1079g,c1129g,c1157t,g1268a;LP=12;RP=4;RA=1.585;PRIOR=false;SR=2;AF=0.000150105;AC=1	.	.	.	0.000150105	.	.	.
1	39423900	ALU	TSD=null;ASSESS=3;INTERNAL=MACF1,INTRONIC;SVTYPE=ALU;SVLEN=268;MEINFO=AluY,12,280,+;DIFF=0.71:c23t,g54a,g65a,g110a,g143a,c150t,g190a,c198t,c205a,c206t;LP=1;RP=19;RA=-4.248;PRIOR=false;SR=4;AF=1.04167e-05;AC=1	.	.	.	.	.	.	1.04167e-05
1	39440129	ALU	TSD=TTTTTTTTTTTTTTTTTT;ASSESS=5;INTERNAL=NM_012090,INTRONIC;SVTYPE=ALU;SVLEN=279;MEINFO=AluY,1,280,-;DIFF=0.94:c53t,t93c,c98t,c138t,g151a,g162a,g199t,g214a,c238t,g261c,g269a;LP=54;RP=48;RA=0.17;PRIOR=false;SR=9;AF=0.0269097;AC=31	0.057508	.	.	.	0.0396825	0.0269097	.
1	39441811	ALU	TSD=AAGATCATTATTCTTT;ASSESS=5;INTERNAL=MACF1,INTRONIC;SVTYPE=ALU;SVLEN=277;MEINFO=AluYb8,4,281,-;DIFF=1:c57t,c64t,c98a,t144c,g211a,c236t,c248g,i252gcagtcc,g253a,a252g;LP=79;RP=84;RA=-0.089;PRIOR=false;SR=92;AF=0.00105074;AC=7	.	.	.	0.00105074	.	.	.
1	39442091	ALU	TSD=null;ASSESS=3;INTERNAL=MACF1,INTRONIC;SVTYPE=ALU;SVLEN=279;MEINFO=AluY,1,280,+;DIFF=0.82:c96a,g99a,c174t,g199t,g214a,c218t,a247c,c276t;LP=10;RP=11;RA=-0.138;PRIOR=false;SR=3;AF=1.00735e-05;AC=1	.	.	.	.	.	.	1.00735e-05
1	39533946	ALU	TSD=null;ASSESS=4;INTERNAL=NR_003929,INTRONIC;SVTYPE=ALU;SVLEN=279;MEINFO=AluY,1,280,+;DIFF=1:g9a,c10t,t29c,t38g,g49a,c57a,g58a,g79a,c98t,c109t,c142t,g199t,g207a,c218g,g237a,c260a,c268t,g277a;LP=53;RP=35;RA=0.599;PRIOR=false;SR=4;AF=0.0052356;AC=6	.	.	.	.	.	0.0052356	.
1	39592798	ALU	TSD=GAAAATCCCAGAACA;ASSESS=5;INTERNAL=null,null;SVTYPE=ALU;SVLEN=279;MEINFO=AluY,1,280,+;DIFF=1:g207a;LP=63;RP=76;RA=-0.271;PRIOR=false;SR=21;AF=0.000199681;AC=1	0.000199681	.	.	.	.	.	.
1	39597206	ALU	TSD=null;ASSESS=3;INTERNAL=null,null;SVTYPE=ALU;SVLEN=279;MEINFO=AluY,1,280,-;DIFF=0.95:g58a,a76t,t86g,t93c,g199t,c260t,c268t,g269a;LP=30;RP=53;RA=-0.821;PRIOR=false;SR=7;AF=0.0112847;AC=13	.	.	.	.	.	0.0112847	.
1	39597874	ALU	TSD=null;ASSESS=4;INTERNAL=null,null;SVTYPE=ALU;SVLEN=279;MEINFO=AluY,1,280,+;DIFF=0.8:c57t,i65gt,c98t,g139a,g151a,g199t,g207a,c213t,c250a,c268t,g277a;LP=41;RP=81;RA=-0.982;PRIOR=false;SR=6;AF=0.000599042;AC=3	0.000599042	.	.	.	.	.	.
1	39601580	ALU	TSD=A;ASSESS=5;INTERNAL=HEYL,TERMINATOR;SVTYPE=ALU;SVLEN=279;MEINFO=AluY,1,280,-;DIFF=0.83:g9a,c57t,c98t,c109t,c138t,g143a,c150t,g152c,g153a,g155c,g162a,g199t,g207a,g224a,c229a,g231a,g233a,c238t,c248a,t249a,g253a,c260t;LP=19;RP=9;RA=1.078;PRIOR=false;SR=12;AF=0.0516517;AC=344	.	.	.	0.0516517	.	.	.
1	39676157	ALU	TSD=AAAAAAAAAAAAAAAAAAA;ASSESS=5;INTERNAL=NM_001282396,TERMINATOR;SVTYPE=ALU;SVLEN=279;MEINFO=AluY,1,280,+;DIFF=0.96:g58a,c98t,g143a,g151a,c154t,g155a,g175a,c181t,c187t,g199a,c213t,c222t,g231a,c236t,g237a,g239a,g253a,g261a,c268t,c276t;LP=63;RP=53;RA=0.249;PRIOR=false;SR=24;AF=0.00143266;AC=2	0.00279553	0.00143266	0.000899281	.	.	.	.
1	39684227	LINE1	TSD=null;ASSESS=3;INTERNAL=HPCAL4,INTRONIC;SVTYPE=LINE1;SVLEN=3046;MEINFO=L1Ambig,2972,6018,+;DIFF=0.05:n1-3798,c3821g,t3843g,t3868c,n3875-3919,a3930g,c3931t,a3935c,c3938t,c3943t,c3954t,g3956a,c3959g,c3983a,g3984a,n3996-6019;LP=3;RP=8;RA=-1.415;ISTP=0;PRIOR=false;SR=5;AF=2.01988e-05;AC=2	.	.	.	.	.	.	2.01988e-05
1	39715864	ALU	TSD=null;ASSESS=3;INTERNAL=null,null;SVTYPE=ALU;SVLEN=279;MEINFO=AluSg,1,280,+;DIFF=0.7:c4t,c8t,g11a,d65-66,c80t,i129a,c139t,g141c,c143t,c151t,g152a,c153a,g154a,c155t,c197t,c231t,t245a,g270a,c277a;LP=42;RP=98;RA=-1.222;PRIOR=false;SR=4;AF=0.000599042;AC=3	0.000599042	.	.	.	.	.	.
1	39783529	SVA	TSD=AATAGTTGACTTTT;ASSESS=5;INTERNAL=NM_001720,INTRONIC;SVTYPE=SVA;SVLEN=1240;MEINFO=SVA,75,1315,-;DIFF=0.29:n1-874,g880c,a886g,g898a,c920t,t922g,a931g,a934t,g938a,c945a,g1009t,c1019t,a1041g,a1053g,g1067a,a1068g,a1079g,a1102g,a1116g,c1129g,a1132g,c1157t,a1178g,g1268a,t1292c;LP=18;RP=1;RA=4.17;PRIOR=false;SR=15;GENE=BMP8B;AF=0.000199681;AC=1	0.000199681	.	.	.	.	.	.
1	39796628	SVA	TSD=GAATGGCTATTATTTTTTT;ASSESS=5;INTERNAL=null,null;SVTYPE=SVA;SVLEN=1240;MEINFO=SVA,75,1315,-;DIFF=0.39:n1-981,g1009t,c1019t,a1053g,g1067a,a1079g,c1129g,c1157t,c1182a,g1268a,t1292c;LP=15;RP=19;RA=-0.341;PRIOR=false;SR=8;AF=0.000716332;AC=1	0.000199681	0.000716332	.	.	.	.	.
1	39826548	ALU	TSD=AAAAAAAGAAAAAAAAA;ASSESS=5;INTERNAL=null,null;SVTYPE=ALU;SVLEN=279;MEINFO=AluY,1,280,-;DIFF=1:c4t,c8t,g11a,g49a,g54a,c57t,i65gt,c98t,g199a,g214a,c260t,c268t,c276t;LP=31;RP=34;RA=-0.133;PRIOR=false;SR=18;AF=0.00260417;AC=3	.	.	.	.	.	0.00260417	.
1	39838440	ALU	TSD=AAAAGGTTGATTTC;ASSESS=5;INTERNAL=NM_017646,TERMINATOR;SVTYPE=ALU;SVLEN=281;MEINFO=AluYa4_4,0,281,+;DIFF=1:c57t,c96a,g145a,c174t,g237c;LP=25;RP=20;RA=0.322;PRIOR=false;SR=19;AF=0.000599042;AC=3	0.000599042	.	0.105665	.	.	.	.
1	39863752	ALU	TSD=null;ASSESS=3;INTERNAL=NM_017646,INTRONIC;SVTYPE=ALU;SVLEN=270;MEINFO=AluY,10,280,-;DIFF=0.96:g21a,c48t,c53t,g58t,i65gt,a76t,c78t,t86g,t93c,c98t,c206t,g237a,c238t,c268t,g269a,c276t;LP=55;RP=43;RA=0.355;PRIOR=false;SR=23;AF=0.0112847;AC=13	.	.	.	.	.	0.0112847	.
1	39877350	ALU	TSD=null;ASSESS=4;INTERNAL=NM_017646,INTRONIC;SVTYPE=ALU;SVLEN=279;MEINFO=AluY,1,280,-;DIFF=0.68:c4t,g49a,c53t,a76t,c78t,t93c,c98t,g110a,g139a,g143a,g151a,g152t,g155a,g168a,g175a;LP=109;RP=106;RA=0.04;PRIOR=false;SR=16;AF=0.000199681;AC=1	0.000199681	.	.	.	.	.	.
1	39880293	ALU	TSD=AAAAAAAAAAAAAAAAAAAAAAAAA;ASSESS=5;INTERNAL=TRIT1,INTRONIC;SVTYPE=ALU;SVLEN=279;MEINFO=AluY,1,280,+;DIFF=0.99:g11a,c53t,c98t,c109t,g110a,c138t,g139a,c142t,g145a,c150t,g151a,g153a,c174t,g199t,g207a,g214a,c218g,g231a,g237a,g239a,c273a,g277a;LP=25;RP=41;RA=-0.714;PRIOR=false;SR=52;AF=0.00315221;AC=21	.	.	.	0.00315221	.	.	.
1	39888773	ALU	TSD=CCAACACTAGCTTTTT;ASSESS=5;INTERNAL=NM_017646,PROMOTER;SVTYPE=ALU;SVLEN=278;MEINFO=AluYa5,3,281,-;DIFF=1:t89c,c96a,c98t,g145a,c174t,g237c;LP=1034;RP=783;RA=0.401;PRIOR=false;SR=901;AF=0.108166;AC=151	0.0798722	0.108166	0.0355216	0.217502	0.103175	0.0625	.
1	39895532	SVA	TSD=null;ASSESS=3;INTERNAL=NM_001033082,3_UTR;SVTYPE=SVA;SVLEN=1240;MEINFO=SVA,75,1315,+;DIFF=0.34:n1-831,g840c,t847g,t862c,g880c,g938a,c945a,t970c,t985c,g1009t,n1021-1044,a1053g,g1067a,a1079g,t1100g,c1129g,c1146a,c1163a,c1164t,t1267c,g1268a,g1310t;LP=3;RP=14;RA=-2.222;PRIOR=false;SR=6;AF=0.000716332;AC=1;GENE=MYCL	0.000199681	0.000716332	.	.	.	.	.
1	40000645	ALU	TSD=AAAAAAAAAAAAAAAAAAA;ASSESS=5;INTERNAL=null,null;SVTYPE=ALU;SVLEN=279;MEINFO=AluSz,1,280,+;DIFF=0.98:g5a,c8t,g11a,c48t,t65g,t78a,i129a,g140a,c153g,c197t,g215a,c237t,g238a,g262a,g268a,c269t,g270a,c277t;LP=58;RP=92;RA=-0.666;PRIOR=false;SR=27;AF=0.0112847;AC=13	.	.	.	.	.	0.0112847	.
1	40002382	LINE1	TSD=GAAAAGTTCCCCTA;ASSESS=5;INTERNAL=null,null;SVTYPE=LINE1;SVLEN=551;MEINFO=L1Ta,5468,6019,+;DIFF=0.09:n1-5468,g5586a,t5628c,c5945t;LP=11;RP=9;RA=0.29;ISTP=0;PRIOR=false;SR=14;AF=0.000199681;AC=1	0.000199681	.	.	.	.	.	.
1	40014257	ALU	TSD=TTCATTTATTTTCT;ASSESS=5;INTERNAL=null,null;SVTYPE=ALU;SVLEN=279;MEINFO=AluY,1,280,+;DIFF=1:c48t,g54a,c57t,i65gt,a76t,t86g,t93c,c98g,t113g;LP=34;RP=48;RA=-0.497;PRIOR=false;SR=11;AF=0.000868056;AC=1	.	.	.	0.000150105	.	0.000868056	.
1	40027842	SVA	TSD=null;ASSESS=4;INTERNAL=null,null;SVTYPE=SVA;SVLEN=1240;MEINFO=SVA,75,1315,-;DIFF=0.34:n1-1013,n1032,a1053g,g1067a,a1079g,c1129g,c1146a,c1163a,c1164t,t1267c,g1268a,g1310t;LP=15;RP=21;RA=-0.485;PRIOR=false;SR=5;AF=0.00173611;AC=2	0.000399361	.	.	.	.	0.00173611	.
1	40059032	ALU	TSD=TGCAAATTCTAACTTTCT;ASSESS=5;INTERNAL=NM_001105530,INTRONIC;SVTYPE=ALU;SVLEN=280;MEINFO=AluYh3,1,281,-;DIFF=0.86:c48a,c64t,g99a,t111c,g145c,g176a,g237c,c260t,c276t;LP=2958;RP=2604;RA=0.184;PRIOR=false;SR=3864;AF=0.141834;AC=198;GENE=CAP1	0.146965	0.141834	0.0526079	0.151456	0.0714286	0.107639	.
1	40087874	SVA	TSD=null;ASSESS=4;INTERNAL=NM_001142604,INTRONIC;SVTYPE=SVA;SVLEN=1240;MEINFO=SVA,75,1315,+;DIFF=0.48:n1-823,g840c,t847g,t862c,g880c,g938a,c945a,t970c,t985c,g1009t,a1053g,g1067a,a1079g,c1129g,c1146a,c1163a,c1164t,t1267c,g1268a,g1310t;LP=24;RP=16;RA=0.585;PRIOR=false;SR=10;AF=0.000718391;AC=1;GENE=PPT1	0.00019976	0.000718391	.	.	.	.	.
1	40093904	LINE1	TSD=null;ASSESS=4;INTERNAL=PPT1,INTRONIC;SVTYPE=LINE1;SVLEN=3428;MEINFO=L1Ambig,2590,6018,-;DIFF=0.02:n1-2589,g2611c,n2664-2667,g2723a,n2745-6019;LP=3;RP=2;RA=0.585;ISTP=0;PRIOR=false;SR=1;AF=0.00930651;AC=62	.	.	.	0.00930651	.	.	.
1	40132658	ALU	TSD=null;ASSESS=4;INTERNAL=RLF,PROMOTER;SVTYPE=ALU;SVLEN=228;MEINFO=AluY,53,281,-;DIFF=0.73:c4t,g54a,c138t,g151a,g153a,g155a,g162a,c174t,g175a,g189t,g196t,g199t;LP=19;RP=70;RA=-1.881;PRIOR=false;SR=123;AF=0.000150105;AC=1	.	.	.	0.000150105	.	.	.
1	40147809	ALU	TSD=TATTCTCCTCTTT;ASSESS=5;INTERNAL=null,null;SVTYPE=ALU;SVLEN=280;MEINFO=AluYb7_4,1,281,-;DIFF=1:c57t,c64t,c98a,t144c,c236t,i252gcagtcc,c248g,a252g;LP=3;RP=12;RA=-2;PRIOR=false;SR=7;AF=0.000868056;AC=1	0.000199681	.	.	0.00240168	.	0.000868056	.
1	40178648	ALU	TSD=null;ASSESS=4;INTERNAL=NM_012421,INTRONIC;SVTYPE=ALU;SVLEN=269;MEINFO=AluY,11,280,+;DIFF=0.91:t17g,c20t,g51a,c53t,c57t,c98t,g199a,g237a,c268t,g269a,g277a;LP=32;RP=29;RA=0.142;PRIOR=false;SR=12;AF=0.0425347;AC=49	0.0113818	.	.	0.0682978	.	0.0425347	.
1	40212908	ALU	TSD=CCAGATGTAGTTT;ASSESS=5;INTERNAL=NM_012421,INTRONIC;SVTYPE=ALU;SVLEN=279;MEINFO=AluYa4_5,2,281,-;DIFF=1:t89c,c96a,g145a,c174t;LP=7;RP=10;RA=-0.515;PRIOR=false;SR=9;AF=0.000716332;AC=1;GENE=RLF	0.000399361	0.000716332	.	0.00120084	.	.	.
1	40224654	ALU	TSD=TTTTTTTTTTTTTTTTTTTTTTTTTTTTTTT;ASSESS=5;INTERNAL=NM_012421,INTRONIC;SVTYPE=ALU;SVLEN=279;MEINFO=AluY,1,280,+;DIFF=1:g5a,c98t,g151a,g155a,g162a,g196c,g199t,c206t,g214a,c218g,g277a;LP=32;RP=38;RA=-0.248;PRIOR=false;SR=67;AF=0.0723496;AC=101;GENE=RLF	.	0.0723496	.	.	.	0.00886525	.
1	40232529	ALU	TSD=TCAAAGCTTATTCTT;ASSESS=5;INTERNAL=RLF,INTRONIC;SVTYPE=ALU;SVLEN=68;MEINFO=AluSz,213,281,-;DIFF=0.88:c4a,c10t,c20t,g49a,t65g,g88t,g93a,c95t,g101a,c111t,g112a,c114t,i121a,t126a,c128a,g140a,g142t,g144a,t145a,g146a,g152a,c153g,c155t,c175t,g198a,c205t,c207t,g219c,c237t,c244t,i252gcagtcc,a253g,g262a,c248g;LP=16;RP=8;RA=1;PRIOR=false;SR=29;AF=0.000450315;AC=3	.	.	.	0.000450315	.	.	.
1	40247696	ALU	TSD=AAAGA;ASSESS=5;INTERNAL=NM_001008740,PROMOTER;SVTYPE=ALU;SVLEN=281;MEINFO=AluSz,0,281,+;DIFF=1:c48t,c53t,c57t,t65g,i129aaa,c153g,g198a,g208a,g215a,g219c,g262a,c277t;LP=37;RP=108;RA=-1.545;PRIOR=false;SR=15;AF=0.000199681;AC=1	0.000199681	.	.	.	.	.	.
1	40257426	ALU	TSD=AAGTAAGACGCTTTC;ASSESS=5;INTERNAL=NM_005857,PROMOTER;SVTYPE=ALU;SVLEN=280;MEINFO=AluYa1_1,1,281,-;DIFF=1:d87-96,a132g,g145a,d281;LP=4;RP=14;RA=-1.807;PRIOR=false;SR=8;AF=0.000868056;AC=1	.	.	.	.	.	0.000868056	.
1	40263319	ALU	TSD=CATAGTTTTT;ASSESS=5;INTERNAL=NM_005857,INTRONIC;SVTYPE=ALU;SVLEN=272;MEINFO=AluYa5,9,281,-;DIFF=1:t89c,c96a,c108t,g145a,c174t,g237c,i127a;LP=25;RP=17;RA=0.556;PRIOR=false;SR=27;AF=0.000199681;AC=1	0.000199681	.	.	.	.	.	.
1	40273538	SVA	TSD=dTATATATATATAT;ASSESS=5;INTERNAL=ZMPSTE24,INTRONIC;SVTYPE=SVA;SVLEN=131;MEINFO=SVA,1184,1315,+;DIFF=0:n1-1183,g1191a,t1223c,g1268a,t1290c,t1292c;LP=2;RP=1;RA=1;PRIOR=false;SR=6;AF=0.210186;AC=1399	.	.	.	0.210186	.	.	.
1	40298548	ALU	TSD=TTTTTTTTTTTTTTTTTTTTTTT;ASSESS=5;INTERNAL=NM_001852,TERMINATOR;SVTYPE=ALU;SVLEN=279;MEINFO=AluY,1,280,+;DIFF=0.97:g5a,c57t,c78t,g99a,g110a,i127aa,c174t,g189a,g190a,g196c,g197a,c198t,g199t,c206t,c230t,c236t,c238t,c240t,c260a;LP=75;RP=94;RA=-0.326;PRIOR=false;SR=17;AF=0.000199681;AC=1	0.000199681	.	.	0.00240168	.	.	.
1	40321137	ALU	TSD=dTATATATA;ASSESS=5;INTERNAL=COL9A2,PROMOTER;SVTYPE=ALU;SVLEN=279;MEINFO=AluSz,1,280,-;DIFF=0.95:g5a,g9a,c48t,c53t,g58a,t65g,g93a,c95t,c111t,g112a,i129aa,c143t,g152a,c153t,c155t,g156a,a163g,c197t,g208a,g212a,c214t,g219c,c231t,c239t,g262a,i265a,c269t,g272a,c277t,d282;LP=10;RP=9;RA=0.152;PRIOR=false;SR=10;AF=0.0551193;AC=365	.	.	.	0.0551193	.	.	.
1	40335645	ALU	TSD=TTTTTTTTTTTTTTTTTTTTTT;ASSESS=5;INTERNAL=null,null;SVTYPE=ALU;SVLEN=277;MEINFO=AluSc,3,280,-;DIFF=0.94:c48t,c53t,c57t,g58a,d65-66,t78a,g112a,i129a,c139t,c151t,c153g,c155t,a163g,c197t,c207t,g213a,g215a,g262a,g270a,c274t,g278a;LP=47;RP=64;RA=-0.445;PRIOR=false;SR=27;AF=0.00520833;AC=6	.	.	.	.	.	0.00520833	.
1	40345994	ALU	TSD=TTTTTTTTTTTTTTTTTTTTTTTTTTTT;ASSESS=5;INTERNAL=null,null;SVTYPE=ALU;SVLEN=279;MEINFO=AluY,1,280,+;DIFF=1:i65gt,c98t,g139a,g269a;LP=31;RP=27;RA=0.199;PRIOR=false;SR=17;AF=0.0113852;AC=12	.	.	.	.	.	0.0113852	.
1	40427521	ALU	TSD=null;ASSESS=4;INTERNAL=NM_001198980,TERMINATOR;SVTYPE=ALU;SVLEN=279;MEINFO=AluY,1,280,+;DIFF=0.83:g5a,c10t,g21a,c48t,c64t,g79a,g143a,g151a,c154t,g196t,g199t,g207a,c238g,c260g;LP=78;RP=67;RA=0.219;PRIOR=false;SR=6;AF=0.0546875;AC=63	.	.	.	.	.	0.0546875	.
1	40432613	ALU	TSD=dTTATGTCTATTTGGTTTCC;ASSESS=5;INTERNAL=null,null;SVTYPE=ALU;SVLEN=279;MEINFO=AluY,1,280,+;DIFF=0.96:g5t,c8t,a76t,t86g,t93c,c98t,g139a,g153a,c154t,g199t,g237a,g261a,c268t,c276t;LP=12;RP=32;RA=-1.415;PRIOR=false;SR=7;AF=0.00954861;AC=11	.	.	.	.	.	0.00954861	.
1	40453422	ALU	TSD=null;ASSESS=4;INTERNAL=NM_023070,INTRONIC;SVTYPE=ALU;SVLEN=279;MEINFO=AluY,1,280,-;DIFF=0.91:g5a,c8g,g21a,g54a,a76t,c78t,c98t,c174t,g196c,g199t,g214a;LP=95;RP=94;RA=0.015;PRIOR=false;SR=14;AF=0.000599042;AC=3	0.000599042	.	.	.	.	.	.
1	40458426	ALU	TSD=AATAAATCGACTCCA;ASSESS=5;INTERNAL=NM_023070,INTRONIC;SVTYPE=ALU;SVLEN=281;MEINFO=AluYa5,0,281,+;DIFF=1:a33g,t89c,c96a,c108t,g145a,c174t,g237c;LP=119;RP=96;RA=0.31;PRIOR=false;SR=90;AF=0.00139776;AC=7	0.00139776	.	.	0.002852	.	.	.
1	40536528	ALU	TSD=null;ASSESS=4;INTERNAL=NM_152373,INTRONIC;SVTYPE=ALU;SVLEN=278;MEINFO=AluY,2,280,+;DIFF=0.9:g5t,c8t,c48t,g58a,c98t,g143a,g152t,c174t,g175a,g199a,g207a,g214a,g221a,g239a,g269a,c276t;LP=51;RP=44;RA=0.213;PRIOR=false;SR=13;AF=0.00434028;AC=5	.	.	.	0.000450315	.	0.00434028	.
1	40570407	ALU	TSD=TTTTTGTTTTTTTTTTTTTCTTTTTT;ASSESS=5;INTERNAL=null,null;SVTYPE=ALU;SVLEN=279;MEINFO=AluY,1,280,+;DIFF=0.95:g9a,g54a,i65gt,t86g,t93c,c98t,g151a,c218g,c236a,c276t,g277t;LP=57;RP=71;RA=-0.317;PRIOR=false;SR=9;AF=0.00520833;AC=6	.	.	.	.	.	0.00520833	.
1	40571616	SVA	TSD=null;ASSESS=3;INTERNAL=ZNF684,TERMINATOR;SVTYPE=SVA;SVLEN=394;MEINFO=SVA,921,1315,-;DIFF=0.23:n1-920,g938a,c945a,d954,n955,t957c,g995a,c999g,n1005-1021,a1053g,c1056a,g1067a,a1079g,g1082t,t1109a,c1129g,g1196a,t1197a,n1209,a1213g,n1219,n1221,t1223a,n1226,n1231,t1232a,n1233-1233,n1240,c1252t,g1263a,g1268a,a1280c,g1291c,t1292c,n1316-1316;LP=15;RP=11;RA=0.447;PRIOR=false;SR=5;AF=0.0103573;AC=69	.	.	.	0.0103573	.	.	.
1	40573079	HERVK	TSD=null;ASSESS=3;INTERNAL=null,null;SVTYPE=HERVK;SVLEN=389;MEINFO=HERVK,8369,8758,+;DIFF=0:n1-8368,a8373c,n8376,g8379t,c8390a,c8393t,g8394t,a8398t,n8404,c8408a,t8410c,n8415,a8416g,n8423-8423,n8440-8539,c8543a,c8553t,c8554t,t8561c,n8575,g8614a,t8641c,c8645t,t8649c,c8650a,c8651a,t8655a,t8669c,n8685-8759;LP=571;RP=879;RA=-0.622;PRIOR=false;SR=81;AF=0.0078125;AC=9	.	.	.	0.00090063	.	0.0078125	.
1	40578456	ALU	TSD=null;ASSESS=3;INTERNAL=null,null;SVTYPE=ALU;SVLEN=270;MEINFO=AluYb8,10,280,+;DIFF=0.97:c57t,c64t,c98a,t144c,i207g,g211a,c236t,c248g,i252gcagtcc,a252g;LP=112;RP=149;RA=-0.412;PRIOR=false;SR=50;AF=0.00859599;AC=12	0.0147764	0.00859599	.	0.00195137	.	0.00173611	.
1	40679618	ALU	TSD=CATGTATTTTC;ASSESS=5;INTERNAL=NR_024567,TERMINATOR;SVTYPE=ALU;SVLEN=280;MEINFO=AluYb8,1,281,-;DIFF=1:g55a,c57t,c64t,c98a,t144c,g211a,c236t,i252gcagtcc,c248g,a252g;LP=33;RP=41;RA=-0.313;PRIOR=false;SR=31;AF=0.00143266;AC=2;GENE=RIMS3	.	0.00143266	.	0.000750525	.	0.00347222	.
1	40712658	LINE1	TSD=null;ASSESS=3;INTERNAL=NFYC,INTRONIC;SVTYPE=LINE1;SVLEN=3476;MEINFO=L1Ambig,2542,6018,+;DIFF=0.02:n1-2541,c2565a,g2611c,a2652g,n2693-2812,c2820t,c2835a,n2885,t2902c,n2964-6019;LP=1;RP=4;RA=-2;ISTP=0;PRIOR=false;SR=1;AF=0.00240168;AC=16	.	.	.	0.00240168	.	.	.
1	40753799	SVA	TSD=CATCAGTACCTTTT;ASSESS=5;INTERNAL=NFYC,INTRONIC;SVTYPE=SVA;SVLEN=839;MEINFO=SVA,476,1315,-;DIFF=0.44:n1-481,a487c,c489t,a513g,a561c,t564c,a578g,t580c,t582c,n635-700,t703c,c714t,n723,t729c,g764c,a773g,g840c,t847g,t862c,g880c,n914-996,g1009t,a1053g,g1067a,a1079g,c1129g,c1146a,c1163a,c1164t,t1267c,g1268a,g1310t;LP=12;RP=9;RA=0.415;PRIOR=false;SR=13;AF=0.000150105;AC=1	.	.	.	0.000150105	.	.	.
1	40851677	ALU	TSD=GTAAAGTCTT;ASSESS=5;INTERNAL=CITED4,TERMINATOR;SVTYPE=ALU;SVLEN=208;MEINFO=AluYe,73,281,-;DIFF=0.74:c8t,g11a,g41c,c48t,c53t,c57t,c70g,t144a,g207a,a210g,t219c,c236t,d265;LP=15;RP=14;RA=0.1;PRIOR=false;SR=22;AF=0.000150105;AC=1	.	.	.	0.000150105	.	.	.
1	40936244	ALU	TSD=null;ASSESS=4;INTERNAL=CTPS1,PROMOTER;SVTYPE=ALU;SVLEN=279;MEINFO=AluY,1,280,-;DIFF=0.15:g9a,g21a,g25a,g45a,g49a,c174t,g237c,c246a,c268a,t278a;LP=3;RP=3;RA=0;PRIOR=false;SR=1;AF=0.000150105;AC=1	.	.	.	0.000150105	.	.	.
1	40937514	SVA	TSD=AAAAGTAACTGCA;ASSESS=5;INTERNAL=null,null;SVTYPE=SVA;SVLEN=247;MEINFO=SVA,1068,1315,+;DIFF=0.16:n1-1067,a1079g,c1129g,c1146a,c1163a,c1164t,t1235a,t1267c,g1268a,g1310t;LP=1;RP=10;RA=-3.322;PRIOR=false;SR=5;AF=0.015873;AC=2	0.00119808	.	.	0.00210147	0.015873	.	.
1	40956326	ALU	TSD=null;ASSESS=3;INTERNAL=null,null;SVTYPE=ALU;SVLEN=279;MEINFO=AluY,1,280,+;DIFF=0.99:c4t,g5a,g9a,c10t,c20t,c23t,g49a,c53t,i65gg,c98a,g162a,c174t,g214a,c260t,c268t,c276t,g277a;LP=29;RP=57;RA=-0.975;PRIOR=false;SR=14;AF=0.000868056;AC=1	.	.	.	.	.	0.000868056	.
1	40982316	SVA	TSD=null;ASSESS=4;INTERNAL=NR_125440,INTRONIC;SVTYPE=SVA;SVLEN=1240;MEINFO=SVA,75,1315,-;DIFF=0.35:n1-886,g898a,n909,t922g,a931g,n932,a934t,g938a,c945a,g1009t,c1019t,a1053g,g1067a,a1079g,t1140g,c1157t,c1190t,a1238g,g1268a,c1287t,t1292c;LP=19;RP=6;RA=1.663;PRIOR=false;SR=12;AF=0.000716332;AC=1;GENE=CTPS1	0.000199681	0.000716332	.	.	.	.	.
1	41037053	LINE1	TSD=AAAAAGTGACTGATT;ASSESS=5;INTERNAL=NM_001172219,INTRONIC;SVTYPE=LINE1;SVLEN=6013;MEINFO=L1Ta1d,6,6019,+;DIFF=0.11:n1-6,c63t,t231c,g355a,g370a,t400a,n430-432,n475,n583-6019;LP=431;RP=275;RA=0.648;ISTP=0;PRIOR=false;SR=414;AF=0.015043;AC=21;GENE=SLFNL1-AS1	0.0159744	0.015043	.	0.0574902	.	0.00434028	.
1	41037308	LINE1	TSD=null;ASSESS=0;INTERNAL=SCMH1,INTRONIC;SVTYPE=LINE1;SVLEN=3667;MEINFO=L1Ambig,2351,6018,+;DIFF=0.03:n1-5773,n5803,n5821,n5831,n5843,n5850-5930;LP=2;RP=7;RA=-1.807;ISTP=-1;PRIOR=false;SR=0;AF=1.00737e-05;AC=1	.	.	.	.	.	.	1.00737e-05
1	41046310	SVA	TSD=null;ASSESS=3;INTERNAL=SCMH1,INTRONIC;SVTYPE=SVA;SVLEN=907;MEINFO=SVA,409,1316,-;DIFF=0.15:n1-415,n421,n487-495,a513g,c531t,a561c,t564c,a578g,t580c,t582c,n613-676,n681,g717a,t729c,c756t,g764c,a773g,a802g,n808-1316;LP=1;RP=21;RA=-4.392;PRIOR=false;SR=11;AF=7.13005e-05;AC=7	.	.	.	.	.	.	7.13005e-05
1	41079113	ALU	TSD=AAAGAATTATCA;ASSESS=5;INTERNAL=NM_001172219,INTRONIC;SVTYPE=ALU;SVLEN=176;MEINFO=AluYb,105,281,+;DIFF=0.63:t144c,g211a,c236t,i252gcagtcc,c248g,a252g;LP=8;RP=9;RA=-0.17;PRIOR=false;SR=13;AF=0.000199681;AC=1	0.000199681	.	.	.	.	.	.
1	41134196	ALU	TSD=CCACATGATTATCTT;ASSESS=5;INTERNAL=SCMH1,INTRONIC;SVTYPE=ALU;SVLEN=279;MEINFO=AluYb8,2,281,-;DIFF=1:c57t,c64t,c98a,t144c,g211a,c236t,c248g,i252gcagtcc,g253a,a252g;LP=13;RP=11;RA=0.241;PRIOR=false;SR=9;AF=0.000150105;AC=1	.	.	.	0.000150105	.	.	.
1	41153114	LINE1	TSD=AACATTACAATTT;ASSESS=5;INTERNAL=NM_001172219,INTRONIC;SVTYPE=LINE1;SVLEN=6019;MEINFO=L1Ta1d,0,6019,-;DIFF=0.1:t231c,t254a,n346,n375-6019;LP=11;RP=16;RA=-0.541;ISTP=0;PRIOR=false;SR=15;GENE=SCMH1;AF=0.000199681;AC=1	0.000199681	.	.	0.00030021	.	.	.
1	41184411	LINE1	TSD=A;ASSESS=5;INTERNAL=SCMH1,INTRONIC;SVTYPE=LINE1;SVLEN=78;MEINFO=L1Ambig,5941,6019,+;DIFF=0.01:n1-5941,c5945t;LP=3;RP=12;RA=-2;ISTP=0;PRIOR=false;SR=14;AF=0.00030021;AC=2	.	.	.	0.00030021	.	.	.
1	41192633	LINE1	TSD=AGGAAACTATTT;ASSESS=5;INTERNAL=NM_001172219,INTRONIC;SVTYPE=LINE1;SVLEN=-1;MEINFO=L1Ta,-1,6019,+;DIFF=0.1:n1-4938,n4964,n4967,n4993,n4998,t5160c,n5307-5714,n5720,n5733-5734,t5737g;LP=13;RP=20;RA=-0.621;ISTP=5250;PRIOR=false;SR=11;GENE=SCMH1;AF=0.000199681;AC=1	0.000199681	.	.	.	.	.	.
1	41198517	LINE1	TSD=AAAATTTGAATTTTCA;ASSESS=5;INTERNAL=NM_001172219,INTRONIC;SVTYPE=LINE1;SVLEN=6019;MEINFO=L1Ta1d,0,6019,+;DIFF=0.09:n1-26,c166t,n373-6019;LP=13;RP=13;RA=0;ISTP=0;PRIOR=false;SR=17;GENE=SCMH1;AF=0.000199681;AC=1	0.000199681	.	.	.	.	.	.
1	41218397	ALU	TSD=AAGAGTTAAAGACCA;ASSESS=5;INTERNAL=SCMH1,INTRONIC;SVTYPE=ALU;SVLEN=281;MEINFO=AluYa5,0,281,+;DIFF=1:t89c,c96a,g145a,c174t,g237c,i127a;LP=7;RP=7;RA=0;PRIOR=false;SR=13;AF=0.000150105;AC=1	.	.	.	0.000150105	.	.	.
1	41250744	LINE1	TSD=null;ASSESS=3;INTERNAL=null,null;SVTYPE=LINE1;SVLEN=610;MEINFO=L1Ta,5408,6018,+;DIFF=0.1:n1-5407,t5535g,g5538c,a6006g;LP=12;RP=19;RA=-0.663;ISTP=0;PRIOR=false;SR=7;AF=0.000716332;AC=1	0.000199681	0.000716332	.	.	.	.	.
1	41319848	LINE1	TSD=CCTCCCCCTCCTCATTTTTC;ASSESS=5;INTERNAL=null,null;SVTYPE=LINE1;SVLEN=6014;MEINFO=L1Ta1d,5,6019,-;DIFF=0.08:n1-2,t231c,t254a,n398-417,n568-6019;LP=11;RP=17;RA=-0.628;ISTP=0;PRIOR=false;SR=7;AF=0.000199681;AC=1	0.000199681	.	.	.	.	.	.
1	41375468	ALU	TSD=AAGAAAGAAAGAAAGAAAGA;ASSESS=5;INTERNAL=NM_001291281,INTRONIC;SVTYPE=ALU;SVLEN=279;MEINFO=AluY,1,280,+;DIFF=1:g54a,c57a,g58a,g79a,t86g,t93c,c98t,g110a,g151a,g152c,c206t,g237a,c238t,c260t,c268t;LP=19;RP=16;RA=0.248;PRIOR=false;SR=47;AF=0.00260417;AC=3	.	.	.	.	.	0.00260417	.
1	41513252	LINE1	TSD=null;ASSESS=4;INTERNAL=HIVEP3,EXON_9;SVTYPE=LINE1;SVLEN=5290;MEINFO=L1Ambig,728,6018,-;DIFF=0.09:n1-5251,a5258g,t5316a,n5323,n5325-5357,c5391t,n5434-5442,g5475c,c5513t,t5535c,g5538c,n5577-5714,n5843-6019;LP=18;RP=10;RA=0.848;ISTP=0;PRIOR=false;SR=19;AF=0.00143044;AC=142	.	.	.	.	.	.	0.00143044
1	41570747	ALU	TSD=AGAAGTGAGAACTGAC;ASSESS=5;INTERNAL=HIVEP3,INTRONIC;SVTYPE=ALU;SVLEN=281;MEINFO=AluYb8,0,281,+;DIFF=0.99:c57t,c64t,c98a,i127aa,t144c,g211a,c236t,c248g,i252gcagtcc,a252g;LP=6;RP=7;RA=-0.222;PRIOR=false;SR=8;AF=0.000150105;AC=1	.	.	.	0.000150105	.	.	.
1	41635783	ALU	TSD=AAGAAAGGTGATGTAA;ASSESS=5;INTERNAL=NM_001127714,INTRONIC;SVTYPE=ALU;SVLEN=281;MEINFO=AluYa5,0,281,+;DIFF=1:t89c,i94aaa,c96a,i127aa,g145a,c174t,g237c;LP=22;RP=36;RA=-0.71;PRIOR=false;SR=43;AF=0.00143266;AC=2;GENE=HIVEP3	0.00119808	0.00143266	.	.	.	.	.
1	41653169	ALU	TSD=CCCCAAATGTTTTTCT;ASSESS=5;INTERNAL=NM_001127714,INTRONIC;SVTYPE=ALU;SVLEN=281;MEINFO=AluYc1,0,281,-;DIFF=1:c87t,g148a;LP=27;RP=25;RA=0.111;PRIOR=false;SR=34;AF=0.00143266;AC=2;GENE=HIVEP3	0.000199681	0.00143266	.	0.00210147	.	0.00173611	.
1	41751344	ALU	TSD=TTTTTTTTTTTTTTTTTTTT;ASSESS=5;INTERNAL=NM_001127714,INTRONIC;SVTYPE=ALU;SVLEN=279;MEINFO=AluSz,1,280,+;DIFF=0.95:g9a,g15t,g54a,t65g,i129a,g152a,c153g,c197g,t200g,c231t,g240a,c269t;LP=57;RP=44;RA=0.373;PRIOR=false;SR=47;AF=0.125;AC=144	0.117013	.	0.107464	0.17157	.	0.125	.
1	41808474	LINE1	TSD=AAGAAAGCACTTGTC;ASSESS=5;INTERNAL=HIVEP3,INTRONIC;SVTYPE=LINE1;SVLEN=6018;MEINFO=L1Ta1d,1,6019,+;DIFF=0.06:n1,n353,n364,n379,n381,n425-6019;LP=16;RP=1;RA=4;ISTP=0;PRIOR=false;SR=13;AF=0.000150105;AC=1	.	.	.	0.000150105	.	.	.
1	41865737	LINE1	TSD=null;ASSESS=1;INTERNAL=HIVEP3,INTRONIC;SVTYPE=LINE1;SVLEN=4332;MEINFO=L1Ta,1687,6019,-;DIFF=0.1:n1-5541,t5582c,c5590t,n5693-5719,a5837c,t5909a,c5945t;LP=40;RP=37;RA=0.112;ISTP=-1;PRIOR=false;SR=0;AF=0.000450315;AC=3	.	.	.	0.000450315	.	.	.
1	41920854	ALU	TSD=CACTTCAGCTGTAATTT;ASSESS=5;INTERNAL=NR_038261,INTRONIC;SVTYPE=ALU;SVLEN=279;MEINFO=AluYg,2,281,-;DIFF=1:g52a,c83t,g152c,t173a,c229t,g271a;LP=15;RP=11;RA=0.447;PRIOR=false;SR=14;AF=0.000716332;AC=1;GENE=HIVEP3	0.000199681	0.000716332	.	.	.	.	.
1	41924647	ALU	TSD=AAGAAAGGTACCTACCC;ASSESS=5;INTERNAL=NR_038261,INTRONIC;SVTYPE=ALU;SVLEN=281;MEINFO=AluYa4_2,0,281,+;DIFF=1:t89c,c96a,t111c,g145a,g237c;LP=670;RP=811;RA=-0.276;PRIOR=false;SR=778;AF=0.0365329;AC=51;GENE=HIVEP3	0.0453275	0.0365329	0.0413669	0.0153107	0.0555556	0.0555556	.
1	41935612	LINE1	TSD=TAAATGTCTCTCTC;ASSESS=5;INTERNAL=NR_038261,INTRONIC;SVTYPE=LINE1;SVLEN=6019;MEINFO=L1Ta1d,0,6019,+;DIFF=0.09:g167a,t231c,t254a,n318,c324a,n340-6019;LP=78;RP=37;RA=1.076;ISTP=0;PRIOR=false;SR=62;AF=0.00286533;AC=4;GENE=HIVEP3	0.00119808	0.00286533	.	0.00615431	.	.	.
1	41948748	ALU	TSD=TGGAAATTACTT;ASSESS=5;INTERNAL=NR_038261,INTRONIC;SVTYPE=ALU;SVLEN=281;MEINFO=AluYa1_1,0,281,-;DIFF=1:g145a;LP=1834;RP=1701;RA=0.109;PRIOR=false;SR=2042;AF=0.0852436;AC=119;GENE=HIVEP3	0.0632987	0.0852436	.	0.196337	.	0.0260417	.
1	41966491	LINE1	TSD=TTTTTTTTTTTTTTTT;ASSESS=5;INTERNAL=HIVEP3,INTRONIC;SVTYPE=LINE1;SVLEN=3960;MEINFO=L1Ambig,2058,6018,+;DIFF=0.01:n1-5175,c5207t,a5242c,g5268a,n5272,t5275g,a5280g,a5283t,t5316a,a5317g,n5327-6019;LP=26;RP=57;RA=-1.132;ISTP=0;PRIOR=false;SR=276;AF=0.358151;AC=2386	.	.	0.298561	0.358151	.	.	.
1	42003786	ALU	TSD=null;ASSESS=3;INTERNAL=NR_038261,INTRONIC;SVTYPE=ALU;SVLEN=279;MEINFO=AluSg,1,280,+;DIFF=0.96:g9a,c57t,d65-66,c95t,i129a,c153g,a163g,g208a,g232a,c239t,d278-282;LP=20;RP=30;RA=-0.585;PRIOR=false;SR=3;AF=0.000868056;AC=1	.	.	.	.	.	0.000868056	.
1	42015073	LINE1	TSD=null;ASSESS=4;INTERNAL=HIVEP3,INTRONIC;SVTYPE=LINE1;SVLEN=685;MEINFO=L1Ambig,5334,6019,+;DIFF=0.04:n1-5331,n5585-5629,n5781-6019;LP=9;RP=1;RA=3.17;ISTP=-1;PRIOR=false;SR=8;AF=0.000150105;AC=1	.	.	.	0.000150105	.	.	.
1	42042175	ALU	TSD=dTATATATAT;ASSESS=5;INTERNAL=HIVEP3,PROMOTER;SVTYPE=ALU;SVLEN=279;MEINFO=AluY,1,280,-;DIFF=0.98:g5a,c8t,c10t,c16t,c20t,g49a,c53t,c78t,c98t,g143a,g162a,g196c,g197a,g199a,c205t,c213t,g217a,c218t,c230t,c236t,c238t,c240t,c251t,g257a,c260t,c268a,g277a;LP=7;RP=7;RA=0;PRIOR=false;SR=11;AF=0.0601921;AC=401	.	.	0.0103417	0.0601921	.	.	.
1	42104026	ALU	TSD=AAGATGTATTAAT;ASSESS=5;INTERNAL=null,null;SVTYPE=ALU;SVLEN=281;MEINFO=AluYb,0,281,+;DIFF=1:g54a,c150t,g162a,g199a,g207a,g208a,a232g,c236a,c248g,c255t,c263a,c268t;LP=11;RP=10;RA=0.138;PRIOR=false;SR=11;AF=0.000199681;AC=1	0.000199681	.	.	.	.	.	.
1	42194711	ALU	TSD=AAAATTTATCTGCCAT;ASSESS=5;INTERNAL=NM_001198850,INTRONIC;SVTYPE=ALU;SVLEN=281;MEINFO=AluYb7_4,0,281,+;DIFF=1:a28g,c57t,c64t,c98a,t144c,g199t,c236t,g237c,i252gcagtcc,c248g,a252g;LP=13;RP=7;RA=0.893;PRIOR=false;SR=5;AF=0.000199681;AC=1	0.000199681	.	.	.	.	.	.
1	42208119	ALU	TSD=AAAAAGATGATTA;ASSESS=5;INTERNAL=FOXJ3,INTRONIC;SVTYPE=ALU;SVLEN=281;MEINFO=AluYb6_2,0,281,+;DIFF=0.94:c18a,c57t,c64t,g65a,c98a,i127aaaa,t144c,g211a,c236t,i252gcagtcc,c248g,a252t;LP=7;RP=8;RA=-0.193;PRIOR=false;SR=4;AF=0.000150105;AC=1	.	.	.	0.000150105	.	.	.
1	42248756	ALU	TSD=null;ASSESS=4;INTERNAL=NM_001198850,INTRONIC;SVTYPE=ALU;SVLEN=279;MEINFO=AluY,1,280,+;DIFF=0.89:g11a,c48t,t93c,c98t,c204t,c206a,g207t,c236t,c276t;LP=73;RP=63;RA=0.213;PRIOR=false;SR=9;AF=0.00520833;AC=6	.	.	.	0.00195137	.	0.00520833	.
1	42251710	LINE1	TSD=dTTTTTT;ASSESS=5;INTERNAL=NM_001198850,INTRONIC;SVTYPE=LINE1;SVLEN=3126;MEINFO=L1Ambig,2892,6018,-;DIFF=0.03:n1-2891,t2902c,n2955,n3036,n3042-3281,t3327a,c3334g,n3338,c3354a,t3355g,n3429-3443,g3453c,t3534c,g3549a,c3563a,n3654-3662,n3669,n3675-3676,n3696,n3710-3711,g3719a,c3742t,g3754a,a3798g,c3821t,n3889-4049,t4057c,c4095t,c4098t,t4124c,c4125t,n4168-4169,c4195t,n4201-6019;LP=31;RP=18;RA=0.784…	0.00579073	.	.	.	.	.	.
1	42251736	LINE1	TSD=TTTTTTTTTTTTTTTTTTTT;ASSESS=5;INTERNAL=NM_001198850,INTRONIC;SVTYPE=LINE1;SVLEN=3141;MEINFO=L1Ambig,2877,6018,-;DIFF=0.04:n1-3560,n3575,n3590,n3618,c3718t,g3719t,c3725a,c3739t,g3741t,t3744c,g3754a,a3759t,t3804c,g3805a,c3817a,a3819c,a3831g,n3848-3901,c3954t,g3984a,g4014a,c4026t,n4049-6019;LP=12;RP=14;RA=-0.222;ISTP=0;PRIOR=false;SR=14;AF=0.010745;AC=15;GENE=FOXJ3	.	0.010745	.	.	.	.	.
1	42262409	ALU	TSD=CAAAGCTTTTTT;ASSESS=5;INTERNAL=NM_001198850,INTRONIC;SVTYPE=ALU;SVLEN=273;MEINFO=AluY,8,281,-;DIFF=1:g9a,c57t,i65gt,c98t,c150t,g211t,c236t;LP=43;RP=63;RA=-0.551;PRIOR=false;SR=13;AF=0.000199681;AC=1	0.000199681	.	.	.	.	.	.
1	42265963	ALU	TSD=CTGTACCCCAATTCTT;ASSESS=5;INTERNAL=NM_001198850,INTRONIC;SVTYPE=ALU;SVLEN=279;MEINFO=AluYb8,2,281,-;DIFF=1:c57t,c64t,c98a,t144c,g211a,c236t,c248g,i252gcagtcc,g253a,a252g;LP=13;RP=9;RA=0.531;PRIOR=false;SR=8;AF=0.000199681;AC=1	0.000199681	.	.	.	.	.	.
1	42302959	ALU	TSD=TCAATTTT;ASSESS=5;INTERNAL=NM_001198850,INTRONIC;SVTYPE=ALU;SVLEN=279;MEINFO=AluYb6_2,2,281,-;DIFF=1:c57t,c64t,c98a,t144c,g211a,c236t,c238t,c248g,i252gcagtcc,a252t,g253a,c255g;LP=235;RP=179;RA=0.393;PRIOR=false;SR=255;AF=0.0100287;AC=14;GENE=FOXJ3	0.0109824	0.0100287	.	0.0231162	.	0.00434028	.
1	42308992	LINE1	TSD=dTCGTTTTAC;ASSESS=5;INTERNAL=NM_001198850,INTRONIC;SVTYPE=LINE1;SVLEN=6019;MEINFO=L1Ta1d,0,6019,+;DIFF=0.09:g38c,n426-6019;LP=23;RP=5;RA=2.202;ISTP=0;PRIOR=false;SR=20;AF=0.125358;AC=175;GENE=FOXJ3	0.219449	0.125358	.	.	.	.	.
1	42321535	ALU	TSD=AGAAAGGTAGGAAACA;ASSESS=5;INTERNAL=FOXJ3,INTRONIC;SVTYPE=ALU;SVLEN=264;MEINFO=AluYc1,17,281,+;DIFF=0.94:g148a,c206t;LP=9;RP=9;RA=0;PRIOR=false;SR=20;AF=0.000150105;AC=1	.	.	.	0.000150105	.	.	.
1	42385800	ALU	TSD=null;ASSESS=4;INTERNAL=NM_173642,INTRONIC;SVTYPE=ALU;SVLEN=279;MEINFO=AluY,1,280,+;DIFF=0.99:g5a,g49a,c98t,c138t,g151a,g152c,g196c,g199t,g214a,c230t,g261a,c268t,g269a,c276t;LP=52;RP=93;RA=-0.839;PRIOR=false;SR=5;AF=0.00173611;AC=2	.	.	.	.	.	0.00173611	.
1	42439695	ALU	TSD=null;ASSESS=3;INTERNAL=ZMYND12,INTRONIC;SVTYPE=ALU;SVLEN=279;MEINFO=AluY,1,280,-;DIFF=0.69:c8t,g9a,c10t,c20t,g49a,c53t,c57t,c78t,a85g,t93c,c98t,c142t,t144g,g152c,g153a,c154t,g175a,g199a,a202c,c260a,g269a;LP=3;RP=12;RA=-2;PRIOR=false;SR=1;AF=4.26548e-05;AC=4	.	.	.	.	.	.	4.26548e-05
1	42452998	ALU	TSD=AGAAAAAAACT;ASSESS=5;INTERNAL=NM_001146192,INTRONIC;SVTYPE=ALU;SVLEN=281;MEINFO=AluYb5,0,281,+;DIFF=0.99:c57t,c64t,c98a,t144c,g199c,c236t,c248g,c260t,a252g;LP=109;RP=111;RA=-0.026;PRIOR=false;SR=89;AF=0.00429799;AC=6;GENE=ZMYND12	0.00499201	0.00429799	.	0.0163615	.	0.00434028	.
1	42474929	LINE1	TSD=TACACAACAATTTTT;ASSESS=5;INTERNAL=PPCS,TERMINATOR;SVTYPE=LINE1;SVLEN=684;MEINFO=L1Ta,5335,6019,-;DIFF=0.08:n1-5335,c5629a,g5689a,c5690a,g5770a,n5773,c5787a,g5789a,c5790a,t5794a,t5797a,c5798a,g5811a,n5825,n5828,n5830,n5833-5834,n5836,g5840a,g5844a,g5845a,n5846,g5847a,t5852a,n5853-5853,n5857,t5858a,n5859-5859,n5861-5862,g5863a,n5864-5864,n5866,n5868,n5873,n5875-5876,n5878,n5880-5881,n5883,n5885…	.	.	.	0.000150105	.	.	.
1	42479582	ALU	TSD=null;ASSESS=4;INTERNAL=NM_001287511,TERMINATOR;SVTYPE=ALU;SVLEN=279;MEINFO=AluY,1,280,-;DIFF=0.99:c53t,c57t,a76t,t93c,c98t,g151a,c154t,g175a,g207a,c213t,c218t,c230t,c260a,g265a,g269c,c276t;LP=47;RP=39;RA=0.269;PRIOR=false;SR=7;AF=0.0078125;AC=9	0.00119808	.	.	.	.	0.0078125	.
1	42482568	ALU	TSD=null;ASSESS=3;INTERNAL=NM_001287511,TERMINATOR;SVTYPE=ALU;SVLEN=280;MEINFO=AluYf1,1,281,-;DIFF=0.99:i124acac,t124a,c126a,t173g,c213t;LP=10;RP=9;RA=0.152;PRIOR=false;SR=2;AF=0.00793651;AC=1	.	.	.	.	0.00793651	.	.
1	42482583	ALU	TSD=AATTTATTGGCTTTT;ASSESS=5;INTERNAL=NM_001287511,TERMINATOR;SVTYPE=ALU;SVLEN=279;MEINFO=AluYf1,2,281,-;DIFF=1:i124acac,t124a,c126a,t173g,c213t,c279a;LP=532;RP=461;RA=0.207;PRIOR=false;SR=546;AF=0.0243553;AC=34	0.0165735	0.0243553	.	0.0507355	.	0.00434028	.
1	42486313	ALU	TSD=CACTGCTATTCTT;ASSESS=5;INTERNAL=PPCS,TERMINATOR;SVTYPE=ALU;SVLEN=280;MEINFO=AluY,1,281,-;DIFF=1:NoDifferences;LP=8;RP=8;RA=0;PRIOR=false;SR=7;AF=0.000150105;AC=1	.	.	.	0.000150105	.	.	.
1	42506359	ALU	TSD=AAAAGTCCTATAGCT;ASSESS=5;INTERNAL=null,null;SVTYPE=ALU;SVLEN=271;MEINFO=AluYa5,10,281,+;DIFF=1:t89c,c96a,g145a,c174t,g237c;LP=21;RP=16;RA=0.392;PRIOR=false;SR=13;AF=0.000716332;AC=1	0.000399361	0.000716332	.	0.000150105	.	.	.
1	42515220	ALU	TSD=AAAAAAAAAAAAA;ASSESS=5;INTERNAL=CCDC30,PROMOTER;SVTYPE=ALU;SVLEN=279;MEINFO=AluYb,1,280,-;DIFF=0.48:c10t,g49a,c57t,i65gt,a76t,c98t,g99a,g110a;LP=6;RP=7;RA=-0.222;PRIOR=false;SR=3;AF=0.000450315;AC=3	.	.	.	0.000450315	.	.	.
1	42545188	ALU	TSD=AAAAAAAAAAAAAAAAAAAAAAAAAA;ASSESS=5;INTERNAL=NM_001080850,INTRONIC;SVTYPE=ALU;SVLEN=279;MEINFO=AluSz,1,280,-;DIFF=0.97:c57a,g58a,t65g,c80t,g81a,i129a,c153g,a163g,c197g,g219c,d281-282;LP=7;RP=17;RA=-1.28;PRIOR=false;SR=5;AF=0.038139;AC=191	0.038139	.	0.00269784	.	.	.	.
1	42546400	ALU	TSD=dTATATATATATATATATATAT;ASSESS=5;INTERNAL=CCDC30,INTRONIC;SVTYPE=ALU;SVLEN=279;MEINFO=AluY,1,280,+;DIFF=0.93:c10t,c57t,i64tg,c64t,c98a,g175a,g196t,g199t,c206t,g214a,g215a,c218g,g237a,c238t,g261a,i264a,g271a,c276t;LP=16;RP=8;RA=1;PRIOR=false;SR=25;AF=0.240468;AC=1602	.	.	0.189299	0.240468	.	.	.
1	42577316	ALU	TSD=null;ASSESS=4;INTERNAL=CCDC30,INTRONIC;SVTYPE=ALU;SVLEN=146;MEINFO=AluY,135,281,+;DIFF=0.75:g110a,c150t,c174t,c206t,c213t,c222t,g239a;LP=19;RP=5;RA=1.926;PRIOR=false;SR=2;AF=1.01638e-05;AC=1	.	.	.	.	.	.	1.01638e-05
1	42581507	SVA	TSD=null;ASSESS=3;INTERNAL=NM_001080850,EXON_8;SVTYPE=SVA;SVLEN=1240;MEINFO=SVA,75,1315,+;DIFF=0.26:n1-950,a975c,g1009t,c1019t,a1053g,g1067a,a1079g,c1129g,c1157t,g1268a,t1292c;LP=1;RP=14;RA=-3.807;PRIOR=false;SR=6;GENE=CCDC30;AF=0.000199681;AC=1	0.000199681	.	.	.	.	.	.
1	42585273	SVA	TSD=AAAAATAAATGTTTTAT;ASSESS=5;INTERNAL=NM_001080850,INTRONIC;SVTYPE=SVA;SVLEN=212;MEINFO=SVA,1104,1316,+;DIFF=0.16:n1-1104,c1129g,c1146a,c1163a,c1164t,t1267c,g1268a,g1310t;LP=8;RP=9;RA=-0.17;PRIOR=false;SR=9;GENE=CCDC30;AF=0.000199681;AC=1	0.000199681	.	.	.	.	.	.
1	42607326	ALU	TSD=AAAAAGGGTGGTTTG;ASSESS=5;INTERNAL=CCDC30,INTRONIC;SVTYPE=ALU;SVLEN=281;MEINFO=AluYc1,0,281,+;DIFF=1:c48t,g148a;LP=27;RP=34;RA=-0.333;PRIOR=false;SR=42;AF=0.000450315;AC=3	.	.	.	0.000450315	.	.	.
1	42679749	ALU	TSD=TAGGGCATGCTTTT;ASSESS=5;INTERNAL=NM_004559,PROMOTER;SVTYPE=ALU;SVLEN=280;MEINFO=AluYb,1,281,-;DIFF=1:c57t,g79a,c98a,t144c,g211a,c236t;LP=18;RP=34;RA=-0.918;PRIOR=false;SR=14;AF=0.000716332;AC=1;GENE=PPIH	.	0.000716332	.	.	.	.	.
1	42703881	ALU	TSD=AGGATATCATGGA;ASSESS=5;INTERNAL=YBX1,TERMINATOR;SVTYPE=ALU;SVLEN=281;MEINFO=AluYa4_5,0,281,+;DIFF=1:t89c,c96a,g145a,c174t,c236t;LP=33;RP=24;RA=0.459;PRIOR=false;SR=43;AF=0.000450315;AC=3	.	.	.	0.000450315	.	.	.
1	42705569	ALU	TSD=dCCT;ASSESS=5;INTERNAL=YBX1,TERMINATOR;SVTYPE=ALU;SVLEN=279;MEINFO=AluY,1,280,+;DIFF=0.94:g5a,g9a,c10t,g21a,g54a,g58a,c78t,t86g,t93c,c98t,c138t,g151a,g162a,g199a,g207a,g237a,c260t;LP=19;RP=24;RA=-0.337;PRIOR=false;SR=6;AF=0.00044964;AC=1	.	.	0.00044964	.	.	.	.
1	42714556	ALU	TSD=TTTTTTTTTTTTTTTT;ASSESS=5;INTERNAL=YBX1,TERMINATOR;SVTYPE=ALU;SVLEN=279;MEINFO=AluSz,1,280,+;DIFF=0.62:g5a,g9a,g11a,c20t,g49a,g54a,c57t,t65g,i129a,g140a,g144a,c151t,a163g,c175t,c197g,c199t,t200g,c276t,g278a;LP=27;RP=22;RA=0.295;PRIOR=false;SR=13;AF=0.00134892;AC=3	.	.	0.00134892	.	.	.	.
1	42715114	ALU	TSD=CTCACTGAGTGTCTTT;ASSESS=5;INTERNAL=null,null;SVTYPE=ALU;SVLEN=279;MEINFO=AluYb6_2,2,281,-;DIFF=1:c8t,c57t,c64t,c98a,t144c,g211a,c236t,a252g;LP=245;RP=233;RA=0.072;PRIOR=false;SR=246;AF=0.0136103;AC=19	0.0123802	0.0136103	.	0.0364755	.	.	.
1	42716675	ALU	TSD=AAGAAGGGGTTTTT;ASSESS=5;INTERNAL=null,null;SVTYPE=ALU;SVLEN=280;MEINFO=AluYc1,1,281,-;DIFF=1:i119aa,g148a,a191g;LP=17;RP=13;RA=0.387;PRIOR=false;SR=14;AF=0.000716332;AC=1	.	0.000716332	.	.	.	.	.
1	42721642	ALU	TSD=CTAGATAAAGACTTTAT;ASSESS=5;INTERNAL=null,null;SVTYPE=ALU;SVLEN=279;MEINFO=AluY,1,280,+;DIFF=0.9:g11a,c20t,i65gt,t93c,c98t,c174t,c236t;LP=90;RP=81;RA=0.152;PRIOR=false;SR=25;AF=0.000399361;AC=2	0.000399361	.	.	0.000900901	.	.	.
1	42764712	ALU	TSD=GAAAACTTATTTTCTT;ASSESS=5;INTERNAL=P3H1,INTRONIC;SVTYPE=ALU;SVLEN=280;MEINFO=AluYe,1,281,-;DIFF=1:t144a,g207a,a210g,t219c,c236t,d265;LP=23;RP=20;RA=0.202;PRIOR=false;SR=17;AF=0.00030021;AC=2	.	.	.	0.00030021	.	.	.
1	42817611	ALU	TSD=GGCTCAATTTCTT;ASSESS=5;INTERNAL=NM_001017922,INTRONIC;SVTYPE=ALU;SVLEN=281;MEINFO=AluYa4_5,0,281,-;DIFF=1:t89c,c96a,g145a,c174t,c236t;LP=147;RP=118;RA=0.317;PRIOR=false;SR=181;AF=0.00644699;AC=9;GENE=ERMAP	0.00798722	0.00644699	.	0.0246172	.	0.00260417	.
1	42820157	ALU	TSD=CATGTGGCTACTCTT;ASSESS=5;INTERNAL=NM_001017922,INTRONIC;SVTYPE=ALU;SVLEN=279;MEINFO=AluYa5,2,281,-;DIFF=1:t89c,c96a,g145a,c174t,g237c;LP=13;RP=16;RA=-0.3;PRIOR=false;SR=19;AF=0.000716332;AC=1;GENE=ERMAP	0.000798722	0.000716332	.	.	.	.	.
1	42848353	ALU	TSD=GAGCACCCAGCTTT;ASSESS=5;INTERNAL=NM_001242739,INTRONIC;SVTYPE=ALU;SVLEN=280;MEINFO=AluYb7_4,1,281,-;DIFF=1:a28g,c57t,c64t,c98a,i119a,t144c,g199t,c236t,g237c,i252gcagtcc,c248g,a252g;LP=14;RP=45;RA=-1.684;PRIOR=false;SR=32;AF=0.00347222;AC=4	0.00219649	.	.	.	.	0.00347222	.
1	42922020	ALU	TSD=AAAAAAAAAAAAAAAAAAAAA;ASSESS=5;INTERNAL=NM_006516,TERMINATOR;SVTYPE=ALU;SVLEN=279;MEINFO=AluY,1,280,-;DIFF=0.99:g11a,a76t,t86g,t93c,c98t,g199a,g214a,c260t,g269a,c273g,c276t;LP=35;RP=39;RA=-0.156;PRIOR=false;SR=28;AF=0.0164931;AC=19	.	.	.	.	.	0.0164931	.
1	42968271	ALU	TSD=AAGATTACAGTTC;ASSESS=5;INTERNAL=SLC2A1-AS1,INTRONIC;SVTYPE=ALU;SVLEN=281;MEINFO=AluYa4_3,0,281,+;DIFF=1:t89c,c96a,c174t,g199t,g237c,i127a;LP=19;RP=25;RA=-0.396;PRIOR=false;SR=13;AF=0.000150105;AC=1	.	.	.	0.000150105	.	.	.
1	42986736	ALU	TSD=AAAATAAAATAAAATAAAATAAAATAAAATA;ASSESS=5;INTERNAL=NR_033967,TERMINATOR;SVTYPE=ALU;SVLEN=270;MEINFO=AluY,10,280,+;DIFF=0.86:t17c,g54a,c57t,c98t,c108t,c138t,g139a,c150t,c154t,g162a,g175t,c187t,g196c,g199t,a203g,g207a,g214a,c218g,t219a,c230t,g233c,c238t,c251t,c279t;LP=81;RP=87;RA=-0.103;PRIOR=false;SR=118;AF=0.00173611;AC=2	0.000199681	.	.	.	.	0.00173611	.
1	42989675	ALU	TSD=null;ASSESS=3;INTERNAL=SLC2A1-AS1,TERMINATOR;SVTYPE=ALU;SVLEN=275;MEINFO=AluSg,5,280,+;DIFF=0.7:c8t,c20t,c57t,d65-66,t78a,c80t,c111t,i129a,c139t,c143t,c151t,g154a,c155t,g156a,g180a,t196a,c197a,g198a,c199a,t200a,t201a,g202a,g208a,g225a,t226a,d231-282;LP=8;RP=10;RA=-0.322;PRIOR=false;SR=2;AF=0.00105074;AC=7	.	.	.	0.00105074	.	.	.
1	42989694	ALU	TSD=TTTTTTTTTTTTTTTTTTT;ASSESS=5;INTERNAL=NR_033967,TERMINATOR;SVTYPE=ALU;SVLEN=279;MEINFO=AluSc,1,280,-;DIFF=0.91:g5a,g9a,g11a,c20t,g54a,c57t,d65-66,t78a,g88t,g112a,i129a,c139t,c153g,g156a,g208a,g238a,c269t,g278a;LP=101;RP=153;RA=-0.599;PRIOR=false;SR=56;AF=0.0173611;AC=20	.	.	.	.	.	0.0173611	.
1	42991587	ALU	TSD=AAAAAAAGAAGGGTACC;ASSESS=5;INTERNAL=SLC2A1-AS1,TERMINATOR;SVTYPE=ALU;SVLEN=281;MEINFO=AluYi,0,281,+;DIFF=0.99:c23t,g146a,c236t,g261c,c263t,c276t,i127a;LP=18;RP=16;RA=0.17;PRIOR=false;SR=13;AF=0.000150105;AC=1	.	.	.	0.000150105	.	.	.
1	43009081	SVA	TSD=null;ASSESS=3;INTERNAL=SLC2A1-AS1,TERMINATOR;SVTYPE=SVA;SVLEN=928;MEINFO=SVA,387,1315,+;DIFF=0.47:n1-386,a395g,t405c,g406c,g456a,a487c,c501a,c502a,c504g,c508t,a513g,n561,n563-566,n570,n572,n578,t580c,t582c,t597a,n621,g627a,g632a,a653g,a668g,c677t,g681a,t729g,g764c,a773g,n795-945,t970c,t985c,g1009t,a1053g,g1067a,a1079g,c1129g,c1146a,c1163a,c1164t,g1184a,t1267c,g1268a,g1310t;LP=7;RP=11;RA=-0.65…	.	.	.	0.000150105	.	.	.
1	43065910	ALU	TSD=CCCCTTTCTTTTTTC;ASSESS=5;INTERNAL=null,null;SVTYPE=ALU;SVLEN=258;MEINFO=AluYb8,23,281,-;DIFF=1:c57t,c64t,c98a,t144c,c154t,g211a,c213t,i223a,c236t,i252gcagtcc,c260t,c248g,a252g;LP=9;RP=17;RA=-0.918;PRIOR=false;SR=19;AF=0.000716332;AC=1	.	0.000716332	.	.	.	.	.
1	43121618	ALU	TSD=AAAAAAAAAAAAAAAAAAAAAAAAAAA;ASSESS=5;INTERNAL=null,null;SVTYPE=ALU;SVLEN=279;MEINFO=AluY,1,280,-;DIFF=1:c57t,c64t,c142t,g143a,g151a,c174t,g199t,c268t;LP=26;RP=29;RA=-0.158;PRIOR=false;SR=8;AF=0.119628;AC=167	.	0.119628	.	0.0812068	.	0.0416667	.
1	43133894	ALU	TSD=TTCCAGTTTCTT;ASSESS=5;INTERNAL=FAM183A,PROMOTER;SVTYPE=ALU;SVLEN=280;MEINFO=AluYa5,1,281,-;DIFF=1:t89c,i94aa,c96a,c98t,g145a,c174t,g237c,i127a;LP=6;RP=12;RA=-1;PRIOR=false;SR=13;AF=0.000150105;AC=1	.	.	.	0.000150105	.	.	.
1	43154028	ALU	TSD=CTCTAACTTTTTTTT;ASSESS=5;INTERNAL=FAM183A,INTRONIC;SVTYPE=ALU;SVLEN=279;MEINFO=AluYb8,2,281,-;DIFF=1:c57t,c64t,g75t,c87t,c98a,t144c,g211a,c236t,c248g,i252gcagtcc,a252g;LP=13;RP=5;RA=1.379;PRIOR=false;SR=10;AF=0.000150105;AC=1	.	.	.	0.000150105	.	.	.
1	43220236	ALU	TSD=GGAGAAACTTATTTT;ASSESS=5;INTERNAL=NM_001195831,INTRONIC;SVTYPE=ALU;SVLEN=280;MEINFO=AluYa3_4,1,281,-;DIFF=1:g145a,c174t,g237c;LP=27;RP=33;RA=-0.29;PRIOR=false;SR=13;AF=0.000716332;AC=1;GENE=CFAP57	0.000199681	0.000716332	.	.	.	.	.
1	43236617	ALU	TSD=AAAAAAAAAAAAAAAAAAAAAAAAAAA;ASSESS=5;INTERNAL=NM_001195831,INTRONIC;SVTYPE=ALU;SVLEN=279;MEINFO=AluY,1,280,+;DIFF=0.69:c4t,c20t,g49a,c53t,c57t,i65gt,t69c,c98a,g100t,g196c,g197a,g199t,g207a,g212a,c213t,c218t,c230t,c236t,c238t,g239a;LP=40;RP=161;RA=-2.009;PRIOR=false;SR=119;AF=0.0225694;AC=26	0.0153754	.	0.00134892	0.0106575	.	0.0225694	.
1	43262620	ALU	TSD=AGAAATGCACAGAAAAC;ASSESS=5;INTERNAL=NM_144626,PROMOTER;SVTYPE=ALU;SVLEN=258;MEINFO=AluY,23,281,+;DIFF=1:g5a;LP=29;RP=48;RA=-0.727;PRIOR=false;SR=17;AF=0.000199681;AC=1	0.000199681	.	.	.	.	.	.
1	43269275	ALU	TSD=GCCAGATT;ASSESS=5;INTERNAL=NM_144626,PROMOTER;SVTYPE=ALU;SVLEN=279;MEINFO=AluYa1_2,1,280,-;DIFF=1:c53t,g162a,c174t,g199a,g237c,c268t,g277a;LP=29;RP=52;RA=-0.842;PRIOR=false;SR=5;AF=0.000199681;AC=1	0.000199681	.	.	.	.	.	.
1	43328639	ALU	TSD=null;ASSESS=3;INTERNAL=NM_005424,TERMINATOR;SVTYPE=ALU;SVLEN=279;MEINFO=AluY,1,280,+;DIFF=0.89:c98t,c109t,c142t,c150t,g155a,c174t,c198t,c206t,c213t,c236t,g239a,g261a;LP=64;RP=122;RA=-0.931;PRIOR=false;SR=23;AF=0.00173611;AC=2	0.00519169	.	.	.	.	0.00173611	.
1	43328653	ALU	TSD=CAGGATTTCTTTTT;ASSESS=5;INTERNAL=NM_005424,TERMINATOR;SVTYPE=ALU;SVLEN=278;MEINFO=AluYg6,3,281,-;DIFF=1:g52a,c87a,g143a,g152c,g153a,t173a,c229t,g271a;LP=140;RP=134;RA=0.063;PRIOR=false;SR=122;AF=0.00787966;AC=11	.	0.00787966	.	0.0126088	.	.	.
1	43355430	LINE1	TSD=null;ASSESS=4;INTERNAL=MPL,TERMINATOR;SVTYPE=LINE1;SVLEN=3270;MEINFO=L1Ambig,2748,6018,-;DIFF=0.01:n1-2747,c2781t,c2835a,g2857a,n2926,n2941,n2965,n2971,n3009-6019;LP=2;RP=1;RA=1;ISTP=0;PRIOR=false;SR=1;AF=0.00060042;AC=4	.	.	.	0.00060042	.	.	.
1	43376735	ALU	TSD=AAGAATGGTCAAGTG;ASSESS=5;INTERNAL=NM_001001653,TERMINATOR;SVTYPE=ALU;SVLEN=280;MEINFO=AluYa1_1,1,281,+;DIFF=1:g145a,g208a,c236t;LP=298;RP=344;RA=-0.207;PRIOR=false;SR=405;AF=0.0157593;AC=22	0.00638978	0.0157593	.	0.0223657	.	0.00173611	.
1	43422970	LINE1	TSD=null;ASSESS=1;INTERNAL=SZT2,INTRONIC;SVTYPE=LINE1;SVLEN=4497;MEINFO=L1Ambig,1521,6018,-;DIFF=0.07:n1-5261,g5268a,n5286,t5316a,t5325c,a5349g,n5363-5477,c5504t,c5508a,t5535g,g5536t,g5538t,n5549-5694,a5712g,c5744a,n5788-6019;LP=12;RP=9;RA=0.415;ISTP=-1;PRIOR=false;SR=0;AF=2.01519e-05;AC=2	.	.	.	.	.	.	2.01519e-05
1	43453865	LINE1	TSD=null;ASSESS=3;INTERNAL=HYI,5_UTR;SVTYPE=LINE1;SVLEN=5991;MEINFO=L1Ambig,27,6018,+;DIFF=0.06:n1-5163,a5199c,c5214t,g5268a,c5274t,t5316a,t5325c,n5366-6019;LP=15;RP=7;RA=1.1;ISTP=0;PRIOR=false;SR=5;AF=6.04412e-05;AC=6	.	.	.	.	.	.	6.04412e-05
1	43486819	ALU	TSD=dGTTTTTCT;ASSESS=5;INTERNAL=null,null;SVTYPE=ALU;SVLEN=279;MEINFO=AluY,1,280,-;DIFF=1:c10t,c98t,g151a,c154t,g162a,g196c,g199t,g214a,c260t,c276t;LP=21;RP=32;RA=-0.608;PRIOR=false;SR=13;AF=0.000868056;AC=1	.	.	.	.	.	0.000868056	.
1	43487344	ALU	TSD=TAGAATTGTTTTCTT;ASSESS=5;INTERNAL=HYI,PROMOTER;SVTYPE=ALU;SVLEN=280;MEINFO=AluYb7_3,1,281,-;DIFF=1:c57t,c98a,t144c,g207a,g211a,c236t,c243t,i252gcagtcc,g261a,c248g,a252g,i127a;LP=12;RP=10;RA=0.263;PRIOR=false;SR=13;AF=0.000150105;AC=1	.	.	.	0.000150105	.	.	.
1	43631987	ALU	TSD=TATTTTTTC;ASSESS=5;INTERNAL=NM_130440,TERMINATOR;SVTYPE=ALU;SVLEN=280;MEINFO=AluY,1,281,-;DIFF=1:c4t,g5a,g9a,g11a,c57t,t93c,c98a,g139a,g199t,c218g;LP=28;RP=20;RA=0.485;PRIOR=false;SR=15;AF=0.000716332;AC=1	0.000998403	0.000716332	.	.	.	.	.
1	43646281	SVA	TSD=ATGCACAACTTTC;ASSESS=5;INTERNAL=NM_014663,PROMOTER;SVTYPE=SVA;SVLEN=1240;MEINFO=SVA,75,1315,-;DIFF=0.45:n1-853,t862c,g880c,g927c,a931g,a934g,g938a,c945a,t970c,t985c,g1009t,n1020,a1053g,g1067a,a1079g,c1129g,c1146a,c1163a,c1164t,t1267c,g1268a,g1310t;LP=22;RP=14;RA=0.652;PRIOR=false;SR=13;AF=0.000716332;AC=1	0.000998403	0.000716332	.	.	.	.	.
1	43647351	ALU	TSD=0tsd;ASSESS=5;INTERNAL=KDM4A,PROMOTER;SVTYPE=ALU;SVLEN=275;MEINFO=AluY,5,280,+;DIFF=0.97:g11a,a76t,g79a,c98t,g196c,g199t,g207a,c218g,g237a,c238t,g261a,c276t;LP=11;RP=26;RA=-1.241;PRIOR=false;SR=22;AF=0.033723;AC=75	.	.	0.033723	.	.	.	.
1	43664618	ALU	TSD=TCCTTTCTTCTTTC;ASSESS=5;INTERNAL=KDM4A,INTRONIC;SVTYPE=ALU;SVLEN=281;MEINFO=AluYa4_2,0,281,-;DIFF=1:t89c,c96a,i127aaaaaa,c138t,g145a,g237c;LP=18;RP=11;RA=0.71;PRIOR=false;SR=24;AF=0.00030021;AC=2	.	.	.	0.00030021	.	.	.
1	43700302	LINE1	TSD=CGCCCAGCTAATTTTTT;ASSESS=2;INTERNAL=KDM4A-AS1,3_UTR;SVTYPE=LINE1;SVLEN=150;MEINFO=L1Ambig,5868,6018,+;DIFF=0.02:n1-5868,g5871a,n5872,t5877g,c5878t,g5880t,g5903a,g5923a,a5929g,c5930a,a5931g,g5935a,g5946a,n5955,a5989t,g6014a;LP=5;RP=9;RA=-0.848;ISTP=-1;PRIOR=false;SR=0;AF=0.000150105;AC=1	.	.	.	0.000150105	.	.	.
1	43743253	ALU	TSD=AAAACAGAGCCCCC;ASSESS=5;INTERNAL=NM_174963,INTRONIC;SVTYPE=ALU;SVLEN=274;MEINFO=AluYa4_3,7,281,+;DIFF=0.98:a63g,t89c,c96a,i119a,a125g,a161g,c174t,g237c;LP=3302;RP=3600;RA=-0.125;PRIOR=false;SR=4040;AF=0.165473;AC=231;GENE=ST3GAL3	0.161142	0.165473	0.284173	0.127139	0.246032	0.241319	.
1	43780675	SVA	TSD=null;ASSESS=4;INTERNAL=NM_174963,INTRONIC;SVTYPE=SVA;SVLEN=1240;MEINFO=SVA,75,1315,+;DIFF=0.34:n1-959,t970c,t985c,g1009t,a1053g,g1067a,a1079g,c1129g,c1146a,c1163a,c1164t,t1267c,g1268a,g1310t;LP=350;RP=246;RA=0.509;PRIOR=false;SR=150;AF=0.0164756;AC=23;GENE=ST3GAL3	0.0161741	0.0164756	0.0418165	0.00675473	0.0396825	.	.
1	43818808	ALU	TSD=AAAAAATACAATGATC;ASSESS=5;INTERNAL=NM_174963,INTRONIC;SVTYPE=ALU;SVLEN=280;MEINFO=AluYe,1,281,+;DIFF=0.99:c64t,t144a,i207ga,a210g,t219c,c236t,d264;LP=126;RP=114;RA=0.144;PRIOR=false;SR=119;AF=0.00573066;AC=8;GENE=ST3GAL3	0.00239617	0.00573066	0.0319245	0.00360252	0.0238095	0.0104167	.
1	43887835	ALU	TSD=AGAAATTCCACATCC;ASSESS=5;INTERNAL=NM_174963,INTRONIC;SVTYPE=ALU;SVLEN=281;MEINFO=AluYa5,0,281,+;DIFF=1:t89c,c96a,g145a,c174t,g237c,i127a;LP=414;RP=395;RA=0.068;PRIOR=false;SR=419;AF=0.019341;AC=27;GENE=ST3GAL3	0.0125799	0.019341	.	0.0492345	.	0.00954861	.
1	43897102	ALU	TSD=TTTTTTTTTTTTTT;ASSESS=5;INTERNAL=NM_174963,INTRONIC;SVTYPE=ALU;SVLEN=279;MEINFO=AluY,1,280,+;DIFF=0.97:g7a,c8t,c10t,g11a,c20t,g21a,a76t,t93c,g99a,c109t,g110a,g261a,g269a;LP=10;RP=31;RA=-1.632;PRIOR=false;SR=15;AF=0.000868056;AC=1	.	.	.	.	.	0.000868056	.
1	44090337	ALU	TSD=AAAAAAAAAAAAAAAAAAAAAAAAAAAAAAA;ASSESS=5;INTERNAL=KLF17,PROMOTER;SVTYPE=ALU;SVLEN=279;MEINFO=AluY,1,280,+;DIFF=0.47:g5a,g58a,a76t,t86g,t93c,c138t,t160c,g199a,c206t,c213t,c230t,c236g;LP=3;RP=6;RA=-1;PRIOR=false;SR=10;AF=0.206695;AC=1377	.	.	0.0283273	0.206695	.	.	.
1	44095820	ALU	TSD=TTTTTTTTT;ASSESS=5;INTERNAL=null,null;SVTYPE=ALU;SVLEN=212;MEINFO=AluY,69,281,+;DIFF=0.98:g9a,c10t,c53t,c57t,c98t,c107t,g110a,g143a,c150t,g196t,g199t,c206t,c213t,g214a,g261a,g271a,g277a,d281,i127a;LP=120;RP=103;RA=0.22;PRIOR=false;SR=33;AF=0.00607639;AC=7	.	.	.	.	.	0.00607639	.
1	44099920	ALU	TSD=AAGAAAGAAAGAAAGAAAGAAA;ASSESS=5;INTERNAL=null,null;SVTYPE=ALU;SVLEN=279;MEINFO=AluYa1_2,1,280,-;DIFF=1:g11a,i65gt,a76t,t86g,t93c,c98t,c174t,g237c;LP=17;RP=25;RA=-0.556;PRIOR=false;SR=33;AF=0.0265043;AC=37;GENE=KLF17	0.033746	0.0265043	.	.	.	.	.
1	44111463	ALU	TSD=null;ASSESS=3;INTERNAL=KLF17,PROMOTER;SVTYPE=ALU;SVLEN=279;MEINFO=AluY,1,280,+;DIFF=0.85:c10t,c138t,g155a,g175c,g186a,g196t,g199t,g207a,g211a,g214a,c230t,g231a,c236t,g261a,g269t,g271a,g277a,d281;LP=2;RP=9;RA=-2.17;PRIOR=false;SR=3;AF=0.0678475;AC=452	.	.	.	0.0678475	.	.	.
1	44111482	ALU	TSD=null;ASSESS=4;INTERNAL=NM_173484,PROMOTER;SVTYPE=ALU;SVLEN=279;MEINFO=AluY,1,280,+;DIFF=0.96:c98t,g162a,c174t,g186a,g214a,g237c,c254a,g257a,c260t,c268t;LP=24;RP=38;RA=-0.663;PRIOR=false;SR=11;AF=0.000716332;AC=1;GENE=KLF17	.	0.000716332	.	.	.	0.19184	.
1	44127856	ALU	TSD=null;ASSESS=3;INTERNAL=NM_173484,INTRONIC;SVTYPE=ALU;SVLEN=279;MEINFO=AluSc,1,280,-;DIFF=0.83:c48t,g54a,c57t,d65-66,t78a,g88t,c95t,i129a,c139t,c153t,c155t,c175t,c182t,g208a,c214t,g215a,c231t,g232a,d237-282;LP=90;RP=72;RA=0.322;PRIOR=false;SR=8;AF=0.0190972;AC=22	.	.	.	.	.	0.0190972	.
1	44162003	ALU	TSD=null;ASSESS=4;INTERNAL=null,null;SVTYPE=ALU;SVLEN=270;MEINFO=AluSc,10,280,+;DIFF=0.94:g21a,c22a,c53t,c57t,g58a,d65-66,t78a,g88t,c95t,i129a,g208a,c231t,c239t,g262a,g270a,c277a,d282;LP=56;RP=78;RA=-0.478;PRIOR=false;SR=7;AF=0.00954861;AC=11	.	.	.	.	.	0.00954861	.
1	44189842	ALU	TSD=AAAGAATTCTCTGTG;ASSESS=5;INTERNAL=DMAP1,PROMOTER;SVTYPE=ALU;SVLEN=280;MEINFO=AluYb8,1,281,+;DIFF=1:c57t,c64t,c92t,c98a,t144c,g211a,c236t,i252gcagtcc,c248g,a252g;LP=63;RP=85;RA=-0.432;PRIOR=false;SR=89;AF=0.00090063;AC=6	.	.	.	0.00090063	.	.	.
1	44207334	ALU	TSD=null;ASSESS=3;INTERNAL=NM_019100,PROMOTER;SVTYPE=ALU;SVLEN=279;MEINFO=AluY,1,280,-;DIFF=1:c53t,c57t,t93c,c98t,c174t,g214a,c238t,g269a,c276t;LP=17;RP=9;RA=0.918;PRIOR=false;SR=9;AF=0.0121528;AC=14	.	.	.	.	.	0.0121528	.
1	44227995	SVA	TSD=null;ASSESS=3;INTERNAL=ERI3-IT1,INTRONIC;SVTYPE=SVA;SVLEN=1267;MEINFO=SVA,48,1315,+;DIFF=0.16:n1-960,t970c,t985c,g1009t,a1053g,g1067a,a1079g,c1129g,c1146a,c1163a,c1164t,t1267c,g1268a,n1281-1316;LP=5;RP=6;RA=-0.263;PRIOR=false;SR=1;AF=0.000150105;AC=1	.	.	.	0.000150105	.	.	.
1	44270801	LINE1	TSD=CTT;ASSESS=5;INTERNAL=NM_024066,INTRONIC;SVTYPE=LINE1;SVLEN=564;MEINFO=L1Ta,5455,6019,-;DIFF=0.09:n1-5451,a5678t,t5693a;LP=127;RP=149;RA=-0.23;ISTP=0;PRIOR=false;SR=117;AF=0.00644699;AC=9;GENE=ERI3	0.00539137	0.00644699	.	0.00165116	0.00793651	0.0164931	.
1	44332262	ALU	TSD=GGCCCTATTCTTT;ASSESS=5;INTERNAL=NM_024066,INTRONIC;SVTYPE=ALU;SVLEN=280;MEINFO=AluYa5,1,281,-;DIFF=1:t89c,c96a,c108t,g145a,c174t,g237c;LP=9;RP=11;RA=-0.29;PRIOR=false;SR=12;AF=0.000199681;AC=1	0.000199681	.	.	.	.	.	.
1	44345848	ALU	TSD=AGAAAGAGAAAAGGACTG;ASSESS=5;INTERNAL=ERI3,INTRONIC;SVTYPE=ALU;SVLEN=280;MEINFO=AluYa5,1,281,+;DIFF=1:t89c,c96a,g145a,c174t,g237c;LP=13;RP=10;RA=0.379;PRIOR=false;SR=11;AF=0.000150105;AC=1	.	.	.	0.000150105	.	.	.
1	44358018	ALU	TSD=null;ASSESS=3;INTERNAL=null,null;SVTYPE=ALU;SVLEN=202;MEINFO=AluSz,79,281,+;DIFF=1:g5a,g11a,c57t,t65g,g88t,i129a,g140a,c153g,a163g,c214t,g215a,g219c,c277t;LP=52;RP=93;RA=-0.839;PRIOR=false;SR=27;AF=0.00347222;AC=4	.	.	.	.	.	0.00347222	.
[truncated: 102,947 more rows]

## Sheet: B
B. Merged list of MEIs from existing MELT call sets.
[truncated: 160,578 more rows]

[truncated: 1 more sheets: C]
