# Supplementary material for: Mutagenesis of human genomes by endogenous mobile elements on a population scale
Source: HighWire-hosted journal article supplement (doi:10.1101/gr.275323.121), 2021-11-12
Supplement: Supplemental_Table_S2.xlsx [file Supplemental_Table_S2.xlsx]

## Sheet: A
Supplemental_Table_S2.xlxs FL-L1Hs elements discovered in this study and population counts.
A. FL-L1Hs elements from merged set of 104,350 MEIs (Figure 2A).
CHR	POS	INFO	1kGP2504_AF	1kGP698_AF	Amish_AF	JHS_AF	GTEx100bp_AF	GTEx150bp_AF	UKBB50k_AF
1	11076179	TSD=AAAAAACCAAACCA;ASSESS=5;INTERNAL=NM_001001998,INTRONIC;SVTYPE=LINE1;SVLEN=6018;MEINFO=L1Ta1d,1,6019,+;DIFF=0.06:n1,t231c,t254a,n349-6019;LP=8;RP=3;RA=1.415;ISTP=0;PRIOR=false;SR=4;GENE=EXOSC10;AF=0.000199681;AC=1	0.000199681	.	.	.	.	.	.
1	12526624	TSD=TAAAATTGTC;ASSESS=5;INTERNAL=null,null;SVTYPE=LINE1;SVLEN=6019;MEINFO=L1Ta1d,0,6019,+;DIFF=0.06:n1-2,g67t,t231c,t254a,g328a,a373g,n433,n438,n468,g483a,n490-6019;LP=20;RP=1;RA=4.322;ISTP=0;PRIOR=false;SR=8	.	0.000716332	.	.	.	.	.
1	17974719	TSD=GAAAAATGAATGA;ASSESS=5;INTERNAL=null,null;SVTYPE=LINE1;SVLEN=6019;MEINFO=L1Ta1d,0,6019,+;DIFF=0.14:n492-6019;LP=13;RP=10;RA=0.379;ISTP=0;PRIOR=false;SR=16;AF=0.000199681;AC=1	0.000199681	.	.	.	.	.	.
1	19671824	TSD=GGAAATGGGCTTTTA;ASSESS=5;INTERNAL=NM_000871,INTRONIC;SVTYPE=LINE1;SVLEN=6017;MEINFO=L1Ta,2,6019,-;DIFF=0.11:n1-5542,n5846;LP=16;RP=25;RA=-0.644;ISTP=0;PRIOR=false;SR=22;GENE=HTR6;AF=0.000199681;AC=1	0.000199681	.	.	.	.	.	.
1	21714926	TSD=null;ASSESS=3;INTERNAL=NM_032236,INTRONIC;SVTYPE=LINE1;SVLEN=6011;MEINFO=L1Ta,7,6018,+;DIFF=0.12:n1-5563,n5867-5869,n5873;LP=47;RP=22;RA=1.095;ISTP=0;PRIOR=false;SR=21	.	0.00143266	.	.	.	.	.
1	21714946	TSD=TAAAAATTAGCTGGGTGTGA;ASSESS=5;INTERNAL=NM_032236,INTRONIC;SVTYPE=LINE1;SVLEN=6011;MEINFO=L1Ambig,7,6018,+;DIFF=0.11:n1-6,g67t,i72g,c72g,t78c,g165t,g213c,t231c,t254a,g352a,t376g,n391,n450,n472,n504-6019;LP=69;RP=37;RA=0.899;ISTP=0;PRIOR=false;SR=25;GENE=USP48;AF=0.000599042;AC=3	0.000599042	.	.	0.002852	.	.	.
1	21855098	TSD=null;ASSESS=1;INTERNAL=HSPG2,INTRONIC;SVTYPE=LINE1;SVLEN=6014;MEINFO=L1Ambig,4,6018,-;DIFF=0.07:n1-5040,c5093a,c5109t,n5114-5119,g5132a,t5154a,a5182g,c5193a,g5208a,n5261-5367,c5391t,n5426-5511,g5522t,c5529a,t5535g,g5538c,n5551,n5588-6019;LP=16;RP=9;RA=0.83;ISTP=-1;PRIOR=false;SR=0	.	.	.	.	.	.	1.0092e-05
1	22822414	TSD=AGAAAAGAAAACAAAAG;ASSESS=5;INTERNAL=NM_001309192,INTRONIC;SVTYPE=LINE1;SVLEN=6013;MEINFO=L1Ambig,6,6019,+;DIFF=0.12:n1-6,i73g,t231c,c251t,t254a,c327t,g352a,n489-6019;LP=19;RP=15;RA=0.341;ISTP=0;PRIOR=false;SR=16;GENE=EPHB2;AF=0.000199681;AC=1	0.000199681	.	.	0.000150105	.	.	.
1	22830736	TSD=CTCATTTTGTATTTTT;ASSESS=5;INTERNAL=NM_001309192,INTRONIC;SVTYPE=LINE1;SVLEN=6019;MEINFO=L1Ta1d,0,6019,-;DIFF=0.12:c377t,n494-6019;LP=28;RP=31;RA=-0.147;ISTP=0;PRIOR=false;SR=28	0.00139776	0.00143266	.	0.00240168	0.00793651	0.0112847	.
1	29712567	TSD=AAGAAACCTTT;ASSESS=5;INTERNAL=LINC01648,TERMINATOR;SVTYPE=LINE1;SVLEN=6016;MEINFO=L1Ambig,3,6019,-;DIFF=0.07:n1-3,i73g,c115a,c143t,g167a,t231c,t254a,c257t,n307-429,n581-6019;LP=9;RP=16;RA=-0.83;ISTP=0;PRIOR=false;SR=17;AF=0.000150105;AC=1	.	.	.	0.000150105	.	.	.
1	29904223	TSD=TTTTTTTTT;ASSESS=5;INTERNAL=null,null;SVTYPE=LINE1;SVLEN=6017;MEINFO=L1Ta1d,1,6018,+;DIFF=0.11:g210c,t231c,t254a,a388g,n447-6019;LP=121;RP=221;RA=-0.869;ISTP=0;PRIOR=false;SR=159	0.0061901	0.0100287	.	0.0249174	.	0.00173611	.
1	31538750	TSD=TATTTCATTTTTTT;ASSESS=5;INTERNAL=null,null;SVTYPE=LINE1;SVLEN=6018;MEINFO=L1Ta1d,1,6019,-;DIFF=0.06:n1,t231c,t254a,n317-6019;LP=3;RP=28;RA=-3.222;ISTP=0;PRIOR=false;SR=23	0.00159744	.	.	0.00240168	0.015873	0.00347222	.
1	33128704	TSD=CATTTTTGTAATTTT;ASSESS=5;INTERNAL=NM_001301825,TERMINATOR;SVTYPE=LINE1;SVLEN=6018;MEINFO=L1Ta1d,1,6019,-;DIFF=0.13:n1,t231c,t254a,c324a,n491-6019;LP=16;RP=16;RA=0;ISTP=0;PRIOR=false;SR=15;GENE=AZIN2;AF=0.000199681;AC=1	0.000199681	.	.	.	.	.	.
1	34040546	TSD=null;ASSESS=3;INTERNAL=NM_052896,INTRONIC;SVTYPE=LINE1;SVLEN=6016;MEINFO=L1Ta1d,3,6019,-;DIFF=0.05:n1-2,t231c,t254a,n349-6019;LP=1;RP=19;RA=-4.248;ISTP=-1;PRIOR=false;SR=11	.	.	.	.	.	0.000868056	.
1	34040560	TSD=GCATGTGTATTTCT;ASSESS=5;INTERNAL=CSMD2,INTRONIC;SVTYPE=LINE1;SVLEN=6016;MEINFO=L1Ta1d,3,6019,-;DIFF=0.04:n1-2,t231c,t254a,n292-548,n551,n573,n582,n588,n593,n598,n645,n675-678,n686,n701-1015,t1023c,n1038-1040,n1170-6019;LP=1;RP=9;RA=-3.17;ISTP=0;PRIOR=false;SR=5;GENE=CSMD2	.	.	0.00044964	.	.	.	.
1	34544889	TSD=null;ASSESS=4;INTERNAL=null,null;SVTYPE=LINE1;SVLEN=6017;MEINFO=L1Ambig,1,6018,-;DIFF=0.08:n1-5566,c5590t,a5712g,c5752g,a5865c,g5868t,c5878t,g5881t,g5903t,c5914a,n5919,n5923,n5928,n5930,n5933,n5935-5938,n5940-5944,n5946,g6014a;LP=8;RP=14;RA=-0.807;ISTP=0;PRIOR=false;SR=6	0.000199681	0.000716332	.	.	.	.	.
1	34583002	TSD=AAAAAAAAAA;ASSESS=5;INTERNAL=null,null;SVTYPE=LINE1;SVLEN=6019;MEINFO=L1Ta1d,0,6019,+;DIFF=0.12:n1-3,t82g,g167a,t231c,t254a,t290g,n539,n553-6019;LP=180;RP=148;RA=0.282;ISTP=0;PRIOR=false;SR=97;GENE=LOC105378641;AF=0.0399361;AC=200	0.0399361	.	.	0.0694987	.	.	.
1	35328120	TSD=CAGTAAAAACATTCTT;ASSESS=5;INTERNAL=NM_005095,INTRONIC;SVTYPE=LINE1;SVLEN=6017;MEINFO=L1Ta,2,6019,-;DIFF=0.12:n1-5591,n5913;LP=10;RP=22;RA=-1.138;ISTP=0;PRIOR=false;SR=16	0.000199681	0.000716332	.	.	.	.	.
1	38168047	TSD=AAAAATAGAAAAAAACTAGCCAGG;ASSESS=5;INTERNAL=LINC01343,TERMINATOR;SVTYPE=LINE1;SVLEN=6016;MEINFO=L1Ambig,3,6019,+;DIFF=0.11:n1,i73g,c115a,g167a,t231c,t254a,c257t,g352a,n504-6019;LP=45;RP=28;RA=0.684;ISTP=0;PRIOR=false;SR=33;AF=0.000450315;AC=3	.	.	.	0.000450315	.	.	.
1	38261140	TSD=GAGTCACATGTCTTTCTT;ASSESS=5;INTERNAL=LINC01343,PROMOTER;SVTYPE=LINE1;SVLEN=6019;MEINFO=L1Ambig,0,6019,-;DIFF=0.07:n1-3,i73g,c115a,c143t,g167a,t231c,t254a,c257t,g352a,n372-6019;LP=10;RP=11;RA=-0.138;ISTP=0;PRIOR=false;SR=12;AF=0.000150105;AC=1	.	.	.	0.000150105	.	.	.
1	41037053	TSD=AAAAAGTGACTGATT;ASSESS=5;INTERNAL=NM_001172219,INTRONIC;SVTYPE=LINE1;SVLEN=6013;MEINFO=L1Ta1d,6,6019,+;DIFF=0.11:n1-6,c63t,t231c,g355a,g370a,t400a,n430-432,n475,n583-6019;LP=431;RP=275;RA=0.648;ISTP=0;PRIOR=false;SR=414	0.0159744	0.015043	.	0.0574902	.	0.00434028	.
1	41153114	TSD=AACATTACAATTT;ASSESS=5;INTERNAL=NM_001172219,INTRONIC;SVTYPE=LINE1;SVLEN=6019;MEINFO=L1Ta1d,0,6019,-;DIFF=0.1:t231c,t254a,n346,n375-6019;LP=11;RP=16;RA=-0.541;ISTP=0;PRIOR=false;SR=15;GENE=SCMH1;AF=0.000199681;AC=1	0.000199681	.	.	0.00030021	.	.	.
1	41198517	TSD=AAAATTTGAATTTTCA;ASSESS=5;INTERNAL=NM_001172219,INTRONIC;SVTYPE=LINE1;SVLEN=6019;MEINFO=L1Ta1d,0,6019,+;DIFF=0.09:n1-26,c166t,n373-6019;LP=13;RP=13;RA=0;ISTP=0;PRIOR=false;SR=17;GENE=SCMH1;AF=0.000199681;AC=1	0.000199681	.	.	.	.	.	.
1	41319848	TSD=CCTCCCCCTCCTCATTTTTC;ASSESS=5;INTERNAL=null,null;SVTYPE=LINE1;SVLEN=6014;MEINFO=L1Ta1d,5,6019,-;DIFF=0.08:n1-2,t231c,t254a,n398-417,n568-6019;LP=11;RP=17;RA=-0.628;ISTP=0;PRIOR=false;SR=7;AF=0.000199681;AC=1	0.000199681	.	.	.	.	.	.
1	41808474	TSD=AAGAAAGCACTTGTC;ASSESS=5;INTERNAL=HIVEP3,INTRONIC;SVTYPE=LINE1;SVLEN=6018;MEINFO=L1Ta1d,1,6019,+;DIFF=0.06:n1,n353,n364,n379,n381,n425-6019;LP=16;RP=1;RA=4;ISTP=0;PRIOR=false;SR=13;AF=0.000150105;AC=1	.	.	.	0.000150105	.	.	.
1	41935612	TSD=TAAATGTCTCTCTC;ASSESS=5;INTERNAL=NR_038261,INTRONIC;SVTYPE=LINE1;SVLEN=6019;MEINFO=L1Ta1d,0,6019,+;DIFF=0.09:g167a,t231c,t254a,n318,c324a,n340-6019;LP=78;RP=37;RA=1.076;ISTP=0;PRIOR=false;SR=62	0.00119808	0.00286533	.	0.00615431	.	.	.
1	42308992	TSD=dTCGTTTTAC;ASSESS=5;INTERNAL=NM_001198850,INTRONIC;SVTYPE=LINE1;SVLEN=6019;MEINFO=L1Ta1d,0,6019,+;DIFF=0.09:g38c,n426-6019;LP=23;RP=5;RA=2.202;ISTP=0;PRIOR=false;SR=20	0.219449	0.125358	.	.	.	.	.
1	47139428	TSD=GAGGAAGAGCTTTCTA;ASSESS=5;INTERNAL=CYP4A22,INTRONIC;SVTYPE=LINE1;SVLEN=6019;MEINFO=L1Ta1d,0,6019,-;DIFF=0.05:c205g,t231c,n232,g252t,t254a,n280-310,n462-6019;LP=4;RP=5;RA=-0.322;ISTP=0;PRIOR=false;SR=5;AF=0.000150105;AC=1	.	.	.	0.000150105	.	.	.
1	47680884	TSD=AAAGACCCCACCTCT;ASSESS=5;INTERNAL=null,null;SVTYPE=LINE1;SVLEN=6014;MEINFO=L1Ta1d,4,6018,+;DIFF=0.1:n1-3,t231c,t254a,n355-6019;LP=15;RP=15;RA=0;ISTP=0;PRIOR=false;SR=8;AF=0.000199681;AC=1	0.000199681	.	.	0.000150105	.	.	.
1	48675986	TSD=TCCAGAGGGTGTTTTTAT;ASSESS=5;INTERNAL=AGBL4,INTRONIC;SVTYPE=LINE1;SVLEN=6013;MEINFO=L1Ta1d,6,6019,-;DIFF=0.09:n1-3,t231c,t254a,n435-6019;LP=7;RP=17;RA=-1.28;ISTP=0;PRIOR=false;SR=14;AF=0.000150105;AC=1	.	.	.	0.000150105	.	.	.
1	48701493	TSD=AGAGATAGATCTCA;ASSESS=5;INTERNAL=NM_032785,INTRONIC;SVTYPE=LINE1;SVLEN=6019;MEINFO=L1Ta1d,0,6019,+;DIFF=0.12:g184c,g210c,t231c,t254a,n417-6019;LP=18;RP=16;RA=0.17;ISTP=0;PRIOR=false;SR=14	0.000199681	0.000716332	.	.	.	.	.
1	48972818	TSD=AAAAAATACATTCTAG;ASSESS=5;INTERNAL=NM_032785,INTRONIC;SVTYPE=LINE1;SVLEN=6019;MEINFO=L1Ta1d,0,6019,+;DIFF=0.12:g210c,t231c,t254a,a388g,n443-451,n460,n602-6019;LP=17;RP=13;RA=0.387;ISTP=0;PRIOR=false;SR=10	0.000199681	0.000716332	.	.	.	.	.
1	48997592	TSD=GAACTGAATCTTCTT;ASSESS=5;INTERNAL=NM_032785,INTRONIC;SVTYPE=LINE1;SVLEN=6019;MEINFO=L1Ta1d,0,6019,-;DIFF=0.12:n1-49,g53a,c90t,t231c,t254a,c324a,n439-498,c529a,n649-6019;LP=14;RP=16;RA=-0.193;ISTP=0;PRIOR=false;SR=14	0.00199681	0.000716332	.	.	.	.	.
1	49387849	TSD=GAGTTACAATATTT;ASSESS=5;INTERNAL=NR_046839,INTRONIC;SVTYPE=LINE1;SVLEN=6017;MEINFO=L1Ta1d,2,6019,-;DIFF=0.11:n1-2,t231c,t254a,n457-6019;LP=32;RP=52;RA=-0.7;ISTP=0;PRIOR=false;SR=38;GENE=AGBL4;AF=0.000599042;AC=3	0.000599042	.	.	0.00135095	.	.	.
1	50102690	TSD=AAAAATTTATACATA;ASSESS=5;INTERNAL=ELAVL4,INTRONIC;SVTYPE=LINE1;SVLEN=6016;MEINFO=L1Ambig,3,6019,+;DIFF=0.07:n1-3,i73g,c115a,c143t,g167a,t231c,t254a,c257t,n322-6019;LP=33;RP=16;RA=1.044;ISTP=0;PRIOR=false;SR=34;AF=0.00030021;AC=2	.	.	.	0.00030021	.	.	.
1	50217064	TSD=AGAAAACAACAGAGGGG;ASSESS=5;INTERNAL=null,null;SVTYPE=LINE1;SVLEN=6019;MEINFO=L1Ta1d,0,6019,+;DIFF=0.08:t231c,t254a,n455-6019;LP=520;RP=51;RA=3.35;ISTP=0;PRIOR=false;SR=289	0.0255591	0.0186246	.	.	.	0.000868056	.
1	51671218	TSD=AAAGAACTTGGTAAGACTG;ASSESS=5;INTERNAL=OSBPL9,INTRONIC;SVTYPE=LINE1;SVLEN=6019;MEINFO=L1Ta1d,0,6019,+;DIFF=0.08:n249-277,n298,n429-6019;LP=30;RP=28;RA=0.1;ISTP=0;PRIOR=false;SR=38;AF=0.00030021;AC=2	.	.	.	0.00030021	.	.	.
1	53468732	TSD=null;ASSESS=3;INTERNAL=NM_033067,TERMINATOR;SVTYPE=LINE1;SVLEN=6018;MEINFO=L1Ta1d,1,6019,-;DIFF=0.07:g210c,t231c,t254a,n347,n349,n357,n361,n369,n378-6019;LP=6;RP=11;RA=-0.874;ISTP=-1;PRIOR=false;SR=3	0.000199681	0.000716332	.	.	.	.	.
1	55161714	TSD=AGAAAACTGAACACTCA;ASSESS=5;INTERNAL=NM_015306,INTRONIC;SVTYPE=LINE1;SVLEN=6017;MEINFO=L1Ta1d,2,6019,+;DIFF=0.12:n1-2,t231c,t254a,c327t,n531-6019;LP=104;RP=62;RA=0.746;ISTP=0;PRIOR=false;SR=77;GENE=USP24;AF=0.000998403;AC=5	0.000998403	.	.	.	.	.	.
1	55198152	TSD=AAAAAAATATTAAAAATA;ASSESS=5;INTERNAL=NM_015306,INTRONIC;SVTYPE=LINE1;SVLEN=6016;MEINFO=L1Ta,3,6019,+;DIFF=0.13:n1-5474,n5625-5636,a5837c;LP=18;RP=22;RA=-0.29;ISTP=0;PRIOR=false;SR=23;GENE=USP24;AF=0.000199681;AC=1	0.000199681	.	.	0.00060042	.	.	.
1	55204741	TSD=CCATTGTATTCATTTCT;ASSESS=5;INTERNAL=NM_015306,INTRONIC;SVTYPE=LINE1;SVLEN=6019;MEINFO=L1Ta,0,6019,-;DIFF=0.11:n1-5519,c5899t;LP=15;RP=19;RA=-0.341;ISTP=0;PRIOR=false;SR=13;GENE=USP24;AF=0.000199681;AC=1	0.000199681	.	.	.	.	.	.
1	55377416	TSD=CCTCTTGAATTTTC;ASSESS=5;INTERNAL=MIR4422,TERMINATOR;SVTYPE=LINE1;SVLEN=6014;MEINFO=L1Ta1d,5,6019,-;DIFF=0.09:n1-2,t231c,t254a,n371-6019;LP=5;RP=15;RA=-1.585;ISTP=0;PRIOR=false;SR=12;AF=0.000150105;AC=1	.	.	.	0.000150105	.	.	.
1	56308739	TSD=GATGGTGATTCTT;ASSESS=5;INTERNAL=PLPP3,TERMINATOR;SVTYPE=LINE1;SVLEN=6017;MEINFO=L1Ta1d,2,6019,-;DIFF=0.09:n1,c295g,n365-6019;LP=11;RP=27;RA=-1.295;ISTP=0;PRIOR=false;SR=16;AF=0.000150105;AC=1	.	.	.	0.000150105	.	.	.
1	56780943	TSD=AAAAAATTCATTCTC;ASSESS=5;INTERNAL=NM_001004303,INTRONIC;SVTYPE=LINE1;SVLEN=6018;MEINFO=L1Ta1d,1,6019,+;DIFF=0.07:n1,t231c,t254a,n328-330,n501-6019;LP=12;RP=1;RA=3.585;ISTP=0;PRIOR=false;SR=8;GENE=C1orf168;AF=0.000199681;AC=1	0.000199681	.	.	.	.	.	.
1	56865009	TSD=AAAAAATAAACAAACA;ASSESS=5;INTERNAL=C8A,INTRONIC;SVTYPE=LINE1;SVLEN=6016;MEINFO=L1Ta1d,3,6019,+;DIFF=0.08:n1-3,t231c,t254a,c324a,n334-6019;LP=114;RP=55;RA=1.052;ISTP=0;PRIOR=false;SR=89;AF=0.00120084;AC=8	.	.	.	0.00120084	.	.	.
1	57081609	TSD=GCTTAAGACTTTTT;ASSESS=5;INTERNAL=NM_021080,INTRONIC;SVTYPE=LINE1;SVLEN=6018;MEINFO=L1Ta1d,1,6019,-;DIFF=0.09:n1,n472-6019;LP=115;RP=208;RA=-0.855;ISTP=0;PRIOR=false;SR=146	0.0103834	0.00787966	.	0.0267187	.	0.00173611	.
1	57151775	TSD=null;ASSESS=4;INTERNAL=DAB1,INTRONIC;SVTYPE=LINE1;SVLEN=6017;MEINFO=L1Ta1d,1,6018,-;DIFF=0.06:c171g,t231c,t254a,t374a,n375,n413,a423g,n470-6019;LP=5;RP=6;RA=-0.263;ISTP=0;PRIOR=false;SR=4;AF=0.00030021;AC=2	.	.	.	0.00030021	.	.	.
1	57195390	TSD=AACAATAAAGAT;ASSESS=5;INTERNAL=NM_021080,INTRONIC;SVTYPE=LINE1;SVLEN=6015;MEINFO=L1Ta1d,4,6019,+;DIFF=0.1:n1-4,c37a,t231c,g252c,t254a,g285a,c363t,n455-6019;LP=14;RP=8;RA=0.807;ISTP=0;PRIOR=false;SR=10;GENE=DAB1;AF=0.000199681;AC=1	0.000199681	.	.	.	.	.	.
1	57299227	TSD=TCTGATGGTCTAACTTTTCT;ASSESS=5;INTERNAL=NM_021080,INTRONIC;SVTYPE=LINE1;SVLEN=6017;MEINFO=L1Ta1d,2,6019,-;DIFF=0.11:n1-2,t231c,t254a,c327t,n467-6019;LP=25;RP=56;RA=-1.163;ISTP=0;PRIOR=false;SR=34	.	0.00143266	.	.	.	.	.
1	58625673	TSD=GGAAGTAGAACTCTT;ASSESS=5;INTERNAL=null,null;SVTYPE=LINE1;SVLEN=6017;MEINFO=L1Ambig,2,6019,-;DIFF=0.09:n1-22,i73g,c191t,c192t,t193c,t231c,c251t,t254a,g352a,n555-6019;LP=12;RP=25;RA=-1.059;ISTP=0;PRIOR=false;SR=21	0.000199681	0.000716332	.	.	.	.	.
1	60250042	TSD=GAGATTGGTGTATTTTT;ASSESS=5;INTERNAL=null,null;SVTYPE=LINE1;SVLEN=6019;MEINFO=L1Ambig,0,6019,-;DIFF=0.1:n1-5545,g5686a,a5712g,n5844,n5847-5848,n5853,n5863-5864,n5873,n5877,n5879,n5886,n5888,n5891-5892,n5894,n5896,t5902c,c5930a;LP=424;RP=455;RA=-0.102;ISTP=0;PRIOR=false;SR=330	0.0173722	0.0143266	.	0.00105074	0.00793651	0.00694444	.
1	60412669	TSD=GAAAGAAAAAATCTT;ASSESS=5;INTERNAL=LOC101926964,TERMINATOR;SVTYPE=LINE1;SVLEN=6017;MEINFO=L1Ta1d,2,6019,-;DIFF=0.1:n1,t231c,t254a,n474-6019;LP=5;RP=16;RA=-1.678;ISTP=0;PRIOR=false;SR=8;AF=0.000150105;AC=1	.	.	.	0.000150105	.	.	.
1	62082070	TSD=GGCAAGATTTTTCT;ASSESS=5;INTERNAL=NM_176877,INTRONIC;SVTYPE=LINE1;SVLEN=6018;MEINFO=L1Ta1d,1,6019,-;DIFF=0.1:n542-6019;LP=6;RP=20;RA=-1.737;ISTP=0;PRIOR=false;SR=10	0.000599042	0.000716332	.	0.00180126	.	.	.
1	62559468	TSD=GTTTTAGTTT;ASSESS=5;INTERNAL=DOCK7,INTRONIC;SVTYPE=LINE1;SVLEN=6017;MEINFO=L1Ta1d,2,6019,-;DIFF=0.06:n1-2,t231c,t254a,n370-6019;LP=5;RP=30;RA=-2.585;ISTP=0;PRIOR=false;SR=29;AF=0.00030021;AC=2	.	.	.	0.00030021	.	.	.
1	62805118	TSD=null;ASSESS=3;INTERNAL=ATG4C,INTRONIC;SVTYPE=LINE1;SVLEN=6017;MEINFO=L1Ta1d,2,6019,-;DIFF=0.06:n124-172,t231c,t254a,t290c,g294a,c304t,c305g,g313a,n317-6019;LP=8;RP=18;RA=-1.17;ISTP=-1;PRIOR=false;SR=14	.	.	.	.	.	.	6.04412e-05
1	62929753	TSD=null;ASSESS=4;INTERNAL=null,null;SVTYPE=LINE1;SVLEN=6018;MEINFO=L1Ta1d,1,6019,+;DIFF=0.08:n1,t231c,t254a,c269t,n532,n567-6019;LP=28;RP=1;RA=4.807;ISTP=-1;PRIOR=false;SR=10	0.000199681	0.000716332	.	.	.	.	.
1	65390025	TSD=CTCTAAAAAATTTTTT;ASSESS=5;INTERNAL=NM_001256864,INTRONIC;SVTYPE=LINE1;SVLEN=6017;MEINFO=L1Ta,2,6019,-;DIFF=0.1:n1-5316,n5359,n5453,n5467-5676;LP=132;RP=75;RA=0.816;ISTP=0;PRIOR=false;SR=150	0.0103834	0.0100287	.	0.0306214	.	0.00173611	.
1	65994805	TSD=AATATTTTTCTTT;ASSESS=5;INTERNAL=PDE4B,INTRONIC;SVTYPE=LINE1;SVLEN=6018;MEINFO=L1Ta,1,6019,-;DIFF=0.11:n1-5620,a5655g,n5691,g5879a,c5982t;LP=11;RP=14;RA=-0.348;ISTP=0;PRIOR=false;SR=10;AF=0.000150105;AC=1	.	.	.	0.000150105	.	.	.
1	66489536	TSD=AAAACTGAGTCTC;ASSESS=5;INTERNAL=null,null;SVTYPE=LINE1;SVLEN=6019;MEINFO=L1Ta1d,0,6019,+;DIFF=0.09:t231c,n421-6019;LP=130;RP=77;RA=0.756;ISTP=0;PRIOR=false;SR=100	0.00259585	0.00501433	.	0.00975683	.	0.000869565	.
1	67716842	TSD=GAATCAATTGTTCTT;ASSESS=5;INTERNAL=GNG12,INTRONIC;SVTYPE=LINE1;SVLEN=6016;MEINFO=L1Ta1d,3,6019,-;DIFF=0.1:n1-2,g38c,n351-6019;LP=15;RP=17;RA=-0.181;ISTP=0;PRIOR=false;SR=19;AF=0.000150105;AC=1	.	.	.	0.000150105	.	.	.
1	68999609	TSD=CACCTTGCGTTTTA;ASSESS=5;INTERNAL=DEPDC1-AS1,TERMINATOR;SVTYPE=LINE1;SVLEN=6007;MEINFO=L1Ta1d,12,6019,-;DIFF=0.1:n1-12,g210c,t231c,t254a,n327,n388-6019;LP=25;RP=20;RA=0.322;ISTP=0;PRIOR=false;SR=24;AF=0.00030021;AC=2	.	.	.	0.00030021	.	.	.
1	69233166	TSD=AAAAACTTATA;ASSESS=5;INTERNAL=null,null;SVTYPE=LINE1;SVLEN=6012;MEINFO=L1Ambig,7,6019,+;DIFF=0.09:n1-7,i73g,c115a,c143t,g167a,t231c,t254a,c257t,g352a,n373,n423,n504-6019;LP=14;RP=18;RA=-0.363;ISTP=0;PRIOR=false;SR=9;GENE=LOC105378786;AF=0.000199681;AC=1	0.000199681	.	.	.	.	.	.
1	69336126	TSD=AAAAAAAATCGCCTA;ASSESS=5;INTERNAL=null,null;SVTYPE=LINE1;SVLEN=6017;MEINFO=L1Ta1d,1,6018,-;DIFF=0.1:n24,t231c,t254a,n324-325,n328,n338,n342,n355,n362,n398,n402-6019;LP=114;RP=306;RA=-1.424;ISTP=0;PRIOR=false;SR=247	0.0179712	0.0186246	.	0.0622936	.	0.00434783	.
1	69395643	TSD=TTTTTTTTTTTTTTTTTTT;ASSESS=5;INTERNAL=LRRC7,PROMOTER;SVTYPE=LINE1;SVLEN=6007;MEINFO=L1Ambig,11,6018,+;DIFF=0:n1-2850,g2857a,t2902c,n3002-6019;LP=6;RP=2;RA=1.585;ISTP=0;PRIOR=false;SR=6;AF=0.198439;AC=1322	.	.	.	0.198439	.	.	.
1	69395653	TSD=TTTTTTTTTTTTTTTTTTTTTTTTTTTTTT;ASSESS=5;INTERNAL=LRRC7,PROMOTER;SVTYPE=LINE1;SVLEN=6007;MEINFO=L1Ta1d,11,6018,+;DIFF=0.01:n1-10,g38a,c54t,g61a,c63t,n77-6019;LP=29;RP=39;RA=-0.427;ISTP=0;PRIOR=false;SR=148	.	.	0.208183	.	.	.	.
1	70463655	TSD=AAGAAAAGAGGTTT;ASSESS=5;INTERNAL=null,null;SVTYPE=LINE1;SVLEN=6019;MEINFO=L1Ta,0,6019,-;DIFF=0.07:n1-5476,n5592,n5627-5633,n5675,n5685,n5707,n5714,n5724,n5737,n5742,n5744,n5754,n5759,g5766t,a5837c,c5945t;LP=8;RP=23;RA=-1.524;ISTP=0;PRIOR=false;SR=16;AF=0.000199681;AC=1	0.000199681	.	.	.	.	.	.
1	70858740	TSD=CCAGGACCTGTGTTCTTT;ASSESS=5;INTERNAL=NM_198717,INTRONIC;SVTYPE=LINE1;SVLEN=6017;MEINFO=L1Ta1d,2,6019,-;DIFF=0.08:t231c,c445t,n472-6019;LP=10;RP=32;RA=-1.678;ISTP=0;PRIOR=false;SR=26;GENE=PTGER3;AF=0.000199681;AC=1	0.000199681	.	.	.	.	.	.
1	71072413	TSD=null;ASSESS=3;INTERNAL=NM_203350,INTRONIC;SVTYPE=LINE1;SVLEN=6010;MEINFO=L1Ta1d,8,6018,+;DIFF=0.13:n1-7,c37t,g61a,t231c,t254a,g483a,n497-530,a597g,n702-6019;LP=37;RP=15;RA=1.303;ISTP=0;PRIOR=false;SR=7	.	0.00143266	.	.	0.00793651	.	.
1	71072424	TSD=AAGAATTTTTT;ASSESS=5;INTERNAL=NM_203350,INTRONIC;SVTYPE=LINE1;SVLEN=6010;MEINFO=L1Ta1d,8,6018,-;DIFF=0.07:n1-7,c37t,g61a,t231c,t254a,n392-6019;LP=119;RP=48;RA=1.31;ISTP=0;PRIOR=false;SR=24;GENE=ZRANB2;AF=0.00119808;AC=6	0.00119808	.	.	.	.	.	.
1	71072427	TSD=AAGAATTTTTTCTG;ASSESS=5;INTERNAL=ZRANB2,INTRONIC;SVTYPE=LINE1;SVLEN=6010;MEINFO=L1Ta,8,6018,+;DIFF=0.05:n1-5748,n5825-5872,c5899t;LP=151;RP=197;RA=-0.384;ISTP=0;PRIOR=false;SR=106	.	.	.	.	.	.	0.00120899
1	71093034	TSD=null;ASSESS=4;INTERNAL=NR_046217,INTRONIC;SVTYPE=LINE1;SVLEN=6014;MEINFO=L1Ta1d,4,6018,-;DIFF=0.07:n1-3,t231c,t254a,n295-321,n472-6019;LP=20;RP=1;RA=4.322;ISTP=0;PRIOR=false;SR=9;GENE=ZRANB2-AS2;AF=0.000199681;AC=1	0.000199681	.	.	.	.	.	.
1	71450984	TSD=CCATGTTTTT;ASSESS=5;INTERNAL=NM_173808,INTRONIC;SVTYPE=LINE1;SVLEN=6018;MEINFO=L1Ta1d,1,6019,-;DIFF=0.09:n1,t231c,t254a,n385-417,n568-6019;LP=6;RP=22;RA=-1.874;ISTP=0;PRIOR=false;SR=12;GENE=NEGR1;AF=0.000199681;AC=1	0.000199681	.	.	.	.	.	.
1	71925914	TSD=TGCACTGGGATTT;ASSESS=5;INTERNAL=NM_173808,INTRONIC;SVTYPE=LINE1;SVLEN=6018;MEINFO=L1Ta1d,1,6019,-;DIFF=0.12:n1-2,t231c,t254a,n467,n484,n523-6019;LP=7;RP=13;RA=-0.893;ISTP=0;PRIOR=false;SR=11;GENE=NEGR1;AF=0.000199681;AC=1	0.000199681	.	.	0.000150105	.	.	.
1	72170378	TSD=CTGTAAGTTCTTCTT;ASSESS=5;INTERNAL=NEGR1,INTRONIC;SVTYPE=LINE1;SVLEN=6017;MEINFO=L1Ta,2,6019,-;DIFF=0.08:n1-5600,n5645,n5652,t5657a,n5660-5661,n5689-5690,n5714-5715,n5719,a6006g;LP=25;RP=25;RA=0;ISTP=0;PRIOR=false;SR=40;AF=0.00030021;AC=2	.	.	.	0.00030021	.	.	.
1	72928878	TSD=GAAATATTTTC;ASSESS=5;INTERNAL=null,null;SVTYPE=LINE1;SVLEN=6015;MEINFO=L1Ta1d,3,6018,+;DIFF=0.1:n1-2,t231c,t254a,n385-6019;LP=9;RP=17;RA=-0.918;ISTP=0;PRIOR=false;SR=14;AF=0.000199681;AC=1	0.000199681	.	.	0.00030021	.	.	.
1	73127987	TSD=AAAAAAAAAGAAATGACTA;ASSESS=5;INTERNAL=LINC01360,PROMOTER;SVTYPE=LINE1;SVLEN=6018;MEINFO=L1Ta,1,6019,+;DIFF=0.11:n1-5366,c5391t,g5417a,n5518-5553,c5562t,c5570t,a5571g,g5573a,g5577a,t5580c,g5586a,a5632t,c5643t,t5649a,c5662t,a5669g,c5672t,n5699-5736,n5742-5745,n5763,n5769,g5770a,t5808a;LP=34;RP=26;RA=0.387;ISTP=0;PRIOR=false;SR=26;AF=0.00030021;AC=2	.	.	.	0.00030021	.	.	.
1	73613017	TSD=CCTGATAGTTCT;ASSESS=5;INTERNAL=null,null;SVTYPE=LINE1;SVLEN=6016;MEINFO=L1Ta1d,3,6019,-;DIFF=0.12:t231c,t254a,c327t,n423,n444-463,n615-6019;LP=34;RP=86;RA=-1.339;ISTP=0;PRIOR=false;SR=65;AF=0.000798722;AC=4	0.000798722	.	.	.	.	.	.
1	73875244	TSD=AAAAGAATATAGAG;ASSESS=5;INTERNAL=null,null;SVTYPE=LINE1;SVLEN=6019;MEINFO=L1Ta1d,0,6019,+;DIFF=0.11:n1-4,g156a,t231c,t254a,g319c,n567-6019;LP=87;RP=51;RA=0.771;ISTP=0;PRIOR=false;SR=66	0.00319489	0.00358166	.	0.00945662	.	0.00173913	.
1	76142386	TSD=CCCATTCTT;ASSESS=5;INTERNAL=NM_152996,INTRONIC;SVTYPE=LINE1;SVLEN=6015;MEINFO=L1Ta1d,4,6019,-;DIFF=0.1:n1-4,t231c,t254a,n383-429,n580-6019;LP=8;RP=20;RA=-1.322;ISTP=0;PRIOR=false;SR=12;GENE=ST6GALNAC3;AF=0.000199681;AC=1	0.000199681	.	.	.	.	.	.
1	76177688	TSD=TAAAATGCATTTAATA;ASSESS=5;INTERNAL=ST6GALNAC3,INTRONIC;SVTYPE=LINE1;SVLEN=6016;MEINFO=L1Ta1d,3,6019,+;DIFF=0.09:n1-3,t231c,t254a,n308,n333,n335,n344,n363-6019;LP=33;RP=27;RA=0.29;ISTP=0;PRIOR=false;SR=33;AF=0.000450315;AC=3	.	.	.	0.000450315	.	.	.
1	76777427	TSD=CCTATTATTCTCTT;ASSESS=5;INTERNAL=null,null;SVTYPE=LINE1;SVLEN=6018;MEINFO=L1Ta1d,1,6019,-;DIFF=0.1:c144g,t231c,t254a,n477-6019;LP=7;RP=21;RA=-1.585;ISTP=0;PRIOR=false;SR=13;AF=0.000199681;AC=1	0.000199681	.	.	.	.	.	.
1	77028426	TSD=AGAAATCAAGCTGG;ASSESS=5;INTERNAL=NM_030965,INTRONIC;SVTYPE=LINE1;SVLEN=6018;MEINFO=L1Ta1d,1,6019,+;DIFF=0.1:t231c,t254a,n560-6019;LP=171;RP=126;RA=0.441;ISTP=0;PRIOR=false;SR=140;GENE=ST6GALNAC5;AF=0.00179712;AC=9	0.00179712	.	.	0.00675473	.	.	.
1	78141433	TSD=GAAATAAACCA;ASSESS=5;INTERNAL=NM_017655,TERMINATOR;SVTYPE=LINE1;SVLEN=6016;MEINFO=L1Ambig,3,6019,+;DIFF=0.09:n1-3,i73g,c115a,c143t,g167a,t231c,t254a,c257t,g352a,n511-6019;LP=22;RP=1;RA=4.459;ISTP=0;PRIOR=false;SR=16;GENE=LOC107984997;AF=0.00179712;AC=9	0.00179712	.	.	.	.	.	.
1	78145312	TSD=GCATTTGTT;ASSESS=5;INTERNAL=NM_017655,TERMINATOR;SVTYPE=LINE1;SVLEN=6018;MEINFO=L1Ta1d,1,6019,-;DIFF=0.12:n1,t231c,t254a,n421-6019;LP=24;RP=26;RA=-0.115;ISTP=0;PRIOR=false;SR=30;AF=0.000399361;AC=2	0.000399361	.	.	.	.	.	.
1	78195985	TSD=AGGGGAGGATCTTTCTTT;ASSESS=5;INTERNAL=null,null;SVTYPE=LINE1;SVLEN=6019;MEINFO=L1Ta,0,6019,-;DIFF=0.12:n1-5601;LP=14;RP=17;RA=-0.28;ISTP=0;PRIOR=false;SR=20;AF=0.000199681;AC=1	0.000199681	.	.	.	.	.	.
1	78331356	TSD=AAATAATTTTTT;ASSESS=5;INTERNAL=NR_027310,INTRONIC;SVTYPE=LINE1;SVLEN=6019;MEINFO=L1Ta,0,6019,-;DIFF=0.08:n1-5695,t6012g;LP=11;RP=5;RA=1.138;ISTP=0;PRIOR=false;SR=7;GENE=MGC27382;AF=0.000199681;AC=1	0.000199681	.	.	.	.	.	.
1	78545811	TSD=AAAATTCCCATAGT;ASSESS=5;INTERNAL=NM_000959,TERMINATOR;SVTYPE=LINE1;SVLEN=6017;MEINFO=L1Ambig,2,6019,+;DIFF=0.09:n1-2,i73g,c115a,g167a,t231c,t254a,c257t,n352-6019;LP=15;RP=8;RA=0.907;ISTP=0;PRIOR=false;SR=15;AF=0.000199681;AC=1	0.000199681	.	.	.	.	.	.
1	78676992	TSD=GATAACAAAGTTTT;ASSESS=5;INTERNAL=null,null;SVTYPE=LINE1;SVLEN=6018;MEINFO=L1Ta1d,1,6019,-;DIFF=0.11:n1,t231c,t254a,n409,n411,n430,n446-6019;LP=14;RP=24;RA=-0.778;ISTP=0;PRIOR=false;SR=17	0.000199681	0.000716332	.	.	.	.	.
1	78805848	TSD=GAAAATTTAT;ASSESS=5;INTERNAL=ADGRL4,TERMINATOR;SVTYPE=LINE1;SVLEN=6012;MEINFO=L1Ta,7,6019,+;DIFF=0.1:n1-5612,g5864a;LP=20;RP=14;RA=0.515;ISTP=0;PRIOR=false;SR=17;AF=0.000450315;AC=3	.	.	.	0.000450315	.	.	.
1	79531640	TSD=GCAATATTTA;ASSESS=5;INTERNAL=null,null;SVTYPE=LINE1;SVLEN=6015;MEINFO=L1Ta1d,4,6019,-;DIFF=0.09:n1-3,t231c,t254a,c327t,n454-6019;LP=25;RP=51;RA=-1.029;ISTP=0;PRIOR=false;SR=37;AF=0.000599042;AC=3	0.000599042	.	.	.	.	.	.
1	79652396	TSD=AAAAAGTAATGC;ASSESS=5;INTERNAL=null,null;SVTYPE=LINE1;SVLEN=6012;MEINFO=L1Ta1d,7,6019,+;DIFF=0.09:n1-7,t231c,t254a,c327t,n503-6019;LP=25;RP=10;RA=1.322;ISTP=0;PRIOR=false;SR=6	0.000199681	0.000716332	.	.	.	.	.
1	80490309	TSD=GTTAATGTTATTTTC;ASSESS=5;INTERNAL=null,null;SVTYPE=LINE1;SVLEN=6015;MEINFO=L1Ta1d,4,6019,-;DIFF=0.13:n1-3,t82g,n505-6019;LP=18;RP=11;RA=0.71;ISTP=0;PRIOR=false;SR=13	0.000199681	0.000716332	.	.	.	.	.
1	80513857	TSD=AAGACACATCATCAT;ASSESS=5;INTERNAL=null,null;SVTYPE=LINE1;SVLEN=6016;MEINFO=L1Ambig,3,6019,+;DIFF=0.1:n1-3,g38a,i72c,g83c,t153c,g219t,t231c,t254a,g313a,n334-6019;LP=14;RP=4;RA=1.807;ISTP=0;PRIOR=false;SR=15;AF=0.000199681;AC=1	0.000199681	.	.	.	.	.	.
1	81278672	TSD=TAACAATAATTCTT;ASSESS=5;INTERNAL=null,null;SVTYPE=LINE1;SVLEN=6018;MEINFO=L1Ta1d,1,6019,-;DIFF=0.12:t231c,t254a,c324a,n495-6019;LP=24;RP=33;RA=-0.459;ISTP=0;PRIOR=false;SR=33;GENE=LOC107985018;AF=0.000399361;AC=2	0.000399361	.	.	0.00135095	.	.	.
1	81349074	TSD=GAAAAAGTTTT;ASSESS=5;INTERNAL=null,null;SVTYPE=LINE1;SVLEN=6019;MEINFO=L1Ambig,0,6019,+;DIFF=0.09:n1-5551,c5585t,a5598g,n5605,n5624,n5634,n5647,n5651,n5685,t5693c,n5702-5721,n5723,n5727,n5732,n5735-5736,n5741,n5743,n5745,n5757-5758,n5760,n5762-5764,n5768-5769,n5771-5772,a5774t,n5775,n5777,n5779,n5781,n5783,n5787,n5791-5792,n5794-5795,n5797,n5799,n5804,g5923a,a5931g;LP=9;RP=6;RA=0.585;ISTP=0;P…	0.000199681	.	.	0.000150105	.	.	.
1	81563605	TSD=AATATAACAGAATTTT;ASSESS=5;INTERNAL=LOC101927434,PROMOTER;SVTYPE=LINE1;SVLEN=6018;MEINFO=L1Ta1d,1,6019,-;DIFF=0.1:n1,g152c,t231c,t254a,n553-6019;LP=8;RP=13;RA=-0.7;ISTP=0;PRIOR=false;SR=16;AF=0.000150105;AC=1	.	.	.	0.000150105	.	.	.
1	81725582	TSD=null;ASSESS=3;INTERNAL=NM_001297704,INTRONIC;SVTYPE=LINE1;SVLEN=6017;MEINFO=L1Ta1d,2,6019,-;DIFF=0.06:n1-2,t231c,t254a,n359-6019;LP=1;RP=11;RA=-3.459;ISTP=-1;PRIOR=false;SR=8	.	.	.	.	.	0.000868056	.
1	83969423	TSD=AAGAAGAACTCACTG;ASSESS=5;INTERNAL=NM_024686,INTRONIC;SVTYPE=LINE1;SVLEN=6018;MEINFO=L1Ta1d,1,6019,+;DIFF=0.05:c37a,t231c,g252c,t254a,g285a,n324-6019;LP=9;RP=1;RA=3.17;ISTP=0;PRIOR=false;SR=6;GENE=TTLL7;AF=0.000199681;AC=1	0.000199681	.	.	.	.	.	.
1	85171224	TSD=AAGAATGATCAACTT;ASSESS=5;INTERNAL=NM_032184,INTRONIC;SVTYPE=LINE1;SVLEN=6017;MEINFO=L1Ambig,2,6019,+;DIFF=0.13:n1-5546,a5931g;LP=24;RP=23;RA=0.061;ISTP=0;PRIOR=false;SR=25;GENE=SYDE2;AF=0.000399361;AC=2	0.000399361	.	.	.	.	.	.
1	85376181	TSD=TAAAGTTTGCTTTTTA;ASSESS=5;INTERNAL=NM_001134445,INTRONIC;SVTYPE=LINE1;SVLEN=6019;MEINFO=L1Ta1d,0,6019,-;DIFF=0.1:n423-6019;LP=10;RP=16;RA=-0.678;ISTP=0;PRIOR=false;SR=16;GENE=DDAH1;AF=0.000199681;AC=1	0.000199681	.	.	.	.	.	.
1	85695667	TSD=AAGTTCAGCAAGATTCT;ASSESS=5;INTERNAL=ZNHIT6,INTRONIC;SVTYPE=LINE1;SVLEN=6019;MEINFO=L1Ta,0,6019,-;DIFF=0.09:n1-5554,n5706-5729,g5883a,g5886a;LP=16;RP=18;RA=-0.17;ISTP=0;PRIOR=false;SR=20;AF=0.000150105;AC=1	.	.	.	0.000150105	.	.	.
1	86022314	TSD=ACAGA;ASSESS=5;INTERNAL=COL24A1,INTRONIC;SVTYPE=LINE1;SVLEN=6011;MEINFO=L1Ambig,7,6018,+;DIFF=0.06:n1-2224,t2241a,n2301-2378,t2410a,n2430-2488,c2513t,a2514g,n2565-6019;LP=5;RP=8;RA=-0.678;ISTP=0;PRIOR=false;SR=13	.	.	.	.	.	.	2.01471e-05
1	86580408	TSD=AAAAAACAAAACAATG;ASSESS=5;INTERNAL=NM_012128,3_UTR;SVTYPE=LINE1;SVLEN=6018;MEINFO=L1Ambig,1,6019,+;DIFF=0.08:g4a,i73g,g142t,t231c,t254a,c282t,n319-6019;LP=22;RP=6;RA=1.874;ISTP=0;PRIOR=false;SR=8;GENE=CLCA4	.	.	.	.	0.00793651	.	.
1	86891778	TSD=AAGATCTCTATGCCT;ASSESS=5;INTERNAL=NM_203341,INTRONIC;SVTYPE=LINE1;SVLEN=6014;MEINFO=L1Ambig,4,6018,-;DIFF=0.05:n1-3,i73g,c115a,g167a,t231c,t254a,c257t,n312-6019;LP=10;RP=1;RA=3.322;ISTP=0;PRIOR=false;SR=5	0.000399361	.	.	.	.	0.000868056	.
1	87075834	TSD=GTATAATAGTT;ASSESS=5;INTERNAL=NM_012262,INTRONIC;SVTYPE=LINE1;SVLEN=6019;MEINFO=L1Ta1d,0,6019,-;DIFF=0.12:n1-2,t231c,t254a,n484-6019;LP=10;RP=19;RA=-0.926;ISTP=0;PRIOR=false;SR=12	0.000798722	0.000716332	.	0.00270189	.	.	.
1	87176402	TSD=GAGATGTCCACATTTT;ASSESS=5;INTERNAL=null,null;SVTYPE=LINE1;SVLEN=6017;MEINFO=L1Ambig,2,6019,-;DIFF=0.11:n1-5547,n5705,a5931g;LP=15;RP=15;RA=0;ISTP=0;PRIOR=false;SR=27;AF=0.000199681;AC=1	0.000199681	.	.	.	.	.	.
1	88090107	TSD=GATTTTTCATTTCTT;ASSESS=5;INTERNAL=PKN2-AS1,TERMINATOR;SVTYPE=LINE1;SVLEN=6007;MEINFO=L1Ta1d,12,6019,-;DIFF=0.1:n1-12,t231c,t254a,c324a,n356,n364,n366,n446-6019;LP=21;RP=23;RA=-0.131;ISTP=0;PRIOR=false;SR=36;AF=0.00030021;AC=2	.	.	.	0.00030021	.	.	.
1	88166274	TSD=AAGAAAATGAG;ASSESS=5;INTERNAL=null,null;SVTYPE=LINE1;SVLEN=6019;MEINFO=L1Ta,0,6019,+;DIFF=0.14:n1-4692,n4695,t4712c,c4714t,g4752c,c4853t,c4866t,t4880a,t4887c,c4893t,a4898g,n4917-5000,a5006c,n5087,a5092g,c5093a,n5099,n5151-5491,n5704,n5710-5716,g5885a,n5989;LP=16;RP=14;RA=0.193;ISTP=0;PRIOR=false;SR=18;GENE=LOC107985520;AF=0.000199681;AC=1	0.000199681	.	.	.	.	.	.
1	88297869	TSD=GAAAATGAAGCAGCTC;ASSESS=5;INTERNAL=null,null;SVTYPE=LINE1;SVLEN=6018;MEINFO=L1Ta1d,1,6019,+;DIFF=0.13:n1,t231c,t254a,n470-6019;LP=21;RP=16;RA=0.392;ISTP=0;PRIOR=false;SR=16;GENE=LOC107985520;AF=0.000199681;AC=1	0.000199681	.	.	.	.	.	.
1	88574197	TSD=AAAAGAA;ASSESS=5;INTERNAL=PKN2-AS1,INTRONIC;SVTYPE=LINE1;SVLEN=6019;MEINFO=L1Ta1d,0,6019,+;DIFF=0.1:t231c,t254a,n412-6019;LP=46;RP=23;RA=1;ISTP=0;PRIOR=false;SR=34;AF=0.000450315;AC=3	.	.	.	0.000450315	.	.	.
1	89498429	TSD=CCTGAGACATTCTTT;ASSESS=5;INTERNAL=null,null;SVTYPE=LINE1;SVLEN=6010;MEINFO=L1Ta1d,9,6019,-;DIFF=0.08:n1-5,c137t,n411-6019;LP=5;RP=13;RA=-1.379;ISTP=0;PRIOR=false;SR=12	0.000998403	0.00143266	.	.	.	.	.
1	89515899	TSD=TATGTGTTTTC;ASSESS=5;INTERNAL=LRRC8B,PROMOTER;SVTYPE=LINE1;SVLEN=6017;MEINFO=L1Ta1d,2,6019,-;DIFF=0.11:n1-2,t231c,t254a,c327t,n421-6019;LP=23;RP=29;RA=-0.334;ISTP=0;PRIOR=false;SR=39;AF=0.00030021;AC=2	.	.	.	0.00030021	.	.	.
1	90416276	TSD=null;ASSESS=4;INTERNAL=null,null;SVTYPE=LINE1;SVLEN=6016;MEINFO=L1Ta1d,2,6018,-;DIFF=0.08:n1,t231c,t254a,n408-6019;LP=2;RP=16;RA=-3;ISTP=0;PRIOR=false;SR=4;AF=0.000199681;AC=1	0.000199681	.	.	.	.	.	.
1	90564758	TSD=TTTTTTCCCATTTTT;ASSESS=5;INTERNAL=null,null;SVTYPE=LINE1;SVLEN=6016;MEINFO=L1Ta1d,3,6019,-;DIFF=0.09:n1-2,t231c,t254a,n442-6019;LP=11;RP=25;RA=-1.184;ISTP=0;PRIOR=false;SR=18;AF=0.000199681;AC=1	0.000199681	.	.	.	.	.	.
1	90896081	TSD=GCCTTTATCAGTTTT;ASSESS=5;INTERNAL=ZNF644,TERMINATOR;SVTYPE=LINE1;SVLEN=6018;MEINFO=L1Ta1d,1,6019,-;DIFF=0.06:g167a,t231c,t254a,c324a,n350-363,n395,n463,n515-6019;LP=1;RP=11;RA=-3.459;ISTP=0;PRIOR=false;SR=12;AF=0.000150105;AC=1	.	.	.	0.000150105	.	.	.
1	91244189	TSD=GAAATACAATACAGCC;ASSESS=5;INTERNAL=null,null;SVTYPE=LINE1;SVLEN=6019;MEINFO=L1Ta1d,0,6019,+;DIFF=0.08:t231c,t254a,t291c,n415-6019;LP=16;RP=4;RA=2;ISTP=0;PRIOR=false;SR=11;AF=0.000199681;AC=1	0.000199681	.	.	.	.	.	.
1	91323865	TSD=CAAAAATACAAACCTTCTATTTTT;ASSESS=5;INTERNAL=NM_001017975,INTRONIC;SVTYPE=LINE1;SVLEN=6017;MEINFO=L1Ta1d,2,6019,-;DIFF=0.06:n1-2,t231c,t254a,t383c,n492-6019;LP=1;RP=13;RA=-3.7;ISTP=0;PRIOR=false;SR=10;GENE=HFM1;AF=0.000199681;AC=1	0.000199681	.	.	.	.	.	.
1	92237947	TSD=null;ASSESS=4;INTERNAL=NM_001012425,INTRONIC;SVTYPE=LINE1;SVLEN=6016;MEINFO=L1Ta1d,2,6018,-;DIFF=0.1:n1,t231c,t254a,a423g,n454-6019;LP=13;RP=18;RA=-0.469;ISTP=0;PRIOR=false;SR=4;GENE=C1orf146;AF=0.000199681;AC=1	0.000199681	.	.	.	.	.	.
1	92290738	TSD=CTTGACTGGTTTTTTA;ASSESS=5;INTERNAL=NM_053274,INTRONIC;SVTYPE=LINE1;SVLEN=6018;MEINFO=L1Ta1d,1,6019,-;DIFF=0.05:c144g,t231c,t254a,n314,n317-319,n322-6019;LP=1;RP=15;RA=-3.907;ISTP=0;PRIOR=false;SR=7	.	.	.	.	.	0.000868056	.
1	93275564	TSD=ATAAATTATTATTT;ASSESS=5;INTERNAL=NM_206886,INTRONIC;SVTYPE=LINE1;SVLEN=6017;MEINFO=L1Ta1d,2,6019,-;DIFF=0.11:n1-2,t231c,t254a,c327t,n333-337,n362,n409,n414,n423,n470,n488-6019;LP=25;RP=35;RA=-0.485;ISTP=0;PRIOR=false;SR=37;GENE=CCDC18;AF=0.000399361;AC=2	0.000399361	.	.	0.000150105	.	.	.
1	94754740	TSD=CCCAAATGTCTTT;ASSESS=5;INTERNAL=LINC01057,INTRONIC;SVTYPE=LINE1;SVLEN=6018;MEINFO=L1Ta1d,1,6019,-;DIFF=0.08:n1,t231c,t254a,n304,n347-6019;LP=5;RP=13;RA=-1.379;ISTP=0;PRIOR=false;SR=6;AF=0.000150105;AC=1	.	.	.	0.000150105	.	.	.
1	95263905	TSD=GGCTTAAACTTTTT;ASSESS=5;INTERNAL=null,null;SVTYPE=LINE1;SVLEN=6018;MEINFO=L1Ta1d,1,6019,-;DIFF=0.11:n1,t231c,t254a,n486,n498-6019;LP=8;RP=19;RA=-1.248;ISTP=0;PRIOR=false;SR=7	0.00219649	0.000716332	.	0.00030021	0.00793651	0.0078125	.
1	95336301	TSD=CACAACTCTACTCTT;ASSESS=5;INTERNAL=null,null;SVTYPE=LINE1;SVLEN=6018;MEINFO=L1Ta,1,6019,-;DIFF=0.13:n1-5384,t5535g,g5538c,n5849,a6006g;LP=1325;RP=2127;RA=-0.683;ISTP=0;PRIOR=false;SR=1749	0.0942492	0.0816619	0.105216	0.0732513	0.0873016	0.0998264	.
1	95392240	TSD=CATTTTCATTCCTTT;ASSESS=5;INTERNAL=LINC01760,PROMOTER;SVTYPE=LINE1;SVLEN=6017;MEINFO=L1Ta,2,6019,-;DIFF=0.11:n1-5592,n5664,c5726a,n5739,t5764a,g5766a,c5780a,c5781a,c5788t,g5789a,c5798a,g5806a,g5841a,a6006g;LP=17;RP=11;RA=0.628;ISTP=0;PRIOR=false;SR=20;AF=0.000150105;AC=1	.	.	.	0.000150105	.	.	.
1	95522185	TSD=GAGAGAACTCATTTTC;ASSESS=5;INTERNAL=NR_110622,TERMINATOR;SVTYPE=LINE1;SVLEN=6019;MEINFO=L1Ambig,0,6019,-;DIFF=0.11:n1-3,g61a,i73g,t231c,t254a,c332t,a341g,n383-497,n510,n516,a599t,n662-6019;LP=7;RP=15;RA=-1.1;ISTP=0;PRIOR=false;SR=13	0.000199681	0.000716332	.	.	.	.	.
1	95735201	TSD=AAGATGCCTATAAGA;ASSESS=5;INTERNAL=null,null;SVTYPE=LINE1;SVLEN=6018;MEINFO=L1Ambig,1,6019,+;DIFF=0.07:n1,g38a,i72c,g83c,t153c,t231c,t254a,g313a,g318a,n342-6019;LP=27;RP=3;RA=3.17;ISTP=0;PRIOR=false;SR=16	0.000399361	.	.	0.00225158	.	0.000868056	.
1	97137580	TSD=TCTCTGCAGACATTCT;ASSESS=5;INTERNAL=DPYD-AS1,INTRONIC;SVTYPE=LINE1;SVLEN=6017;MEINFO=L1Ta1d,2,6019,-;DIFF=0.08:n1-2,t231c,t254a,n351,n354-6019;LP=10;RP=26;RA=-1.379;ISTP=0;PRIOR=false;SR=18;AF=0.00030021;AC=2	.	.	.	0.00030021	.	.	.
1	98919944	TSD=TAAATAACACACCTA;ASSESS=5;INTERNAL=NM_001010861,INTRONIC;SVTYPE=LINE1;SVLEN=6017;MEINFO=L1Ambig,2,6019,+;DIFF=0.11:n1-5539,n5542,n5548,n5550,n5557,n5559,n5561-5562,n5569-5570,n5574,n5577,n5581-5582,n5586,n5590,n5593-5594,n5596,n5598-5600,n5609,n5611,n5614,t5626a,n5636,n5639,a5642t,g5919t,n5920,n5928,n5932-5933,t6012g;LP=18;RP=14;RA=0.363;ISTP=0;PRIOR=false;SR=13;GENE=PLPPR5;AF=0.000199681;AC=1	0.000199681	.	.	.	.	.	.
1	99805669	TSD=AAGAAATACCCGACACTGGG;ASSESS=5;INTERNAL=AGL,PROMOTER;SVTYPE=LINE1;SVLEN=6017;MEINFO=L1Ta1d,2,6019,+;DIFF=0.09:c144g,n217-219,n221,n224-225,n228,t231c,n236,g244a,n246-247,n249,n252-253,t254a,n259-260,n271-272,n274,n278,n282-283,n293-295,t298c,n305,n314,n470-6019;LP=25;RP=14;RA=0.837;ISTP=0;PRIOR=false;SR=49;AF=0.00030021;AC=2	.	.	.	0.00030021	.	.	.
1	100455703	TSD=AGAACTTAACAAATTTTT;ASSESS=5;INTERNAL=NM_003672,INTRONIC;SVTYPE=LINE1;SVLEN=6017;MEINFO=L1Ambig,2,6019,-;DIFF=0.11:n1,i73g,t231c,c251t,t254a,g352a,n425-475,n490,n521,n527,n552,n554,n580,n626-6019;LP=8;RP=23;RA=-1.524;ISTP=0;PRIOR=false;SR=12	0.000399361	0.000716332	.	.	.	.	.
1	100461737	TSD=CAAAAATAAAAGGGGATTTA;ASSESS=5;INTERNAL=CDC14A,INTRONIC;SVTYPE=LINE1;SVLEN=6018;MEINFO=L1Ta1d,1,6019,+;DIFF=0.07:n1,g152c,t231c,t254a,n278,n343-6019;LP=5;RP=9;RA=-0.848;ISTP=0;PRIOR=false;SR=7;AF=0.000150105;AC=1	.	.	.	0.000150105	.	.	.
1	100518151	TSD=null;ASSESS=3;INTERNAL=CDC14A,INTRONIC;SVTYPE=LINE1;SVLEN=6017;MEINFO=L1Ta1d,2,6019,-;DIFF=0.03:n1,n90-217,t231c,t254a,n294-6019;LP=4;RP=5;RA=-0.322;ISTP=-1;PRIOR=false;SR=2	.	.	.	.	.	.	2.04897e-05
1	100672634	TSD=AAAAATGAATTACTC;ASSESS=5;INTERNAL=LINC01349,PROMOTER;SVTYPE=LINE1;SVLEN=6018;MEINFO=L1Ta1d,1,6019,+;DIFF=0.1:n1-3,t231c,t254a,n407-6019;LP=32;RP=22;RA=0.541;ISTP=0;PRIOR=false;SR=37;AF=0.00030021;AC=2	.	.	.	0.00030021	.	.	.
1	101999286	TSD=AAGAAGATGATAATATT;ASSESS=5;INTERNAL=null,null;SVTYPE=LINE1;SVLEN=6019;MEINFO=L1Ta1d,0,6019,+;DIFF=0.09:n1-2,t231c,t254a,n425-6019;LP=26;RP=13;RA=1;ISTP=0;PRIOR=false;SR=18	0.000199681	0.000716332	.	.	.	.	.
1	102103367	TSD=AAGAAAATGAAAGTG;ASSESS=5;INTERNAL=null,null;SVTYPE=LINE1;SVLEN=6012;MEINFO=L1Ambig,7,6019,+;DIFF=0.14:n1-5527,t5535g,g5538c,a5712g,t5827a,a5831t,a5931g,n5989;LP=4384;RP=3029;RA=0.533;ISTP=0;PRIOR=false;SR=3154	0.203474	0.176218	0.270683	0.15776	0.269841	0.255208	.
1	102942862	TSD=GAAAAATGAT;ASSESS=5;INTERNAL=COL11A1,INTRONIC;SVTYPE=LINE1;SVLEN=6018;MEINFO=L1Ta1d,1,6019,+;DIFF=0.07:n1,t231c,t254a,n320-6019;LP=6;RP=5;RA=0.263;ISTP=0;PRIOR=false;SR=2;AF=0.000150105;AC=1	.	.	.	0.000150105	.	.	.
1	103898964	TSD=AAAAATTTGCAGCAGG;ASSESS=5;INTERNAL=null,null;SVTYPE=LINE1;SVLEN=6018;MEINFO=L1Ta1d,1,6019,+;DIFF=0.05:t231c,t254a,n321-6019;LP=35;RP=1;RA=5.129;ISTP=0;PRIOR=false;SR=17	.	.	.	0.00060042	0.015873	.	.
1	104665080	TSD=TTTTTTTTTTTTTT;ASSESS=5;INTERNAL=null,null;SVTYPE=LINE1;SVLEN=6014;MEINFO=L1Ambig,4,6018,+;DIFF=0.06:n1-3,i73g,c143t,t149g,t153c,g156a,n170-198,t231c,g232t,g245t,t254a,c279a,g285a,t288c,t290c,a301c,c305g,g313a,c327t,c332t,c339a,a341g,g352a,g364a,c369g,a373g,g419a,n423-6019;LP=26;RP=67;RA=-1.366;ISTP=0;PRIOR=false;SR=38	.	.	.	.	.	0.00954861	.
1	104696266	TSD=AAAAAAAAAAAAAAAAAAAAAAA;ASSESS=5;INTERNAL=null,null;SVTYPE=LINE1;SVLEN=6017;MEINFO=L1Ambig,1,6018,-;DIFF=0.01:n1-2689,t2712a,g2723a,g2726a,n2822,c2835a,n2841-2902,c2925t,t2931c,n2955-2997,g3020c,c3028a,a3036g,c3115a,n3149-6019;LP=19;RP=6;RA=1.663;ISTP=0;PRIOR=false;SR=15	.	.	.	.	.	0.0373264	.
1	105315166	TSD=GCATTTTTTTCT;ASSESS=5;INTERNAL=null,null;SVTYPE=LINE1;SVLEN=6016;MEINFO=L1Ta1d,3,6019,-;DIFF=0.11:n1-3,t231c,t254a,n413-552,n577,c649g,n675-678,n706-6019;LP=548;RP=933;RA=-0.768;ISTP=0;PRIOR=false;SR=750	0.0289537	0.0365329	.	0.0920144	0.00793651	0.00437063	.
1	105425408	TSD=TATTTTATGTCATTTTA;ASSESS=5;INTERNAL=null,null;SVTYPE=LINE1;SVLEN=6015;MEINFO=L1Ambig,4,6019,-;DIFF=0.12:n1-3,i73g,t231c,t254a,g262c,g352a,g419a,g452t,n482-6019;LP=183;RP=227;RA=-0.311;ISTP=0;PRIOR=false;SR=224	0.00439297	0.00931232	.	0.0130591	.	0.00434028	.
1	107594506	TSD=AAAAAGACTGGATAGG;ASSESS=5;INTERNAL=NM_006113,INTRONIC;SVTYPE=LINE1;SVLEN=6017;MEINFO=L1Ta1d,2,6019,+;DIFF=0.09:n1-2,t231c,t254a,c327t,n348-6019;LP=19;RP=11;RA=0.788;ISTP=0;PRIOR=false;SR=11	0.000199681	0.000716332	.	.	.	.	.
1	107610768	TSD=AAAAATAAGAAATA;ASSESS=5;INTERNAL=NM_006113,INTRONIC;SVTYPE=LINE1;SVLEN=6019;MEINFO=L1Ta1d,0,6019,+;DIFF=0.13:t231c,c445t,n521-6019;LP=21;RP=16;RA=0.392;ISTP=0;PRIOR=false;SR=15	0.000199681	0.000716332	.	.	.	.	.
1	107934241	TSD=GAAAATATTGC;ASSESS=5;INTERNAL=VAV3,INTRONIC;SVTYPE=LINE1;SVLEN=6018;MEINFO=L1Ta,1,6019,+;DIFF=0.1:n1-5582,n5622,n5637,n5662,g5686t,a5837c;LP=12;RP=9;RA=0.415;ISTP=0;PRIOR=false;SR=11;AF=0.000150105;AC=1	.	.	.	0.000150105	.	.	.
1	109792845	TSD=AAAGATCTCAGGA;ASSESS=5;INTERNAL=null,null;SVTYPE=LINE1;SVLEN=6018;MEINFO=L1Ta1d,1,6019,+;DIFF=0.1:n1,g184c,g210c,t231c,t254a,n521-6019;LP=16;RP=6;RA=1.415;ISTP=0;PRIOR=false;SR=10;AF=0.000199681;AC=1	0.000199681	.	.	.	.	.	.
1	110616017	TSD=null;ASSESS=3;INTERNAL=KCNA2,INTRONIC;SVTYPE=LINE1;SVLEN=6010;MEINFO=L1Ta1d,8,6018,+;DIFF=0.11:n1-7,c37t,g61a,t231c,t254a,n404-6019;LP=24;RP=11;RA=1.126;ISTP=0;PRIOR=false;SR=8;AF=0.00030021;AC=2	.	.	.	0.00030021	.	.	.
1	111335146	TSD=AAAAAAAAAAAA;ASSESS=5;INTERNAL=PIFO,PROMOTER;SVTYPE=LINE1;SVLEN=6015;MEINFO=L1Ambig,3,6018,-;DIFF=0.02:n1-2,i73g,t133a,g138a,c143t,t149g,n153-6019;LP=15;RP=1;RA=3.907;ISTP=0;PRIOR=false;SR=4;AF=0.00120084;AC=8	.	.	.	0.00120084	.	.	.
1	112038343	TSD=AAGATTTTTCCACTTCTG;ASSESS=5;INTERNAL=null,null;SVTYPE=LINE1;SVLEN=6016;MEINFO=L1Ta1d,3,6019,+;DIFF=0.07:n1-2,t231c,t254a,n339-6019;LP=16;RP=2;RA=3;ISTP=0;PRIOR=false;SR=24	.	.	.	.	.	0.000868056	.
1	112324206	TSD=CCAACAGAGGTCTTT;ASSESS=5;INTERNAL=null,null;SVTYPE=LINE1;SVLEN=6019;MEINFO=L1Ta1d,0,6019,-;DIFF=0.1:g210c,t231c,t254a,a388g,n483-6019;LP=6;RP=21;RA=-1.807;ISTP=0;PRIOR=false;SR=13	0.000199681	0.000716332	.	.	.	.	.
1	112514536	TSD=ATGTTTATT;ASSESS=5;INTERNAL=WNT2B,INTRONIC;SVTYPE=LINE1;SVLEN=6007;MEINFO=L1Ta1d,12,6019,-;DIFF=0.12:n1-12,t231c,t254a,n356-388,n540-6019;LP=5;RP=15;RA=-1.585;ISTP=0;PRIOR=false;SR=11;AF=0.000150105;AC=1	.	.	.	0.000150105	.	.	.
1	112741592	TSD=GAGTTTTATCTT;ASSESS=5;INTERNAL=null,null;SVTYPE=LINE1;SVLEN=6017;MEINFO=L1Ambig,2,6019,-;DIFF=0.1:n1,c54g,i73g,t123c,t231c,t254a,n344-354,n361,a373g,n378,a423g,n451,n505-6019;LP=23;RP=35;RA=-0.606;ISTP=0;PRIOR=false;SR=31;AF=0.000399361;AC=2	0.000399361	.	.	.	.	.	.
1	113329194	TSD=AAGATGCAAATGATG;ASSESS=5;INTERNAL=null,null;SVTYPE=LINE1;SVLEN=6014;MEINFO=L1Ta1d,4,6018,+;DIFF=0.13:n1-3,n489-6019;LP=15;RP=14;RA=0.1;ISTP=0;PRIOR=false;SR=6;AF=0.000199681;AC=1	0.000199681	.	.	.	.	.	.
1	113340532	TSD=TCAATGCCATATT;ASSESS=5;INTERNAL=MAGI3,PROMOTER;SVTYPE=LINE1;SVLEN=6019;MEINFO=L1Ta1d,0,6019,-;DIFF=0.09:n370-6019;LP=15;RP=41;RA=-1.451;ISTP=0;PRIOR=false;SR=31;AF=0.00030021;AC=2	.	.	.	0.00030021	.	.	.
1	113462767	TSD=AAGAAAACTGAAGGAG;ASSESS=5;INTERNAL=MAGI3,INTRONIC;SVTYPE=LINE1;SVLEN=6018;MEINFO=L1Ta1d,1,6019,+;DIFF=0.09:n1,t231c,t254a,n396-6019;LP=34;RP=18;RA=0.918;ISTP=0;PRIOR=false;SR=30;AF=0.00060042;AC=4	.	.	.	0.00060042	.	.	.
1	113521104	TSD=CATTTTTTTTTTTTTTTT;ASSESS=5;INTERNAL=MAGI3,INTRONIC;SVTYPE=LINE1;SVLEN=6017;MEINFO=L1Ta1d,2,6019,-;DIFF=0.07:n1-2,t231c,t254a,n395-6019;LP=9;RP=16;RA=-0.83;ISTP=0;PRIOR=false;SR=7;AF=0.000150105;AC=1	.	.	.	0.000150105	.	.	.
1	113666035	TSD=AAAAAACAATATACA;ASSESS=5;INTERNAL=MAGI3,INTRONIC;SVTYPE=LINE1;SVLEN=6018;MEINFO=L1Ta1d,1,6019,+;DIFF=0.08:n1,g152c,t231c,t254a,n356-6019;LP=8;RP=8;RA=0;ISTP=0;PRIOR=false;SR=11;AF=0.000150105;AC=1	.	.	.	0.000150105	.	.	.
1	114285296	TSD=GAAAAAGGTCTTA;ASSESS=5;INTERNAL=null,null;SVTYPE=LINE1;SVLEN=6019;MEINFO=L1Ta1d,0,6019,+;DIFF=0.09:n1-2,t231c,t254a,g285a,c327t,n487-6019;LP=17;RP=8;RA=1.087;ISTP=0;PRIOR=false;SR=11	0.00179712	0.000716332	.	.	.	.	.
1	115081700	TSD=AAAGAGACTAAATGAG;ASSESS=5;INTERNAL=TSPAN2,INTRONIC;SVTYPE=LINE1;SVLEN=6018;MEINFO=L1Ta1d,1,6019,+;DIFF=0.12:c37a,t231c,g252c,t254a,g285a,n318-330,t335g,c363t,n488-587,n593-594,n596,t602g,n605,n607,n609-611,n613,n625,n637,n644,c651t,n652,n663-665,n667,n671,n675-679,n685,n687,n703,a713t,n739-6019;LP=24;RP=23;RA=0.061;ISTP=0;PRIOR=false;SR=27;AF=0.00030021;AC=2	.	.	.	0.00030021	.	.	.
1	115531965	TSD=TATTCCTTTACATTCTT;ASSESS=5;INTERNAL=null,null;SVTYPE=LINE1;SVLEN=6018;MEINFO=L1Ta1d,1,6019,-;DIFF=0.1:t231c,t254a,c324a,n468-6019;LP=15;RP=16;RA=-0.093;ISTP=0;PRIOR=false;SR=14;AF=0.000199681;AC=1	0.000199681	.	.	.	.	.	.
1	115541911	TSD=AATATCTACCCTTCTT;ASSESS=5;INTERNAL=null,null;SVTYPE=LINE1;SVLEN=6019;MEINFO=L1Ta1d,0,6019,-;DIFF=0.11:n1-2,t231c,t254a,n281,n287,n290,n295-330,n481-6019;LP=66;RP=110;RA=-0.737;ISTP=0;PRIOR=false;SR=82	0.00259585	0.00429799	.	0.0030021	0.015873	0.0182292	.
1	115864697	TSD=GGAAATTTTTTTT;ASSESS=5;INTERNAL=NHLH2,PROMOTER;SVTYPE=LINE1;SVLEN=6016;MEINFO=L1Ta,3,6019,-;DIFF=0.09:n1-5595,a5642t,n5747,t5757a,t5764a,c5765a,n5766,n5773,g5823c,g5875a,t6012g;LP=11;RP=10;RA=0.138;ISTP=0;PRIOR=false;SR=5;AF=0.000150105;AC=1	.	.	.	0.000150105	.	.	.
1	116005410	TSD=CTCCATAGGATTTT;ASSESS=5;INTERNAL=NM_018420,INTRONIC;SVTYPE=LINE1;SVLEN=6017;MEINFO=L1Ambig,2,6019,-;DIFF=0.1:n1,i73g,c89t,c115a,c143t,c160t,g167a,t188c,t231c,t254a,c255t,c257t,g292a,n339-6019;LP=262;RP=474;RA=-0.855;ISTP=0;PRIOR=false;SR=383	0.0249601	0.0451289	.	0.0830081	0.00793651	0.0112847	.
1	116261479	TSD=GAGACCGTTATAATTTT;ASSESS=5;INTERNAL=null,null;SVTYPE=LINE1;SVLEN=6012;MEINFO=L1Ambig,7,6019,-;DIFF=0.1:n1-6,i73g,c115a,c143t,g167a,t193g,t231c,t254a,c257t,g352a,n532-6019;LP=11;RP=38;RA=-1.788;ISTP=0;PRIOR=false;SR=31;AF=0.000399361;AC=2	0.000399361	.	.	.	.	.	.
1	116639831	TSD=null;ASSESS=3;INTERNAL=NM_001007237,INTRONIC;SVTYPE=LINE1;SVLEN=6010;MEINFO=L1Ta1d,8,6018,+;DIFF=0.09:n1-7,t231c,t254a,c327t,a334t,n337-6019;LP=10;RP=9;RA=0.152;ISTP=0;PRIOR=false;SR=5;GENE=IGSF3;AF=0.000199681;AC=1	0.000199681	.	.	0.000150105	.	.	.
1	118473332	TSD=AGAAGTTCTGGATTTT;ASSESS=5;INTERNAL=SPAG17,PROMOTER;SVTYPE=LINE1;SVLEN=6019;MEINFO=L1Ta1d,0,6019,-;DIFF=0.05:t231c,t254a,n336-402,a408c,g416c,a426c,c506a,a519t,n554-6019;LP=1;RP=15;RA=-3.907;ISTP=0;PRIOR=false;SR=13;AF=0.000150105;AC=1	.	.	.	0.000150105	.	.	.
1	118492997	TSD=AAGAAA;ASSESS=5;INTERNAL=null,null;SVTYPE=LINE1;SVLEN=6008;MEINFO=L1Ta1d,11,6019,+;DIFF=0.1:n1-11,g53a,c90t,t231c,t254a,c324a,n427-6019;LP=78;RP=51;RA=0.613;ISTP=0;PRIOR=false;SR=60;AF=0.00119808;AC=6	0.00119808	.	.	.	.	.	.
1	119072160	TSD=AAGAAGCAAAAGCC;ASSESS=5;INTERNAL=NM_015836,INTRONIC;SVTYPE=LINE1;SVLEN=6019;MEINFO=L1Ta1d,0,6019,+;DIFF=0.11:n1-13,g210c,t231c,t254a,a388g,n451,n459-483,n634-6019;LP=18;RP=4;RA=2.17;ISTP=0;PRIOR=false;SR=10	0.000199681	0.000716332	.	.	.	.	.
1	119195312	TSD=CTGATTGCTTCTTT;ASSESS=5;INTERNAL=LOC101929147,INTRONIC;SVTYPE=LINE1;SVLEN=6018;MEINFO=L1Ta1d,1,6019,-;DIFF=0.06:t231c,t254a,n381-6019;LP=9;RP=18;RA=-1;ISTP=0;PRIOR=false;SR=18;AF=0.000150105;AC=1	.	.	.	0.000150105	.	.	.
1	119544148	TSD=TAATTTTT;ASSESS=5;INTERNAL=null,null;SVTYPE=LINE1;SVLEN=6018;MEINFO=L1Ta1d,1,6019,-;DIFF=0.12:n1,t231c,t254a,a423g,n482-6019;LP=13;RP=16;RA=-0.3;ISTP=0;PRIOR=false;SR=6;AF=0.000199681;AC=1	0.000199681	.	.	.	.	.	.
1	119900562	TSD=TTATTTCATTTTTT;ASSESS=5;INTERNAL=ADAM30,PROMOTER;SVTYPE=LINE1;SVLEN=6017;MEINFO=L1Ta1d,2,6019,-;DIFF=0.07:n1,g253c,n286,n290-6019;LP=7;RP=11;RA=-0.652;ISTP=0;PRIOR=false;SR=14;AF=0.000150105;AC=1	.	.	.	0.000150105	.	.	.
1	119965104	TSD=AAGAAACACAGAGCC;ASSESS=5;INTERNAL=NM_001200001,INTRONIC;SVTYPE=LINE1;SVLEN=6019;MEINFO=L1Ta1d,0,6019,+;DIFF=0.05:c37a,t231c,g252c,t254a,g285a,n328-6019;LP=10;RP=1;RA=3.322;ISTP=0;PRIOR=false;SR=12	.	.	.	0.00030021	.	0.000868056	.
1	120041539	TSD=null;ASSESS=3;INTERNAL=NM_001200001,INTRONIC;SVTYPE=LINE1;SVLEN=6016;MEINFO=L1Ta,2,6018,-;DIFF=0.06:n1-5689,a5842g;LP=3;RP=6;RA=-1;ISTP=-1;PRIOR=false;SR=4	0.000199681	0.000716332	.	.	.	.	.
1	120763922	TSD=null;ASSESS=3;INTERNAL=null,null;SVTYPE=LINE1;SVLEN=6010;MEINFO=L1Ta,8,6018,+;DIFF=0.07:n1-5530,n5675,n5679,n5681,c5899t;LP=5;RP=10;RA=-1;ISTP=0;PRIOR=false;SR=2	0.00047259	0.000886525	.	.	.	.	.
1	123837398	TSD=null;ASSESS=3;INTERNAL=null,null;SVTYPE=LINE1;SVLEN=6010;MEINFO=L1Ta1d,8,6018,+;DIFF=0.05:n1-7,t231c,t254a,c327t,n377-6019;LP=1;RP=8;RA=-3;ISTP=0;PRIOR=false;SR=6;AF=0.000652742;AC=3	0.000652742	.	.	.	.	.	.
1	147764996	TSD=CAATAAATGCTTTCTT;ASSESS=5;INTERNAL=NM_005266,INTRONIC;SVTYPE=LINE1;SVLEN=6016;MEINFO=L1Ambig,3,6019,-;DIFF=0.12:n1-3,i73g,c115a,g167a,t231c,t254a,c257t,n318-381,n383,n551-6019;LP=12;RP=14;RA=-0.222;ISTP=0;PRIOR=false;SR=17	0.00139776	0.000716332	.	0.000750525	.	.	.
1	149977842	TSD=TGAGTACTGCTTTTCT;ASSESS=5;INTERNAL=NM_020205,INTRONIC;SVTYPE=LINE1;SVLEN=6017;MEINFO=L1Ta1d,2,6019,-;DIFF=0.09:n1-2,t231c,t254a,n391-419,a423g,n455,n460,n464,n470,n472,n474,n494-495,n500,n516,n563,n567-6019;LP=8;RP=17;RA=-1.087;ISTP=0;PRIOR=false;SR=5;GENE=OTUD7B;AF=0.000199681;AC=1	0.000199681	.	.	.	.	.	.
1	152471419	TSD=TTTTATTTTTT;ASSESS=5;INTERNAL=null,null;SVTYPE=LINE1;SVLEN=6019;MEINFO=L1Ta,0,6019,-;DIFF=0.08:n1-5622,n5742;LP=1715;RP=836;RA=1.037;ISTP=0;PRIOR=false;SR=1436	0.104034	0.0924069	0.056205	0.0667968	0.0396825	0.0598958	.
1	152931035	TSD=AAAAAGTTACATACATA;ASSESS=5;INTERNAL=IVL,TERMINATOR;SVTYPE=LINE1;SVLEN=6017;MEINFO=L1Ta1d,2,6019,+;DIFF=0.1:n1-2,t231c,t254a,n402-6019;LP=16;RP=12;RA=0.415;ISTP=0;PRIOR=false;SR=25;AF=0.000150105;AC=1	.	.	.	0.000150105	.	.	.
1	155197669	TSD=TGGGGTGGG;ASSESS=5;INTERNAL=LOC105371450,INTRONIC;SVTYPE=LINE1;SVLEN=6014;MEINFO=L1Ambig,4,6018,-;DIFF=0.05:n1-4815,c4841t,n4854,n4870-4994,a5006c,t5064c,n5071-5114,n5120,t5154a,n5172-5368,c5391t,n5445-5452,n5518-5547,c5590t,a5632t,g5637a,g5701t,a5712g,n5716-5850,g5870t,c5878g,n5916,n5926-6019;LP=16;RP=31;RA=-0.954;ISTP=0;PRIOR=false;SR=9	.	.	.	.	.	.	0.00340486
1	156139317	TSD=AAAAAAAAAAAAAA;ASSESS=5;INTERNAL=LMNA,3_UTR;SVTYPE=LINE1;SVLEN=6004;MEINFO=L1Ambig,14,6018,-;DIFF=0.04:n1-4949,g4957a,c4977t,n5002-5076,n5095,n5105,g5110a,a5117c,n5153-5217,g5268a,n5294-5334,c5391t,n5420-5725,c5744t,g5789a,n5835,n5837,n5844,n5873-5942,a5989t,g6014a,n6018-6019;LP=24;RP=12;RA=1;ISTP=0;PRIOR=false;SR=12	.	.	.	.	.	.	0.00014103
1	157601992	TSD=AAATTTGTTGTTCTT;ASSESS=5;INTERNAL=NM_031282,PROMOTER;SVTYPE=LINE1;SVLEN=6019;MEINFO=L1Ta,0,6019,-;DIFF=0.09:n1-5762,n5766-5767,n5773,n5781,c5787a,n5938,g5963a,n5985;LP=10;RP=25;RA=-1.322;ISTP=0;PRIOR=false;SR=18	.	.	.	.	.	0.00173611	.
1	158726426	TSD=CAAGAAAGTTTATATT;ASSESS=5;INTERNAL=NM_001005327,PROMOTER;SVTYPE=LINE1;SVLEN=6017;MEINFO=L1Ta1d,2,6019,-;DIFF=0.11:n1,g182a,t231c,t254a,n483-6019;LP=98;RP=182;RA=-0.893;ISTP=0;PRIOR=false;SR=166	0.00698882	0.00716332	.	0.0291204	.	.	.
1	158883936	TSD=AAAATATTAAGTGAGA;ASSESS=5;INTERNAL=null,null;SVTYPE=LINE1;SVLEN=6014;MEINFO=L1Ta1d,5,6019,+;DIFF=0.13:n1-4,g167a,t231c,t254a,c324a,c529a,n624-6019;LP=97;RP=55;RA=0.819;ISTP=0;PRIOR=false;SR=72	0.00159744	0.00358166	.	0.00795557	.	.	.
1	159066526	TSD=CAGAAGGAAGATTTC;ASSESS=5;INTERNAL=NM_004833,INTRONIC;SVTYPE=LINE1;SVLEN=6019;MEINFO=L1Ta1d,0,6019,-;DIFF=0.1:c144g,t231c,t254a,n473-6019;LP=4;RP=22;RA=-2.459;ISTP=0;PRIOR=false;SR=14;GENE=AIM2;AF=0.000199681;AC=1	0.000199681	.	.	.	.	.	.
1	159211799	TSD=TAATTAATTTC;ASSESS=5;INTERNAL=NM_001122951,TERMINATOR;SVTYPE=LINE1;SVLEN=6017;MEINFO=L1Ta1d,2,6019,-;DIFF=0.1:n1,a177t,t231c,t254a,c324a,n432-6019;LP=8;RP=16;RA=-1;ISTP=0;PRIOR=false;SR=10;AF=0.000199681;AC=1	0.000199681	.	.	0.000750525	.	.	.
1	160555098	TSD=TTTTTTTTTTTTTTTT;ASSESS=5;INTERNAL=NM_001184879,INTRONIC;SVTYPE=LINE1;SVLEN=6017;MEINFO=L1Ta1d,2,6019,-;DIFF=0.1:n1-2,t231c,t254a,n430,n433-6019;LP=34;RP=47;RA=-0.467;ISTP=0;PRIOR=false;SR=29;GENE=LOC105371468;AF=0.000399361;AC=2	0.000399361	.	.	.	.	.	.
1	162640850	TSD=AAAGAATAGTCATTTTT;ASSESS=5;INTERNAL=NM_001014796,INTRONIC;SVTYPE=LINE1;SVLEN=6019;MEINFO=L1Ta1d,0,6019,+;DIFF=0.09:n1-2,t231c,t254a,c327t,n442-6019;LP=93;RP=41;RA=1.182;ISTP=0;PRIOR=false;SR=41	0.00299521	0.00358166	.	0.00195137	0.00793651	0.0078125	.
1	162768919	TSD=AGAATGCTGGA;ASSESS=5;INTERNAL=NM_001014796,INTRONIC;SVTYPE=LINE1;SVLEN=6018;MEINFO=L1Ta1d,1,6019,+;DIFF=0.05:n1,g210c,t231c,t254a,n322-433,n440,n442,n535-6019;LP=30;RP=1;RA=4.907;ISTP=0;PRIOR=false;SR=12;GENE=DDR2	.	.	.	.	0.00793651	.	.
1	162951613	TSD=TAGTTACATATATTTT;ASSESS=5;INTERNAL=null,null;SVTYPE=LINE1;SVLEN=6017;MEINFO=L1Ta1d,2,6019,-;DIFF=0.09:n1-2,t231c,t254a,n401-417,n469,n568-6019;LP=6;RP=15;RA=-1.322;ISTP=0;PRIOR=false;SR=10	0.000599042	0.000716332	.	0.000450315	.	.	.
1	163058663	TSD=null;ASSESS=3;INTERNAL=NM_001102445,PROMOTER;SVTYPE=LINE1;SVLEN=6019;MEINFO=L1Ta1d,0,6019,-;DIFF=0.04:g210c,t231c,n249-251,t254a,n256,n258-259,n261-262,n265-266,n269-270,n272-273,n282,n296,n299-300,n304-306,n323,n326,n338-6019;LP=1;RP=11;RA=-3.459;ISTP=-1;PRIOR=false;SR=4	.	.	.	.	.	0.000868056	.
1	163803563	TSD=CCTAATGCTTTC;ASSESS=5;INTERNAL=null,null;SVTYPE=LINE1;SVLEN=6016;MEINFO=L1Ta,3,6019,-;DIFF=0.1:n1-5634,c5945t,g5999c;LP=206;RP=233;RA=-0.178;ISTP=0;PRIOR=false;SR=279	0.00758786	0.0143266	.	0.0306214	.	0.00434783	.
1	164179001	TSD=TAGACATACAGGTCTCTT;ASSESS=5;INTERNAL=null,null;SVTYPE=LINE1;SVLEN=6018;MEINFO=L1Ta1d,1,6019,-;DIFF=0.11:c144g,t231c,t254a,n385-6019;LP=13;RP=12;RA=0.115;ISTP=0;PRIOR=false;SR=19;AF=0.000199681;AC=1	0.000199681	.	.	.	.	.	.
1	164599310	TSD=TATAATTCTTTCTT;ASSESS=5;INTERNAL=PBX1,INTRONIC;SVTYPE=LINE1;SVLEN=6019;MEINFO=L1Ta1d,0,6019,-;DIFF=0.05:g210c,t231c,t254a,n325-605,c645t,n648,n652,n675-679,n681,n683,t708c,c718t,n728,n736,n743,n745,n750,n759-6019;LP=2;RP=17;RA=-3.087;ISTP=0;PRIOR=false;SR=12;AF=0.000150105;AC=1	.	.	.	0.000150105	.	.	.
1	165437177	TSD=null;ASSESS=3;INTERNAL=RXRG,3_UTR;SVTYPE=LINE1;SVLEN=6016;MEINFO=L1Ambig,3,6019,-;DIFF=0.02:n1-2,n60-93,n170-6019;LP=2;RP=7;RA=-1.807;ISTP=-1;PRIOR=false;SR=2	.	.	.	.	.	.	1.00735e-05
1	165583912	TSD=TTTACCATAATTCT;ASSESS=5;INTERNAL=null,null;SVTYPE=LINE1;SVLEN=6019;MEINFO=L1Ambig,0,6019,-;DIFF=0.11:i73g,t231c,c251t,t254a,g352a,n383,n387,n485-6019;LP=2007;RP=3279;RA=-0.708;ISTP=0;PRIOR=false;SR=2614	0.121006	0.124642	0.142986	0.0372261	0.0634921	0.0850694	.
1	166476758	TSD=AAAGAGATAAATGC;ASSESS=5;INTERNAL=null,null;SVTYPE=LINE1;SVLEN=6019;MEINFO=L1Ta1d,0,6019,+;DIFF=0.13:g167a,t231c,t254a,c324a,n411,c529a,n581,n583,n593-594,n599-600,n610,n614,n621,n646,n656-6019;LP=131;RP=92;RA=0.51;ISTP=0;PRIOR=false;SR=104	0.00319489	0.00573066	.	0.00720504	.	.	.
1	166703732	TSD=CATAGTTTCTTTATT;ASSESS=5;INTERNAL=null,null;SVTYPE=LINE1;SVLEN=6017;MEINFO=L1Ta1d,2,6019,-;DIFF=0.06:g210c,t231c,t254a,n359-6019;LP=2;RP=12;RA=-2.585;ISTP=0;PRIOR=false;SR=12;AF=0.000199681;AC=1	0.000199681	.	.	.	.	.	.
1	167388678	TSD=AAAACAAATAAAAATGC;ASSESS=5;INTERNAL=POU2F1,INTRONIC;SVTYPE=LINE1;SVLEN=6019;MEINFO=L1Ta,0,6019,+;DIFF=0.09:n1-5570,a5763t;LP=15;RP=17;RA=-0.181;ISTP=0;PRIOR=false;SR=16;AF=0.000150105;AC=1	.	.	.	0.000150105	.	.	.
1	168788213	TSD=GAAATGGATATC;ASSESS=5;INTERNAL=LINC00626,INTRONIC;SVTYPE=LINE1;SVLEN=6019;MEINFO=L1Ta1d,0,6019,+;DIFF=0.09:c21t,n353-6019;LP=14;RP=7;RA=1;ISTP=0;PRIOR=false;SR=7;AF=0.000150105;AC=1	.	.	.	0.000150105	.	.	.
1	172152504	TSD=CTCACCCTGTGATTCTT;ASSESS=5;INTERNAL=DNM3,INTRONIC;SVTYPE=LINE1;SVLEN=6013;MEINFO=L1Ta1d,6,6019,-;DIFF=0.04:n1-4,g38a,c65a,g97a,c115a,c143t,g167a,t231c,t254a,c257t,n283-6019;LP=1;RP=7;RA=-2.807;ISTP=0;PRIOR=false;SR=9;AF=0.000150105;AC=1	.	.	.	0.000150105	.	.	.
1	173398384	TSD=AAAAATTCAAGGGCC;ASSESS=5;INTERNAL=NR_037845,INTRONIC;SVTYPE=LINE1;SVLEN=6018;MEINFO=L1Ta1d,1,6019,+;DIFF=0.05:n1,t231c,t254a,n337,n404-6019;LP=17;RP=1;RA=4.087;ISTP=0;PRIOR=false;SR=7	.	0.000716332	.	.	.	.	.
1	174406107	TSD=GCTTATGGTTAATTTTTTT;ASSESS=5;INTERNAL=RABGAP1L,INTRONIC;SVTYPE=LINE1;SVLEN=6018;MEINFO=L1Ta1d,1,6019,-;DIFF=0.07:n1-3,c115a,g167a,t231c,t254a,c257t,n291,a303c,a316c,n337-6019;LP=5;RP=6;RA=-0.263;ISTP=0;PRIOR=false;SR=9;GENE=RABGAP1L	.	.	0.00044964	.	.	.	.
1	174691700	TSD=AATATTTTATTTA;ASSESS=5;INTERNAL=RABGAP1L,INTRONIC;SVTYPE=LINE1;SVLEN=6017;MEINFO=L1Ta1d,2,6019,+;DIFF=0.09:n1-2,t231c,t254a,n440-6019;LP=75;RP=62;RA=0.275;ISTP=0;PRIOR=false;SR=82;AF=0.000750525;AC=5	.	.	.	0.000750525	.	.	.
1	175420815	TSD=AAAGAAGTGCTCTG;ASSESS=5;INTERNAL=NM_003285,INTRONIC;SVTYPE=LINE1;SVLEN=6018;MEINFO=L1Ta1d,1,6019,+;DIFF=0.09:t231c,t254a,n370-452,n471,n494,n547,n600-6019;LP=15;RP=8;RA=0.907;ISTP=0;PRIOR=false;SR=10;GENE=TNR;AF=0.000199681;AC=1	0.000199681	.	.	.	.	.	.
1	175619074	TSD=GAAAAGAGACCTTGC;ASSESS=5;INTERNAL=NM_003285,INTRONIC;SVTYPE=LINE1;SVLEN=6016;MEINFO=L1Ta1d,2,6018,-;DIFF=0.06:n1,t231c,t254a,n297-6019;LP=38;RP=32;RA=0.248;ISTP=0;PRIOR=false;SR=15;GENE=TNR;AF=0.000399361;AC=2	0.000399361	.	.	.	.	.	.
1	176314452	TSD=TTTTTTTTTTGTTGTTTTTTTTTTTTTTTT;ASSESS=5;INTERNAL=null,null;SVTYPE=LINE1;SVLEN=6015;MEINFO=L1Ambig,3,6018,+;DIFF=0.01:n1-2,n38,g39c,n54-6019;LP=45;RP=35;RA=0.363;ISTP=0;PRIOR=false;SR=87	0.230431	.	0.0548561	0.138247	.	0.0625	.
1	176561621	TSD=AAAATCCATTCTTTTTA;ASSESS=5;INTERNAL=NM_020318,INTRONIC;SVTYPE=LINE1;SVLEN=6017;MEINFO=L1Ta1d,2,6019,-;DIFF=0.11:n1,n496,n529-6019;LP=13;RP=24;RA=-0.885;ISTP=0;PRIOR=false;SR=17;GENE=PAPPA2;AF=0.000199681;AC=1	0.000199681	.	.	.	.	.	.
1	176697585	TSD=ACCACCAACTATTTTCT;ASSESS=5;INTERNAL=NM_020318,INTRONIC;SVTYPE=LINE1;SVLEN=6018;MEINFO=L1Ambig,1,6019,-;DIFF=0.11:n1-3,i73g,c164t,t231c,t254a,g352a,n457-473,n475,n496,n571,n594,n624-6019;LP=11;RP=17;RA=-0.628;ISTP=0;PRIOR=false;SR=13;GENE=PAPPA2;AF=0.000199681;AC=1	0.000199681	.	.	.	.	.	.
1	176989516	TSD=AGAAAAACAAAATAGGG;ASSESS=5;INTERNAL=NM_207108,INTRONIC;SVTYPE=LINE1;SVLEN=6012;MEINFO=L1Ta1d,7,6019,+;DIFF=0.09:n1-7,t231c,t254a,c327t,n412-420,n424,n460,n471,n571-6019;LP=22;RP=3;RA=2.874;ISTP=0;PRIOR=false;SR=7;GENE=ASTN1;AF=0.000199681;AC=1	0.000199681	.	.	.	.	.	.
1	179466303	TSD=TTTTTTTTTTTTTTTTTT;ASSESS=5;INTERNAL=AXDND1,INTRONIC;SVTYPE=LINE1;SVLEN=6007;MEINFO=L1Ambig,11,6018,+;DIFF=0:n1-424,g428c,c445a,c454t,c455t,a456g,c463a,t464g,c478t,a479g,g483t,c491g,c495a,n572-6019;LP=1;RP=3;RA=-1.585;ISTP=0;PRIOR=false;SR=2;GENE=AXDND1	.	.	0.00179856	.	.	.	.
1	179509962	TSD=AAAACTCTAGAACT;ASSESS=5;INTERNAL=NR_073544,INTRONIC;SVTYPE=LINE1;SVLEN=6018;MEINFO=L1Ta1d,1,6019,+;DIFF=0.05:n1,g167a,t231c,t254a,c324a,n351-6019;LP=17;RP=2;RA=3.087;ISTP=0;PRIOR=false;SR=6	.	.	.	.	.	0.000868056	.
1	180071642	TSD=AAAAATTAGCCGGG;ASSESS=5;INTERNAL=NM_014810,INTRONIC;SVTYPE=LINE1;SVLEN=6018;MEINFO=L1Ta1d,1,6019,+;DIFF=0.1:n1,t231c,t254a,c324a,n387,n421-6019;LP=23;RP=9;RA=1.354;ISTP=0;PRIOR=false;SR=19;GENE=CEP350;AF=0.000199681;AC=1	0.000199681	.	.	.	.	.	.
1	181669550	TSD=CTCGTTACGTTATTTT;ASSESS=5;INTERNAL=CACNA1E,INTRONIC;SVTYPE=LINE1;SVLEN=6018;MEINFO=L1Ta1d,1,6019,-;DIFF=0.1:g167a,t231c,t254a,c324a,n415-6019;LP=28;RP=47;RA=-0.747;ISTP=0;PRIOR=false;SR=44;AF=0.000750525;AC=5	.	.	.	0.000750525	.	.	.
1	182470934	TSD=AAGAAATCACCTGCTA;ASSESS=5;INTERNAL=RGSL1,INTRONIC;SVTYPE=LINE1;SVLEN=6006;MEINFO=L1Ta1d,13,6019,+;DIFF=0.09:n1-12,n392-6019;LP=33;RP=32;RA=0.044;ISTP=0;PRIOR=false;SR=29;AF=0.00030021;AC=2	.	.	.	0.00030021	.	.	.
1	183630293	TSD=GGAATCAGAATCTCTT;ASSESS=5;INTERNAL=ARPC5,INTRONIC;SVTYPE=LINE1;SVLEN=6019;MEINFO=L1Ta,0,6019,-;DIFF=0.1:n1-5583;LP=14;RP=9;RA=0.637;ISTP=0;PRIOR=false;SR=15;AF=0.000150105;AC=1	.	.	.	0.000150105	.	.	.
1	184076681	TSD=GAAAAGTTATGGAAAGA;ASSESS=5;INTERNAL=NM_001127394,TERMINATOR;SVTYPE=LINE1;SVLEN=6017;MEINFO=L1Ambig,2,6019,+;DIFF=0.09:n1-2,g61a,i73g,g103a,t231c,t254a,n326,g352a,n387-396,n405,n463,n517,n547-6019;LP=26;RP=22;RA=0.241;ISTP=0;PRIOR=false;SR=22;GENE=TSEN15;AF=0.000399361;AC=2	0.000399361	.	.	.	.	.	.
1	184515409	TSD=CATGTCCTCAGTTTTT;ASSESS=5;INTERNAL=NM_030806,INTRONIC;SVTYPE=LINE1;SVLEN=6019;MEINFO=L1Ambig,0,6019,-;DIFF=0.1:n1-3,i73g,g156a,t231c,t254a,g352a,c463a,n475-6019;LP=20;RP=40;RA=-1;ISTP=0;PRIOR=false;SR=20	.	0.00143266	.	.	.	.	.
1	185413438	TSD=AAGATTACAGTCTT;ASSESS=5;INTERNAL=null,null;SVTYPE=LINE1;SVLEN=6018;MEINFO=L1Ta1d,1,6019,-;DIFF=0.09:n1,c144g,t231c,t254a,n647-6019;LP=1;RP=19;RA=-4.248;ISTP=0;PRIOR=false;SR=10	0.000399361	0.000716332	.	.	.	.	.
1	185473142	TSD=AGAATTAAATTTTA;ASSESS=5;INTERNAL=null,null;SVTYPE=LINE1;SVLEN=6018;MEINFO=L1Ta1d,1,6019,-;DIFF=0.12:n480-6019;LP=9;RP=15;RA=-0.737;ISTP=0;PRIOR=false;SR=18;AF=0.000199681;AC=1	0.000199681	.	.	.	.	.	.
1	185865719	TSD=null;ASSESS=3;INTERNAL=HMCN1,INTRONIC;SVTYPE=LINE1;SVLEN=6015;MEINFO=L1Ta1d,3,6018,+;DIFF=0.06:n1-2,n106,n213-6019;LP=6;RP=7;RA=-0.222;ISTP=0;PRIOR=false;SR=1	.	.	.	.	.	.	5.03677e-05
1	186767008	TSD=CCTTTATTAAATTTTT;ASSESS=5;INTERNAL=null,null;SVTYPE=LINE1;SVLEN=6019;MEINFO=L1Ta1d,0,6019,-;DIFF=0.11:n1-14,t231c,t254a,c324a,n464,n492-6019;LP=18;RP=21;RA=-0.222;ISTP=0;PRIOR=false;SR=17	0.000599042	0.000716332	.	0.000450315	.	0.000868056	.
1	187528136	TSD=AGAAAAGGAAAATGTGA;ASSESS=5;INTERNAL=null,null;SVTYPE=LINE1;SVLEN=6018;MEINFO=L1Ta,1,6019,+;DIFF=0.12:n1-5399,n5431,n5470,n5472-5473,n5478,n5483,n5487,n5492,n5496-5497,n5501,n5508,n5513-5515,n5531,n5540,n5550-5589,n5981,n5985-5986,n5989-5991,n5993,n5998,n6002-6019;LP=125;RP=72;RA=0.796;ISTP=0;PRIOR=false;SR=76	0.00319489	0.00501433	.	0.0121585	.	.	.
1	188166604	TSD=GACAATTTCACTTTTATTT;ASSESS=5;INTERNAL=null,null;SVTYPE=LINE1;SVLEN=6018;MEINFO=L1Ta1d,1,6019,-;DIFF=0.1:n1,t153g,t231c,t254a,n415-6019;LP=4;RP=17;RA=-2.087;ISTP=0;PRIOR=false;SR=11;AF=0.000199681;AC=1	0.000199681	.	.	.	.	.	.
1	188860784	TSD=TTTAGCTATGCAAATTTT;ASSESS=5;INTERNAL=null,null;SVTYPE=LINE1;SVLEN=6019;MEINFO=L1Ta,0,6019,-;DIFF=0.12:n1-5579,a5837c;LP=22;RP=30;RA=-0.447;ISTP=0;PRIOR=false;SR=20	0.00778754	0.0100287	.	.	.	.	.
1	190576261	TSD=AGAAGTAGCAATTTTATA;ASSESS=5;INTERNAL=null,null;SVTYPE=LINE1;SVLEN=6017;MEINFO=L1Ta1d,2,6019,+;DIFF=0.08:n1-2,t231c,t254a,n284,n436-6019;LP=15;RP=9;RA=0.737;ISTP=0;PRIOR=false;SR=11;AF=0.000199681;AC=1	0.000199681	.	.	.	.	.	.
1	191881205	TSD=TAAATGAATGC;ASSESS=5;INTERNAL=null,null;SVTYPE=LINE1;SVLEN=6018;MEINFO=L1Ta1d,1,6019,+;DIFF=0.09:n1,t231c,t254a,n326,n399-417,a423g,g428t,n568-6019;LP=14;RP=12;RA=0.222;ISTP=0;PRIOR=false;SR=14;AF=0.00019976;AC=1	0.00019976	.	.	0.000901172	.	.	.
1	192318950	TSD=AAGAGTTCAAGAG;ASSESS=5;INTERNAL=NM_001039152,INTRONIC;SVTYPE=LINE1;SVLEN=6018;MEINFO=L1Ta1d,1,6019,+;DIFF=0.1:n1,t231c,t254a,n350,a423g,c424t,n501-6019;LP=20;RP=13;RA=0.621;ISTP=0;PRIOR=false;SR=15	0.000199681	0.000716332	.	.	.	.	.
1	192644280	TSD=null;ASSESS=3;INTERNAL=RGS13,INTRONIC;SVTYPE=LINE1;SVLEN=6019;MEINFO=L1Ta1d,0,6019,-;DIFF=0.01:n73-6019;LP=1;RP=5;RA=-2.322;ISTP=-1;PRIOR=false;SR=9	.	.	.	.	.	.	2.01698e-05
1	193580525	TSD=AAGAAAAATAATCTC;ASSESS=5;INTERNAL=null,null;SVTYPE=LINE1;SVLEN=6019;MEINFO=L1Ta1d,0,6019,+;DIFF=0.11:t231c,g352a,n460,c512a,t539a,n558-6019;LP=202;RP=133;RA=0.603;ISTP=0;PRIOR=false;SR=164	0.00579073	0.00787966	.	0.00390273	0.0238095	0.00347222	.
1	193684039	TSD=AGAAAGGCAGTAATAT;ASSESS=5;INTERNAL=LINC01031,TERMINATOR;SVTYPE=LINE1;SVLEN=6019;MEINFO=L1Ta1d,0,6019,+;DIFF=0.1:t231c,t254a,n400-6019;LP=13;RP=16;RA=-0.3;ISTP=0;PRIOR=false;SR=11;AF=0.000150105;AC=1	.	.	.	0.000150105	.	.	.
1	193771612	TSD=AGTGTAGAGTTTT;ASSESS=5;INTERNAL=LINC01031,TERMINATOR;SVTYPE=LINE1;SVLEN=6017;MEINFO=L1Ta,2,6019,-;DIFF=0.1:n1-5683,g5689t,g5823a;LP=27;RP=22;RA=0.295;ISTP=0;PRIOR=false;SR=29;AF=0.00030021;AC=2	.	.	.	0.00030021	.	.	.
1	195710560	TSD=AAGAAAAAATGTA;ASSESS=5;INTERNAL=null,null;SVTYPE=LINE1;SVLEN=6016;MEINFO=L1Ambig,3,6019,+;DIFF=0.11:n1-3,i73g,t231c,c251t,t254a,g352a,n555-6019;LP=20;RP=6;RA=1.737;ISTP=0;PRIOR=false;SR=13;GENE=LOC105371671;AF=0.000199681;AC=1	0.000199681	.	.	.	.	.	.
1	196386725	TSD=TTCTCATTCCTT;ASSESS=5;INTERNAL=NM_198503,INTRONIC;SVTYPE=LINE1;SVLEN=6019;MEINFO=L1Ta1d,0,6019,-;DIFF=0.04:n265-266,n269-272,n275,n280,n282,n284-6019;LP=1;RP=10;RA=-3.322;ISTP=0;PRIOR=false;SR=6	.	.	.	.	.	0.000868056	.
1	197671720	TSD=AGAAAAGGGCATACAT;ASSESS=5;INTERNAL=NM_001300858,INTRONIC;SVTYPE=LINE1;SVLEN=6018;MEINFO=L1Ta1d,1,6019,+;DIFF=0.09:n1,n16,t231c,t254a,a423g,n483-6019;LP=17;RP=10;RA=0.766;ISTP=0;PRIOR=false;SR=19;GENE=DENND1B;AF=0.000199681;AC=1	0.000199681	.	.	.	.	.	.
1	198158115	TSD=CCTCTATTTAGTCTT;ASSESS=5;INTERNAL=NM_133494,INTRONIC;SVTYPE=LINE1;SVLEN=6017;MEINFO=L1Ta1d,2,6019,-;DIFF=0.06:g184c,g210c,t231c,t254a,n322-6019;LP=3;RP=12;RA=-2;ISTP=0;PRIOR=false;SR=9	.	.	.	.	.	0.000868056	.
1	198539262	TSD=CTGACTGACTTTCTT;ASSESS=5;INTERNAL=NM_133326,INTRONIC;SVTYPE=LINE1;SVLEN=6019;MEINFO=L1Ta1d,0,6019,-;DIFF=0.11:n1-2,t231c,t254a,c327t,n405,n447,n455,n478-6019;LP=18;RP=27;RA=-0.585;ISTP=0;PRIOR=false;SR=11;GENE=ATP6V1G3;AF=0.000199681;AC=1	0.000199681	.	.	.	.	.	.
1	198560535	TSD=AAAACTCAGCCAACAGA;ASSESS=5;INTERNAL=null,null;SVTYPE=LINE1;SVLEN=6017;MEINFO=L1Ta1d,2,6019,+;DIFF=0.13:n1-2,t231c,t254a,c327t,n482,n511,n523,n547,n603-6019;LP=16;RP=15;RA=0.093;ISTP=0;PRIOR=false;SR=13;AF=0.000199681;AC=1	0.000199681	.	.	.	.	.	.
1	198727465	TSD=CCAAAAATATTTTTTTT;ASSESS=5;INTERNAL=NM_080921,INTRONIC;SVTYPE=LINE1;SVLEN=6019;MEINFO=L1Ta1d,0,6019,-;DIFF=0.05:t231c,c251t,t254a,n318-6019;LP=2;RP=14;RA=-2.807;ISTP=0;PRIOR=false;SR=6	.	.	.	.	0.00793651	0.000868056	.
1	199018301	TSD=GGGAGATTTTTA;ASSESS=5;INTERNAL=NR_126351,INTRONIC;SVTYPE=LINE1;SVLEN=6019;MEINFO=L1Ta1d,0,6019,-;DIFF=0.09:a45g,a69g,a140g,a168g,a216g,t231c,t254a,a388g,n411,n419,n450,n531,n537,n573-6019;LP=9;RP=36;RA=-2;ISTP=0;PRIOR=false;SR=23	0.000199681	0.000716332	.	.	.	.	.
1	199614562	TSD=TATAAATTATATTTA;ASSESS=5;INTERNAL=null,null;SVTYPE=LINE1;SVLEN=6019;MEINFO=L1Ta1d,0,6019,-;DIFF=0.1:n1-2,t231c,t254a,n450,n496,n569-6019;LP=7;RP=19;RA=-1.441;ISTP=0;PRIOR=false;SR=10;AF=0.000199681;AC=1	0.000199681	.	.	.	.	.	.
1	199780404	TSD=AGAAAACTTGTTT;ASSESS=5;INTERNAL=NR5A2,PROMOTER;SVTYPE=LINE1;SVLEN=6017;MEINFO=L1Ta1d,2,6019,-;DIFF=0.1:n1-2,t231c,t254a,c259t,c327t,n418,g419t,n443-6019;LP=6;RP=10;RA=-0.737;ISTP=0;PRIOR=false;SR=12;AF=0.000150105;AC=1	.	.	.	0.000150105	.	.	.
1	200382109	TSD=null;ASSESS=4;INTERNAL=LINC00862,PROMOTER;SVTYPE=LINE1;SVLEN=6007;MEINFO=L1Ambig,11,6018,-;DIFF=0.05:n1-4289,c4419t,g4426a,n4441-6019;LP=2;RP=4;RA=-1;ISTP=0;PRIOR=false;SR=1;AF=0.00105074;AC=7	.	.	.	0.00105074	.	.	.
1	200432272	TSD=AAAATTAAAAATTA;ASSESS=5;INTERNAL=null,null;SVTYPE=LINE1;SVLEN=6019;MEINFO=L1Ta1d,0,6019,+;DIFF=0.13:g210c,t231c,t254a,a388g,n529-6019;LP=14;RP=15;RA=-0.1;ISTP=0;PRIOR=false;SR=13;GENE=ZNF281;AF=0.000199681;AC=1	0.000199681	.	.	.	.	.	.
1	200720981	TSD=null;ASSESS=1;INTERNAL=CAMSAP2,PROMOTER;SVTYPE=LINE1;SVLEN=6018;MEINFO=L1Ta1d,1,6019,-;DIFF=0.08:n316-6019;LP=6;RP=10;RA=-0.737;ISTP=-1;PRIOR=false;SR=0;AF=0.000150105;AC=1	.	.	.	0.000150105	.	.	.
1	204580791	TSD=null;ASSESS=3;INTERNAL=null,null;SVTYPE=LINE1;SVLEN=6018;MEINFO=L1Ta1d,1,6019,-;DIFF=0.08:n1,t231c,t254a,n334-6019;LP=2;RP=17;RA=-3.087;ISTP=-1;PRIOR=false;SR=9	.	.	.	.	.	0.000868056	.
1	204651015	TSD=AAGATTAGAGAATGTC;ASSESS=5;INTERNAL=NM_201630,INTRONIC;SVTYPE=LINE1;SVLEN=6017;MEINFO=L1Ta1d,2,6019,+;DIFF=0.09:n1-2,t231c,t254a,c327t,n359-6019;LP=14;RP=10;RA=0.485;ISTP=0;PRIOR=false;SR=7	.	0.000716332	.	.	.	.	.
1	204853141	TSD=null;ASSESS=3;INTERNAL=NM_001005388,INTRONIC;SVTYPE=LINE1;SVLEN=6016;MEINFO=L1Ta1d,3,6019,-;DIFF=0.09:n1,n335-6019;LP=8;RP=14;RA=-0.807;ISTP=-1;PRIOR=false;SR=9	.	.	.	.	.	0.000868056	.
1	204853156	TSD=CTGGATGTCATTTCT;ASSESS=5;INTERNAL=NM_001005388,INTRONIC;SVTYPE=LINE1;SVLEN=6017;MEINFO=L1Ta1d,2,6019,-;DIFF=0.11:n1,n355-376,g485t,n529-530,n538,n546,n554,n561,n563,c565a,n567,n586,c590a,n593-6019;LP=82;RP=104;RA=-0.343;ISTP=0;PRIOR=false;SR=85	0.00459265	0.00429799	.	0.00750525	.	.	.
1	204971403	TSD=TTGCATTACTTTTC;ASSESS=5;INTERNAL=NM_001160331,INTRONIC;SVTYPE=LINE1;SVLEN=6019;MEINFO=L1Ta1d,0,6019,-;DIFF=0.1:n1-2,t231c,t254a,n326-456,n465,n607-6019;LP=23;RP=23;RA=0;ISTP=0;PRIOR=false;SR=18;GENE=NFASC;AF=0.000199681;AC=1	0.000199681	.	.	.	.	.	.
1	207302877	TSD=AGAATGTCAATCTGGAG;ASSESS=5;INTERNAL=CD55,PROMOTER;SVTYPE=LINE1;SVLEN=6017;MEINFO=L1Ta1d,2,6019,+;DIFF=0.09:n1-2,t231c,t254a,n355-6019;LP=39;RP=20;RA=0.963;ISTP=0;PRIOR=false;SR=29;AF=0.000450315;AC=3	.	.	.	0.000450315	.	.	.
1	207493765	TSD=null;ASSESS=3;INTERNAL=CR1,PROMOTER;SVTYPE=LINE1;SVLEN=6010;MEINFO=L1Ta1d,8,6018,+;DIFF=0.1:n1-7,c37t,g61a,t231c,t254a,n432-6019;LP=15;RP=11;RA=0.447;ISTP=0;PRIOR=false;SR=9;AF=0.000150105;AC=1	.	.	.	0.000150105	.	.	.
1	208227394	TSD=AAGAAATGGAATCTC;ASSESS=5;INTERNAL=NM_025179,INTRONIC;SVTYPE=LINE1;SVLEN=6019;MEINFO=L1Ta1d,0,6019,+;DIFF=0.09:t231c,t254a,n378-6019;LP=24;RP=13;RA=0.885;ISTP=0;PRIOR=false;SR=24;GENE=PLXNA2;AF=0.000199681;AC=1	0.000199681	.	.	.	.	.	.
1	209577317	TSD=TGTAATTTCT;ASSESS=5;INTERNAL=NM_020439,PROMOTER;SVTYPE=LINE1;SVLEN=6018;MEINFO=L1Ta1d,1,6019,-;DIFF=0.08:n1,t231c,t254a,n409,n411,n450-6019;LP=4;RP=24;RA=-2.585;ISTP=0;PRIOR=false;SR=14;GENE=LOC107985256;AF=0.000199681;AC=1	0.000199681	.	.	.	.	.	.
1	209940325	TSD=TAAAGTGTTTCTT;ASSESS=5;INTERNAL=NR_027459,INTRONIC;SVTYPE=LINE1;SVLEN=6016;MEINFO=L1Ambig,3,6019,-;DIFF=0.09:n1-3,g38a,i72c,g83c,t153c,g219t,t231c,t254a,c295t,g313a,c351g,g352a,n387-475,n533,n555,n572,n626-6019;LP=5;RP=14;RA=-1.485;ISTP=0;PRIOR=false;SR=8;GENE=SYT14;AF=0.000199681;AC=1	0.000199681	.	.	.	.	.	.
1	210849921	TSD=AGAAGGAACAATAAATA;ASSESS=5;INTERNAL=NM_002238,INTRONIC;SVTYPE=LINE1;SVLEN=6019;MEINFO=L1Ta1d,0,6019,+;DIFF=0.09:t231c,t254a,n468-6019;LP=17;RP=3;RA=2.503;ISTP=0;PRIOR=false;SR=5;GENE=KCNH1;AF=0.000199681;AC=1	0.000199681	.	.	.	.	.	.
1	211085370	TSD=AAGAAATTTGAACTTC;ASSESS=5;INTERNAL=NM_002238,INTRONIC;SVTYPE=LINE1;SVLEN=6019;MEINFO=L1Ta1d,0,6019,+;DIFF=0.08:g210c,t231c,g232c,t254a,n367-6019;LP=14;RP=17;RA=-0.28;ISTP=0;PRIOR=false;SR=13;GENE=KCNH1;AF=0.000199681;AC=1	0.000199681	.	.	.	.	.	.
1	211779173	TSD=AAGAAAAATTCTAAGGATG;ASSESS=5;INTERNAL=NM_014873,INTRONIC;SVTYPE=LINE1;SVLEN=6019;MEINFO=L1Ambig,0,6019,+;DIFF=0.11:n1-3,i73g,c115a,g167a,t231c,t254a,c257t,g352a,n403-6019;LP=14;RP=9;RA=0.637;ISTP=0;PRIOR=false;SR=19;GENE=LPGAT1;AF=0.000199681;AC=1	0.000199681	.	.	0.000150105	.	.	.
1	212340300	TSD=null;ASSESS=3;INTERNAL=NM_001199756,INTRONIC;SVTYPE=LINE1;SVLEN=6016;MEINFO=L1Ta1d,3,6019,-;DIFF=0.04:n1-2,t231c,t254a,n288-6019;LP=1;RP=14;RA=-3.807;ISTP=-1;PRIOR=false;SR=10	.	.	.	.	.	0.000868056	.
1	212340317	TSD=TGATACAGCCCTTTTCT;ASSESS=5;INTERNAL=NM_001199756,INTRONIC;SVTYPE=LINE1;SVLEN=6016;MEINFO=L1Ta1d,3,6019,-;DIFF=0.11:n1-2,t231c,t254a,c327t,t535a,n582-6019;LP=15;RP=42;RA=-1.485;ISTP=0;PRIOR=false;SR=19	0.00159744	0.00143266	.	.	.	.	.
1	213335503	TSD=GAGGTCTGT;ASSESS=5;INTERNAL=null,null;SVTYPE=LINE1;SVLEN=6018;MEINFO=L1Ta1d,1,6019,-;DIFF=0.07:t231c,t254a,n573-6019;LP=1;RP=20;RA=-4.322;ISTP=0;PRIOR=false;SR=9;GENE=RPS6KC1;AF=0.000199681;AC=1	0.000199681	.	.	.	.	.	.
1	213357147	TSD=AAAAATCAGATTCC;ASSESS=5;INTERNAL=null,null;SVTYPE=LINE1;SVLEN=6019;MEINFO=L1Ta1d,0,6019,+;DIFF=0.09:t231c,n424-6019;LP=198;RP=116;RA=0.771;ISTP=0;PRIOR=false;SR=147	0.00459265	0.00787966	.	0.0163615	.	0.00347222	.
1	213413789	TSD=AAAAGACC;ASSESS=5;INTERNAL=RPS6KC1,TERMINATOR;SVTYPE=LINE1;SVLEN=6019;MEINFO=L1Ta1d,0,6019,+;DIFF=0.08:n349,n389-6019;LP=14;RP=10;RA=0.485;ISTP=0;PRIOR=false;SR=18;AF=0.000150105;AC=1	.	.	.	0.000150105	.	.	.
1	213522090	TSD=ACAAAATGTATTTCTC;ASSESS=5;INTERNAL=null,null;SVTYPE=LINE1;SVLEN=6018;MEINFO=L1Ta1d,1,6019,+;DIFF=0.09:n1,c144g,t231c,t254a,n490,n496,n502,n516,n520-6019;LP=45;RP=17;RA=1.404;ISTP=0;PRIOR=false;SR=26	.	0.00143266	.	.	.	.	.
1	213973859	TSD=AAGAGTTCTCTTACC;ASSESS=5;INTERNAL=NR_037850,INTRONIC;SVTYPE=LINE1;SVLEN=6019;MEINFO=L1Ta1d,0,6019,+;DIFF=0.09:n1-2,t231c,t254a,c327t,n350,n363-6019;LP=18;RP=3;RA=2.585;ISTP=0;PRIOR=false;SR=10	.	.	.	.	.	0.000868056	.
1	214110948	TSD=CCTTTTTCTCATTTCTT;ASSESS=5;INTERNAL=PROX1,TERMINATOR;SVTYPE=LINE1;SVLEN=6019;MEINFO=L1Ta1d,0,6019,-;DIFF=0.1:t231c,t254a,c324a,n357-6019;LP=51;RP=44;RA=0.213;ISTP=0;PRIOR=false;SR=61;AF=0.00060042;AC=4	.	.	.	0.00060042	.	.	.
1	216274168	TSD=CTTACTCTCTTTTTCTT;ASSESS=5;INTERNAL=USH2A,INTRONIC;SVTYPE=LINE1;SVLEN=6017;MEINFO=L1Ta1d,1,6018,+;DIFF=0.06:n5,n11,t231c,t254a,n288-6019;LP=2;RP=12;RA=-2.585;ISTP=0;PRIOR=false;SR=21;AF=0.000150105;AC=1	.	.	.	0.000150105	.	.	.
1	216866544	TSD=null;ASSESS=3;INTERNAL=NM_001243510,INTRONIC;SVTYPE=LINE1;SVLEN=6015;MEINFO=L1Ta1d,4,6019,-;DIFF=0.11:n1-2,t231c,t254a,n343,n451-6019;LP=17;RP=15;RA=0.181;ISTP=-1;PRIOR=false;SR=5;GENE=ESRRG;AF=0.000199681;AC=1	0.000199681	.	.	0.000150105	.	.	.
1	218306634	TSD=AAGGGATCTT;ASSESS=5;INTERNAL=NM_016052,INTRONIC;SVTYPE=LINE1;SVLEN=6019;MEINFO=L1Ta1d,0,6019,-;DIFF=0.07:g210c,t231c,t254a,a388g,n442-6019;LP=3;RP=18;RA=-2.585;ISTP=0;PRIOR=false;SR=9;GENE=RRP15;AF=0.000199681;AC=1	0.000199681	.	.	.	.	.	.
1	218390601	TSD=AAAATAACACATAC;ASSESS=5;INTERNAL=NM_003238,INTRONIC;SVTYPE=LINE1;SVLEN=6016;MEINFO=L1Ambig,3,6019,+;DIFF=0.1:n1-3,g38a,i72c,g83c,t153c,c205t,g219t,t231c,t254a,g313a,c351g,g352a,g356a,n382-6019;LP=44;RP=23;RA=0.936;ISTP=0;PRIOR=false;SR=35;GENE=TGFB2;AF=0.000399361;AC=2	0.000399361	.	.	0.00135095	.	.	.
1	219370492	TSD=GAAGGTAGAGATA;ASSESS=5;INTERNAL=null,null;SVTYPE=LINE1;SVLEN=6018;MEINFO=L1Ta1d,1,6019,+;DIFF=0.05:n1,t231c,t254a,n333-341,a373g,c418t,a423g,n430,g446a,n491-6019;LP=22;RP=1;RA=4.459;ISTP=0;PRIOR=false;SR=9	.	.	.	.	.	0.000868056	.
1	219680510	TSD=AAAAACAACACCTTATC;ASSESS=5;INTERNAL=null,null;SVTYPE=LINE1;SVLEN=6019;MEINFO=L1Ambig,0,6019,+;DIFF=0.08:n1-687,n740,c834a,n945-1019,n1021,n1023,n1029,n1035,n1039,n1042-1043,n1045,n1055,n1068,n1072,n1077,n1087,n1091,n1135,n1145,n1169-6019;LP=19;RP=9;RA=1.078;ISTP=0;PRIOR=false;SR=9;AF=0.000199681;AC=1	0.000199681	.	.	.	.	.	.
1	219789243	TSD=null;ASSESS=3;INTERNAL=SLC30A10,TERMINATOR;SVTYPE=LINE1;SVLEN=6016;MEINFO=L1Ta,2,6018,-;DIFF=0.07:n1-5524,g5586a,t5628c,n5676-5707,n5725,c5945t;LP=11;RP=42;RA=-1.933;ISTP=-1;PRIOR=false;SR=30;AF=0.000750525;AC=5	.	.	.	0.000750525	.	.	.
1	220115690	TSD=CCCTTTTGTGCTTTTC;ASSESS=5;INTERNAL=NM_018060,INTRONIC;SVTYPE=LINE1;SVLEN=6019;MEINFO=L1Ta1d,0,6019,-;DIFF=0.1:t231c,t254a,n606,n635-6019;LP=14;RP=101;RA=-2.851;ISTP=0;PRIOR=false;SR=62	0.00419329	0.00358166	.	.	0.015873	.	.
1	221909758	TSD=CAGTGTCTGATGATTTT;ASSESS=5;INTERNAL=LINC01655,PROMOTER;SVTYPE=LINE1;SVLEN=6019;MEINFO=L1Ta1d,0,6019,-;DIFF=0.08:t231c,t254a,c269t,n356-6019;LP=30;RP=41;RA=-0.451;ISTP=0;PRIOR=false;SR=44;AF=0.00060042;AC=4	.	.	.	0.00060042	.	.	.
1	222307106	TSD=AAAGAATTGTTCA;ASSESS=5;INTERNAL=null,null;SVTYPE=LINE1;SVLEN=6019;MEINFO=L1Ambig,0,6019,+;DIFF=0.03:n1-2,i73g,c143t,t149g,t153c,n175-6019;LP=12;RP=1;RA=3.585;ISTP=0;PRIOR=false;SR=8	.	.	.	.	.	0.000868056	.
1	222405788	TSD=CCATTATCCATTTTT;ASSESS=5;INTERNAL=null,null;SVTYPE=LINE1;SVLEN=6016;MEINFO=L1Ta,2,6018,+;DIFF=0.12:n1-5575,c5945t;LP=485;RP=643;RA=-0.407;ISTP=0;PRIOR=false;SR=396	0.0367412	0.0372493	0.00044964	0.110627	0.031746	0.0191304	.
1	223652976	TSD=AAAGAAAAATCCA;ASSESS=5;INTERNAL=CAPN8,INTRONIC;SVTYPE=LINE1;SVLEN=6018;MEINFO=L1Ta1d,1,6019,+;DIFF=0.07:n1,t231c,t254a,g256t,n272,n347,n387-6019;LP=9;RP=8;RA=0.17;ISTP=0;PRIOR=false;SR=8;AF=0.000150105;AC=1	.	.	.	0.000150105	.	.	.
1	223891894	TSD=AGAAATTAGGAAATTA;ASSESS=5;INTERNAL=null,null;SVTYPE=LINE1;SVLEN=6018;MEINFO=L1Ta1d,1,6019,+;DIFF=0.14:n1,t231c,t254a,a423g,n525-6019;LP=19;RP=26;RA=-0.453;ISTP=0;PRIOR=false;SR=18;AF=0.000399361;AC=2	0.000399361	.	.	.	.	.	.
1	224533387	TSD=AGAACCCGTCTC;ASSESS=5;INTERNAL=CNIH3,INTRONIC;SVTYPE=LINE1;SVLEN=6019;MEINFO=L1Ta1d,0,6019,+;DIFF=0.05:n1-2,t231c,t254a,n259,n279-281,n362-6019;LP=14;RP=2;RA=2.807;ISTP=0;PRIOR=false;SR=10;AF=0.000150105;AC=1	.	.	.	0.000150105	.	.	.
1	225205884	TSD=AGAAAATATGT;ASSESS=5;INTERNAL=NM_001373,INTRONIC;SVTYPE=LINE1;SVLEN=6010;MEINFO=L1Ta1d,8,6018,-;DIFF=0.11:n1-7,t231c,t254a,c327t,n411,n488-6019;LP=29;RP=33;RA=-0.186;ISTP=0;PRIOR=false;SR=17	0.00259585	0.00143266	0.0022482	0.00135095	0.00793651	0.00607639	.
1	225325485	TSD=null;ASSESS=3;INTERNAL=NM_001373,INTRONIC;SVTYPE=LINE1;SVLEN=6016;MEINFO=L1Ta,2,6018,+;DIFF=0.09:n1-5604,n5608,n5622,t5628c,n5629,n5633,n5636,n5641,n5645,n5652,n5655,n5659,g5660t,n5661-5661,n5665-5666,n5668,n5673,n5675-5676,n5686,n5705,n5711,n5715,n5721-5722,a5725g,n5726-5727,n5730,n5733,c5945t;LP=10;RP=10;RA=0;ISTP=0;PRIOR=false;SR=6;GENE=DNAH14;AF=0.000199681;AC=1	0.000199681	.	.	.	.	.	.
1	227681369	TSD=AAAAAAA;ASSESS=5;INTERNAL=NR_102302,TERMINATOR;SVTYPE=LINE1;SVLEN=6014;MEINFO=L1Ta1d,5,6019,+;DIFF=0.12:n1-5,t231c,t254a,c327t,c359a,n366-391,n403,n412,n416,n421,n426,n429-431,n445-446,n448,n453-455,n466,n472-473,n478,n482,n485,n491,n494,n498-499,n501,n511,n513,n515,n517,n523,n525,n534-535,n541-6019;LP=27;RP=15;RA=0.848;ISTP=0;PRIOR=false;SR=14	.	0.000716332	.	.	.	.	.
1	230105847	TSD=AAGATGGACAACTAGG;ASSESS=5;INTERNAL=NM_004481,INTRONIC;SVTYPE=LINE1;SVLEN=6019;MEINFO=L1Ta1d,0,6019,+;DIFF=0.09:g210c,t231c,t254a,n303,a388g,n454-467,n491,n586,n618-6019;LP=67;RP=35;RA=0.937;ISTP=0;PRIOR=false;SR=46	0.00359425	0.002149	.	0.00270189	.	.	.
1	231744931	TSD=AAAAGAAATGAAAATC;ASSESS=5;INTERNAL=DISC1,INTRONIC;SVTYPE=LINE1;SVLEN=6017;MEINFO=L1Ta1d,2,6019,+;DIFF=0.1:n1-2,c144g,t231c,t254a,n378-6019;LP=12;RP=10;RA=0.263;ISTP=0;PRIOR=false;SR=13;AF=0.000150105;AC=1	.	.	.	0.000150105	.	.	.
1	232179071	TSD=AAAGAAGGGGATGTG;ASSESS=5;INTERNAL=SIPA1L2,TERMINATOR;SVTYPE=LINE1;SVLEN=6019;MEINFO=L1Ambig,0,6019,+;DIFF=0.11:n1-3,i73g,t231c,t254a,t288c,n295,c344a,g352a,g419a,g452t,n473-6019;LP=79;RP=64;RA=0.304;ISTP=0;PRIOR=false;SR=69;AF=0.00090063;AC=6	.	.	.	0.00090063	.	.	.
1	232405262	TSD=AAGAGTTCTCCATCC;ASSESS=5;INTERNAL=SIPA1L2,INTRONIC;SVTYPE=LINE1;SVLEN=6007;MEINFO=L1Ta1d,12,6019,+;DIFF=0.09:n1-12,g210c,t231c,t254a,a388g,n395-503,n505,c506a,n512-512,n515,n526,n542,n553-554,n556,n561,c565a,n579,n581,n584-585,n595-596,n598,n610,n654-6019;LP=14;RP=6;RA=1.222;ISTP=0;PRIOR=false;SR=9;AF=0.000150105;AC=1	.	.	.	0.000150105	.	.	.
1	233667748	TSD=AAAAAAAAAAAAAAAAAA;ASSESS=5;INTERNAL=NM_002245,INTRONIC;SVTYPE=LINE1;SVLEN=6017;MEINFO=L1Ta,1,6018,+;DIFF=0.1:n1-5643,a5647c,n5649,n5651,n5655,n5663-5664,n5668-5669,n5675,n5677;LP=19;RP=27;RA=-0.507;ISTP=0;PRIOR=false;SR=5	0.00139776	0.00143266	.	0.00480336	.	.	.
1	234133245	TSD=AAGATCATTTTTC;ASSESS=5;INTERNAL=NM_173508,INTRONIC;SVTYPE=LINE1;SVLEN=6019;MEINFO=L1Ta1d,0,6019,+;DIFF=0.08:g210c,t231c,g232c,t254a,n408-6019;LP=16;RP=3;RA=2.415;ISTP=0;PRIOR=false;SR=9;GENE=SLC35F3;AF=0.000199681;AC=1	0.000199681	.	.	.	.	.	.
1	234938617	TSD=AGAAAACCTGCTCCC;ASSESS=5;INTERNAL=null,null;SVTYPE=LINE1;SVLEN=6015;MEINFO=L1Ambig,3,6018,+;DIFF=0.11:n1-2,c37t,i73g,t254a,c327t,t405c,g419a,n483-6019;LP=60;RP=46;RA=0.383;ISTP=0;PRIOR=false;SR=19	0.00139776	0.002149	.	0.0030021	.	.	.
1	235222281	TSD=AAATCAAAATTTTT;ASSESS=5;INTERNAL=NM_031371,INTRONIC;SVTYPE=LINE1;SVLEN=6017;MEINFO=L1Ta1d,2,6019,-;DIFF=0.11:n1,c144g,t231c,t254a,n423,n489,n492,n494,n499,n501,n506,c510a,n517,n519-521,n523,n526,c529g,n530,n533-536,n538,n541,n545-546,n551,n554-555,n559-560,n563,n567,n570,n573,n578-6019;LP=10;RP=15;RA=-0.585;ISTP=0;PRIOR=false;SR=16;GENE=ARID4B;AF=0.000199681;AC=1	0.000199681	.	.	.	.	.	.
1	235546819	TSD=GTTATTACTCTTATT;ASSESS=5;INTERNAL=NR_039973,INTRONIC;SVTYPE=LINE1;SVLEN=6019;MEINFO=L1Ta1d,0,6019,-;DIFF=0.09:c144g,t231c,t254a,n408,n511,n523,n608-6019;LP=7;RP=20;RA=-1.515;ISTP=0;PRIOR=false;SR=11;AF=0.000199681;AC=1	0.000199681	.	.	.	.	.	.
1	236040151	TSD=AGAAAGGGTGGAGACAGGA;ASSESS=5;INTERNAL=NID1,INTRONIC;SVTYPE=LINE1;SVLEN=6017;MEINFO=L1Ta1d,2,6019,+;DIFF=0.06:n1-2,t231c,t254a,n310-6019;LP=18;RP=3;RA=2.585;ISTP=0;PRIOR=false;SR=7;AF=0.000150105;AC=1	.	.	.	0.000150105	.	.	.
1	236591333	TSD=AACAAATAGTGACACTC;ASSESS=5;INTERNAL=NM_018072,INTRONIC;SVTYPE=LINE1;SVLEN=6019;MEINFO=L1Ta1d,0,6019,+;DIFF=0.08:t231c,t254a,n407-421,n601,n613-6019;LP=18;RP=1;RA=4.17;ISTP=0;PRIOR=false;SR=10;GENE=HEATR1;AF=0.000199681;AC=1	0.000199681	.	.	.	.	.	.
1	240435369	TSD=CTAGTATCAGAAGCTTTT;ASSESS=5;INTERNAL=FMN2,INTRONIC;SVTYPE=LINE1;SVLEN=6018;MEINFO=L1Ta1d,1,6019,-;DIFF=0.1:n3,t231c,t254a,c324a,n471-6019;LP=31;RP=36;RA=-0.216;ISTP=0;PRIOR=false;SR=26;AF=0.00030021;AC=2	.	.	.	0.00030021	.	.	.
1	241466523	TSD=ATAAAGAAATACCTG;ASSESS=5;INTERNAL=null,null;SVTYPE=LINE1;SVLEN=6019;MEINFO=L1Ta1d,0,6019,+;DIFF=0.1:n460,n523-6019;LP=18;RP=6;RA=1.585;ISTP=0;PRIOR=false;SR=8;AF=0.000199681;AC=1	0.000199681	.	.	0.000450315	.	.	.
1	242311356	TSD=AAGAGCAGTTCA;ASSESS=5;INTERNAL=NM_152666,INTRONIC;SVTYPE=LINE1;SVLEN=6019;MEINFO=L1Ta,0,6019,+;DIFF=0.11:n1-5633,n5989;LP=14;RP=7;RA=1;ISTP=0;PRIOR=false;SR=7;GENE=PLD5;AF=0.000199681;AC=1	0.000199681	.	.	.	.	.	.
1	242938587	TSD=AAAAAAAAAAAAAATT;ASSESS=5;INTERNAL=LINC01347,TERMINATOR;SVTYPE=LINE1;SVLEN=6013;MEINFO=L1Ta,6,6019,+;DIFF=0.1:n1-5574,a5642t,n5704,n5724,t5732a,t5737a,c5752a,t6012g;LP=315;RP=294;RA=0.1;ISTP=0;PRIOR=false;SR=246	.	.	0.0134892	.	.	.	.
1	242983548	TSD=AAGGCCAGAAATTCT;ASSESS=5;INTERNAL=null,null;SVTYPE=LINE1;SVLEN=6015;MEINFO=L1Ta,4,6019,-;DIFF=0.06:n1-5711,n5869,n5901;LP=5;RP=6;RA=-0.263;ISTP=0;PRIOR=false;SR=7;AF=0.000199681;AC=1	0.000199681	.	.	.	.	.	.
1	246474209	TSD=CAGGCATTCAGTTTT;ASSESS=5;INTERNAL=SMYD3,INTRONIC;SVTYPE=LINE1;SVLEN=6017;MEINFO=L1Ta1d,2,6019,-;DIFF=0.07:c37a,t231c,g252c,t254a,g285a,n295-296,n301,n308-6019;LP=3;RP=12;RA=-2;ISTP=0;PRIOR=false;SR=7;AF=0.000150105;AC=1	.	.	.	0.000150105	.	.	.
1	247395297	TSD=T;ASSESS=5;INTERNAL=null,null;SVTYPE=LINE1;SVLEN=6019;MEINFO=L1Ta1d,0,6019,-;DIFF=0.09:n1-2,t231c,t254a,c327t,n446-6019;LP=7;RP=23;RA=-1.716;ISTP=0;PRIOR=false;SR=13;AF=0.000199681;AC=1	0.000199681	.	.	.	.	.	.
1	247907151	TSD=null;ASSESS=3;INTERNAL=null,null;SVTYPE=LINE1;SVLEN=6019;MEINFO=L1Ambig,0,6019,-;DIFF=0.1:n1-3,i73g,t231c,t254a,n379-6019;LP=22;RP=45;RA=-1.032;ISTP=-1;PRIOR=false;SR=14	.	0.00573066	.	.	.	.	.
1	247907160	TSD=TCTTTCTTT;ASSESS=5;INTERNAL=null,null;SVTYPE=LINE1;SVLEN=6019;MEINFO=L1Ambig,0,6019,-;DIFF=0.11:n1-3,i73g,t231c,t254a,n447,n449,g468c,n477-6019;LP=29;RP=82;RA=-1.5;ISTP=0;PRIOR=false;SR=40;AF=0.00239617;AC=12	0.00239617	.	.	0.00240168	.	.	.
2	1376975	TSD=AAAAATTACTTTATAT;ASSESS=5;INTERNAL=NM_018968,TERMINATOR;SVTYPE=LINE1;SVLEN=6018;MEINFO=L1Ta1d,1,6019,+;DIFF=0.09:n1,t231c,t254a,n462-6019;LP=36;RP=9;RA=2;ISTP=0;PRIOR=false;SR=21;AF=0.000399361;AC=2	0.000399361	.	.	.	.	.	.
2	1998407	TSD=AAGAAATACAGGGAG;ASSESS=5;INTERNAL=NM_015025,INTRONIC;SVTYPE=LINE1;SVLEN=6017;MEINFO=L1Ta1d,2,6019,+;DIFF=0.12:n1-2,c164t,t231c,t254a,c327t,g419a,a423g,n497-6019;LP=13;RP=11;RA=0.241;ISTP=0;PRIOR=false;SR=14;GENE=MYT1L;AF=0.000199681;AC=1	0.000199681	.	.	.	.	.	.
2	2512463	TSD=CAGGAAGTATGCACTTT;ASSESS=5;INTERNAL=null,null;SVTYPE=LINE1;SVLEN=6019;MEINFO=L1Ta1d,0,6019,-;DIFF=0.07:c144g,t231c,t254a,n330-6019;LP=5;RP=42;RA=-3.07;ISTP=0;PRIOR=false;SR=43	0.000199681	.	.	0.000450315	.	0.00260417	.
2	4278950	TSD=TAAAAATGCATTCCAG;ASSESS=5;INTERNAL=null,null;SVTYPE=LINE1;SVLEN=6017;MEINFO=L1Ta1d,2,6019,+;DIFF=0.13:n1-2,c115a,t231c,t254a,g328a,n481-6019;LP=11;RP=10;RA=0.138;ISTP=0;PRIOR=false;SR=7;AF=0.000199681;AC=1	0.000199681	.	.	.	.	.	.
2	4846645	TSD=AAAAAGTTAAATGCTGC;ASSESS=5;INTERNAL=LINC01249,PROMOTER;SVTYPE=LINE1;SVLEN=6019;MEINFO=L1Ta1d,0,6019,+;DIFF=0.09:c144g,t231c,t254a,n421,n495-6019;LP=91;RP=44;RA=1.048;ISTP=0;PRIOR=false;SR=82;AF=0.00105074;AC=7	.	.	.	0.00105074	.	.	.
2	7208521	TSD=AAAGAATCTTCTT;ASSESS=5;INTERNAL=null,null;SVTYPE=LINE1;SVLEN=6018;MEINFO=L1Ta1d,1,6019,+;DIFF=0.09:n1,t231c,t254a,n408-6019;LP=16;RP=10;RA=0.678;ISTP=0;PRIOR=false;SR=9;AF=0.000199681;AC=1	0.000199681	.	.	.	.	.	.
2	7256675	TSD=AAAAGTCATTTAATC;ASSESS=5;INTERNAL=null,null;SVTYPE=LINE1;SVLEN=6019;MEINFO=L1Ta1d,0,6019,+;DIFF=0.13:n1-2,t231c,t254a,n453-6019;LP=16;RP=9;RA=0.83;ISTP=0;PRIOR=false;SR=20	0.000399361	0.000716332	.	.	.	.	.
2	8801054	TSD=AAGACTGACTCAT;ASSESS=5;INTERNAL=NM_020738,INTRONIC;SVTYPE=LINE1;SVLEN=6012;MEINFO=L1Ta1d,7,6019,+;DIFF=0.07:n1-7,t231c,t254a,c327t,n456-6019;LP=28;RP=1;RA=4.807;ISTP=0;PRIOR=false;SR=12;GENE=KIDINS220;AF=0.000399361;AC=2	0.000399361	.	.	.	.	.	.
2	9700508	TSD=TAAAATCTCAATGCTGGG;ASSESS=5;INTERNAL=null,null;SVTYPE=LINE1;SVLEN=6017;MEINFO=L1Ta1d,2,6019,+;DIFF=0.09:c144g,t231c,t254a,n497-6019;LP=15;RP=6;RA=1.322;ISTP=0;PRIOR=false;SR=16;AF=0.000199681;AC=1	0.000199681	.	.	.	.	.	.
2	9792984	TSD=AAAAATAACCTGCAGTGG;ASSESS=5;INTERNAL=null,null;SVTYPE=LINE1;SVLEN=6019;MEINFO=L1Ta,0,6019,+;DIFF=0.09:n1-5583,n5734-5761,n5989;LP=40;RP=22;RA=0.862;ISTP=0;PRIOR=false;SR=30;AF=0.000399361;AC=2	0.000399361	.	.	.	.	.	.
2	12421961	TSD=ATCACCAGCTAAATTCT;ASSESS=5;INTERNAL=NR_110196,INTRONIC;SVTYPE=LINE1;SVLEN=6019;MEINFO=L1Ta1d,0,6019,-;DIFF=0.05:n1-2,t231c,t254a,n363-6019;LP=1;RP=20;RA=-4.322;ISTP=0;PRIOR=false;SR=6	.	.	.	.	0.00793651	0.000868056	.
2	13581774	TSD=AAAAAAAAAAAAA;ASSESS=5;INTERNAL=null,null;SVTYPE=LINE1;SVLEN=6005;MEINFO=L1Ambig,13,6018,+;DIFF=0.07:n1-5036,c5093a,n5097,n5102-5162,a5166g,n5180-5183,g5212c,c5214t,a5219g,a5258g,c5262t,g5268a,t5316a,t5325c,g5384a,c5391t,t5399c,t5535g,g5538t,c5590t,n5614-6019;LP=6;RP=13;RA=-1.115;ISTP=0;PRIOR=false;SR=10	.	.	0.0139388	0.081357	0.015873	0.0295139	.
2	14030853	TSD=AAAAGTCAAAGTAGGG;ASSESS=5;INTERNAL=LINC00276,TERMINATOR;SVTYPE=LINE1;SVLEN=6019;MEINFO=L1Ta1d,0,6019,+;DIFF=0.11:t231c,t254a,c324a,n363,n365,n371,n379-381,n410,n441-442,n449-6019;LP=23;RP=21;RA=0.131;ISTP=0;PRIOR=false;SR=23;AF=0.00030021;AC=2	.	.	.	0.00030021	.	.	.
2	14397999	TSD=AATATTATTATTTTTG;ASSESS=5;INTERNAL=NR_103814,INTRONIC;SVTYPE=LINE1;SVLEN=6018;MEINFO=L1Ta1d,1,6019,+;DIFF=0.12:g167a,t231c,t254a,c324a,n444-6019;LP=16;RP=10;RA=0.678;ISTP=0;PRIOR=false;SR=9;GENE=LINC00276;AF=0.000199681;AC=1	0.000199681	.	.	.	.	.	.
2	14650486	TSD=GAAAATGCAGGAAGA;ASSESS=5;INTERNAL=FAM84A,5_UTR;SVTYPE=LINE1;SVLEN=6014;MEINFO=L1Ta,4,6018,-;DIFF=0.1:n1-5707;LP=13;RP=14;RA=-0.107;ISTP=0;PRIOR=false;SR=13;AF=0.000150105;AC=1	.	.	.	0.000150105	.	.	.
2	14772808	TSD=GCCAAGCAGCTTATT;ASSESS=5;INTERNAL=null,null;SVTYPE=LINE1;SVLEN=6018;MEINFO=L1Ta1d,1,6019,-;DIFF=0.1:t231c,t254a,c377a,n380,n389-390,n392,n404,n410,n418,n429-6019;LP=11;RP=18;RA=-0.71;ISTP=0;PRIOR=false;SR=13;AF=0.000199681;AC=1	0.000199681	.	.	.	.	.	.
2	14923602	TSD=AAAGAAAAGGTAGGGGTG;ASSESS=5;INTERNAL=null,null;SVTYPE=LINE1;SVLEN=6019;MEINFO=L1Ta1d,0,6019,+;DIFF=0.06:t231c,t254a,n478-6019;LP=25;RP=1;RA=4.644;ISTP=0;PRIOR=false;SR=14	0.000399361	0.000716332	.	.	.	.	.
2	17473250	TSD=TCCATTCTCCTTCTTTA;ASSESS=5;INTERNAL=RAD51AP2,TERMINATOR;SVTYPE=LINE1;SVLEN=6018;MEINFO=L1Ta1d,1,6019,-;DIFF=0.06:n1-2,t231c,t254a,c327t,n349-6019;LP=7;RP=66;RA=-3.237;ISTP=0;PRIOR=false;SR=47;AF=0.00060042;AC=4	.	.	.	0.00060042	.	.	.
2	17925635	TSD=GGGAAAAGAGCTTTTT;ASSESS=5;INTERNAL=KCNS3,INTRONIC;SVTYPE=LINE1;SVLEN=6019;MEINFO=L1Ta1d,0,6019,-;DIFF=0.09:n1-6,n34,n44,c344t,n362-6019;LP=20;RP=18;RA=0.152;ISTP=0;PRIOR=false;SR=13;AF=0.000150105;AC=1	.	.	.	0.000150105	.	.	.
2	18772556	TSD=AAAGAATGAAGAG;ASSESS=5;INTERNAL=null,null;SVTYPE=LINE1;SVLEN=6018;MEINFO=L1Ta1d,1,6019,+;DIFF=0.08:g210c,t231c,g232c,t254a,n530,n543,n596-6019;LP=23;RP=1;RA=4.524;ISTP=0;PRIOR=false;SR=11	0.000399361	0.000716332	.	.	.	.	.
2	19098428	TSD=AAAAATAAGATATACTC;ASSESS=5;INTERNAL=null,null;SVTYPE=LINE1;SVLEN=6019;MEINFO=L1Ta1d,0,6019,+;DIFF=0.15:n1-2,n25,t231c,t254a,n574,n579,n586,n592-6019;LP=60;RP=36;RA=0.737;ISTP=0;PRIOR=false;SR=61	0.000599042	0.002149	.	0.000750525	.	.	.
2	19189355	TSD=null;ASSESS=3;INTERNAL=null,null;SVTYPE=LINE1;SVLEN=6015;MEINFO=L1Ta1d,4,6019,-;DIFF=0.06:n1-3,t231c,t254a,n385-6019;LP=1;RP=11;RA=-3.459;ISTP=-1;PRIOR=false;SR=4;AF=0.28135;AC=1409	0.28135	.	.	.	.	.	.
2	20601065	TSD=AAGAAAATTATTCTA;ASSESS=5;INTERNAL=NR_046836,PROMOTER;SVTYPE=LINE1;SVLEN=6019;MEINFO=L1Ta1d,0,6019,+;DIFF=0.13:c144g,t231c,t254a,n461-6019;LP=14;RP=10;RA=0.485;ISTP=0;PRIOR=false;SR=13;GENE=HS1BP3;AF=0.000199681;AC=1	0.000199681	.	.	.	.	.	.
2	21310745	TSD=TGTGACATACTTT;ASSESS=5;INTERNAL=null,null;SVTYPE=LINE1;SVLEN=6018;MEINFO=L1Ta,1,6019,-;DIFF=0.08:n1-5588,n5739-5755,n5758,n5808,n5812;LP=20;RP=31;RA=-0.632;ISTP=0;PRIOR=false;SR=12;AF=0.000399361;AC=2	0.000399361	.	.	.	.	.	.
2	21462103	TSD=TAGTAGAGATAATTTTC;ASSESS=5;INTERNAL=LINC01822,TERMINATOR;SVTYPE=LINE1;SVLEN=6013;MEINFO=L1Ta,5,6018,-;DIFF=0.11:n1-5569,t5628c,c5945t;LP=7;RP=12;RA=-0.778;ISTP=0;PRIOR=false;SR=7;AF=0.000150105;AC=1	.	.	.	0.000150105	.	.	.
2	22518043	TSD=GATAAAATGACTTTA;ASSESS=5;INTERNAL=LINC01884,PROMOTER;SVTYPE=LINE1;SVLEN=6018;MEINFO=L1Ta1d,1,6019,-;DIFF=0.1:g167a,t231c,t254a,c324a,n404-6019;LP=13;RP=17;RA=-0.387;ISTP=0;PRIOR=false;SR=14;AF=0.000150105;AC=1	.	.	.	0.000150105	.	.	.
2	22968144	TSD=GAGACTGGGTAATTTAT;ASSESS=5;INTERNAL=null,null;SVTYPE=LINE1;SVLEN=6016;MEINFO=L1Ta1d,3,6019,-;DIFF=0.1:n1-2,t231c,t254a,c255t,c363t,n387-6019;LP=8294;RP=12895;RA=-0.637;ISTP=0;PRIOR=false;SR=13035	0.548123	0.517192	0.434353	0.395077	0.587302	0.507813	.
2	28283793	TSD=TCAGTATTGATATTCTT;ASSESS=5;INTERNAL=NM_199191,INTRONIC;SVTYPE=LINE1;SVLEN=6018;MEINFO=L1Ambig,1,6019,-;DIFF=0.1:n1-3,i73g,c115a,c143t,g167a,t231c,t254a,c257t,g352a,n397-6019;LP=26;RP=29;RA=-0.158;ISTP=0;PRIOR=false;SR=30;GENE=BRE;AF=0.000399361;AC=2	0.000399361	.	.	.	.	.	.
2	28741645	TSD=AAGACTTTGCCTG;ASSESS=5;INTERNAL=null,null;SVTYPE=LINE1;SVLEN=6019;MEINFO=L1Ta1d,0,6019,+;DIFF=0.09:n1-2,t231c,t254a,n475-6019;LP=19;RP=9;RA=1.078;ISTP=0;PRIOR=false;SR=12;GENE=LOC100505774;AF=0.000599042;AC=3	0.000599042	.	.	.	.	.	.
2	29315190	TSD=TAAATATTCATG;ASSESS=5;INTERNAL=NM_004304,INTRONIC;SVTYPE=LINE1;SVLEN=6018;MEINFO=L1Ta1d,1,6019,+;DIFF=0.08:n1-2,t25c,t231c,t254a,n292-327,g520a,n526-6019;LP=177;RP=73;RA=1.278;ISTP=0;PRIOR=false;SR=119	0.00479233	0.00644699	.	0.00765536	.	.	.
2	29422300	TSD=CCTGACTTTCTT;ASSESS=5;INTERNAL=NM_004304,INTRONIC;SVTYPE=LINE1;SVLEN=6017;MEINFO=L1Ambig,2,6019,-;DIFF=0.1:n1-2,g70a,i73g,t149g,t153c,g161a,n222,t231c,c251t,t254a,g256a,g352a,a423g,c463a,c491g,g497c,n575-6019;LP=309;RP=533;RA=-0.787;ISTP=0;PRIOR=false;SR=435	0.0169932	0.0200573	.	0.0668675	0.00793651	0.00520833	.
2	29446703	TSD=GGAATTAAGGCTTTTTG;ASSESS=5;INTERNAL=NM_004304,INTRONIC;SVTYPE=LINE1;SVLEN=6019;MEINFO=L1Ta1d,0,6019,-;DIFF=0.11:t151a,t231c,t254a,c324a,a331c,n387,n405-6019;LP=19;RP=20;RA=-0.074;ISTP=0;PRIOR=false;SR=16;GENE=ALK;AF=0.000199681;AC=1	0.000199681	.	.	.	.	.	.
2	30711281	TSD=CTAACTTTTGTATTTTT;ASSESS=5;INTERNAL=null,null;SVTYPE=LINE1;SVLEN=6017;MEINFO=L1Ta1d,2,6019,-;DIFF=0.1:n1-2,t231c,t254a,n447-6019;LP=9;RP=25;RA=-1.474;ISTP=0;PRIOR=false;SR=10;GENE=CAPN13;AF=0.000199681;AC=1	0.000199681	.	.	.	.	.	.
2	31463780	TSD=AAAAGACCATTCAGG;ASSESS=5;INTERNAL=null,null;SVTYPE=LINE1;SVLEN=6017;MEINFO=L1Ta1d,2,6019,+;DIFF=0.09:t231c,t254a,a423g,n427-6019;LP=21;RP=5;RA=2.07;ISTP=0;PRIOR=false;SR=13;AF=0.000199681;AC=1	0.000199681	.	.	.	.	.	.
2	31668642	TSD=AGGTAATCTTCCTTCT;ASSESS=5;INTERNAL=null,null;SVTYPE=LINE1;SVLEN=6019;MEINFO=L1Ta1d,0,6019,-;DIFF=0.09:g167a,t231c,t254a,c324a,n348-355,n383,n506-6019;LP=10;RP=12;RA=-0.263;ISTP=0;PRIOR=false;SR=13	0.000199681	0.000716332	.	.	.	0.000868056	.
2	32858705	TSD=TCCGGAATTTATTCCTTCT;ASSESS=5;INTERNAL=NR_027098,INTRONIC;SVTYPE=LINE1;SVLEN=6018;MEINFO=L1Ta1d,1,6019,-;DIFF=0.1:n1,t231c,t254a,n463-6019;LP=20;RP=56;RA=-1.485;ISTP=0;PRIOR=false;SR=41;GENE=LINC00486;AF=0.000599042;AC=3	0.000599042	.	.	.	.	.	.
2	32897033	TSD=TCTCAGGTATTCTGTT;ASSESS=5;INTERNAL=NR_027100,INTRONIC;SVTYPE=LINE1;SVLEN=6017;MEINFO=L1Ta1d,2,6019,-;DIFF=0.06:n1-2,t231c,t254a,n335-6019;LP=3;RP=11;RA=-1.874;ISTP=0;PRIOR=false;SR=10;GENE=LINC00486;AF=0.000199681;AC=1	0.000199681	.	.	.	.	.	.
2	33301590	TSD=GAGGGCTCTTTTC;ASSESS=5;INTERNAL=NM_000627,EXON_18;SVTYPE=LINE1;SVLEN=6017;MEINFO=L1Ta1d,2,6019,-;DIFF=0.12:n1,a140g,t231c,t254a,a388g,n515-6019;LP=12;RP=22;RA=-0.874;ISTP=0;PRIOR=false;SR=16;GENE=LTBP1;AF=0.000199681;AC=1	0.000199681	.	.	.	.	.	.
2	33355538	TSD=TATTTTTTCAAATATTTTTG;ASSESS=5;INTERNAL=LTBP1,INTRONIC;SVTYPE=LINE1;SVLEN=6018;MEINFO=L1Ta1d,1,6019,-;DIFF=0.08:n1-2,t231c,t254a,n270-313,n465-6019;LP=12;RP=10;RA=0.263;ISTP=0;PRIOR=false;SR=11;AF=0.000150105;AC=1	.	.	.	0.000150105	.	.	.
2	34154438	TSD=AAGATACATACTTAC;ASSESS=5;INTERNAL=LINC01317,INTRONIC;SVTYPE=LINE1;SVLEN=6019;MEINFO=L1Ta1d,0,6019,+;DIFF=0.09:n1-2,t231c,t254a,c327t,c351a,g352a,c363t,a373g,c424t,n452-6019;LP=18;RP=11;RA=0.71;ISTP=0;PRIOR=false;SR=11;AF=0.000150105;AC=1	.	.	.	0.000150105	.	.	.
2	34277080	TSD=AAAAGTAACCCCAAATC;ASSESS=5;INTERNAL=NR_126403,INTRONIC;SVTYPE=LINE1;SVLEN=6018;MEINFO=L1Ta1d,1,6019,+;DIFF=0.1:n1-3,t231c,t254a,n471-6019;LP=41;RP=19;RA=1.11;ISTP=0;PRIOR=false;SR=29	.	0.00143266	.	.	.	.	.
2	34562581	TSD=AGAAGATCAATTTAA;ASSESS=5;INTERNAL=null,null;SVTYPE=LINE1;SVLEN=6017;MEINFO=L1Ta1d,2,6019,+;DIFF=0.06:n1-2,t231c,t254a,c327t,n363-6019;LP=37;RP=1;RA=5.209;ISTP=0;PRIOR=false;SR=20	.	.	.	0.000150105	.	0.00173611	.
2	35547893	TSD=null;ASSESS=4;INTERNAL=null,null;SVTYPE=LINE1;SVLEN=6008;MEINFO=L1Ambig,10,6018,-;DIFF=0.1:n1-5528,c5590t,a5712g,n5736,n5766,n5773-5774,n5781,n5808-5809,n5811,n5826,n5829,a5837c,n5874,n5880,n5887,n5901-5930;LP=11;RP=20;RA=-0.862;ISTP=0;PRIOR=false;SR=6;AF=0.000199681;AC=1	0.000199681	.	.	.	.	.	.
2	35654275	TSD=null;ASSESS=3;INTERNAL=null,null;SVTYPE=LINE1;SVLEN=6011;MEINFO=L1Ambig,7,6018,+;DIFF=0.09:n1-6,g67t,i73g,t78c,g165t,t231c,c236g,t254a,n315-6019;LP=330;RP=126;RA=1.389;ISTP=0;PRIOR=false;SR=16	.	.	.	.	0.134921	.	.
2	35654288	TSD=AAAAAAAAAAAAA;ASSESS=5;INTERNAL=null,null;SVTYPE=LINE1;SVLEN=6011;MEINFO=L1Ta,7,6018,-;DIFF=0.11:n1-5602,n5604,n5625,n5639,n5808,n5821,g5861t,d5867,n5869,n5873,n6019-6019;LP=5326;RP=3232;RA=0.721;ISTP=0;PRIOR=false;SR=1814	0.199081	0.191977	.	.	.	.	.
2	35654291	TSD=AAAAAAAAAAAAAAAAAAAAA;ASSESS=5;INTERNAL=null,null;SVTYPE=LINE1;SVLEN=6011;MEINFO=L1Ambig,7,6018,-;DIFF=0.08:n1-6,g67t,i73g,t78c,g165t,t231c,c236g,t254a,n319-6019;LP=1455;RP=387;RA=1.911;ISTP=0;PRIOR=false;SR=180	.	.	0.0292266	0.244071	.	0.143478	.
2	36343116	TSD=TGCACAGTTCTTTTTTT;ASSESS=5;INTERNAL=null,null;SVTYPE=LINE1;SVLEN=6016;MEINFO=L1Ta1d,2,6018,-;DIFF=0.1:n1,n415-6019;LP=1300;RP=1562;RA=-0.265;ISTP=0;PRIOR=false;SR=596	0.189497	0.186246	0.465378	0.134494	0.404762	0.378472	.
2	36392572	TSD=AAAACATAATTTGC;ASSESS=5;INTERNAL=NM_016441,INTRONIC;SVTYPE=LINE1;SVLEN=6017;MEINFO=L1Ta1d,2,6019,+;DIFF=0.13:n1-2,t231c,t254a,n479-6019;LP=17;RP=14;RA=0.28;ISTP=0;PRIOR=false;SR=15	0.000199681	0.000716332	.	0.000150105	.	.	.
2	36607071	TSD=TGAGTAATTTATAAAGAAATTGA;ASSESS=5;INTERNAL=NM_001042548,PROMOTER;SVTYPE=LINE1;SVLEN=6017;MEINFO=L1Ta1d,2,6019,+;DIFF=0.07:n1-2,n4,n11,t231c,t254a,n318-6019;LP=13;RP=1;RA=3.7;ISTP=0;PRIOR=false;SR=13	0.000199681	.	.	0.00060042	0.00793651	0.000868056	.
2	37469405	TSD=CAAGAATGTAATTTT;ASSESS=5;INTERNAL=QPCT,TERMINATOR;SVTYPE=LINE1;SVLEN=6013;MEINFO=L1Ta1d,6,6019,-;DIFF=0.11:n1-4,t231c,t254a,c327t,n411-6019;LP=20;RP=17;RA=0.234;ISTP=0;PRIOR=false;SR=23;AF=0.000150105;AC=1	.	.	.	0.000150105	.	.	.
2	38840573	TSD=AGGACTTTTGTTTTTTTT;ASSESS=5;INTERNAL=DHX57,INTRONIC;SVTYPE=LINE1;SVLEN=6018;MEINFO=L1Ta1d,1,6019,-;DIFF=0.1:t231c,t254a,n370-6019;LP=28;RP=29;RA=-0.051;ISTP=0;PRIOR=false;SR=30;AF=0.00030021;AC=2	.	.	.	0.00030021	.	.	.
2	39024765	TSD=TAAAAACCAAAGCACT;ASSESS=5;INTERNAL=NM_005633,INTRONIC;SVTYPE=LINE1;SVLEN=6018;MEINFO=L1Ta1d,1,6019,+;DIFF=0.1:n1,t231c,t254a,g352a,n412-6019;LP=20;RP=10;RA=1;ISTP=0;PRIOR=false;SR=9;GENE=SOS1;AF=0.000199681;AC=1	0.000199681	.	.	.	.	.	.
2	39298036	TSD=GCATGTACAGATTTTTA;ASSESS=5;INTERNAL=NM_003618,INTRONIC;SVTYPE=LINE1;SVLEN=6019;MEINFO=L1Ambig,0,6019,-;DIFF=0.08:n1-3,i73g,g163c,g212a,t231c,t254a,g352a,c418t,g446a,n488-6019;LP=2;RP=19;RA=-3.248;ISTP=0;PRIOR=false;SR=9;GENE=MAP4K3;AF=0.000199681;AC=1	0.000199681	.	.	.	.	.	.
2	39349293	TSD=AAAAATTACTAATAAGG;ASSESS=5;INTERNAL=MAP4K3,INTRONIC;SVTYPE=LINE1;SVLEN=6019;MEINFO=L1Ta,0,6019,+;DIFF=0.11:n1-5522,n5674-5715,c5780a,c5785a,c5790a;LP=15;RP=6;RA=1.322;ISTP=0;PRIOR=false;SR=13;AF=0.000150105;AC=1	.	.	.	0.000150105	.	.	.
2	39664334	TSD=GAAAATAAATCCC;ASSESS=5;INTERNAL=NM_001167959,PROMOTER;SVTYPE=LINE1;SVLEN=6019;MEINFO=L1Ta,0,6019,+;DIFF=0.1:n1-5485,n5865,g5919t;LP=15;RP=16;RA=-0.093;ISTP=0;PRIOR=false;SR=11;AF=0.000199681;AC=1	0.000199681	.	.	.	.	.	.
2	39782869	TSD=AAAGAAATGCCTGAGA;ASSESS=5;INTERNAL=THUMPD2,PROMOTER;SVTYPE=LINE1;SVLEN=6018;MEINFO=L1Ta1d,1,6019,+;DIFF=0.05:n1,t231c,t254a,n354-6019;LP=12;RP=1;RA=3.585;ISTP=0;PRIOR=false;SR=5;AF=0.000150105;AC=1	.	.	.	0.000150105	.	.	.
2	40164020	TSD=GAAAAGTAAGCAGGTA;ASSESS=5;INTERNAL=NM_001112802,INTRONIC;SVTYPE=LINE1;SVLEN=6019;MEINFO=L1Ta,0,6019,+;DIFF=0.07:n1-5707,n5745,n5776,n5794,n5807,n5970-5973;LP=16;RP=5;RA=1.678;ISTP=0;PRIOR=false;SR=11;GENE=SLC8A1-AS1;AF=0.000199681;AC=1	0.000199681	.	.	.	.	.	.
2	41278073	TSD=AAACAAAATTACC;ASSESS=5;INTERNAL=null,null;SVTYPE=LINE1;SVLEN=6019;MEINFO=L1Ta1d,0,6019,+;DIFF=0.1:n1-2,t231c,t254a,c317a,n324-6019;LP=91;RP=58;RA=0.65;ISTP=0;PRIOR=false;SR=60;AF=0.000998403;AC=5	0.000998403	.	.	.	.	.	.
2	41642603	TSD=AATATTTGAATAAT;ASSESS=5;INTERNAL=LINC01913,PROMOTER;SVTYPE=LINE1;SVLEN=6019;MEINFO=L1Ambig,0,6019,+;DIFF=0.08:i73g,t231c,c251t,t254a,g352a,n364-6019;LP=26;RP=12;RA=1.115;ISTP=0;PRIOR=false;SR=15;AF=0.00030021;AC=2	.	.	.	0.00030021	.	.	.
2	41652038	TSD=AAGAAAAAGGTAG;ASSESS=5;INTERNAL=null,null;SVTYPE=LINE1;SVLEN=6018;MEINFO=L1Ta1d,1,6019,+;DIFF=0.11:n1,t231c,t254a,n540-6019;LP=18;RP=6;RA=1.585;ISTP=0;PRIOR=false;SR=6;AF=0.000199681;AC=1	0.000199681	.	.	.	.	.	.
2	41686521	TSD=GTGTGTGTGTGTGTGTGTGTGTGTGT;ASSESS=5;INTERNAL=null,null;SVTYPE=LINE1;SVLEN=6016;MEINFO=L1Ta1d,2,6018,-;DIFF=0.05:n1,t231c,t254a,n329-6019;LP=1;RP=22;RA=-4.459;ISTP=0;PRIOR=false;SR=5	.	.	.	.	0.00793651	.	.
2	42721712	TSD=AAAAGATATTTAGG;ASSESS=5;INTERNAL=MTA3,INTRONIC;SVTYPE=LINE1;SVLEN=6019;MEINFO=L1Ta1d,0,6019,+;DIFF=0.1:t231c,t254a,n317,c324a,n417-6019;LP=46;RP=21;RA=1.131;ISTP=0;PRIOR=false;SR=27;AF=0.000450315;AC=3	.	.	.	0.000450315	.	.	.
2	42864909	TSD=AACTGATAATGTTT;ASSESS=5;INTERNAL=null,null;SVTYPE=LINE1;SVLEN=6012;MEINFO=L1Ta1d,7,6019,-;DIFF=0.1:n1-7,t231c,t254a,c327t,n432-482,n587,n633-6019;LP=10;RP=18;RA=-0.848;ISTP=0;PRIOR=false;SR=17;AF=0.000199681;AC=1	0.000199681	.	.	.	.	.	.
2	43244668	TSD=GCATTTGGCATTCTT;ASSESS=5;INTERNAL=NR_073394,INTRONIC;SVTYPE=LINE1;SVLEN=6018;MEINFO=L1Ta1d,1,6019,-;DIFF=0.12:n3,n503-6019;LP=19;RP=19;RA=0;ISTP=0;PRIOR=false;SR=16;GENE=THADA;AF=0.000199681;AC=1	0.000199681	.	.	.	.	.	.
2	43426143	TSD=TTAAATTTTCTA;ASSESS=5;INTERNAL=NR_073394,INTRONIC;SVTYPE=LINE1;SVLEN=6019;MEINFO=L1Ambig,0,6019,+;DIFF=0.14:n1-3,i73g,c115a,c143t,g167a,t231c,t254a,c257t,n330,g352a,n568-6019;LP=20;RP=21;RA=-0.07;ISTP=0;PRIOR=false;SR=15	0.000199681	0.000716332	.	.	.	.	.
2	45213823	TSD=AAAATATTAGCTCTGG;ASSESS=5;INTERNAL=NR_033831,INTRONIC;SVTYPE=LINE1;SVLEN=6018;MEINFO=L1Ambig,1,6019,+;DIFF=0.05:n1-3,i73g,c115a,c143t,g167a,t231c,t254a,c257t,n287,n315-6019;LP=14;RP=1;RA=3.807;ISTP=0;PRIOR=false;SR=11	.	.	.	.	.	0.000868056	.
2	47989706	TSD=GAATTTCTGTTTTCTTT;ASSESS=5;INTERNAL=FBXO11,PROMOTER;SVTYPE=LINE1;SVLEN=6018;MEINFO=L1Ta1d,1,6019,-;DIFF=0.09:n1-2,t231c,t254a,n347-6019;LP=20;RP=21;RA=-0.07;ISTP=0;PRIOR=false;SR=36;AF=0.00030021;AC=2	.	.	.	0.00030021	.	.	.
2	48244204	TSD=null;ASSESS=4;INTERNAL=FOXN2,PROMOTER;SVTYPE=LINE1;SVLEN=6019;MEINFO=L1Ta1d,0,6019,+;DIFF=0.07:n386-6019;LP=29;RP=13;RA=1.158;ISTP=-1;PRIOR=false;SR=15;AF=0.00105074;AC=7	.	.	.	0.00105074	.	.	.
2	48450122	TSD=GAAAAAAAGCCCAAGTT;ASSESS=5;INTERNAL=PPP1R21,INTRONIC;SVTYPE=LINE1;SVLEN=6019;MEINFO=L1Ta1d,0,6019,+;DIFF=0.09:g210c,t231c,t254a,n351-6019;LP=32;RP=37;RA=-0.209;ISTP=0;PRIOR=false;SR=49;AF=0.00090063;AC=6	.	.	.	0.00090063	.	.	.
2	48610844	TSD=AAAGAATCATTCAC;ASSESS=5;INTERNAL=NM_001198594,INTRONIC;SVTYPE=LINE1;SVLEN=6010;MEINFO=L1Ta1d,8,6018,+;DIFF=0.11:n1-7,t231c,t254a,c327t,n406-6019;LP=18;RP=11;RA=0.71;ISTP=0;PRIOR=false;SR=15;GENE=STON1-GTF2A1L;AF=0.000199681;AC=1	0.000199681	.	.	.	.	.	.
2	50217939	TSD=TAAAAGGCACATAATT;ASSESS=5;INTERNAL=NRXN1,INTRONIC;SVTYPE=LINE1;SVLEN=6019;MEINFO=L1Ta1d,0,6019,+;DIFF=0.1:n1-2,t231c,t254a,n421-6019;LP=22;RP=4;RA=2.459;ISTP=0;PRIOR=false;SR=13;AF=0.000150105;AC=1	.	.	.	0.000150105	.	.	.
2	50321913	TSD=ATCTCATTTAATTTTT;ASSESS=5;INTERNAL=NM_001135659,INTRONIC;SVTYPE=LINE1;SVLEN=6018;MEINFO=L1Ambig,1,6019,-;DIFF=0.1:n1-3,i73g,c115a,g167a,t231c,t254a,c257t,g352a,n438-6019;LP=11;RP=15;RA=-0.447;ISTP=0;PRIOR=false;SR=13;GENE=NRXN1;AF=0.000199681;AC=1	0.000199681	.	.	.	.	.	.
2	51708918	TSD=TAGCAACAAGTGTTTTT;ASSESS=5;INTERNAL=null,null;SVTYPE=LINE1;SVLEN=6004;MEINFO=L1Ta1d,15,6019,-;DIFF=0.09:n1-13,t231c,t254a,c327t,n415-6019;LP=50;RP=92;RA=-0.88;ISTP=0;PRIOR=false;SR=55;GENE=LOC730100;AF=0.000798722;AC=4	0.000798722	.	.	.	.	.	.
2	52565187	TSD=AAGAATATTCAGGA;ASSESS=5;INTERNAL=MIR4431,TERMINATOR;SVTYPE=LINE1;SVLEN=6019;MEINFO=L1Ta1d,0,6019,+;DIFF=0.1:t231c,t254a,c324a,n411,n418,n421,n424,n429,n491-6019;LP=11;RP=6;RA=0.874;ISTP=0;PRIOR=false;SR=10;AF=0.000150105;AC=1	.	.	.	0.000150105	.	.	.
2	52985972	TSD=GAAATGTCATGTT;ASSESS=5;INTERNAL=null,null;SVTYPE=LINE1;SVLEN=6018;MEINFO=L1Ta1d,1,6019,+;DIFF=0.09:n1,t231c,t254a,n390-401,n469,n537,n552-6019;LP=10;RP=12;RA=-0.263;ISTP=0;PRIOR=false;SR=10;AF=0.000199681;AC=1	0.000199681	.	.	.	.	.	.
2	53691588	TSD=null;ASSESS=3;INTERNAL=NM_001164165,INTRONIC;SVTYPE=LINE1;SVLEN=6014;MEINFO=L1Ta,4,6018,+;DIFF=0.06:n1-5596,n5736,n5747-5781,n5788,n5791,n5913;LP=21;RP=6;RA=1.807;ISTP=0;PRIOR=false;SR=4	.	0.000716332	.	.	.	.	.
2	55483444	TSD=CTTTTTGCCAATTTT;ASSESS=5;INTERNAL=null,null;SVTYPE=LINE1;SVLEN=6017;MEINFO=L1Ta1d,1,6018,-;DIFF=0.06:t231c,t254a,c324a,n330-406,n411,n452,n459,n516,c529a,n557-6019;LP=5;RP=12;RA=-1.263;ISTP=0;PRIOR=false;SR=2;AF=0.000199681;AC=1	0.000199681	.	.	.	.	.	.
2	55767347	TSD=TTTCTAACATTATTTTT;ASSESS=5;INTERNAL=PNPT1,PROMOTER;SVTYPE=LINE1;SVLEN=6017;MEINFO=L1Ambig,1,6018,+;DIFF=0.09:i73g,t82a,c164a,t231c,t254a,c255g,g352a,n374-488,n640-6019;LP=26;RP=25;RA=0.057;ISTP=0;PRIOR=false;SR=25;AF=0.00030021;AC=2	.	.	.	0.00030021	.	.	.
2	56130244	TSD=CATAGAGTTGT;ASSESS=5;INTERNAL=null,null;SVTYPE=LINE1;SVLEN=6014;MEINFO=L1Ta1d,5,6019,-;DIFF=0.12:n1-3,c101t,t231c,t254a,n317,c327t,n383,n387,n391,n473-593,n606,c649g,c651g,n675-678,n748-6019;LP=9;RP=19;RA=-1.078;ISTP=0;PRIOR=false;SR=16;GENE=LOC105374690;AF=0.000199681;AC=1	0.000199681	.	.	.	.	.	.
2	57200326	TSD=GACTCCATTTCTTT;ASSESS=5;INTERNAL=null,null;SVTYPE=LINE1;SVLEN=6017;MEINFO=L1Ta1d,2,6019,-;DIFF=0.12:n1-26,t231c,t254a,c327t,n528-6019;LP=14;RP=25;RA=-0.837;ISTP=0;PRIOR=false;SR=19;AF=0.000199681;AC=1	0.000199681	.	.	.	.	.	.
2	57651248	TSD=AAGACATATGTGG;ASSESS=5;INTERNAL=VRK2,PROMOTER;SVTYPE=LINE1;SVLEN=6016;MEINFO=L1Ta1d,3,6019,+;DIFF=0.11:n1,n413-6019;LP=11;RP=11;RA=0;ISTP=0;PRIOR=false;SR=14;AF=0.000150105;AC=1	.	.	.	0.000150105	.	.	.
2	58009381	TSD=CCTCTTCTACTTTCTT;ASSESS=5;INTERNAL=NM_001288837,INTRONIC;SVTYPE=LINE1;SVLEN=6017;MEINFO=L1Ta,2,6019,-;DIFF=0.12:n1-5598,n5602,n5605,n5609,g5719c,g5740t,n5769;LP=9;RP=13;RA=-0.531;ISTP=0;PRIOR=false;SR=16;GENE=VRK2;AF=0.000199681;AC=1	0.000199681	.	.	.	.	.	.
2	58458739	TSD=AAAAAATGAATTATT;ASSESS=5;INTERNAL=LINC01122,PROMOTER;SVTYPE=LINE1;SVLEN=6019;MEINFO=L1Ta,0,6019,+;DIFF=0.1:n1-5464,n5616-5674,c5945t;LP=48;RP=44;RA=0.126;ISTP=0;PRIOR=false;SR=54;AF=0.000450315;AC=3	.	.	.	0.000450315	.	.	.
2	58603369	TSD=null;ASSESS=4;INTERNAL=NR_033873,INTRONIC;SVTYPE=LINE1;SVLEN=6016;MEINFO=L1Ta1d,3,6019,+;DIFF=0.07:n1-3,t231c,t254a,n572-6019;LP=19;RP=1;RA=4.248;ISTP=-1;PRIOR=false;SR=4;GENE=LINC01122;AF=0.000199681;AC=1	0.000199681	.	.	.	.	.	.
2	59028704	TSD=AAGAGCTAAACCTT;ASSESS=5;INTERNAL=NR_033873,INTRONIC;SVTYPE=LINE1;SVLEN=6019;MEINFO=L1Ta1d,0,6019,+;DIFF=0.09:g210c,t231c,t254a,a388g,n425-6019;LP=28;RP=19;RA=0.559;ISTP=0;PRIOR=false;SR=16;GENE=LINC01122;AF=0.000399361;AC=2	0.000399361	.	.	0.00225158	.	.	.
2	59621078	TSD=GAAAAATCAAATGAAG;ASSESS=5;INTERNAL=null,null;SVTYPE=LINE1;SVLEN=6017;MEINFO=L1Ta1d,2,6019,+;DIFF=0.11:n1-2,t231c,t254a,c327t,n488-6019;LP=25;RP=8;RA=1.644;ISTP=0;PRIOR=false;SR=13;AF=0.000199681;AC=1	0.000199681	.	.	.	.	.	.
2	59838120	TSD=AAGAGTTGCCAGC;ASSESS=5;INTERNAL=MIR4432HG,TERMINATOR;SVTYPE=LINE1;SVLEN=6019;MEINFO=L1Ta1d,0,6019,+;DIFF=0.1:n223-246,n253,n274,c283t,n373-6019;LP=20;RP=25;RA=-0.322;ISTP=0;PRIOR=false;SR=21	.	.	0.000899281	.	.	.	.
2	59901846	TSD=AAAGAAAAGGCAACTTG;ASSESS=5;INTERNAL=null,null;SVTYPE=LINE1;SVLEN=6019;MEINFO=L1Ta1d,0,6019,+;DIFF=0.06:n279,n325-6019;LP=7;RP=4;RA=0.807;ISTP=0;PRIOR=false;SR=10	.	.	.	0.000150105	.	0.000868056	.
2	59905092	TSD=null;ASSESS=4;INTERNAL=null,null;SVTYPE=LINE1;SVLEN=6015;MEINFO=L1Ta1d,3,6018,-;DIFF=0.09:n1-2,t231c,t254a,c327t,n333-550,n575,n577,c649g,c651g,n675-678,n705-6019;LP=7;RP=10;RA=-0.515;ISTP=0;PRIOR=false;SR=6;AF=0.000199681;AC=1	0.000199681	.	.	.	.	.	.
2	60165970	TSD=AGAAAAATATGCTTCA;ASSESS=5;INTERNAL=null,null;SVTYPE=LINE1;SVLEN=6019;MEINFO=L1Ta1d,0,6019,+;DIFF=0.1:n425-6019;LP=39;RP=18;RA=1.115;ISTP=0;PRIOR=false;SR=31	0.000399361	0.00143266	.	.	.	.	.
2	60368938	TSD=null;ASSESS=4;INTERNAL=null,null;SVTYPE=LINE1;SVLEN=6015;MEINFO=L1Ta,3,6018,-;DIFF=0.09:n1-5547,n5698-5736,n5988;LP=21;RP=16;RA=0.392;ISTP=0;PRIOR=false;SR=13;GENE=MIR4432HG;AF=0.17492;AC=876	0.17492	.	.	.	.	.	.
2	60369590	TSD=ATAAATGCTAATAATTTTT;ASSESS=5;INTERNAL=null,null;SVTYPE=LINE1;SVLEN=6019;MEINFO=L1Ta,0,6019,+;DIFF=0.08:n1-5601,n5648,n5752-5795;LP=20;RP=11;RA=0.862;ISTP=0;PRIOR=false;SR=13	.	0.000716332	.	.	.	.	.
2	60460182	TSD=AAAAAAAAAAAA;ASSESS=5;INTERNAL=BCL11A,3_UTR;SVTYPE=LINE1;SVLEN=6006;MEINFO=L1Ambig,12,6018,-;DIFF=0.04:n1-4455,t4534c,g4553a,c4601g,a4602g,n4621-6019;LP=5;RP=13;RA=-1.379;ISTP=0;PRIOR=false;SR=5	.	.	.	.	.	.	9.0671e-05
2	61927304	TSD=null;ASSESS=3;INTERNAL=COMMD1,INTRONIC;SVTYPE=LINE1;SVLEN=6015;MEINFO=L1Ambig,4,6019,-;DIFF=0.06:n1-3,i72g,c72g,t153c,c181g,t231c,t254a,g313a,t333c,g353t,n429-6019;LP=1;RP=16;RA=-4;ISTP=-1;PRIOR=false;SR=10;AF=0.000150105;AC=1	.	.	.	0.000150105	.	.	.
2	61965831	TSD=AGTTCTTCGCTTTT;ASSESS=5;INTERNAL=NM_152516,INTRONIC;SVTYPE=LINE1;SVLEN=6017;MEINFO=L1Ta1d,2,6019,-;DIFF=0.13:n1-2,t231c,t254a,c327t,n505-6019;LP=34;RP=65;RA=-0.935;ISTP=0;PRIOR=false;SR=51	0.00299521	0.002149	.	0.00675473	.	0.00173611	.
2	62938103	TSD=AAAAATCTAAACAGT;ASSESS=5;INTERNAL=NM_001142614,INTRONIC;SVTYPE=LINE1;SVLEN=6019;MEINFO=L1Ta1d,0,6019,+;DIFF=0.09:n1-2,t231c,t254a,c327t,n348-6019;LP=36;RP=27;RA=0.415;ISTP=0;PRIOR=false;SR=28	0.00279553	0.00143266	.	0.00060042	0.00793651	0.000868056	.
2	63366360	TSD=AGAAATTAAAATCACT;ASSESS=5;INTERNAL=NM_015910,INTRONIC;SVTYPE=LINE1;SVLEN=6018;MEINFO=L1Ta1d,1,6019,+;DIFF=0.11:n1,c144g,t231c,t254a,n547-6019;LP=21;RP=12;RA=0.807;ISTP=0;PRIOR=false;SR=17	0.000599042	0.000716332	.	0.00150105	.	0.00260417	.
2	64720558	TSD=AAAAAAAAAAAAA;ASSESS=5;INTERNAL=null,null;SVTYPE=LINE1;SVLEN=6019;MEINFO=L1Ta,0,6019,+;DIFF=0.1:n1-5485,n5489-5490,n5492,n5501,t5535g,g5538c,n5549,n5558,n5711,n5732,n5764,n5770,n5781-5782,n5795,n5800,n5815-5816,n5830-5831,n5838,i5879g,c5945t;LP=25;RP=33;RA=-0.401;ISTP=0;PRIOR=false;SR=20;GENE=SERTAD2;AF=0.000399361;AC=2	0.000399361	.	.	.	.	.	.
2	65721755	TSD=AAGACTGCTTTACC;ASSESS=5;INTERNAL=null,null;SVTYPE=LINE1;SVLEN=6013;MEINFO=L1Ta1d,6,6019,+;DIFF=0.1:n1-6,c37a,c186a,t231c,t254a,c255t,n418-6019;LP=14;RP=16;RA=-0.193;ISTP=0;PRIOR=false;SR=19;AF=0.000199681;AC=1	0.000199681	.	.	.	.	.	.
2	65824787	TSD=TAAAACTAGTTTCT;ASSESS=5;INTERNAL=null,null;SVTYPE=LINE1;SVLEN=6015;MEINFO=L1Ta1d,4,6019,-;DIFF=0.12:n1-3,c144g,t231c,t254a,n522-6019;LP=6;RP=21;RA=-1.807;ISTP=0;PRIOR=false;SR=10;GENE=LOC105369168;AF=0.000199681;AC=1	0.000199681	.	.	.	.	.	.
2	66063767	TSD=AGACTTTTCAAATTCTT;ASSESS=5;INTERNAL=MIR4778,TERMINATOR;SVTYPE=LINE1;SVLEN=6016;MEINFO=L1Ambig,3,6019,-;DIFF=0.09:n1-3,g61a,i73g,t231c,t254a,g352a,n399,n467-6019;LP=4;RP=17;RA=-2.087;ISTP=0;PRIOR=false;SR=14;AF=0.000150105;AC=1	.	.	.	0.000150105	.	.	.
2	66808882	TSD=TCCATATTTTC;ASSESS=5;INTERNAL=null,null;SVTYPE=LINE1;SVLEN=6019;MEINFO=L1Ta1d,0,6019,-;DIFF=0.1:n1-2,t231c,t254a,c327t,n436-6019;LP=16;RP=16;RA=0;ISTP=0;PRIOR=false;SR=11	0.000599042	0.000716332	.	.	.	.	.
2	67032795	TSD=AACTAATCTTTTT;ASSESS=5;INTERNAL=LINC01828,PROMOTER;SVTYPE=LINE1;SVLEN=6019;MEINFO=L1Ta1d,0,6019,-;DIFF=0.1:g210c,t231c,t254a,a388g,n427-6019;LP=16;RP=28;RA=-0.807;ISTP=0;PRIOR=false;SR=24;AF=0.00030021;AC=2	.	.	.	0.00030021	.	.	.
2	67315146	TSD=AAGAGGTAAAAGA;ASSESS=5;INTERNAL=null,null;SVTYPE=LINE1;SVLEN=6019;MEINFO=L1Ambig,0,6019,+;DIFF=0.07:i73g,c93a,t231c,c251t,t254a,g352a,n395-421,g541a,n572-6019;LP=38;RP=21;RA=0.856;ISTP=0;PRIOR=false;SR=20;AF=0.000399361;AC=2	0.000399361	.	.	0.00315221	.	.	.
2	67525835	TSD=TTAGAAATATATTCTT;ASSESS=5;INTERNAL=null,null;SVTYPE=LINE1;SVLEN=6018;MEINFO=L1Ambig,1,6019,-;DIFF=0.08:n1-3,i73g,c115a,c143t,g167a,t231c,t254a,c257t,n336-6019;LP=8;RP=10;RA=-0.322;ISTP=0;PRIOR=false;SR=6;AF=0.000199681;AC=1	0.000199681	.	.	.	.	.	.
2	67579709	TSD=GACGTTCAGTTCTT;ASSESS=5;INTERNAL=null,null;SVTYPE=LINE1;SVLEN=6018;MEINFO=L1Ta1d,1,6019,-;DIFF=0.1:n1,t231c,t254a,n403-6019;LP=6;RP=14;RA=-1.222;ISTP=0;PRIOR=false;SR=17	0.000199681	0.000716332	.	.	.	.	.
2	67822104	TSD=AGAAACTCTTTCTT;ASSESS=5;INTERNAL=NR_110271,INTRONIC;SVTYPE=LINE1;SVLEN=6002;MEINFO=L1Ta1d,17,6019,-;DIFF=0.1:n1-17,t231c,t254a,n345,n618-6019;LP=515;RP=910;RA=-0.821;ISTP=0;PRIOR=false;SR=852	0.0263578	0.0336676	0.00044964	0.0852597	0.015873	0.00868056	.
2	68345372	TSD=AAGAAGCTCATTTT;ASSESS=5;INTERNAL=null,null;SVTYPE=LINE1;SVLEN=6016;MEINFO=L1Ambig,2,6018,+;DIFF=0.13:n1,i73g,t231c,t254a,g285a,g352a,g432t,n475,t550a,d676-678,t708c,g772a,n858-6019;LP=33;RP=35;RA=-0.085;ISTP=0;PRIOR=false;SR=32	0.000998403	0.00143266	.	0.00315221	.	.	.
2	69328107	TSD=null;ASSESS=3;INTERNAL=NM_002056,INTRONIC;SVTYPE=LINE1;SVLEN=6012;MEINFO=L1Ta1d,7,6019,-;DIFF=0.09:n1-7,t231c,t254a,c327t,n451,n537-6019;LP=5;RP=14;RA=-1.485;ISTP=-1;PRIOR=false;SR=4;GENE=GFPT1;AF=0.000199681;AC=1	0.000199681	.	.	.	.	.	.
2	72308039	TSD=TCATTAGAATTTCT;ASSESS=5;INTERNAL=NM_015189,INTRONIC;SVTYPE=LINE1;SVLEN=6009;MEINFO=L1Ambig,10,6019,-;DIFF=0.09:n1-7,i73g,c115a,c143t,g167a,g185a,t231c,t254a,c257t,n318-347,g352a,n498-564,n675-678,t708c,n719-6019;LP=13;RP=12;RA=0.115;ISTP=0;PRIOR=false;SR=10;GENE=EXOC6B;AF=0.000199681;AC=1	0.000199681	.	.	.	.	.	.
2	72437920	TSD=AAAGAACATTTTTAGG;ASSESS=5;INTERNAL=NM_015189,INTRONIC;SVTYPE=LINE1;SVLEN=6000;MEINFO=L1Ta1d,19,6019,+;DIFF=0.1:n363-6019;LP=51;RP=17;RA=1.585;ISTP=0;PRIOR=false;SR=34	0.000199681	.	.	0.00240168	.	0.00260417	.
2	73689244	TSD=null;ASSESS=4;INTERNAL=NR_003683,TERMINATOR;SVTYPE=LINE1;SVLEN=6019;MEINFO=L1Ta1d,0,6019,-;DIFF=0.09:n356-446,n597-6019;LP=14;RP=23;RA=-0.716;ISTP=0;PRIOR=false;SR=5;AF=0.0423323;AC=212	0.0423323	.	.	.	.	.	.
2	75508719	TSD=AAAAATCCCTAATAA;ASSESS=5;INTERNAL=NM_032181,INTRONIC;SVTYPE=LINE1;SVLEN=6018;MEINFO=L1Ambig,1,6019,+;DIFF=0.1:n1,i72g,c72g,t153c,c181g,t231c,t254a,g313a,t333c,g353t,n399,n450,n492-6019;LP=15;RP=14;RA=0.1;ISTP=0;PRIOR=false;SR=17;GENE=EVA1A;AF=0.000199681;AC=1	0.000199681	.	.	.	.	.	.
2	75939826	TSD=AAGTATAATTTTT;ASSESS=5;INTERNAL=null,null;SVTYPE=LINE1;SVLEN=6012;MEINFO=L1Ta,7,6019,-;DIFF=0.13:n1-5542,n5884,n5886,n5889-5891,n5899-5902,a5908t,n5910,n5913;LP=22;RP=38;RA=-0.788;ISTP=0;PRIOR=false;SR=30	.	0.00143266	.	.	.	.	.
2	77739502	TSD=AAGTCTCCTTTTCTT;ASSESS=5;INTERNAL=NR_110288,TERMINATOR;SVTYPE=LINE1;SVLEN=6015;MEINFO=L1Ambig,4,6019,-;DIFF=0.07:n1-5714,n5719,n5723,n5726,n5728-5730,n5733-5734,n5738-5739,n5744-5745,n5748,t5751a,n5754,n5766,c5781a,c5788a,n5865,n5923,t5925a,n5926,n5928,n5930,n5933,n5945,n6009;LP=6;RP=9;RA=-0.585;ISTP=0;PRIOR=false;SR=12	.	.	.	.	.	0.000868056	.
2	79702262	TSD=AAGAAATTGA;ASSESS=5;INTERNAL=NM_001282598,INTRONIC;SVTYPE=LINE1;SVLEN=6019;MEINFO=L1Ta,0,6019,+;DIFF=0.12:n1-5285,n5409,n5436-5620,c5802g,c5945t;LP=2207;RP=1284;RA=0.781;ISTP=0;PRIOR=false;SR=1670	0.0565096	0.0888252	.	0.18508	0.031746	0.0173611	.
2	80843072	TSD=TGCTCTTCATTTTTT;ASSESS=5;INTERNAL=null,null;SVTYPE=LINE1;SVLEN=6018;MEINFO=L1Ta1d,1,6019,-;DIFF=0.11:n11-12,c31a,g167a,t231c,t254a,c324a,n394-6019;LP=19;RP=18;RA=0.078;ISTP=0;PRIOR=false;SR=17;AF=0.000199681;AC=1	0.000199681	.	.	0.00030021	.	.	.
2	81047777	TSD=GACAGCATGTTTTTT;ASSESS=5;INTERNAL=CTNNA2,TERMINATOR;SVTYPE=LINE1;SVLEN=6015;MEINFO=L1Ta1d,3,6018,+;DIFF=0.12:n1-2,t231c,t254a,c327t,n431-6019;LP=19;RP=27;RA=-0.507;ISTP=0;PRIOR=false;SR=29;AF=0.00030021;AC=2	.	.	.	0.00030021	.	.	.
2	81389358	TSD=AAGAAAATTTTGC;ASSESS=5;INTERNAL=null,null;SVTYPE=LINE1;SVLEN=6019;MEINFO=L1Ta1d,0,6019,+;DIFF=0.07:n1-2,c63t,t153g,t231c,t254a,n425-6019;LP=22;RP=4;RA=2.459;ISTP=0;PRIOR=false;SR=8	0.000399361	.	.	0.00030021	.	0.000868056	.
2	81870919	TSD=AAATAAATTCATATTC;ASSESS=5;INTERNAL=LINC01815,PROMOTER;SVTYPE=LINE1;SVLEN=6017;MEINFO=L1Ta1d,2,6019,+;DIFF=0.1:n1-2,t231c,t254a,n326-6019;LP=16203;RP=14535;RA=0.157;ISTP=0;PRIOR=false;SR=21978;AF=0.180426;AC=1202	.	.	0.247752	0.180426	.	.	.
2	84559088	TSD=TAAAAGCAAACAACA;ASSESS=5;INTERNAL=NM_001370,INTRONIC;SVTYPE=LINE1;SVLEN=6012;MEINFO=L1Ta1d,7,6019,+;DIFF=0.11:n1-7,c37a,t231c,g252c,t254a,g285a,c363t,n458-6019;LP=14;RP=10;RA=0.485;ISTP=0;PRIOR=false;SR=6	0.00239617	0.000716332	.	.	.	.	.
2	84709580	TSD=null;ASSESS=4;INTERNAL=LOC107985906,INTRONIC;SVTYPE=LINE1;SVLEN=6018;MEINFO=L1Ta1d,1,6019,+;DIFF=0.01:n1,n131-299,n376-6019;LP=8;RP=1;RA=3;ISTP=-1;PRIOR=false;SR=9	.	.	.	.	.	.	1.00735e-05
2	84762632	TSD=AAAAAGATGTATACCCA;ASSESS=5;INTERNAL=NM_001370,INTRONIC;SVTYPE=LINE1;SVLEN=6019;MEINFO=L1Ta1d,0,6019,+;DIFF=0.11:t231c,n379-6019;LP=19;RP=20;RA=-0.074;ISTP=0;PRIOR=false;SR=22	0.000199681	0.000716332	.	.	.	.	.
2	86296873	TSD=AAAAAAGAAAAAAAAT;ASSESS=5;INTERNAL=NM_001164730,INTRONIC;SVTYPE=LINE1;SVLEN=6019;MEINFO=L1Ta,0,6019,+;DIFF=0.11:n1-5469,n5574,n5602,n5620-5666,g5883a,g5886a;LP=19;RP=17;RA=0.16;ISTP=0;PRIOR=false;SR=11;GENE=REEP1;AF=0.000199681;AC=1	0.000199681	.	.	.	.	.	.
2	86472581	TSD=AAAATTAAAAACTTTC;ASSESS=5;INTERNAL=NM_001146688,INTRONIC;SVTYPE=LINE1;SVLEN=6017;MEINFO=L1Ta1d,2,6019,-;DIFF=0.11:n1,t231c,t254a,n452-6019;LP=10;RP=16;RA=-0.678;ISTP=0;PRIOR=false;SR=12	0.000199681	0.000716332	.	.	.	.	.
2	87168047	TSD=GAAAGTGCTCTTTGA;ASSESS=5;INTERNAL=null,null;SVTYPE=LINE1;SVLEN=6017;MEINFO=L1Ta,2,6019,+;DIFF=0.07:n1-5521;LP=26;RP=184;RA=-2.823;ISTP=0;PRIOR=false;SR=116	0.0155751	0.019341	.	.	.	.	.
2	88829287	TSD=GTATAACTTTCTT;ASSESS=5;INTERNAL=null,null;SVTYPE=LINE1;SVLEN=6019;MEINFO=L1Ta1d,0,6019,-;DIFF=0.09:g210c,t231c,t254a,n308-324,a388g,n475-6019;LP=9;RP=18;RA=-1;ISTP=0;PRIOR=false;SR=12	0.000199681	0.000716332	.	.	.	.	.
2	88833528	TSD=GAAATTTTATATTT;ASSESS=5;INTERNAL=null,null;SVTYPE=LINE1;SVLEN=6017;MEINFO=L1Ta1d,2,6019,-;DIFF=0.11:n1-2,t231c,t254a,n409,a423g,n447-6019;LP=14;RP=21;RA=-0.585;ISTP=0;PRIOR=false;SR=16	0.000210881	0.0015015	.	.	.	0.000868056	.
2	88896481	TSD=AAAAAAAAAAACC;ASSESS=5;INTERNAL=MIR4436A,TERMINATOR;SVTYPE=LINE1;SVLEN=6019;MEINFO=L1Ta1d,0,6019,+;DIFF=0.13:t231c,t254a,c324a,n424,n429,n497-6019;LP=42;RP=15;RA=1.485;ISTP=0;PRIOR=false;SR=27;AF=0.00030021;AC=2	.	.	.	0.00030021	.	.	.
2	88956704	TSD=AAGGAAAAACAGG;ASSESS=5;INTERNAL=MIR4436A,TERMINATOR;SVTYPE=LINE1;SVLEN=6018;MEINFO=L1Ta1d,1,6019,+;DIFF=0.09:t231c,t254a,n394-6019;LP=43;RP=15;RA=1.519;ISTP=0;PRIOR=false;SR=36;AF=0.000450315;AC=3	.	.	.	0.000450315	.	.	.
2	89621542	TSD=AAAAAAATACA;ASSESS=5;INTERNAL=null,null;SVTYPE=LINE1;SVLEN=6015;MEINFO=L1Ta1d,3,6018,-;DIFF=0.09:n1-2,t231c,t254a,n380-6019;LP=14;RP=4;RA=1.807;ISTP=0;PRIOR=false;SR=2	0.000199681	0.000716332	.	.	.	.	.
2	89644024	TSD=AAGAAAATGTTT;ASSESS=5;INTERNAL=null,null;SVTYPE=LINE1;SVLEN=6018;MEINFO=L1Ta1d,1,6019,+;DIFF=0.1:n1,c144g,t231c,t254a,n463,n505-6019;LP=10;RP=8;RA=0.322;ISTP=0;PRIOR=false;SR=14	0.000798722	0.000716332	.	.	.	.	.
2	92115609	TSD=TAGAGCGGTTTT;ASSESS=5;INTERNAL=ACTR3BP2,TERMINATOR;SVTYPE=LINE1;SVLEN=6019;MEINFO=L1Ta1d,0,6019,-;DIFF=0.12:t231c,t254a,n412-6019;LP=7;RP=21;RA=-1.585;ISTP=0;PRIOR=false;SR=11;AF=0.000150602;AC=1	.	.	.	0.000150602	.	.	.
2	92942362	TSD=null;ASSESS=4;INTERNAL=null,null;SVTYPE=LINE1;SVLEN=6014;MEINFO=L1Ta,4,6018,+;DIFF=0.08:n1-5440,g5520c,t5535g,a5537t,g5538c,n5913;LP=30;RP=3;RA=3.322;ISTP=-1;PRIOR=false;SR=11;AF=0.0009996;AC=5	0.0009996	.	.	.	.	.	.
2	95150291	TSD=AAAAAAAAAAAAAAAAAAA;ASSESS=5;INTERNAL=ZNF514,INTRONIC;SVTYPE=LINE1;SVLEN=6013;MEINFO=L1Ambig,5,6018,-;DIFF=0.04:n1-3852,g3864a,g3918a,c3954t,n3959-3966,t3979a,g3984a,g4000a,c4030a,g4038a,n4059-4061,c4095t,a4097g,n4104-4126,n4203-4464,g4527c,g4553a,n4561-4774,t4821c,c4834t,n4851-5051,t5075c,g5076a,t5088a,a5092t,c5093a,n5111-5297,t5316a,t5325c,c5391t,n5411-5426,n5468-5473,n5487,n5513-5608,n5640…	.	.	.	.	.	.	0.0131863
2	97123025	TSD=TATTGTGTCGTTTTT;ASSESS=5;INTERNAL=NM_001164315,INTRONIC;SVTYPE=LINE1;SVLEN=6019;MEINFO=L1Ta1d,0,6019,-;DIFF=0.06:c166t,n376-377,n387-6019;LP=2;RP=15;RA=-2.907;ISTP=0;PRIOR=false;SR=8;GENE=ANKRD36;AF=0.00019976;AC=1	0.00019976	.	.	.	.	.	.
2	97158218	TSD=TTTTTTTTT;ASSESS=5;INTERNAL=ANKRD36,INTRONIC;SVTYPE=LINE1;SVLEN=6014;MEINFO=L1Ta1d,4,6018,+;DIFF=0.03:n1-3,c115a,c143t,g167a,n201-6019;LP=8;RP=51;RA=-2.672;ISTP=0;PRIOR=false;SR=25	.	.	.	.	.	.	0.000231775
2	97911786	TSD=AAAAATCTCAGAACATG;ASSESS=5;INTERNAL=TMEM131,INTRONIC;SVTYPE=LINE1;SVLEN=6016;MEINFO=L1Ta1d,3,6019,+;DIFF=0.07:n1-2,t231c,t254a,n321-323,n475-6019;LP=28;RP=14;RA=1;ISTP=0;PRIOR=false;SR=28;AF=0.00030021;AC=2	.	.	.	0.00030021	.	.	.
2	99694180	TSD=ACAAGTGTG;ASSESS=5;INTERNAL=NM_002285,INTRONIC;SVTYPE=LINE1;SVLEN=6019;MEINFO=L1Ta1d,0,6019,+;DIFF=0.06:t231c,t254a,n385-6019;LP=44;RP=2;RA=4.459;ISTP=0;PRIOR=false;SR=21	0.00139776	.	0.00359712	0.00210147	0.00793651	0.00260417	.
2	100095600	TSD=TACCCCCCATTGTTT;ASSESS=5;INTERNAL=AFF3,INTRONIC;SVTYPE=LINE1;SVLEN=6007;MEINFO=L1Ta1d,12,6019,-;DIFF=0.08:n1-11,t231c,t254a,n356-6019;LP=18;RP=47;RA=-1.385;ISTP=0;PRIOR=false;SR=30;AF=0.000450315;AC=3	.	.	.	0.000450315	.	.	.
2	101188227	TSD=CACATGAGGGTTTTT;ASSESS=5;INTERNAL=TBC1D8-AS1,TERMINATOR;SVTYPE=LINE1;SVLEN=6019;MEINFO=L1Ta1d,0,6019,-;DIFF=0.09:g184c,g210c,t231c,t254a,n325,n341-6019;LP=27;RP=44;RA=-0.705;ISTP=0;PRIOR=false;SR=45;AF=0.000450315;AC=3	.	.	.	0.000450315	.	.	.
2	101213730	TSD=ACCTGGCTAATTTTTTTTT;ASSESS=5;INTERNAL=CNOT11,PROMOTER;SVTYPE=LINE1;SVLEN=6019;MEINFO=L1Ta1d,0,6019,-;DIFF=0.09:g210c,t231c,t254a,t268a,c276a,n294-295,n300,n302-303,n305,g306a,n316-319,n322,n325,n327,n335,n337,n339,n344,n353,n357,n364-6019;LP=13;RP=13;RA=0;ISTP=0;PRIOR=false;SR=16;AF=0.000150105;AC=1	.	.	.	0.000150105	.	.	.
2	101615111	TSD=CTGTATATTTC;ASSESS=5;INTERNAL=null,null;SVTYPE=LINE1;SVLEN=6019;MEINFO=L1Ta1d,0,6019,-;DIFF=0.11:g210c,t231c,g232c,t254a,n376-6019;LP=11;RP=23;RA=-1.064;ISTP=0;PRIOR=false;SR=22;AF=0.000199681;AC=1	0.000199681	.	.	.	.	.	.
2	101910513	TSD=null;ASSESS=4;INTERNAL=null,null;SVTYPE=LINE1;SVLEN=6014;MEINFO=L1Ambig,4,6018,-;DIFF=0.12:n1-3,g61a,i73g,c205t,t231c,t254a,n324-6019;LP=16;RP=16;RA=0;ISTP=0;PRIOR=false;SR=6;AF=0.000199681;AC=1	0.000199681	.	.	0.000150105	.	.	.
2	105016149	TSD=AAAAATTAAAGCAGTG;ASSESS=5;INTERNAL=NR_110603,INTRONIC;SVTYPE=LINE1;SVLEN=6018;MEINFO=L1Ta1d,1,6019,+;DIFF=0.12:g167a,t231c,t254a,c324a,n392-730,n881-6019;LP=25;RP=13;RA=0.943;ISTP=0;PRIOR=false;SR=9;GENE=LOC102724691;AF=0.000199681;AC=1	0.000199681	.	.	.	.	.	.
2	105082932	TSD=AACAAATGATTTCTT;ASSESS=5;INTERNAL=MRPS9,INTRONIC;SVTYPE=LINE1;SVLEN=6016;MEINFO=L1Ta1d,3,6019,-;DIFF=0.08:n1-3,t231c,t254a,g313t,n351,n362,n418-6019;LP=8;RP=14;RA=-0.807;ISTP=0;PRIOR=false;SR=11;AF=0.000150105;AC=1	.	.	.	0.000150105	.	.	.
2	105600225	TSD=GGGTCTCCATTTCTT;ASSESS=5;INTERNAL=NR_038891,INTRONIC;SVTYPE=LINE1;SVLEN=6014;MEINFO=L1Ta1d,5,6019,-;DIFF=0.13:n1-4,g210c,t231c,t254a,n501-6019;LP=354;RP=547;RA=-0.628;ISTP=0;PRIOR=false;SR=415	0.019369	0.0200573	.	0.0558391	0.00793651	0.0078125	.
2	106025350	TSD=AGAAAGTAATAATATGG;ASSESS=5;INTERNAL=null,null;SVTYPE=LINE1;SVLEN=6017;MEINFO=L1Ta1d,2,6019,+;DIFF=0.1:t231c,t254a,c324a,n361-6019;LP=17;RP=8;RA=1.087;ISTP=0;PRIOR=false;SR=15	.	.	.	.	.	0.000868056	.
2	106170562	TSD=null;ASSESS=4;INTERNAL=NM_001253875,INTRONIC;SVTYPE=LINE1;SVLEN=6015;MEINFO=L1Ta1d,3,6018,-;DIFF=0.05:n1-2,t231c,t254a,c279a,n304-305,n308,g321a,c327t,n340-342,n348-6019;LP=1;RP=17;RA=-4.087;ISTP=0;PRIOR=false;SR=2	0.000199681	.	.	.	.	0.000868056	.
2	106339397	TSD=TACAAGTTCTATT;ASSESS=5;INTERNAL=PLGLA,PROMOTER;SVTYPE=LINE1;SVLEN=6019;MEINFO=L1Ta1d,0,6019,-;DIFF=0.11:g38c,n389-6019;LP=9;RP=13;RA=-0.531;ISTP=0;PRIOR=false;SR=9;AF=0.000150105;AC=1	.	.	.	0.000150105	.	.	.
2	106482304	TSD=TGAATAATTTCTTTTTGTT;ASSESS=5;INTERNAL=null,null;SVTYPE=LINE1;SVLEN=6018;MEINFO=L1Ta,1,6019,-;DIFF=0.11:n1-5621,a5837c;LP=17;RP=15;RA=0.181;ISTP=0;PRIOR=false;SR=14;GENE=LOC107985931;AF=0.000399361;AC=2	0.000399361	.	.	0.00030021	.	.	.
2	107381369	TSD=GCAAGCGCTTCTTTA;ASSESS=5;INTERNAL=null,null;SVTYPE=LINE1;SVLEN=6019;MEINFO=L1Ta1d,0,6019,-;DIFF=0.12:t231c,t254a,n460-530,n552,n579,n583,n586,n680-6019;LP=202;RP=302;RA=-0.58;ISTP=0;PRIOR=false;SR=238	0.00878594	0.012894	.	0.0358751	.	0.00347222	.
2	108171673	TSD=AAAAATAAAAAAATAA;ASSESS=5;INTERNAL=NR_131251,INTRONIC;SVTYPE=LINE1;SVLEN=6015;MEINFO=L1Ta1d,3,6018,+;DIFF=0.08:n1-2,g38a,t231c,t254a,n399,n427,n463,n486-6019;LP=35;RP=35;RA=0;ISTP=0;PRIOR=false;SR=12	.	0.00143266	.	0.00555389	.	.	.
2	108815972	TSD=CAAGTTTATGAACTTTT;ASSESS=5;INTERNAL=CCDC138,EXON_10;SVTYPE=LINE1;SVLEN=6017;MEINFO=L1Ta1d,2,6019,-;DIFF=0.07:n1-2,t231c,t254a,n288-6019;LP=6;RP=15;RA=-1.322;ISTP=0;PRIOR=false;SR=15	.	.	.	.	.	.	5.03677e-05
2	110808023	TSD=TCAGGTTTTCTCTT;ASSESS=5;INTERNAL=NM_001142807,INTRONIC;SVTYPE=LINE1;SVLEN=6016;MEINFO=L1Ta1d,3,6019,-;DIFF=0.09:n1-2,t231c,t254a,t299g,n415-6019;LP=9;RP=13;RA=-0.531;ISTP=0;PRIOR=false;SR=13;GENE=ACOXL;AF=0.000199681;AC=1	0.000199681	.	.	0.000450315	.	.	.
2	111238513	TSD=null;ASSESS=4;INTERNAL=MIR4435-2HG,INTRONIC;SVTYPE=LINE1;SVLEN=6017;MEINFO=L1Ta1d,1,6018,-;DIFF=0.07:g161a,n180,t231g,g244a,g246a,n251-252,t254a,n255-256,c259a,n268-271,n273,n276,c279a,g285a,n293-294,n304-305,n307,a314t,n321,n324-325,n332,n356,n358-360,n363-367,n377,n385-6019;LP=15;RP=10;RA=0.585;ISTP=0;PRIOR=false;SR=5;AF=0.000150105;AC=1	.	.	.	0.000150105	.	.	.
2	111993558	TSD=GAAAAGCCAGCCCA;ASSESS=5;INTERNAL=NM_006343,INTRONIC;SVTYPE=LINE1;SVLEN=6019;MEINFO=L1Ta,0,6019,+;DIFF=0.08:n1-5674;LP=12;RP=15;RA=-0.322;ISTP=0;PRIOR=false;SR=8;GENE=MERTK;AF=0.000199681;AC=1	0.000199681	.	.	.	.	.	.
2	112218068	TSD=CTCAGTTGTTCTTTC;ASSESS=5;INTERNAL=NM_032494,INTRONIC;SVTYPE=LINE1;SVLEN=6015;MEINFO=L1Ambig,4,6019,-;DIFF=0.12:n1-2,g61a,i73g,t231c,t254a,g352a,n369,n418-435,n451,n586-6019;LP=11;RP=13;RA=-0.241;ISTP=0;PRIOR=false;SR=14;GENE=FBLN7;AF=0.000199681;AC=1	0.000199681	.	.	.	.	.	.
2	113086795	TSD=AAAAATAGAAATC;ASSESS=5;INTERNAL=IL1F10,TERMINATOR;SVTYPE=LINE1;SVLEN=6019;MEINFO=L1Ta1d,0,6019,+;DIFF=0.11:g53a,t231c,t254a,c324a,n482,n494-6019;LP=40;RP=28;RA=0.515;ISTP=0;PRIOR=false;SR=31;AF=0.000450315;AC=3	.	.	.	0.000450315	.	.	.
2	113390538	TSD=GTAAATGCAGTTTTT;ASSESS=5;INTERNAL=null,null;SVTYPE=LINE1;SVLEN=6019;MEINFO=L1Ta1d,0,6019,-;DIFF=0.09:t231c,t254a,n482-6019;LP=3;RP=23;RA=-2.939;ISTP=0;PRIOR=false;SR=12	0.000399361	0.000716332	.	0.000150105	.	.	.
2	114068726	TSD=TAAACATTAAAATA;ASSESS=5;INTERNAL=null,null;SVTYPE=LINE1;SVLEN=6019;MEINFO=L1Ta1d,0,6019,+;DIFF=0.09:n1-10,t25c,t231c,t254a,n368,n382,t400g,n408,n411,n423,n449,n461,n476,n495-6019;LP=95;RP=45;RA=1.078;ISTP=0;PRIOR=false;SR=57	0.00439297	0.00358166	.	0.00255179	.	0.00173611	.
2	114330517	TSD=null;ASSESS=4;INTERNAL=null,null;SVTYPE=LINE1;SVLEN=6015;MEINFO=L1Ta,3,6018,-;DIFF=0.07:n1-5714;LP=16;RP=6;RA=1.415;ISTP=0;PRIOR=false;SR=7;AF=0.000199681;AC=1	0.000199681	.	.	.	.	.	.
2	117862423	TSD=AAGACAGGGGTCTT;ASSESS=5;INTERNAL=null,null;SVTYPE=LINE1;SVLEN=6019;MEINFO=L1Ta1d,0,6019,+;DIFF=0.12:t231c,t254a,n451-471,n622-6019;LP=16;RP=12;RA=0.415;ISTP=0;PRIOR=false;SR=21;AF=0.000199681;AC=1	0.000199681	.	.	.	.	.	.
2	119537559	TSD=CTGTATGACTGACTTCT;ASSESS=5;INTERNAL=NR_073133,PROMOTER;SVTYPE=LINE1;SVLEN=6018;MEINFO=L1Ta1d,1,6019,-;DIFF=0.11:t231c,t254a,c324a,n411,n468,n493-509,n511,n518,g520c,n525,c529a,n531,n533,n535-537,n541-542,n550,n553,n556,n560-561,n568,n570,n576-577,n580,n586-587,n592,n598,n601,n610,n616,n622,n637,n660-6019;LP=603;RP=975;RA=-0.693;ISTP=0;PRIOR=false;SR=671	0.0227636	0.0336676	.	0.0583909	0.015873	0.0078125	.
2	119872144	TSD=TATTAATTTTATTTT;ASSESS=5;INTERNAL=NM_002830,INTRONIC;SVTYPE=LINE1;SVLEN=6018;MEINFO=L1Ta,1,6019,-;DIFF=0.12:n1-5547,n5989,n5999,n6009-6019;LP=12;RP=23;RA=-0.939;ISTP=0;PRIOR=false;SR=12	0.000199681	0.000716332	.	0.000150105	.	.	.
2	120045271	TSD=CACTTTTCTTCTT;ASSESS=5;INTERNAL=NM_001184938,INTRONIC;SVTYPE=LINE1;SVLEN=6019;MEINFO=L1Ta1d,0,6019,-;DIFF=0.1:n1-2,t231c,t254a,c327t,n369,n386-422,n460,n573-6019;LP=9;RP=15;RA=-0.737;ISTP=0;PRIOR=false;SR=14;GENE=EPB41L5;AF=0.000199681;AC=1	0.000199681	.	.	.	.	.	.
2	122472089	TSD=null;ASSESS=4;INTERNAL=TSN,TERMINATOR;SVTYPE=LINE1;SVLEN=6016;MEINFO=L1Ta1d,2,6018,-;DIFF=0.04:n1,g57t,t82a,t231c,t254a,c255g,n330-6019;LP=5;RP=1;RA=2.322;ISTP=0;PRIOR=false;SR=3;AF=0.000150105;AC=1	.	.	.	0.000150105	.	.	.
2	124294149	TSD=null;ASSESS=4;INTERNAL=NM_130773,INTRONIC;SVTYPE=LINE1;SVLEN=6014;MEINFO=L1Ta1d,4,6018,-;DIFF=0.06:n1-3,g167a,t231c,t254a,c324a,n462-6019;LP=10;RP=1;RA=3.322;ISTP=0;PRIOR=false;SR=8	.	0.00358166	.	.	.	.	.
2	124294179	TSD=dACA;ASSESS=5;INTERNAL=NM_130773,INTRONIC;SVTYPE=LINE1;SVLEN=6014;MEINFO=L1Ta1d,4,6018,-;DIFF=0.12:n1-3,g167a,t231c,t254a,c324a,n375-377,c529a,n530,n541-6019;LP=33;RP=5;RA=2.722;ISTP=0;PRIOR=false;SR=26;GENE=CNTNAP5;AF=0.00738818;AC=37	0.00738818	.	.	.	.	.	.
2	124797152	TSD=null;ASSESS=3;INTERNAL=NM_130773,INTRONIC;SVTYPE=LINE1;SVLEN=6017;MEINFO=L1Ta1d,1,6018,+;DIFF=0.1:g53a,c90t,t231c,t254a,c324a,n432-6019;LP=19;RP=13;RA=0.547;ISTP=0;PRIOR=false;SR=3;GENE=CNTNAP5;AF=0.000199681;AC=1	0.000199681	.	.	.	.	.	.
2	124907261	TSD=null;ASSESS=4;INTERNAL=NM_130773,INTRONIC;SVTYPE=LINE1;SVLEN=6018;MEINFO=L1Ta1d,1,6019,+;DIFF=0.04:n1-3,n166,n319-6019;LP=8;RP=1;RA=3;ISTP=-1;PRIOR=false;SR=6	.	.	.	.	.	0.000868056	.
2	125779477	TSD=GCTTCGGTGTTAATTTAT;ASSESS=5;INTERNAL=CNTNAP5,TERMINATOR;SVTYPE=LINE1;SVLEN=6018;MEINFO=L1Ambig,1,6019,-;DIFF=0.12:n1-3,i73g,c115a,g167a,t231c,t254a,c257t,g352a,n466-6019;LP=65;RP=116;RA=-0.836;ISTP=0;PRIOR=false;SR=139;AF=0.00135095;AC=9	.	.	.	0.00135095	.	.	.
2	125974536	TSD=TCAATTGAGCAATAAA;ASSESS=5;INTERNAL=null,null;SVTYPE=LINE1;SVLEN=6018;MEINFO=L1Ta1d,1,6019,+;DIFF=0.11:n1,t231c,t254a,n543,n595-6019;LP=20;RP=6;RA=1.737;ISTP=0;PRIOR=false;SR=14;AF=0.000199681;AC=1	0.000199681	.	.	.	.	.	.
2	126204810	TSD=CATGATCTAGTATTTTT;ASSESS=5;INTERNAL=null,null;SVTYPE=LINE1;SVLEN=6019;MEINFO=L1Ta1d,0,6019,-;DIFF=0.1:t231c,t254a,n347-455,n465,n475,n492,n500,n502,n508,n520,n537,n540,n558,n561,n564,n587,n606-6019;LP=22;RP=43;RA=-0.967;ISTP=0;PRIOR=false;SR=30	0.00159744	0.002149	.	0.00525368	.	.	.
2	126264200	TSD=GACATTCAGAGTTTT;ASSESS=5;INTERNAL=null,null;SVTYPE=LINE1;SVLEN=6018;MEINFO=L1Ta,1,6019,-;DIFF=0.1:n1-5544,n5695-5705,g5809c;LP=47;RP=115;RA=-1.291;ISTP=0;PRIOR=false;SR=86	0.00559105	0.00429799	.	.	.	.	.
2	128732822	TSD=AGAACACTAGTTCTTT;ASSESS=5;INTERNAL=null,null;SVTYPE=LINE1;SVLEN=6014;MEINFO=L1Ta1d,4,6018,+;DIFF=0.09:n1-3,n425-6019;LP=9;RP=25;RA=-1.474;ISTP=0;PRIOR=false;SR=17;AF=0.000199681;AC=1	0.000199681	.	.	.	.	.	.
2	128816410	TSD=AAAAAAAAAA;ASSESS=5;INTERNAL=null,null;SVTYPE=LINE1;SVLEN=6014;MEINFO=L1Ambig,5,6019,+;DIFF=0.11:i73g,t231c,t254a,g306a,t333g,g352a,n468,n472,n482,n491,n532-6019;LP=4104;RP=2298;RA=0.837;ISTP=0;PRIOR=false;SR=2216	0.167532	0.151862	0.196493	0.0340739	0.15873	0.183246	.
2	128915411	TSD=AAGAAGGTTTCCC;ASSESS=5;INTERNAL=null,null;SVTYPE=LINE1;SVLEN=6019;MEINFO=L1Ta1d,0,6019,+;DIFF=0.1:t231c,t254a,n479-6019;LP=22;RP=11;RA=1;ISTP=0;PRIOR=false;SR=13;AF=0.000199681;AC=1	0.000199681	.	.	.	.	.	.
2	129070931	TSD=GAACCTGTCTGATTTCTT;ASSESS=5;INTERNAL=null,null;SVTYPE=LINE1;SVLEN=6019;MEINFO=L1Ta1d,0,6019,-;DIFF=0.06:t231c,t254a,n459-6019;LP=2;RP=39;RA=-4.285;ISTP=0;PRIOR=false;SR=15;AF=0.000399361;AC=2	0.000399361	.	.	.	.	.	.
2	129076804	TSD=AAGAGGCTC;ASSESS=5;INTERNAL=null,null;SVTYPE=LINE1;SVLEN=6019;MEINFO=L1Ta1d,0,6019,+;DIFF=0.09:n310-418,n472,n494,n569-6019;LP=21;RP=13;RA=0.692;ISTP=0;PRIOR=false;SR=21	0.000199681	0.000716332	.	0.00030021	.	.	.
2	129437917	TSD=null;ASSESS=4;INTERNAL=null,null;SVTYPE=LINE1;SVLEN=6017;MEINFO=L1Ta1d,2,6019,+;DIFF=0.05:n1-2,a140g,t231c,t254a,n323-340,n375-376,a388g,n407,n460,n492-6019;LP=18;RP=1;RA=4.17;ISTP=-1;PRIOR=false;SR=6	.	.	.	.	.	0.000868056	.
2	129646676	TSD=GACTGTTCTCCTGACTTCT;ASSESS=5;INTERNAL=null,null;SVTYPE=LINE1;SVLEN=6015;MEINFO=L1Ta1d,4,6019,-;DIFF=0.09:n1-4,t231c,t254a,n418-517,n539,n577,g617a,n668-6019;LP=5;RP=11;RA=-1.138;ISTP=0;PRIOR=false;SR=9;AF=0.000199681;AC=1	0.000199681	.	.	.	.	.	.
2	131312948	TSD=GAAAAGATC;ASSESS=5;INTERNAL=LOC440910,TERMINATOR;SVTYPE=LINE1;SVLEN=6019;MEINFO=L1Ambig,0,6019,+;DIFF=0.1:c72t,t231c,t254a,c324a,n425-6019;LP=13;RP=9;RA=0.531;ISTP=0;PRIOR=false;SR=12;AF=0.000150105;AC=1	.	.	.	0.000150105	.	.	.
2	131467685	TSD=TTTTTTTTTTTTT;ASSESS=5;INTERNAL=NM_080386,PROMOTER;SVTYPE=LINE1;SVLEN=6019;MEINFO=L1Ta1d,0,6019,-;DIFF=0.11:t231c,t254a,a423g,n434-6019;LP=14;RP=18;RA=-0.363;ISTP=0;PRIOR=false;SR=6;GENE=POTEI;AF=0.00479233;AC=24	0.00479233	.	.	.	.	.	.
2	133775636	TSD=GAGTGTGTTTCTT;ASSESS=5;INTERNAL=MIR3679,PROMOTER;SVTYPE=LINE1;SVLEN=6012;MEINFO=L1Ta1d,7,6019,-;DIFF=0.08:n1-7,t231c,t254a,c327t,n422-6019;LP=39;RP=110;RA=-1.496;ISTP=0;PRIOR=false;SR=80;AF=0.00120084;AC=8	.	.	.	0.00120084	.	.	.
2	134360139	TSD=AACATTTCAC;ASSESS=5;INTERNAL=NM_002410,INTRONIC;SVTYPE=LINE1;SVLEN=6018;MEINFO=L1Ta1d,1,6019,+;DIFF=0.06:n1,t231c,t254a,n366,n412,n442-6019;LP=41;RP=1;RA=5.358;ISTP=0;PRIOR=false;SR=32	.	.	.	.	.	0.00260417	.
2	134385750	TSD=AAAAAATGAAAAGTTTTG;ASSESS=5;INTERNAL=MGAT5,INTRONIC;SVTYPE=LINE1;SVLEN=6019;MEINFO=L1Ta1d,0,6019,+;DIFF=0.1:c144g,t231c,t254a,n400-6019;LP=47;RP=30;RA=0.648;ISTP=0;PRIOR=false;SR=39;AF=0.00060042;AC=4	.	.	.	0.00060042	.	.	.
2	135084672	TSD=GGAAATATTTTCT;ASSESS=5;INTERNAL=NM_001172435,INTRONIC;SVTYPE=LINE1;SVLEN=6014;MEINFO=L1Ta1d,5,6019,-;DIFF=0.08:n1-4,t231c,t254a,n408-477,n493,n496,n640,n649-6019;LP=1;RP=60;RA=-5.907;ISTP=0;PRIOR=false;SR=48	.	0.00286533	.	.	.	.	.
2	136751359	TSD=CATTGCCCAATTTC;ASSESS=5;INTERNAL=null,null;SVTYPE=LINE1;SVLEN=6019;MEINFO=L1Ta1d,0,6019,-;DIFF=0.11:t56g,c377t,n545-6019;LP=7;RP=21;RA=-1.585;ISTP=0;PRIOR=false;SR=16;AF=0.000199681;AC=1	0.000199681	.	.	.	.	.	.
2	137234810	TSD=AAGAAAAACATATTT;ASSESS=5;INTERNAL=NM_001080427,INTRONIC;SVTYPE=LINE1;SVLEN=6016;MEINFO=L1Ta1d,3,6019,+;DIFF=0.07:n1-3,t231c,t254a,c327t,n415-6019;LP=17;RP=1;RA=4.087;ISTP=0;PRIOR=false;SR=17	0.000199681	0.000716332	.	.	.	.	.
2	137526439	TSD=TGTTTGTTTGTTTTT;ASSESS=5;INTERNAL=NM_001080427,INTRONIC;SVTYPE=LINE1;SVLEN=6017;MEINFO=L1Ta1d,2,6019,-;DIFF=0.09:n1-11,n16,t231c,t254a,c327t,n342,n366,n419-6019;LP=10;RP=19;RA=-0.926;ISTP=0;PRIOR=false;SR=12;GENE=THSD7B;AF=0.000199681;AC=1	0.000199681	.	.	.	.	.	.
2	137918839	TSD=TAATTTTATTATT;ASSESS=5;INTERNAL=NR_120402,INTRONIC;SVTYPE=LINE1;SVLEN=6017;MEINFO=L1Ta1d,2,6019,-;DIFF=0.08:n1-2,t231c,t254a,c327t,n374-6019;LP=14;RP=17;RA=-0.28;ISTP=0;PRIOR=false;SR=17;GENE=LOC101928273;AF=0.000199681;AC=1	0.000199681	.	.	.	.	.	.
2	139361863	TSD=TAGATTTCTT;ASSESS=5;INTERNAL=YY1P2,TERMINATOR;SVTYPE=LINE1;SVLEN=6018;MEINFO=L1Ta,1,6019,-;DIFF=0.07:n1-5594,n5597,n5624,n5642,n5645,n5669,n5672,a5678t,n5679,n5687,n5701,n5704,n5715,n5718-5719,g5723a,n5724,g5729a,t5732a,g5733t,t5737c,t5738a,g5739a,n5745-5757,a5826t,a5837c;LP=12;RP=8;RA=0.585;ISTP=0;PRIOR=false;SR=9;AF=0.000750525;AC=5	.	.	.	0.000750525	.	.	.
2	139692158	TSD=AAAAAAAGAAAACCA;ASSESS=5;INTERNAL=LRP1B,TERMINATOR;SVTYPE=LINE1;SVLEN=6019;MEINFO=L1Ta1d,0,6019,+;DIFF=0.05:n1-2,g67t,t231c,t254a,n293-6019;LP=9;RP=1;RA=3.17;ISTP=0;PRIOR=false;SR=13;AF=0.000150105;AC=1	.	.	.	0.000150105	.	.	.
2	141079108	TSD=AAACCCACACTTTCTT;ASSESS=5;INTERNAL=NM_018557,INTRONIC;SVTYPE=LINE1;SVLEN=6018;MEINFO=L1Ta,1,6019,-;DIFF=0.1:n1-5574,n5648,n5684,n5735,n5737,a5741c,n5748,n5759,a5763c,n5765,n5769,n5772,n5778,n5780,n5782,n5784;LP=67;RP=92;RA=-0.457;ISTP=0;PRIOR=false;SR=76	0.000998403	0.00358166	.	0.00330231	.	.	.
2	141189365	TSD=AAAGACATTTCAGTTCTG;ASSESS=5;INTERNAL=NM_018557,INTRONIC;SVTYPE=LINE1;SVLEN=6018;MEINFO=L1Ta1d,1,6019,+;DIFF=0.11:n541-6019;LP=52;RP=23;RA=1.177;ISTP=0;PRIOR=false;SR=31;GENE=LRP1B;AF=0.000599042;AC=3	0.000599042	.	.	0.00105074	.	.	.
2	142202664	TSD=AGAAGTGGAGTCTG;ASSESS=5;INTERNAL=null,null;SVTYPE=LINE1;SVLEN=6017;MEINFO=L1Ta1d,2,6019,+;DIFF=0.11:n1-2,t231c,t254a,n370-6019;LP=11;RP=13;RA=-0.241;ISTP=0;PRIOR=false;SR=9;AF=0.000199681;AC=1	0.000199681	.	.	.	.	.	.
2	143211382	TSD=AAGAAGGAAAGTG;ASSESS=5;INTERNAL=NM_018460,INTRONIC;SVTYPE=LINE1;SVLEN=6019;MEINFO=L1Ta1d,0,6019,+;DIFF=0.06:n99,t231c,t254a,n366,n369,n382,n385-386,n395,n408,n411-412,n414-416,n418,n421,n423-424,n432,n443,n454,n472-473,n476-477,n492-6019;LP=15;RP=1;RA=3.907;ISTP=0;PRIOR=false;SR=9;GENE=ARHGAP15;AF=0.000199681;AC=1	0.000199681	.	.	.	.	.	.
2	143253224	TSD=AAAAAGTTTGATGGA;ASSESS=5;INTERNAL=NM_018460,INTRONIC;SVTYPE=LINE1;SVLEN=6018;MEINFO=L1Ta1d,1,6019,+;DIFF=0.11:n1,t231c,t254a,n334-335,n343,n358,a423g,n486-6019;LP=3777;RP=5135;RA=-0.443;ISTP=0;PRIOR=false;SR=3709	0.242212	0.247851	0.255396	0.15686	0.222222	0.162326	.
2	143547410	TSD=AAAAGGAATCATTTTA;ASSESS=5;INTERNAL=NM_018460,INTRONIC;SVTYPE=LINE1;SVLEN=6018;MEINFO=L1Ta1d,1,6019,-;DIFF=0.1:n1-39,n552-6019;LP=8;RP=11;RA=-0.459;ISTP=0;PRIOR=false;SR=12	0.000199681	0.000716332	.	0.00105074	0.00793651	0.00694444	.
2	144011656	TSD=TAAAAAAAAAAAAAAAA;ASSESS=5;INTERNAL=GTDC1,INTRONIC;SVTYPE=LINE1;SVLEN=6017;MEINFO=L1Ta1d,1,6018,+;DIFF=0.02:n42-58,n135-6019;LP=1;RP=6;RA=-2.585;ISTP=0;PRIOR=false;SR=2	.	.	.	.	.	.	0.000906618
2	144613551	TSD=AAAAACAAAACAAAACA;ASSESS=5;INTERNAL=null,null;SVTYPE=LINE1;SVLEN=6019;MEINFO=L1Ta1d,0,6019,+;DIFF=0.1:n442-6019;LP=20;RP=10;RA=1;ISTP=0;PRIOR=false;SR=19;AF=0.000199681;AC=1	0.000199681	.	.	.	.	.	.
2	145616836	TSD=AAAAGTAATGGCAAA;ASSESS=5;INTERNAL=TEX41,TERMINATOR;SVTYPE=LINE1;SVLEN=6019;MEINFO=L1Ta1d,0,6019,+;DIFF=0.09:n1-2,t231c,t254a,n331-6019;LP=44;RP=37;RA=0.25;ISTP=0;PRIOR=false;SR=52;AF=0.000450315;AC=3	.	.	.	0.000450315	.	.	.
2	145623018	TSD=TAAATTTAATTTTC;ASSESS=5;INTERNAL=TEX41,TERMINATOR;SVTYPE=LINE1;SVLEN=6019;MEINFO=L1Ta1d,0,6019,-;DIFF=0.08:t231c,t254a,n359-6019;LP=19;RP=43;RA=-1.178;ISTP=0;PRIOR=false;SR=34;AF=0.000450315;AC=3	.	.	.	0.000450315	.	.	.
2	147669418	TSD=CCTTTTGTGACTTT;ASSESS=5;INTERNAL=null,null;SVTYPE=LINE1;SVLEN=6018;MEINFO=L1Ta1d,1,6019,-;DIFF=0.1:t231c,t254a,n480-6019;LP=5;RP=23;RA=-2.202;ISTP=0;PRIOR=false;SR=11;AF=0.000199681;AC=1	0.000199681	.	.	.	.	.	.
2	147937095	TSD=AAAATAAGACTATT;ASSESS=5;INTERNAL=NM_181742,INTRONIC;SVTYPE=LINE1;SVLEN=6017;MEINFO=L1Ambig,1,6018,-;DIFF=0.1:n1-774,g999a,c1029t,n1169-6019;LP=15;RP=10;RA=0.585;ISTP=0;PRIOR=false;SR=8;GENE=ORC4;AF=0.000199681;AC=1	0.000199681	.	.	.	.	.	.
2	148125056	TSD=AAGATTTAA;ASSESS=5;INTERNAL=NM_018328,INTRONIC;SVTYPE=LINE1;SVLEN=6018;MEINFO=L1Ambig,1,6019,+;DIFF=0.07:n1,i73g,t231c,t254a,g285a,n340-6019;LP=20;RP=4;RA=2.322;ISTP=0;PRIOR=false;SR=9;GENE=MBD5	.	.	.	0.00030021	0.00793651	.	.
2	149554826	TSD=AACAGTTACTTTCTT;ASSESS=5;INTERNAL=MMADHC,TERMINATOR;SVTYPE=LINE1;SVLEN=6018;MEINFO=L1Ta1d,1,6019,-;DIFF=0.09:n1,g152c,t231c,t254a,g394t,n434-6019;LP=9;RP=21;RA=-1.222;ISTP=0;PRIOR=false;SR=23;AF=0.000150105;AC=1	.	.	.	0.000150105	.	.	.
2	149621159	TSD=GGAAAGTTCATATATTTT;ASSESS=5;INTERNAL=NR_110240,INTRONIC;SVTYPE=LINE1;SVLEN=6017;MEINFO=L1Ta1d,2,6019,-;DIFF=0.12:n1-2,t231c,t254a,a423g,n517-6019;LP=16;RP=20;RA=-0.322;ISTP=0;PRIOR=false;SR=17	0.000199681	0.000716332	.	0.00030021	.	.	.
2	149662450	TSD=GAAATTTGATTAATA;ASSESS=5;INTERNAL=NR_110240,INTRONIC;SVTYPE=LINE1;SVLEN=6012;MEINFO=L1Ambig,7,6019,+;DIFF=0.1:n1-7,i72g,c72g,g156a,c157t,c205t,t231c,t254a,n296-317,c324a,g352a,n383,n466-6019;LP=38;RP=33;RA=0.204;ISTP=0;PRIOR=false;SR=31	0.00299521	0.00143266	.	0.00315221	.	0.00782609	.
2	150456093	TSD=AGAAAAATCAAGGCA;ASSESS=5;INTERNAL=null,null;SVTYPE=LINE1;SVLEN=6018;MEINFO=L1Ta1d,1,6019,+;DIFF=0.1:n1,g53a,c90t,t231c,t254a,c324a,n503-551,n594,n675-678,n706-6019;LP=23;RP=10;RA=1.202;ISTP=0;PRIOR=false;SR=22	0.000199681	0.000716332	.	.	.	.	.
2	150549363	TSD=TGAATGTAACTTTTT;ASSESS=5;INTERNAL=NR_110241,TERMINATOR;SVTYPE=LINE1;SVLEN=6015;MEINFO=L1Ta1d,4,6019,-;DIFF=0.04:n1-3,a195c,t231c,c251t,t254a,n272-6019;LP=5;RP=2;RA=1.322;ISTP=0;PRIOR=false;SR=3;AF=0.000199681;AC=1	0.000199681	.	.	.	.	.	.
2	150640174	TSD=AAAAAACTTGTACG;ASSESS=5;INTERNAL=NR_110244,TERMINATOR;SVTYPE=LINE1;SVLEN=6018;MEINFO=L1Ta1d,1,6019,+;DIFF=0.14:n1,t231c,t254a,n392-405,a423g,n435,n451,n624-6019;LP=17;RP=15;RA=0.181;ISTP=0;PRIOR=false;SR=9	0.000399361	0.000716332	.	.	.	.	.
2	151001595	TSD=CTGCATATTCTTTTAT;ASSESS=5;INTERNAL=null,null;SVTYPE=LINE1;SVLEN=6018;MEINFO=L1Ta1d,1,6019,-;DIFF=0.1:n1,t231c,t254a,n430,n472,n516,n518-6019;LP=11;RP=18;RA=-0.71;ISTP=0;PRIOR=false;SR=20	0.000199681	0.000716332	.	.	.	.	.
2	151097037	TSD=AAGAACATGTATCT;ASSESS=5;INTERNAL=RBM43,TERMINATOR;SVTYPE=LINE1;SVLEN=6015;MEINFO=L1Ta,4,6019,+;DIFF=0.08:n1-5713;LP=19;RP=12;RA=0.663;ISTP=0;PRIOR=false;SR=25;AF=0.00030021;AC=2	.	.	.	0.00030021	.	.	.
2	151713554	TSD=AAAAAAAATTTAGGC;ASSESS=5;INTERNAL=NEB,INTRONIC;SVTYPE=LINE1;SVLEN=6019;MEINFO=L1Ta1d,0,6019,+;DIFF=0.1:n1-2,t231c,t254a,n330-6019;LP=18;RP=7;RA=1.363;ISTP=0;PRIOR=false;SR=12;AF=0.000150105;AC=1	.	.	.	0.000150105	.	.	.
2	152846237	TSD=AGCTCTGTCTCTT;ASSESS=5;INTERNAL=ARL6IP6,TERMINATOR;SVTYPE=LINE1;SVLEN=6017;MEINFO=L1Ta,2,6019,-;DIFF=0.12:n1-5638,a6001t;LP=75;RP=84;RA=-0.163;ISTP=0;PRIOR=false;SR=73;AF=0.00090063;AC=6	.	.	.	0.00090063	.	.	.
2	153244091	TSD=GATTTTTGTTTGTTTTT;ASSESS=5;INTERNAL=null,null;SVTYPE=LINE1;SVLEN=6016;MEINFO=L1Ambig,3,6019,-;DIFF=0.04:n1-2,g38a,i72c,g83c,t153c,t231c,t254a,n264-6019;LP=1;RP=52;RA=-5.7;ISTP=0;PRIOR=false;SR=22	.	.	.	.	0.0238095	.	.
2	153388141	TSD=GCTTTCTCACTTCT;ASSESS=5;INTERNAL=null,null;SVTYPE=LINE1;SVLEN=6019;MEINFO=L1Ambig,0,6019,-;DIFF=0.08:n3,i73g,c115a,c143t,g167a,t231c,t254a,c257t,n351-402,n475,n552-6019;LP=5;RP=13;RA=-1.379;ISTP=0;PRIOR=false;SR=8;AF=0.000199681;AC=1	0.000199681	.	.	.	.	.	.
2	155393659	TSD=TACATATGTTTGTTTT;ASSESS=5;INTERNAL=null,null;SVTYPE=LINE1;SVLEN=6012;MEINFO=L1Ta1d,7,6019,-;DIFF=0.1:n1-7,g156t,t231c,t254a,c327t,n411,n485-6019;LP=6;RP=17;RA=-1.503;ISTP=0;PRIOR=false;SR=9;GENE=LOC105373699;AF=0.000199681;AC=1	0.000199681	.	.	.	.	.	.
2	155602195	TSD=AAGAATTGGTGGTTGG;ASSESS=5;INTERNAL=LINC01876,TERMINATOR;SVTYPE=LINE1;SVLEN=6019;MEINFO=L1Ambig,0,6019,+;DIFF=0.06:n11-12,i73g,g185t,n190,n192,g212c,t231c,c251t,t254a,n345-6019;LP=6;RP=10;RA=-0.737;ISTP=0;PRIOR=false;SR=17;AF=0.000150105;AC=1	.	.	.	0.000150105	.	.	.
2	155657745	TSD=GAAAAGAAAGGTTA;ASSESS=5;INTERNAL=null,null;SVTYPE=LINE1;SVLEN=6007;MEINFO=L1Ta1d,12,6019,+;DIFF=0.11:n1-12,c144g,t231c,t254a,n486,n493,n547,a577c,n585,n611-6019;LP=20;RP=7;RA=1.515;ISTP=0;PRIOR=false;SR=12;GENE=LOC107985953;AF=0.000199681;AC=1	0.000199681	.	.	.	.	.	.
2	155671336	TSD=AAAAAAAAAAAAGAAAGAAAGAAAGAA;ASSESS=5;INTERNAL=null,null;SVTYPE=LINE1;SVLEN=6012;MEINFO=L1Ta,7,6019,+;DIFF=0.1:n1-5610,a5837c;LP=4380;RP=2898;RA=0.596;ISTP=0;PRIOR=false;SR=2206	0.220447	0.212034	0.226619	0.0716001	0.285714	0.243056	.
2	156625015	TSD=GACAATCATAGTCTT;ASSESS=5;INTERNAL=null,null;SVTYPE=LINE1;SVLEN=6012;MEINFO=L1Ta1d,7,6019,-;DIFF=0.11:n1-7,t231c,t254a,c327t,c377a,a422t,n445,n448,n477-6019;LP=11;RP=15;RA=-0.447;ISTP=0;PRIOR=false;SR=13;AF=0.000199681;AC=1	0.000199681	.	.	.	.	.	.
2	157051045	TSD=AAGATTGGTGGAAGAG;ASSESS=5;INTERNAL=null,null;SVTYPE=LINE1;SVLEN=6019;MEINFO=L1Ta1d,0,6019,+;DIFF=0.12:t231c,n342-406,n568-6019;LP=18;RP=12;RA=0.585;ISTP=0;PRIOR=false;SR=11	0.00139776	0.000716332	.	0.00495347	.	0.000868056	.
2	157163438	TSD=AAAACTAAACCAGCTT;ASSESS=5;INTERNAL=null,null;SVTYPE=LINE1;SVLEN=6016;MEINFO=L1Ambig,3,6019,+;DIFF=0.1:n1-3,g61a,i73g,t231c,t254a,g352a,n376-6019;LP=133;RP=82;RA=0.698;ISTP=0;PRIOR=false;SR=81	0.00359425	0.00501433	.	0.0115581	.	0.000868056	.
2	158208310	TSD=GTATGTGTTGATTTTTCT;ASSESS=5;INTERNAL=NM_001301684,INTRONIC;SVTYPE=LINE1;SVLEN=6019;MEINFO=L1Ta1d,0,6019,-;DIFF=0.1:t231c,t254a,c324a,n429-6019;LP=7;RP=12;RA=-0.778;ISTP=0;PRIOR=false;SR=9;GENE=CCDC148-AS1;AF=0.000199681;AC=1	0.000199681	.	.	.	.	.	.
2	158326439	TSD=TATGTTTATGGTTTT;ASSESS=5;INTERNAL=CCDC148,INTRONIC;SVTYPE=LINE1;SVLEN=6007;MEINFO=L1Ta1d,12,6019,-;DIFF=0.08:n1-12,t231c,n418-6019;LP=22;RP=27;RA=-0.295;ISTP=0;PRIOR=false;SR=23;AF=0.00030021;AC=2	.	.	.	0.00030021	.	.	.
2	158621251	TSD=null;ASSESS=1;INTERNAL=PKP4,5_UTR;SVTYPE=LINE1;SVLEN=6010;MEINFO=L1Ta1d,8,6018,-;DIFF=0.09:n1-7,c37t,g61a,t231c,n254-6019;LP=15;RP=13;RA=0.206;ISTP=-1;PRIOR=false;SR=0	.	.	.	.	.	.	1.00735e-05
2	159459857	TSD=CACAAAACCTGTCTT;ASSESS=5;INTERNAL=NM_001289975,INTRONIC;SVTYPE=LINE1;SVLEN=6015;MEINFO=L1Ambig,4,6019,-;DIFF=0.09:n1-5332,n5386,c5391t,n5483-5629,a5653c,n5660,n5696,a5712g,n5740,n5745,n5752,n5849,a5931g,a6009g;LP=32;RP=59;RA=-0.883;ISTP=0;PRIOR=false;SR=54	0.00119808	0.002149	.	.	.	.	.
2	159872370	TSD=null;ASSESS=3;INTERNAL=NM_002349,INTRONIC;SVTYPE=LINE1;SVLEN=6015;MEINFO=L1Ta1d,4,6019,-;DIFF=0.12:n1-3,g67t,t231c,t254a,g328a,a373g,g483a,n500-6019;LP=13;RP=18;RA=-0.469;ISTP=-1;PRIOR=false;SR=10;GENE=LY75-CD302;AF=0.000199681;AC=1	0.000199681	.	.	.	.	.	.
2	160187424	TSD=AGTTTTACCTGTT;ASSESS=5;INTERNAL=ITGB6,INTRONIC;SVTYPE=LINE1;SVLEN=6017;MEINFO=L1Ta1d,2,6019,-;DIFF=0.09:n1,t231c,n443-6019;LP=7;RP=14;RA=-1;ISTP=0;PRIOR=false;SR=14;AF=0.000150105;AC=1	.	.	.	0.000150105	.	.	.
2	161028922	TSD=CATTAAAGGTTTTT;ASSESS=5;INTERNAL=null,null;SVTYPE=LINE1;SVLEN=6019;MEINFO=L1Ta1d,0,6019,-;DIFF=0.09:n460,n463-6019;LP=7;RP=17;RA=-1.28;ISTP=0;PRIOR=false;SR=12;AF=0.000199681;AC=1	0.000199681	.	.	.	.	.	.
2	161494076	TSD=AGAAACTCTT;ASSESS=5;INTERNAL=NR_077058,TERMINATOR;SVTYPE=LINE1;SVLEN=6019;MEINFO=L1Ta1d,0,6019,-;DIFF=0.16:g38c,n582-6019;LP=35;RP=44;RA=-0.33;ISTP=0;PRIOR=false;SR=44;AF=0.000399361;AC=2	0.000399361	.	.	0.00150105	.	.	.
2	161892411	TSD=GGAAATCTATATTTTT;ASSESS=5;INTERNAL=NM_001178016,INTRONIC;SVTYPE=LINE1;SVLEN=6018;MEINFO=L1Ta1d,1,6019,-;DIFF=0.12:g167a,t231c,t254a,c324a,n429-6019;LP=11;RP=17;RA=-0.628;ISTP=0;PRIOR=false;SR=17	0.000798722	0.000716332	.	0.000750525	0.015873	0.00434783	.
2	163432003	TSD=TAAAATTATATGA;ASSESS=5;INTERNAL=null,null;SVTYPE=LINE1;SVLEN=6018;MEINFO=L1Ambig,1,6019,+;DIFF=0.11:n1,a30g,g38a,c54t,i73g,t153c,g156c,t231c,t254a,g313a,c351g,g352a,g378a,t465a,n488-6019;LP=346;RP=184;RA=0.911;ISTP=0;PRIOR=false;SR=335	0.0249601	0.0157593	0.00494604	0.00495347	.	0.00868056	.
2	163483090	TSD=TAGACTTCTTTTTT;ASSESS=5;INTERNAL=FIGN,TERMINATOR;SVTYPE=LINE1;SVLEN=6016;MEINFO=L1Ta1d,3,6019,-;DIFF=0.09:n1-2,n5-7,a9t,g210c,t231c,t254a,g318t,a343c,n358,a388g,c390a,t450a,t451a,c455a,n505-506,n509,n518-6019;LP=16;RP=50;RA=-1.644;ISTP=0;PRIOR=false;SR=35;AF=0.000450315;AC=3	.	.	.	0.000450315	.	.	.
2	163734902	TSD=null;ASSESS=3;INTERNAL=FIGN,INTRONIC;SVTYPE=LINE1;SVLEN=6015;MEINFO=L1Ta1d,3,6018,-;DIFF=0.05:n1-2,g61a,n187-6019;LP=4;RP=16;RA=-2;ISTP=-1;PRIOR=false;SR=4	.	.	.	.	.	.	2.01471e-05
2	163873281	TSD=TCAGTATATTTTATTT;ASSESS=5;INTERNAL=null,null;SVTYPE=LINE1;SVLEN=6018;MEINFO=L1Ta1d,1,6019,-;DIFF=0.07:t231c,t254a,c269t,n396-6019;LP=4;RP=14;RA=-1.807;ISTP=0;PRIOR=false;SR=4	0.00259585	.	.	0.0123086	.	0.00173611	.
2	164277129	TSD=null;ASSESS=3;INTERNAL=GRB14,TERMINATOR;SVTYPE=LINE1;SVLEN=6019;MEINFO=L1Ta1d,0,6019,-;DIFF=0.05:n341-6019;LP=1;RP=13;RA=-3.7;ISTP=-1;PRIOR=false;SR=4;AF=0.000150105;AC=1	.	.	.	0.000150105	.	.	.
2	164669238	TSD=TCAATAGCCTTTGTT;ASSESS=5;INTERNAL=null,null;SVTYPE=LINE1;SVLEN=6019;MEINFO=L1Ta1d,0,6019,-;DIFF=0.12:g210c,t231c,t254a,n512-6019;LP=30;RP=40;RA=-0.415;ISTP=0;PRIOR=false;SR=29	0.000599042	0.00143266	.	0.00180126	.	0.00173611	.
2	166235403	TSD=CAAGTAAGTTTC;ASSESS=5;INTERNAL=NM_002977,INTRONIC;SVTYPE=LINE1;SVLEN=6017;MEINFO=L1Ambig,2,6019,-;DIFF=0.09:i73g,g156a,c160t,t231c,t254a,g313a,g352a,n452-474,a580g,t616a,n625-6019;LP=3;RP=22;RA=-2.874;ISTP=0;PRIOR=false;SR=18	0.000199681	0.000716332	.	.	.	.	.
2	167454679	TSD=AGAAATAATAAAGCCT;ASSESS=5;INTERNAL=null,null;SVTYPE=LINE1;SVLEN=6019;MEINFO=L1Ta,0,6019,+;DIFF=0.11:n1-5549,n5584,n5605,n5655,n5678,n5692,n5700-5709,n5973,n5986;LP=52;RP=35;RA=0.571;ISTP=0;PRIOR=false;SR=50	0.00179712	0.002149	.	0.00135095	.	.	.
2	167882009	TSD=CCAAGCCAGAATTTTTT;ASSESS=5;INTERNAL=NR_131227,INTRONIC;SVTYPE=LINE1;SVLEN=6019;MEINFO=L1Ta1d,0,6019,-;DIFF=0.05:t231c,t254a,n322-6019;LP=1;RP=33;RA=-5.044;ISTP=0;PRIOR=false;SR=21	.	.	.	.	.	0.00260417	.
2	168517604	TSD=TCTCTACTGTTTT;ASSESS=5;INTERNAL=CERS6,INTRONIC;SVTYPE=LINE1;SVLEN=6016;MEINFO=L1Ta,2,6018,+;DIFF=0.09:n1-5567;LP=29;RP=44;RA=-0.601;ISTP=0;PRIOR=false;SR=19;AF=0.000450315;AC=3	.	.	.	0.000450315	.	.	.
2	169109720	TSD=AAAGAAGTCCTGGA;ASSESS=5;INTERNAL=DHRS9,TERMINATOR;SVTYPE=LINE1;SVLEN=6019;MEINFO=L1Ta1d,0,6019,+;DIFF=0.04:n1-2,t231c,t254a,c327t,n362-6019;LP=11;RP=1;RA=3.459;ISTP=0;PRIOR=false;SR=2;AF=0.000150105;AC=1	.	.	.	0.000150105	.	.	.
2	169353691	TSD=AAGAATTTCCTG;ASSESS=5;INTERNAL=LRP2,INTRONIC;SVTYPE=LINE1;SVLEN=6019;MEINFO=L1Ta1d,0,6019,+;DIFF=0.1:t231c,t254a,c324a,n404-6019;LP=31;RP=11;RA=1.495;ISTP=0;PRIOR=false;SR=25;AF=0.00030021;AC=2	.	.	.	0.00030021	.	.	.
2	170959133	TSD=CCCGGCTAATTGTTT;ASSESS=5;INTERNAL=NM_015530,INTRONIC;SVTYPE=LINE1;SVLEN=6018;MEINFO=L1Ta1d,1,6019,-;DIFF=0.13:g53a,c90t,t231c,t254a,c324a,n408-415,n460,c529a,n566-6019;LP=33;RP=40;RA=-0.278;ISTP=0;PRIOR=false;SR=32;GENE=GORASP2;AF=0.000399361;AC=2	0.000399361	.	.	.	.	.	.
2	172315268	TSD=dGC;ASSESS=5;INTERNAL=null,null;SVTYPE=LINE1;SVLEN=6015;MEINFO=L1Ambig,3,6018,-;DIFF=0.04:n1-2,i73g,t149g,t153c,g156a,t231c,g244t,t254a,n309-335,a341g,n350,g352a,a373g,a423g,c463a,n487-6019;LP=11;RP=6;RA=0.874;ISTP=0;PRIOR=false;SR=31	.	.	.	.	.	0.0182292	.
2	174209301	TSD=TTCATCCTGATATCT;ASSESS=5;INTERNAL=NM_001011708,INTRONIC;SVTYPE=LINE1;SVLEN=6017;MEINFO=L1Ta1d,2,6019,-;DIFF=0.04:n1,g184c,g210c,t231c,t254a,n298,g356t,n465-6019;LP=1;RP=10;RA=-3.322;ISTP=0;PRIOR=false;SR=6;GENE=OLA1;AF=0.000199681;AC=1	0.000199681	.	.	.	.	.	.
2	174494531	TSD=null;ASSESS=3;INTERNAL=null,null;SVTYPE=LINE1;SVLEN=6018;MEINFO=L1Ta1d,1,6019,-;DIFF=0.06:n1,t231c,t254a,n354-6019;LP=1;RP=28;RA=-4.807;ISTP=-1;PRIOR=false;SR=15	.	.	.	.	.	0.00173611	.
2	174494544	TSD=CACCTTAACTCTT;ASSESS=5;INTERNAL=null,null;SVTYPE=LINE1;SVLEN=6018;MEINFO=L1Ta1d,1,6019,-;DIFF=0.11:n1-16,t231c,t254a,n492-6019;LP=12;RP=26;RA=-1.115;ISTP=0;PRIOR=false;SR=7	0.000399361	0.000716332	.	0.00150105	.	.	.
2	174568354	TSD=GAAATTGAAAACAGG;ASSESS=5;INTERNAL=NM_001077269,INTRONIC;SVTYPE=LINE1;SVLEN=6016;MEINFO=L1Ta1d,2,6018,-;DIFF=0.13:n1,t231c,t254a,n409,n411,n457-495,n507,n646-6019;LP=23;RP=12;RA=0.939;ISTP=0;PRIOR=false;SR=21;GENE=WIPF1;AF=0.000199681;AC=1	0.000199681	.	.	.	.	.	.
2	174697726	TSD=CTACTGTTTTCTTCT;ASSESS=5;INTERNAL=null,null;SVTYPE=LINE1;SVLEN=6016;MEINFO=L1Ta1d,3,6019,-;DIFF=0.06:n1,n333,n336,n397,n494-586,n737-6019;LP=1;RP=19;RA=-4.248;ISTP=0;PRIOR=false;SR=10;AF=0.000199681;AC=1	0.000199681	.	.	.	.	.	.
2	176804392	TSD=CACTTTCTT;ASSESS=5;INTERNAL=LINC01117,TERMINATOR;SVTYPE=LINE1;SVLEN=6018;MEINFO=L1Ambig,1,6019,-;DIFF=0.09:n1,i73g,t231c,c251t,t254a,c327t,n352-6019;LP=64;RP=74;RA=-0.209;ISTP=0;PRIOR=false;SR=78;AF=0.00090063;AC=6	.	.	.	0.00090063	.	.	.
2	176810537	TSD=null;ASSESS=4;INTERNAL=null,null;SVTYPE=LINE1;SVLEN=6018;MEINFO=L1Ta1d,1,6019,+;DIFF=0.05:n1,g38c,n315-6019;LP=17;RP=1;RA=4.087;ISTP=-1;PRIOR=false;SR=15	0.328275	.	.	0.227559	.	0.118924	.
2	176954779	TSD=AAACAATCCATCATC;ASSESS=5;INTERNAL=null,null;SVTYPE=LINE1;SVLEN=6017;MEINFO=L1Ta1d,2,6019,+;DIFF=0.11:n1-2,t231c,t254a,a423g,n438-6019;LP=21;RP=10;RA=1.07;ISTP=0;PRIOR=false;SR=10;AF=0.000199681;AC=1	0.000199681	.	.	.	.	.	.
2	181547035	TSD=GATCTAATGGTTTTA;ASSESS=5;INTERNAL=NR_027689,INTRONIC;SVTYPE=LINE1;SVLEN=6008;MEINFO=L1Ta1d,11,6019,-;DIFF=0.09:n1-11,t231c,t254a,n524-6019;LP=9;RP=19;RA=-1.078;ISTP=0;PRIOR=false;SR=20;GENE=CERKL;AF=0.000199681;AC=1	0.000199681	.	.	.	.	.	.
2	181745342	TSD=CAGTATTTT;ASSESS=5;INTERNAL=null,null;SVTYPE=LINE1;SVLEN=6019;MEINFO=L1Ta1d,0,6019,+;DIFF=0.14:t231c,c445t,t450c,n487-6019;LP=23;RP=10;RA=1.202;ISTP=0;PRIOR=false;SR=15;AF=0.000199681;AC=1	0.000199681	.	.	0.000150105	.	.	.
2	184499090	TSD=AAGATGTTGTACTTGA;ASSESS=5;INTERNAL=null,null;SVTYPE=LINE1;SVLEN=6019;MEINFO=L1Ta1d,0,6019,+;DIFF=0.1:n371-6019;LP=15;RP=25;RA=-0.737;ISTP=0;PRIOR=false;SR=21;AF=0.000199681;AC=1	0.000199681	.	.	.	.	.	.
2	186169897	TSD=GAAAAATTAGAATTTA;ASSESS=5;INTERNAL=null,null;SVTYPE=LINE1;SVLEN=6014;MEINFO=L1Ta1d,5,6019,-;DIFF=0.07:n1-4,a52t,t231c,t254a,c369t,n521-6019;LP=4;RP=9;RA=-1.17;ISTP=0;PRIOR=false;SR=13	0.000599042	0.000716332	.	.	.	.	.
2	186446881	TSD=CAAAAAATAAAATTCT;ASSESS=5;INTERNAL=null,null;SVTYPE=LINE1;SVLEN=6019;MEINFO=L1Ta1d,0,6019,-;DIFF=0.14:n559-6019;LP=15;RP=17;RA=-0.181;ISTP=0;PRIOR=false;SR=16;GENE=LOC105373785;AF=0.000199681;AC=1	0.000199681	.	.	.	.	.	.
2	186713986	TSD=null;ASSESS=3;INTERNAL=NM_177454,INTRONIC;SVTYPE=LINE1;SVLEN=6014;MEINFO=L1Ta,4,6018,+;DIFF=0.1:n1-5592,n5776,n5913;LP=25;RP=12;RA=1.059;ISTP=0;PRIOR=false;SR=4;GENE=FAM171B;AF=0.000199681;AC=1	0.000199681	.	.	.	.	.	.
2	186860642	TSD=AAACCAATATCTTTA;ASSESS=5;INTERNAL=null,null;SVTYPE=LINE1;SVLEN=6019;MEINFO=L1Ta1d,0,6019,-;DIFF=0.11:n1-2,t231c,t254a,n264-272,a423g,n424,n472-6019;LP=10;RP=15;RA=-0.585;ISTP=0;PRIOR=false;SR=9;AF=0.000199681;AC=1	0.000199681	.	.	.	.	.	.
2	187251677	TSD=null;ASSESS=4;INTERNAL=null,null;SVTYPE=LINE1;SVLEN=6016;MEINFO=L1Ta1d,3,6019,+;DIFF=0.04:n1-2,t231c,n252-253,t254a,n279-279,n286-287,n308-6019;LP=9;RP=1;RA=3.17;ISTP=-1;PRIOR=false;SR=5	.	.	.	.	.	0.000868056	.
2	187797404	TSD=AAAAATTAGCCAGGC;ASSESS=5;INTERNAL=null,null;SVTYPE=LINE1;SVLEN=6018;MEINFO=L1Ta1d,1,6019,+;DIFF=0.11:n1,t231c,t254a,c327t,n418-6019;LP=17;RP=9;RA=0.918;ISTP=0;PRIOR=false;SR=10	0.000199681	0.000716332	.	.	.	.	.
2	188964367	TSD=null;ASSESS=3;INTERNAL=null,null;SVTYPE=LINE1;SVLEN=6019;MEINFO=L1Ta1d,0,6019,-;DIFF=0.05:c144g,t231c,t254a,n304,n333-6019;LP=1;RP=18;RA=-4.17;ISTP=-1;PRIOR=false;SR=3	.	.	.	.	.	0.000869565	.
2	188964383	TSD=TCCTCACATATTTTTC;ASSESS=5;INTERNAL=NM_000090,PROMOTER;SVTYPE=LINE1;SVLEN=6019;MEINFO=L1Ta1d,0,6019,-;DIFF=0.13:c144g,t231c,t254a,n385-422,n612-6019;LP=8;RP=16;RA=-1;ISTP=0;PRIOR=false;SR=7;AF=0.000199681;AC=1	0.000199681	.	.	0.00060042	.	.	.
2	189045282	TSD=null;ASSESS=4;INTERNAL=COL5A2,INTRONIC;SVTYPE=LINE1;SVLEN=6019;MEINFO=L1Ambig,0,6019,+;DIFF=0.03:n1-5555,n5632-6019;LP=5;RP=2;RA=1.322;ISTP=-1;PRIOR=false;SR=2	.	.	.	.	.	.	1.00786e-05
2	189612967	TSD=TAAAGTTGTTCTTTC;ASSESS=5;INTERNAL=null,null;SVTYPE=LINE1;SVLEN=6018;MEINFO=L1Ta1d,1,6019,-;DIFF=0.07:n1,n99,t231c,t254a,n295-6019;LP=4;RP=6;RA=-0.585;ISTP=0;PRIOR=false;SR=2;AF=0.000199681;AC=1	0.000199681	.	.	.	.	.	.
2	190613988	TSD=TCTTTCCTTTTTCT;ASSESS=5;INTERNAL=null,null;SVTYPE=LINE1;SVLEN=6018;MEINFO=L1Ambig,1,6019,-;DIFF=0.1:n1-3,i73g,c115a,g167a,t231c,t254a,c257t,g352a,n430-6019;LP=1609;RP=2614;RA=-0.7;ISTP=0;PRIOR=false;SR=2793	0.127596	0.110315	0.217626	0.0592915	0.119048	0.203993	.
2	190932607	TSD=null;ASSESS=3;INTERNAL=GLS,INTRONIC;SVTYPE=LINE1;SVLEN=6018;MEINFO=L1Ambig,1,6019,-;DIFF=0.05:n72,n85-6019;LP=2;RP=8;RA=-2;ISTP=-1;PRIOR=false;SR=1	.	.	.	.	.	.	1.00784e-05
2	191082904	TSD=AAAAATGTAAACAC;ASSESS=5;INTERNAL=STAT4,INTRONIC;SVTYPE=LINE1;SVLEN=6019;MEINFO=L1Ta1d,0,6019,+;DIFF=0.1:c144g,g165c,t231c,t254a,g364c,n369-6019;LP=128;RP=65;RA=0.978;ISTP=0;PRIOR=false;SR=104;AF=0.00120084;AC=8	.	.	.	0.00120084	.	.	.
2	191918808	TSD=null;ASSESS=4;INTERNAL=null,null;SVTYPE=LINE1;SVLEN=6019;MEINFO=L1Ta1d,0,6019,+;DIFF=0.06:c144g,t231c,t254a,n351-6019;LP=18;RP=1;RA=4.17;ISTP=-1;PRIOR=false;SR=8	.	.	.	.	.	0.000868056	.
2	191948611	TSD=GGAATTTTTTCTTTT;ASSESS=5;INTERNAL=NM_016192,TERMINATOR;SVTYPE=LINE1;SVLEN=6017;MEINFO=L1Ta1d,2,6019,-;DIFF=0.09:n1-2,t25c,t231c,t254a,n362-430,g520a,n580-6019;LP=7;RP=21;RA=-1.585;ISTP=0;PRIOR=false;SR=13;GENE=TMEFF2;AF=0.000199681;AC=1	0.000199681	.	.	0.000150105	.	.	.
2	192050595	TSD=ACATTTGAAGCTTTT;ASSESS=5;INTERNAL=NM_016192,INTRONIC;SVTYPE=LINE1;SVLEN=6017;MEINFO=L1Ta1d,2,6019,-;DIFF=0.12:n1-2,t231c,t254a,n484-6019;LP=231;RP=388;RA=-0.748;ISTP=0;PRIOR=false;SR=246	0.00539137	0.0136103	.	0.015761	.	0.00347222	.
2	193995675	TSD=null;ASSESS=4;INTERNAL=null,null;SVTYPE=LINE1;SVLEN=6019;MEINFO=L1Ta1d,0,6019,+;DIFF=0.05:c144g,t231c,t254a,n291-6019;LP=14;RP=1;RA=3.807;ISTP=-1;PRIOR=false;SR=4	.	.	.	.	.	0.000868056	.
2	194744988	TSD=AAAAAGTAAATAACA;ASSESS=5;INTERNAL=LINC01790,INTRONIC;SVTYPE=LINE1;SVLEN=6012;MEINFO=L1Ta1d,7,6019,+;DIFF=0.09:n1-7,t231c,t254a,c327t,n421-6019;LP=30;RP=9;RA=1.737;ISTP=0;PRIOR=false;SR=24;AF=0.00030021;AC=2	.	.	.	0.00030021	.	.	.
2	194802572	TSD=AATAAATATAAGTCAC;ASSESS=5;INTERNAL=null,null;SVTYPE=LINE1;SVLEN=6014;MEINFO=L1Ambig,5,6019,+;DIFF=0.13:n1-5,i73g,c115a,g167a,t231c,t254a,c257t,n352-434,g498a,g524a,n594-6019;LP=20;RP=14;RA=0.515;ISTP=0;PRIOR=false;SR=17;GENE=LOC105376755;AF=0.000199681;AC=1	0.000199681	.	.	0.000150105	.	.	.
2	194868483	TSD=AAAAATTGTTTTGCA;ASSESS=5;INTERNAL=null,null;SVTYPE=LINE1;SVLEN=6019;MEINFO=L1Ta1d,0,6019,+;DIFF=0.12:t254a,c482a,n565-6019;LP=37;RP=18;RA=1.04;ISTP=0;PRIOR=false;SR=33	0.000599042	0.00143266	.	0.0030021	.	.	.
2	195855399	TSD=CAACCTACGTCACTT;ASSESS=5;INTERNAL=NM_018897,INTRONIC;SVTYPE=LINE1;SVLEN=6017;MEINFO=L1Ta,2,6019,-;DIFF=0.12:n1-5419,n5483,n5555,n5570-5610,a5699t,c5950a;LP=21;RP=17;RA=0.305;ISTP=0;PRIOR=false;SR=20;GENE=DNAH7;AF=0.000199681;AC=1	0.000199681	.	.	.	.	.	.
2	195997728	TSD=null;ASSESS=3;INTERNAL=DNAH7,INTRONIC;SVTYPE=LINE1;SVLEN=6008;MEINFO=L1Ta1d,10,6018,+;DIFF=0.08:n1-9,t231c,t254a,n439-6019;LP=32;RP=9;RA=1.83;ISTP=0;PRIOR=false;SR=2;AF=0.00030021;AC=2	.	.	.	0.00030021	.	.	.
2	196216345	TSD=null;ASSESS=3;INTERNAL=NM_020760,INTRONIC;SVTYPE=LINE1;SVLEN=6010;MEINFO=L1Ta,8,6018,+;DIFF=0.1:n1-5465,n5615-5671,c5899t;LP=13;RP=9;RA=0.531;ISTP=0;PRIOR=false;SR=8	.	0.000716332	.	.	.	.	.
2	196216360	TSD=AAAAAAGAGAATGTC;ASSESS=5;INTERNAL=NM_020760,INTRONIC;SVTYPE=LINE1;SVLEN=6010;MEINFO=L1Ta1d,8,6018,-;DIFF=0.12:n1-7,c37t,g61a,t231c,t254a,g483a,n538-6019;LP=60;RP=27;RA=1.152;ISTP=0;PRIOR=false;SR=12;GENE=HECW2;AF=0.000599042;AC=3	0.000599042	.	.	0.00120084	.	.	.
2	196644827	TSD=AAGAGTAAAAAGAA;ASSESS=5;INTERNAL=NM_001080539,INTRONIC;SVTYPE=LINE1;SVLEN=6016;MEINFO=L1Ambig,3,6019,+;DIFF=0.11:n1-3,c72t,t231c,t254a,c324a,n385-411,c529a,n604-6019;LP=13;RP=9;RA=0.531;ISTP=0;PRIOR=false;SR=8;GENE=CCDC150;AF=0.000199681;AC=1	0.000199681	.	.	.	.	.	.
2	197921904	TSD=TGTTTCTATATTTTCT;ASSESS=5;INTERNAL=NM_006226,INTRONIC;SVTYPE=LINE1;SVLEN=6019;MEINFO=L1Ta,0,6019,-;DIFF=0.11:n1-5550,c5788t,c5800a;LP=16;RP=9;RA=0.83;ISTP=0;PRIOR=false;SR=15;GENE=PLCL1;AF=0.000199681;AC=1	0.000199681	.	.	.	.	.	.
2	197928043	TSD=GATGGTATGATTTTTTT;ASSESS=5;INTERNAL=NM_006226,INTRONIC;SVTYPE=LINE1;SVLEN=6017;MEINFO=L1Ta1d,2,6019,-;DIFF=0.07:n1-2,t25c,t231c,t254a,n336,n387-6019;LP=2;RP=9;RA=-2.17;ISTP=0;PRIOR=false;SR=3;GENE=PLCL1;AF=0.000199681;AC=1	0.000199681	.	.	.	.	.	.
2	198915190	TSD=AGAAAGTATATAATCT;ASSESS=5;INTERNAL=null,null;SVTYPE=LINE1;SVLEN=6017;MEINFO=L1Ta1d,2,6019,+;DIFF=0.13:n1-2,g184c,g210c,t231c,t254a,n451,n498-6019;LP=1278;RP=703;RA=0.862;ISTP=0;PRIOR=false;SR=882	0.0391374	0.0501433	0.0503597	0.0225158	0.0714286	0.115451	.
2	199260069	TSD=AGAATTTTTTGGTTTACA;ASSESS=5;INTERNAL=NM_001172509,TERMINATOR;SVTYPE=LINE1;SVLEN=6019;MEINFO=L1Ta1d,0,6019,+;DIFF=0.1:n1-2,t231c,t254a,c327t,n417-6019;LP=11;RP=7;RA=0.652;ISTP=0;PRIOR=false;SR=11	0.000199681	0.000716332	.	.	.	.	.
2	199341166	TSD=AAGGTTGG;ASSESS=5;INTERNAL=SATB2,INTRONIC;SVTYPE=LINE1;SVLEN=6017;MEINFO=L1Ta,1,6018,+;DIFF=0.09:n1-5629,n5640,a5647c,n5661,a5837c;LP=22;RP=35;RA=-0.67;ISTP=0;PRIOR=false;SR=22;AF=0.000450315;AC=3	.	.	.	0.000450315	.	.	.
2	199559465	TSD=CATAATTTTCATTTT;ASSESS=5;INTERNAL=null,null;SVTYPE=LINE1;SVLEN=6019;MEINFO=L1Ta1d,0,6019,-;DIFF=0.06:n1-2,t231c,t254a,n409,n437-6019;LP=1;RP=18;RA=-4.17;ISTP=0;PRIOR=false;SR=12;AF=0.000199681;AC=1	0.000199681	.	.	.	.	.	.
2	199584195	TSD=AAAAGAAAACTGAG;ASSESS=5;INTERNAL=null,null;SVTYPE=LINE1;SVLEN=6019;MEINFO=L1Ambig,0,6019,+;DIFF=0.1:i73g,t231c,c251t,t254a,g352a,n475,n507,n540-6019;LP=26;RP=7;RA=1.893;ISTP=0;PRIOR=false;SR=14;AF=0.000199681;AC=1	0.000199681	.	.	.	.	.	.
2	199662714	TSD=AAGAAAAAAGAA;ASSESS=5;INTERNAL=LINC01877,TERMINATOR;SVTYPE=LINE1;SVLEN=6019;MEINFO=L1Ta,0,6019,+;DIFF=0.07:n1-5733,t5808a,g5809a,g5833a,g5926a,c5928a,t5933a,g5935a,g5956a,t5962a,n6002-6003,a6006g;LP=9;RP=5;RA=0.848;ISTP=0;PRIOR=false;SR=8;AF=0.000150105;AC=1	.	.	.	0.000150105	.	.	.
2	199716158	TSD=AAGATTGAGCAGCACTG;ASSESS=5;INTERNAL=null,null;SVTYPE=LINE1;SVLEN=6018;MEINFO=L1Ta1d,1,6019,+;DIFF=0.1:n385-538,n541,n689-6019;LP=15;RP=14;RA=0.1;ISTP=0;PRIOR=false;SR=12	.	0.000716332	.	0.000150105	.	.	.
2	203569153	TSD=AGAAAACCTAGGTTAAG;ASSESS=5;INTERNAL=null,null;SVTYPE=LINE1;SVLEN=6017;MEINFO=L1Ta1d,2,6019,+;DIFF=0.13:n1,t231c,t254a,c324a,c529a,n568,c590a,n615-6019;LP=18;RP=10;RA=0.848;ISTP=0;PRIOR=false;SR=18;AF=0.000199681;AC=1	0.000199681	.	.	0.00120084	.	.	.
2	203628891	TSD=AAGGTGGGTGCTCCT;ASSESS=5;INTERNAL=null,null;SVTYPE=LINE1;SVLEN=6018;MEINFO=L1Ta1d,1,6019,+;DIFF=0.13:n1,t231c,t254a,n472-6019;LP=21;RP=10;RA=1.07;ISTP=0;PRIOR=false;SR=12;AF=0.000199681;AC=1	0.000199681	.	.	.	.	.	.
2	205076071	TSD=GAGAACTTTCTTTTCTTT;ASSESS=5;INTERNAL=NM_205863,INTRONIC;SVTYPE=LINE1;SVLEN=6017;MEINFO=L1Ambig,2,6019,-;DIFF=0.1:n1,i73g,t231c,c251t,t254a,n316,g352a,n419-6019;LP=29;RP=32;RA=-0.142;ISTP=0;PRIOR=false;SR=26;GENE=PARD3B;AF=0.000399361;AC=2	0.000399361	.	.	.	.	.	.
2	205841925	TSD=GAAAGATTTGCCCCC;ASSESS=5;INTERNAL=null,null;SVTYPE=LINE1;SVLEN=6018;MEINFO=L1Ta1d,1,6019,+;DIFF=0.12:n1-3,c491t,n566-6019;LP=20;RP=15;RA=0.415;ISTP=0;PRIOR=false;SR=15	0.000199681	0.000716332	.	.	.	.	.
2	206509460	TSD=TGTATTTTCTTTTTTCTTTTTTTT;ASSESS=5;INTERNAL=NM_003812,INTRONIC;SVTYPE=LINE1;SVLEN=6019;MEINFO=L1Ta1d,0,6019,-;DIFF=0.1:n1-2,t231c,t254a,n339-381,n383,n409,n450-451,g520a,n532-6019;LP=19;RP=32;RA=-0.752;ISTP=0;PRIOR=false;SR=21;GENE=ADAM23;AF=0.000399361;AC=2	0.000399361	.	.	.	.	.	.
2	207483166	TSD=AGAAAATATTCAAAAATA;ASSESS=5;INTERNAL=null,null;SVTYPE=LINE1;SVLEN=6019;MEINFO=L1Ta1d,0,6019,+;DIFF=0.1:t231c,t254a,n596-6019;LP=23;RP=1;RA=4.524;ISTP=0;PRIOR=false;SR=11	0.000399361	0.000716332	.	.	.	.	.
2	208304125	TSD=null;ASSESS=2;INTERNAL=PIKFYVE,INTRONIC;SVTYPE=LINE1;SVLEN=6017;MEINFO=L1Ta1d,1,6018,+;DIFF=0.04:t107a,n141-6019;LP=1;RP=8;RA=-3;ISTP=-1;PRIOR=false;SR=0	.	.	.	.	.	.	1.00735e-05
2	208627487	TSD=AAAATAGAAAGGCATC;ASSESS=5;INTERNAL=null,null;SVTYPE=LINE1;SVLEN=6019;MEINFO=L1Ta1d,0,6019,+;DIFF=0.12:t231c,t254a,a423g,n469-6019;LP=20;RP=13;RA=0.621;ISTP=0;PRIOR=false;SR=16	0.000399361	0.000716332	.	.	.	.	.
2	208758909	TSD=TTTTTTTTTGTTTTTT;ASSESS=5;INTERNAL=null,null;SVTYPE=LINE1;SVLEN=6010;MEINFO=L1Ambig,8,6018,+;DIFF=0.05:n1-5231,g5236a,g5239a,a5256c,a5258g,g5268a,t5316a,t5325c,c5391t,g5420a,t5455a,g5474a,t5535g,g5538t,n5587-6019;LP=21;RP=78;RA=-1.893;ISTP=0;PRIOR=false;SR=83	.	.	.	.	.	0.0078125	.
2	208797961	TSD=null;ASSESS=3;INTERNAL=null,null;SVTYPE=LINE1;SVLEN=6015;MEINFO=L1Ta1d,3,6018,+;DIFF=0.09:n1-2,t231c,t254a,c327t,n492-6019;LP=17;RP=5;RA=1.766;ISTP=0;PRIOR=false;SR=3;GENE=LOC101927960;AF=0.000199681;AC=1	0.000199681	.	.	.	.	.	.
2	209315153	TSD=TACCATGGTTTTTT;ASSESS=5;INTERNAL=null,null;SVTYPE=LINE1;SVLEN=6017;MEINFO=L1Ta1d,2,6019,-;DIFF=0.13:n1-3,t231c,t254a,c327t,n579-6019;LP=17;RP=65;RA=-1.935;ISTP=0;PRIOR=false;SR=39	0.000399361	0.002149	.	.	.	.	.
2	210225977	TSD=GACATTTC;ASSESS=5;INTERNAL=ACADL,PROMOTER;SVTYPE=LINE1;SVLEN=6019;MEINFO=L1Ta1d,0,6019,-;DIFF=0.11:g210c,t231c,t254a,a388g,n495-6019;LP=22;RP=34;RA=-0.628;ISTP=0;PRIOR=false;SR=27;AF=0.00030021;AC=2	.	.	.	0.00030021	.	.	.
2	210264389	TSD=AAGATTTCCTAACTTCAGGG;ASSESS=5;INTERNAL=MYL1,TERMINATOR;SVTYPE=LINE1;SVLEN=6016;MEINFO=L1Ambig,3,6019,+;DIFF=0.07:n1-3,i73g,c115a,g167a,t231c,t254a,c257t,n328-6019;LP=10;RP=1;RA=3.322;ISTP=0;PRIOR=false;SR=5;AF=0.000150105;AC=1	.	.	.	0.000150105	.	.	.
2	210397654	TSD=GGATCCATATCTTTT;ASSESS=5;INTERNAL=NR_110605,INTRONIC;SVTYPE=LINE1;SVLEN=6016;MEINFO=L1Ambig,3,6019,-;DIFF=0.08:n1-3,i73g,c115a,c143t,g167a,t231c,t254a,c257t,n282-287,g352a,n389-403,n487-6019;LP=10;RP=14;RA=-0.485;ISTP=0;PRIOR=false;SR=14;GENE=LANCL1-AS1	.	.	.	.	0.00793651	.	.
2	213153588	TSD=AAAAACTGAACCTAAG;ASSESS=5;INTERNAL=IKZF2,PROMOTER;SVTYPE=LINE1;SVLEN=6018;MEINFO=L1Ta1d,1,6019,+;DIFF=0.09:t231c,t254a,c308t,n378-6019;LP=43;RP=26;RA=0.726;ISTP=0;PRIOR=false;SR=45;AF=0.00060042;AC=4	.	.	.	0.00060042	.	.	.
2	213408482	TSD=null;ASSESS=3;INTERNAL=NR_047659,INTRONIC;SVTYPE=LINE1;SVLEN=6016;MEINFO=L1Ta1d,3,6019,-;DIFF=0.05:n1,t231c,t254a,n323-6019;LP=1;RP=16;RA=-4;ISTP=-1;PRIOR=false;SR=7;GENE=SPAG16;AF=0.000199681;AC=1	0.000199681	.	.	.	.	.	.
2	213412506	TSD=AACTTTT;ASSESS=5;INTERNAL=NR_047659,INTRONIC;SVTYPE=LINE1;SVLEN=6017;MEINFO=L1Ta1d,2,6019,-;DIFF=0.1:n1-2,t231c,t254a,n431-6019;LP=13;RP=11;RA=0.241;ISTP=0;PRIOR=false;SR=6	0.000998403	0.000716332	.	0.000150105	.	.	.
2	214068719	TSD=AAAAGCTGAATTTTT;ASSESS=5;INTERNAL=NR_047659,INTRONIC;SVTYPE=LINE1;SVLEN=6019;MEINFO=L1Ta1d,0,6019,+;DIFF=0.11:t151a,t231c,t254a,c324a,n451,n461,n465,n472,n475,n494,n508,n511,n516,n527,n529,n539,n571-6019;LP=25;RP=14;RA=0.837;ISTP=0;PRIOR=false;SR=18	0.000399361	0.000716332	.	.	.	0.00173611	.
2	214451658	TSD=AAAGGCAGCAAA;ASSESS=5;INTERNAL=VWC2L,INTRONIC;SVTYPE=LINE1;SVLEN=6015;MEINFO=L1Ta1d,3,6018,+;DIFF=0.07:n1-2,t231c,t254a,n351-6019;LP=47;RP=12;RA=1.97;ISTP=0;PRIOR=false;SR=6;AF=0.000450315;AC=3	.	.	.	0.000450315	.	.	.
2	214477869	TSD=TAAAATGTCACTTTTG;ASSESS=5;INTERNAL=VWC2L,INTRONIC;SVTYPE=LINE1;SVLEN=6018;MEINFO=L1Ta,1,6019,+;DIFF=0.09:n1-5662,c5682t,g5847a;LP=41;RP=45;RA=-0.134;ISTP=0;PRIOR=false;SR=61;AF=0.000450315;AC=3	.	.	.	0.000450315	.	.	.
2	214956825	TSD=GCATTTTTC;ASSESS=5;INTERNAL=NR_103740,INTRONIC;SVTYPE=LINE1;SVLEN=6018;MEINFO=L1Ta1d,1,6019,-;DIFF=0.08:n1,t231c,t254a,n470-6019;LP=1;RP=16;RA=-4;ISTP=0;PRIOR=false;SR=15;GENE=LOC101928103;AF=0.000199681;AC=1	0.000199681	.	.	.	.	.	.
2	216028382	TSD=AAAAATACAAAAAATTAG;ASSESS=5;INTERNAL=null,null;SVTYPE=LINE1;SVLEN=6017;MEINFO=L1Ta1d,2,6019,+;DIFF=0.08:n1-2,t231c,t254a,n393-6019;LP=26;RP=4;RA=2.7;ISTP=0;PRIOR=false;SR=9;AF=0.000199681;AC=1	0.000199681	.	.	.	.	.	.
2	216994074	TSD=CTTATTTTCTT;ASSESS=5;INTERNAL=null,null;SVTYPE=LINE1;SVLEN=6016;MEINFO=L1Ta1d,3,6019,-;DIFF=0.1:n1,c144g,t231c,t254a,n436-6019;LP=8;RP=21;RA=-1.392;ISTP=0;PRIOR=false;SR=18;GENE=LOC101928278;AF=0.000199681;AC=1	0.000199681	.	.	.	.	.	.
2	217649996	TSD=TGTTGTTTTATTTTT;ASSESS=5;INTERNAL=NR_026597,INTRONIC;SVTYPE=LINE1;SVLEN=6019;MEINFO=L1Ta1d,0,6019,-;DIFF=0.12:n1-16,g61c,t231c,t254a,t384g,n423-430,c558a,n606,g631c,g633c,n651-6019;LP=27;RP=49;RA=-0.86;ISTP=0;PRIOR=false;SR=42	0.000399361	0.002149	.	.	.	.	.
2	218681588	TSD=AAGACGGTAATTTAT;ASSESS=5;INTERNAL=STK36,INTRONIC;SVTYPE=LINE1;SVLEN=6019;MEINFO=L1Ta1d,0,6019,-;DIFF=0.1:t231c,n394,n396,c445t,n513-6019;LP=16;RP=24;RA=-0.585;ISTP=0;PRIOR=false;SR=19;AF=0.00060042;AC=4	.	.	.	0.00060042	.	.	.
2	219931599	TSD=dGAAAAA;ASSESS=5;INTERNAL=MIR4268,PROMOTER;SVTYPE=LINE1;SVLEN=6013;MEINFO=L1Ambig,5,6018,+;DIFF=0.06:n1-4,g27c,g38a,g61a,i73g,t149g,t153c,g154a,c155t,g161c,t231c,t254a,i256g,g313a,c327g,t350c,n370-6019;LP=28;RP=49;RA=-0.807;ISTP=0;PRIOR=false;SR=40;AF=0.000150105;AC=1	.	.	.	0.000150105	.	.	.
2	219958432	TSD=CTGAGTTAGTTTTTTTCT;ASSESS=5;INTERNAL=null,null;SVTYPE=LINE1;SVLEN=6014;MEINFO=L1Ta,5,6019,-;DIFF=0.12:n1-5574,a5642t,t6012g;LP=15;RP=12;RA=0.322;ISTP=0;PRIOR=false;SR=9	0.000199681	0.000716332	.	.	.	.	.
2	220374248	TSD=GCCATCTTTGTTT;ASSESS=5;INTERNAL=MIR4268,PROMOTER;SVTYPE=LINE1;SVLEN=6018;MEINFO=L1Ta1d,1,6019,-;DIFF=0.13:n1-13,c37a,c186a,t231c,t254a,c255t,c363t,n473-6019;LP=16;RP=18;RA=-0.17;ISTP=0;PRIOR=false;SR=16;AF=0.000150105;AC=1	.	.	.	0.000150105	.	.	.
2	220529499	TSD=null;ASSESS=3;INTERNAL=null,null;SVTYPE=LINE1;SVLEN=6015;MEINFO=L1Ambig,3,6018,+;DIFF=0.09:n1-2,c21t,i73g,g120a,c143t,t149g,g165a,c170a,c197t,n221-310,n312-315,a423g,g446a,c651t,g672c,n697-6019;LP=7;RP=5;RA=0.485;ISTP=0;PRIOR=false;SR=1	.	0.0730659	.	.	.	.	.
2	221918151	TSD=AAAAGTTAATTTAG;ASSESS=5;INTERNAL=null,null;SVTYPE=LINE1;SVLEN=6018;MEINFO=L1Ambig,1,6019,+;DIFF=0.07:n1-3,i73g,c115a,g167a,t231c,t254a,c257t,n291,g352a,g498a,g524a,n597-6019;LP=12;RP=3;RA=2;ISTP=0;PRIOR=false;SR=10;GENE=LOC105373900;AF=0.000199681;AC=1	0.000199681	.	.	.	.	.	.
2	222456654	TSD=AAGAGGCATAAAGG;ASSESS=5;INTERNAL=NM_152386,INTRONIC;SVTYPE=LINE1;SVLEN=6019;MEINFO=L1Ta1d,0,6019,+;DIFF=0.09:c144g,t231c,t254a,n351-353,n368,n573-6019;LP=33;RP=2;RA=4.044;ISTP=0;PRIOR=false;SR=26;GENE=SGPP2;AF=0.000399361;AC=2	0.000399361	.	.	.	.	.	.
2	222515121	TSD=TGCAATATTATCTT;ASSESS=5;INTERNAL=SGPP2,INTRONIC;SVTYPE=LINE1;SVLEN=6019;MEINFO=L1Ta1d,0,6019,-;DIFF=0.1:g38c,n388-6019;LP=48;RP=47;RA=0.03;ISTP=0;PRIOR=false;SR=66;AF=0.000450315;AC=3	.	.	.	0.000450315	.	.	.
2	222677600	TSD=AGAAAGGTACTAATGAG;ASSESS=5;INTERNAL=NM_058165,INTRONIC;SVTYPE=LINE1;SVLEN=6019;MEINFO=L1Ta1d,0,6019,+;DIFF=0.11:g167a,t231c,t254a,c324a,n424-6019;LP=14;RP=10;RA=0.485;ISTP=0;PRIOR=false;SR=16;GENE=MOGAT1;AF=0.000199681;AC=1	0.000199681	.	.	.	.	.	.
2	223141843	TSD=null;ASSESS=3;INTERNAL=null,null;SVTYPE=LINE1;SVLEN=6014;MEINFO=L1Ta1d,4,6018,+;DIFF=0.11:n1-3,g318a,n445,n490-6019;LP=19;RP=8;RA=1.248;ISTP=0;PRIOR=false;SR=3	.	0.000716332	.	.	.	.	.
2	223141853	TSD=AAGAATTTCC;ASSESS=5;INTERNAL=null,null;SVTYPE=LINE1;SVLEN=6014;MEINFO=L1Ta,4,6018,+;DIFF=0.13:n1-5506,n5648,n5679,t5693g,n5707,n5738,n5757,n5764;LP=23;RP=18;RA=0.354;ISTP=0;PRIOR=false;SR=11;AF=0.000199681;AC=1	0.000199681	.	.	.	.	.	.
2	223165105	TSD=AATTTCTGTATTTTTA;ASSESS=5;INTERNAL=null,null;SVTYPE=LINE1;SVLEN=6017;MEINFO=L1Ta1d,2,6019,-;DIFF=0.1:n1,g38c,n321-332,n335,n346,n350,n448,n552,n589,n620-6019;LP=25;RP=47;RA=-0.911;ISTP=0;PRIOR=false;SR=29;AF=0.000399361;AC=2	0.000399361	.	.	.	.	.	.
2	223353576	TSD=AAGACGTATGTCTTTT;ASSESS=5;INTERNAL=null,null;SVTYPE=LINE1;SVLEN=6018;MEINFO=L1Ta1d,1,6019,-;DIFF=0.13:c144g,t231c,t254a,n561-6019;LP=8;RP=21;RA=-1.392;ISTP=0;PRIOR=false;SR=12	.	0.00143266	.	.	.	.	.
2	227216580	TSD=AGAAAGAAAGGAAGGTAG;ASSESS=5;INTERNAL=NM_000091,INTRONIC;SVTYPE=LINE1;SVLEN=6019;MEINFO=L1Ta1d,0,6019,+;DIFF=0.08:g210c,t231c,t254a,a388g,n393-6019;LP=15;RP=4;RA=1.907;ISTP=0;PRIOR=false;SR=5	0.000199681	0.000716332	.	.	.	.	.
2	227959038	TSD=GAAAATTACCTGTCAA;ASSESS=5;INTERNAL=null,null;SVTYPE=LINE1;SVLEN=6019;MEINFO=L1Ta1d,0,6019,+;DIFF=0.13:c144g,t231c,t254a,n401-6019;LP=18;RP=14;RA=0.363;ISTP=0;PRIOR=false;SR=15;AF=0.000199681;AC=1	0.000199681	.	.	.	.	.	.
2	227982069	TSD=TTTTTTTTTTTTTTTT;ASSESS=5;INTERNAL=SPHKAP,INTRONIC;SVTYPE=LINE1;SVLEN=6014;MEINFO=L1Ambig,4,6018,-;DIFF=0.07:n1-4451,c4458t,n4528-4577,a4602g,a4622g,n4630-4634,n4711-4817,c4866t,n4887-6019;LP=16;RP=15;RA=0.093;ISTP=0;PRIOR=false;SR=19	.	.	.	.	.	.	0.0660421
2	228538355	TSD=CAAGCTGGGAACTGTT;ASSESS=5;INTERNAL=null,null;SVTYPE=LINE1;SVLEN=6018;MEINFO=L1Ta1d,1,6019,-;DIFF=0.11:g61a,t231c,t254a,n483-6019;LP=7;RP=21;RA=-1.585;ISTP=0;PRIOR=false;SR=14;GENE=LOC101928765;AF=0.000199681;AC=1	0.000199681	.	.	0.00405284	.	.	.
2	228708790	TSD=AATAATTAATTTTA;ASSESS=5;INTERNAL=null,null;SVTYPE=LINE1;SVLEN=6017;MEINFO=L1Ta1d,2,6019,-;DIFF=0.14:n1-6,t231c,t254a,c327t,t465a,n575-6019;LP=7;RP=13;RA=-0.893;ISTP=0;PRIOR=false;SR=12;GENE=LOC105373920;AF=0.000599042;AC=3	0.000599042	.	0.00494604	.	.	.	.
2	229296984	TSD=GAAAAAGAATGCC;ASSESS=5;INTERNAL=PID1,PROMOTER;SVTYPE=LINE1;SVLEN=6019;MEINFO=L1Ta,0,6019,+;DIFF=0.1:n1-5653,n5687,t5707a,n5724,g5740t,c5748t;LP=9;RP=15;RA=-0.737;ISTP=0;PRIOR=false;SR=15;AF=0.000150105;AC=1	.	.	.	0.000150105	.	.	.
2	229441294	TSD=AAAAATTCAATCAA;ASSESS=5;INTERNAL=NM_139072,INTRONIC;SVTYPE=LINE1;SVLEN=6013;MEINFO=L1Ambig,6,6019,+;DIFF=0.1:n1-17,i73g,c115a,c143t,g167a,t231c,t254a,c257t,g352a,t490g,n500-6019;LP=16;RP=5;RA=1.678;ISTP=0;PRIOR=false;SR=10	0.00119808	0.000716332	0.000899281	0.00195137	0.015873	0.00520833	.
2	229476843	TSD=AAAA;ASSESS=5;INTERNAL=NM_139072,INTRONIC;SVTYPE=LINE1;SVLEN=6019;MEINFO=L1Ambig,0,6019,+;DIFF=0.11:n1-5650,g5686a,a5712g,a5931g;LP=2795;RP=1961;RA=0.511;ISTP=0;PRIOR=false;SR=2351	0.121406	0.109599	0.0750899	0.0725008	0.166667	0.144965	.
2	232170758	TSD=AGAAAACAATGAGCTA;ASSESS=5;INTERNAL=NM_001257281,INTRONIC;SVTYPE=LINE1;SVLEN=6016;MEINFO=L1Ta1d,3,6019,+;DIFF=0.05:n1-3,t82g,t231c,t254a,t290g,n334-6019;LP=12;RP=1;RA=3.585;ISTP=0;PRIOR=false;SR=9	.	.	.	.	.	0.000868056	.
2	234048193	TSD=AAAAGTATCTATT;ASSESS=5;INTERNAL=NM_006944,PROMOTER;SVTYPE=LINE1;SVLEN=6019;MEINFO=L1Ta1d,0,6019,-;DIFF=0.1:n1-2,t231c,n248,n250,n253,t254a,n267-267,n287,n289,n298,n409-6019;LP=16;RP=27;RA=-0.755;ISTP=0;PRIOR=false;SR=22;AF=0.000399361;AC=2	0.000399361	.	.	0.00180126	.	.	.
2	234051183	TSD=null;ASSESS=4;INTERNAL=NM_006944,INTRONIC;SVTYPE=LINE1;SVLEN=6007;MEINFO=L1Ta1d,12,6019,+;DIFF=0.02:n1-12,n25,n52,n68,g210c,t231c,t254a,n259-310,a388g,n461-6019;LP=4;RP=1;RA=2;ISTP=-1;PRIOR=false;SR=2;GENE=SPP2;AF=0.000199681;AC=1	0.000199681	.	.	.	.	.	.
2	234416318	TSD=AAAAGTTCACATTA;ASSESS=5;INTERNAL=ARL4C,TERMINATOR;SVTYPE=LINE1;SVLEN=6017;MEINFO=L1Ta1d,2,6019,+;DIFF=0.07:n1-2,t231c,t254a,n338-6019;LP=9;RP=9;RA=0;ISTP=0;PRIOR=false;SR=6;AF=0.000150105;AC=1	.	.	.	0.000150105	.	.	.
2	235188267	TSD=GAAAAATATTTCATTCA;ASSESS=5;INTERNAL=null,null;SVTYPE=LINE1;SVLEN=6015;MEINFO=L1Ta1d,4,6019,+;DIFF=0.13:n1-4,n103-120,c144g,t231c,t254a,n590-6019;LP=18;RP=14;RA=0.363;ISTP=0;PRIOR=false;SR=17	0.00279553	0.000716332	.	.	.	0.000868056	.
2	235837804	TSD=AATAAATTTATTACTG;ASSESS=5;INTERNAL=NM_001037131,INTRONIC;SVTYPE=LINE1;SVLEN=6019;MEINFO=L1Ta,0,6019,+;DIFF=0.1:n1-5351,n5502-5512,t5535g,g5538c,n5804,n5813,a6006g;LP=14;RP=8;RA=0.807;ISTP=0;PRIOR=false;SR=15	0.000199681	0.000716332	.	.	.	.	.
2	237741849	TSD=AAAAAAAAAAGAAAAAAGAAAAA;ASSESS=5;INTERNAL=NM_001137551,INTRONIC;SVTYPE=LINE1;SVLEN=6019;MEINFO=L1Ta1d,0,6019,+;DIFF=0.11:n413-433,n537,n584-725,n727-728,n731,n733,a735c,n754-755,n757,n761,n766,n768,n770,n779,n781,n786,n789,n793,n799,n805,n812,n814,n820,n826,n876-6019;LP=21;RP=9;RA=1.222;ISTP=0;PRIOR=false;SR=9	.	0.000716332	.	.	.	.	.
2	237765460	TSD=AAAAAAAAAAAAAAAAAAAAAA;ASSESS=5;INTERNAL=LRRFIP1,5_UTR;SVTYPE=LINE1;SVLEN=6011;MEINFO=L1Ambig,7,6018,-;DIFF=0.07:n1-3992,g4038a,g4096c,c4125t,n4153-6019;LP=8;RP=15;RA=-0.907;ISTP=0;PRIOR=false;SR=14	.	.	.	.	.	.	0.179046
2	238220530	TSD=GTGATCCTCCTGTT;ASSESS=5;INTERNAL=NR_026925,TERMINATOR;SVTYPE=LINE1;SVLEN=6019;MEINFO=L1Ta1d,0,6019,-;DIFF=0.05:c144g,t231c,t254a,n338-6019;LP=3;RP=29;RA=-3.273;ISTP=0;PRIOR=false;SR=23	.	.	.	.	.	0.000868056	.
3	2219768	TSD=AAGCATTATTTTTT;ASSESS=5;INTERNAL=NM_175607,INTRONIC;SVTYPE=LINE1;SVLEN=6018;MEINFO=L1Ambig,1,6019,-;DIFF=0.1:n1,i73g,t231c,t254a,g352a,n502-6019;LP=52;RP=99;RA=-0.929;ISTP=0;PRIOR=false;SR=71	0.00239617	0.00358166	.	0.0118583	0.00793651	.	.
3	2494559	TSD=GTAAATGTCTCTT;ASSESS=5;INTERNAL=NM_001206955,INTRONIC;SVTYPE=LINE1;SVLEN=6019;MEINFO=L1Ta1d,0,6019,-;DIFF=0.08:c144g,t231c,t254a,n334-415,n566-6019;LP=21;RP=29;RA=-0.466;ISTP=0;PRIOR=false;SR=31	0.000399361	0.00143266	.	.	.	.	.
3	2890905	TSD=AAAAACTTCCTAAAAATAG;ASSESS=5;INTERNAL=NM_001206955,INTRONIC;SVTYPE=LINE1;SVLEN=6018;MEINFO=L1Ambig,1,6019,+;DIFF=0.11:i73g,t231c,c251t,t254a,c327t,n343,n346,g352a,n354-355,n372,n383,n414,n427,n440-6019;LP=17;RP=12;RA=0.503;ISTP=0;PRIOR=false;SR=15;GENE=CNTN4;AF=0.000199681;AC=1	0.000199681	.	.	.	.	.	.
3	4021809	TSD=AAAATTAATCTAGGA;ASSESS=5;INTERNAL=null,null;SVTYPE=LINE1;SVLEN=6019;MEINFO=L1Ta1d,0,6019,+;DIFF=0.09:n315,n390-466,n617-6019;LP=27;RP=24;RA=0.17;ISTP=0;PRIOR=false;SR=31;GENE=LOC102723512;AF=0.000399361;AC=2	0.000399361	.	.	0.000450315	.	.	.
3	4092428	TSD=CAAAGAATCCT;ASSESS=5;INTERNAL=SETMAR,PROMOTER;SVTYPE=LINE1;SVLEN=6005;MEINFO=L1Ta1d,14,6019,+;DIFF=0.05:n1-14,t231c,t254a,n320-322,n324,n339,n353,n356,g389c,n397-6019;LP=15;RP=2;RA=2.907;ISTP=0;PRIOR=false;SR=13;AF=0.000150105;AC=1	.	.	.	0.000150105	.	.	.
3	4133624	TSD=AGAAAAATGTGAAAAGAGAG;ASSESS=5;INTERNAL=null,null;SVTYPE=LINE1;SVLEN=6019;MEINFO=L1Ta1d,0,6019,+;DIFF=0.08:c37a,t231c,g252c,t254a,g285a,c363t,n436-6019;LP=24;RP=13;RA=0.885;ISTP=0;PRIOR=false;SR=6;GENE=SUMF1;AF=0.000199681;AC=1	0.000199681	.	.	0.00120084	.	.	.
3	6711056	TSD=CATTTTTGGAGTCTTT;ASSESS=5;INTERNAL=NR_110123,INTRONIC;SVTYPE=LINE1;SVLEN=6015;MEINFO=L1Ambig,4,6019,-;DIFF=0.11:n1-5586,g5641t,c5859t,c5920a,a5931g,a5934g;LP=493;RP=804;RA=-0.706;ISTP=0;PRIOR=false;SR=732	0.0291534	0.030086	.	0.0950165	0.0238095	0.0130208	.
3	7318597	TSD=AACAAAAATCAGA;ASSESS=5;INTERNAL=NM_000844,INTRONIC;SVTYPE=LINE1;SVLEN=6017;MEINFO=L1Ta1d,2,6019,+;DIFF=0.12:n1-2,t231c,t254a,n409,n434,n462,n464,t465a,n469-469,n483,n490,n497,n519-6019;LP=17;RP=15;RA=0.181;ISTP=0;PRIOR=false;SR=13;GENE=GRM7;AF=0.000199681;AC=1	0.000199681	.	.	.	.	.	.
3	8206608	TSD=AATAAAGA;ASSESS=5;INTERNAL=null,null;SVTYPE=LINE1;SVLEN=6018;MEINFO=L1Ta1d,1,6019,+;DIFF=0.08:n1,t231c,t254a,n395,n406-6019;LP=19;RP=4;RA=2.248;ISTP=0;PRIOR=false;SR=14;AF=0.000199681;AC=1	0.000199681	.	.	.	.	.	.
3	10440769	TSD=AGAAAGCAGCAGACCG;ASSESS=5;INTERNAL=NM_001001331,INTRONIC;SVTYPE=LINE1;SVLEN=6019;MEINFO=L1Ta,0,6019,+;DIFF=0.1:n1-5563,n5653,c5682t,n5813,n5849;LP=13;RP=10;RA=0.379;ISTP=0;PRIOR=false;SR=15;GENE=ATP2B2;AF=0.000199681;AC=1	0.000199681	.	.	0.00105074	.	.	.
3	16943877	TSD=TTGTGCAAATAACTT;ASSESS=5;INTERNAL=NM_015184,INTRONIC;SVTYPE=LINE1;SVLEN=6019;MEINFO=L1Ta1d,0,6019,-;DIFF=0.11:n1-2,t231c,t254a,n423,n508,n513-6019;LP=13;RP=21;RA=-0.692;ISTP=0;PRIOR=false;SR=18;GENE=PLCL2;AF=0.000199681;AC=1	0.000199681	.	.	.	.	.	.
3	17310730	TSD=AAGAAAAAAATTTATCAT;ASSESS=5;INTERNAL=NM_014744,INTRONIC;SVTYPE=LINE1;SVLEN=6019;MEINFO=L1Ta1d,0,6019,+;DIFF=0.12:c144g,t231c,t254a,n476-6019;LP=18;RP=7;RA=1.363;ISTP=0;PRIOR=false;SR=9;GENE=TBC1D5;AF=0.000199681;AC=1	0.000199681	.	.	.	.	.	.
3	17879080	TSD=AATAAAATGTAGCCTTTTG;ASSESS=5;INTERNAL=null,null;SVTYPE=LINE1;SVLEN=6018;MEINFO=L1Ta,1,6019,+;DIFF=0.11:n1-5631,a5642g,c5682t,n6004;LP=16;RP=8;RA=1;ISTP=0;PRIOR=false;SR=11	0.000599042	0.000716332	.	0.000750525	.	.	.
3	18191706	TSD=CTATTTCTGTGTATTTC;ASSESS=5;INTERNAL=NM_001257177,INTRONIC;SVTYPE=LINE1;SVLEN=6017;MEINFO=L1Ta1d,2,6019,-;DIFF=0.04:n1-2,t231c,n254-6019;LP=1;RP=17;RA=-4.087;ISTP=0;PRIOR=false;SR=3	.	.	.	.	.	0.000869565	.
3	18588960	TSD=TTGAAACCTATTTC;ASSESS=5;INTERNAL=null,null;SVTYPE=LINE1;SVLEN=6019;MEINFO=L1Ta1d,0,6019,-;DIFF=0.1:g210c,t231c,g232c,t254a,n428-6019;LP=25;RP=38;RA=-0.604;ISTP=0;PRIOR=false;SR=55;AF=0.000399361;AC=2	0.000399361	.	.	.	.	.	.
3	18905178	TSD=TAAAAATGATGGAAAG;ASSESS=5;INTERNAL=null,null;SVTYPE=LINE1;SVLEN=6018;MEINFO=L1Ta1d,1,6019,+;DIFF=0.12:n1,t231c,t254a,n368,n383-384,n411,n574-6019;LP=49;RP=21;RA=1.222;ISTP=0;PRIOR=false;SR=34;AF=0.000399361;AC=2	0.000399361	.	.	0.00030021	.	.	.
3	19839540	TSD=AAAAAAATATACAAAA;ASSESS=5;INTERNAL=null,null;SVTYPE=LINE1;SVLEN=6019;MEINFO=L1Ta1d,0,6019,+;DIFF=0.08:t231c,t254a,n425-6019;LP=37;RP=10;RA=1.888;ISTP=0;PRIOR=false;SR=19	0.00119808	0.00143266	0.0130396	0.00315221	0.0238095	0.0130208	.
3	20049041	TSD=CTAATTTTTGTATTTTT;ASSESS=5;INTERNAL=NM_003884,INTRONIC;SVTYPE=LINE1;SVLEN=6017;MEINFO=L1Ambig,2,6019,-;DIFF=0.1:n1-3,i73g,c115a,c143t,g167a,t231c,t254a,c257t,g352a,g397c,n440-6019;LP=377;RP=575;RA=-0.609;ISTP=0;PRIOR=false;SR=455	0.0245607	0.02149	0.00269784	0.00375263	0.00793651	0.0269097	.
3	20222908	TSD=null;ASSESS=2;INTERNAL=null,null;SVTYPE=LINE1;SVLEN=6010;MEINFO=L1Ta1d,8,6018,+;DIFF=0.1:n1-7,t231c,t254a,c327t,t430c,n618-6019;LP=1;RP=21;RA=-4.392;ISTP=-1;PRIOR=false;SR=0	.	0.000716332	.	.	.	.	.
3	20222921	TSD=TGTCATCTTTTTTT;ASSESS=5;INTERNAL=null,null;SVTYPE=LINE1;SVLEN=6010;MEINFO=L1Ta1d,8,6018,-;DIFF=0.08:n1-7,t231c,t254a,c327t,t430c,n575-6019;LP=1;RP=35;RA=-5.129;ISTP=0;PRIOR=false;SR=4;GENE=LOC107986067;AF=0.000399361;AC=2	0.000399361	.	.	.	.	.	.
3	23065131	TSD=AAAAAAAAATCACATG;ASSESS=5;INTERNAL=null,null;SVTYPE=LINE1;SVLEN=6019;MEINFO=L1Ambig,0,6019,+;DIFF=0.11:n1-3,i73g,c84a,c160t,t231c,t254a,g313a,g352a,c363t,n432-6019;LP=52;RP=28;RA=0.893;ISTP=0;PRIOR=false;SR=39	0.00159744	0.002149	.	0.00510357	.	.	.
3	23411679	TSD=AATGCCCTAG;ASSESS=5;INTERNAL=NM_152653,INTRONIC;SVTYPE=LINE1;SVLEN=6015;MEINFO=L1Ta,4,6019,+;DIFF=0.1:n1-5603;LP=7;RP=12;RA=-0.778;ISTP=0;PRIOR=false;SR=8	0.000199681	0.000716332	.	.	.	.	.
3	23517926	TSD=TACTTCAGATTTCTTTT;ASSESS=5;INTERNAL=NM_152653,INTRONIC;SVTYPE=LINE1;SVLEN=6018;MEINFO=L1Ambig,1,6019,-;DIFF=0.09:n1-3,i73g,c164t,t231c,t254a,g352a,n452-6019;LP=10;RP=19;RA=-0.926;ISTP=0;PRIOR=false;SR=13;GENE=UBE2E2;AF=0.000199681;AC=1	0.000199681	.	.	.	.	.	.
3	23834077	TSD=AAAAAATAAATAAAAAGAAATAAA;ASSESS=5;INTERNAL=NM_001202476,INTRONIC;SVTYPE=LINE1;SVLEN=6017;MEINFO=L1Ta1d,2,6019,+;DIFF=0.11:n1-2,t231c,t254a,n385-6019;LP=19;RP=13;RA=0.547;ISTP=0;PRIOR=false;SR=9;GENE=UBE2E1;AF=0.000199681;AC=1	0.000199681	.	.	.	.	.	.
3	24037694	TSD=GAGAACTCT;ASSESS=5;INTERNAL=NR1D2,TERMINATOR;SVTYPE=LINE1;SVLEN=6017;MEINFO=L1Ta1d,2,6019,-;DIFF=0.08:n1,c21t,n231,n245,n251,n254-259,n266,n268,n274-275,n277-280,n284,n288,n290,n294,n307-308,n317,n320-338,n340-341,n346,n348,t350g,n352-358,n360-366,n368-372,a373t,n374-374,n378,n381,n383-386,n399,n401,n408-409,n413,n415-416,n418,n421,n424,n426,n442-444,n453-454,n461,n471,n482,n484,a486g,n490-60…	.	.	.	0.00030021	.	.	.
3	24238485	TSD=AAGACTGCAGC;ASSESS=5;INTERNAL=NM_000461,INTRONIC;SVTYPE=LINE1;SVLEN=6016;MEINFO=L1Ta1d,3,6019,+;DIFF=0.07:n1-3,t188c,t231c,t254a,n454-6019;LP=20;RP=1;RA=4.322;ISTP=0;PRIOR=false;SR=13	.	0.000716332	.	.	.	.	.
3	24903450	TSD=AAAAGTTCTTTCTTT;ASSESS=5;INTERNAL=null,null;SVTYPE=LINE1;SVLEN=6018;MEINFO=L1Ta,1,6019,-;DIFF=0.1:n1-5167,g5208a,t5316a,t5325c,n5332,t5339g,c5391t,t5408g,n5452-5455,c5464t,t5535g,g5538c,g5586a,c5590t,n5606-5691,n5938;LP=17;RP=21;RA=-0.305;ISTP=0;PRIOR=false;SR=12;GENE=RARB;AF=0.000199681;AC=1	0.000199681	.	.	.	.	.	.
3	25444966	TSD=TCTTTTTTCTTTTTTTTT;ASSESS=5;INTERNAL=NM_001290276,INTRONIC;SVTYPE=LINE1;SVLEN=6019;MEINFO=L1Ta,0,6019,-;DIFF=0.1:n1-5640,a5837c,c5945t;LP=47;RP=80;RA=-0.767;ISTP=0;PRIOR=false;SR=58	0.00339457	0.00358166	.	.	.	.	.
3	25903374	TSD=null;ASSESS=4;INTERNAL=null,null;SVTYPE=LINE1;SVLEN=6017;MEINFO=L1Ta1d,1,6018,-;DIFF=0.1:t151a,t231c,t254a,c324a,n399-6019;LP=8;RP=14;RA=-0.807;ISTP=0;PRIOR=false;SR=2;AF=0.000199681;AC=1	0.000199681	.	.	.	.	.	.
3	26404252	TSD=null;ASSESS=3;INTERNAL=null,null;SVTYPE=LINE1;SVLEN=6014;MEINFO=L1Ta1d,4,6018,+;DIFF=0.06:n1-3,c21t,g38a,n169,g172t,n178,n180-181,n191-192,n198-208,t231c,t254a,c305t,c351g,g352a,n390,c459t,n473-6019;LP=2;RP=39;RA=-4.285;ISTP=0;PRIOR=false;SR=5	.	.	.	.	.	0.00694444	.
3	26404266	TSD=AAAAAAAAAAAAAA;ASSESS=5;INTERNAL=LRRC3B,PROMOTER;SVTYPE=LINE1;SVLEN=6011;MEINFO=L1Ta1d,7,6018,+;DIFF=0.07:n1-6,g38a,g172t,t231c,t254a,c305t,c351g,g352a,c448t,n601-6019;LP=9;RP=103;RA=-3.517;ISTP=0;PRIOR=false;SR=73;AF=0.0244671;AC=163	.	.	.	0.0244671	.	.	.
3	27487815	TSD=AAATTGTATTCTT;ASSESS=5;INTERNAL=NM_001258379,PROMOTER;SVTYPE=LINE1;SVLEN=6016;MEINFO=L1Ta1d,3,6019,-;DIFF=0.08:n1-2,t231c,t254a,n450,n492-6019;LP=5;RP=21;RA=-2.07;ISTP=0;PRIOR=false;SR=12	0.000199681	0.000716332	.	.	.	.	.
3	28853958	TSD=dT;ASSESS=5;INTERNAL=LINC00693,TERMINATOR;SVTYPE=LINE1;SVLEN=6018;MEINFO=L1Ta1d,1,6019,+;DIFF=0.09:n1,t231c,t254a,n383,n400,g452t,n477-6019;LP=12;RP=8;RA=0.585;ISTP=0;PRIOR=false;SR=10;AF=0.000150105;AC=1	.	.	.	0.000150105	.	.	.
3	29461737	TSD=null;ASSESS=4;INTERNAL=NM_001003793,INTRONIC;SVTYPE=LINE1;SVLEN=6015;MEINFO=L1Ta,3,6018,-;DIFF=0.1:n1-5680,n5696,t5703g,n5707;LP=12;RP=14;RA=-0.222;ISTP=0;PRIOR=false;SR=8;GENE=RBMS3;AF=0.000199681;AC=1	0.000199681	.	.	.	.	.	.
3	29838947	TSD=null;ASSESS=3;INTERNAL=NM_001003793,INTRONIC;SVTYPE=LINE1;SVLEN=6019;MEINFO=L1Ta1d,0,6019,-;DIFF=0.04:n297-6019;LP=1;RP=10;RA=-3.322;ISTP=-1;PRIOR=false;SR=5	.	.	.	.	.	0.000868056	.
3	31663642	TSD=null;ASSESS=3;INTERNAL=OSBPL10,3_UTR;SVTYPE=LINE1;SVLEN=6012;MEINFO=L1Ambig,6,6018,-;DIFF=0.08:n1-4252,g4267a,t4268c,t4317c,n4327-4379,n4381,a4388g,g4408a,a4421g,g4449a,n4456-4472,c4502t,t4507c,n4549-4788,t4792c,a4816c,n4854-4967,c4977t,a5006c,n5044-5316,t5325c,a5349g,n5391-5478,c5494g,c5511t,t5535g,g5538t,n5555-5584,g5652c,n5662-6019;LP=17;RP=12;RA=0.503;ISTP=-1;PRIOR=false;SR=3	.	.	.	.	.	.	1.00735e-05
3	33695240	TSD=TTTTTTTTTTTTTTTTTTTT;ASSESS=5;INTERNAL=CLASP2,INTRONIC;SVTYPE=LINE1;SVLEN=6016;MEINFO=L1Ambig,2,6018,+;DIFF=0:n1-4597,c4601t,n4602,n4611,g4630a,n4631,n4658,c4662t,g4672t,n4678-4787,g4894a,a4898g,n4939-6019;LP=4;RP=1;RA=2;ISTP=0;PRIOR=false;SR=22;AF=0.227409;AC=1515	.	.	.	0.227409	.	.	.
3	33888171	TSD=CAGGGTCTTTGTTTTT;ASSESS=5;INTERNAL=null,null;SVTYPE=LINE1;SVLEN=6017;MEINFO=L1Ta1d,2,6019,-;DIFF=0.1:n1-2,t231c,t254a,n352-6019;LP=8;RP=28;RA=-1.807;ISTP=0;PRIOR=false;SR=25	.	.	.	0.00120084	.	0.00173611	.
3	34544246	TSD=AAAAATTTCAAACC;ASSESS=5;INTERNAL=LOC101928135,TERMINATOR;SVTYPE=LINE1;SVLEN=6013;MEINFO=L1Ta1d,6,6019,+;DIFF=0.06:n1-6,t231c,t254a,n308-336,n344,n346,n488-6019;LP=11;RP=6;RA=0.874;ISTP=0;PRIOR=false;SR=2;AF=0.000150105;AC=1	.	.	.	0.000150105	.	.	.
3	35028478	TSD=CTGTTGCATTTTC;ASSESS=5;INTERNAL=NR_110817,INTRONIC;SVTYPE=LINE1;SVLEN=6017;MEINFO=L1Ambig,2,6019,-;DIFF=0.09:n1-4479,a4661g,n4760-4846,n4879,n4928,n4968,n4997-6019;LP=7;RP=13;RA=-0.893;ISTP=0;PRIOR=false;SR=11	0.000199681	0.000716332	.	.	.	.	.
3	35225809	TSD=AAAAAAA;ASSESS=5;INTERNAL=NR_110817,INTRONIC;SVTYPE=LINE1;SVLEN=6011;MEINFO=L1Ta1d,7,6018,-;DIFF=0.02:n1-6,g38a,g55a,t92a,g103a,a117t,c125t,c137t,n150,n231-6019;LP=44;RP=4;RA=3.459;ISTP=0;PRIOR=false;SR=15	.	.	.	.	.	0.000868056	.
3	35954781	TSD=null;ASSESS=4;INTERNAL=null,null;SVTYPE=LINE1;SVLEN=6015;MEINFO=L1Ta,3,6018,-;DIFF=0.12:n1-5518,n5529,n5596,n5628,n5648;LP=20;RP=35;RA=-0.807;ISTP=0;PRIOR=false;SR=15;AF=0.000399361;AC=2	0.000399361	.	.	.	.	.	.
3	36954778	TSD=AAAAATGTATACATAC;ASSESS=5;INTERNAL=NM_014831,PROMOTER;SVTYPE=LINE1;SVLEN=6019;MEINFO=L1Ta1d,0,6019,+;DIFF=0.11:t231c,t254a,n447-6019;LP=156;RP=73;RA=1.096;ISTP=0;PRIOR=false;SR=112	0.00359425	0.00501433	.	0.00975683	.	.	.
3	37622526	TSD=TATAGATTTTA;ASSESS=5;INTERNAL=ITGA9,INTRONIC;SVTYPE=LINE1;SVLEN=6019;MEINFO=L1Ta1d,0,6019,-;DIFF=0.07:n1-2,t231c,t254a,n318-319,n322,n355-6019;LP=17;RP=29;RA=-0.771;ISTP=0;PRIOR=false;SR=34;AF=0.000450315;AC=3	.	.	.	0.000450315	.	.	.
3	38254731	TSD=GTTTTTTTTTTTTC;ASSESS=5;INTERNAL=NM_005109,3_UTR;SVTYPE=LINE1;SVLEN=6019;MEINFO=L1Ta1d,0,6019,-;DIFF=0.1:n1-2,t25c,t231c,t254a,n360-6019;LP=9;RP=15;RA=-0.737;ISTP=0;PRIOR=false;SR=6;GENE=OXSR1;AF=0.00159744;AC=8	0.00159744	.	.	.	.	.	.
3	38584591	TSD=AGAATGAGTAAATAATG;ASSESS=5;INTERNAL=NM_001160160,INTRONIC;SVTYPE=LINE1;SVLEN=6019;MEINFO=L1Ta1d,0,6019,+;DIFF=0.1:n1,t231c,t254a,n496,n513-6019;LP=8532;RP=4910;RA=0.797;ISTP=0;PRIOR=false;SR=7841	0.301318	0.29298	0.294964	0.287001	0.238095	0.264757	.
3	41394627	TSD=GAAATATACTTTCTG;ASSESS=5;INTERNAL=NM_017886,INTRONIC;SVTYPE=LINE1;SVLEN=6019;MEINFO=L1Ta1d,0,6019,+;DIFF=0.1:n1-40,g210c,t231c,t254a,a388g,n471-6019;LP=26;RP=19;RA=0.453;ISTP=0;PRIOR=false;SR=14	0.000399361	0.000716332	.	0.00165116	.	.	.
3	41922518	TSD=AACCGAAAGAG;ASSESS=5;INTERNAL=NM_017886,INTRONIC;SVTYPE=LINE1;SVLEN=6018;MEINFO=L1Ta1d,1,6019,+;DIFF=0.13:t231c,t254a,a423g,n490-6019;LP=20;RP=7;RA=1.515;ISTP=0;PRIOR=false;SR=10;GENE=ULK4;AF=0.000199681;AC=1	0.000199681	.	.	.	.	.	.
3	43207154	TSD=GAGAATTTTCTTT;ASSESS=5;INTERNAL=null,null;SVTYPE=LINE1;SVLEN=6016;MEINFO=L1Ambig,3,6019,-;DIFF=0.1:n1-3,i73g,c115a,c143t,g167a,t231c,t254a,c257t,g352a,n409,n480-6019;LP=28;RP=45;RA=-0.684;ISTP=0;PRIOR=false;SR=28;AF=0.000399361;AC=2	0.000399361	.	.	.	.	.	.
3	43578108	TSD=TAACATATTTTTCTT;ASSESS=5;INTERNAL=NM_018075,INTRONIC;SVTYPE=LINE1;SVLEN=6017;MEINFO=L1Ta1d,2,6019,-;DIFF=0.11:n1,g167a,t231c,t254a,c324a,n490-6019;LP=10;RP=12;RA=-0.263;ISTP=0;PRIOR=false;SR=11;GENE=ANO10;AF=0.000199681;AC=1	0.000199681	.	.	.	.	.	.
3	43685850	TSD=GCCTTGGTTTCTT;ASSESS=5;INTERNAL=ANO10,INTRONIC;SVTYPE=LINE1;SVLEN=6019;MEINFO=L1Ambig,0,6019,-;DIFF=0.08:n1-3,g61a,i73g,c205t,t231c,t254a,c332a,g352a,g357a,n383,n386-387,n435,n437,n439-440,n459,n471-6019;LP=4;RP=12;RA=-1.585;ISTP=0;PRIOR=false;SR=12;AF=0.000150105;AC=1	.	.	.	0.000150105	.	.	.
3	43914287	TSD=AGAAAAACCAAAGAAG;ASSESS=5;INTERNAL=null,null;SVTYPE=LINE1;SVLEN=6019;MEINFO=L1Ta1d,0,6019,+;DIFF=0.1:c144g,t231c,t254a,n417-6019;LP=14;RP=6;RA=1.222;ISTP=0;PRIOR=false;SR=7	0.000199681	0.000716332	.	.	.	.	.
3	45112998	TSD=TGAGACATCTCTT;ASSESS=5;INTERNAL=NM_178181,INTRONIC;SVTYPE=LINE1;SVLEN=6017;MEINFO=L1Ta1d,2,6019,-;DIFF=0.08:n1,t231c,t254a,n468-6019;LP=4;RP=24;RA=-2.585;ISTP=0;PRIOR=false;SR=13;GENE=CDCP1;AF=0.000199681;AC=1	0.000199681	.	.	.	.	.	.
3	47021516	TSD=AAAAACACAATTATAG;ASSESS=5;INTERNAL=NM_014159,INTRONIC;SVTYPE=LINE1;SVLEN=6016;MEINFO=L1Ta1d,3,6019,+;DIFF=0.08:n1-2,t231c,t254a,c327t,n399,n429-430,n459-6019;LP=18;RP=6;RA=1.585;ISTP=0;PRIOR=false;SR=9;GENE=SETD2;AF=0.000199681;AC=1	0.000199681	.	.	.	.	.	.
3	52396854	TSD=null;ASSESS=4;INTERNAL=DNAH1,INTRONIC;SVTYPE=LINE1;SVLEN=6016;MEINFO=L1Ambig,2,6018,+;DIFF=0.04:n1-4655,n4661,c4689t,n4732,n4735,c4779t,t4788c,n4803,n4809-4850,a4898g,n4927-4973,c4977t,a5006c,n5026-5220,a5256c,c5262t,g5268a,t5272a,c5282g,c5284t,c5292t,n5297-5457,n5468,n5470,n5511,c5513t,a5514g,n5533-5664,g5676a,a5712g,n5716-5720,c5744t,t5827a,n5846-6019;LP=11;RP=12;RA=-0.126;ISTP=-1;PRIOR=fal…	.	.	.	.	.	.	5.03687e-05
3	54750363	TSD=GGGGATACAAGTTTTT;ASSESS=5;INTERNAL=CACNA2D3,INTRONIC;SVTYPE=LINE1;SVLEN=6017;MEINFO=L1Ta1d,1,6018,-;DIFF=0.07:t231c,n370-6019;LP=5;RP=15;RA=-1.585;ISTP=0;PRIOR=false;SR=3;AF=0.000150105;AC=1	.	.	.	0.000150105	.	.	.
3	54940230	TSD=AAAAGTAGATGGG;ASSESS=5;INTERNAL=LRTM1,INTRONIC;SVTYPE=LINE1;SVLEN=6012;MEINFO=L1Ta1d,7,6019,+;DIFF=0.09:n1-6,t231c,t254a,n276,n281,n284-285,n300-301,n386-6019;LP=12;RP=11;RA=0.126;ISTP=0;PRIOR=false;SR=14;AF=0.000150105;AC=1	.	.	.	0.000150105	.	.	.
3	55238372	TSD=TCAATTAGTTATTATTT;ASSESS=5;INTERNAL=WNT5A,TERMINATOR;SVTYPE=LINE1;SVLEN=6019;MEINFO=L1Ta1d,0,6019,-;DIFF=0.08:c102t,t231c,t254a,n454-6019;LP=12;RP=24;RA=-1;ISTP=0;PRIOR=false;SR=13;AF=0.00030021;AC=2	.	.	.	0.00030021	.	.	.
3	55754552	TSD=AAATATGAATTTA;ASSESS=5;INTERNAL=NM_015576,INTRONIC;SVTYPE=LINE1;SVLEN=6018;MEINFO=L1Ta1d,1,6019,+;DIFF=0.1:n1-2,t231c,t254a,n425-6019;LP=11239;RP=7935;RA=0.502;ISTP=0;PRIOR=false;SR=9249	0.442292	0.411891	0.469874	0.280546	0.507937	0.518229	.
3	55764700	TSD=AAGACATTTGAC;ASSESS=5;INTERNAL=NM_015576,INTRONIC;SVTYPE=LINE1;SVLEN=6019;MEINFO=L1Ta1d,0,6019,+;DIFF=0.1:g53a,c90t,t231c,t254a,c324a,n491-6019;LP=19;RP=11;RA=0.788;ISTP=0;PRIOR=false;SR=16;GENE=ERC2;AF=0.000199681;AC=1	0.000199681	.	.	.	.	.	.
3	55902280	TSD=AAAACATTTTA;ASSESS=5;INTERNAL=NM_015576,INTRONIC;SVTYPE=LINE1;SVLEN=6019;MEINFO=L1Ta1d,0,6019,+;DIFF=0.13:n1-2,t231c,t254a,c327t,n446-6019;LP=50;RP=27;RA=0.889;ISTP=0;PRIOR=false;SR=48;GENE=ERC2;AF=0.000599042;AC=3	0.000599042	.	.	.	.	.	.
3	56385176	TSD=AGAAAATTTATTTCTT;ASSESS=5;INTERNAL=NM_015576,INTRONIC;SVTYPE=LINE1;SVLEN=6019;MEINFO=L1Ta1d,0,6019,+;DIFF=0.11:c144g,t231c,t254a,n489-6019;LP=47;RP=31;RA=0.6;ISTP=0;PRIOR=false;SR=33;GENE=ERC2;AF=0.000798722;AC=4	0.000798722	.	.	.	.	.	.
3	57849516	TSD=TTAATGATGAATTTT;ASSESS=5;INTERNAL=NM_007159,INTRONIC;SVTYPE=LINE1;SVLEN=6016;MEINFO=L1Ambig,3,6019,-;DIFF=0.11:n1-3,i73g,c115a,c143t,g167a,t231c,t254a,c257t,g352a,n449-6019;LP=14;RP=25;RA=-0.837;ISTP=0;PRIOR=false;SR=16;GENE=SLMAP;AF=0.000199681;AC=1	0.000199681	.	.	.	.	.	.
3	58755265	TSD=AATTGAATTTC;ASSESS=5;INTERNAL=NM_198463,INTRONIC;SVTYPE=LINE1;SVLEN=6013;MEINFO=L1Ta,5,6018,+;DIFF=0.13:n1-5569,t5628c,n5645,a5712g,c5945t;LP=13;RP=14;RA=-0.107;ISTP=0;PRIOR=false;SR=7;GENE=C3orf67;AF=0.000199681;AC=1	0.000199681	.	.	0.00030021	.	.	.
3	59275768	TSD=AGTACCTTGAATCTTTT;ASSESS=5;INTERNAL=null,null;SVTYPE=LINE1;SVLEN=6016;MEINFO=L1Ta1d,3,6019,-;DIFF=0.08:n1-3,n336,n451-454,t460g,a474c,n489,c491t,n496,n546,n572,n605-6019;LP=6;RP=24;RA=-2;ISTP=0;PRIOR=false;SR=12;GENE=LOC105377110;AF=0.000199681;AC=1	0.000199681	.	.	.	.	.	.
3	61220156	TSD=CCCTCGTTTTCATTTTT;ASSESS=5;INTERNAL=NM_001166243,INTRONIC;SVTYPE=LINE1;SVLEN=6017;MEINFO=L1Ta,2,6019,-;DIFF=0.1:n1-5532,n5683-5711,n5887,n5889,n5898,g5944t;LP=20;RP=29;RA=-0.536;ISTP=0;PRIOR=false;SR=12	0.000199681	0.000716332	.	0.00090063	.	.	.
3	63369669	TSD=TGTTGTTGTCTCTT;ASSESS=5;INTERNAL=NM_001130003,INTRONIC;SVTYPE=LINE1;SVLEN=6016;MEINFO=L1Ta,3,6019,-;DIFF=0.11:n1-5525,t5535g,g5538c,n5648,n5654,n5676-5697,n5703,n5705,t5794a,i5879g,c5945t;LP=14;RP=19;RA=-0.441;ISTP=0;PRIOR=false;SR=11;GENE=SYNPR;AF=0.000199681;AC=1	0.000199681	.	.	.	.	.	.
3	63865925	TSD=AAAAAAAAAAAAAAAAAAAAAAAAAAAAAAA;ASSESS=5;INTERNAL=ATXN7,INTRONIC;SVTYPE=LINE1;SVLEN=6010;MEINFO=L1Ambig,8,6018,+;DIFF=0:n1-4754,g4769c,a4803c,a4831t,c4866t,t4876c,g4878t,t4887c,a4891c,c4893t,a4898g,n4906-4987,n4997,n5026,n5066,t5069a,n5087,c5093a,a5102g,g5110a,t5154a,n5161-5164,t5170a,c5172a,n5180-5183,c5193g,a5201t,c5207t,a5210c,c5214t,a5255g,a5256c,c5260t,c5262t,g5268a,n5273-5274,n5288-5540…	.	.	.	0.0406785	.	.	.
3	64510568	TSD=AATTTTC;ASSESS=5;INTERNAL=ADAMTS9,TERMINATOR;SVTYPE=LINE1;SVLEN=6018;MEINFO=L1Ta1d,1,6019,-;DIFF=0.09:t231c,n312-6019;LP=6;RP=14;RA=-1.222;ISTP=0;PRIOR=false;SR=14;AF=0.000150105;AC=1	.	.	.	0.000150105	.	.	.
3	64591561	TSD=CACCATCATGATTCTT;ASSESS=5;INTERNAL=ADAMTS9,INTRONIC;SVTYPE=LINE1;SVLEN=6018;MEINFO=L1Ta1d,1,6019,-;DIFF=0.1:g210c,t231c,t254a,n300,n376-6019;LP=7;RP=10;RA=-0.515;ISTP=0;PRIOR=false;SR=10;AF=0.000150105;AC=1	.	.	.	0.000150105	.	.	.
3	64742002	TSD=AAAAGAAAGATA;ASSESS=5;INTERNAL=NR_038264,INTRONIC;SVTYPE=LINE1;SVLEN=6019;MEINFO=L1Ta1d,0,6019,+;DIFF=0.07:t231c,t254a,n415-6019;LP=12;RP=1;RA=3.585;ISTP=0;PRIOR=false;SR=11;GENE=ADAMTS9-AS2;AF=0.000199681;AC=1	0.000199681	.	.	.	.	.	.
3	65006871	TSD=ACATCTATATACATTT;ASSESS=5;INTERNAL=NR_038264,INTRONIC;SVTYPE=LINE1;SVLEN=6018;MEINFO=L1Ta1d,1,6019,-;DIFF=0.09:n1,g119a,t153c,t231c,t254a,n403-6019;LP=10;RP=12;RA=-0.263;ISTP=0;PRIOR=false;SR=19;GENE=ADAMTS9-AS2;AF=0.000199681;AC=1	0.000199681	.	.	.	.	.	.
3	65489270	TSD=AAAAAACATAAGCAC;ASSESS=5;INTERNAL=MAGI1,INTRONIC;SVTYPE=LINE1;SVLEN=6019;MEINFO=L1Ta1d,0,6019,+;DIFF=0.07:n1-2,t231c,t254a,n311-6019;LP=11;RP=4;RA=1.459;ISTP=0;PRIOR=false;SR=13;AF=0.000150105;AC=1	.	.	.	0.000150105	.	.	.
3	65762648	TSD=TCTATTTGTTTCTTT;ASSESS=5;INTERNAL=MAGI1,INTRONIC;SVTYPE=LINE1;SVLEN=6012;MEINFO=L1Ta1d,7,6019,-;DIFF=0.1:n1-7,t231c,t254a,c327t,n404-6019;LP=4;RP=14;RA=-1.807;ISTP=0;PRIOR=false;SR=5;AF=0.000150105;AC=1	.	.	.	0.000150105	.	.	.
3	67505458	TSD=TGAATCAGATTATT;ASSESS=5;INTERNAL=SUCLG2,INTRONIC;SVTYPE=LINE1;SVLEN=6015;MEINFO=L1Ta1d,4,6019,-;DIFF=0.09:n1-3,t229a,t231g,t254a,n421,n481-6019;LP=14;RP=32;RA=-1.193;ISTP=0;PRIOR=false;SR=28;AF=0.000450315;AC=3	.	.	.	0.000450315	.	.	.
3	67684712	TSD=ATAAGTGGCTG;ASSESS=5;INTERNAL=NR_109992,INTRONIC;SVTYPE=LINE1;SVLEN=6019;MEINFO=L1Ta1d,0,6019,+;DIFF=0.1:n1-2,t231c,t254a,n387-431,n582-6019;LP=173;RP=125;RA=0.469;ISTP=0;PRIOR=false;SR=157	0.0081869	0.00716332	.	0.0177124	.	0.00695652	.
3	68521835	TSD=AGAAGTGAGTCTGG;ASSESS=5;INTERNAL=NM_213609,INTRONIC;SVTYPE=LINE1;SVLEN=6011;MEINFO=L1Ambig,8,6019,+;DIFF=0.08:n1-9,g38a,i72c,g83c,t153c,t231c,t254a,g313a,g352a,g492c,n532-6019;LP=20;RP=1;RA=4.322;ISTP=0;PRIOR=false;SR=12;GENE=FAM19A1;AF=0.00599042;AC=30	0.00599042	.	.	.	.	.	.
3	68656356	TSD=CCATGCTTAATTTTT;ASSESS=5;INTERNAL=FAM19A4,TERMINATOR;SVTYPE=LINE1;SVLEN=6017;MEINFO=L1Ta,2,6019,-;DIFF=0.08:n1-5703,c5748g;LP=6;RP=5;RA=0.263;ISTP=0;PRIOR=false;SR=12;AF=0.000150105;AC=1	.	.	.	0.000150105	.	.	.
3	69525175	TSD=AAGAAAAATAAAACAA;ASSESS=5;INTERNAL=null,null;SVTYPE=LINE1;SVLEN=6019;MEINFO=L1Ta1d,0,6019,+;DIFF=0.08:n1-2,g67t,t231c,t254a,g328a,a373g,g483a,n514-6019;LP=23;RP=1;RA=4.524;ISTP=0;PRIOR=false;SR=10	.	0.000716332	.	.	.	0.000869565	.
3	72073057	TSD=ACAAGTGTTAGTTTT;ASSESS=5;INTERNAL=NR_104116,INTRONIC;SVTYPE=LINE1;SVLEN=6018;MEINFO=L1Ta1d,1,6019,-;DIFF=0.11:t231c,c445t,n460,n485-6019;LP=15;RP=25;RA=-0.737;ISTP=0;PRIOR=false;SR=20;GENE=LINC00877;AF=0.000199681;AC=1	0.000199681	.	.	.	.	.	.
3	72685765	TSD=CAAATGTCCCAGTGC;ASSESS=5;INTERNAL=null,null;SVTYPE=LINE1;SVLEN=6015;MEINFO=L1Ta1d,4,6019,+;DIFF=0.11:n1-4,t231c,t254a,a423g,n494-6019;LP=23;RP=9;RA=1.354;ISTP=0;PRIOR=false;SR=16	0.000199681	0.000716332	.	.	.	.	.
3	74519759	TSD=GAAAGTCAGAAATTTTT;ASSESS=5;INTERNAL=NM_020872,INTRONIC;SVTYPE=LINE1;SVLEN=6019;MEINFO=L1Ta1d,0,6019,-;DIFF=0.1:n1-2,t231c,t254a,n384-6019;LP=10;RP=15;RA=-0.585;ISTP=0;PRIOR=false;SR=11;GENE=CNTN3;AF=0.000199681;AC=1	0.000199681	.	.	.	.	.	.
3	74629722	TSD=AATAACTTTTT;ASSESS=5;INTERNAL=null,null;SVTYPE=LINE1;SVLEN=6018;MEINFO=L1Ta1d,1,6019,-;DIFF=0.09:t231c,t254a,n365-475,n494,n513,n539,n543,n546,n552,n564,n568,n592,n603,n626-6019;LP=9;RP=11;RA=-0.29;ISTP=0;PRIOR=false;SR=4;AF=0.000199681;AC=1	0.000199681	.	.	.	.	.	.
3	75032250	TSD=AAGATCTTTCTGT;ASSESS=5;INTERNAL=MIR4444-2,PROMOTER;SVTYPE=LINE1;SVLEN=6018;MEINFO=L1Ta1d,1,6019,+;DIFF=0.1:n1,c63t,t153g,t231c,t254a,n440-6019;LP=11;RP=12;RA=-0.126;ISTP=0;PRIOR=false;SR=14;AF=0.000150105;AC=1	.	.	.	0.000150105	.	.	.
3	75059209	TSD=AAGAATACAGATATAG;ASSESS=5;INTERNAL=null,null;SVTYPE=LINE1;SVLEN=6019;MEINFO=L1Ta1d,0,6019,+;DIFF=0.1:g210c,t231c,t254a,a388g,n455-6019;LP=27;RP=15;RA=0.848;ISTP=0;PRIOR=false;SR=20	0.000599042	0.000716332	.	.	0.00793651	.	.
3	75085283	TSD=AAAAAGTAGATGATTGTA;ASSESS=5;INTERNAL=MIR4444-2,PROMOTER;SVTYPE=LINE1;SVLEN=6010;MEINFO=L1Ta1d,8,6018,+;DIFF=0.09:n1-7,t231c,t254a,c327t,n363-6019;LP=8;RP=8;RA=0;ISTP=0;PRIOR=false;SR=4;AF=0.000150105;AC=1	.	.	.	0.000150105	.	.	.
3	76649660	TSD=null;ASSESS=4;INTERNAL=null,null;SVTYPE=LINE1;SVLEN=6017;MEINFO=L1Ta1d,2,6019,+;DIFF=0.06:n1-2,c37a,t231c,g252c,t254a,g285a,n351-6019;LP=17;RP=1;RA=4.087;ISTP=-1;PRIOR=false;SR=6	.	.	.	0.000150105	.	0.000869565	.
3	77238631	TSD=CCAAGTATATTTTA;ASSESS=5;INTERNAL=NM_001128929,INTRONIC;SVTYPE=LINE1;SVLEN=6018;MEINFO=L1Ta,1,6019,-;DIFF=0.11:n1-5564,n5615,n5802-5829,n5831,i5879g,c5945t;LP=22;RP=13;RA=0.759;ISTP=0;PRIOR=false;SR=14;GENE=ROBO2;AF=0.000199681;AC=1	0.000199681	.	.	.	.	.	.
3	77269909	TSD=null;ASSESS=4;INTERNAL=NM_001128929,INTRONIC;SVTYPE=LINE1;SVLEN=6017;MEINFO=L1Ta1d,2,6019,+;DIFF=0.06:n1-12,t231c,t254a,c327t,n463-6019;LP=10;RP=1;RA=3.322;ISTP=-1;PRIOR=false;SR=5;GENE=ROBO2;AF=0.000199681;AC=1	0.000199681	.	.	.	.	.	.
3	78079095	TSD=AAAAAATATCCC;ASSESS=5;INTERNAL=null,null;SVTYPE=LINE1;SVLEN=6019;MEINFO=L1Ta1d,0,6019,+;DIFF=0.12:g210c,t231c,g232c,t254a,n505-6019;LP=11;RP=6;RA=0.874;ISTP=0;PRIOR=false;SR=11;AF=0.000199681;AC=1	0.000199681	.	.	.	.	.	.
3	78505033	TSD=null;ASSESS=3;INTERNAL=null,null;SVTYPE=LINE1;SVLEN=6012;MEINFO=L1Ta,7,6019,+;DIFF=0.1:n1-5476,n5679;LP=18;RP=13;RA=0.469;ISTP=0;PRIOR=false;SR=4	.	0.000716332	.	.	.	.	.
3	78505164	TSD=null;ASSESS=4;INTERNAL=null,null;SVTYPE=LINE1;SVLEN=6012;MEINFO=L1Ta1d,7,6019,+;DIFF=0.09:n1-6,t231c,t254a,c327t,n344-6019;LP=35;RP=19;RA=0.881;ISTP=-1;PRIOR=false;SR=24;AF=0.000399361;AC=2	0.000399361	.	.	.	.	.	.
3	78933013	TSD=AGAAAGTTGCTAAGGATT;ASSESS=5;INTERNAL=ROBO1,INTRONIC;SVTYPE=LINE1;SVLEN=6019;MEINFO=L1Ta1d,0,6019,+;DIFF=0.1:n304-332,n334,n339-340,n342-344,n349,n351,n359-360,n363-367,n369,n375,c377g,n379,n386,n388,n390,n395,n409,n413,n415,n418,n421,n424,n426,n429,n443-445,n447-448,n481-6019;LP=49;RP=43;RA=0.188;ISTP=0;PRIOR=false;SR=60;AF=0.000450315;AC=3	.	.	.	0.000450315	.	.	.
3	79167163	TSD=AAAATTGAAGAAAGG;ASSESS=5;INTERNAL=NM_002941,INTRONIC;SVTYPE=LINE1;SVLEN=6019;MEINFO=L1Ambig,0,6019,+;DIFF=0.08:c54g,i73g,t123c,g206t,t231c,t254a,g352a,n357-375,a423g,n526-6019;LP=2210;RP=1289;RA=0.778;ISTP=0;PRIOR=false;SR=1830	0.0790735	0.0909742	0.00494604	0.205344	0.0634921	0.06	.
3	79261040	TSD=CATTTTTAGTGTTTTT;ASSESS=5;INTERNAL=NM_002941,INTRONIC;SVTYPE=LINE1;SVLEN=6016;MEINFO=L1Ambig,3,6019,-;DIFF=0.07:n1-4,g61a,i73g,t231c,t254a,g352a,n454,n515-6019;LP=5;RP=10;RA=-1;ISTP=0;PRIOR=false;SR=4;GENE=ROBO1;AF=0.000199681;AC=1	0.000199681	.	.	.	.	.	.
3	80541026	TSD=CCCATTCCATTTTC;ASSESS=5;INTERNAL=null,null;SVTYPE=LINE1;SVLEN=6017;MEINFO=L1Ta,2,6019,-;DIFF=0.12:n1-5546,g5586a,t5628c,g5704t,g5766a,a5771g,a5779t,c5788t,a5793c,a5835c,c5945t;LP=486;RP=671;RA=-0.465;ISTP=0;PRIOR=false;SR=636	0.221046	0.206304	0.259442	.	.	.	.
3	80838492	TSD=AAAACATTCAA;ASSESS=5;INTERNAL=null,null;SVTYPE=LINE1;SVLEN=6019;MEINFO=L1Ta,0,6019,+;DIFF=0.1:n1-5625,n5632,n5634,a5640c,n5642,n5657,n5678,n5685,n5693-5694,n5700,n5705;LP=29;RP=46;RA=-0.666;ISTP=0;PRIOR=false;SR=24	0.000798722	0.00143266	.	0.00330231	.	0.000869565	.
3	80927196	TSD=null;ASSESS=4;INTERNAL=null,null;SVTYPE=LINE1;SVLEN=6015;MEINFO=L1Ta,3,6018,+;DIFF=0.11:n1-5619,n5673;LP=9;RP=13;RA=-0.531;ISTP=-1;PRIOR=false;SR=9	0.000998403	0.000716332	.	0.00090063	.	.	.
3	81133509	TSD=GAAAATACCCTACATA;ASSESS=5;INTERNAL=null,null;SVTYPE=LINE1;SVLEN=6019;MEINFO=L1Ta1d,0,6019,+;DIFF=0.11:t231c,t254a,n423-6019;LP=19;RP=23;RA=-0.276;ISTP=0;PRIOR=false;SR=29;AF=0.000399361;AC=2	0.000399361	.	0.000899281	.	.	.	.
3	81875770	TSD=AAAAAATTAATGGATATA;ASSESS=5;INTERNAL=null,null;SVTYPE=LINE1;SVLEN=6012;MEINFO=L1Ta1d,7,6019,+;DIFF=0.05:n1-7,t231c,t254a,n325,c327t,n348,n363-6019;LP=16;RP=1;RA=4;ISTP=0;PRIOR=false;SR=9	.	.	.	.	.	0.000869565	.
3	82095718	TSD=GGAAATTATTATTTCT;ASSESS=5;INTERNAL=null,null;SVTYPE=LINE1;SVLEN=6018;MEINFO=L1Ta1d,1,6019,-;DIFF=0.1:n1,t231c,t254a,n357-379,n383-384,n530-6019;LP=2398;RP=4474;RA=-0.9;ISTP=0;PRIOR=false;SR=3904	0.148363	0.181232	0.0535072	0.322726	0.134921	.	.
3	82202802	TSD=GACTTAATTTA;ASSESS=5;INTERNAL=GBE1,PROMOTER;SVTYPE=LINE1;SVLEN=6018;MEINFO=L1Ta1d,1,6019,-;DIFF=0.12:n1,t231c,t254a,n444-6019;LP=10;RP=13;RA=-0.379;ISTP=0;PRIOR=false;SR=8;AF=0.000150105;AC=1	.	.	.	0.000150105	.	.	.
3	82577793	TSD=AAAAATAGACAGGAGTC;ASSESS=5;INTERNAL=GBE1,PROMOTER;SVTYPE=LINE1;SVLEN=6018;MEINFO=L1Ta1d,1,6019,+;DIFF=0.08:n1,g167a,t231c,t254a,c295t,c324a,n364,n452-6019;LP=11;RP=8;RA=0.459;ISTP=0;PRIOR=false;SR=7;AF=0.000150105;AC=1	.	.	.	0.000150105	.	.	.
3	84384244	TSD=TAAAACAGATA;ASSESS=5;INTERNAL=null,null;SVTYPE=LINE1;SVLEN=6015;MEINFO=L1Ambig,4,6019,+;DIFF=0.12:n1-619,n631,n640,n644,i758ctgacac,g999a,c1029t,c1091a,n1102-6019;LP=4292;RP=2699;RA=0.669;ISTP=0;PRIOR=false;SR=3919	0.210663	0.189828	0.164568	0.152507	0.261905	0.205106	.
3	85527418	TSD=AAAGAAAGAAAAAATTCTG;ASSESS=5;INTERNAL=NM_001256502,INTRONIC;SVTYPE=LINE1;SVLEN=6016;MEINFO=L1Ta1d,3,6019,+;DIFF=0.12:n1-2,t231c,t254a,n417-440,n450-451,n472,n492,n536,n568,n573,n591-6019;LP=6023;RP=5397;RA=0.158;ISTP=0;PRIOR=false;SR=4850	0.292532	0.265043	0.366457	0.106725	0.396825	0.321739	.
3	85638730	TSD=null;ASSESS=3;INTERNAL=CADM2,INTRONIC;SVTYPE=LINE1;SVLEN=6019;MEINFO=L1Ambig,0,6019,-;DIFF=0.07:n1-619,c649g,d674-676,n678,c792g,c834a,g999a,n1018-6019;LP=1;RP=11;RA=-3.459;ISTP=-1;PRIOR=false;SR=9;AF=0.000150105;AC=1	.	.	.	0.000150105	.	.	.
3	86135678	TSD=AAAAAGAAAAAAGGTT;ASSESS=5;INTERNAL=null,null;SVTYPE=LINE1;SVLEN=6017;MEINFO=L1Ta1d,2,6019,+;DIFF=0.1:n1-2,t231c,t254a,n364-410,n537,n561-6019;LP=77;RP=52;RA=0.566;ISTP=0;PRIOR=false;SR=43	0.00479233	0.00358166	.	0.00060042	.	0.00087108	.
3	90304077	TSD=null;ASSESS=3;INTERNAL=null,null;SVTYPE=LINE1;SVLEN=6003;MEINFO=L1Ambig,15,6018,-;DIFF=0.07:n1-4047,c4095t,c4125t,n4199-4293,t4317c,g4359t,g4408a,c4425t,n4445-6019;LP=8;RP=5;RA=0.678;ISTP=-1;PRIOR=false;SR=3	.	.	.	.	.	0.0444251	.
3	90530454	TSD=null;ASSESS=3;INTERNAL=null,null;SVTYPE=LINE1;SVLEN=6015;MEINFO=L1Ambig,3,6018,-;DIFF=0.07:n1-2,c21a,g22a,c37t,g55a,i73g,c115t,c130g,c137t,c143t,c144t,t149g,t153a,g154a,g163a,c166t,g172a,c197t,c205g,g211t,c215t,g218t,t231c,n241-242,c251g,n253,t254a,n255-255,n265,n271,t277c,n278,n281,g294a,n296,a301g,a303g,g307c,g313a,n316,c332t,c340t,a341g,c363a,a373g,n392-6019;LP=583;RP=15;RA=5.28;ISTP=-1;PR…	.	.	.	.	.	0.0147826	.
3	90579568	TSD=null;ASSESS=4;INTERNAL=null,null;SVTYPE=LINE1;SVLEN=6015;MEINFO=L1Ambig,4,6019,-;DIFF=0.06:n1-12,c21a,g22a,c37t,g55a,i73g,c130g,c137t,c143t,c144t,t149g,t153a,g154a,g163a,c166t,g172a,c197t,c205g,g211t,c215t,g218t,t231c,n251-277,g294a,a301g,a303g,g313a,c332t,n340,a341g,c363a,a373g,n392-392,a423g,c424t,c429t,g483a,c495t,n548-6019;LP=581;RP=1359;RA=-1.226;ISTP=0;PRIOR=false;SR=110	0.000399361	0.00143266	.	.	.	.	.
3	90595913	TSD=null;ASSESS=3;INTERNAL=null,null;SVTYPE=LINE1;SVLEN=6015;MEINFO=L1Ambig,3,6018,-;DIFF=0.03:n1-5809,c5828a,g5845c,g5870t,c5878g,g5885t,t5902c,g5903a,c5913a,c5930a,a5931g,t5933g,g5946a,g6014a;LP=4;RP=63;RA=-3.977;ISTP=-1;PRIOR=false;SR=10	.	.	.	.	.	0.000869565	.
3	91532555	TSD=AAAAGAAAGTTTAAACTC;ASSESS=5;INTERNAL=null,null;SVTYPE=LINE1;SVLEN=6019;MEINFO=L1Ta1d,0,6019,+;DIFF=0.11:n1-12,c37t,t231c,t254a,n408-6019;LP=4021;RP=2288;RA=0.813;ISTP=0;PRIOR=false;SR=2962	0.135184	0.151862	.	.	0.190476	0.206087	.
3	93714339	TSD=AAGAAATCCCG;ASSESS=5;INTERNAL=null,null;SVTYPE=LINE1;SVLEN=6019;MEINFO=L1Ta1d,0,6019,+;DIFF=0.13:n1-2,t231c,t254a,c327t,n431,n433,n629-6019;LP=34;RP=15;RA=1.181;ISTP=0;PRIOR=false;SR=18	0.000409165	0.00218341	.	.	.	.	.
3	93827489	TSD=AAAAATAGAGTTCT;ASSESS=5;INTERNAL=null,null;SVTYPE=LINE1;SVLEN=6016;MEINFO=L1Ta1d,3,6019,+;DIFF=0.07:n1-3,t231c,t254a,n349-6019;LP=16;RP=3;RA=2.415;ISTP=0;PRIOR=false;SR=12;GENE=LOC107986037;AF=0.000199681;AC=1	0.000199681	.	.	.	.	.	.
3	94484393	TSD=GATAGCACAGCATTTTT;ASSESS=5;INTERNAL=null,null;SVTYPE=LINE1;SVLEN=6015;MEINFO=L1Ta1d,4,6019,-;DIFF=0.1:n1-4,t231c,t254a,n430,n452-6019;LP=152;RP=280;RA=-0.881;ISTP=0;PRIOR=false;SR=113	0.00758786	0.0100287	.	0.015761	.	0.00434783	.
3	96240540	TSD=CTGCTATATCCTTTT;ASSESS=5;INTERNAL=null,null;SVTYPE=LINE1;SVLEN=6016;MEINFO=L1Ambig,3,6019,-;DIFF=0.1:n1-3,i73g,c115a,g167a,t231c,t254a,c257t,g352a,n479-6019;LP=5;RP=17;RA=-1.766;ISTP=0;PRIOR=false;SR=7	0.000399361	0.000716332	.	.	.	.	.
3	97793554	TSD=AGTCTTCTGGATTTTA;ASSESS=5;INTERNAL=NR_103511,INTRONIC;SVTYPE=LINE1;SVLEN=6018;MEINFO=L1Ta1d,1,6019,-;DIFF=0.11:n1,g172a,t231c,t254a,n599-6019;LP=12;RP=43;RA=-1.841;ISTP=0;PRIOR=false;SR=34	0.000599042	0.00143266	.	0.00165116	.	.	.
3	99056656	TSD=CCCAGCCCTTCTTCTT;ASSESS=5;INTERNAL=null,null;SVTYPE=LINE1;SVLEN=6012;MEINFO=L1Ta1d,7,6019,-;DIFF=0.11:n1-6,g22a,t231c,t254a,c317t,c320t,c363t,n462-6019;LP=1558;RP=2673;RA=-0.779;ISTP=0;PRIOR=false;SR=2557	0.0842652	0.0952722	.	0.206545	0.015873	0.0321739	.
3	99790591	TSD=AAAGACTGTTTCCC;ASSESS=5;INTERNAL=NM_001850,INTRONIC;SVTYPE=LINE1;SVLEN=6018;MEINFO=L1Ta1d,1,6019,+;DIFF=0.11:n1-3,n410-448,n460,c491t,n599-6019;LP=19;RP=16;RA=0.248;ISTP=0;PRIOR=false;SR=15	0.000798722	0.000716332	.	.	.	.	.
3	99880974	TSD=ACATTGGGCTATTTA;ASSESS=5;INTERNAL=FILIP1L,INTRONIC;SVTYPE=LINE1;SVLEN=6017;MEINFO=L1Ta,1,6018,-;DIFF=0.08:n1-5609,n5626,n5649,n5660,c5662a,n5670,n5672-5673,n5682;LP=227;RP=116;RA=0.969;ISTP=0;PRIOR=false;SR=109;AF=0.00405284;AC=27	.	.	.	0.00405284	.	.	.
3	100629366	TSD=A;ASSESS=5;INTERNAL=NM_032787,INTRONIC;SVTYPE=LINE1;SVLEN=6019;MEINFO=L1Ta,0,6019,-;DIFF=0.09:n1-5629,a5642t,t6012g;LP=11;RP=21;RA=-0.933;ISTP=0;PRIOR=false;SR=7;GENE=ADGRG7;AF=0.000199681;AC=1	0.000199681	.	.	.	.	.	.
3	100833472	TSD=AAAAATTAGGAAAAACT;ASSESS=5;INTERNAL=ABI3BP,INTRONIC;SVTYPE=LINE1;SVLEN=6017;MEINFO=L1Ta1d,2,6019,+;DIFF=0.07:n1-5,g152c,t231c,t254a,n319-6019;LP=11;RP=6;RA=0.874;ISTP=0;PRIOR=false;SR=8;AF=0.000150105;AC=1	.	.	.	0.000150105	.	.	.
3	100875103	TSD=null;ASSESS=3;INTERNAL=NM_015429,INTRONIC;SVTYPE=LINE1;SVLEN=6017;MEINFO=L1Ta,1,6018,+;DIFF=0.11:n1-5599,n5674,n5684,n5688;LP=13;RP=9;RA=0.531;ISTP=0;PRIOR=false;SR=5	.	0.000716332	.	.	.	.	.
3	100875115	TSD=AGAATATTTTTC;ASSESS=5;INTERNAL=NM_015429,INTRONIC;SVTYPE=LINE1;SVLEN=6017;MEINFO=L1Ta1d,1,6018,+;DIFF=0.14:a52t,t231c,t254a,c369t,n383,n422-472,n633-6019;LP=23;RP=18;RA=0.354;ISTP=0;PRIOR=false;SR=10;GENE=ABI3BP;AF=0.000399361;AC=2	0.000399361	.	.	.	.	.	.
3	100925932	TSD=null;ASSESS=3;INTERNAL=NM_015429,INTRONIC;SVTYPE=LINE1;SVLEN=6010;MEINFO=L1Ta1d,8,6018,+;DIFF=0.11:n1-7,c37t,g61a,t231c,t254a,n408-6019;LP=16;RP=14;RA=0.193;ISTP=0;PRIOR=false;SR=4;GENE=ABI3BP;AF=0.000199681;AC=1	0.000199681	.	.	.	.	.	.
3	101065033	TSD=AGAACATGAGCATTGGC;ASSESS=5;INTERNAL=null,null;SVTYPE=LINE1;SVLEN=6005;MEINFO=L1Ta1d,14,6019,+;DIFF=0.1:n1-14,c144g,t231c,t254a,n480-6019;LP=17;RP=7;RA=1.28;ISTP=0;PRIOR=false;SR=15;AF=0.000199681;AC=1	0.000199681	.	.	.	.	.	.
3	102426782	TSD=CTGGCTAAAACTTTT;ASSESS=5;INTERNAL=NM_175056,PROMOTER;SVTYPE=LINE1;SVLEN=6016;MEINFO=L1Ambig,3,6019,-;DIFF=0.12:n1-3,i73g,c115a,g167a,c205t,t231c,t254a,c257t,c305t,g352a,n451,n465-6019;LP=21;RP=39;RA=-0.893;ISTP=0;PRIOR=false;SR=29	0.000599042	0.00143266	.	.	.	.	.
3	103563194	TSD=null;ASSESS=4;INTERNAL=null,null;SVTYPE=LINE1;SVLEN=6014;MEINFO=L1Ambig,4,6018,+;DIFF=0.04:n1-3,i73g,t231c,t254a,n293-331,n333,n337,a343c,n348,n350,g352a,n357-358,n363-364,n368,a373g,n378,n387,n389,n396-397,n403,n405-406,n409,n418,n452-6019;LP=9;RP=30;RA=-1.737;ISTP=-1;PRIOR=false;SR=4	.	.	.	.	.	0.00521739	.
3	103563208	TSD=null;ASSESS=4;INTERNAL=MIR548AB,PROMOTER;SVTYPE=LINE1;SVLEN=6014;MEINFO=L1Ambig,4,6018,-;DIFF=0.1:n1-4,n8,n10-12,g22t,i73g,g206a,t231c,c251a,t254a,g352a,a373g,n429,n450,n452,n459-460,g498a,g501a,g514t,n520,c533a,c536t,t537a,n542,c543t,c546g,n549-549,c563a,c573t,n581,n584,g586t,c600t,n675-678,t708c,c771t,n814-6019;LP=9;RP=19;RA=-1.078;ISTP=0;PRIOR=false;SR=1;AF=0.00210147;AC=14	.	.	.	0.00210147	.	.	.
3	103935243	TSD=TAATCTAAATTGTT;ASSESS=5;INTERNAL=MIR548AB,PROMOTER;SVTYPE=LINE1;SVLEN=6014;MEINFO=L1Ta1d,5,6019,-;DIFF=0.08:n1-4,n146-153,t231c,t254a,c327t,a329c,n363-6019;LP=8;RP=7;RA=0.193;ISTP=0;PRIOR=false;SR=6;AF=0.000150105;AC=1	.	.	.	0.000150105	.	.	.
3	105380776	TSD=AAGAATTGTC;ASSESS=5;INTERNAL=NM_001627,INTRONIC;SVTYPE=LINE1;SVLEN=6016;MEINFO=L1Ta1d,3,6019,+;DIFF=0.08:n1-3,t231c,t254a,n322,n352-6019;LP=19;RP=2;RA=3.248;ISTP=0;PRIOR=false;SR=7	.	.	.	.	.	0.000869565	.
3	105411578	TSD=TCCATTCATTTAATTTTC;ASSESS=5;INTERNAL=NM_001627,INTRONIC;SVTYPE=LINE1;SVLEN=6017;MEINFO=L1Ta1d,2,6019,-;DIFF=0.07:n1,t231c,t254a,n477-6019;LP=1;RP=32;RA=-5;ISTP=0;PRIOR=false;SR=22;GENE=ALCAM;AF=0.000399361;AC=2	0.000399361	.	.	.	.	.	.
3	107719690	TSD=GGGTTGCTTTCTT;ASSESS=5;INTERNAL=NM_001276286,INTRONIC;SVTYPE=LINE1;SVLEN=6019;MEINFO=L1Ta1d,0,6019,-;DIFF=0.09:n1-2,t231c,t248c,t254a,c327t,n336,n378-410,n494,n561-6019;LP=8;RP=21;RA=-1.392;ISTP=0;PRIOR=false;SR=14;GENE=BBX;AF=0.000199681;AC=1	0.000199681	.	.	.	.	.	.
3	107747949	TSD=null;ASSESS=3;INTERNAL=BBX,INTRONIC;SVTYPE=LINE1;SVLEN=6009;MEINFO=L1Ta1d,10,6019,-;DIFF=0.03:n1-9,n170-6019;LP=1;RP=7;RA=-2.807;ISTP=-1;PRIOR=false;SR=10	.	.	.	.	.	.	2.01471e-05
3	108851089	TSD=CTCAATTTTATTTC;ASSESS=5;INTERNAL=NM_016388,INTRONIC;SVTYPE=LINE1;SVLEN=6017;MEINFO=L1Ta1d,2,6019,-;DIFF=0.12:g210c,t231c,t254a,a388g,n662-6019;LP=9;RP=25;RA=-1.474;ISTP=0;PRIOR=false;SR=14	0.000599042	0.000716332	.	0.00210147	.	.	.
3	109046003	TSD=null;ASSESS=3;INTERNAL=NM_014429,INTRONIC;SVTYPE=LINE1;SVLEN=6014;MEINFO=L1Ta1d,4,6018,+;DIFF=0.11:n1-3,n426-6019;LP=29;RP=26;RA=0.158;ISTP=0;PRIOR=false;SR=16;GENE=MORC1;AF=0.000399361;AC=2	0.000399361	.	.	.	.	.	.
3	109125969	TSD=AGAAATTCCTCCC;ASSESS=5;INTERNAL=FLJ22763,PROMOTER;SVTYPE=LINE1;SVLEN=6019;MEINFO=L1Ta1d,0,6019,+;DIFF=0.11:c171a,n442-6019;LP=9;RP=12;RA=-0.415;ISTP=0;PRIOR=false;SR=10;AF=0.000150105;AC=1	.	.	.	0.000150105	.	.	.
3	109621173	TSD=GAAAGTTACACTAGTG;ASSESS=5;INTERNAL=MIR4445,TERMINATOR;SVTYPE=LINE1;SVLEN=6019;MEINFO=L1Ta1d,0,6019,+;DIFF=0.04:g201a,t231c,t254a,n292-6019;LP=11;RP=1;RA=3.459;ISTP=0;PRIOR=false;SR=10;AF=0.000150105;AC=1	.	.	.	0.000150105	.	.	.
3	110902254	TSD=null;ASSESS=3;INTERNAL=PVRL3-AS1,TERMINATOR;SVTYPE=LINE1;SVLEN=6017;MEINFO=L1Ta1d,1,6018,+;DIFF=0.08:g38c,n336-6019;LP=9;RP=8;RA=0.17;ISTP=0;PRIOR=false;SR=6;AF=0.000150105;AC=1	.	.	.	0.000150105	.	.	.
3	110933189	TSD=TATATCTATATCTT;ASSESS=5;INTERNAL=null,null;SVTYPE=LINE1;SVLEN=6019;MEINFO=L1Ta1d,0,6019,-;DIFF=0.08:c205g,t231c,g252t,t254a,n363-6019;LP=3;RP=23;RA=-2.939;ISTP=0;PRIOR=false;SR=3;GENE=LOC151760;AF=0.000199681;AC=1	0.000199681	.	.	0.000150105	.	.	.
3	111080630	TSD=GGGTTAAGTAATATTTA;ASSESS=5;INTERNAL=NM_001243288,INTRONIC;SVTYPE=LINE1;SVLEN=6019;MEINFO=L1Ta1d,0,6019,-;DIFF=0.09:t231c,t254a,n365,n395,n397,n409,n449,n490-6019;LP=13;RP=17;RA=-0.387;ISTP=0;PRIOR=false;SR=14;GENE=NECTIN3;AF=0.000199681;AC=1	0.000199681	.	.	0.000450315	.	.	.
3	111653860	TSD=AAAAATTGTAACAGAA;ASSESS=5;INTERNAL=null,null;SVTYPE=LINE1;SVLEN=6019;MEINFO=L1Ta,0,6019,+;DIFF=0.12:n1-5508,n5593-5594,n5596,n5601;LP=55;RP=40;RA=0.459;ISTP=0;PRIOR=false;SR=48;GENE=CD96;AF=0.000599042;AC=3	0.000599042	.	0.00044964	.	.	.	.
3	111734163	TSD=TGGAAAACTGATACGTTTCT;ASSESS=5;INTERNAL=NM_001134437,INTRONIC;SVTYPE=LINE1;SVLEN=6018;MEINFO=L1Ta1d,1,6019,-;DIFF=0.14:n511-6019;LP=10;RP=24;RA=-1.263;ISTP=0;PRIOR=false;SR=15;GENE=PLCXD2;AF=0.000199681;AC=1	0.000199681	.	.	.	.	.	.
3	112208798	TSD=AAAATGATTATCCA;ASSESS=5;INTERNAL=NM_183061,INTRONIC;SVTYPE=LINE1;SVLEN=6019;MEINFO=L1Ambig,0,6019,+;DIFF=0.11:n1-2,g64a,i73g,t231c,t254a,g352a,n384-390,a423g,g425c,g492c,n570-6019;LP=42;RP=32;RA=0.392;ISTP=0;PRIOR=false;SR=20;GENE=SLC9C1;AF=0.000399361;AC=2	0.000399361	.	.	.	.	.	.
3	112390555	TSD=AAAATATGAAATAATTT;ASSESS=5;INTERNAL=null,null;SVTYPE=LINE1;SVLEN=6018;MEINFO=L1Ta,1,6019,+;DIFF=0.1:n1-5650,n5653,n5657,n5659,n5661,n5664,n5666-5668,n5670-5672,n5675-5676,n5684,n5686,n5688,c5691a,n5692-5693,n5720,n5744,n5761,t5794g;LP=29;RP=19;RA=0.61;ISTP=0;PRIOR=false;SR=23;GENE=LOC105374041;AF=0.000399361;AC=2	0.000399361	.	.	.	.	.	.
3	115391281	TSD=AGATATTAATAATACC;ASSESS=5;INTERNAL=null,null;SVTYPE=LINE1;SVLEN=6013;MEINFO=L1Ta1d,5,6018,-;DIFF=0.05:n1-4,t231c,t254a,n318-6019;LP=13;RP=1;RA=3.7;ISTP=0;PRIOR=false;SR=11	.	.	.	.	.	0.000869565	.
3	115729905	TSD=AAGAATAACATTTGTTG;ASSESS=5;INTERNAL=NM_002045,TERMINATOR;SVTYPE=LINE1;SVLEN=6015;MEINFO=L1Ta,4,6019,+;DIFF=0.11:n1-5582,g5766t,a6007t;LP=586;RP=293;RA=1;ISTP=0;PRIOR=false;SR=348	0.0151757	0.0243553	.	0.0492345	0.015873	0.00869565	.
3	116272651	TSD=null;ASSESS=4;INTERNAL=LSAMP,INTRONIC;SVTYPE=LINE1;SVLEN=6017;MEINFO=L1Ta,1,6018,-;DIFF=0.05:n1-5774,n5823,n5825,n5827,n5840,n5844-5846,n5859;LP=6;RP=8;RA=-0.415;ISTP=0;PRIOR=false;SR=7;AF=0.000150105;AC=1	.	.	.	0.000150105	.	.	.
3	117436532	TSD=null;ASSESS=3;INTERNAL=LINC00901,TERMINATOR;SVTYPE=LINE1;SVLEN=6018;MEINFO=L1Ta1d,1,6019,-;DIFF=0.04:n1,t231c,n253,t254a,n256-256,n304,n357-6019;LP=3;RP=7;RA=-1.222;ISTP=-1;PRIOR=false;SR=6;AF=0.000150105;AC=1	.	.	.	0.000150105	.	.	.
3	117511631	TSD=TATTTTTATTT;ASSESS=5;INTERNAL=null,null;SVTYPE=LINE1;SVLEN=6015;MEINFO=L1Ambig,4,6019,-;DIFF=0.11:n1-3,i73g,t153c,t231c,g246c,t254a,c305a,g352a,c410t,n444-6019;LP=20;RP=37;RA=-0.888;ISTP=0;PRIOR=false;SR=21	0.00159744	0.00143266	.	0.0060042	.	.	.
3	117728800	TSD=AAGATTCCCCTCC;ASSESS=5;INTERNAL=null,null;SVTYPE=LINE1;SVLEN=6018;MEINFO=L1Ta1d,1,6019,+;DIFF=0.1:n1-10,g167a,n211-221,t231c,t254a,c324a,n480-6019;LP=19;RP=12;RA=0.663;ISTP=0;PRIOR=false;SR=17;GENE=LOC101926953;AF=0.000199681;AC=1	0.000199681	.	.	.	.	.	.
3	117870500	TSD=AAAAAGATCCTTACT;ASSESS=5;INTERNAL=null,null;SVTYPE=LINE1;SVLEN=6019;MEINFO=L1Ta1d,0,6019,+;DIFF=0.11:n479-6019;LP=20;RP=8;RA=1.322;ISTP=0;PRIOR=false;SR=15;GENE=LOC107986022;AF=0.000199681;AC=1	0.000199681	.	.	.	.	.	.
3	118585453	TSD=AAAGAAGTTGATCAA;ASSESS=5;INTERNAL=null,null;SVTYPE=LINE1;SVLEN=6017;MEINFO=L1Ta1d,2,6019,+;DIFF=0.1:n1-2,t231c,t254a,n376,n452-6019;LP=15;RP=9;RA=0.737;ISTP=0;PRIOR=false;SR=12;GENE=LOC105374060;AF=0.000199681;AC=1	0.000199681	.	.	.	.	.	.
3	119950167	TSD=AAAAAATTTTTAG;ASSESS=5;INTERNAL=NM_001146156,INTRONIC;SVTYPE=LINE1;SVLEN=6018;MEINFO=L1Ta1d,1,6019,+;DIFF=0.07:n210,t231c,t254a,n314-6019;LP=14;RP=7;RA=1;ISTP=0;PRIOR=false;SR=16;GENE=GSK3B;AF=0.000199681;AC=1	0.000199681	.	.	.	.	.	.
3	120508614	TSD=GATAACTTCT;ASSESS=5;INTERNAL=NDUFB4,PROMOTER;SVTYPE=LINE1;SVLEN=6017;MEINFO=L1Ta1d,2,6019,-;DIFF=0.1:n1-2,g61a,t231c,t254a,c305a,n375-6019;LP=12;RP=14;RA=-0.222;ISTP=0;PRIOR=false;SR=14;AF=0.000150105;AC=1	.	.	.	0.000150105	.	.	.
3	121117529	TSD=AGAAAATGTATGTAACTTCCTG;ASSESS=5;INTERNAL=NM_014980,INTRONIC;SVTYPE=LINE1;SVLEN=6017;MEINFO=L1Ta1d,2,6019,+;DIFF=0.08:n1,t231c,t254a,n420-6019;LP=30;RP=6;RA=2.322;ISTP=0;PRIOR=false;SR=18;GENE=STXBP5L;AF=0.000199681;AC=1	0.000199681	.	.	.	.	.	.
3	122258817	TSD=TAAAAATACTGGTGCC;ASSESS=5;INTERNAL=NM_001178065,INTRONIC;SVTYPE=LINE1;SVLEN=6018;MEINFO=L1Ta1d,1,6019,+;DIFF=0.06:n1,t231c,t254a,n349-6019;LP=15;RP=1;RA=3.907;ISTP=0;PRIOR=false;SR=6	.	.	.	.	.	0.000869565	.
3	123289326	TSD=TAAATAAAACAACGCGG;ASSESS=5;INTERNAL=NM_183357,INTRONIC;SVTYPE=LINE1;SVLEN=6019;MEINFO=L1Ta1d,0,6019,+;DIFF=0.07:t231c,t254a,t297g,n343,n376-394,n412,n415,a423g,n460,n464,n466,n469-470,a475c,n476,n490,n545-6019;LP=20;RP=10;RA=1;ISTP=0;PRIOR=false;SR=8	0.000599042	0.000716332	.	0.00165116	.	.	.
3	123481911	TSD=GGAGCCTGACTTTT;ASSESS=5;INTERNAL=null,null;SVTYPE=LINE1;SVLEN=6018;MEINFO=L1Ambig,1,6019,-;DIFF=0.05:n1-3,i73g,c115a,g167a,t231c,t254a,c257t,g352a,n378-6019;LP=2;RP=8;RA=-2;ISTP=0;PRIOR=false;SR=4	.	0.000716332	.	.	.	.	.
3	123746190	TSD=null;ASSESS=3;INTERNAL=MYLK,INTRONIC;SVTYPE=LINE1;SVLEN=6017;MEINFO=L1Ta1d,1,6018,+;DIFF=0.1:c144g,g165c,t231c,t254a,g364c,n416-6019;LP=22;RP=22;RA=0;ISTP=0;PRIOR=false;SR=6;AF=0.00030021;AC=2	.	.	.	0.00030021	.	.	.
3	124059068	TSD=AAGAAAAAAAA;ASSESS=5;INTERNAL=KALRN,PROMOTER;SVTYPE=LINE1;SVLEN=6019;MEINFO=L1Ta1d,0,6019,+;DIFF=0.08:t231c,n322,n351-6019;LP=33;RP=13;RA=1.344;ISTP=0;PRIOR=false;SR=10;AF=0.00030021;AC=2	.	.	.	0.00030021	.	.	.
3	125689887	TSD=AGGATATCACGAATAA;ASSESS=5;INTERNAL=null,null;SVTYPE=LINE1;SVLEN=6019;MEINFO=L1Ta1d,0,6019,+;DIFF=0.1:g167a,t231c,t254a,c324a,g446a,n482-6019;LP=45;RP=31;RA=0.538;ISTP=0;PRIOR=false;SR=38;AF=0.000399361;AC=2	0.000399361	.	.	.	.	.	.
3	125859211	TSD=AAAAAAAAAAAAAAAAAA;ASSESS=5;INTERNAL=NR_125395,INTRONIC;SVTYPE=LINE1;SVLEN=6018;MEINFO=L1Ta1d,1,6019,+;DIFF=0.13:n1,t231c,t254a,n547,n581,n586,n591-6019;LP=42;RP=19;RA=1.144;ISTP=0;PRIOR=false;SR=29	.	0.00143266	.	.	.	.	.
3	127948212	TSD=AAAACTTTTACTGTG;ASSESS=5;INTERNAL=KBTBD12,INTRONIC;SVTYPE=LINE1;SVLEN=6017;MEINFO=L1Ta1d,2,6019,+;DIFF=0.09:n1,g167a,t231c,t254a,c324a,n334-335,n340,n344,t346a,n351-352,n356-357,c359t,n364-365,c366a,n369-371,n375,n378,a382t,n392-395,n399,n403,n406,n416,n422,n424-425,n428-429,n439-6019;LP=36;RP=18;RA=1;ISTP=0;PRIOR=false;SR=29;AF=0.000450315;AC=3	.	.	.	0.000450315	.	.	.
3	129426690	TSD=TATTATTTATTTTT;ASSESS=5;INTERNAL=NM_207307,INTRONIC;SVTYPE=LINE1;SVLEN=6017;MEINFO=L1Ta1d,2,6019,-;DIFF=0.1:n1,t231c,t254a,n372-6019;LP=8;RP=16;RA=-1;ISTP=0;PRIOR=false;SR=9;GENE=EFCAB12;AF=0.000199681;AC=1	0.000199681	.	.	.	.	.	.
3	130272607	TSD=TCCAATGCTGTTTTT;ASSESS=5;INTERNAL=NR_027898,5_UTR;SVTYPE=LINE1;SVLEN=6019;MEINFO=L1Ambig,0,6019,-;DIFF=0.1:n1-3,i73g,c115a,c143t,g167a,t231c,t254a,c257t,g352a,n513-6019;LP=53;RP=95;RA=-0.842;ISTP=0;PRIOR=false;SR=67;GENE=COL6A4P2;AF=0.000998403;AC=5	0.000998403	.	.	.	.	.	.
3	131142467	TSD=CATATAAAATTATT;ASSESS=5;INTERNAL=NM_024800,INTRONIC;SVTYPE=LINE1;SVLEN=6017;MEINFO=L1Ta1d,2,6019,-;DIFF=0.1:n1-2,t231c,t254a,n452-6019;LP=91;RP=147;RA=-0.692;ISTP=0;PRIOR=false;SR=119	0.00459265	0.00573066	0.00854317	0.00210147	0.00793651	0.00956522	.
3	131350935	TSD=AACAATATTGCA;ASSESS=5;INTERNAL=NR_038976,INTRONIC;SVTYPE=LINE1;SVLEN=6019;MEINFO=L1Ambig,0,6019,+;DIFF=0.12:n1-3,g61a,i73g,c205t,t231c,t254a,g352a,n530-6019;LP=1975;RP=1190;RA=0.731;ISTP=0;PRIOR=false;SR=2219	0.0587061	0.0730659	.	0.180276	0.0238095	0.0278261	.
3	131700310	TSD=AAGACAAAGTAG;ASSESS=5;INTERNAL=NM_153429,INTRONIC;SVTYPE=LINE1;SVLEN=6015;MEINFO=L1Ta,4,6019,+;DIFF=0.09:n1-5503,t5535g,g5538c,c5564t,g5586a,c5616t,a5712g,c5744t,c5761a,g5766t,n5789-5799,n5989,n6018;LP=37;RP=23;RA=0.686;ISTP=0;PRIOR=false;SR=16;GENE=CPNE4;AF=0.000199681;AC=1	0.000199681	.	.	.	.	.	.
3	131815886	TSD=null;ASSESS=3;INTERNAL=NM_153429,INTRONIC;SVTYPE=LINE1;SVLEN=6018;MEINFO=L1Ta1d,1,6019,-;DIFF=0.04:c37a,g167c,t231c,g252c,t254a,n281-6019;LP=1;RP=26;RA=-4.7;ISTP=-1;PRIOR=false;SR=8;GENE=CPNE4	.	.	.	.	0.00793651	.	.
3	131815900	TSD=TCCTATAAATCTTT;ASSESS=5;INTERNAL=NM_153429,INTRONIC;SVTYPE=LINE1;SVLEN=6018;MEINFO=L1Ta1d,1,6019,-;DIFF=0.09:c37a,g167c,t231c,g252c,t254a,g285a,c363t,n372-6019;LP=30;RP=53;RA=-0.821;ISTP=0;PRIOR=false;SR=31	0.00159744	0.002149	.	0.000750525	.	0.0026087	.
3	132118799	TSD=GATTTTAATAAACTTTT;ASSESS=5;INTERNAL=null,null;SVTYPE=LINE1;SVLEN=6016;MEINFO=L1Ta1d,3,6019,-;DIFF=0.1:n1-2,g61a,t231c,t254a,g352a,n438-6019;LP=143;RP=165;RA=-0.206;ISTP=0;PRIOR=false;SR=127	0.0081869	0.00716332	.	0.0163615	.	.	.
3	132781779	TSD=AAGAATAATTCTGTG;ASSESS=5;INTERNAL=NPHP3-AS1,INTRONIC;SVTYPE=LINE1;SVLEN=6018;MEINFO=L1Ta1d,1,6019,+;DIFF=0.09:t231c,t254a,t297g,n338-339,n345,n363,n372,g381c,g419a,a423g,c441t,g442a,g446a,c455g,n458-459,n462,c463a,t464g,t465c,n467-468,c478t,a479g,n480,n482,g483t,n484-485,c491t,n499,t500a,n501-502,n504-506,n509-511,c512a,n515-515,n518,n520-521,n523,g524a,c526a,n529-6019;LP=19;RP=14;RA=0.441;IS…	.	.	.	0.000150105	.	.	.
3	134165716	TSD=null;ASSESS=4;INTERNAL=NM_002958,INTRONIC;SVTYPE=LINE1;SVLEN=6017;MEINFO=L1Ta1d,1,6018,-;DIFF=0.1:g53a,t231c,t254a,c324a,n337-6019;LP=28;RP=32;RA=-0.193;ISTP=0;PRIOR=false;SR=17;GENE=RYK;AF=0.000599042;AC=3	0.000599042	.	.	0.00030021	.	.	.
3	134557404	TSD=TTTTTTTTTTTTTTTTTTTTTTTTTTTT;ASSESS=5;INTERNAL=CEP63,INTRONIC;SVTYPE=LINE1;SVLEN=6009;MEINFO=L1Ambig,9,6018,+;DIFF=0.06:n1-4672,t4887c,a4898g,t4937a,g4957a,c4977t,a5006c,n5017-6019;LP=3;RP=12;RA=-2;ISTP=0;PRIOR=false;SR=21;GENE=CEP63	.	.	0.0382194	.	.	.	.
3	134817205	TSD=AAAAATAAAGTTTGA;ASSESS=5;INTERNAL=NM_004441,INTRONIC;SVTYPE=LINE1;SVLEN=6015;MEINFO=L1Ta1d,4,6019,+;DIFF=0.12:n1-4,g38c,n450-6019;LP=16;RP=11;RA=0.541;ISTP=0;PRIOR=false;SR=22;GENE=EPHB1;AF=0.000199681;AC=1	0.000199681	.	.	.	.	.	.
3	134866332	TSD=AAAGAAAGAGTCACTCG;ASSESS=5;INTERNAL=EPHB1,INTRONIC;SVTYPE=LINE1;SVLEN=6015;MEINFO=L1Ta1d,4,6019,+;DIFF=0.1:n1-3,t231c,t254a,t298a,n359-6019;LP=24;RP=6;RA=2;ISTP=0;PRIOR=false;SR=9;AF=0.000150105;AC=1	.	.	.	0.000150105	.	.	.
3	134986384	TSD=GACAAGGCTTTCTT;ASSESS=5;INTERNAL=NM_004441,INTRONIC;SVTYPE=LINE1;SVLEN=6018;MEINFO=L1Ambig,1,6019,-;DIFF=0.11:n1-3,i73g,c115a,c143t,g167a,t231c,t254a,c257t,g352a,n401-6019;LP=12;RP=13;RA=-0.115;ISTP=0;PRIOR=false;SR=13;GENE=EPHB1;AF=0.000199681;AC=1	0.000199681	.	.	.	.	.	.
3	136106951	TSD=AAAAAAAAAAAAAAAAAAAAAAAAA;ASSESS=5;INTERNAL=NM_181897,INTRONIC;SVTYPE=LINE1;SVLEN=6019;MEINFO=L1Ta1d,0,6019,+;DIFF=0.09:g167a,t231c,t254a,c324a,n368,n431-6019;LP=17;RP=6;RA=1.503;ISTP=0;PRIOR=false;SR=3;GENE=PPP2R3A;AF=0.0109824;AC=55	0.0109824	.	.	.	.	.	.
3	136106970	TSD=null;ASSESS=1;INTERNAL=NM_181897,INTRONIC;SVTYPE=LINE1;SVLEN=6017;MEINFO=L1Ta1d,1,6018,-;DIFF=0.11:g167a,t231c,t254a,c324a,n422-6019;LP=23;RP=11;RA=1.064;ISTP=-1;PRIOR=false;SR=0	.	0.00143266	.	.	.	.	.
3	136539885	TSD=TACTGAAAATCTT;ASSESS=5;INTERNAL=NM_005862,INTRONIC;SVTYPE=LINE1;SVLEN=6017;MEINFO=L1Ta1d,2,6019,-;DIFF=0.12:n1,t231c,t254a,a423g,n471-6019;LP=6;RP=18;RA=-1.585;ISTP=0;PRIOR=false;SR=13;GENE=STAG1;AF=0.000199681;AC=1	0.000199681	.	.	.	.	.	.
3	136930231	TSD=GAAAGTTGAGAAGGA;ASSESS=5;INTERNAL=NM_001291999,INTRONIC;SVTYPE=LINE1;SVLEN=6018;MEINFO=L1Ambig,1,6019,+;DIFF=0.11:n1-14,i73g,c115a,g167a,t231c,t254a,c257t,g352a,n435-6019;LP=16;RP=10;RA=0.678;ISTP=0;PRIOR=false;SR=12;GENE=NCK1;AF=0.000199681;AC=1	0.000199681	.	.	0.000150105	.	.	.
3	137607150	TSD=CCGATGGATTTTA;ASSESS=5;INTERNAL=null,null;SVTYPE=LINE1;SVLEN=6019;MEINFO=L1Ambig,0,6019,-;DIFF=0.06:n1-3,i73g,c115a,g167a,t231c,t254a,c257t,g352a,n378-6019;LP=1;RP=19;RA=-4.248;ISTP=0;PRIOR=false;SR=10;AF=0.000199681;AC=1	0.000199681	.	.	.	.	.	.
3	138854436	TSD=CCCAGGTGTTATTTTCT;ASSESS=5;INTERNAL=LINC01391,TERMINATOR;SVTYPE=LINE1;SVLEN=6016;MEINFO=L1Ta1d,3,6019,-;DIFF=0.1:t231c,t254a,c324a,n399-6019;LP=11;RP=13;RA=-0.241;ISTP=0;PRIOR=false;SR=17;AF=0.000150105;AC=1	.	.	.	0.000150105	.	.	.
3	139325584	TSD=null;ASSESS=3;INTERNAL=null,null;SVTYPE=LINE1;SVLEN=6010;MEINFO=L1Ta1d,8,6018,+;DIFF=0.07:n1-7,c37t,g61a,t231c,t254a,n258,n302-6019;LP=84;RP=78;RA=0.107;ISTP=0;PRIOR=false;SR=16	.	.	.	.	0.031746	.	.
3	139325599	TSD=AAAATGAGATTTGGG;ASSESS=5;INTERNAL=null,null;SVTYPE=LINE1;SVLEN=6013;MEINFO=L1Ta1d,6,6019,+;DIFF=0.1:n1-7,c37t,g61a,t231c,t254a,n445-6019;LP=775;RP=584;RA=0.408;ISTP=0;PRIOR=false;SR=393	0.033746	0.0315186	0.0022482	0.0154608	.	0.0443478	.
3	141581186	TSD=null;ASSESS=4;INTERNAL=RASA2,INTRONIC;SVTYPE=LINE1;SVLEN=6007;MEINFO=L1Ta1d,12,6019,+;DIFF=0.02:n1-39,n144-6019;LP=5;RP=1;RA=2.322;ISTP=-1;PRIOR=false;SR=3	.	.	.	.	.	.	1.00737e-05
3	142420712	TSD=GTTTTAAGTAATTTTTTT;ASSESS=5;INTERNAL=NM_001282859,INTRONIC;SVTYPE=LINE1;SVLEN=6018;MEINFO=L1Ta1d,1,6019,-;DIFF=0.1:g53a,c90t,t231c,t254a,c324a,n442-470,n494,c529a,n548,n564,n586,n621-6019;LP=7;RP=16;RA=-1.193;ISTP=0;PRIOR=false;SR=14;GENE=XRN1;AF=0.000199681;AC=1	0.000199681	.	.	.	.	.	.
3	142695624	TSD=AAAAAAGAATAACAGG;ASSESS=5;INTERNAL=PLS1,INTRONIC;SVTYPE=LINE1;SVLEN=6019;MEINFO=L1Ta1d,0,6019,+;DIFF=0.08:n1-2,t231c,t254a,n275,g364a,n379-6019;LP=14;RP=16;RA=-0.193;ISTP=0;PRIOR=false;SR=12;AF=0.000150105;AC=1	.	.	.	0.000150105	.	.	.
3	142906612	TSD=CTCTAAAGCTTTTT;ASSESS=5;INTERNAL=PCOLCE2,PROMOTER;SVTYPE=LINE1;SVLEN=6018;MEINFO=L1Ta1d,1,6019,-;DIFF=0.05:n3,t82g,g167a,t231c,t254a,t290g,n322,n346-6019;LP=6;RP=55;RA=-3.196;ISTP=0;PRIOR=false;SR=31;AF=0.000450315;AC=3	.	.	.	0.000450315	.	.	.
3	145945686	TSD=AAAATGATATGGTACA;ASSESS=5;INTERNAL=null,null;SVTYPE=LINE1;SVLEN=6019;MEINFO=L1Ta1d,0,6019,+;DIFF=0.1:t231c,t254a,n605-6019;LP=195;RP=119;RA=0.713;ISTP=0;PRIOR=false;SR=148	0.00479233	0.00859599	.	0.0147103	0.00793651	0.00348432	.
3	146516225	TSD=AAAAAAATTAAATGTA;ASSESS=5;INTERNAL=PLSCR1,INTRONIC;SVTYPE=LINE1;SVLEN=6019;MEINFO=L1Ta1d,0,6019,+;DIFF=0.1:t231c,t254a,c324a,n419,c421a,n455,n459,n482,n486-6019;LP=19;RP=9;RA=1.078;ISTP=0;PRIOR=false;SR=12;AF=0.000150105;AC=1	.	.	.	0.000150105	.	.	.
3	146570515	TSD=TGGATTATGCTTCTT;ASSESS=5;INTERNAL=null,null;SVTYPE=LINE1;SVLEN=6015;MEINFO=L1Ambig,4,6019,-;DIFF=0.11:n1-4,i73g,g142t,t231c,t254a,c282t,g352a,t361a,g462a,n474-6019;LP=25;RP=31;RA=-0.31;ISTP=0;PRIOR=false;SR=20	0.00219649	0.00143266	.	0.00315221	0.00793651	0.00956522	.
3	147255005	TSD=CACACTGTGAAATTTT;ASSESS=5;INTERNAL=null,null;SVTYPE=LINE1;SVLEN=6018;MEINFO=L1Ta1d,1,6019,-;DIFF=0.11:g210c,t231c,g252a,g253t,t254a,a388g,n466-6019;LP=8;RP=17;RA=-1.087;ISTP=0;PRIOR=false;SR=15;GENE=LOC107986139;AF=0.000199681;AC=1	0.000199681	.	.	.	.	.	.
3	147491889	TSD=AAAGGAAAATGTTTTG;ASSESS=5;INTERNAL=NR_121655,INTRONIC;SVTYPE=LINE1;SVLEN=6012;MEINFO=L1Ta,7,6019,+;DIFF=0.11:n1-5564,n5869,n5902;LP=11;RP=12;RA=-0.126;ISTP=0;PRIOR=false;SR=21;GENE=LOC440982;AF=0.000199681;AC=1	0.000199681	.	.	.	.	.	.
3	147493494	TSD=CTAACAGACTTTCTT;ASSESS=5;INTERNAL=LOC440982,INTRONIC;SVTYPE=LINE1;SVLEN=6018;MEINFO=L1Ta1d,1,6019,-;DIFF=0.08:g3a,g210c,t231c,t254a,n370-6019;LP=14;RP=20;RA=-0.515;ISTP=0;PRIOR=false;SR=10;AF=0.000150105;AC=1	.	.	.	0.000150105	.	.	.
3	148282135	TSD=null;ASSESS=4;INTERNAL=null,null;SVTYPE=LINE1;SVLEN=6017;MEINFO=L1Ta1d,1,6018,-;DIFF=0.09:a140g,t231c,t254a,n315-6019;LP=9;RP=12;RA=-0.415;ISTP=0;PRIOR=false;SR=4;GENE=LOC105374149;AF=0.000199681;AC=1	0.000199681	.	.	.	.	.	.
3	151430767	TSD=CCCGAAGATCTT;ASSESS=5;INTERNAL=NM_053002,INTRONIC;SVTYPE=LINE1;SVLEN=6015;MEINFO=L1Ambig,4,6019,-;DIFF=0.15:n1-3,n5,g38a,i72c,g83c,t153c,t231c,t254a,g313a,g352a,c445t,n598-6019;LP=13372;RP=18480;RA=-0.467;ISTP=0;PRIOR=false;SR=14274	0.616214	0.619628	0.705935	0.605224	0.738095	0.682609	.
3	151970313	TSD=TACTCTTCTTTTTTA;ASSESS=5;INTERNAL=null,null;SVTYPE=LINE1;SVLEN=6018;MEINFO=L1Ta1d,1,6019,-;DIFF=0.1:n1-3,c21t,t149g,t153c,t231c,t254a,c269t,g352a,n409-432,t496g,n497,n526,g562a,n583-6019;LP=1042;RP=1686;RA=-0.694;ISTP=0;PRIOR=false;SR=1366	0.0599042	0.0659026	0.0314748	0.0519364	0.031746	0.0452174	.
3	152049981	TSD=AAAAGTGTTCATAG;ASSESS=5;INTERNAL=null,null;SVTYPE=LINE1;SVLEN=6015;MEINFO=L1Ta1d,4,6019,+;DIFF=0.08:n1-3,c144g,t231c,t254a,n335,n473-6019;LP=13;RP=8;RA=0.7;ISTP=0;PRIOR=false;SR=9;AF=0.000199681;AC=1	0.000199681	.	.	.	.	.	.
3	152069689	TSD=TAACACTTGTATTATT;ASSESS=5;INTERNAL=null,null;SVTYPE=LINE1;SVLEN=6019;MEINFO=L1Ta1d,0,6019,-;DIFF=0.09:t231c,t254a,c324a,n493-6019;LP=38;RP=75;RA=-0.981;ISTP=0;PRIOR=false;SR=61	0.00599042	0.00787966	.	0.0333233	.	.	.
3	152347314	TSD=GAAAAGTAAC;ASSESS=5;INTERNAL=NM_207293,INTRONIC;SVTYPE=LINE1;SVLEN=6019;MEINFO=L1Ta1d,0,6019,+;DIFF=0.12:n1-12,t231c,c445t,n470-6019;LP=28;RP=19;RA=0.559;ISTP=0;PRIOR=false;SR=15;GENE=MBNL1;AF=0.000199681;AC=1	0.000199681	.	.	0.00090063	.	.	.
3	152807537	TSD=AAACAGAGTATTGTC;ASSESS=5;INTERNAL=null,null;SVTYPE=LINE1;SVLEN=6015;MEINFO=L1Ta1d,4,6019,+;DIFF=0.09:n1-4,n365-6019;LP=17;RP=7;RA=1.28;ISTP=0;PRIOR=false;SR=8;AF=0.000199681;AC=1	0.000199681	.	.	.	.	.	.
3	153578255	TSD=AAAAAGTAATTGTCC;ASSESS=5;INTERNAL=null,null;SVTYPE=LINE1;SVLEN=6019;MEINFO=L1Ta1d,0,6019,+;DIFF=0.09:c144g,t231c,t254a,n399-6019;LP=24;RP=11;RA=1.126;ISTP=0;PRIOR=false;SR=12;GENE=LOC105374165;AF=0.000199681;AC=1	0.000199681	.	.	.	.	.	.
3	153976186	TSD=AAGAAAAAAAAAA;ASSESS=5;INTERNAL=ARHGEF26-AS1,TERMINATOR;SVTYPE=LINE1;SVLEN=6007;MEINFO=L1Ambig,12,6019,+;DIFF=0.09:n1-12,g38a,i72c,g83c,t153c,t231c,t254a,g313a,g352a,n370-6019;LP=13;RP=6;RA=1.115;ISTP=0;PRIOR=false;SR=9;AF=0.00405284;AC=27	.	.	.	0.00405284	.	.	.
3	155588433	TSD=CCCACTTCGGGCTTTC;ASSESS=5;INTERNAL=NM_014996,INTRONIC;SVTYPE=LINE1;SVLEN=6017;MEINFO=L1Ta,2,6019,-;DIFF=0.11:n1-5524,n5656,n5675-5733;LP=11;RP=24;RA=-1.126;ISTP=0;PRIOR=false;SR=12;GENE=PLCH1;AF=0.000199681;AC=1	0.000199681	.	.	0.000150105	.	.	.
3	155753937	TSD=GCATTCTGATACATTTT;ASSESS=5;INTERNAL=NM_001308229,TERMINATOR;SVTYPE=LINE1;SVLEN=6016;MEINFO=L1Ta1d,3,6019,-;DIFF=0.12:n1-2,t231c,t254a,c327t,n404,n409,n412,n420,n430,n443,t450g,n476,n490-491,n511,n521,n531-6019;LP=17;RP=15;RA=0.181;ISTP=0;PRIOR=false;SR=14;AF=0.000199681;AC=1	0.000199681	.	.	.	.	.	.
3	156238721	TSD=AACATGAGTAATTTTTCT;ASSESS=5;INTERNAL=KCNAB1,INTRONIC;SVTYPE=LINE1;SVLEN=6019;MEINFO=L1Ta1d,0,6019,-;DIFF=0.1:t231c,t254a,c324a,n413,n451-6019;LP=79;RP=119;RA=-0.591;ISTP=0;PRIOR=false;SR=106;AF=0.00120084;AC=8	.	.	.	0.00120084	.	.	.
3	156695843	TSD=TTTTTTTTTTTTTTTTT;ASSESS=5;INTERNAL=TIPARP,INTRONIC;SVTYPE=LINE1;SVLEN=6011;MEINFO=L1Ambig,7,6018,+;DIFF=0.06:n1-2935,a2964g,g3000a,n3012-3034,n3111-6019;LP=13;RP=6;RA=1.115;ISTP=0;PRIOR=false;SR=214	.	.	.	.	.	.	0.402589
3	157050746	TSD=AAAAATCTCCT;ASSESS=5;INTERNAL=null,null;SVTYPE=LINE1;SVLEN=6019;MEINFO=L1Ta1d,0,6019,+;DIFF=0.11:t231c,t254a,n373,n400-6019;LP=17;RP=15;RA=0.181;ISTP=0;PRIOR=false;SR=12;AF=0.000199681;AC=1	0.000199681	.	.	.	.	.	.
3	159593054	TSD=CAACATTTTTACCTTCT;ASSESS=5;INTERNAL=SCHIP1,INTRONIC;SVTYPE=LINE1;SVLEN=6015;MEINFO=L1Ta1d,4,6019,-;DIFF=0.08:n1-2,t231c,t254a,n473-6019;LP=6;RP=35;RA=-2.544;ISTP=0;PRIOR=false;SR=21;AF=0.00030021;AC=2	.	.	.	0.00030021	.	.	.
3	160328483	TSD=AAAAAAAAAAAAAAAAAAAAAA;ASSESS=5;INTERNAL=NM_020800,INTRONIC;SVTYPE=LINE1;SVLEN=6014;MEINFO=L1Ambig,4,6018,-;DIFF=0.04:n1-4757,g4767a,g4773a,t4776c,t4785c,g4796c,g4820a,g4827a,c4828t,t4839a,c4850t,t4854a,c4866t,t4887c,a4898g,g4957a,c4977t,a5006g,n5078,n5082,n5085,n5088-5160,a5189g,g5268a,n5311-5600,n5613,a5614g,n5617-5617,n5625,n5633,t5636c,n5647,n5681,n5685,n5709,a5712g,t5737c,n5751-6019;LP=8…	0.000599042	.	.	.	.	.	.
3	160487870	TSD=TATTTTTACACCTTTCTTT;ASSESS=5;INTERNAL=KPNA4,TERMINATOR;SVTYPE=LINE1;SVLEN=6013;MEINFO=L1Ambig,6,6019,-;DIFF=0.08:n1-5,i73g,t231c,t254a,c278t,g294t,g302t,g306t,g307t,n319-6019;LP=23;RP=45;RA=-0.968;ISTP=0;PRIOR=false;SR=39;AF=0.000450315;AC=3	.	.	.	0.000450315	.	.	.
3	160840858	TSD=TGCCTTTCTTTCT;ASSESS=5;INTERNAL=NM_139245,INTRONIC;SVTYPE=LINE1;SVLEN=6019;MEINFO=L1Ta1d,0,6019,-;DIFF=0.1:g167a,t231c,t254a,c324a,n441-6019;LP=10;RP=22;RA=-1.138;ISTP=0;PRIOR=false;SR=10;GENE=PPM1L;AF=0.000199681;AC=1	0.000199681	.	.	.	.	.	.
3	160871929	TSD=CCACTTTTGTATTTTA;ASSESS=5;INTERNAL=NM_139245,INTRONIC;SVTYPE=LINE1;SVLEN=6017;MEINFO=L1Ambig,2,6019,-;DIFF=0.09:i73g,c115a,g167a,t231c,t254a,g256t,g352a,g498a,n511-6019;LP=18;RP=28;RA=-0.637;ISTP=0;PRIOR=false;SR=25;GENE=PPM1L;AF=0.000399361;AC=2	0.000399361	.	.	.	.	.	.
3	161657699	TSD=TGAACTTAATTATT;ASSESS=5;INTERNAL=null,null;SVTYPE=LINE1;SVLEN=6017;MEINFO=L1Ambig,2,6019,-;DIFF=0.06:n1-2,g38a,i72c,g83c,t153c,t231c,t254a,g313a,g352a,n364-6019;LP=2;RP=52;RA=-4.7;ISTP=0;PRIOR=false;SR=40	0.000199681	.	.	0.00030021	.	0.00173913	.
3	163643897	TSD=null;ASSESS=3;INTERNAL=null,null;SVTYPE=LINE1;SVLEN=6018;MEINFO=L1Ta1d,1,6019,-;DIFF=0.09:g210c,t231c,t254a,a388g,n484-6019;LP=2;RP=41;RA=-4.358;ISTP=-1;PRIOR=false;SR=12;AF=0.000399361;AC=2	0.000399361	.	.	.	.	.	.
3	165648542	TSD=AAAAATACAAAAATT;ASSESS=5;INTERNAL=BCHE,TERMINATOR;SVTYPE=LINE1;SVLEN=6017;MEINFO=L1Ta1d,2,6019,+;DIFF=0.07:n1-2,t231c,t254a,c284t,c300t,n319,n323-324,n326,n330-331,n336,n342-343,n348-349,g356t,n359-361,n363,t374a,n381,n383,n390,n395,n397,n399,n410,n419,n427-6019;LP=11;RP=2;RA=2.459;ISTP=0;PRIOR=false;SR=12;AF=0.000150105;AC=1	.	.	.	0.000150105	.	.	.
3	166852074	TSD=AAGGTTTC;ASSESS=5;INTERNAL=null,null;SVTYPE=LINE1;SVLEN=6019;MEINFO=L1Ta1d,0,6019,+;DIFF=0.1:n1-2,t231c,t254a,c327t,c359a,n538-6019;LP=23;RP=7;RA=1.716;ISTP=0;PRIOR=false;SR=11;AF=0.000199681;AC=1	0.000199681	.	.	.	.	.	.
3	167282547	TSD=null;ASSESS=4;INTERNAL=ZBBX,INTRONIC;SVTYPE=LINE1;SVLEN=6015;MEINFO=L1Ambig,4,6019,+;DIFF=0.05:n1-5162,c5207t,n5239-5332,c5336t,c5391t,n5406-5491,t5499c,c5507t,c5508a,n5535-5608,n5662-5737,c5744t,c5765t,n5786-6019;LP=14;RP=4;RA=1.807;ISTP=-1;PRIOR=false;SR=3	.	.	.	.	.	.	1.00811e-05
3	168080135	TSD=null;ASSESS=3;INTERNAL=NM_001308155,INTRONIC;SVTYPE=LINE1;SVLEN=6009;MEINFO=L1Ta,9,6018,+;DIFF=0.05:n1-5589,n5723,n5901;LP=3;RP=10;RA=-1.737;ISTP=0;PRIOR=false;SR=4;GENE=GOLIM4;AF=0.000199681;AC=1	0.000199681	.	.	.	.	.	.
3	168275593	TSD=GAGAACGTTCTT;ASSESS=5;INTERNAL=NR_021485,INTRONIC;SVTYPE=LINE1;SVLEN=6019;MEINFO=L1Ta1d,0,6019,-;DIFF=0.12:n1-2,t231c,t254a,g492a,n561-6019;LP=65;RP=111;RA=-0.772;ISTP=0;PRIOR=false;SR=79	0.00139776	0.00358166	.	0.00750525	.	.	.
3	168808606	TSD=AAAGAAACACATTTCAG;ASSESS=5;INTERNAL=NR_021485,INTRONIC;SVTYPE=LINE1;SVLEN=6017;MEINFO=L1Ta1d,2,6019,+;DIFF=0.09:n1,t231c,t254a,n450,n494-6019;LP=19;RP=9;RA=1.078;ISTP=0;PRIOR=false;SR=13;GENE=EGFEM1P;AF=0.000199681;AC=1	0.000199681	.	.	0.00030021	.	.	.
3	169267935	TSD=AAGACATATAAGCC;ASSESS=5;INTERNAL=NM_004991,INTRONIC;SVTYPE=LINE1;SVLEN=6019;MEINFO=L1Ta,0,6019,+;DIFF=0.1:n1-5634;LP=14;RP=18;RA=-0.363;ISTP=0;PRIOR=false;SR=9	0.00319489	0.000716332	.	.	.	0.000869565	.
3	169361617	TSD=GATCCTATTGTT;ASSESS=5;INTERNAL=NM_004991,INTRONIC;SVTYPE=LINE1;SVLEN=6018;MEINFO=L1Ta1d,1,6019,-;DIFF=0.11:c144g,t231c,t254a,n572-6019;LP=13;RP=20;RA=-0.621;ISTP=0;PRIOR=false;SR=11;GENE=MECOM;AF=0.000199681;AC=1	0.000199681	.	.	.	.	.	.
3	169467069	TSD=AAGAAACACCAAACTG;ASSESS=5;INTERNAL=LOC105374205,5_UTR;SVTYPE=LINE1;SVLEN=6018;MEINFO=L1Ta,1,6019,+;DIFF=0.08:n1-5597,n5628,n5648,n5657,n5659-5660,n5662,n5670,n5677,n5686,n5689,n5691,t5693a,n5704,n5706,n5708,n5711,n5713-5714,n5724,n5726,n5730,n5732-5733,n5739-5740,n5745,n5747-5789,t5915a,g5937a;LP=16;RP=6;RA=1.415;ISTP=0;PRIOR=false;SR=10;AF=0.000150105;AC=1	.	.	.	0.000150105	.	.	.
3	170700241	TSD=GAACCAAAGGATTTT;ASSESS=5;INTERNAL=LOC101928583,INTRONIC;SVTYPE=LINE1;SVLEN=6018;MEINFO=L1Ta,1,6019,-;DIFF=0.12:n1-5538,c5745a,n5767,g5770t,n5774,n5781,n5785,n5787,g5789t;LP=58;RP=52;RA=0.158;ISTP=0;PRIOR=false;SR=67;AF=0.00060042;AC=4	.	.	.	0.00060042	.	.	.
3	170765424	TSD=null;ASSESS=0;INTERNAL=null,null;SVTYPE=LINE1;SVLEN=6010;MEINFO=L1Ta1d,8,6018,+;DIFF=0.08:n1-7,t231c,t254a,c327t,n384,n400,n409,n411,n451,n463-6019;LP=4;RP=18;RA=-2.17;ISTP=-1;PRIOR=false;SR=0;AF=0.000199681;AC=1	0.000199681	.	.	.	.	.	.
3	171309686	TSD=AAGAATGTAAAGGGT;ASSESS=5;INTERNAL=NM_001161560,INTRONIC;SVTYPE=LINE1;SVLEN=6016;MEINFO=L1Ta1d,3,6019,+;DIFF=0.08:n1-4,t231c,t254a,n323,n326,n341,n383-6019;LP=12;RP=9;RA=0.415;ISTP=0;PRIOR=false;SR=14;GENE=TNIK;AF=0.000199681;AC=1	0.000199681	.	.	.	.	.	.
3	172636922	TSD=CTCTTTTGCTTATT;ASSESS=5;INTERNAL=NM_001146276,INTRONIC;SVTYPE=LINE1;SVLEN=6013;MEINFO=L1Ta1d,6,6019,-;DIFF=0.1:n1-4,n333,n497-6019;LP=24;RP=38;RA=-0.663;ISTP=0;PRIOR=false;SR=34	0.000798722	0.00143266	.	0.00195137	.	0.000869565	.
3	173031344	TSD=CACAAATATTATATCTT;ASSESS=5;INTERNAL=NM_031955,INTRONIC;SVTYPE=LINE1;SVLEN=6017;MEINFO=L1Ambig,2,6019,-;DIFF=0.13:n1-3,i73g,c143t,g167a,t231c,t254a,c257t,g352a,n425-6019;LP=270;RP=387;RA=-0.519;ISTP=0;PRIOR=false;SR=415	0.0239617	0.023639	.	0.0618433	.	.	.
3	173452213	TSD=TTTTTTTTTTT;ASSESS=5;INTERNAL=NLGN1,INTRONIC;SVTYPE=LINE1;SVLEN=6011;MEINFO=L1Ambig,7,6018,+;DIFF=0.02:n1-3264,n3299,n3343-3345,n3415-6019;LP=9;RP=10;RA=-0.152;ISTP=0;PRIOR=false;SR=45;GENE=NLGN1	.	.	0.00989209	.	.	.	.
3	175592299	TSD=dTTCTTTTCTTTTTT;ASSESS=5;INTERNAL=NAALADL2,INTRONIC;SVTYPE=LINE1;SVLEN=6015;MEINFO=L1Ambig,3,6018,+;DIFF=0.01:n1-4623,c4641a,g4716a,t4719c,g4766a,n4775-6019;LP=29;RP=5;RA=2.536;ISTP=0;PRIOR=false;SR=51;GENE=NAALADL2	.	.	0.00539568	.	.	.	.
3	177710671	TSD=AGAATCTTCAG;ASSESS=5;INTERNAL=NR_047568,INTRONIC;SVTYPE=LINE1;SVLEN=6019;MEINFO=L1Ta1d,0,6019,+;DIFF=0.13:a52t,t231c,t254a,c369t,n423-6019;LP=35;RP=25;RA=0.485;ISTP=0;PRIOR=false;SR=29	0.00139776	0.00143266	.	.	.	.	.
3	178664928	TSD=AGGAAATAATTTT;ASSESS=5;INTERNAL=KCNMB2,INTRONIC;SVTYPE=LINE1;SVLEN=6012;MEINFO=L1Ta1d,7,6019,-;DIFF=0.06:n1-7,t231c,t254a,n295-6019;LP=3;RP=12;RA=-2;ISTP=0;PRIOR=false;SR=14;AF=0.000150105;AC=1	.	.	.	0.000150105	.	.	.
3	180033889	TSD=AATATCTGTT;ASSESS=5;INTERNAL=PEX5L,INTRONIC;SVTYPE=LINE1;SVLEN=6017;MEINFO=L1Ta1d,2,6019,-;DIFF=0.08:n1-2,t231c,t254a,c324a,n415-6019;LP=11;RP=20;RA=-0.862;ISTP=0;PRIOR=false;SR=14;AF=0.000150105;AC=1	.	.	.	0.000150105	.	.	.
3	180127378	TSD=AAGACAGAAATTAC;ASSESS=5;INTERNAL=PEX5L-AS2,TERMINATOR;SVTYPE=LINE1;SVLEN=6018;MEINFO=L1Ta1d,1,6019,+;DIFF=0.1:n1,g180a,g210c,t231c,t254a,n355-6019;LP=16;RP=12;RA=0.415;ISTP=0;PRIOR=false;SR=16;AF=0.00030021;AC=2	.	.	.	0.00030021	.	.	.
3	181546097	TSD=TCCATGTTCACTTTTT;ASSESS=5;INTERNAL=NR_075093,INTRONIC;SVTYPE=LINE1;SVLEN=6018;MEINFO=L1Ta,1,6019,-;DIFF=0.12:n1-5539;LP=14;RP=7;RA=1;ISTP=0;PRIOR=false;SR=15;GENE=SOX2-OT;AF=0.000199681;AC=1	0.000199681	.	.	.	.	.	.
3	182204657	TSD=CCTATATATTTT;ASSESS=5;INTERNAL=null,null;SVTYPE=LINE1;SVLEN=6017;MEINFO=L1Ta1d,2,6019,-;DIFF=0.11:g53a,c90t,t231c,t254a,c324a,n475-6019;LP=12;RP=18;RA=-0.585;ISTP=0;PRIOR=false;SR=16	0.000199681	0.000716332	.	.	.	.	.
3	183447042	TSD=TATTTTGAATTTTT;ASSESS=5;INTERNAL=LINC00888,PROMOTER;SVTYPE=LINE1;SVLEN=6007;MEINFO=L1Ta,12,6019,-;DIFF=0.1:n1-5686;LP=33;RP=46;RA=-0.479;ISTP=0;PRIOR=false;SR=44;AF=0.000750525;AC=5	.	.	.	0.000750525	.	.	.
3	184050576	TSD=TCTTTCCTTTATTTCTTT;ASSESS=5;INTERNAL=NM_130770,PROMOTER;SVTYPE=LINE1;SVLEN=6018;MEINFO=L1Ta,1,6019,-;DIFF=0.1:n1-5598,n5676,n5693,a5837c,c5945t;LP=9;RP=14;RA=-0.637;ISTP=0;PRIOR=false;SR=11	0.000199681	0.000716332	.	.	.	.	.
3	186654352	TSD=AGAAAATCAAAGGATGGG;ASSESS=5;INTERNAL=NM_001308077,TERMINATOR;SVTYPE=LINE1;SVLEN=6016;MEINFO=L1Ta1d,3,6019,+;DIFF=0.11:c205t,t231g,t254a,n442-6019;LP=13469;RP=9498;RA=0.504;ISTP=0;PRIOR=false;SR=11518	0.482827	0.490688	0.341277	0.683278	0.357143	0.368696	.
3	187786361	TSD=AAGAATCACAATCTT;ASSESS=5;INTERNAL=null,null;SVTYPE=LINE1;SVLEN=6019;MEINFO=L1Ta1d,0,6019,+;DIFF=0.1:n1-2,t231c,t254a,c327t,n462-6019;LP=40;RP=27;RA=0.567;ISTP=0;PRIOR=false;SR=14	0.000399361	0.00143266	.	.	.	.	.
3	188274044	TSD=GAAAAGTAAACCCTTCTC;ASSESS=5;INTERNAL=LPP,INTRONIC;SVTYPE=LINE1;SVLEN=6007;MEINFO=L1Ta1d,12,6019,+;DIFF=0.09:n1-12,t231c,t254a,t297g,n305-342,n347,n355,n361,n366,a423g,n494-6019;LP=16;RP=8;RA=1;ISTP=0;PRIOR=false;SR=10;AF=0.000150105;AC=1	.	.	.	0.000150105	.	.	.
3	188623275	TSD=null;ASSESS=4;INTERNAL=LPP,INTRONIC;SVTYPE=LINE1;SVLEN=6017;MEINFO=L1Ta1d,1,6018,-;DIFF=0.12:g210c,t231c,t254a,g352t,a388g,n452,n472-6019;LP=16;RP=15;RA=0.093;ISTP=0;PRIOR=false;SR=6;AF=0.000150105;AC=1	.	.	.	0.000150105	.	.	.
3	189026316	TSD=CTCTTCTTCTTCTT;ASSESS=5;INTERNAL=null,null;SVTYPE=LINE1;SVLEN=6019;MEINFO=L1Ta1d,0,6019,-;DIFF=0.08:g167a,t231c,t254a,c324a,n411,n423,n492-6019;LP=15;RP=20;RA=-0.415;ISTP=0;PRIOR=false;SR=16;GENE=LOC107986167;AF=0.000199681;AC=1	0.000199681	.	.	.	.	.	.
3	189124836	TSD=AAGAAATTGTTC;ASSESS=5;INTERNAL=null,null;SVTYPE=LINE1;SVLEN=6018;MEINFO=L1Ambig,1,6019,+;DIFF=0.1:n1,i73g,t231c,c251t,t254a,g352a,n408-409,n411,n422,n430,n444,n451,n511,n531-6019;LP=23;RP=9;RA=1.354;ISTP=0;PRIOR=false;SR=16	.	0.000716332	.	.	.	.	.
3	190553448	TSD=AAAAAAATTTTTTTT;ASSESS=5;INTERNAL=IL1RAP,INTRONIC;SVTYPE=LINE1;SVLEN=6017;MEINFO=L1Ta1d,2,6019,-;DIFF=0.09:n1,g210c,t231c,t254a,n371-6019;LP=7;RP=18;RA=-1.363;ISTP=0;PRIOR=false;SR=10;AF=0.000150105;AC=1	.	.	.	0.000150105	.	.	.
3	191779599	TSD=CATTTTGACATTTTTT;ASSESS=5;INTERNAL=null,null;SVTYPE=LINE1;SVLEN=6017;MEINFO=L1Ta1d,2,6019,-;DIFF=0.12:n1-2,t231c,t254a,c327t,n629-6019;LP=19;RP=33;RA=-0.796;ISTP=0;PRIOR=false;SR=22;AF=0.000399361;AC=2	0.000399361	.	.	0.000150105	.	.	.
3	192190106	TSD=TAAAGTTATAAGAAA;ASSESS=5;INTERNAL=NM_004113,INTRONIC;SVTYPE=LINE1;SVLEN=6018;MEINFO=L1Ambig,1,6019,+;DIFF=0.09:n1-3,i73g,c115a,c143t,g167a,t231c,t254a,c257t,g352a,n418-424,n475,n547,n575-6019;LP=17;RP=8;RA=1.087;ISTP=0;PRIOR=false;SR=12;GENE=FGF12;AF=0.000199681;AC=1	0.000199681	.	.	.	.	.	.
3	192591376	TSD=CTCGGCTCCCAGTTTT;ASSESS=5;INTERNAL=NM_004113,INTRONIC;SVTYPE=LINE1;SVLEN=6019;MEINFO=L1Ambig,0,6019,-;DIFF=0.08:c37t,i73g,g156a,t254a,t405c,g419a,n446-6019;LP=5;RP=19;RA=-1.926;ISTP=0;PRIOR=false;SR=10	0.00019984	0.000716332	.	.	.	.	.
3	196684967	TSD=GCTCCTTGGTTTCTT;ASSESS=5;INTERNAL=null,null;SVTYPE=LINE1;SVLEN=6018;MEINFO=L1Ta,1,6019,-;DIFF=0.08:n1-5547,n5582,n5698-5712,g5719a;LP=15;RP=15;RA=0;ISTP=0;PRIOR=false;SR=10;AF=0.000199681;AC=1	0.000199681	.	.	.	.	.	.
4	5280911	TSD=AAAAACAAAAGCA;ASSESS=5;INTERNAL=NM_018401,INTRONIC;SVTYPE=LINE1;SVLEN=6019;MEINFO=L1Ta1d,0,6019,+;DIFF=0.09:n1-2,t231c,t254a,n336-427,n475,n578-6019;LP=21;RP=15;RA=0.485;ISTP=0;PRIOR=false;SR=16;GENE=STK32B;AF=0.000199681;AC=1	0.000199681	.	.	.	.	.	.
4	5908274	TSD=ACAAAGTAACAGTGTA;ASSESS=5;INTERNAL=MIR378D1,TERMINATOR;SVTYPE=LINE1;SVLEN=6019;MEINFO=L1Ta,0,6019,+;DIFF=0.07:n1-5698,n5828;LP=50;RP=23;RA=1.12;ISTP=0;PRIOR=false;SR=34;AF=0.000450315;AC=3	.	.	.	0.000450315	.	.	.
4	7778040	TSD=GTGTCTCATGTCTT;ASSESS=5;INTERNAL=NM_198595,INTRONIC;SVTYPE=LINE1;SVLEN=6018;MEINFO=L1Ta,1,6019,-;DIFF=0.08:n1-5574,n5606,n5733,n5739-5740,c5744a,n5745,n5752,n5757,n5759-5760,n5764-5766,n5768,n5775-5776,n5779-5780,t5794a,i5879g,c5945t;LP=10;RP=26;RA=-1.379;ISTP=0;PRIOR=false;SR=13;GENE=AFAP1-AS1;AF=0.000199681;AC=1	0.000199681	.	.	.	.	.	.
4	10378582	TSD=AAAAAAAAAATTTATCCA;ASSESS=5;INTERNAL=null,null;SVTYPE=LINE1;SVLEN=6019;MEINFO=L1Ta1d,0,6019,+;DIFF=0.07:t231c,t254a,n363-440,n549,t550c,n591-6019;LP=16;RP=5;RA=1.678;ISTP=0;PRIOR=false;SR=11;AF=0.000199681;AC=1	0.000199681	.	.	.	.	.	.
4	10631070	TSD=CGGAATCAGCATTTCT;ASSESS=5;INTERNAL=NM_052964,INTRONIC;SVTYPE=LINE1;SVLEN=6019;MEINFO=L1Ta1d,0,6019,-;DIFF=0.1:a52t,t231c,t254a,t333g,n349-392,n498,n576,n589-6019;LP=391;RP=613;RA=-0.649;ISTP=0;PRIOR=false;SR=464	0.0253594	0.0229226	0.0804856	0.0130591	0.0634921	0.0582609	.
4	10700769	TSD=TAAAAATCCCTATGTC;ASSESS=5;INTERNAL=CLNK,PROMOTER;SVTYPE=LINE1;SVLEN=6015;MEINFO=L1Ta,3,6018,+;DIFF=0.09:n1-4719,t4729c,g4752c,c4762a,g4769a,c4866t,n4871-4937,g4957a,c4977t,a5006c,g5059a,n5087-5326,a5631g,n5635-5641;LP=12;RP=12;RA=0;ISTP=0;PRIOR=false;SR=11;AF=0.000150105;AC=1	.	.	.	0.000150105	.	.	.
4	10787693	TSD=null;ASSESS=3;INTERNAL=CLNK,PROMOTER;SVTYPE=LINE1;SVLEN=6017;MEINFO=L1Ta,1,6018,+;DIFF=0.09:n1-4358,a4363g,c4374g,n4668-5394,a5441c,g5454a,t5535g,g5538c,n5546-5554,t5578c,g5586a,t5593a,c5595t,c5603a,n5605,t5628c,a5632t,n5641-5649,a5653c,t5657c,g5658a,c5670t,t5693c,g5701a,a5705g,n5712-5738;LP=12;RP=19;RA=-0.663;ISTP=0;PRIOR=false;SR=5;AF=0.000150105;AC=1	.	.	.	0.000150105	.	.	.
4	13048300	TSD=GGAACTTTCTTTAGTTTT;ASSESS=5;INTERNAL=null,null;SVTYPE=LINE1;SVLEN=6018;MEINFO=L1Ta1d,1,6019,-;DIFF=0.09:n1-2,t231c,t254a,n387,n418-6019;LP=42;RP=64;RA=-0.608;ISTP=0;PRIOR=false;SR=44;AF=0.000599042;AC=3	0.000599042	.	.	.	.	.	.
4	13594187	TSD=AAGCAAATGCCTA;ASSESS=5;INTERNAL=NM_148894,INTRONIC;SVTYPE=LINE1;SVLEN=6017;MEINFO=L1Ta1d,2,6019,+;DIFF=0.12:n1-2,t231c,t254a,n302-333,n335,n341,n491-6019;LP=85;RP=53;RA=0.681;ISTP=0;PRIOR=false;SR=62	0.00239617	0.00358166	.	0.0060042	.	.	.
4	15502903	TSD=AAGAAAGAATTGG;ASSESS=5;INTERNAL=NM_001080522,EXON_7;SVTYPE=LINE1;SVLEN=6019;MEINFO=L1Ta1d,0,6019,+;DIFF=0.1:n1-2,t87c,t231c,t254a,n421-6019;LP=26;RP=15;RA=0.794;ISTP=0;PRIOR=false;SR=14;GENE=CC2D2A;AF=0.000199681;AC=1	0.000199681	.	.	.	.	.	.
4	15870558	TSD=TCTTCTGCCTATT;ASSESS=5;INTERNAL=null,null;SVTYPE=LINE1;SVLEN=6018;MEINFO=L1Ta1d,1,6019,-;DIFF=0.13:c197g,g210c,t231c,t254a,n605-6019;LP=328;RP=399;RA=-0.283;ISTP=0;PRIOR=false;SR=345	0.0147764	0.019341	0.0503597	0.0190633	0.047619	0.0217391	.
4	16237026	TSD=AAGATGATATCAACACTG;ASSESS=5;INTERNAL=NR_027696,INTRONIC;SVTYPE=LINE1;SVLEN=6019;MEINFO=L1Ta1d,0,6019,+;DIFF=0.1:n370-6019;LP=248;RP=179;RA=0.47;ISTP=0;PRIOR=false;SR=171	0.0103834	0.010745	.	0.0273191	.	0.00434783	.
4	16412483	TSD=AAAAATCAAAGAAATAG;ASSESS=5;INTERNAL=null,null;SVTYPE=LINE1;SVLEN=6017;MEINFO=L1Ta1d,1,6018,-;DIFF=0.07:g38c,n344-6019;LP=13;RP=1;RA=3.7;ISTP=0;PRIOR=false;SR=11	.	.	.	.	.	0.000869565	.
4	16785144	TSD=AAAAATAAATCCTTTTTCTT;ASSESS=5;INTERNAL=NR_130734,INTRONIC;SVTYPE=LINE1;SVLEN=6016;MEINFO=L1Ta1d,3,6019,-;DIFF=0.08:n1-2,n304-6019;LP=2;RP=21;RA=-3.392;ISTP=0;PRIOR=false;SR=16	.	.	.	0.000150105	.	0.000869565	.
4	16926783	TSD=TAGTTTCTCTTTCTTTT;ASSESS=5;INTERNAL=LDB2,PROMOTER;SVTYPE=LINE1;SVLEN=6018;MEINFO=L1Ta1d,1,6019,-;DIFF=0.07:n1-2,t231c,t254a,n321-6019;LP=3;RP=11;RA=-1.874;ISTP=0;PRIOR=false;SR=10;AF=0.000150105;AC=1	.	.	.	0.000150105	.	.	.
4	17408086	TSD=CCTAAGCCAATTTA;ASSESS=5;INTERNAL=QDPR,TERMINATOR;SVTYPE=LINE1;SVLEN=6017;MEINFO=L1Ta1d,2,6019,-;DIFF=0.12:c360a,n364,n492-6019;LP=14;RP=16;RA=-0.193;ISTP=0;PRIOR=false;SR=14;AF=0.00030021;AC=2	.	.	.	0.00030021	.	.	.
4	18387632	TSD=GAAAAAAGG;ASSESS=5;INTERNAL=null,null;SVTYPE=LINE1;SVLEN=6015;MEINFO=L1Ta1d,3,6018,-;DIFF=0.08:n1-2,g15a,t231c,t254a,n403-477,n628-6019;LP=27;RP=8;RA=1.755;ISTP=0;PRIOR=false;SR=21	0.000798722	0.000716332	.	0.00225158	.	.	.
4	18394558	TSD=CACCTTATAGTTTTCTT;ASSESS=5;INTERNAL=null,null;SVTYPE=LINE1;SVLEN=6016;MEINFO=L1Ta,3,6019,-;DIFF=0.09:n1-5680;LP=23;RP=27;RA=-0.231;ISTP=0;PRIOR=false;SR=30;AF=0.000399361;AC=2	0.000399361	.	.	.	.	.	.
4	20612637	TSD=null;ASSESS=4;INTERNAL=NM_001289135,INTRONIC;SVTYPE=LINE1;SVLEN=6016;MEINFO=L1Ta1d,2,6018,-;DIFF=0.04:n1,t231c,t254a,n270-6019;LP=13;RP=1;RA=3.7;ISTP=0;PRIOR=false;SR=7	.	.	.	.	.	0.000869565	.
4	21155038	TSD=AAAAAGAAAAATA;ASSESS=5;INTERNAL=KCNIP4,INTRONIC;SVTYPE=LINE1;SVLEN=6016;MEINFO=L1Ta1d,2,6018,-;DIFF=0.08:n1,c37a,t231c,t254a,c255t,c363t,n370-6019;LP=25;RP=27;RA=-0.111;ISTP=0;PRIOR=false;SR=6;AF=0.00030021;AC=2	.	.	.	0.00030021	.	.	.
4	21374975	TSD=TCATATTCATTTTT;ASSESS=5;INTERNAL=NM_147182,INTRONIC;SVTYPE=LINE1;SVLEN=6016;MEINFO=L1Ta1d,3,6019,-;DIFF=0.06:n1-2,t231c,t254a,n413-6019;LP=1;RP=16;RA=-4;ISTP=0;PRIOR=false;SR=12;GENE=KCNIP4;AF=0.000206016;AC=1	0.000206016	.	.	.	.	.	.
4	22108444	TSD=AAAAATTGGGAAACAT;ASSESS=5;INTERNAL=null,null;SVTYPE=LINE1;SVLEN=6010;MEINFO=L1Ta1d,9,6019,+;DIFF=0.08:n1-9,t231c,t254a,n396-6019;LP=25;RP=17;RA=0.556;ISTP=0;PRIOR=false;SR=18	0.000199681	0.000716332	.	0.00105074	.	0.00087108	.
4	24090616	TSD=AAGAAATGCTTCA;ASSESS=5;INTERNAL=PPARGC1A,INTRONIC;SVTYPE=LINE1;SVLEN=6019;MEINFO=L1Ta,0,6019,+;DIFF=0.1:n1-5602,t5808a,c5830a,c5836t;LP=8;RP=13;RA=-0.7;ISTP=0;PRIOR=false;SR=4;AF=0.000150105;AC=1	.	.	.	0.000150105	.	.	.
4	25216087	TSD=TAGTTTTGTATTTTT;ASSESS=5;INTERNAL=null,null;SVTYPE=LINE1;SVLEN=6017;MEINFO=L1Ta,2,6019,-;DIFF=0.1:n1-5603,n5615,n5618,n5623,n5628,n5631-5632,n5636,n5639,n5649-5650,n5656,n5658-5659,n5661,n5666,n5672-5677,n5681,n5684-5686,n5688-5689,c5690a,n5692-5693,n5700,n5703,n5705,n5707,c5709a,a5710c,n5713,n5715-5721,n5729,n5731-5733,n5737,n5739-5740;LP=46;RP=66;RA=-0.521;ISTP=0;PRIOR=false;SR=50;GENE=LOC1…	0.000798722	.	.	.	.	.	.
4	26189781	TSD=TATC;ASSESS=5;INTERNAL=RBPJ,PROMOTER;SVTYPE=LINE1;SVLEN=6005;MEINFO=L1Ta,14,6019,-;DIFF=0.07:n1-5682,c5838a,n5861,g5863a,c5866a,n5870,t5872a,t5877a,g5883a,n5893,t5896a,c5920a,t5933a,c6003t;LP=4;RP=9;RA=-1.17;ISTP=0;PRIOR=false;SR=6;AF=0.000150105;AC=1	.	.	.	0.000150105	.	.	.
4	26619387	TSD=TTTTTTTGTATTTTTA;ASSESS=5;INTERNAL=TBC1D19,INTRONIC;SVTYPE=LINE1;SVLEN=6018;MEINFO=L1Ta1d,1,6019,-;DIFF=0.05:t231c,t254a,c269t,n299-6019;LP=3;RP=8;RA=-1.415;ISTP=0;PRIOR=false;SR=15;AF=0.000150105;AC=1	.	.	.	0.000150105	.	.	.
4	26728593	TSD=AAAAAGAAATGTTTTTTGAG;ASSESS=5;INTERNAL=NM_018317,INTRONIC;SVTYPE=LINE1;SVLEN=6012;MEINFO=L1Ta1d,7,6019,+;DIFF=0.06:n1-4,t231c,t254a,c322a,n425-6019;LP=18;RP=3;RA=2.585;ISTP=0;PRIOR=false;SR=12;GENE=TBC1D19;AF=0.000199681;AC=1	0.000199681	.	.	.	.	.	.
4	27696675	TSD=TATTTCTT;ASSESS=5;INTERNAL=null,null;SVTYPE=LINE1;SVLEN=6017;MEINFO=L1Ta1d,2,6019,-;DIFF=0.09:n1-2,t231c,t254a,c327t,n438-6019;LP=9;RP=22;RA=-1.29;ISTP=0;PRIOR=false;SR=9	0.000798722	0.000716332	.	.	.	.	.
4	28064776	TSD=CCAAATACAGATTT;ASSESS=5;INTERNAL=null,null;SVTYPE=LINE1;SVLEN=6011;MEINFO=L1Ta1d,8,6019,-;DIFF=0.09:n1-6,n417-550,n552,n555,n561-562,n572-573,n576,n580,n583,n587,n601-602,n613,n620,n624,n629,n637,n640,n678,n684,n699,n701-6019;LP=17;RP=39;RA=-1.198;ISTP=0;PRIOR=false;SR=27	.	0.00143266	.	0.000450315	.	0.00173913	.
4	29039822	TSD=AGAGTACATAAGGAA;ASSESS=5;INTERNAL=MIR4275,TERMINATOR;SVTYPE=LINE1;SVLEN=6008;MEINFO=L1Ta1d,10,6018,+;DIFF=0.09:n1-9,t231c,t254a,n394-6019;LP=14;RP=16;RA=-0.193;ISTP=0;PRIOR=false;SR=8;AF=0.00030021;AC=2	.	.	.	0.00030021	.	.	.
4	29454378	TSD=AGAAAGACAAATTATG;ASSESS=5;INTERNAL=null,null;SVTYPE=LINE1;SVLEN=6019;MEINFO=L1Ambig,0,6019,+;DIFF=0.11:n1-111,c144g,t231c,t254a,n511,n537,n547,n561,n623-6019;LP=17;RP=11;RA=0.628;ISTP=0;PRIOR=false;SR=9	0.000199681	0.000716332	.	.	.	.	.
4	29893107	TSD=AAGAATGTATTTCAATC;ASSESS=5;INTERNAL=null,null;SVTYPE=LINE1;SVLEN=6007;MEINFO=L1Ta1d,12,6019,+;DIFF=0.12:n1-17,g105a,t254a,n540-6019;LP=259;RP=149;RA=0.798;ISTP=0;PRIOR=false;SR=187	0.00678914	0.0100287	.	0.0187631	0.015873	.	.
4	29903997	TSD=AAGAAAACTTAA;ASSESS=5;INTERNAL=null,null;SVTYPE=LINE1;SVLEN=6019;MEINFO=L1Ta,0,6019,+;DIFF=0.11:n1-5526,n5558,n5560,n5583,n5587,t5657g,n5721,n5734,a5736c,n5741,n5743;LP=18;RP=16;RA=0.17;ISTP=0;PRIOR=false;SR=8;AF=0.000199681;AC=1	0.000199681	.	.	.	.	.	.
4	32023899	TSD=GAACCAAGGTCCTTCT;ASSESS=5;INTERNAL=LOC102723828,INTRONIC;SVTYPE=LINE1;SVLEN=6018;MEINFO=L1Ta,1,6019,-;DIFF=0.11:n1-5640;LP=14;RP=10;RA=0.485;ISTP=0;PRIOR=false;SR=23;AF=0.00030021;AC=2	.	.	.	0.00030021	.	.	.
4	32273811	TSD=AAGAATGCCTTTA;ASSESS=5;INTERNAL=null,null;SVTYPE=LINE1;SVLEN=6019;MEINFO=L1Ta1d,0,6019,+;DIFF=0.14:g184c,g210c,t231c,t254a,n539,n576,n612-6019;LP=20;RP=10;RA=1;ISTP=0;PRIOR=false;SR=13;AF=0.000199681;AC=1	0.000199681	.	.	.	.	.	.
4	34036384	TSD=TAAAACATTATAAA;ASSESS=5;INTERNAL=NR_125902,INTRONIC;SVTYPE=LINE1;SVLEN=6018;MEINFO=L1Ta1d,1,6019,+;DIFF=0.12:n1,t231c,t254a,n469-6019;LP=17;RP=9;RA=0.918;ISTP=0;PRIOR=false;SR=7;GENE=LOC101928622;AF=0.000199681;AC=1	0.000199681	.	.	.	.	.	.
4	34037364	TSD=null;ASSESS=4;INTERNAL=LOC101928622,INTRONIC;SVTYPE=LINE1;SVLEN=6015;MEINFO=L1Ambig,3,6018,-;DIFF=0.08:n1-2,g38a,i72c,g83c,t153c,g219t,t231c,t254a,c305t,g313a,c322a,c325a,n345,c351g,g352a,n390,n441-6019;LP=14;RP=4;RA=1.807;ISTP=0;PRIOR=false;SR=4;AF=0.000150105;AC=1	.	.	.	0.000150105	.	.	.
4	35469852	TSD=AAAGAAACTATCAA;ASSESS=5;INTERNAL=ARAP2,TERMINATOR;SVTYPE=LINE1;SVLEN=6017;MEINFO=L1Ta1d,2,6019,+;DIFF=0.04:n1-2,n16,n18,n30,n38,n45,t231c,t254a,n300-6019;LP=7;RP=2;RA=1.807;ISTP=0;PRIOR=false;SR=7;AF=0.000150105;AC=1	.	.	.	0.000150105	.	.	.
4	36039737	TSD=TCCAAATACTCTT;ASSESS=5;INTERNAL=ARAP2,TERMINATOR;SVTYPE=LINE1;SVLEN=6018;MEINFO=L1Ta1d,1,6019,-;DIFF=0.09:t123g,t231c,t254a,g328a,n429-6019;LP=15;RP=45;RA=-1.585;ISTP=0;PRIOR=false;SR=36;AF=0.00030021;AC=2	.	.	.	0.00030021	.	.	.
4	36738995	TSD=AAAAACATCTATTTC;ASSESS=5;INTERNAL=null,null;SVTYPE=LINE1;SVLEN=6019;MEINFO=L1Ta1d,0,6019,+;DIFF=0.1:c60t,n335,n349-6019;LP=18;RP=4;RA=2.17;ISTP=0;PRIOR=false;SR=10	.	.	.	.	0.00793651	0.000869565	.
4	37254502	TSD=GGTCATGTTATTTA;ASSESS=5;INTERNAL=NWD2,INTRONIC;SVTYPE=LINE1;SVLEN=6018;MEINFO=L1Ta1d,1,6019,-;DIFF=0.09:g210c,t231c,t254a,n279-6019;LP=28;RP=27;RA=0.052;ISTP=0;PRIOR=false;SR=39;AF=0.00030021;AC=2	.	.	.	0.00030021	.	.	.
4	38412700	TSD=GATCAGCCTCCCTTCT;ASSESS=5;INTERNAL=NR_110951,TERMINATOR;SVTYPE=LINE1;SVLEN=6017;MEINFO=L1Ta,2,6019,-;DIFF=0.13:n1-5555,a5596t,n5872,n5945-5946;LP=10;RP=18;RA=-0.848;ISTP=0;PRIOR=false;SR=13	0.000199681	0.000716332	.	.	.	.	.
4	38474296	TSD=null;ASSESS=3;INTERNAL=NR_110951,INTRONIC;SVTYPE=LINE1;SVLEN=6014;MEINFO=L1Ta1d,4,6018,+;DIFF=0.1:n1-3,n479-6019;LP=15;RP=9;RA=0.737;ISTP=0;PRIOR=false;SR=3;GENE=LINC01258;AF=0.000199681;AC=1	0.000199681	.	.	.	.	.	.
4	38908867	TSD=GAAAACTGAGCTTCT;ASSESS=5;INTERNAL=FAM114A1,INTRONIC;SVTYPE=LINE1;SVLEN=6019;MEINFO=L1Ta1d,0,6019,-;DIFF=0.12:t231c,t254a,c327t,n437-6019;LP=13;RP=17;RA=-0.387;ISTP=0;PRIOR=false;SR=20;AF=0.000150105;AC=1	.	.	.	0.000150105	.	.	.
4	38990853	TSD=TTTTTTTTTTTTTTTTTTTTT;ASSESS=5;INTERNAL=NM_024943,INTRONIC;SVTYPE=LINE1;SVLEN=6019;MEINFO=L1Ta1d,0,6019,-;DIFF=0.09:g167a,t231c,t254a,c324a,n378-440,c529a,n591-6019;LP=7;RP=22;RA=-1.652;ISTP=0;PRIOR=false;SR=9	0.151558	0.119628	.	.	.	.	.
4	39066351	TSD=TACTTCCCTTGATTT;ASSESS=5;INTERNAL=NM_199039,INTRONIC;SVTYPE=LINE1;SVLEN=6019;MEINFO=L1Ambig,0,6019,-;DIFF=0.11:n1-787,n951-954,n984,g999a,n1161-1162,n1171,n1191,n1193,n1216-6019;LP=14;RP=34;RA=-1.28;ISTP=0;PRIOR=false;SR=23;GENE=KLHL5;AF=0.000399361;AC=2	0.000399361	.	.	.	.	.	.
4	41156743	TSD=AAGACTCATCATTTA;ASSESS=5;INTERNAL=NM_004307,INTRONIC;SVTYPE=LINE1;SVLEN=6016;MEINFO=L1Ta1d,3,6019,+;DIFF=0.15:n1-3,t231c,t254a,c327t,n608-6019;LP=16;RP=8;RA=1;ISTP=0;PRIOR=false;SR=14	0.000399361	0.000716332	.	.	.	.	.
4	41281154	TSD=GAATTAACCCATTTC;ASSESS=5;INTERNAL=null,null;SVTYPE=LINE1;SVLEN=6015;MEINFO=L1Ta1d,4,6019,-;DIFF=0.09:n1-3,t231c,t254a,a368t,n404-6019;LP=9;RP=21;RA=-1.222;ISTP=0;PRIOR=false;SR=13;AF=0.000199681;AC=1	0.000199681	.	.	.	.	.	.
4	41442328	TSD=AAAAATAAAAATAAA;ASSESS=5;INTERNAL=LIMCH1,INTRONIC;SVTYPE=LINE1;SVLEN=6017;MEINFO=L1Ta1d,1,6018,-;DIFF=0.09:t231c,t254a,c255t,n320-376,n379,a388c,n407-408,n410,n413-414,n422,n433,n436,n444-445,n449,n463,a471g,n474-475,n482,a486g,n493,n517,n528-6019;LP=54;RP=53;RA=0.027;ISTP=0;PRIOR=false;SR=54;AF=0.000750525;AC=5	.	.	.	0.000750525	.	.	.
4	41523668	TSD=CCATATTTTAATTTTAT;ASSESS=5;INTERNAL=NM_014988,INTRONIC;SVTYPE=LINE1;SVLEN=6017;MEINFO=L1Ta1d,2,6019,-;DIFF=0.1:n1-2,t231c,t254a,c327t,n441,n454,n518-6019;LP=8;RP=16;RA=-1;ISTP=0;PRIOR=false;SR=20;GENE=LIMCH1;AF=0.000199681;AC=1	0.000199681	.	.	.	.	.	.
4	41863205	TSD=TAGTTTTATTTTTT;ASSESS=5;INTERNAL=null,null;SVTYPE=LINE1;SVLEN=6019;MEINFO=L1Ta1d,0,6019,-;DIFF=0.12:c144g,t231c,t254a,g433a,n445,n447,n462-6019;LP=16;RP=48;RA=-1.585;ISTP=0;PRIOR=false;SR=24;AF=0.000399361;AC=2	0.000399361	.	.	.	.	.	.
4	42675177	TSD=GTCACTGTACCTTTTTTT;ASSESS=5;INTERNAL=ATP8A1,PROMOTER;SVTYPE=LINE1;SVLEN=6012;MEINFO=L1Ta1d,7,6019,-;DIFF=0.09:n1-7,t231c,t254a,c327t,n411-425,n430-431,n434-435,n437-438,n444-446,c447a,n448-448,n459,n462-463,n481,n512,n514,n539,n575-6019;LP=10;RP=24;RA=-1.263;ISTP=0;PRIOR=false;SR=13;AF=0.00030021;AC=2	.	.	.	0.00030021	.	.	.
4	42730089	TSD=AACACTTTGTTTTTTT;ASSESS=5;INTERNAL=null,null;SVTYPE=LINE1;SVLEN=6018;MEINFO=L1Ta1d,1,6019,-;DIFF=0.1:n1-2,t231c,t254a,a423g,n545-6019;LP=8;RP=21;RA=-1.392;ISTP=0;PRIOR=false;SR=11	0.00119808	0.000716332	.	.	.	.	.
4	43284122	TSD=CAGCCTTTA;ASSESS=5;INTERNAL=null,null;SVTYPE=LINE1;SVLEN=6007;MEINFO=L1Ta,12,6019,-;DIFF=0.12:n1-5574,t5962c;LP=82;RP=147;RA=-0.842;ISTP=0;PRIOR=false;SR=80	0.00239617	0.00573066	.	0.0127589	0.00793651	0.0026087	.
4	44328335	TSD=GACTTACTATATTTTT;ASSESS=5;INTERNAL=NM_198353,INTRONIC;SVTYPE=LINE1;SVLEN=6019;MEINFO=L1Ta,0,6019,-;DIFF=0.11:n1-5602,n5934,c5950a;LP=24;RP=21;RA=0.193;ISTP=0;PRIOR=false;SR=12	0.000399361	0.000716332	.	.	.	.	.
4	44924370	TSD=GAAAAGACATGGCTC;ASSESS=5;INTERNAL=GNPDA2,PROMOTER;SVTYPE=LINE1;SVLEN=6015;MEINFO=L1Ta1d,4,6019,+;DIFF=0.11:n1-4,t231c,t254a,n496-6019;LP=33;RP=13;RA=1.344;ISTP=0;PRIOR=false;SR=20;AF=0.000150105;AC=1	.	.	.	0.000150105	.	.	.
4	47150102	TSD=AGCAAATTATAATATT;ASSESS=5;INTERNAL=NM_000812,INTRONIC;SVTYPE=LINE1;SVLEN=6017;MEINFO=L1Ta1d,2,6019,-;DIFF=0.09:n1-2,t231c,t254a,g256a,n489-6019;LP=7;RP=15;RA=-1.1;ISTP=0;PRIOR=false;SR=10	0.000199681	0.000716332	.	.	.	.	.
4	47357148	TSD=TAAATATTTT;ASSESS=5;INTERNAL=NM_000812,INTRONIC;SVTYPE=LINE1;SVLEN=6019;MEINFO=L1Ta1d,0,6019,-;DIFF=0.09:t231c,t254a,n476-6019;LP=11;RP=20;RA=-0.862;ISTP=0;PRIOR=false;SR=9	0.000199681	0.000716332	.	.	.	.	.
4	47410103	TSD=TTAAATTTTG;ASSESS=5;INTERNAL=NM_000812,INTRONIC;SVTYPE=LINE1;SVLEN=6017;MEINFO=L1Ta1d,2,6019,-;DIFF=0.1:n1-2,t231c,t254a,n303-309,n315,c327t,n483,n491,n496-6019;LP=10;RP=14;RA=-0.485;ISTP=0;PRIOR=false;SR=17;GENE=GABRB1;AF=0.000199681;AC=1	0.000199681	.	.	.	.	.	.
4	47507605	TSD=AAAAGGAAATGGG;ASSESS=5;INTERNAL=NM_020453,INTRONIC;SVTYPE=LINE1;SVLEN=6019;MEINFO=L1Ta,0,6019,+;DIFF=0.13:n1-5599;LP=23;RP=22;RA=0.064;ISTP=0;PRIOR=false;SR=9;GENE=ATP10D;AF=0.000199681;AC=1	0.000199681	.	.	.	.	.	.
4	47642097	TSD=AAAAACATTTCTTCC;ASSESS=5;INTERNAL=NM_001278585,INTRONIC;SVTYPE=LINE1;SVLEN=6016;MEINFO=L1Ta1d,3,6019,+;DIFF=0.14:n1-3,c144g,t231c,t254a,n499-507,n575,n612,n658-6019;LP=13;RP=13;RA=0;ISTP=0;PRIOR=false;SR=11;GENE=CORIN;AF=0.000199681;AC=1	0.000199681	.	.	.	.	.	.
4	47786853	TSD=null;ASSESS=4;INTERNAL=CORIN,EXON_3;SVTYPE=LINE1;SVLEN=6019;MEINFO=L1Ta1d,0,6019,+;DIFF=0.04:n1-3,c115a,n121-236,t254a,c257t,n284,t299a,n313-6019;LP=8;RP=3;RA=1.415;ISTP=-1;PRIOR=false;SR=4	.	.	.	.	.	.	1.00735e-05
4	47791956	TSD=AAACTATGGTA;ASSESS=5;INTERNAL=NM_001278586,INTRONIC;SVTYPE=LINE1;SVLEN=6019;MEINFO=L1Ta1d,0,6019,+;DIFF=0.09:g167a,t231c,t254a,c324a,n466-6019;LP=42;RP=22;RA=0.933;ISTP=0;PRIOR=false;SR=35	0.000399361	0.00143266	.	0.00105074	.	0.000869565	.
4	48181287	TSD=ATAAAGACAATTCTG;ASSESS=5;INTERNAL=NM_003215,INTRONIC;SVTYPE=LINE1;SVLEN=6019;MEINFO=L1Ta1d,0,6019,+;DIFF=0.08:t231c,t254a,n448,n459,n468,n497-6019;LP=21;RP=4;RA=2.392;ISTP=0;PRIOR=false;SR=19;GENE=TEC;AF=0.000399361;AC=2	0.000399361	.	.	.	.	.	.
4	48628975	TSD=AAAACTATTTCTACTTT;ASSESS=5;INTERNAL=FRYL,INTRONIC;SVTYPE=LINE1;SVLEN=6019;MEINFO=L1Ta,0,6019,+;DIFF=0.09:n1-5704;LP=11;RP=20;RA=-0.862;ISTP=0;PRIOR=false;SR=17;AF=0.000150105;AC=1	.	.	.	0.000150105	.	.	.
4	48915373	TSD=AGAATTTTGTTGTAA;ASSESS=5;INTERNAL=OCIAD2,PROMOTER;SVTYPE=LINE1;SVLEN=6007;MEINFO=L1Ta1d,12,6019,+;DIFF=0.1:n1-12,t231c,t254a,c325g,n352-6019;LP=29;RP=21;RA=0.466;ISTP=0;PRIOR=false;SR=23;AF=0.00030021;AC=2	.	.	.	0.00030021	.	.	.
4	49083953	TSD=AAGATTAAACCTTTTTTTT;ASSESS=5;INTERNAL=null,null;SVTYPE=LINE1;SVLEN=6016;MEINFO=L1Ta1d,3,6019,+;DIFF=0.09:n1-3,n451-6019;LP=21;RP=10;RA=1.07;ISTP=0;PRIOR=false;SR=7;AF=0.000199681;AC=1	0.000199681	.	.	.	.	.	.
4	49244759	TSD=GAAAAAGTGATCAATG;ASSESS=5;INTERNAL=null,null;SVTYPE=LINE1;SVLEN=6019;MEINFO=L1Ambig,0,6019,+;DIFF=0.09:n1-3,i73g,c115a,g167a,t231c,t254a,c257t,g352a,n402-6019;LP=34;RP=14;RA=1.28;ISTP=0;PRIOR=false;SR=23;AF=0.000399361;AC=2	0.000399361	.	.	.	.	.	.
4	52026165	TSD=CAGTAATTCTT;ASSESS=5;INTERNAL=SGCB,INTRONIC;SVTYPE=LINE1;SVLEN=6019;MEINFO=L1Ta1d,0,6019,-;DIFF=0.1:t231c,t254a,n423-6019;LP=41;RP=52;RA=-0.343;ISTP=0;PRIOR=false;SR=41;AF=0.00090063;AC=6	.	.	.	0.00090063	.	.	.
4	52373933	TSD=AGAAAGATTGTTC;ASSESS=5;INTERNAL=USP46,TERMINATOR;SVTYPE=LINE1;SVLEN=6017;MEINFO=L1Ta,1,6018,+;DIFF=0.05:n1-5727,n5822;LP=6;RP=5;RA=0.263;ISTP=0;PRIOR=false;SR=9;AF=0.000150105;AC=1	.	.	.	0.000150105	.	.	.
4	52968163	TSD=TGCTCATTCCATTTCT;ASSESS=5;INTERNAL=NM_152540,INTRONIC;SVTYPE=LINE1;SVLEN=6018;MEINFO=L1Ta1d,1,6019,-;DIFF=0.05:a52t,t231c,t254a,n332-6019;LP=1;RP=36;RA=-5.17;ISTP=0;PRIOR=false;SR=33	.	.	.	0.000150105	0.015873	0.00173913	.
4	53125442	TSD=CATTCTTATTCTCTTTT;ASSESS=5;INTERNAL=NM_152540,INTRONIC;SVTYPE=LINE1;SVLEN=6017;MEINFO=L1Ta,2,6019,-;DIFF=0.11:n1-5618,n5623,n5627-5628,n5631,n5642,n5648,n5657-5658,n5660,n5665-5666,n5671,n5693,n5704,n5717,n5719,n5727,n5732,n5741,n5743,n5755,n5759,n5901;LP=12;RP=14;RA=-0.222;ISTP=0;PRIOR=false;SR=13;GENE=SCFD2;AF=0.000199681;AC=1	0.000199681	.	.	.	.	.	.
4	53194643	TSD=AGAAAATAACACAGAT;ASSESS=5;INTERNAL=NM_152540,INTRONIC;SVTYPE=LINE1;SVLEN=6016;MEINFO=L1Ta1d,3,6019,+;DIFF=0.13:n1-3,a140g,t231c,t254a,a388g,n553-6019;LP=22;RP=18;RA=0.29;ISTP=0;PRIOR=false;SR=16;GENE=SCFD2;AF=0.000199681;AC=1	0.000199681	.	.	.	.	.	.
4	53502136	TSD=TAATAATAATTATT;ASSESS=5;INTERNAL=NR_046622,INTRONIC;SVTYPE=LINE1;SVLEN=6019;MEINFO=L1Ta1d,0,6019,-;DIFF=0.12:n489-6019;LP=51;RP=88;RA=-0.787;ISTP=0;PRIOR=false;SR=64	0.00439297	0.00358166	.	.	.	.	.
4	53526868	TSD=AAAATCTTTGAATCTC;ASSESS=5;INTERNAL=LNX1,INTRONIC;SVTYPE=LINE1;SVLEN=6019;MEINFO=L1Ta1d,0,6019,+;DIFF=0.07:t231c,t254a,n255,n268-275,n293,n295,n304,g419a,n423-6019;LP=10;RP=18;RA=-0.848;ISTP=0;PRIOR=false;SR=16;AF=0.000150105;AC=1	.	.	.	0.000150105	.	.	.
4	53543489	TSD=AGTGTAAACTCTT;ASSESS=5;INTERNAL=LNX1,INTRONIC;SVTYPE=LINE1;SVLEN=6019;MEINFO=L1Ta1d,0,6019,-;DIFF=0.05:c280t,n350-6019;LP=1;RP=14;RA=-3.807;ISTP=0;PRIOR=false;SR=15;AF=0.000150105;AC=1	.	.	.	0.000150105	.	.	.
4	54313055	TSD=CTGTCATTTTAATTTTT;ASSESS=5;INTERNAL=null,null;SVTYPE=LINE1;SVLEN=6018;MEINFO=L1Ta1d,1,6019,-;DIFF=0.11:n471,n538-6019;LP=17;RP=23;RA=-0.436;ISTP=0;PRIOR=false;SR=22;AF=0.000199681;AC=1	0.000199681	.	.	.	.	.	.
4	55618689	TSD=null;ASSESS=4;INTERNAL=NR_120489,INTRONIC;SVTYPE=LINE1;SVLEN=6015;MEINFO=L1Ambig,3,6018,-;DIFF=0.04:n1-3,c51t,i73g,t149g,t153c,t231c,t254a,n305-365,n380,t387c,n391,n394-395,n400,n407,n411,a423g,n424,n442,c463a,n467,n475,n517-6019;LP=25;RP=10;RA=1.322;ISTP=0;PRIOR=false;SR=4	.	.	.	.	.	0.00521739	.
4	56078595	TSD=AAATTCTTTATTTTT;ASSESS=5;INTERNAL=CEP135,TERMINATOR;SVTYPE=LINE1;SVLEN=6019;MEINFO=L1Ambig,0,6019,-;DIFF=0.09:n1-3,i73g,c115a,c143t,g167a,t231c,t254a,c257t,n345-6019;LP=9;RP=15;RA=-0.737;ISTP=0;PRIOR=false;SR=10;AF=0.000150105;AC=1	.	.	.	0.000150105	.	.	.
4	56239989	TSD=GACAGGTTTTTTTT;ASSESS=5;INTERNAL=KIAA1211,INTRONIC;SVTYPE=LINE1;SVLEN=6019;MEINFO=L1Ta1d,0,6019,-;DIFF=0.11:t231c,t254a,n399-6019;LP=42;RP=45;RA=-0.1;ISTP=0;PRIOR=false;SR=44;AF=0.00060042;AC=4	.	.	.	0.00060042	.	.	.
4	56251896	TSD=GAAATGTGGCCATTTTTCTT;ASSESS=5;INTERNAL=NM_020722,INTRONIC;SVTYPE=LINE1;SVLEN=6018;MEINFO=L1Ta1d,1,6019,-;DIFF=0.1:n1-3,t231c,t254a,n451,n548-6019;LP=7;RP=17;RA=-1.28;ISTP=0;PRIOR=false;SR=15;GENE=KIAA1211;AF=0.000199681;AC=1	0.000199681	.	.	.	.	.	.
4	56320402	TSD=CAAAATACATTTTTA;ASSESS=5;INTERNAL=NM_020722,INTRONIC;SVTYPE=LINE1;SVLEN=6019;MEINFO=L1Ta1d,0,6019,-;DIFF=0.11:t337c,n463-6019;LP=28;RP=60;RA=-1.1;ISTP=0;PRIOR=false;SR=48;GENE=KIAA1211;AF=0.000599042;AC=3	0.000599042	.	.	.	.	.	.
4	56338155	TSD=AAAGTTAACC;ASSESS=5;INTERNAL=NM_001286668,TERMINATOR;SVTYPE=LINE1;SVLEN=6019;MEINFO=L1Ambig,0,6019,+;DIFF=0.09:n3,i73g,c115a,g167a,t231c,t254a,c257t,g352a,n373-374,n380,n383,n408,n411,n429,n450-451,n474,n494,n499-6019;LP=16;RP=8;RA=1;ISTP=0;PRIOR=false;SR=12;GENE=AASDH;AF=0.000199681;AC=1	0.000199681	.	.	.	.	.	.
4	57005598	TSD=TTTTTTTTTTTTTAAA;ASSESS=5;INTERNAL=POLR2B,INTRONIC;SVTYPE=LINE1;SVLEN=6001;MEINFO=L1Ambig,17,6018,+;DIFF=0.06:n1-3212,c3281a,n3289-3304,c3354t,t3365a,n3369-3465,t3485c,n3542-6019;LP=6;RP=9;RA=-0.585;ISTP=0;PRIOR=false;SR=2	.	.	.	.	.	.	0.000120882
4	57316561	TSD=AGAAGATACAAAAAGCTGG;ASSESS=5;INTERNAL=LOC101928851,PROMOTER;SVTYPE=LINE1;SVLEN=6014;MEINFO=L1Ta1d,5,6019,+;DIFF=0.09:n1-3,t231c,t254a,c324a,n336-6019;LP=66;RP=55;RA=0.263;ISTP=0;PRIOR=false;SR=77;AF=0.000750525;AC=5	.	.	.	0.000750525	.	.	.
4	59060839	TSD=GAAAAAAAGATGA;ASSESS=5;INTERNAL=null,null;SVTYPE=LINE1;SVLEN=6019;MEINFO=L1Ta1d,0,6019,+;DIFF=0.09:c144g,t231c,t254a,n343,n362,n373,n409,n456-6019;LP=69;RP=58;RA=0.251;ISTP=0;PRIOR=false;SR=63;AF=0.000798722;AC=4	0.000798722	.	.	.	.	.	.
4	59329347	TSD=AACACATGAGTTTCTT;ASSESS=5;INTERNAL=LOC105377247,TERMINATOR;SVTYPE=LINE1;SVLEN=6018;MEINFO=L1Ta,1,6019,-;DIFF=0.1:n1-5584,t5628c,c5945t,t5970a;LP=20;RP=22;RA=-0.138;ISTP=0;PRIOR=false;SR=25;AF=0.000150105;AC=1	.	.	.	0.000150105	.	.	.
4	61485886	TSD=TAAGAAGATATTTA;ASSESS=5;INTERNAL=null,null;SVTYPE=LINE1;SVLEN=6016;MEINFO=L1Ambig,3,6019,-;DIFF=0.08:n1-3,g38a,i72c,g83c,t153c,t231c,t254a,n293,g313a,g352a,n462-6019;LP=8;RP=12;RA=-0.585;ISTP=0;PRIOR=false;SR=10;GENE=ADGRL3;AF=0.000199681;AC=1	0.000199681	.	.	.	.	.	.
4	62430274	TSD=GTGGGATTTGAATTTTATTTTT;ASSESS=5;INTERNAL=null,null;SVTYPE=LINE1;SVLEN=6015;MEINFO=L1Ta1d,4,6019,-;DIFF=0.12:n1-3,c377t,n450-6019;LP=39;RP=58;RA=-0.573;ISTP=0;PRIOR=false;SR=51	0.00279553	0.00286533	.	0.00135095	.	0.00608696	.
4	63469667	TSD=AAGATGTCATTTCA;ASSESS=5;INTERNAL=TECRL,TERMINATOR;SVTYPE=LINE1;SVLEN=6012;MEINFO=L1Ta1d,7,6019,+;DIFF=0.08:n1-7,t231c,t254a,c327t,n347-349,n351,g356a,n381-6019;LP=45;RP=13;RA=1.791;ISTP=0;PRIOR=false;SR=25;AF=0.00060042;AC=4	.	.	.	0.00060042	.	.	.
4	64242118	TSD=GTAAGTTTTT;ASSESS=5;INTERNAL=null,null;SVTYPE=LINE1;SVLEN=6018;MEINFO=L1Ambig,1,6019,-;DIFF=0.1:n1-3,i73g,c115a,g167a,t231c,t254a,c257t,g352a,n359-417,g498a,g524a,n568-6019;LP=12;RP=15;RA=-0.322;ISTP=0;PRIOR=false;SR=13;AF=0.000199681;AC=1	0.000199681	.	.	.	.	.	.
4	65153101	TSD=ATAAATAAATAGTAG;ASSESS=5;INTERNAL=null,null;SVTYPE=LINE1;SVLEN=6019;MEINFO=L1Ta1d,0,6019,+;DIFF=0.13:c144g,t231c,t254a,n478-6019;LP=14;RP=9;RA=0.637;ISTP=0;PRIOR=false;SR=15;AF=0.000199681;AC=1	0.000199681	.	.	.	.	.	.
4	65656049	TSD=AAGAAAACAGCCAGG;ASSESS=5;INTERNAL=NM_001281767,INTRONIC;SVTYPE=LINE1;SVLEN=6018;MEINFO=L1Ta1d,1,6019,+;DIFF=0.11:t231c,t254a,c339a,n369,n387,n391-6019;LP=41;RP=23;RA=0.834;ISTP=0;PRIOR=false;SR=35	0.00319489	0.002149	.	.	.	.	.
4	67091113	TSD=AAATGTATAAACTC;ASSESS=5;INTERNAL=LOC101927237,TERMINATOR;SVTYPE=LINE1;SVLEN=6018;MEINFO=L1Ambig,1,6019,+;DIFF=0.05:n1-3,i73g,c115a,c143t,g167a,t231c,t254a,c257t,n324,n352-6019;LP=12;RP=1;RA=3.585;ISTP=0;PRIOR=false;SR=4;AF=0.000150105;AC=1	.	.	.	0.000150105	.	.	.
4	68458730	TSD=AAGAAATAGGATCAATTAT;ASSESS=5;INTERNAL=TMPRSS11E,INTRONIC;SVTYPE=LINE1;SVLEN=6019;MEINFO=L1Ta1d,0,6019,+;DIFF=0.07:n1-2,g67t,t231c,t254a,g318a,g328a,a373g,n428-6019;LP=15;RP=1;RA=3.907;ISTP=0;PRIOR=false;SR=14;AF=0.000150105;AC=1	.	.	.	0.000150105	.	.	.
4	68787555	TSD=null;ASSESS=3;INTERNAL=null,null;SVTYPE=LINE1;SVLEN=6019;MEINFO=L1Ta1d,0,6019,-;DIFF=0.06:n1-2,t231c,t254a,g328a,n385-6019;LP=1;RP=36;RA=-5.17;ISTP=-1;PRIOR=false;SR=18	.	.	.	.	0.00793651	0.00173913	.
4	68908068	TSD=AAAGAATTTGCTCCAT;ASSESS=5;INTERNAL=null,null;SVTYPE=LINE1;SVLEN=6012;MEINFO=L1Ta1d,7,6019,+;DIFF=0.1:n1-7,c37t,g61a,t231c,t254a,n457-6019;LP=16;RP=11;RA=0.541;ISTP=0;PRIOR=false;SR=8;AF=0.000199681;AC=1	0.000199681	.	.	.	.	.	.
4	70340703	TSD=null;ASSESS=4;INTERNAL=NM_033122,TERMINATOR;SVTYPE=LINE1;SVLEN=6019;MEINFO=L1Ta1d,0,6019,+;DIFF=0.1:n1-5,t231c,t254a,n405,n515-6019;LP=23;RP=21;RA=0.131;ISTP=-1;PRIOR=false;SR=16;AF=0.00179712;AC=9	0.00179712	.	.	0.00660462	.	.	.
4	70340742	TSD=null;ASSESS=3;INTERNAL=NM_033122,TERMINATOR;SVTYPE=LINE1;SVLEN=6017;MEINFO=L1Ta1d,1,6018,-;DIFF=0.09:t231c,t254a,n341-410,n424,n450,n473,n492,c515t,n561-6019;LP=20;RP=8;RA=1.322;ISTP=-1;PRIOR=false;SR=8	.	0.156877	.	.	.	.	.
4	73304184	TSD=AAAAAGTTATATG;ASSESS=5;INTERNAL=null,null;SVTYPE=LINE1;SVLEN=6016;MEINFO=L1Ta1d,3,6019,+;DIFF=0.06:n1-2,t231c,t254a,n525-6019;LP=19;RP=2;RA=3.248;ISTP=0;PRIOR=false;SR=17;GENE=LOC102724832;AF=0.000199681;AC=1	0.000199681	.	.	.	.	.	.
4	75091275	TSD=AAAGAAATTAATTCC;ASSESS=5;INTERNAL=null,null;SVTYPE=LINE1;SVLEN=6019;MEINFO=L1Ta1d,0,6019,+;DIFF=0.12:c144g,t231c,t254a,n554-6019;LP=22;RP=9;RA=1.29;ISTP=0;PRIOR=false;SR=11;GENE=LOC105377283;AF=0.000199681;AC=1	0.000199681	.	.	0.000150105	.	.	.
4	76669666	TSD=AAATAAACTTTTT;ASSESS=5;INTERNAL=NM_020859,INTRONIC;SVTYPE=LINE1;SVLEN=6007;MEINFO=L1Ta1d,12,6019,+;DIFF=0.12:n1-12,t231c,t254a,n480-6019;LP=18;RP=9;RA=1;ISTP=0;PRIOR=false;SR=13;GENE=SHROOM3;AF=0.000199681;AC=1	0.000199681	.	.	.	.	.	.
4	77226132	TSD=AAGAAACACAAAGCA;ASSESS=5;INTERNAL=CCNG2,TERMINATOR;SVTYPE=LINE1;SVLEN=6017;MEINFO=L1Ta,2,6019,+;DIFF=0.08:n1-5664,n5709,n5730,g5739a,n5751,n5765,n5770;LP=20;RP=21;RA=-0.07;ISTP=0;PRIOR=false;SR=18;AF=0.000150105;AC=1	.	.	.	0.000150105	.	.	.
4	77576733	TSD=GAAACAGAGTTCCA;ASSESS=5;INTERNAL=NM_006419,INTRONIC;SVTYPE=LINE1;SVLEN=6010;MEINFO=L1Ta1d,8,6018,+;DIFF=0.11:n1-7,t231c,t254a,c327t,n453-6019;LP=100;RP=69;RA=0.535;ISTP=0;PRIOR=false;SR=45;GENE=CXCL13;AF=0.00119808;AC=6	0.00119808	.	.	.	.	.	.
4	77607980	TSD=TGAAAATTGTT;ASSESS=5;INTERNAL=CXCL13,INTRONIC;SVTYPE=LINE1;SVLEN=6018;MEINFO=L1Ta1d,1,6019,-;DIFF=0.1:g53a,t231c,t254a,c324a,n391-6019;LP=7;RP=13;RA=-0.893;ISTP=0;PRIOR=false;SR=13;AF=0.000150105;AC=1	.	.	.	0.000150105	.	.	.
4	78021666	TSD=AAGATAAAGTAG;ASSESS=5;INTERNAL=null,null;SVTYPE=LINE1;SVLEN=6018;MEINFO=L1Ta1d,1,6019,+;DIFF=0.09:n379-6019;LP=22;RP=12;RA=0.874;ISTP=0;PRIOR=false;SR=16;AF=0.000199681;AC=1	0.000199681	.	.	.	.	.	.
4	78039575	TSD=CCACAAGTTTCTTT;ASSESS=5;INTERNAL=null,null;SVTYPE=LINE1;SVLEN=6016;MEINFO=L1Ta1d,3,6019,-;DIFF=0.11:n1-3,c21t,t149g,t153c,t231c,t254a,g352a,n516-6019;LP=7;RP=21;RA=-1.585;ISTP=0;PRIOR=false;SR=21;AF=0.000199681;AC=1	0.000199681	.	.	.	.	.	.
4	78156714	TSD=CTGAATTGAATGATTCT;ASSESS=5;INTERNAL=FRAS1,INTRONIC;SVTYPE=LINE1;SVLEN=6016;MEINFO=L1Ta1d,3,6019,-;DIFF=0.06:n1,c166t,n386-6019;LP=7;RP=34;RA=-2.28;ISTP=0;PRIOR=false;SR=22;AF=0.00030021;AC=2	.	.	.	0.00030021	.	.	.
4	78654168	TSD=TTTATATTTCATTTT;ASSESS=5;INTERNAL=LINC01094,INTRONIC;SVTYPE=LINE1;SVLEN=6018;MEINFO=L1Ta1d,1,6019,-;DIFF=0.1:c63g,g210c,t231c,t254a,a388g,n465-6019;LP=8;RP=12;RA=-0.585;ISTP=0;PRIOR=false;SR=9;AF=0.000150105;AC=1	.	.	.	0.000150105	.	.	.
4	79085883	TSD=TACAGTTCTTT;ASSESS=5;INTERNAL=NR_038342,INTRONIC;SVTYPE=LINE1;SVLEN=6019;MEINFO=L1Ta1d,0,6019,-;DIFF=0.12:n1-2,t231c,t254a,n453-6019;LP=9;RP=12;RA=-0.415;ISTP=0;PRIOR=false;SR=6;GENE=LINC01088;AF=0.000199681;AC=1	0.000199681	.	.	.	.	.	.
4	79393139	TSD=AAGAGAGTGATAACCT;ASSESS=5;INTERNAL=GK2,TERMINATOR;SVTYPE=LINE1;SVLEN=6019;MEINFO=L1Ta1d,0,6019,+;DIFF=0.1:n1-2,n230-232,n236,t254a,n416-6019;LP=15;RP=11;RA=0.447;ISTP=0;PRIOR=false;SR=12;AF=0.000150105;AC=1	.	.	.	0.000150105	.	.	.
4	79831811	TSD=AAGAAATGGCATATA;ASSESS=5;INTERNAL=NR_026555,INTRONIC;SVTYPE=LINE1;SVLEN=6018;MEINFO=L1Ta1d,1,6019,+;DIFF=0.06:n1,t231c,t254a,n410-6019;LP=15;RP=1;RA=3.907;ISTP=0;PRIOR=false;SR=7;GENE=PCAT4;AF=0.000199681;AC=1	0.000199681	.	.	.	.	.	.
4	80449260	TSD=GAAATATTATATATGT;ASSESS=5;INTERNAL=NM_001206997,INTRONIC;SVTYPE=LINE1;SVLEN=6019;MEINFO=L1Ta1d,0,6019,+;DIFF=0.13:c144g,t231c,t254a,n573,n597-6019;LP=47;RP=33;RA=0.51;ISTP=0;PRIOR=false;SR=51	0.000599042	0.002149	.	.	0.015873	0.00521739	.
4	81285422	TSD=CTGTTTTGTT;ASSESS=5;INTERNAL=null,null;SVTYPE=LINE1;SVLEN=6012;MEINFO=L1Ta1d,7,6019,-;DIFF=0.13:n1-7,c37t,g61a,t231c,t254a,g270a,g364c,g483a,n520-6019;LP=14;RP=17;RA=-0.28;ISTP=0;PRIOR=false;SR=7	0.000798722	0.000716332	.	0.00135095	.	.	.
4	82000743	TSD=CAAAAACTATTTATG;ASSESS=5;INTERNAL=null,null;SVTYPE=LINE1;SVLEN=6019;MEINFO=L1Ta1d,0,6019,+;DIFF=0.11:c144g,c197t,t231c,t254a,g364c,n400-6019;LP=834;RP=564;RA=0.564;ISTP=0;PRIOR=false;SR=687	0.0261581	0.0365329	.	0.0875113	.	0.00956522	.
4	82128527	TSD=AAGAATGATGCTAAATC;ASSESS=5;INTERNAL=null,null;SVTYPE=LINE1;SVLEN=6019;MEINFO=L1Ta,0,6019,+;DIFF=0.09:n1-5521,n5524,n5526,n5544-5545,n5556,n5560,n5570,n5572-5573,n5587,n5594,n5603-5604,n5608,n5618,n5620,n5633,n5636-5638,n5642-5643,n5645,n5651,a5654t,n5656,n5661,n5663,n5666,t5668g,n5670,n5672-5721,n5725,n5727,n5731-5732,n5734-5736,n5742;LP=9;RP=16;RA=-0.83;ISTP=0;PRIOR=false;SR=15;AF=0.00019968…	0.000199681	.	.	.	.	.	.
4	82263586	TSD=AACAAACGTGTTTT;ASSESS=5;INTERNAL=null,null;SVTYPE=LINE1;SVLEN=6018;MEINFO=L1Ta,1,6019,+;DIFF=0.09:n1-5643,t5649a,c5662t,c5664t,g5676t,n5700-5701,n5703-5704,n5706-5707,n5714,n5729;LP=11;RP=11;RA=0;ISTP=0;PRIOR=false;SR=11	0.000399361	.	.	0.000150105	.	0.00434783	.
4	83678871	TSD=GCCTAATTACATTCTT;ASSESS=5;INTERNAL=null,null;SVTYPE=LINE1;SVLEN=6017;MEINFO=L1Ta1d,2,6019,-;DIFF=0.13:n1,t231c,t254a,n461-6019;LP=9;RP=19;RA=-1.078;ISTP=0;PRIOR=false;SR=16	.	0.000716332	.	.	.	.	.
4	83747444	TSD=AAAAATGAAATCTT;ASSESS=5;INTERNAL=GPAT3,TERMINATOR;SVTYPE=LINE1;SVLEN=6017;MEINFO=L1Ta1d,2,6019,+;DIFF=0.09:n1-2,t231c,t254a,n374-6019;LP=34;RP=12;RA=1.503;ISTP=0;PRIOR=false;SR=25;AF=0.00030021;AC=2	.	.	.	0.00030021	.	.	.
4	84087706	TSD=AGAAGCAAAGTCGA;ASSESS=5;INTERNAL=NR_125909,INTRONIC;SVTYPE=LINE1;SVLEN=6019;MEINFO=L1Ambig,0,6019,+;DIFF=0.1:n1-3,i73g,c115a,c143t,g167a,t231c,t254a,c257t,g352a,g446a,n489-6019;LP=108;RP=45;RA=1.263;ISTP=0;PRIOR=false;SR=69	0.00119808	0.00358166	.	0.00120084	.	.	.
4	84104991	TSD=AAACCTAATGTAGGG;ASSESS=5;INTERNAL=LOC101928978,INTRONIC;SVTYPE=LINE1;SVLEN=6014;MEINFO=L1Ta1d,5,6019,+;DIFF=0.09:n1-2,t231c,n254-6019;LP=11;RP=20;RA=-0.862;ISTP=0;PRIOR=false;SR=8;AF=0.000150105;AC=1	.	.	.	0.000150105	.	.	.
4	84328800	TSD=null;ASSESS=3;INTERNAL=null,null;SVTYPE=LINE1;SVLEN=6014;MEINFO=L1Ambig,4,6018,+;DIFF=0.04:n1-3,g38a,i72c,g83c,t153c,t231c,t254a,n269-6019;LP=14;RP=1;RA=3.807;ISTP=0;PRIOR=false;SR=1	.	.	.	.	0.00793651	.	.
4	85157319	TSD=AAGAAGATAGTATGGATTGA;ASSESS=5;INTERNAL=null,null;SVTYPE=LINE1;SVLEN=6019;MEINFO=L1Ta1d,0,6019,+;DIFF=0.11:t231c,t254a,n507-6019;LP=14;RP=13;RA=0.107;ISTP=0;PRIOR=false;SR=12;AF=0.000199681;AC=1	0.000199681	.	.	.	.	.	.
4	85463022	TSD=GAGTCATTTGT;ASSESS=5;INTERNAL=ARHGAP24,PROMOTER;SVTYPE=LINE1;SVLEN=6014;MEINFO=L1Ta1d,5,6019,-;DIFF=0.08:n1-4,t231c,t254a,c283t,n295-324,g352a,n476-6019;LP=9;RP=18;RA=-1;ISTP=0;PRIOR=false;SR=15;AF=0.000150105;AC=1	.	.	.	0.000150105	.	.	.
4	86741427	TSD=TAAAACCATCAGATCTT;ASSESS=5;INTERNAL=NM_006264,INTRONIC;SVTYPE=LINE1;SVLEN=6018;MEINFO=L1Ta,1,6019,+;DIFF=0.1:n1-5483,n5566,n5580,n5589,n5592,n5604,n5606,n5608,n5614,n5628,n5634-5663,n5693,n5720,g5883a,c6003t;LP=18;RP=12;RA=0.585;ISTP=0;PRIOR=false;SR=12;GENE=PTPN13;AF=0.000199681;AC=1	0.000199681	.	.	0.00120084	.	.	.
4	86757199	TSD=AAAAAACCTAG;ASSESS=5;INTERNAL=NM_006264,INTRONIC;SVTYPE=LINE1;SVLEN=6019;MEINFO=L1Ta1d,0,6019,+;DIFF=0.12:c144g,t231c,t254a,n514-6019;LP=21;RP=11;RA=0.933;ISTP=0;PRIOR=false;SR=17;GENE=PTPN13;AF=0.000199681;AC=1	0.000199681	.	.	.	.	.	.
4	87839562	TSD=AAGAAGTACTACC;ASSESS=5;INTERNAL=MEPE,INTRONIC;SVTYPE=LINE1;SVLEN=6018;MEINFO=L1Ta,1,6019,+;DIFF=0.1:n1-5402,a5442c,c5464t,t5486c,n5508-5509,t5535g,g5538c,n5554-5674,n5685,a5725g,c5855a,n5862,n5865,t5867a,n5874-5876,g5885a,g5894a,t5902a,c5945t;LP=11;RP=9;RA=0.29;ISTP=0;PRIOR=false;SR=4;AF=0.000150105;AC=1	.	.	.	0.000150105	.	.	.
4	87969171	TSD=TGAATATCTCTCCTTTTA;ASSESS=5;INTERNAL=NM_001251829,PROMOTER;SVTYPE=LINE1;SVLEN=6018;MEINFO=L1Ta1d,1,6019,-;DIFF=0.1:g167a,t231c,t254a,c324a,c529a,n556-6019;LP=5;RP=27;RA=-2.433;ISTP=0;PRIOR=false;SR=13	0.000199681	0.000716332	.	.	.	.	.
4	88358805	TSD=CCAGTCTCAGGTATTTCTTT;ASSESS=5;INTERNAL=null,null;SVTYPE=LINE1;SVLEN=6004;MEINFO=L1Ta1d,15,6019,-;DIFF=0.11:n1-14,t231c,t254a,a423g,n522-6019;LP=11;RP=39;RA=-1.826;ISTP=0;PRIOR=false;SR=25;AF=0.000399361;AC=2	0.000399361	.	.	.	.	.	.
4	88406752	TSD=TGTTTTTTT;ASSESS=5;INTERNAL=NM_001165136,INTRONIC;SVTYPE=LINE1;SVLEN=6018;MEINFO=L1Ta1d,1,6019,-;DIFF=0.1:n1,t231c,t254a,a423g,n473-6019;LP=14;RP=21;RA=-0.585;ISTP=0;PRIOR=false;SR=18;GENE=HERC6;AF=0.000199681;AC=1	0.000199681	.	.	.	.	.	.
4	88710638	TSD=AGAATTACCATTATCC;ASSESS=5;INTERNAL=NR_002806,INTRONIC;SVTYPE=LINE1;SVLEN=6018;MEINFO=L1Ta1d,1,6019,+;DIFF=0.11:n1,t231c,t254a,n416-6019;LP=24;RP=10;RA=1.263;ISTP=0;PRIOR=false;SR=10;GENE=FAM13A-AS1;AF=0.000199681;AC=1	0.000199681	.	.	.	.	.	.
4	88722884	TSD=TAAAAGATTATA;ASSESS=5;INTERNAL=FAM13A-AS1,INTRONIC;SVTYPE=LINE1;SVLEN=6019;MEINFO=L1Ta1d,0,6019,+;DIFF=0.09:n1-2,t231c,t254a,c327t,a329c,n428,n434,n493-6019;LP=18;RP=25;RA=-0.474;ISTP=0;PRIOR=false;SR=28;AF=0.00030021;AC=2	.	.	.	0.00030021	.	.	.
4	89785648	TSD=AAATAACATGAATAAG;ASSESS=5;INTERNAL=NM_001146055,INTRONIC;SVTYPE=LINE1;SVLEN=6019;MEINFO=L1Ta1d,0,6019,+;DIFF=0.1:t231c,n392-434,t539a,n585-617,n623,n670,n701,n768-6019;LP=56;RP=31;RA=0.853;ISTP=0;PRIOR=false;SR=53	0.00179712	0.002149	.	0.00510357	.	.	.
4	90688295	TSD=AATTTCTGAATCTT;ASSESS=5;INTERNAL=NM_207491,INTRONIC;SVTYPE=LINE1;SVLEN=6016;MEINFO=L1Ambig,3,6019,-;DIFF=0.09:n1-2,i73g,c115a,g167a,t231c,t254a,c257t,g352a,n436-6019;LP=11;RP=17;RA=-0.628;ISTP=0;PRIOR=false;SR=7;GENE=CCSER1;AF=0.000199681;AC=1	0.000199681	.	.	.	.	.	.
4	90758490	TSD=ATAGGTGATCATTTCTTT;ASSESS=5;INTERNAL=CCSER1,INTRONIC;SVTYPE=LINE1;SVLEN=6018;MEINFO=L1Ta1d,1,6019,-;DIFF=0.11:t231c,t254a,n360,n367,n375,n386,n390,n402-6019;LP=17;RP=22;RA=-0.372;ISTP=0;PRIOR=false;SR=20;AF=0.000150105;AC=1	.	.	.	0.000150105	.	.	.
4	91247884	TSD=AAAAAAAACAACAACAG;ASSESS=5;INTERNAL=CCSER1,INTRONIC;SVTYPE=LINE1;SVLEN=6019;MEINFO=L1Ta1d,0,6019,+;DIFF=0.07:g210c,t231c,t254a,n353-6019;LP=24;RP=7;RA=1.778;ISTP=0;PRIOR=false;SR=24;AF=0.00030021;AC=2	.	.	.	0.00030021	.	.	.
4	93469979	TSD=AAAAAGTGAAAATTAA;ASSESS=5;INTERNAL=GRID2,INTRONIC;SVTYPE=LINE1;SVLEN=6019;MEINFO=L1Ta1d,0,6019,+;DIFF=0.09:g167a,t231c,t254a,c324a,n436-6019;LP=17;RP=12;RA=0.503;ISTP=0;PRIOR=false;SR=23;AF=0.00030021;AC=2	.	.	.	0.00030021	.	.	.
4	94341627	TSD=AAGAATTCAAACAT;ASSESS=5;INTERNAL=NM_014485,INTRONIC;SVTYPE=LINE1;SVLEN=6017;MEINFO=L1Ta1d,2,6019,+;DIFF=0.12:n1-2,t231c,t254a,n405-6019;LP=20;RP=19;RA=0.074;ISTP=0;PRIOR=false;SR=14;GENE=HPGDS;AF=0.000199681;AC=1	0.000199681	.	.	.	.	.	.
4	94373884	TSD=AAAAAATGCAATCA;ASSESS=5;INTERNAL=null,null;SVTYPE=LINE1;SVLEN=6018;MEINFO=L1Ta1d,1,6019,+;DIFF=0.11:n1,t231c,t254a,n502-6019;LP=21;RP=15;RA=0.485;ISTP=0;PRIOR=false;SR=18;AF=0.000199681;AC=1	0.000199681	.	.	.	.	.	.
4	94622284	TSD=GCGTTCCTGTTTA;ASSESS=5;INTERNAL=NM_001256425,INTRONIC;SVTYPE=LINE1;SVLEN=6016;MEINFO=L1Ambig,3,6019,-;DIFF=0.09:n1-3,g38a,i72c,g83c,t153c,g219t,t231c,t254a,c305t,g313a,g321a,c351g,g352a,n514-6019;LP=59;RP=178;RA=-1.593;ISTP=0;PRIOR=false;SR=134	0.00519169	0.00573066	.	0.0229661	.	0.00173913	.
4	95020109	TSD=TAAAATGAAAACCC;ASSESS=5;INTERNAL=NM_001256792,INTRONIC;SVTYPE=LINE1;SVLEN=6019;MEINFO=L1Ta1d,0,6019,+;DIFF=0.1:n1-3,c115a,g167a,t231c,t254a,c257t,n346,g352a,n623-6019;LP=21;RP=7;RA=1.585;ISTP=0;PRIOR=false;SR=14	0.000199681	0.000716332	.	.	.	.	.
4	96404833	TSD=GCAAAGTCTGTTCTTT;ASSESS=5;INTERNAL=PDHA2,TERMINATOR;SVTYPE=LINE1;SVLEN=6015;MEINFO=L1Ta1d,4,6019,-;DIFF=0.06:n1-3,t231c,t254a,n447-6019;LP=4;RP=42;RA=-3.392;ISTP=0;PRIOR=false;SR=27;AF=0.000450315;AC=3	.	.	.	0.000450315	.	.	.
4	96641287	TSD=ACCAACCCTTTTA;ASSESS=5;INTERNAL=STPG2-AS1,PROMOTER;SVTYPE=LINE1;SVLEN=6019;MEINFO=L1Ta1d,0,6019,-;DIFF=0.07:t231c,n250,t254a,n256,c257a,c359a,n471-6019;LP=3;RP=14;RA=-2.222;ISTP=0;PRIOR=false;SR=20;AF=0.000150105;AC=1	.	.	.	0.000150105	.	.	.
4	96991992	TSD=ATAAATAATATTTCAG;ASSESS=5;INTERNAL=STPG2-AS1,PROMOTER;SVTYPE=LINE1;SVLEN=6013;MEINFO=L1Ta1d,6,6019,+;DIFF=0.05:n1-6,t231c,t254a,n353-6019;LP=14;RP=1;RA=3.807;ISTP=0;PRIOR=false;SR=7;AF=0.000150105;AC=1	.	.	.	0.000150105	.	.	.
4	97172441	TSD=AAGAAATAAATACATC;ASSESS=5;INTERNAL=null,null;SVTYPE=LINE1;SVLEN=6019;MEINFO=L1Ta1d,0,6019,+;DIFF=0.09:g184c,g210c,t231c,t254a,n411,n491-6019;LP=14;RP=13;RA=0.107;ISTP=0;PRIOR=false;SR=13;AF=0.000199681;AC=1	0.000199681	.	.	.	.	.	.
4	97182668	TSD=CCGGACACACAATCTTT;ASSESS=5;INTERNAL=null,null;SVTYPE=LINE1;SVLEN=6015;MEINFO=L1Ambig,4,6019,-;DIFF=0.11:n1-619,c649g,d674-676,n678,n740,c834a,g999a,n1057,n1076,n1087,n1089,n1129,n1137-6019;LP=669;RP=1089;RA=-0.703;ISTP=0;PRIOR=false;SR=767	0.0333466	0.0472779	.	0.127739	0.0238095	0.0113043	.
4	98315619	TSD=AAGAAACTGAAAAGC;ASSESS=5;INTERNAL=NM_021159,INTRONIC;SVTYPE=LINE1;SVLEN=6019;MEINFO=L1Ta1d,0,6019,+;DIFF=0.13:t231c,t254a,n474-6019;LP=20;RP=9;RA=1.152;ISTP=0;PRIOR=false;SR=13;GENE=RAP1GDS1;AF=0.000199681;AC=1	0.000199681	.	.	0.00105074	.	.	.
4	99264748	TSD=AAGAAAAGACACAGTTT;ASSESS=5;INTERNAL=NR_037884,INTRONIC;SVTYPE=LINE1;SVLEN=6010;MEINFO=L1Ta,8,6018,-;DIFF=0.1:n1-5685,c5899t;LP=22;RP=14;RA=0.652;ISTP=0;PRIOR=false;SR=9;GENE=LOC100507053;AF=0.000199681;AC=1	0.000199681	.	.	.	.	.	.
4	99549439	TSD=AAAATACATTGCCTTTG;ASSESS=5;INTERNAL=NM_001134665,INTRONIC;SVTYPE=LINE1;SVLEN=6009;MEINFO=L1Ta1d,10,6019,+;DIFF=0.12:n1-9,t231c,t254a,n592-6019;LP=17;RP=6;RA=1.503;ISTP=0;PRIOR=false;SR=14;GENE=TRMT10A;AF=0.000199681;AC=1	0.000199681	.	.	.	.	.	.
4	103410885	TSD=AAAACACCATCCAC;ASSESS=5;INTERNAL=LOC101929448,PROMOTER;SVTYPE=LINE1;SVLEN=6017;MEINFO=L1Ta1d,2,6019,+;DIFF=0.11:n1-2,t231c,t254a,g364a,n482-6019;LP=20;RP=28;RA=-0.485;ISTP=0;PRIOR=false;SR=34;AF=0.00030021;AC=2	.	.	.	0.00030021	.	.	.
4	103676242	TSD=AACATTTGTACAGATAGA;ASSESS=5;INTERNAL=NM_001059,INTRONIC;SVTYPE=LINE1;SVLEN=6017;MEINFO=L1Ta1d,2,6019,+;DIFF=0.05:n1-2,n99,t231c,t254a,c327t,n433-551,n565,n581,n586,n596,n615,c649g,c651g,n675-678,n684,n696,n706-6019;LP=13;RP=1;RA=3.7;ISTP=0;PRIOR=false;SR=14;GENE=TACR3;AF=0.000199681;AC=1	0.000199681	.	.	.	.	.	.
4	103975149	TSD=CAGGTGCTACTTTGT;ASSESS=5;INTERNAL=TACR3,PROMOTER;SVTYPE=LINE1;SVLEN=6019;MEINFO=L1Ta1d,0,6019,-;DIFF=0.08:n1-2,t231c,t254a,c327t,n349-6019;LP=13;RP=32;RA=-1.3;ISTP=0;PRIOR=false;SR=21;AF=0.00030021;AC=2	.	.	.	0.00030021	.	.	.
4	105929546	TSD=AAAAAACTCCACTTG;ASSESS=5;INTERNAL=NM_001033047,INTRONIC;SVTYPE=LINE1;SVLEN=6019;MEINFO=L1Ta1d,0,6019,+;DIFF=0.08:n1-2,t231c,t254a,c327t,n454-6019;LP=19;RP=5;RA=1.926;ISTP=0;PRIOR=false;SR=9	0.000199681	0.000716332	.	.	.	.	.
4	106095252	TSD=AAAAAAACAGCCTT;ASSESS=5;INTERNAL=TBCK,INTRONIC;SVTYPE=LINE1;SVLEN=6017;MEINFO=L1Ta1d,2,6019,+;DIFF=0.05:n1-2,g182t,t231c,t254a,n355-6019;LP=14;RP=1;RA=3.807;ISTP=0;PRIOR=false;SR=6;AF=0.000150105;AC=1	.	.	.	0.000150105	.	.	.
4	106173862	TSD=GGCACTACTGTTTTTT;ASSESS=5;INTERNAL=NM_001163436,INTRONIC;SVTYPE=LINE1;SVLEN=6019;MEINFO=L1Ta1d,0,6019,-;DIFF=0.12:t40c,c44g,t231c,t254a,n474-6019;LP=372;RP=493;RA=-0.406;ISTP=0;PRIOR=false;SR=232	0.0147764	0.0200573	.	0.0466827	.	0.00347826	.
4	106678348	TSD=null;ASSESS=3;INTERNAL=null,null;SVTYPE=LINE1;SVLEN=6018;MEINFO=L1Ta1d,1,6019,-;DIFF=0.06:t231c,t254a,n423-6019;LP=1;RP=19;RA=-4.248;ISTP=-1;PRIOR=false;SR=5;GENE=LOC105377356;AF=0.000199681;AC=1	0.000199681	.	.	.	.	.	.
4	106678361	TSD=CAGATAGGTTCTT;ASSESS=5;INTERNAL=null,null;SVTYPE=LINE1;SVLEN=6018;MEINFO=L1Ta1d,1,6019,-;DIFF=0.07:t231c,t254a,c367a,n380,n423-6019;LP=3;RP=15;RA=-2.322;ISTP=0;PRIOR=false;SR=5	.	0.000716332	.	.	.	.	.
4	106746791	TSD=AAGAGTACTGTT;ASSESS=5;INTERNAL=null,null;SVTYPE=LINE1;SVLEN=6019;MEINFO=L1Ta1d,0,6019,+;DIFF=0.07:n1-2,g142c,t231c,t254a,g328a,n382-6019;LP=28;RP=5;RA=2.485;ISTP=0;PRIOR=false;SR=18;GENE=LOC105377356;AF=0.000199681;AC=1	0.000199681	.	.	.	.	.	.
4	107003904	TSD=AGAAATTAAGTAAATCTTG;ASSESS=5;INTERNAL=NM_014421,INTRONIC;SVTYPE=LINE1;SVLEN=6012;MEINFO=L1Ta,7,6019,+;DIFF=0.12:n1-5676;LP=19;RP=11;RA=0.788;ISTP=0;PRIOR=false;SR=21;GENE=DKK2;AF=0.000199681;AC=1	0.000199681	.	.	.	.	.	.
4	107443356	TSD=AAAAACTCATACTG;ASSESS=5;INTERNAL=null,null;SVTYPE=LINE1;SVLEN=6001;MEINFO=L1Ta1d,18,6019,+;DIFF=0.11:g167a,t231c,t254a,c324a,n423-6019;LP=68;RP=53;RA=0.36;ISTP=0;PRIOR=false;SR=51	0.00119808	0.00286533	.	0.00375263	.	.	.
4	107524008	TSD=AGAAATAGAAATACAGGAG;ASSESS=5;INTERNAL=null,null;SVTYPE=LINE1;SVLEN=6018;MEINFO=L1Ta1d,1,6019,+;DIFF=0.11:g167a,t231c,t254a,c324a,n448,t465g,n474-6019;LP=33;RP=12;RA=1.459;ISTP=0;PRIOR=false;SR=23;AF=0.000199681;AC=1	0.000199681	.	.	.	.	.	.
4	108880717	TSD=CCCCACATTATGTTATT;ASSESS=5;INTERNAL=COL25A1,INTRONIC;SVTYPE=LINE1;SVLEN=6014;MEINFO=L1Ta1d,5,6019,-;DIFF=0.1:t231c,t254a,c324a,n481-6019;LP=14;RP=17;RA=-0.28;ISTP=0;PRIOR=false;SR=15;AF=0.000150105;AC=1	.	.	.	0.000150105	.	.	.
4	109154227	TSD=TCTAGGTTAAATATAT;ASSESS=5;INTERNAL=NM_032518,INTRONIC;SVTYPE=LINE1;SVLEN=6012;MEINFO=L1Ambig,7,6019,-;DIFF=0.08:n1-4,g10c,c12g,i73g,c115a,c143t,g167a,t231c,t254a,c257t,g352a,n516-6019;LP=1;RP=28;RA=-4.807;ISTP=0;PRIOR=false;SR=7	.	0.000716332	.	.	.	.	.
4	109231934	TSD=AAAGAATATCT;ASSESS=5;INTERNAL=NM_032518,INTRONIC;SVTYPE=LINE1;SVLEN=6019;MEINFO=L1Ta1d,0,6019,+;DIFF=0.09:n1-2,t231c,t254a,c327t,n462-6019;LP=41;RP=25;RA=0.714;ISTP=0;PRIOR=false;SR=30	0.000399361	0.00143266	.	.	.	.	.
4	109236735	TSD=AAAATATAATCTTGTTTTGA;ASSESS=5;INTERNAL=NM_032518,INTRONIC;SVTYPE=LINE1;SVLEN=6012;MEINFO=L1Ta1d,7,6019,+;DIFF=0.12:n1-7,t231c,t254a,c257a,c327t,n457-6019;LP=25;RP=13;RA=0.943;ISTP=0;PRIOR=false;SR=13;GENE=COL25A1;AF=0.000199681;AC=1	0.000199681	.	.	.	.	.	.
4	109771743	TSD=null;ASSESS=4;INTERNAL=CFI,INTRONIC;SVTYPE=LINE1;SVLEN=6007;MEINFO=L1Ambig,11,6018,+;DIFF=0:n1-4487,n4493,n4522,t4557c,n4558-4559,n4611,n4613,a4625c,n4626,n4632-4634,n4636,n4639-6019;LP=2;RP=1;RA=1;ISTP=-1;PRIOR=false;SR=1;AF=0.00555389;AC=37	.	.	.	0.00555389	.	.	.
4	109858233	TSD=CCCAATATGTATAGTTTTT;ASSESS=5;INTERNAL=LRIT3,INTRONIC;SVTYPE=LINE1;SVLEN=6013;MEINFO=L1Ta,6,6019,-;DIFF=0.08:n1-5718,n5733,c5802a,a5837c,c5945t,t5990g;LP=12;RP=16;RA=-0.415;ISTP=0;PRIOR=false;SR=18;AF=0.000150105;AC=1	.	.	.	0.000150105	.	.	.
4	110329542	TSD=AAAAATGAAAAATGCC;ASSESS=5;INTERNAL=null,null;SVTYPE=LINE1;SVLEN=6016;MEINFO=L1Ta1d,3,6019,+;DIFF=0.12:n1-3,c166t,n490,n506,n528-6019;LP=16;RP=12;RA=0.415;ISTP=0;PRIOR=false;SR=13;AF=0.000199681;AC=1	0.000199681	.	.	.	.	.	.
4	110499674	TSD=CAGCAATTTTTT;ASSESS=5;INTERNAL=NM_001977,INTRONIC;SVTYPE=LINE1;SVLEN=6015;MEINFO=L1Ta1d,3,6018,-;DIFF=0.1:n1-2,t231c,t254a,c327t,n343-429,n580-6019;LP=8;RP=9;RA=-0.17;ISTP=0;PRIOR=false;SR=6;GENE=ENPEP;AF=0.000199681;AC=1	0.000199681	.	.	.	.	.	.
4	110646675	TSD=GATATTTGCTCTTTTT;ASSESS=5;INTERNAL=null,null;SVTYPE=LINE1;SVLEN=6019;MEINFO=L1Ta,0,6019,-;DIFF=0.09:n1-5569,n5684,n5720-5759,a6006g;LP=16;RP=19;RA=-0.248;ISTP=0;PRIOR=false;SR=11;AF=0.000199681;AC=1	0.000199681	.	.	0.000150105	.	.	.
4	110941950	TSD=TCACTGAGCATTTTTCT;ASSESS=5;INTERNAL=null,null;SVTYPE=LINE1;SVLEN=6016;MEINFO=L1Ta1d,3,6019,-;DIFF=0.08:n1-2,t231c,t254a,n560-6019;LP=130;RP=665;RA=-2.355;ISTP=0;PRIOR=false;SR=462	0.0205671	0.0272206	.	0.0795557	.	.	.
4	110968080	TSD=TGAAGTCTTTCT;ASSESS=5;INTERNAL=null,null;SVTYPE=LINE1;SVLEN=6017;MEINFO=L1Ta1d,2,6019,-;DIFF=0.09:n1-2,t231c,t254a,c327t,n426-6019;LP=9;RP=24;RA=-1.415;ISTP=0;PRIOR=false;SR=12;AF=0.000199681;AC=1	0.000199681	.	.	.	.	.	.
4	111707817	TSD=TAAAGTATCTCATA;ASSESS=5;INTERNAL=null,null;SVTYPE=LINE1;SVLEN=6012;MEINFO=L1Ta1d,7,6019,+;DIFF=0.12:n1-7,t231c,t254a,c327t,n431,n442-6019;LP=9445;RP=5877;RA=0.684;ISTP=0;PRIOR=false;SR=7833	0.35623	0.351003	0.201888	0.25728	0.301587	0.301739	.
4	111795832	TSD=TTTATCTATCTATT;ASSESS=5;INTERNAL=null,null;SVTYPE=LINE1;SVLEN=6019;MEINFO=L1Ta,0,6019,-;DIFF=0.12:n1-5511,c5564g,n5747-5750;LP=132;RP=200;RA=-0.599;ISTP=0;PRIOR=false;SR=157;AF=0.00199681;AC=10	0.00199681	.	.	.	.	.	.
4	112419269	TSD=TACTAATTTTCTTTT;ASSESS=5;INTERNAL=NM_025144,INTRONIC;SVTYPE=LINE1;SVLEN=6018;MEINFO=L1Ta1d,1,6019,-;DIFF=0.12:n475-500,n525,n577,n651-6019;LP=14;RP=21;RA=-0.585;ISTP=0;PRIOR=false;SR=22	0.000199681	0.000716332	.	.	.	.	.
4	113292908	TSD=GAAATGTAAACTA;ASSESS=5;INTERNAL=ANK2,INTRONIC;SVTYPE=LINE1;SVLEN=6016;MEINFO=L1Ta1d,3,6019,+;DIFF=0.09:n1-3,t231c,t254a,c325a,c327t,n370-371,n422-6019;LP=24;RP=11;RA=1.126;ISTP=0;PRIOR=false;SR=31;AF=0.00030021;AC=2	.	.	.	0.00030021	.	.	.
4	114095469	TSD=AGAAATCTCGAAGAGC;ASSESS=5;INTERNAL=null,null;SVTYPE=LINE1;SVLEN=6019;MEINFO=L1Ta,0,6019,+;DIFF=0.13:n1-5464,n5615-5675,a5826t,a5837c;LP=16;RP=17;RA=-0.087;ISTP=0;PRIOR=false;SR=14;AF=0.000199681;AC=1	0.000199681	.	.	.	.	.	.
4	114605597	TSD=CCAAATCATGACTTTTT;ASSESS=5;INTERNAL=NM_001128174,INTRONIC;SVTYPE=LINE1;SVLEN=6019;MEINFO=L1Ta1d,0,6019,-;DIFF=0.09:c144g,t231c,t254a,n312-421,n458,n460,n524,n572-6019;LP=9;RP=21;RA=-1.222;ISTP=0;PRIOR=false;SR=10;GENE=UGT8;AF=0.000199681;AC=1	0.000199681	.	.	.	.	.	.
4	115897798	TSD=TGGAATGGCCTTTTA;ASSESS=5;INTERNAL=MIR1973,PROMOTER;SVTYPE=LINE1;SVLEN=6018;MEINFO=L1Ta1d,1,6019,-;DIFF=0.07:g167a,t223c,t231c,t254a,c324a,n352-6019;LP=27;RP=43;RA=-0.671;ISTP=0;PRIOR=false;SR=46;AF=0.000450315;AC=3	.	.	.	0.000450315	.	.	.
4	116420057	TSD=TACATTCTTTCTTT;ASSESS=5;INTERNAL=null,null;SVTYPE=LINE1;SVLEN=6018;MEINFO=L1Ambig,1,6019,-;DIFF=0.1:n1-3,i73g,c115a,c143t,g167a,t231c,t254a,c257t,n348-424,n460,n472,n475,n535,n575-6019;LP=153;RP=213;RA=-0.477;ISTP=0;PRIOR=false;SR=159	0.00379393	0.00859599	0.0125899	0.00060042	0.00793651	0.00609756	.
4	117485923	TSD=TCTAAAAAGGAATTTTA;ASSESS=5;INTERNAL=LINC01378,INTRONIC;SVTYPE=LINE1;SVLEN=6019;MEINFO=L1Ta1d,0,6019,-;DIFF=0.07:t231c,t254a,n294-6019;LP=11;RP=17;RA=-0.628;ISTP=0;PRIOR=false;SR=13;AF=0.000150105;AC=1	.	.	.	0.000150105	.	.	.
4	117847489	TSD=CACTGTTGTCTTATTCT;ASSESS=5;INTERNAL=null,null;SVTYPE=LINE1;SVLEN=6017;MEINFO=L1Ambig,2,6019,-;DIFF=0.11:i73g,t149g,t231c,t254a,t290c,g306a,g313a,c351t,c359g,a423g,c441a,n474-6019;LP=6;RP=19;RA=-1.663;ISTP=0;PRIOR=false;SR=16;GENE=LOC102723914;AF=0.000199681;AC=1	0.000199681	.	.	.	.	.	.
4	118143364	TSD=AAAATATTTCTTC;ASSESS=5;INTERNAL=NDST3,INTRONIC;SVTYPE=LINE1;SVLEN=6016;MEINFO=L1Ta1d,3,6019,+;DIFF=0.11:n1-3,t231c,t254a,c327t,n423-6019;LP=12;RP=15;RA=-0.322;ISTP=0;PRIOR=false;SR=14;AF=0.000150105;AC=1	.	.	.	0.000150105	.	.	.
4	118703204	TSD=CCCTCCTTTACTCTT;ASSESS=5;INTERNAL=METTL14,INTRONIC;SVTYPE=LINE1;SVLEN=6017;MEINFO=L1Ta1d,1,6018,+;DIFF=0.09:t231c,t254a,c269a,n385-6019;LP=6;RP=24;RA=-2;ISTP=0;PRIOR=false;SR=5;AF=0.000150105;AC=1	.	.	.	0.000150105	.	.	.
4	119112071	TSD=GCAAAGTGATGAACTTCT;ASSESS=5;INTERNAL=MYOZ2,PROMOTER;SVTYPE=LINE1;SVLEN=6019;MEINFO=L1Ta1d,0,6019,-;DIFF=0.1:n1-2,t231c,t254a,n360-6019;LP=55;RP=58;RA=-0.077;ISTP=0;PRIOR=false;SR=79;AF=0.000750525;AC=5	.	.	.	0.000750525	.	.	.
4	119210424	TSD=GTCAAATTCTT;ASSESS=5;INTERNAL=NR_125931,INTRONIC;SVTYPE=LINE1;SVLEN=6010;MEINFO=L1Ta1d,8,6018,-;DIFF=0.12:n1-7,c37t,g61a,t231c,t254a,g270a,g364c,g483a,n516,n548,n585-6019;LP=42;RP=103;RA=-1.294;ISTP=0;PRIOR=false;SR=23	0.00179712	0.00358166	.	0.00165116	.	.	.
4	119505833	TSD=AAAAAACTTCAGCTTT;ASSESS=5;INTERNAL=NM_001083,INTRONIC;SVTYPE=LINE1;SVLEN=6019;MEINFO=L1Ta1d,0,6019,+;DIFF=0.11:n1-2,t231c,t254a,c327t,n501-6019;LP=14;RP=6;RA=1.222;ISTP=0;PRIOR=false;SR=10;GENE=PDE5A;AF=0.000199681;AC=1	0.000199681	.	.	.	.	.	.
4	119912911	TSD=AGGAATTGTT;ASSESS=5;INTERNAL=null,null;SVTYPE=LINE1;SVLEN=6018;MEINFO=L1Ta,1,6019,-;DIFF=0.11:n1-5658,g5862t;LP=10;RP=13;RA=-0.379;ISTP=0;PRIOR=false;SR=19	.	0.000716332	.	.	.	.	.
4	119968697	TSD=AGATTGTTAGCTTTC;ASSESS=5;INTERNAL=LOC100996694,TERMINATOR;SVTYPE=LINE1;SVLEN=6018;MEINFO=L1Ta,1,6019,-;DIFF=0.1:n1-5695,g5847a;LP=133;RP=177;RA=-0.412;ISTP=0;PRIOR=false;SR=151;AF=0.00270189;AC=18	.	.	.	0.00270189	.	.	.
4	120189463	TSD=GGAAGTAGTTATT;ASSESS=5;INTERNAL=null,null;SVTYPE=LINE1;SVLEN=6018;MEINFO=L1Ta1d,1,6019,-;DIFF=0.09:n1-3,n465-6019;LP=15;RP=10;RA=0.585;ISTP=0;PRIOR=false;SR=8;AF=0.000199681;AC=1	0.000199681	.	.	.	.	.	.
4	120503223	TSD=CATCTTCCTGTCTTCTT;ASSESS=5;INTERNAL=PRDM5,TERMINATOR;SVTYPE=LINE1;SVLEN=6019;MEINFO=L1Ta1d,0,6019,-;DIFF=0.11:t231c,t254a,g397a,n420-6019;LP=27;RP=32;RA=-0.245;ISTP=0;PRIOR=false;SR=45;AF=0.00030021;AC=2	.	.	.	0.00030021	.	.	.
4	120567661	TSD=TGAAAACTTTT;ASSESS=5;INTERNAL=PRDM5,TERMINATOR;SVTYPE=LINE1;SVLEN=6017;MEINFO=L1Ta1d,2,6019,-;DIFF=0.07:n1,g210c,t231c,t254a,n359-6019;LP=7;RP=11;RA=-0.652;ISTP=0;PRIOR=false;SR=10;AF=0.000150105;AC=1	.	.	.	0.000150105	.	.	.
4	120692390	TSD=null;ASSESS=3;INTERNAL=PRDM5,3_UTR;SVTYPE=LINE1;SVLEN=6015;MEINFO=L1Ta1d,3,6018,+;DIFF=0.08:n1-2,t231c,t254a,n338-463,t490g,n534,n610,n615-6019;LP=30;RP=11;RA=1.447;ISTP=0;PRIOR=false;SR=8;AF=0.00030021;AC=2	.	.	.	0.00030021	.	.	.
4	121108784	TSD=CATCTCATTTCTT;ASSESS=5;INTERNAL=TNIP3,TERMINATOR;SVTYPE=LINE1;SVLEN=6015;MEINFO=L1Ta1d,4,6019,-;DIFF=0.1:n1-3,n425-6019;LP=6;RP=13;RA=-1.115;ISTP=0;PRIOR=false;SR=15;AF=0.000150105;AC=1	.	.	.	0.000150105	.	.	.
4	121640354	TSD=TCTAATTTTTTC;ASSESS=5;INTERNAL=ANXA5,TERMINATOR;SVTYPE=LINE1;SVLEN=6017;MEINFO=L1Ta1d,2,6019,-;DIFF=0.1:n1-2,t231c,t254a,c327t,n388-412,a415g,n420,n422,n424,n443-444,n448,n450,n454,n481,n516,n533,n562-6019;LP=23;RP=30;RA=-0.383;ISTP=0;PRIOR=false;SR=31;AF=0.00030021;AC=2	.	.	.	0.00030021	.	.	.
4	121997424	TSD=ATATATAACTG;ASSESS=5;INTERNAL=null,null;SVTYPE=LINE1;SVLEN=6019;MEINFO=L1Ta1d,0,6019,+;DIFF=0.1:t231c,t254a,c324a,n442-6019;LP=45;RP=29;RA=0.634;ISTP=0;PRIOR=false;SR=19	0.000998403	0.002149	.	0.00870609	.	.	.
4	122176904	TSD=GCTGTAGTTTAAATCTT;ASSESS=5;INTERNAL=NM_015312,INTRONIC;SVTYPE=LINE1;SVLEN=6019;MEINFO=L1Ta1d,0,6019,-;DIFF=0.09:c192a,t231c,t254a,n468-6019;LP=7;RP=14;RA=-1;ISTP=0;PRIOR=false;SR=17;GENE=KIAA1109;AF=0.000199681;AC=1	0.000199681	.	.	.	.	.	.
4	122236902	TSD=TACCTGAGTTTCT;ASSESS=5;INTERNAL=KIAA1109,INTRONIC;SVTYPE=LINE1;SVLEN=6018;MEINFO=L1Ambig,1,6019,-;DIFF=0.02:n56-156,n231-246,t254a,n291,n323-6019;LP=3;RP=5;RA=-0.737;ISTP=0;PRIOR=false;SR=7	.	.	.	.	.	.	1.00735e-05
4	122431648	TSD=null;ASSESS=3;INTERNAL=NM_001159295,TERMINATOR;SVTYPE=LINE1;SVLEN=6015;MEINFO=L1Ambig,3,6018,+;DIFF=0.08:n1-5103,t5160c,c5252t,n5456-6019;LP=2;RP=16;RA=-3;ISTP=0;PRIOR=false;SR=17	.	.	.	.	.	0.000869565	.
4	123627439	TSD=AAAGATGTTATTTGC;ASSESS=5;INTERNAL=null,null;SVTYPE=LINE1;SVLEN=6016;MEINFO=L1Ambig,3,6019,+;DIFF=0.1:n1-5426,g5538c,n5577-5617,a5712g,n5768-5808,a5842c,g5886t,c5913t,a5931g,g6014a;LP=20;RP=10;RA=1;ISTP=0;PRIOR=false;SR=12;AF=0.000199681;AC=1	0.000199681	.	.	0.000450315	.	.	.
4	124468439	TSD=CTGAAAAGCCTATTCT;ASSESS=5;INTERNAL=null,null;SVTYPE=LINE1;SVLEN=6018;MEINFO=L1Ta1d,1,6019,-;DIFF=0.11:g210c,t231c,t254a,a388g,n421,n443,n467,n508-6019;LP=10;RP=19;RA=-0.926;ISTP=0;PRIOR=false;SR=9	0.000798722	0.000716332	.	0.00390273	.	.	.
4	125671210	TSD=TTCATCTCAAATTTT;ASSESS=5;INTERNAL=MIR2054,TERMINATOR;SVTYPE=LINE1;SVLEN=6019;MEINFO=L1Ta1d,0,6019,-;DIFF=0.1:c144g,t231c,t254a,n385-6019;LP=10;RP=19;RA=-0.926;ISTP=0;PRIOR=false;SR=20;AF=0.000150105;AC=1	.	.	.	0.000150105	.	.	.
4	125919031	TSD=ATTAATGCTACATTTTA;ASSESS=5;INTERNAL=null,null;SVTYPE=LINE1;SVLEN=6019;MEINFO=L1Ta,0,6019,-;DIFF=0.1:n1-5588,n5635,n5679;LP=28;RP=20;RA=0.485;ISTP=0;PRIOR=false;SR=29;AF=0.000399361;AC=2	0.000399361	.	.	.	.	.	.
4	126221451	TSD=GCCAGGAATGGTTTC;ASSESS=5;INTERNAL=null,null;SVTYPE=LINE1;SVLEN=6016;MEINFO=L1Ta1d,3,6019,-;DIFF=0.1:n1-3,n440-6019;LP=8;RP=19;RA=-1.248;ISTP=0;PRIOR=false;SR=17	0.000199681	0.000716332	.	.	.	.	.
4	126296888	TSD=AGGAATGAATGC;ASSESS=5;INTERNAL=MIR2054,TERMINATOR;SVTYPE=LINE1;SVLEN=6012;MEINFO=L1Ta1d,7,6019,+;DIFF=0.08:n1-7,n11,t48a,t231c,t254a,a287g,n314-379,n389-390,n407-408,n410-412,n417,n422,n428,n455,n459,n494,n531-6019;LP=11;RP=10;RA=0.138;ISTP=0;PRIOR=false;SR=17;AF=0.000150105;AC=1	.	.	.	0.000150105	.	.	.
4	126541253	TSD=AAAAGTTTCTTCTTG;ASSESS=5;INTERNAL=null,null;SVTYPE=LINE1;SVLEN=6017;MEINFO=L1Ta1d,2,6019,+;DIFF=0.11:n1,t79c,a140g,t231c,t254a,g328a,a388g,n465,n469,n483-6019;LP=70;RP=25;RA=1.485;ISTP=0;PRIOR=false;SR=50;AF=0.000798722;AC=4	0.000798722	.	.	.	.	.	.
4	128044287	TSD=null;ASSESS=4;INTERNAL=null,null;SVTYPE=LINE1;SVLEN=6014;MEINFO=L1Ta1d,4,6018,+;DIFF=0.07:n1-3,n133,g156a,t231c,t254a,n318,n336,n343,n346,g352a,n361,n372,n409,n462-6019;LP=1355;RP=396;RA=1.775;ISTP=-1;PRIOR=false;SR=1081	0.0880591	0.101003	.	0.190633	0.0793651	0.0452174	.
4	128768286	TSD=TAAGAGTCATTTTA;ASSESS=5;INTERNAL=JADE1,PROMOTER;SVTYPE=LINE1;SVLEN=6018;MEINFO=L1Ta1d,1,6019,-;DIFF=0.09:n1-2,t231c,t254a,n317-6019;LP=10;RP=17;RA=-0.766;ISTP=0;PRIOR=false;SR=18;AF=0.000150105;AC=1	.	.	.	0.000150105	.	.	.
4	129342004	TSD=AAAAGGAATCTTGGTG;ASSESS=5;INTERNAL=null,null;SVTYPE=LINE1;SVLEN=6019;MEINFO=L1Ambig,0,6019,+;DIFF=0.1:n1-2,g38a,i72c,g83c,t153c,t231c,t254a,g313a,n319-328,n336,g352a,t361g,n383,t411a,n506-6019;LP=26;RP=17;RA=0.613;ISTP=0;PRIOR=false;SR=16;AF=0.000199681;AC=1	0.000199681	.	.	.	.	.	.
4	130428517	TSD=GCAACTGATTTTTT;ASSESS=5;INTERNAL=null,null;SVTYPE=LINE1;SVLEN=6014;MEINFO=L1Ta1d,4,6018,+;DIFF=0.09:n1-3,n351,n361,n383,n409,n415,n423,n427,c491t,n495-6019;LP=9;RP=15;RA=-0.737;ISTP=0;PRIOR=false;SR=12	0.000998403	0.000716332	.	.	.	.	.
4	131260507	TSD=GGGATGGGCATTTTC;ASSESS=5;INTERNAL=null,null;SVTYPE=LINE1;SVLEN=6019;MEINFO=L1Ta1d,0,6019,-;DIFF=0.12:t231c,t254a,c324a,n361,n383,c529a,n569-6019;LP=674;RP=970;RA=-0.525;ISTP=0;PRIOR=false;SR=798	0.0585064	0.0415473	0.0332734	0.0237166	0.111111	0.0759162	.
4	132265678	TSD=GTCTCTTGTATTTTA;ASSESS=5;INTERNAL=LINC01256,PROMOTER;SVTYPE=LINE1;SVLEN=6019;MEINFO=L1Ta1d,0,6019,-;DIFF=0.09:g307t,n321-322,n350-6019;LP=8;RP=19;RA=-1.248;ISTP=0;PRIOR=false;SR=23;AF=0.000150105;AC=1	.	.	.	0.000150105	.	.	.
4	134302280	TSD=AAGAGTGAAATATCA;ASSESS=5;INTERNAL=null,null;SVTYPE=LINE1;SVLEN=6012;MEINFO=L1Ta1d,7,6019,+;DIFF=0.13:n1-7,t231c,t254a,n489-6019;LP=20;RP=14;RA=0.515;ISTP=0;PRIOR=false;SR=12;AF=0.000199681;AC=1	0.000199681	.	.	.	.	.	.
4	134385696	TSD=CAAAATGATTTTC;ASSESS=5;INTERNAL=null,null;SVTYPE=LINE1;SVLEN=6017;MEINFO=L1Ta,2,6019,-;DIFF=0.05:n1-5701;LP=85;RP=11;RA=2.95;ISTP=0;PRIOR=false;SR=62;GENE=LOC105377434;AF=0.00579073;AC=29	0.00579073	.	.	0.0276193	.	.	.
4	134846666	TSD=AAGAACAAGAAATA;ASSESS=5;INTERNAL=null,null;SVTYPE=LINE1;SVLEN=6018;MEINFO=L1Ta1d,1,6019,+;DIFF=0.13:n1,t231c,t254a,a423g,n538-6019;LP=33;RP=20;RA=0.722;ISTP=0;PRIOR=false;SR=33;AF=0.000399361;AC=2	0.000399361	.	.	.	.	.	.
4	136628584	TSD=CAGAGATATACTT;ASSESS=5;INTERNAL=null,null;SVTYPE=LINE1;SVLEN=6019;MEINFO=L1Ta1d,0,6019,-;DIFF=0.09:t231c,t254a,n493-6019;LP=5;RP=17;RA=-1.766;ISTP=0;PRIOR=false;SR=7	0.000199681	0.000716332	.	.	.	.	.
4	137239772	TSD=AATTGGATGACTTTTC;ASSESS=5;INTERNAL=null,null;SVTYPE=LINE1;SVLEN=6007;MEINFO=L1Ambig,12,6019,-;DIFF=0.12:n1-44,i73g,c115a,c143t,g167a,t231c,t254a,c257t,g352a,n449,n528-6019;LP=10;RP=22;RA=-1.138;ISTP=0;PRIOR=false;SR=22;GENE=LOC105377441;AF=0.000199681;AC=1	0.000199681	.	.	.	.	.	.
4	137768979	TSD=AGAAAAGATG;ASSESS=5;INTERNAL=null,null;SVTYPE=LINE1;SVLEN=6019;MEINFO=L1Ambig,0,6019,+;DIFF=0.05:n1-2007,n2337-6019;LP=23;RP=1;RA=4.524;ISTP=0;PRIOR=false;SR=8	.	.	.	.	.	0.000869565	.
4	137952847	TSD=ATGTATGGAATTTTCT;ASSESS=5;INTERNAL=null,null;SVTYPE=LINE1;SVLEN=6019;MEINFO=L1Ta1d,0,6019,-;DIFF=0.07:t231c,t254a,n294-323,n474-6019;LP=7;RP=19;RA=-1.441;ISTP=0;PRIOR=false;SR=17;GENE=LOC107986315;AF=0.000199681;AC=1	0.000199681	.	.	.	.	.	.
4	138187670	TSD=TCTCATGTATTCTTT;ASSESS=5;INTERNAL=NM_014331,INTRONIC;SVTYPE=LINE1;SVLEN=6012;MEINFO=L1Ta1d,7,6019,-;DIFF=0.09:n1-7,c37t,g61a,t231c,t254a,c448t,n451,g483a,n495,n554-6019;LP=8;RP=15;RA=-0.907;ISTP=0;PRIOR=false;SR=5;GENE=SLC7A11;AF=0.000199681;AC=1	0.000199681	.	.	.	.	.	.
4	138309902	TSD=TCTCTCTTTTCTGTT;ASSESS=5;INTERNAL=LINC00499,INTRONIC;SVTYPE=LINE1;SVLEN=6012;MEINFO=L1Ta1d,7,6019,-;DIFF=0.1:n1-4,t231c,t254a,a423g,n485-6019;LP=16;RP=35;RA=-1.129;ISTP=0;PRIOR=false;SR=35;AF=0.00030021;AC=2	.	.	.	0.00030021	.	.	.
4	138404224	TSD=AAAGAAAGAAATATA;ASSESS=5;INTERNAL=NR_051987,INTRONIC;SVTYPE=LINE1;SVLEN=6019;MEINFO=L1Ta1d,0,6019,+;DIFF=0.11:n544-6019;LP=134;RP=88;RA=0.607;ISTP=0;PRIOR=false;SR=102;GENE=LOC105377446;AF=0.00159744;AC=8	0.00159744	.	.	.	.	.	.
4	138690735	TSD=ACATCTCACTGTACTCTT;ASSESS=5;INTERNAL=null,null;SVTYPE=LINE1;SVLEN=6018;MEINFO=L1Ta1d,1,6019,-;DIFF=0.1:g167a,t231c,t254a,c324a,n338-379,c529a,n547-6019;LP=5;RP=23;RA=-2.202;ISTP=0;PRIOR=false;SR=5;AF=0.000199681;AC=1	0.000199681	.	.	.	.	.	.
4	138760326	TSD=AGAAGCAAACCAGT;ASSESS=5;INTERNAL=null,null;SVTYPE=LINE1;SVLEN=6019;MEINFO=L1Ta,0,6019,+;DIFF=0.11:n1-5538,n5742,n5750;LP=14;RP=9;RA=0.637;ISTP=0;PRIOR=false;SR=14	0.000199681	0.000716332	.	0.00135095	.	0.000869565	.
4	141179296	TSD=GACTTCATTTCT;ASSESS=5;INTERNAL=null,null;SVTYPE=LINE1;SVLEN=6014;MEINFO=L1Ta1d,5,6019,-;DIFF=0.08:n1-4,c37a,t231c,g252c,t254a,g285a,c363t,n505-6019;LP=1;RP=21;RA=-4.392;ISTP=0;PRIOR=false;SR=12	0.000199681	0.000716332	.	.	.	0.000869565	.
4	141721673	TSD=GAGCCAGTTTATTTAT;ASSESS=5;INTERNAL=NM_000585,INTRONIC;SVTYPE=LINE1;SVLEN=6019;MEINFO=L1Ta1d,0,6019,-;DIFF=0.06:g210c,t231c,t254a,n330-6019;LP=3;RP=12;RA=-2;ISTP=0;PRIOR=false;SR=6	0.000798722	.	.	0.0090063	.	0.000869565	.
4	141810637	TSD=null;ASSESS=3;INTERNAL=IL15,TERMINATOR;SVTYPE=LINE1;SVLEN=6015;MEINFO=L1Ta1d,3,6018,+;DIFF=0.05:n1-2,t231c,t254a,n317-410,n412-413,n415,n419,n421,n423,n425,a426c,n427-429,n431,n434-442,n444,n447-450,n452,n463,n469,n473-474,n476-477,n483,n489,t496a,n497-499,n511,n562-6019;LP=12;RP=2;RA=2.585;ISTP=0;PRIOR=false;SR=1;AF=0.00540378;AC=36	.	.	.	0.00540378	.	.	.
4	142205818	TSD=GATAGTTCTT;ASSESS=5;INTERNAL=NM_001101669,INTRONIC;SVTYPE=LINE1;SVLEN=6018;MEINFO=L1Ambig,1,6019,-;DIFF=0.04:n1-3,i73g,c115a,g167a,t231c,t254a,c257t,n285-6019;LP=1;RP=11;RA=-3.459;ISTP=0;PRIOR=false;SR=7	.	.	.	.	.	0.000869565	.
4	142581820	TSD=AAGACTCCT;ASSESS=5;INTERNAL=NM_001101669,INTRONIC;SVTYPE=LINE1;SVLEN=6018;MEINFO=L1Ta1d,1,6019,+;DIFF=0.12:n1-16,c144g,t231c,t254a,n501-6019;LP=28;RP=20;RA=0.485;ISTP=0;PRIOR=false;SR=22	.	0.00143266	.	.	.	.	.
4	145030514	TSD=AAAGAGTCATTTCGG;ASSESS=5;INTERNAL=ANAPC10,INTRONIC;SVTYPE=LINE1;SVLEN=6012;MEINFO=L1Ta1d,7,6019,+;DIFF=0.08:n1-7,t231c,t254a,c327t,n373-6019;LP=15;RP=4;RA=1.907;ISTP=0;PRIOR=false;SR=6;AF=0.000150105;AC=1	.	.	.	0.000150105	.	.	.
4	146220485	TSD=TAATTTTCTCTCTT;ASSESS=5;INTERNAL=null,null;SVTYPE=LINE1;SVLEN=6014;MEINFO=L1Ta1d,5,6019,-;DIFF=0.12:n1-4,t231c,t254a,n590-6019;LP=19;RP=29;RA=-0.61;ISTP=0;PRIOR=false;SR=16	0.00399361	0.00143266	.	.	.	.	.
4	146304144	TSD=AAGAAGTTAAAATAG;ASSESS=5;INTERNAL=NM_001029998,INTRONIC;SVTYPE=LINE1;SVLEN=6018;MEINFO=L1Ta1d,1,6019,+;DIFF=0.09:g38c,n296-356,n378,n385,n421,n507-6019;LP=13072;RP=9020;RA=0.535;ISTP=0;PRIOR=false;SR=11867	0.690296	0.712034	0.642086	0.729361	0.619048	0.661739	.
4	146918283	TSD=AAGAAAAAAACTAG;ASSESS=5;INTERNAL=NM_001300761,INTRONIC;SVTYPE=LINE1;SVLEN=6017;MEINFO=L1Ta1d,2,6019,+;DIFF=0.11:n1,t231c,t254a,a423g,n452-6019;LP=66;RP=37;RA=0.835;ISTP=0;PRIOR=false;SR=59;GENE=TTC29;AF=0.000798722;AC=4	0.000798722	.	.	0.00105074	.	.	.
4	148043109	TSD=AAAACCAGTATATG;ASSESS=5;INTERNAL=NM_024605,INTRONIC;SVTYPE=LINE1;SVLEN=6018;MEINFO=L1Ta1d,1,6019,+;DIFF=0.1:n1,t231c,t254a,n349-6019;LP=22;RP=17;RA=0.372;ISTP=0;PRIOR=false;SR=27;GENE=ARHGAP10;AF=0.000399361;AC=2	0.000399361	.	.	.	.	.	.
4	148307846	TSD=null;ASSESS=3;INTERNAL=NM_000901,INTRONIC;SVTYPE=LINE1;SVLEN=6019;MEINFO=L1Ta1d,0,6019,+;DIFF=0.09:n1-2,t231c,t254a,n326,n423-561,n568,n572,n575,n601,n606,n616,c649g,n675-678,n711,n716-6019;LP=14;RP=9;RA=0.637;ISTP=0;PRIOR=false;SR=6;GENE=NR3C2;AF=0.000199681;AC=1	0.000199681	.	.	.	.	.	.
4	148307882	TSD=null;ASSESS=4;INTERNAL=NM_000901,INTRONIC;SVTYPE=LINE1;SVLEN=6019;MEINFO=L1Ta1d,0,6019,+;DIFF=0.1:n1-2,t231c,t254a,n384,a423g,n447-6019;LP=19;RP=11;RA=0.788;ISTP=-1;PRIOR=false;SR=16	.	0.000716332	.	.	.	.	.
4	148558293	TSD=AGAAAAATGCATGTATA;ASSESS=5;INTERNAL=null,null;SVTYPE=LINE1;SVLEN=6019;MEINFO=L1Ta1d,0,6019,+;DIFF=0.11:g167a,t231c,t254a,c324a,c529a,n549-6019;LP=16;RP=8;RA=1;ISTP=0;PRIOR=false;SR=15	0.000199681	0.000716332	.	.	.	.	.
4	149315706	TSD=null;ASSESS=3;INTERNAL=LOC101927849,TERMINATOR;SVTYPE=LINE1;SVLEN=6017;MEINFO=L1Ta1d,2,6019,-;DIFF=0.09:n1-2,t149g,t231c,t254a,n362-6019;LP=8;RP=12;RA=-0.585;ISTP=-1;PRIOR=false;SR=6;AF=0.000150105;AC=1	.	.	.	0.000150105	.	.	.
4	149707338	TSD=GAAACTGCAAATAT;ASSESS=5;INTERNAL=null,null;SVTYPE=LINE1;SVLEN=6019;MEINFO=L1Ta1d,0,6019,+;DIFF=0.12:n1-5,t231c,t254a,c327t,n508-6019;LP=18;RP=14;RA=0.363;ISTP=0;PRIOR=false;SR=17	0.000199681	0.000716332	.	.	.	.	.
4	149877690	TSD=GAAAGCCATATTTTT;ASSESS=5;INTERNAL=null,null;SVTYPE=LINE1;SVLEN=6017;MEINFO=L1Ta1d,2,6019,-;DIFF=0.11:n1-2,c60t,t231c,t254a,g378a,n482-6019;LP=345;RP=447;RA=-0.374;ISTP=0;PRIOR=false;SR=361	0.0355431	0.017192	0.00629496	0.0147103	.	0.00695652	.
4	150992925	TSD=AAGAAGTAAAGGCA;ASSESS=5;INTERNAL=NM_006726,INTRONIC;SVTYPE=LINE1;SVLEN=6019;MEINFO=L1Ta,0,6019,+;DIFF=0.13:n1-5539,n5649,n5690-5718;LP=15;RP=20;RA=-0.415;ISTP=0;PRIOR=false;SR=15;GENE=LRBA;AF=0.000199681;AC=1	0.000199681	.	.	.	.	.	.
4	151302552	TSD=AAAGAGTGAGATAG;ASSESS=5;INTERNAL=null,null;SVTYPE=LINE1;SVLEN=6018;MEINFO=L1Ta1d,1,6019,+;DIFF=0.11:n1,t231c,t254a,g318t,n328-336,n341,n346,n523-6019;LP=25;RP=14;RA=0.837;ISTP=0;PRIOR=false;SR=14	0.00139776	0.000716332	.	.	.	.	.
4	151409211	TSD=null;ASSESS=3;INTERNAL=NM_001109977,PROMOTER;SVTYPE=LINE1;SVLEN=6006;MEINFO=L1Ta1d,12,6018,-;DIFF=0.1:n1-11,n231-255,g352a,g523a,n556-6019;LP=226;RP=49;RA=2.205;ISTP=-1;PRIOR=false;SR=11;GENE=LOC105377486;AF=0.000399361;AC=2	0.000399361	.	.	.	.	.	.
4	151507641	TSD=AGGATATGCTTTC;ASSESS=5;INTERNAL=NM_001109977,INTRONIC;SVTYPE=LINE1;SVLEN=6008;MEINFO=L1Ta,11,6019,+;DIFF=0.12:n1-5538,a5784t,a6006g;LP=40;RP=19;RA=1.074;ISTP=0;PRIOR=false;SR=29	0.00119808	0.00143266	.	.	.	.	.
4	151811671	TSD=TCACCACTTTTTTT;ASSESS=5;INTERNAL=null,null;SVTYPE=LINE1;SVLEN=6019;MEINFO=L1Ta1d,0,6019,-;DIFF=0.1:n1-2,t231c,t254a,n447-6019;LP=525;RP=1049;RA=-0.999;ISTP=0;PRIOR=false;SR=577	0.0349441	0.0393983	0.0179856	0.0153107	0.0952381	0.0878261	.
4	151925699	TSD=GATTCACTTCTCTTT;ASSESS=5;INTERNAL=null,null;SVTYPE=LINE1;SVLEN=6019;MEINFO=L1Ta,0,6019,-;DIFF=0.09:n1-5532,n5535,g5536t,n5545-5545,n5547,t5548g,n5563-5563,n5565,c5572g,g5573c,n5576-5578,n5580,n5584,n5594-5595,n5601,n5604-5605,n5609,n5612,n5617,n5620,n5623-5625,n5627,n5629,a5631t,n5634,n5638,n5640,n5647,t5648g,n5650-5650,n5654,n5656-5657,n5660-5661,a5663g,a5665c,n5669-5671,n5675,n5678-5721,n57…	0.000199681	.	.	.	.	.	.
4	152443585	TSD=null;ASSESS=3;INTERNAL=NM_001257069,INTRONIC;SVTYPE=LINE1;SVLEN=6017;MEINFO=L1Ta,1,6018,+;DIFF=0.09:n1-5617,n5640,n5688,a5712g;LP=16;RP=26;RA=-0.7;ISTP=0;PRIOR=false;SR=12	0.000599042	0.00143266	.	0.00330231	.	.	.
4	153839640	TSD=CTGAAAGTAATTTTTT;ASSESS=5;INTERNAL=null,null;SVTYPE=LINE1;SVLEN=6018;MEINFO=L1Ta1d,1,6019,-;DIFF=0.11:n393-624,n628,n653,n670,n694,t696g,t700g,n728,n766,n775-6019;LP=15;RP=9;RA=0.737;ISTP=0;PRIOR=false;SR=17;GENE=LOC101927947;AF=0.000199681;AC=1	0.000199681	.	.	.	.	.	.
4	155443416	TSD=AAGAGTCAAATTA;ASSESS=5;INTERNAL=LOC102724776,TERMINATOR;SVTYPE=LINE1;SVLEN=6019;MEINFO=L1Ambig,0,6019,+;DIFF=0.08:i73g,t254a,n336-6019;LP=16;RP=11;RA=0.541;ISTP=0;PRIOR=false;SR=14;AF=0.000150105;AC=1	.	.	.	0.000150105	.	.	.
4	155807754	TSD=GCTATATTTCTTTTT;ASSESS=5;INTERNAL=GUCY1B3,TERMINATOR;SVTYPE=LINE1;SVLEN=6018;MEINFO=L1Ta,1,6019,-;DIFF=0.1:n1-5698,t6012g;LP=9;RP=17;RA=-0.918;ISTP=0;PRIOR=false;SR=8;AF=0.000150105;AC=1	.	.	.	0.000150105	.	.	.
4	155916185	TSD=null;ASSESS=4;INTERNAL=TDO2,INTRONIC;SVTYPE=LINE1;SVLEN=6015;MEINFO=L1Ta,3,6018,-;DIFF=0.06:n1-5739,c5950a;LP=26;RP=20;RA=0.379;ISTP=0;PRIOR=false;SR=14;AF=0.000450315;AC=3	.	.	.	0.000450315	.	.	.
4	156757420	TSD=dATATAT;ASSESS=5;INTERNAL=NR_036641,TERMINATOR;SVTYPE=LINE1;SVLEN=6019;MEINFO=L1Ta,0,6019,-;DIFF=0.13:n1-5573;LP=22;RP=29;RA=-0.399;ISTP=0;PRIOR=false;SR=31	.	0.00143266	.	0.00060042	.	.	.
4	157986137	TSD=GGGTAACCATTCTTTCTT;ASSESS=5;INTERNAL=null,null;SVTYPE=LINE1;SVLEN=6018;MEINFO=L1Ambig,1,6019,-;DIFF=0.13:n1-5467,n5493,c5494t,n5496-5496,n5511,n5513,n5533-5534,t5535g,g5538c,a5544t,n5555-5555,n5557,n5560,n5584,a5589t,c5590t,n5597-5598,a5599t,n5601-5601,n5612,n5618-5645,a5712g,a5831t,g5882a,a5931g,t5992c;LP=4343;RP=4656;RA=-0.1;ISTP=0;PRIOR=false;SR=4322	0.188898	0.191261	0.215827	0.135245	0.253968	0.252174	.
4	160770006	TSD=TAAATGGCTGTTCT;ASSESS=5;INTERNAL=null,null;SVTYPE=LINE1;SVLEN=6018;MEINFO=L1Ta1d,1,6019,-;DIFF=0.13:n1,g210c,t231c,t254a,a388g,c418g,n497,g498a,n556-556,n601,n608-6019;LP=47;RP=59;RA=-0.328;ISTP=0;PRIOR=false;SR=48	0.00199681	0.002149	.	0.00735515	.	0.000869565	.
4	164303864	TSD=GACATTTTATTTTCTT;ASSESS=5;INTERNAL=NM_001166373,INTRONIC;SVTYPE=LINE1;SVLEN=6010;MEINFO=L1Ta1d,8,6018,-;DIFF=0.1:n1-7,t231c,t254a,c327t,n408-409,n473,n485-6019;LP=24;RP=48;RA=-1;ISTP=0;PRIOR=false;SR=12	0.000798722	0.00143266	.	.	.	.	.
4	164598868	TSD=AAGAAACTCTTA;ASSESS=5;INTERNAL=null,null;SVTYPE=LINE1;SVLEN=6019;MEINFO=L1Ta1d,0,6019,+;DIFF=0.11:n1-2,t231c,t254a,c327t,n419-6019;LP=26;RP=14;RA=0.893;ISTP=0;PRIOR=false;SR=15;AF=0.000199681;AC=1	0.000199681	.	.	.	.	.	.
4	164610853	TSD=null;ASSESS=3;INTERNAL=null,null;SVTYPE=LINE1;SVLEN=6014;MEINFO=L1Ta1d,4,6018,-;DIFF=0.09:n1-3,n322-6019;LP=103;RP=97;RA=0.087;ISTP=-1;PRIOR=false;SR=35;AF=0.0385383;AC=193	0.0385383	.	.	.	.	.	.
4	164610876	TSD=AAAAAAAAAAAAAAAAAAAAAAA;ASSESS=5;INTERNAL=null,null;SVTYPE=LINE1;SVLEN=6014;MEINFO=L1Ta,4,6018,-;DIFF=0.09:n1-5640,n5793-5794,n5807,n5826-5827,n5833,n5913;LP=35;RP=15;RA=1.222;ISTP=0;PRIOR=false;SR=11	.	0.0358166	.	.	.	.	.
4	165449976	TSD=AAAAGAATCATGAACTT;ASSESS=5;INTERNAL=NM_001873,INTRONIC;SVTYPE=LINE1;SVLEN=6016;MEINFO=L1Ta1d,3,6019,+;DIFF=0.07:n1-3,g67t,t231c,t254a,g328a,a373g,n391-6019;LP=43;RP=10;RA=2.104;ISTP=0;PRIOR=false;SR=32;GENE=CPE;AF=0.000399361;AC=2	0.000399361	.	.	.	.	.	.
4	165465512	TSD=CTGTCTTATAGATTTTT;ASSESS=5;INTERNAL=NM_001873,INTRONIC;SVTYPE=LINE1;SVLEN=6019;MEINFO=L1Ambig,0,6019,-;DIFF=0.09:n1-3,i73g,c115a,c143t,g167a,t231c,t254a,c257t,g352a,n411-6019;LP=3;RP=19;RA=-2.663;ISTP=0;PRIOR=false;SR=9;GENE=CPE;AF=0.000199681;AC=1	0.000199681	.	.	0.000150105	.	.	.
4	165843464	TSD=AAAGAAACACAGTC;ASSESS=5;INTERNAL=null,null;SVTYPE=LINE1;SVLEN=6019;MEINFO=L1Ta1d,0,6019,+;DIFF=0.13:n584-6019;LP=26;RP=10;RA=1.379;ISTP=0;PRIOR=false;SR=11	0.000399361	0.000716332	.	0.00060042	.	.	.
4	166072350	TSD=TAATAATAACTCTTCTT;ASSESS=5;INTERNAL=NM_012464,INTRONIC;SVTYPE=LINE1;SVLEN=6004;MEINFO=L1Ta1d,15,6019,-;DIFF=0.1:n1-13,n24,t231c,t254a,c327t,n437-6019;LP=11;RP=15;RA=-0.447;ISTP=0;PRIOR=false;SR=11;GENE=TLL1;AF=0.000199681;AC=1	0.000199681	.	.	.	.	.	.
4	166493827	TSD=GCATTTTTTA;ASSESS=5;INTERNAL=null,null;SVTYPE=LINE1;SVLEN=6018;MEINFO=L1Ta1d,1,6019,-;DIFF=0.12:c144g,t231c,t254a,n463-6019;LP=22;RP=50;RA=-1.184;ISTP=0;PRIOR=false;SR=39;AF=0.000599042;AC=3	0.000599042	.	.	.	.	.	.
4	166524282	TSD=null;ASSESS=3;INTERNAL=null,null;SVTYPE=LINE1;SVLEN=6010;MEINFO=L1Ta1d,8,6018,+;DIFF=0.04:n1-7,t231c,t254a,n277-278,n327-6019;LP=2;RP=15;RA=-2.907;ISTP=0;PRIOR=false;SR=6	.	.	.	.	.	0.000869565	.
4	166524297	TSD=GGAGTCGGAATTCTT;ASSESS=5;INTERNAL=null,null;SVTYPE=LINE1;SVLEN=6012;MEINFO=L1Ta1d,7,6019,-;DIFF=0.11:n1-7,t231c,t254a,c327t,n383,n466-6019;LP=21;RP=33;RA=-0.652;ISTP=0;PRIOR=false;SR=26;AF=0.000599042;AC=3	0.000599042	.	.	0.000150105	.	.	.
4	167219658	TSD=null;ASSESS=4;INTERNAL=NM_001204358,INTRONIC;SVTYPE=LINE1;SVLEN=6016;MEINFO=L1Ta1d,3,6019,+;DIFF=0.05:n1-2,t231c,t254a,a331t,n348-6019;LP=16;RP=1;RA=4;ISTP=-1;PRIOR=false;SR=10	.	.	.	.	.	0.000869565	.
4	167517679	TSD=AATAAATTTTCTT;ASSESS=5;INTERNAL=SPOCK3,PROMOTER;SVTYPE=LINE1;SVLEN=6019;MEINFO=L1Ta1d,0,6019,+;DIFF=0.07:t231c,t254a,n401-6019;LP=51;RP=6;RA=3.087;ISTP=0;PRIOR=false;SR=39;AF=0.00060042;AC=4	.	.	.	0.00060042	.	.	.
4	168896358	TSD=TAAAATAAAGTATTGA;ASSESS=5;INTERNAL=PALLD,INTRONIC;SVTYPE=LINE1;SVLEN=6019;MEINFO=L1Ta1d,0,6019,+;DIFF=0.09:g210c,t231c,t254a,n357-6019;LP=13;RP=8;RA=0.7;ISTP=0;PRIOR=false;SR=14;AF=0.000150105;AC=1	.	.	.	0.000150105	.	.	.
4	169027145	TSD=null;ASSESS=4;INTERNAL=null,null;SVTYPE=LINE1;SVLEN=6014;MEINFO=L1Ambig,4,6018,-;DIFF=0.02:n1-4468,t4557c,c4576a,t4590c,n4621-6019;LP=3;RP=4;RA=-0.415;ISTP=0;PRIOR=false;SR=1	.	.	.	.	.	0.000869565	.
4	169476804	TSD=AAGAATTATTC;ASSESS=5;INTERNAL=NM_001199399,INTRONIC;SVTYPE=LINE1;SVLEN=6017;MEINFO=L1Ta1d,2,6019,+;DIFF=0.05:n1-2,t231c,t254a,n255-256,t268g,n279,n288-292,n306-6019;LP=17;RP=2;RA=3.087;ISTP=0;PRIOR=false;SR=11;GENE=NEK1	.	.	.	.	0.00793651	.	.
4	170314487	TSD=TATTTGTGTTTTTTTT;ASSESS=5;INTERNAL=null,null;SVTYPE=LINE1;SVLEN=6011;MEINFO=L1Ambig,8,6019,-;DIFF=0.1:n1-7,i73g,c115a,c143t,g167a,t231c,t254a,c257t,g352a,n369-402,n553-6019;LP=7;RP=13;RA=-0.893;ISTP=0;PRIOR=false;SR=14	0.000399361	0.000716332	.	0.00105074	.	.	.
4	171865146	TSD=null;ASSESS=3;INTERNAL=NM_001034845,INTRONIC;SVTYPE=LINE1;SVLEN=6015;MEINFO=L1Ta,3,6018,+;DIFF=0.07:n1-5676,n5734;LP=6;RP=7;RA=-0.222;ISTP=0;PRIOR=false;SR=4	.	0.000716332	.	.	.	.	.
4	171865163	TSD=AAAAAAAAAAAAGATTT;ASSESS=5;INTERNAL=GALNTL6,INTRONIC;SVTYPE=LINE1;SVLEN=6015;MEINFO=L1Ta,3,6018,+;DIFF=0.06:n1-5671,n5682,n5685-5686,n5694,n5709,t5720a,n5724,n5726,n5733,n5745,n5752,c5788a,c5796a;LP=75;RP=100;RA=-0.415;ISTP=0;PRIOR=false;SR=74;AF=0.00240168;AC=16	.	.	.	0.00240168	.	.	.
4	172615946	TSD=TTATTTCTTTT;ASSESS=5;INTERNAL=NM_001034845,INTRONIC;SVTYPE=LINE1;SVLEN=6019;MEINFO=L1Ta1d,0,6019,-;DIFF=0.12:c144g,t231c,t254a,n376-6019;LP=21;RP=27;RA=-0.363;ISTP=0;PRIOR=false;SR=22	0.00119808	0.00143266	.	.	.	.	.
4	173036273	TSD=TGCATCTTTA;ASSESS=5;INTERNAL=NM_001034845,INTRONIC;SVTYPE=LINE1;SVLEN=6017;MEINFO=L1Ta1d,2,6019,-;DIFF=0.09:n1,n364,n392-6019;LP=34;RP=47;RA=-0.467;ISTP=0;PRIOR=false;SR=36	0.00179712	0.002149	0.0418165	.	0.015873	0.0026087	.
4	175068040	TSD=TAAAATTCACACAGCTGT;ASSESS=5;INTERNAL=null,null;SVTYPE=LINE1;SVLEN=6019;MEINFO=L1Ta1d,0,6019,+;DIFF=0.07:t231c,t254a,n391-6019;LP=12;RP=3;RA=2;ISTP=0;PRIOR=false;SR=15	0.000199681	0.000716332	.	.	.	.	.
4	176194409	TSD=AAGATTTTTA;ASSESS=5;INTERNAL=NM_144644,INTRONIC;SVTYPE=LINE1;SVLEN=6019;MEINFO=L1Ta1d,0,6019,+;DIFF=0.12:c89g,c155t,t231c,t254a,c351g,a423g,n477-6019;LP=16;RP=12;RA=0.415;ISTP=0;PRIOR=false;SR=9;GENE=SPATA4;AF=0.000199681;AC=1	0.000199681	.	.	0.000150105	.	.	.
4	179449895	TSD=CATTTACATATTCTCTT;ASSESS=5;INTERNAL=null,null;SVTYPE=LINE1;SVLEN=6016;MEINFO=L1Ta1d,3,6019,-;DIFF=0.09:n1-3,c11g,g138a,t231c,t254a,c320t,g352a,t358c,n410-6019;LP=11;RP=14;RA=-0.348;ISTP=0;PRIOR=false;SR=13	0.000998403	0.000716332	.	.	.	.	.
4	180181180	TSD=CAACATTTCTT;ASSESS=5;INTERNAL=LINC00290,TERMINATOR;SVTYPE=LINE1;SVLEN=6016;MEINFO=L1Ambig,3,6019,-;DIFF=0.07:n1-787,g802c,n963-1004,c1029t,n1156-6019;LP=7;RP=8;RA=-0.193;ISTP=0;PRIOR=false;SR=6;AF=0.000150105;AC=1	.	.	.	0.000150105	.	.	.
4	182139613	TSD=CTATGATAACTCTT;ASSESS=5;INTERNAL=NR_027107,3_UTR;SVTYPE=LINE1;SVLEN=6015;MEINFO=L1Ambig,4,6019,-;DIFF=0.03:n1-95,t231c,t254a,n293-309,g364a,n460-6019;LP=2;RP=4;RA=-1;ISTP=0;PRIOR=false;SR=6;GENE=TENM3;AF=0.000199681;AC=1	0.000199681	.	.	.	.	.	.
4	182785712	TSD=null;ASSESS=3;INTERNAL=TENM3,INTRONIC;SVTYPE=LINE1;SVLEN=6009;MEINFO=L1Ta1d,9,6018,+;DIFF=0.04:n1-8,c60a,g138a,c143t,t149g,t153c,g161a,c171t,c181a,n197,n199,n219,t231c,g232c,t254a,c274a,n286,n290-455,a486g,n604-620,n657,g668a,n678-679,n682-683,t708c,c833a,t847c,g853a,n857,n885,c886a,n913-6019;LP=4;RP=10;RA=-1.322;ISTP=0;PRIOR=false;SR=1;GENE=TENM3	.	.	0.0067446	.	.	.	.
4	182785733	TSD=AAAAAAAAAAAAAAAAAAAAA;ASSESS=5;INTERNAL=NM_001080477,INTRONIC;SVTYPE=LINE1;SVLEN=6017;MEINFO=L1Ambig,1,6018,+;DIFF=0:n1-5445,n5448,n5459-5460,n5495,t5535g,g5538c,n5560-6019;LP=7;RP=7;RA=0;ISTP=0;PRIOR=false;SR=14	.	.	.	.	.	0.0495652	.
4	183843741	TSD=CTCTTTTTCTT;ASSESS=5;INTERNAL=null,null;SVTYPE=LINE1;SVLEN=6018;MEINFO=L1Ta1d,1,6019,-;DIFF=0.11:n1-2,t231c,t254a,n463-6019;LP=40;RP=69;RA=-0.787;ISTP=0;PRIOR=false;SR=58;GENE=STOX2;AF=0.000798722;AC=4	0.000798722	.	.	.	.	.	.
4	184421778	TSD=AGAAACCGCAAAAGCC;ASSESS=5;INTERNAL=NM_002199,INTRONIC;SVTYPE=LINE1;SVLEN=6019;MEINFO=L1Ta,0,6019,+;DIFF=0.09:n1-5572,a5642t,t6012g;LP=23;RP=12;RA=0.939;ISTP=0;PRIOR=false;SR=27;GENE=IRF2;AF=0.000399361;AC=2	0.000399361	.	.	.	.	.	.
4	188469153	TSD=TGGAGTTC;ASSESS=5;INTERNAL=LINC01060,INTRONIC;SVTYPE=LINE1;SVLEN=6019;MEINFO=L1Ta,0,6019,-;DIFF=0.08:n1-5655;LP=12;RP=6;RA=1;ISTP=0;PRIOR=false;SR=6;AF=0.000150105;AC=1	.	.	.	0.000150105	.	.	.
4	188970225	TSD=AAAATGCATTCTAG;ASSESS=5;INTERNAL=LINC01060,TERMINATOR;SVTYPE=LINE1;SVLEN=6011;MEINFO=L1Ambig,8,6019,+;DIFF=0.11:n1-7,i73g,c115a,c143t,g167a,t231c,t254a,c257t,n348-454,n502,n606-6019;LP=14;RP=18;RA=-0.363;ISTP=0;PRIOR=false;SR=20;AF=0.000150105;AC=1	.	.	.	0.000150105	.	.	.
5	37930	TSD=TTTTTTTTCT;ASSESS=5;INTERNAL=null,null;SVTYPE=LINE1;SVLEN=6018;MEINFO=L1Ta,1,6019,-;DIFF=0.11:n1-5564,n5599;LP=17;RP=18;RA=-0.082;ISTP=0;PRIOR=false;SR=20;GENE=LOC105374602;AF=0.000199681;AC=1	0.000199681	.	.	.	.	.	.
5	3906613	TSD=AAAGAGACAGATT;ASSESS=5;INTERNAL=null,null;SVTYPE=LINE1;SVLEN=6006;MEINFO=L1Ta1d,13,6019,+;DIFF=0.11:n1-13,c37a,c186a,t231c,t254a,c255t,n491-6019;LP=13;RP=11;RA=0.241;ISTP=0;PRIOR=false;SR=9	0.000199681	0.000716332	.	.	.	.	.
5	4001798	TSD=AGAGAATCACATTTCT;ASSESS=5;INTERNAL=null,null;SVTYPE=LINE1;SVLEN=6018;MEINFO=L1Ta,1,6019,-;DIFF=0.14:n1-5511,n5518,n5537-5538,n5549,n5552,n5560,n5566-5567,n5572,g5584t,c5585t,n5593;LP=37;RP=50;RA=-0.434;ISTP=0;PRIOR=false;SR=50	0.00219649	0.00286533	.	0.00615431	.	0.000869565	.
5	4509207	TSD=TCAAAACTTTTT;ASSESS=5;INTERNAL=null,null;SVTYPE=LINE1;SVLEN=6018;MEINFO=L1Ta,1,6019,-;DIFF=0.11:n1-5653,t5693a,c5950a;LP=10;RP=13;RA=-0.379;ISTP=0;PRIOR=false;SR=12;AF=0.000199681;AC=1	0.000199681	.	.	.	.	.	.
5	4693489	TSD=AGAAACTTCC;ASSESS=5;INTERNAL=null,null;SVTYPE=LINE1;SVLEN=6017;MEINFO=L1Ta1d,2,6019,+;DIFF=0.1:n1-4,t231c,t254a,n361,n435-6019;LP=19;RP=15;RA=0.341;ISTP=0;PRIOR=false;SR=8;AF=0.000199681;AC=1	0.000199681	.	.	.	.	.	.
5	8045613	TSD=CACAAACCAGGTTCTT;ASSESS=5;INTERNAL=null,null;SVTYPE=LINE1;SVLEN=6013;MEINFO=L1Ta1d,6,6019,-;DIFF=0.09:n1-9,t17c,c144g,t231c,t254a,n403-6019;LP=35;RP=36;RA=-0.041;ISTP=0;PRIOR=false;SR=36;AF=0.000599042;AC=3	0.000599042	.	.	.	.	.	.
5	8303460	TSD=null;ASSESS=3;INTERNAL=null,null;SVTYPE=LINE1;SVLEN=6017;MEINFO=L1Ta1d,1,6018,+;DIFF=0.05:a52t,t231c,t254a,c295t,n337,n358,c369t,n409-6019;LP=12;RP=2;RA=2.585;ISTP=0;PRIOR=false;SR=3	0.000199681	.	.	.	.	0.000869565	.
5	8303475	TSD=AAGAAGGCTGCAATC;ASSESS=5;INTERNAL=null,null;SVTYPE=LINE1;SVLEN=6017;MEINFO=L1Ta1d,1,6018,+;DIFF=0.11:a52t,t231c,t254a,c295t,c369t,n519-6019;LP=14;RP=9;RA=0.637;ISTP=0;PRIOR=false;SR=4	.	0.000716332	.	.	.	.	.
5	8677337	TSD=AATAAGGAAAATCTG;ASSESS=5;INTERNAL=null,null;SVTYPE=LINE1;SVLEN=6007;MEINFO=L1Ta1d,12,6019,+;DIFF=0.11:n1-12,t231c,t254a,n367-6019;LP=12;RP=12;RA=0;ISTP=0;PRIOR=false;SR=19;AF=0.000199681;AC=1	0.000199681	.	.	.	.	.	.
5	10887146	TSD=TAAAAGTGAGATTTGGG;ASSESS=5;INTERNAL=null,null;SVTYPE=LINE1;SVLEN=6018;MEINFO=L1Ambig,1,6019,+;DIFF=0.06:g38c,i73g,n322-6019;LP=36;RP=5;RA=2.848;ISTP=0;PRIOR=false;SR=26	0.00279553	.	0.000899281	0.000450315	0.00793651	0.00347826	.
5	11732588	TSD=AAGAATAAAGTAATAAA;ASSESS=5;INTERNAL=NR_109988,INTRONIC;SVTYPE=LINE1;SVLEN=6017;MEINFO=L1Ambig,2,6019,+;DIFF=0.11:n1-5530,a5931g;LP=46;RP=14;RA=1.716;ISTP=0;PRIOR=false;SR=28	0.000599042	0.00143266	.	0.000150105	.	.	.
5	11852477	TSD=AGAAAACTGGAGTA;ASSESS=5;INTERNAL=NR_109988,INTRONIC;SVTYPE=LINE1;SVLEN=6011;MEINFO=L1Ambig,8,6019,+;DIFF=0.12:n1-39,c63a,i73g,c171t,t231c,g232a,g244c,t254a,a341g,g352a,g417a,a423g,n433-493,a580g,n644-6019;LP=62;RP=42;RA=0.562;ISTP=-1;PRIOR=false;SR=25;GENE=CTNND2;AF=0.000599042;AC=3	0.000599042	.	.	0.00090063	.	.	.
5	13231794	TSD=TATATGCATAATTCTT;ASSESS=5;INTERNAL=null,null;SVTYPE=LINE1;SVLEN=6019;MEINFO=L1Ta1d,0,6019,-;DIFF=0.12:g64a,a158g,t231c,t254a,a423g,n493-494,n508,n511,n513,n518,n537,n539,n550,n571-572,n576-577,n592,n612,n616,n638-6019;LP=185;RP=181;RA=0.032;ISTP=0;PRIOR=false;SR=162	0.0165735	0.0121777	.	0.00495347	0.0238095	0.0113043	.
5	14078975	TSD=TAAATAAATATTATTTCT;ASSESS=5;INTERNAL=null,null;SVTYPE=LINE1;SVLEN=6007;MEINFO=L1Ta1d,12,6019,+;DIFF=0.12:n1-14,t231c,t254a,a423g,n580-6019;LP=33;RP=14;RA=1.237;ISTP=0;PRIOR=false;SR=20;AF=0.00119808;AC=6	0.00119808	.	.	.	.	.	.
5	14657943	TSD=GAAAATGTAAGTTACCA;ASSESS=5;INTERNAL=SNORD141B,PROMOTER;SVTYPE=LINE1;SVLEN=6019;MEINFO=L1Ta1d,0,6019,+;DIFF=0.1:g167a,t231c,t254a,c324a,n363-6019;LP=11;RP=10;RA=0.138;ISTP=0;PRIOR=false;SR=11;AF=0.000150105;AC=1	.	.	.	0.000150105	.	.	.
5	15528137	TSD=CCTCTTTCTGGTTTT;ASSESS=5;INTERNAL=NM_001278317,INTRONIC;SVTYPE=LINE1;SVLEN=6017;MEINFO=L1Ta1d,2,6019,-;DIFF=0.04:g167a,t231c,t254a,c324a,n333-6019;LP=2;RP=17;RA=-3.087;ISTP=0;PRIOR=false;SR=10	0.000199681	.	.	0.00225158	.	0.000869565	.
5	15576968	TSD=null;ASSESS=3;INTERNAL=NM_001278317,INTRONIC;SVTYPE=LINE1;SVLEN=6018;MEINFO=L1Ta1d,1,6019,-;DIFF=0.05:c144g,t231c,t254a,n350-6019;LP=1;RP=27;RA=-4.755;ISTP=-1;PRIOR=false;SR=12	.	.	.	.	.	0.00173913	.
5	15576979	TSD=AAAATTTTTTT;ASSESS=5;INTERNAL=NM_001278317,INTRONIC;SVTYPE=LINE1;SVLEN=6018;MEINFO=L1Ta1d,1,6019,-;DIFF=0.12:c144g,t231c,t254a,n538,n541-6019;LP=6;RP=19;RA=-1.663;ISTP=0;PRIOR=false;SR=18	0.000199681	0.000716332	.	0.00090063	.	.	.
5	16464200	TSD=GAAACTTAATCATC;ASSESS=5;INTERNAL=NM_033414,INTRONIC;SVTYPE=LINE1;SVLEN=6019;MEINFO=L1Ambig,0,6019,+;DIFF=0.12:n1-4,i73g,t189c,c205t,t231c,t254a,g352a,a423g,n460-6019;LP=172;RP=108;RA=0.671;ISTP=0;PRIOR=false;SR=143	0.00579073	0.00644699	.	0.00315221	0.031746	0.0173913	.
5	17851581	TSD=AAAAACCTGACCCTT;ASSESS=5;INTERNAL=null,null;SVTYPE=LINE1;SVLEN=6019;MEINFO=L1Ta,0,6019,+;DIFF=0.14:n1-5512;LP=19;RP=12;RA=0.663;ISTP=0;PRIOR=false;SR=18;GENE=LOC646241;AF=0.000399361;AC=2	0.000399361	.	.	.	.	.	.
5	18100285	TSD=AAGAATGTTCTCTC;ASSESS=5;INTERNAL=null,null;SVTYPE=LINE1;SVLEN=6019;MEINFO=L1Ta,0,6019,+;DIFF=0.14:n1-5314,n5465-5568,a5712g;LP=13;RP=14;RA=-0.107;ISTP=0;PRIOR=false;SR=14;AF=0.000199681;AC=1	0.000199681	.	.	.	.	.	.
5	18306744	TSD=AAAAAAAAACCAAAAA;ASSESS=5;INTERNAL=null,null;SVTYPE=LINE1;SVLEN=6019;MEINFO=L1Ta1d,0,6019,+;DIFF=0.08:c205g,t231c,g252t,t254a,g483a,n571-6019;LP=59;RP=1;RA=5.883;ISTP=0;PRIOR=false;SR=28	.	0.002149	.	.	.	.	.
5	18589217	TSD=AAGAATTTCAAAGGT;ASSESS=5;INTERNAL=null,null;SVTYPE=LINE1;SVLEN=6018;MEINFO=L1Ta1d,1,6019,+;DIFF=0.09:n1,t231c,t254a,n547,n618-6019;LP=22;RP=4;RA=2.459;ISTP=0;PRIOR=false;SR=9;AF=0.000199681;AC=1	0.000199681	.	.	.	.	.	.
5	21207623	TSD=AAAAATAACTTAAAATTCC;ASSESS=5;INTERNAL=null,null;SVTYPE=LINE1;SVLEN=6018;MEINFO=L1Ta1d,1,6019,+;DIFF=0.09:n1,c37a,t231c,g252c,t254a,g285a,c363t,n593-6019;LP=9631;RP=394;RA=4.611;ISTP=0;PRIOR=false;SR=9005	0.36901	0.345272	.	.	.	.	.
5	22353228	TSD=TAAAATTTTGTGAA;ASSESS=5;INTERNAL=NM_004061,INTRONIC;SVTYPE=LINE1;SVLEN=6019;MEINFO=L1Ta1d,0,6019,+;DIFF=0.15:n1-3,g210c,t231c,g252a,t254a,a388g,n622-6019;LP=21;RP=13;RA=0.692;ISTP=0;PRIOR=false;SR=16	0.000199681	0.000716332	.	.	.	.	.
5	22933767	TSD=null;ASSESS=3;INTERNAL=PRDM9,PROMOTER;SVTYPE=LINE1;SVLEN=6019;MEINFO=L1Ta1d,0,6019,-;DIFF=0.07:a52t,t231c,t254a,c369t,n378-6019;LP=5;RP=11;RA=-1.138;ISTP=-1;PRIOR=false;SR=8;AF=0.000150105;AC=1	.	.	.	0.000150105	.	.	.
5	27780996	TSD=null;ASSESS=4;INTERNAL=null,null;SVTYPE=LINE1;SVLEN=6019;MEINFO=L1Ta1d,0,6019,+;DIFF=0.07:t231c,t254a,t291c,n450-6019;LP=19;RP=1;RA=4.248;ISTP=-1;PRIOR=false;SR=8;GENE=LOC105374696;AF=0.000199681;AC=1	0.000199681	.	.	.	.	.	.
5	28255775	TSD=AAATGCAGAATCATT;ASSESS=5;INTERNAL=LINC02103,TERMINATOR;SVTYPE=LINE1;SVLEN=6018;MEINFO=L1Ta1d,1,6019,+;DIFF=0.08:n1,t231c,t254a,c276t,n278,n280,n300,n307-6019;LP=14;RP=9;RA=0.637;ISTP=0;PRIOR=false;SR=13;AF=0.000150105;AC=1	.	.	.	0.000150105	.	.	.
5	30903938	TSD=AAAAACCAACAGC;ASSESS=5;INTERNAL=null,null;SVTYPE=LINE1;SVLEN=6018;MEINFO=L1Ta,1,6019,+;DIFF=0.11:n1-5596,n5643,n5771,a5837c,c5945t;LP=11;RP=15;RA=-0.447;ISTP=0;PRIOR=false;SR=10;AF=0.000199681;AC=1	0.000199681	.	.	.	.	.	.
5	30982799	TSD=GTAAAATATTTATTT;ASSESS=5;INTERNAL=null,null;SVTYPE=LINE1;SVLEN=6018;MEINFO=L1Ta1d,1,6019,-;DIFF=0.11:t254a,n452-6019;LP=121;RP=218;RA=-0.849;ISTP=0;PRIOR=false;SR=190	0.00798722	0.00931232	.	0.0259682	0.00793651	0.0026087	.
5	31443674	TSD=null;ASSESS=3;INTERNAL=DROSHA,INTRONIC;SVTYPE=LINE1;SVLEN=6014;MEINFO=L1Ta,4,6018,+;DIFF=0.12:n1-5572,n5913;LP=8;RP=18;RA=-1.17;ISTP=0;PRIOR=false;SR=8;AF=0.000150105;AC=1	.	.	.	0.000150105	.	.	.
5	31664904	TSD=AGGTGCATCTACTTCT;ASSESS=5;INTERNAL=PDZD2,INTRONIC;SVTYPE=LINE1;SVLEN=6018;MEINFO=L1Ta1d,1,6019,-;DIFF=0.12:n11,t231c,t254a,c324a,n425-6019;LP=8;RP=16;RA=-1;ISTP=0;PRIOR=false;SR=13;AF=0.000150105;AC=1	.	.	.	0.000150105	.	.	.
5	33617581	TSD=AAAACCACTAATGT;ASSESS=5;INTERNAL=ADAMTS12,INTRONIC;SVTYPE=LINE1;SVLEN=6019;MEINFO=L1Ta,0,6019,+;DIFF=0.11:n1-5622,c5672a,t5707a,c5950a;LP=19;RP=28;RA=-0.559;ISTP=0;PRIOR=false;SR=26;AF=0.000150105;AC=1	.	.	.	0.000150105	.	.	.
5	33682537	TSD=TACATATTAAGTCTT;ASSESS=5;INTERNAL=ADAMTS12,INTRONIC;SVTYPE=LINE1;SVLEN=6012;MEINFO=L1Ta1d,7,6019,-;DIFF=0.12:n1-7,t231c,t254a,n318,c327t,n543-6019;LP=12;RP=35;RA=-1.544;ISTP=0;PRIOR=false;SR=29;AF=0.00030021;AC=2	.	.	.	0.00030021	.	.	.
5	33797452	TSD=AAAATAAAACTCTT;ASSESS=5;INTERNAL=NM_030955,INTRONIC;SVTYPE=LINE1;SVLEN=6019;MEINFO=L1Ta1d,0,6019,-;DIFF=0.1:n370-6019;LP=1312;RP=2015;RA=-0.619;ISTP=0;PRIOR=false;SR=1405	0.0832668	0.0752149	0.202338	0.0890123	0.119048	0.137391	.
5	33972365	TSD=AGAAAAAAATACATATTG;ASSESS=5;INTERNAL=SLC45A2,INTRONIC;SVTYPE=LINE1;SVLEN=6019;MEINFO=L1Ta1d,0,6019,+;DIFF=0.08:n408-6019;LP=45;RP=58;RA=-0.366;ISTP=0;PRIOR=false;SR=79;AF=0.00060042;AC=4	.	.	.	0.00060042	.	.	.
5	34456237	TSD=GGTTGCATTCTTTT;ASSESS=5;INTERNAL=RAI14,PROMOTER;SVTYPE=LINE1;SVLEN=6019;MEINFO=L1Ta1d,0,6019,-;DIFF=0.07:n1-2,t231c,t254a,n293-6019;LP=8;RP=13;RA=-0.7;ISTP=0;PRIOR=false;SR=9;AF=0.000150105;AC=1	.	.	.	0.000150105	.	.	.
5	34825008	TSD=AAAAACACATCTG;ASSESS=5;INTERNAL=NM_001145523,INTRONIC;SVTYPE=LINE1;SVLEN=6019;MEINFO=L1Ta1d,0,6019,+;DIFF=0.06:t231c,t254a,n411,n418-523,n640,n674-6019;LP=21;RP=1;RA=4.392;ISTP=0;PRIOR=false;SR=3	.	0.000716332	.	.	.	.	.
5	35815039	TSD=TCATAATTATTTCTT;ASSESS=5;INTERNAL=NM_024867,TERMINATOR;SVTYPE=LINE1;SVLEN=6019;MEINFO=L1Ta1d,0,6019,-;DIFF=0.1:n1-2,t231c,t254a,c327t,n422-6019;LP=10;RP=13;RA=-0.379;ISTP=0;PRIOR=false;SR=3;GENE=LOC105374724;AF=0.000199681;AC=1	0.000199681	.	.	.	.	.	.
5	36268465	TSD=dTTTGTGGTCACCATATGT;ASSESS=5;INTERNAL=RANBP3L,INTRONIC;SVTYPE=LINE1;SVLEN=6017;MEINFO=L1Ta1d,1,6018,+;DIFF=0.08:t231c,c260a,g262a,c280a,c283a,c295a,n437-6019;LP=33;RP=15;RA=1.138;ISTP=0;PRIOR=false;SR=8;AF=0.00030021;AC=2	.	.	.	0.00030021	.	.	.
5	36276474	TSD=GAAAATTAAATTTT;ASSESS=5;INTERNAL=NM_145000,INTRONIC;SVTYPE=LINE1;SVLEN=6018;MEINFO=L1Ta1d,1,6019,+;DIFF=0.1:n1,t82c,t231c,t254a,c255t,n472,c482a,g492a,n514-6019;LP=19;RP=4;RA=2.248;ISTP=0;PRIOR=false;SR=14;GENE=RANBP3L;AF=0.000199681;AC=1	0.000199681	.	.	.	.	.	.
5	38599750	TSD=AAGAATTTAATTAACA;ASSESS=5;INTERNAL=NR_103554,INTRONIC;SVTYPE=LINE1;SVLEN=6019;MEINFO=L1Ta1d,0,6019,+;DIFF=0.11:a52t,t254a,c369t,n499-544,n675-678,n699-6019;LP=54;RP=16;RA=1.755;ISTP=0;PRIOR=false;SR=51	0.00139776	0.002149	.	.	.	.	.
5	40041243	TSD=CGATATTCTT;ASSESS=5;INTERNAL=null,null;SVTYPE=LINE1;SVLEN=6015;MEINFO=L1Ta1d,4,6019,-;DIFF=0.11:n1-4,t231c,t254a,n471,n474,n492,n511-564,n571-572,n587,n592,n612,n616,g617a,n650-650,n675-678,n719-6019;LP=1305;RP=2463;RA=-0.916;ISTP=0;PRIOR=false;SR=1885	0.0836661	0.0888252	0.00629496	0.159712	0.0555556	0.0547826	.
5	40486045	TSD=AAAAATTCAGGTTA;ASSESS=5;INTERNAL=null,null;SVTYPE=LINE1;SVLEN=6015;MEINFO=L1Ta1d,4,6019,+;DIFF=0.1:n1-4,t231c,t254a,c324a,n361-6019;LP=9;RP=7;RA=0.363;ISTP=0;PRIOR=false;SR=9;AF=0.000199681;AC=1	0.000199681	.	.	.	.	.	.
5	41052302	TSD=CAAAATCAGTTATTT;ASSESS=5;INTERNAL=MROH2B,INTRONIC;SVTYPE=LINE1;SVLEN=6018;MEINFO=L1Ta1d,1,6019,-;DIFF=0.04:n210,t231c,n236-6019;LP=1;RP=7;RA=-2.807;ISTP=0;PRIOR=false;SR=8;AF=0.000150105;AC=1	.	.	.	0.000150105	.	.	.
5	41055193	TSD=AAAAAACTATAC;ASSESS=5;INTERNAL=MROH2B,INTRONIC;SVTYPE=LINE1;SVLEN=6007;MEINFO=L1Ta,12,6019,+;DIFF=0.05:n1-5808,g5834a,n5846-5847,n5854,c5857t,n5859,g5861t,n5864-5865,t5877g,n5878,g5879t,n5883-5883,c6003t;LP=10;RP=7;RA=0.515;ISTP=0;PRIOR=false;SR=5;AF=0.000150105;AC=1	.	.	.	0.000150105	.	.	.
5	41094203	TSD=AATACATCACTCTT;ASSESS=5;INTERNAL=MROH2B,PROMOTER;SVTYPE=LINE1;SVLEN=6019;MEINFO=L1Ta1d,0,6019,-;DIFF=0.08:c11t,g210c,t231c,t254a,n369-6019;LP=7;RP=14;RA=-1;ISTP=0;PRIOR=false;SR=17;AF=0.000150105;AC=1	.	.	.	0.000150105	.	.	.
5	41872156	TSD=CACTGTACTGTATTTTT;ASSESS=5;INTERNAL=OXCT1-AS1,5_UTR;SVTYPE=LINE1;SVLEN=6018;MEINFO=L1Ta1d,1,6019,-;DIFF=0.08:n1,g15a,t231c,t254a,n395-6019;LP=9;RP=38;RA=-2.078;ISTP=0;PRIOR=false;SR=16;AF=0.00030021;AC=2	.	.	.	0.00030021	.	.	.
5	42631937	TSD=GAAATATAACCTCTAGG;ASSESS=5;INTERNAL=NM_001242460,INTRONIC;SVTYPE=LINE1;SVLEN=6018;MEINFO=L1Ta1d,1,6019,+;DIFF=0.12:c144g,t231c,t254a,n491-6019;LP=21;RP=15;RA=0.485;ISTP=0;PRIOR=false;SR=16	0.000199681	0.000716332	.	.	.	.	.
5	42903384	TSD=AAAAACACACTC;ASSESS=5;INTERNAL=null,null;SVTYPE=LINE1;SVLEN=6018;MEINFO=L1Ta1d,1,6019,+;DIFF=0.12:n1,t231c,t254a,c327t,c445t,n518,n537,n629-6019;LP=16;RP=10;RA=0.678;ISTP=0;PRIOR=false;SR=11	0.000399361	0.000716332	.	.	.	.	.
5	43864486	TSD=AAAATTTCATAGATGTC;ASSESS=5;INTERNAL=NNT,TERMINATOR;SVTYPE=LINE1;SVLEN=6019;MEINFO=L1Ta1d,0,6019,+;DIFF=0.08:c144g,t231c,t254a,n377-6019;LP=19;RP=4;RA=2.248;ISTP=0;PRIOR=false;SR=12;AF=0.000150105;AC=1	.	.	.	0.000150105	.	.	.
5	50758513	TSD=TAAAAATTGTG;ASSESS=5;INTERNAL=PARP8,INTRONIC;SVTYPE=LINE1;SVLEN=6019;MEINFO=L1Ta1d,0,6019,+;DIFF=0.1:n1-2,t231c,t254a,c327t,n423-6019;LP=45;RP=23;RA=0.968;ISTP=0;PRIOR=false;SR=38;AF=0.000450315;AC=3	.	.	.	0.000450315	.	.	.
5	51095497	TSD=null;ASSESS=3;INTERNAL=null,null;SVTYPE=LINE1;SVLEN=6010;MEINFO=L1Ta1d,8,6018,+;DIFF=0.11:n1-7,t231c,t254a,c327t,n418-438,n589-6019;LP=20;RP=12;RA=0.737;ISTP=0;PRIOR=false;SR=4	0.000199681	0.000716332	.	.	.	.	.
5	51095512	TSD=AAAAATATGTGGTTA;ASSESS=5;INTERNAL=LINC02106,PROMOTER;SVTYPE=LINE1;SVLEN=6010;MEINFO=L1Ta1d,8,6018,+;DIFF=0.08:n1-7,t231c,t254a,n302-6019;LP=24;RP=16;RA=0.585;ISTP=0;PRIOR=false;SR=12;AF=0.00030021;AC=2	.	.	.	0.00030021	.	.	.
5	51613264	TSD=AAAATCAACTGTATATA;ASSESS=5;INTERNAL=ISL1,TERMINATOR;SVTYPE=LINE1;SVLEN=6018;MEINFO=L1Ta1d,1,6019,+;DIFF=0.09:n1,a52t,t231c,t254a,n356-6019;LP=48;RP=34;RA=0.497;ISTP=0;PRIOR=false;SR=43;AF=0.000450315;AC=3	.	.	.	0.000450315	.	.	.
5	51980613	TSD=CAGATCTTTTGTGTCTT;ASSESS=5;INTERNAL=null,null;SVTYPE=LINE1;SVLEN=6016;MEINFO=L1Ta1d,3,6019,-;DIFF=0.1:n1,t231c,t254a,n367-6019;LP=15;RP=15;RA=0;ISTP=0;PRIOR=false;SR=24;AF=0.000199681;AC=1	0.000199681	.	.	.	.	.	.
5	52836139	TSD=AGAAAGTCAGTAAGTGT;ASSESS=5;INTERNAL=NM_181501,INTRONIC;SVTYPE=LINE1;SVLEN=6019;MEINFO=L1Ta1d,0,6019,+;DIFF=0.11:n1-2,t231c,t254a,n479-6019;LP=48;RP=24;RA=1;ISTP=0;PRIOR=false;SR=27	0.000798722	0.00143266	.	.	.	.	.
5	52854981	TSD=AAAAAGCAAGATCTA;ASSESS=5;INTERNAL=NM_181501,INTRONIC;SVTYPE=LINE1;SVLEN=6016;MEINFO=L1Ambig,3,6019,+;DIFF=0.09:n1-3,i73g,c115a,c143t,g167a,t231c,t254a,c257t,g352a,n432-6019;LP=17;RP=5;RA=1.766;ISTP=0;PRIOR=false;SR=9;GENE=ITGA1;AF=0.000199681;AC=1	0.000199681	.	.	.	.	.	.
5	53045535	TSD=CTCACTTTC;ASSESS=5;INTERNAL=ITGA2,INTRONIC;SVTYPE=LINE1;SVLEN=6018;MEINFO=L1Ta1d,1,6019,-;DIFF=0.09:g167a,t231c,t254a,c324a,n334-573,a576c,n579,a580g,n581-581,t587a,c591g,n598,n600,n602,g605a,c609a,n617,g621t,c634t,g652a,n671-674,n685,c702a,t708c,n711-6019;LP=15;RP=17;RA=-0.181;ISTP=0;PRIOR=false;SR=18;AF=0.000150105;AC=1	.	.	.	0.000150105	.	.	.
5	53437246	TSD=AAGAAAAGAAACA;ASSESS=5;INTERNAL=null,null;SVTYPE=LINE1;SVLEN=6013;MEINFO=L1Ta1d,6,6019,+;DIFF=0.05:n1-5,t231c,t254a,n295-6019;LP=13;RP=1;RA=3.7;ISTP=0;PRIOR=false;SR=13	0.000399361	.	.	0.00195137	.	0.000869565	.
5	53439516	TSD=AAGAAAGGTATGAGCTC;ASSESS=5;INTERNAL=null,null;SVTYPE=LINE1;SVLEN=6019;MEINFO=L1Ta1d,0,6019,+;DIFF=0.1:n1-2,t231c,t254a,c327t,n453-6019;LP=21;RP=8;RA=1.392;ISTP=0;PRIOR=false;SR=14;AF=0.000199681;AC=1	0.000199681	.	.	.	.	.	.
5	53444515	TSD=GAAAACATCAAGG;ASSESS=5;INTERNAL=null,null;SVTYPE=LINE1;SVLEN=6017;MEINFO=L1Ta1d,2,6019,+;DIFF=0.09:t231c,t254a,n354-6019;LP=10;RP=4;RA=1.322;ISTP=0;PRIOR=false;SR=6;AF=0.000199681;AC=1	0.000199681	.	.	0.00030021	.	.	.
5	53488729	TSD=TCAATCATTCCTCTT;ASSESS=5;INTERNAL=NM_006350,TERMINATOR;SVTYPE=LINE1;SVLEN=6016;MEINFO=L1Ta,3,6019,-;DIFF=0.12:n1-5530,c5950a;LP=23;RP=16;RA=0.524;ISTP=0;PRIOR=false;SR=25	0.000399361	0.000716332	.	0.000450315	.	.	.
5	54236016	TSD=AAGAAATTTGA;ASSESS=5;INTERNAL=NM_019087,INTRONIC;SVTYPE=LINE1;SVLEN=6019;MEINFO=L1Ta1d,0,6019,+;DIFF=0.09:t231c,t254a,n309,n314,n316,n326,n335,n568,n576,n582,n612,n652-6019;LP=23;RP=4;RA=2.524;ISTP=0;PRIOR=false;SR=11;GENE=ARL15;AF=0.000199681;AC=1	0.000199681	.	.	.	.	.	.
5	54703486	TSD=dCTAAAC;ASSESS=5;INTERNAL=NR_104658,INTRONIC;SVTYPE=LINE1;SVLEN=6017;MEINFO=L1Ta,1,6018,-;DIFF=0.09:n1-5611,a5650g,c5748g,n5762-5775;LP=44;RP=50;RA=-0.184;ISTP=0;PRIOR=false;SR=33;GENE=LOC102467080;AF=0.000798722;AC=4	0.000798722	.	.	.	.	.	.
5	54939696	TSD=AGGAGCTATTACTATT;ASSESS=5;INTERNAL=null,null;SVTYPE=LINE1;SVLEN=6007;MEINFO=L1Ta1d,12,6019,-;DIFF=0.11:n1-12,g53a,c90t,t231c,t254a,n287,n317,n321-337,n387,n491-6019;LP=7;RP=11;RA=-0.652;ISTP=0;PRIOR=false;SR=9;AF=0.000199681;AC=1	0.000199681	.	.	.	.	.	.
5	55426927	TSD=AGAAGTGTATTCTTTC;ASSESS=5;INTERNAL=PLPP1,INTRONIC;SVTYPE=LINE1;SVLEN=6019;MEINFO=L1Ta1d,0,6019,-;DIFF=0.11:n11-12,t231c,t254a,c324a,n434-6019;LP=9;RP=16;RA=-0.83;ISTP=0;PRIOR=false;SR=14;AF=0.000150105;AC=1	.	.	.	0.000150105	.	.	.
5	56378831	TSD=AAAGAACATATTCAAGT;ASSESS=5;INTERNAL=LINC01948,TERMINATOR;SVTYPE=LINE1;SVLEN=6019;MEINFO=L1Ta,0,6019,+;DIFF=0.09:n1-5542,n5567-5568,n5584-5587,n5604,n5607,n5629,n5643,n5645,n5651,c5672a;LP=313;RP=231;RA=0.438;ISTP=0;PRIOR=false;SR=231;AF=0.0148604;AC=99	.	.	.	0.0148604	.	.	.
5	56389149	TSD=null;ASSESS=3;INTERNAL=null,null;SVTYPE=LINE1;SVLEN=6016;MEINFO=L1Ta1d,3,6019,+;DIFF=0.05:n1-3,t231c,t254a,n361,n363-6019;LP=12;RP=1;RA=3.585;ISTP=0;PRIOR=false;SR=9;AF=0.0189696;AC=95	0.0189696	.	.	.	.	.	.
5	57615920	TSD=AAATTTGCCAAAGTA;ASSESS=5;INTERNAL=LINCR-0003,INTRONIC;SVTYPE=LINE1;SVLEN=6018;MEINFO=L1Ta1d,1,6019,+;DIFF=0.09:n1,t231c,t254a,n359-6019;LP=49;RP=16;RA=1.615;ISTP=0;PRIOR=false;SR=25;AF=0.000450315;AC=3	.	.	.	0.000450315	.	.	.
5	59197151	TSD=CTCCTAATTTTTT;ASSESS=5;INTERNAL=NM_001165899,INTRONIC;SVTYPE=LINE1;SVLEN=6016;MEINFO=L1Ambig,3,6019,-;DIFF=0.12:n1-3,i73g,c115a,g167a,t231c,t254a,c257t,g352a,n380-390,n541-6019;LP=12;RP=18;RA=-0.585;ISTP=0;PRIOR=false;SR=10	0.000798722	0.000716332	.	0.002852	.	0.000869565	.
5	60218695	TSD=null;ASSESS=3;INTERNAL=NM_001165899,INTRONIC;SVTYPE=LINE1;SVLEN=6016;MEINFO=L1Ta,2,6018,+;DIFF=0.09:n1-5577,n5581,n5591-5593,n5600,n5604,n5613,n5615,n5621-5622,n5628,n5630,n5634,n5638,n5647,n5649-5650,n5660-5661,n5680-5681,n5732,n5739,n5795,n5799,t5808a,n5809,n5815,g5823c,n5834,a5837c,c5945t;LP=15;RP=12;RA=0.322;ISTP=0;PRIOR=false;SR=6;GENE=PDE4D;AF=0.000199681;AC=1	0.000199681	.	.	.	.	.	.
5	60465248	TSD=null;ASSESS=4;INTERNAL=PDE4D,INTRONIC;SVTYPE=LINE1;SVLEN=6015;MEINFO=L1Ta1d,3,6018,+;DIFF=0.09:n1-2,t231c,t254a,g321a,n384-6019;LP=10;RP=19;RA=-0.926;ISTP=-1;PRIOR=false;SR=7;AF=0.000150105;AC=1	.	.	.	0.000150105	.	.	.
5	61927463	TSD=CAACAGTAATCTTTCTT;ASSESS=5;INTERNAL=null,null;SVTYPE=LINE1;SVLEN=6017;MEINFO=L1Ta1d,2,6019,-;DIFF=0.08:g61c,t231c,t254a,n377-6019;LP=11;RP=9;RA=0.29;ISTP=0;PRIOR=false;SR=15;GENE=LOC105378998;AF=0.000199681;AC=1	0.000199681	.	.	.	.	.	.
5	62076450	TSD=CGACTCCTTAATTTC;ASSESS=5;INTERNAL=null,null;SVTYPE=LINE1;SVLEN=6017;MEINFO=L1Ta1d,2,6019,-;DIFF=0.1:n488-6019;LP=10;RP=16;RA=-0.678;ISTP=0;PRIOR=false;SR=12;GENE=LOC105378998;AF=0.000199681;AC=1	0.000199681	.	.	.	.	.	.
5	62550441	TSD=TACCCTATGTTTTC;ASSESS=5;INTERNAL=NM_001134779,EXON_25;SVTYPE=LINE1;SVLEN=6017;MEINFO=L1Ta1d,2,6019,-;DIFF=0.05:n1-2,t231c,t254a,n327,n346-6019;LP=1;RP=10;RA=-3.322;ISTP=0;PRIOR=false;SR=7	.	.	.	.	.	0.000869565	.
5	63195834	TSD=GAAATGTGGGCACCTTG;ASSESS=5;INTERNAL=null,null;SVTYPE=LINE1;SVLEN=6017;MEINFO=L1Ta1d,2,6019,+;DIFF=0.1:n1,t231c,t254a,a423g,n441-466,n475,g523a,n568,n617-6019;LP=13;RP=6;RA=1.115;ISTP=0;PRIOR=false;SR=10	0.00139776	0.00143266	.	0.00270189	.	.	.
5	63698156	TSD=TAAACAGTTTTTTT;ASSESS=5;INTERNAL=null,null;SVTYPE=LINE1;SVLEN=6014;MEINFO=L1Ta1d,5,6019,-;DIFF=0.05:n1-4,t231c,t254a,n396-6019;LP=1;RP=16;RA=-4;ISTP=0;PRIOR=false;SR=9;AF=0.000199681;AC=1	0.000199681	.	.	.	.	.	.
5	63885606	TSD=AAAAGATGGAATGTA;ASSESS=5;INTERNAL=null,null;SVTYPE=LINE1;SVLEN=6017;MEINFO=L1Ta1d,2,6019,+;DIFF=0.05:n1-2,t231c,t254a,n286,n301-6019;LP=18;RP=4;RA=2.17;ISTP=0;PRIOR=false;SR=16	.	.	.	.	.	0.000869565	.
5	64972283	TSD=AAGTAATTCCTG;ASSESS=5;INTERNAL=NM_001297644,INTRONIC;SVTYPE=LINE1;SVLEN=6018;MEINFO=L1Ambig,1,6019,+;DIFF=0.09:n1-3,i73g,c115a,c143t,g167a,t231c,t254a,c257t,n322-6019;LP=10;RP=8;RA=0.322;ISTP=0;PRIOR=false;SR=7;GENE=CWC27;AF=0.000199681;AC=1	0.000199681	.	.	.	.	.	.
5	65430178	TSD=AAAAAAAAAAAAAG;ASSESS=5;INTERNAL=ADAMTS6,INTRONIC;SVTYPE=LINE1;SVLEN=6019;MEINFO=L1Ta,0,6019,+;DIFF=0.1:n1-5709;LP=17;RP=25;RA=-0.556;ISTP=0;PRIOR=false;SR=26;AF=0.000450315;AC=3	.	.	.	0.000450315	.	.	.
5	68992660	TSD=AAGACTGAAGGTA;ASSESS=5;INTERNAL=NR_130778,INTRONIC;SVTYPE=LINE1;SVLEN=6019;MEINFO=L1Ambig,0,6019,+;DIFF=0.09:n1-3,g61a,i73g,t231c,t254a,g352a,n394-6019;LP=20;RP=18;RA=0.152;ISTP=0;PRIOR=false;SR=17	0.000199681	0.000716332	.	.	.	.	.
5	71804955	TSD=CCTGAAGATTCTT;ASSESS=5;INTERNAL=null,null;SVTYPE=LINE1;SVLEN=6017;MEINFO=L1Ambig,2,6019,-;DIFF=0.12:n1-5578,g5586a,g5823t,n5849,n5865,n5869,n5877,n5887,n5905-5932;LP=25;RP=32;RA=-0.356;ISTP=0;PRIOR=false;SR=24	0.00119808	0.00143266	.	0.00195137	0.00793651	.	.
5	71915304	TSD=TCTAGATGAAGAT;ASSESS=5;INTERNAL=MAP1B,PROMOTER;SVTYPE=LINE1;SVLEN=6016;MEINFO=L1Ambig,2,6018,+;DIFF=0.08:n1,i73g,g142t,t231c,t254a,c282t,n352-6019;LP=5;RP=11;RA=-1.138;ISTP=0;PRIOR=false;SR=12;AF=0.000150105;AC=1	.	.	.	0.000150105	.	.	.
5	73148848	TSD=AAAAATTACACAAAAA;ASSESS=5;INTERNAL=LOC105379030,INTRONIC;SVTYPE=LINE1;SVLEN=6019;MEINFO=L1Ta,0,6019,+;DIFF=0.1:n1-5744,n5770,n6019;LP=27;RP=17;RA=0.667;ISTP=0;PRIOR=false;SR=23;AF=0.00030021;AC=2	.	.	.	0.00030021	.	.	.
5	73947313	TSD=CCAGTGCTTATTTTT;ASSESS=5;INTERNAL=NM_001244364,TERMINATOR;SVTYPE=LINE1;SVLEN=6018;MEINFO=L1Ta1d,1,6019,-;DIFF=0.04:n1,t231c,n252-6019;LP=1;RP=16;RA=-4;ISTP=0;PRIOR=false;SR=12	.	.	.	.	.	0.000869565	.
5	74156364	TSD=AAAAATAAAAAAA;ASSESS=5;INTERNAL=null,null;SVTYPE=LINE1;SVLEN=6009;MEINFO=L1Ta1d,10,6019,+;DIFF=0.1:n1-12,t231c,t254a,n411,n466-6019;LP=14;RP=8;RA=0.807;ISTP=0;PRIOR=false;SR=5;AF=0.000199681;AC=1	0.000199681	.	.	.	.	.	.
5	74241903	TSD=AAATGCAAATGC;ASSESS=5;INTERNAL=null,null;SVTYPE=LINE1;SVLEN=6018;MEINFO=L1Ta1d,1,6019,+;DIFF=0.14:n1-7,c37t,g61a,t231c,t254a,n375,n395-426,g483a,n577-6019;LP=17;RP=11;RA=0.628;ISTP=0;PRIOR=false;SR=9	0.000199681	0.000716332	.	.	.	.	.
5	75205941	TSD=AAAAATCTTATGAACA;ASSESS=5;INTERNAL=ANKRD31,INTRONIC;SVTYPE=LINE1;SVLEN=6015;MEINFO=L1Ta1d,4,6019,+;DIFF=0.12:n1-4,c144g,t231c,t254a,n498-6019;LP=18;RP=9;RA=1;ISTP=0;PRIOR=false;SR=11;AF=0.000150105;AC=1	.	.	.	0.000150105	.	.	.
5	75598309	TSD=GATTTTTTTATTATTTTT;ASSESS=5;INTERNAL=NM_016218,3_UTR;SVTYPE=LINE1;SVLEN=6018;MEINFO=L1Ta1d,1,6019,-;DIFF=0.05:g210c,t231c,g232c,t254a,n324-6019;LP=1;RP=22;RA=-4.459;ISTP=0;PRIOR=false;SR=9;GENE=POLK	.	.	.	0.00030021	0.00793651	.	.
5	77130630	TSD=AGAAAGGTATATGA;ASSESS=5;INTERNAL=NR_024398,INTRONIC;SVTYPE=LINE1;SVLEN=6019;MEINFO=L1Ta1d,0,6019,+;DIFF=0.11:t231c,t254a,c327t,n380-428,n579-6019;LP=90;RP=78;RA=0.206;ISTP=0;PRIOR=false;SR=76	0.00319489	0.00358166	.	0.00390273	.	.	.
5	78750867	TSD=TATTT;ASSESS=5;INTERNAL=null,null;SVTYPE=LINE1;SVLEN=6019;MEINFO=L1Ta,0,6019,-;DIFF=0.1:n1-5289,n5440-5610,n5643,n5664,c5788t,n5988;LP=189;RP=271;RA=-0.52;ISTP=0;PRIOR=false;SR=130;GENE=LOC107986425;AF=0.00319489;AC=16	0.00319489	.	.	.	.	.	.
5	78750885	TSD=TATTTATTTATTTTTATTTTTTT;ASSESS=5;INTERNAL=null,null;SVTYPE=LINE1;SVLEN=6019;MEINFO=L1Ta1d,0,6019,-;DIFF=0.12:n1-2,t231c,t254a,c327t,n427,n460,n489-6019;LP=65;RP=138;RA=-1.086;ISTP=0;PRIOR=false;SR=57	.	0.00501433	.	.	.	.	.
5	78972623	TSD=AAAAACTTC;ASSESS=5;INTERNAL=ARSB,INTRONIC;SVTYPE=LINE1;SVLEN=6019;MEINFO=L1Ta,0,6019,+;DIFF=0.1:n1-5677;LP=26;RP=28;RA=-0.107;ISTP=0;PRIOR=false;SR=19;AF=0.00030021;AC=2	.	.	.	0.00030021	.	.	.
5	80556590	TSD=CCAAAAAACATTTTT;ASSESS=5;INTERNAL=NM_001004441,TERMINATOR;SVTYPE=LINE1;SVLEN=6018;MEINFO=L1Ta1d,1,6019,-;DIFF=0.12:n17,c197t,t231c,g252a,t254a,a388g,a423g,n433-444,n472,n476,n595-6019;LP=32;RP=32;RA=0;ISTP=0;PRIOR=false;SR=26;AF=0.000399361;AC=2	0.000399361	.	.	0.002852	.	.	.
5	81657879	TSD=AAAATTTTG;ASSESS=5;INTERNAL=NM_001256733,INTRONIC;SVTYPE=LINE1;SVLEN=6018;MEINFO=L1Ta1d,1,6019,+;DIFF=0.1:t231c,t254a,n400,a423g,n492-6019;LP=15;RP=14;RA=0.1;ISTP=0;PRIOR=false;SR=18;GENE=SSBP2;AF=0.000199681;AC=1	0.000199681	.	.	.	.	.	.
5	82111681	TSD=CTGAATAATTACATTTTT;ASSESS=5;INTERNAL=ATG10,INTRONIC;SVTYPE=LINE1;SVLEN=6016;MEINFO=L1Ta1d,3,6019,-;DIFF=0.11:n1,c160a,n377-6019;LP=21;RP=13;RA=0.692;ISTP=0;PRIOR=false;SR=18;AF=0.000150105;AC=1	.	.	.	0.000150105	.	.	.
5	82174796	TSD=AAAAACATGTAGTCC;ASSESS=5;INTERNAL=NM_031482,INTRONIC;SVTYPE=LINE1;SVLEN=6019;MEINFO=L1Ta1d,0,6019,+;DIFF=0.11:n1-14,c144g,t231c,t254a,n400,n403,n406,n409,n411,n417,n431,n447,n454,n459,n465,n471,n475,n483,n493,n497,n505,n509,n533-6019;LP=10;RP=16;RA=-0.678;ISTP=0;PRIOR=false;SR=15;GENE=ATG10;AF=0.000199681;AC=1	0.000199681	.	.	.	.	.	.
5	82662294	TSD=AAGAATTAGACACCT;ASSESS=5;INTERNAL=MIR3977,PROMOTER;SVTYPE=LINE1;SVLEN=6019;MEINFO=L1Ta,0,6019,+;DIFF=0.1:n1-5586,n5603,n5701,n5715,c5878a;LP=32;RP=35;RA=-0.129;ISTP=0;PRIOR=false;SR=55;AF=0.00060042;AC=4	.	.	.	0.00060042	.	.	.
5	83564303	TSD=AAGAATGGATA;ASSESS=5;INTERNAL=NM_001164097,INTRONIC;SVTYPE=LINE1;SVLEN=6016;MEINFO=L1Ta1d,3,6019,+;DIFF=0.1:n1-3,g318a,n466-6019;LP=25;RP=9;RA=1.474;ISTP=0;PRIOR=false;SR=13;GENE=VCAN;AF=0.000199681;AC=1	0.000199681	.	.	.	.	.	.
5	83623182	TSD=CCGCCTCTACT;ASSESS=5;INTERNAL=null,null;SVTYPE=LINE1;SVLEN=6011;MEINFO=L1Ta1d,8,6019,-;DIFF=0.11:n1-6,n434-6019;LP=9;RP=19;RA=-1.078;ISTP=0;PRIOR=false;SR=18	0.000199681	0.000716332	.	.	.	.	.
5	84203824	TSD=AAGAGAAAACATT;ASSESS=5;INTERNAL=EDIL3,INTRONIC;SVTYPE=LINE1;SVLEN=6019;MEINFO=L1Ta1d,0,6019,+;DIFF=0.13:n10,n465-6019;LP=11;RP=10;RA=0.138;ISTP=0;PRIOR=false;SR=17;AF=0.000150105;AC=1	.	.	.	0.000150105	.	.	.
5	85131243	TSD=C;ASSESS=5;INTERNAL=null,null;SVTYPE=LINE1;SVLEN=6017;MEINFO=L1Ta1d,1,6018,+;DIFF=0.12:t151a,t231c,t254a,c324a,c529a,n558-6019;LP=14;RP=20;RA=-0.515;ISTP=0;PRIOR=false;SR=22;AF=0.000199681;AC=1	0.000199681	.	.	.	.	.	.
5	86508206	TSD=GGTATTGTACATTTCTT;ASSESS=5;INTERNAL=null,null;SVTYPE=LINE1;SVLEN=6017;MEINFO=L1Ta1d,2,6019,-;DIFF=0.1:n1-2,t231c,t254a,n381-6019;LP=9;RP=18;RA=-1;ISTP=0;PRIOR=false;SR=15;AF=0.000199681;AC=1	0.000199681	.	.	.	.	.	.
5	87568141	TSD=AATTCTCAATTTTCTTTT;ASSESS=5;INTERNAL=CCNH,PROMOTER;SVTYPE=LINE1;SVLEN=6019;MEINFO=L1Ta1d,0,6019,-;DIFF=0.11:n1-15,t231c,t254a,c327t,n421-6019;LP=11;RP=8;RA=0.459;ISTP=0;PRIOR=false;SR=12;AF=0.000150105;AC=1	.	.	.	0.000150105	.	.	.
5	87964672	TSD=null;ASSESS=4;INTERNAL=null,null;SVTYPE=LINE1;SVLEN=6016;MEINFO=L1Ta1d,2,6018,-;DIFF=0.1:n1,t231c,t254a,n294,n419-6019;LP=16;RP=13;RA=0.3;ISTP=0;PRIOR=false;SR=8;AF=0.000199681;AC=1	0.000199681	.	.	.	.	.	.
5	88552695	TSD=null;ASSESS=3;INTERNAL=LINC00461,INTRONIC;SVTYPE=LINE1;SVLEN=6012;MEINFO=L1Ta1d,7,6019,-;DIFF=0.04:n1-31,n36,c37t,g61a,t231c,t254a,n313-6019;LP=1;RP=4;RA=-2;ISTP=-1;PRIOR=false;SR=1;AF=0.000150105;AC=1	.	.	.	0.000150105	.	.	.
5	90154964	TSD=GAAAGATGCTTAC;ASSESS=5;INTERNAL=NR_120601,TERMINATOR;SVTYPE=LINE1;SVLEN=6019;MEINFO=L1Ambig,0,6019,+;DIFF=0.1:n6,i73g,t82a,t231c,t254a,c255g,g352a,n361,n365,n367,n373,t411g,n447-6019;LP=24822;RP=19513;RA=0.347;ISTP=0;PRIOR=false;SR=20875	0.978235	0.969198	0.993705	0.91369	0.992063	0.983478	.
5	90643333	TSD=AAGGCTTCCTTT;ASSESS=5;INTERNAL=NR_003149,INTRONIC;SVTYPE=LINE1;SVLEN=6019;MEINFO=L1Ta1d,0,6019,-;DIFF=0.12:t231c,n471,n475,n494,n523,n537,n550-6019;LP=38;RP=61;RA=-0.683;ISTP=0;PRIOR=false;SR=41	0.00299521	0.002149	.	0.0108076	.	0.000869565	.
5	90695620	TSD=TGTTGTTTAACTTTTT;ASSESS=5;INTERNAL=ADGRV1,INTRONIC;SVTYPE=LINE1;SVLEN=6018;MEINFO=L1Ambig,1,6019,-;DIFF=0.08:i73g,t231c,c251t,t254a,g285c,t290c,a301c,g302a,c305g,g313a,n317-322,c324a,n327,n332-333,n335,n338-339,n342,n344-349,n351-353,g355a,n358-361,n365-366,t374g,n377,t380a,n382,t384a,n387,n390,n392,n395-398,a402g,n405,n409-411,n420,n425,n428-429,n433-434,n441,n450,n453-454,n465-6019;LP=10;RP…	.	.	.	0.000150105	.	.	.
5	90985222	TSD=AAAAAAATCA;ASSESS=5;INTERNAL=ADGRV1,INTRONIC;SVTYPE=LINE1;SVLEN=6019;MEINFO=L1Ambig,0,6019,+;DIFF=0.06:n1-787,g999a,c1029t,g1081a,n1091,n1094,n1098,n1105,n1117,n1135,n1140-6019;LP=13;RP=1;RA=3.7;ISTP=0;PRIOR=false;SR=11;AF=0.000150105;AC=1	.	.	.	0.000150105	.	.	.
5	91141571	TSD=CAACAAAAGCAATTTTA;ASSESS=5;INTERNAL=NR_003149,INTRONIC;SVTYPE=LINE1;SVLEN=6015;MEINFO=L1Ta1d,4,6019,-;DIFF=0.1:n1-3,t231c,t254a,c327t,n403-6019;LP=41;RP=69;RA=-0.751;ISTP=0;PRIOR=false;SR=53;GENE=ADGRV1;AF=0.000798722;AC=4	0.000798722	.	.	.	.	.	.
5	92964480	TSD=CAATTTTCTGTTTT;ASSESS=5;INTERNAL=null,null;SVTYPE=LINE1;SVLEN=6018;MEINFO=L1Ta1d,1,6019,-;DIFF=0.14:c37t,t231c,t254a,n316,n469-6019;LP=10;RP=17;RA=-0.766;ISTP=0;PRIOR=false;SR=17;AF=0.000199681;AC=1	0.000199681	.	.	.	.	.	.
5	94311668	TSD=TGTATAATATAATTTCT;ASSESS=5;INTERNAL=KIAA0825,INTRONIC;SVTYPE=LINE1;SVLEN=6018;MEINFO=L1Ambig,1,6019,-;DIFF=0.07:n1-3,i73g,c115a,c143t,g167a,t231c,t254a,c257t,g352a,n395-6019;LP=7;RP=13;RA=-0.893;ISTP=0;PRIOR=false;SR=9;AF=0.000150105;AC=1	.	.	.	0.000150105	.	.	.
5	94850595	TSD=AAAGACTGCACACTGCA;ASSESS=5;INTERNAL=NM_024717,INTRONIC;SVTYPE=LINE1;SVLEN=6019;MEINFO=L1Ta1d,0,6019,+;DIFF=0.06:n385-6019;LP=14;RP=2;RA=2.807;ISTP=0;PRIOR=false;SR=8	.	.	.	.	.	0.000869565	.
5	95531704	TSD=AAGAAGTTACC;ASSESS=5;INTERNAL=NM_014639,INTRONIC;SVTYPE=LINE1;SVLEN=6019;MEINFO=L1Ambig,0,6019,+;DIFF=0.12:n1-3,i73g,c115a,g167a,c226t,t231c,t254a,c257t,g352a,n423,n483-6019;LP=13;RP=9;RA=0.531;ISTP=0;PRIOR=false;SR=5;GENE=TTC37;AF=0.000199681;AC=1	0.000199681	.	.	.	.	.	.
5	96988018	TSD=null;ASSESS=4;INTERNAL=NM_175920,INTRONIC;SVTYPE=LINE1;SVLEN=6005;MEINFO=L1Ambig,13,6018,-;DIFF=0.1:n1-12,i73g,t231c,c251t,t254a,n331-352,a580g,n591,n615-6019;LP=11;RP=13;RA=-0.241;ISTP=0;PRIOR=false;SR=4	0.000199681	0.000716332	.	.	.	.	.
5	98597033	TSD=CACTTCTCTCTT;ASSESS=5;INTERNAL=null,null;SVTYPE=LINE1;SVLEN=6013;MEINFO=L1Ta,5,6018,-;DIFF=0.07:n1-5572,n5723-5810,n5816,n5818;LP=129;RP=93;RA=0.472;ISTP=0;PRIOR=false;SR=119;AF=0.00279553;AC=14	0.00279553	.	.	.	.	.	.
5	99113497	TSD=null;ASSESS=4;INTERNAL=null,null;SVTYPE=LINE1;SVLEN=6015;MEINFO=L1Ta,3,6018,-;DIFF=0.11:n1-5617,n5627,n5636,n5639,n5641,n5645-5647,n5649,n5657,g5658t,n5660-5661,n5679,n5700,n5766;LP=13;RP=13;RA=0;ISTP=0;PRIOR=false;SR=7;AF=0.000199681;AC=1	0.000199681	.	.	.	.	.	.
5	99905181	TSD=AGAAAATAATCAGGTA;ASSESS=5;INTERNAL=null,null;SVTYPE=LINE1;SVLEN=6019;MEINFO=L1Ta1d,0,6019,+;DIFF=0.13:n1-3,t231c,t254a,c255t,n564-6019;LP=50;RP=15;RA=1.737;ISTP=0;PRIOR=false;SR=31	0.000798722	0.00143266	.	0.00195137	.	.	.
5	101221661	TSD=AGAAAAAGCATTTA;ASSESS=5;INTERNAL=null,null;SVTYPE=LINE1;SVLEN=6019;MEINFO=L1Ta1d,0,6019,+;DIFF=0.11:n1-2,t231c,t254a,n383,n432,n449,n493-6019;LP=25;RP=10;RA=1.322;ISTP=0;PRIOR=false;SR=10;AF=0.000199681;AC=1	0.000199681	.	.	.	.	.	.
5	102087053	TSD=GAAATTAACCTTTCA;ASSESS=5;INTERNAL=SLCO4C1,TERMINATOR;SVTYPE=LINE1;SVLEN=6018;MEINFO=L1Ta1d,1,6019,+;DIFF=0.05:n1,t231c,t254a,n331-6019;LP=12;RP=1;RA=3.585;ISTP=0;PRIOR=false;SR=7;AF=0.000150105;AC=1	.	.	.	0.000150105	.	.	.
5	102895941	TSD=GAAAAGCATGAACC;ASSESS=5;INTERNAL=PAM,INTRONIC;SVTYPE=LINE1;SVLEN=6019;MEINFO=L1Ta1d,0,6019,+;DIFF=0.06:g61c,t231c,t254a,n339,n351,n375,n389-6019;LP=32;RP=10;RA=1.678;ISTP=0;PRIOR=false;SR=33;AF=0.00030021;AC=2	.	.	.	0.00030021	.	.	.
5	104065663	TSD=GAGTTTTTATT;ASSESS=5;INTERNAL=NUDT12,PROMOTER;SVTYPE=LINE1;SVLEN=6019;MEINFO=L1Ta1d,0,6019,-;DIFF=0.09:t231c,t254a,n447-6019;LP=10;RP=13;RA=-0.379;ISTP=0;PRIOR=false;SR=15;AF=0.000150105;AC=1	.	.	.	0.000150105	.	.	.
5	104542037	TSD=GAGGCAAATACTATTGTT;ASSESS=5;INTERNAL=null,null;SVTYPE=LINE1;SVLEN=6019;MEINFO=L1Ta1d,0,6019,-;DIFF=0.1:g184c,g210c,t231c,t254a,n532-6019;LP=22;RP=56;RA=-1.348;ISTP=0;PRIOR=false;SR=34	0.00219649	0.002149	.	.	.	.	.
5	105426167	TSD=TATTTTAATTTTT;ASSESS=5;INTERNAL=null,null;SVTYPE=LINE1;SVLEN=6016;MEINFO=L1Ambig,3,6019,-;DIFF=0.13:n1-3,g38a,i72c,g83c,t153c,t231c,t254a,g313a,g352a,n409,n497-6019;LP=15;RP=13;RA=0.206;ISTP=0;PRIOR=false;SR=15;AF=0.000199681;AC=1	0.000199681	.	.	.	.	.	.
5	106481545	TSD=AAAAGTTCCTCTTTTC;ASSESS=5;INTERNAL=null,null;SVTYPE=LINE1;SVLEN=6018;MEINFO=L1Ta1d,1,6019,+;DIFF=0.08:n1,t231c,t254a,n317-6019;LP=13;RP=7;RA=0.893;ISTP=0;PRIOR=false;SR=18	.	.	.	.	.	0.000869565	.
5	106599672	TSD=AGAAATTGTG;ASSESS=5;INTERNAL=null,null;SVTYPE=LINE1;SVLEN=6013;MEINFO=L1Ta,6,6019,+;DIFF=0.09:n1-5512,n5663-5691,c5899t;LP=2903;RP=1639;RA=0.825;ISTP=0;PRIOR=false;SR=1430	0.130791	0.113181	0.122752	0.0881117	0.103175	0.147826	.
5	108099928	TSD=CCAACCATTTTCTT;ASSESS=5;INTERNAL=NM_001163315,INTRONIC;SVTYPE=LINE1;SVLEN=6014;MEINFO=L1Ta1d,5,6019,-;DIFF=0.07:n1-2,t231c,t254a,n395-6019;LP=2;RP=18;RA=-3.17;ISTP=0;PRIOR=false;SR=14;GENE=FBXL17;AF=0.000199681;AC=1	0.000199681	.	.	.	.	.	.
5	108316696	TSD=null;ASSESS=4;INTERNAL=NM_001163315,INTRONIC;SVTYPE=LINE1;SVLEN=6006;MEINFO=L1Ta,12,6018,-;DIFF=0.07:n1-5651,a5784t,a6006g;LP=20;RP=4;RA=2.322;ISTP=0;PRIOR=false;SR=8;GENE=FBXL17;AF=0.000199681;AC=1	0.000199681	.	.	.	.	.	.
5	109106535	TSD=TATTAAGCTGTATTTTTATTTTT;ASSESS=5;INTERNAL=NM_001308031,INTRONIC;SVTYPE=LINE1;SVLEN=6019;MEINFO=L1Ta1d,0,6019,-;DIFF=0.12:n1-2,t231c,t254a,n392-6019;LP=10;RP=16;RA=-0.678;ISTP=0;PRIOR=false;SR=11	0.00179712	0.000716332	.	0.000150105	.	0.000869565	.
5	109662225	TSD=AAGAAAATATC;ASSESS=5;INTERNAL=null,null;SVTYPE=LINE1;SVLEN=6019;MEINFO=L1Ta1d,0,6019,+;DIFF=0.12:n457-6019;LP=18;RP=20;RA=-0.152;ISTP=0;PRIOR=false;SR=18;GENE=LOC105379118;AF=0.000199681;AC=1	0.000199681	.	.	.	.	.	.
5	109986342	TSD=AAGAATTGGTGCTA;ASSESS=5;INTERNAL=LINC01848,TERMINATOR;SVTYPE=LINE1;SVLEN=6019;MEINFO=L1Ta,0,6019,+;DIFF=0.09:n1-5664,c5748g,c5788a;LP=9;RP=9;RA=0;ISTP=0;PRIOR=false;SR=15;AF=0.000150105;AC=1	.	.	.	0.000150105	.	.	.
5	111741229	TSD=CCTGTATAATCAATTCTTT;ASSESS=5;INTERNAL=NREP,INTRONIC;SVTYPE=LINE1;SVLEN=6019;MEINFO=L1Ta1d,0,6019,-;DIFF=0.12:t231c,t254a,c324a,n442-6019;LP=14;RP=14;RA=0;ISTP=0;PRIOR=false;SR=12;AF=0.000150105;AC=1	.	.	.	0.000150105	.	.	.
5	112845601	TSD=AAGATATTCAG;ASSESS=5;INTERNAL=NM_001127510,3_UTR;SVTYPE=LINE1;SVLEN=6016;MEINFO=L1Ta1d,3,6019,+;DIFF=0.09:n1-2,n462-6019;LP=41;RP=21;RA=0.965;ISTP=0;PRIOR=false;SR=30	0.000199681	0.00143266	.	.	.	.	.
5	113177036	TSD=AACAATAACAACTCTT;ASSESS=5;INTERNAL=NM_001085377,INTRONIC;SVTYPE=LINE1;SVLEN=6019;MEINFO=L1Ta,0,6019,-;DIFF=0.1:n1-5582,n5604,n5635,n5638-5639,n5656,n5689,n5693,n5720,n5723,n5733-5745;LP=9;RP=17;RA=-0.918;ISTP=0;PRIOR=false;SR=9;GENE=MCC;AF=0.000199681;AC=1	0.000199681	.	.	.	.	.	.
5	113230121	TSD=AAAAATGGCCATTGTAG;ASSESS=5;INTERNAL=MCC,INTRONIC;SVTYPE=LINE1;SVLEN=6017;MEINFO=L1Ta1d,2,6019,+;DIFF=0.1:n1,n369,n433-6019;LP=37;RP=19;RA=0.962;ISTP=0;PRIOR=false;SR=47;AF=0.00030021;AC=2	.	.	.	0.00030021	.	.	.
5	115953232	TSD=null;ASSESS=3;INTERNAL=LVRN,PROMOTER;SVTYPE=LINE1;SVLEN=6008;MEINFO=L1Ta1d,10,6018,+;DIFF=0.06:n1-9,t231c,t254a,n389-6019;LP=13;RP=10;RA=0.379;ISTP=0;PRIOR=false;SR=4;AF=0.000150105;AC=1	.	.	.	0.000150105	.	.	.
5	117288372	TSD=AAGATAAAGTATACCCTG;ASSESS=5;INTERNAL=null,null;SVTYPE=LINE1;SVLEN=6019;MEINFO=L1Ta1d,0,6019,+;DIFF=0.13:n1-2,t231c,t254a,n401,n409,n445,n479-6019;LP=19;RP=15;RA=0.341;ISTP=0;PRIOR=false;SR=19	0.000599042	0.000716332	.	0.00090063	.	.	.
5	117673841	TSD=GAAAACACTAG;ASSESS=5;INTERNAL=null,null;SVTYPE=LINE1;SVLEN=6017;MEINFO=L1Ta,2,6019,+;DIFF=0.11:n1-5573,a6006g;LP=27;RP=15;RA=0.848;ISTP=0;PRIOR=false;SR=12;AF=0.00139776;AC=7	0.00139776	.	.	0.00150105	.	.	.
5	118297375	TSD=AAAAAATGCCCCATTTA;ASSESS=5;INTERNAL=null,null;SVTYPE=LINE1;SVLEN=6018;MEINFO=L1Ambig,1,6019,+;DIFF=0.11:n1-3,i73g,c115a,c143t,g167a,t231c,t254a,c257t,g352a,n467-6019;LP=8;RP=11;RA=-0.459;ISTP=0;PRIOR=false;SR=8;AF=0.000199681;AC=1	0.000199681	.	.	.	.	.	.
5	118365772	TSD=AAGAATTGAA;ASSESS=5;INTERNAL=HRAT56,INTRONIC;SVTYPE=LINE1;SVLEN=6016;MEINFO=L1Ta,2,6018,+;DIFF=0.08:n1-5647;LP=9;RP=17;RA=-0.918;ISTP=0;PRIOR=false;SR=12;AF=0.000150105;AC=1	.	.	.	0.000150105	.	.	.
5	118651339	TSD=TAAAATTTTCT;ASSESS=5;INTERNAL=null,null;SVTYPE=LINE1;SVLEN=6015;MEINFO=L1Ambig,4,6019,-;DIFF=0.12:n1-3,i73g,t231c,c251t,t254a,c327t,n352-6019;LP=14;RP=15;RA=-0.1;ISTP=0;PRIOR=false;SR=18;AF=0.000199681;AC=1	0.000199681	.	.	0.00030021	.	.	.
5	118758953	TSD=GAAAAATTGGAACTGGG;ASSESS=5;INTERNAL=DTWD2,TERMINATOR;SVTYPE=LINE1;SVLEN=6019;MEINFO=L1Ta1d,0,6019,+;DIFF=0.09:t231c,t254a,c324a,n338-6019;LP=75;RP=58;RA=0.371;ISTP=0;PRIOR=false;SR=80;AF=0.00090063;AC=6	.	.	.	0.00090063	.	.	.
5	120483215	TSD=AAGAATTCA;ASSESS=5;INTERNAL=NM_001308087,INTRONIC;SVTYPE=LINE1;SVLEN=6019;MEINFO=L1Ta1d,0,6019,+;DIFF=0.06:n1-3,n6-7,n11,t231c,t254a,n364-6019;LP=10;RP=1;RA=3.322;ISTP=0;PRIOR=false;SR=12;GENE=PRR16;AF=0.000199681;AC=1	0.000199681	.	.	.	.	.	.
5	121182965	TSD=TCTGGCTTCTGTACGTCTT;ASSESS=5;INTERNAL=null,null;SVTYPE=LINE1;SVLEN=6017;MEINFO=L1Ta1d,2,6019,-;DIFF=0.08:n1-2,g142c,t231c,t254a,n327-6019;LP=22;RP=56;RA=-1.348;ISTP=0;PRIOR=false;SR=39	0.000599042	.	.	.	0.00793651	0.0026178	.
5	121845332	TSD=AAAGATTTAATTCCCTGACAA;ASSESS=5;INTERNAL=NM_177478,PROMOTER;SVTYPE=LINE1;SVLEN=6015;MEINFO=L1Ta,3,6018,-;DIFF=0.11:n1-5629,n5684,c5830g;LP=53;RP=44;RA=0.268;ISTP=0;PRIOR=false;SR=17;GENE=LOC105379150;AF=0.000798722;AC=4	0.000798722	.	.	0.00480336	.	.	.
5	123232120	TSD=GAAAAAGCAGT;ASSESS=5;INTERNAL=null,null;SVTYPE=LINE1;SVLEN=6019;MEINFO=L1Ambig,0,6019,+;DIFF=0.11:i73g,g156a,c160t,t231c,t254a,g313a,g352a,n406-6019;LP=20;RP=15;RA=0.415;ISTP=0;PRIOR=false;SR=15	0.000199681	0.000716332	.	.	.	.	.
5	123590957	TSD=TTCTTTTAATTTTCTT;ASSESS=5;INTERNAL=NM_001044723,INTRONIC;SVTYPE=LINE1;SVLEN=6016;MEINFO=L1Ta1d,3,6019,-;DIFF=0.05:n1-3,a96t,t231c,t254a,n338-6019;LP=1;RP=11;RA=-3.459;ISTP=0;PRIOR=false;SR=8;GENE=CSNK1G3;AF=0.000199681;AC=1	0.000199681	.	.	.	.	.	.
5	123720482	TSD=GTAAAGGTTT;ASSESS=5;INTERNAL=null,null;SVTYPE=LINE1;SVLEN=6019;MEINFO=L1Ta1d,0,6019,-;DIFF=0.1:g210c,t231c,g232c,t254a,n332-415,n423,n457,n475,n566-6019;LP=11;RP=24;RA=-1.126;ISTP=0;PRIOR=false;SR=9;AF=0.000199681;AC=1	0.000199681	.	.	0.000150105	.	.	.
5	124873518	TSD=CTATATTTTTGTT;ASSESS=5;INTERNAL=null,null;SVTYPE=LINE1;SVLEN=6018;MEINFO=L1Ta1d,1,6019,-;DIFF=0.08:t231c,n360,n382-6019;LP=4;RP=15;RA=-1.907;ISTP=0;PRIOR=false;SR=10;GENE=LOC105379157;AF=0.000199681;AC=1	0.000199681	.	.	.	.	.	.
5	125042921	TSD=TAAAATTACTTCTTGTTGA;ASSESS=5;INTERNAL=NR_109882,INTRONIC;SVTYPE=LINE1;SVLEN=6019;MEINFO=L1Ta1d,0,6019,+;DIFF=0.06:t231c,t254a,n486-6019;LP=19;RP=1;RA=4.248;ISTP=0;PRIOR=false;SR=10;GENE=LOC101927421;AF=0.000199681;AC=1	0.000199681	.	.	.	.	.	.
5	125420018	TSD=GAAATATATATGTGTAT;ASSESS=5;INTERNAL=null,null;SVTYPE=LINE1;SVLEN=6018;MEINFO=L1Ta1d,1,6019,+;DIFF=0.09:n1,g210c,t231c,t254a,n368-6019;LP=20;RP=11;RA=0.862;ISTP=0;PRIOR=false;SR=13;AF=0.000199681;AC=1	0.000199681	.	.	.	.	.	.
5	126109974	TSD=AGAAACTTTTTATT;ASSESS=5;INTERNAL=LINC02039,PROMOTER;SVTYPE=LINE1;SVLEN=6006;MEINFO=L1Ambig,13,6019,+;DIFF=0.09:n1-13,i73g,t82a,t231c,t254a,c255g,g352a,n372-6019;LP=29;RP=15;RA=0.951;ISTP=0;PRIOR=false;SR=25;AF=0.00030021;AC=2	.	.	.	0.00030021	.	.	.
5	126235253	TSD=AACATTAAAAACTG;ASSESS=5;INTERNAL=null,null;SVTYPE=LINE1;SVLEN=6019;MEINFO=L1Ta1d,0,6019,+;DIFF=0.08:n340-6019;LP=16;RP=4;RA=2;ISTP=0;PRIOR=false;SR=12	.	.	.	.	.	0.000869565	.
5	127044277	TSD=GGATTCTTCTT;ASSESS=5;INTERNAL=NM_001164479,3_UTR;SVTYPE=LINE1;SVLEN=6018;MEINFO=L1Ta1d,1,6019,-;DIFF=0.1:c115a,t231c,t254a,c269t,n386-6019;LP=9;RP=16;RA=-0.83;ISTP=0;PRIOR=false;SR=16;GENE=C5orf63;AF=0.000199681;AC=1	0.000199681	.	.	.	.	.	.
5	127456621	TSD=TAAAATGCAAGTCA;ASSESS=5;INTERNAL=NM_032446,INTRONIC;SVTYPE=LINE1;SVLEN=6019;MEINFO=L1Ta1d,0,6019,+;DIFF=0.05:g167a,t231c,t254a,c324a,n356-6019;LP=22;RP=2;RA=3.459;ISTP=0;PRIOR=false;SR=6	.	.	.	.	.	0.000869565	.
5	130756401	TSD=AAGATCTGAAGGAACTG;ASSESS=5;INTERNAL=HINT1,TERMINATOR;SVTYPE=LINE1;SVLEN=6019;MEINFO=L1Ta1d,0,6019,+;DIFF=0.09:t231c,t254a,n312-354,n358-361,n363-369,n371-372,n375,n377,n379,n382,n386-388,n390-391,n394-395,n397-400,n402,n404,n406,n410,n413,n418,n421,n424,n426,n429,n441,n443,n459,n463-464,n478,n493-6019;LP=15;RP=15;RA=0;ISTP=0;PRIOR=false;SR=16;AF=0.000150105;AC=1	.	.	.	0.000150105	.	.	.
5	130921702	TSD=GAAAACACAGATTCCC;ASSESS=5;INTERNAL=null,null;SVTYPE=LINE1;SVLEN=6014;MEINFO=L1Ta,4,6018,+;DIFF=0.09:n1-5633,n5660,n5670,n5673,n5675-5676,c5748g;LP=41;RP=45;RA=-0.134;ISTP=0;PRIOR=false;SR=19	0.0105831	0.015043	.	0.0336235	.	.	.
5	131315225	TSD=null;ASSESS=3;INTERNAL=NM_001038702,INTRONIC;SVTYPE=LINE1;SVLEN=6017;MEINFO=L1Ta1d,2,6019,-;DIFF=0.08:n1-2,t231c,t254a,n515-6019;LP=1;RP=17;RA=-4.087;ISTP=-1;PRIOR=false;SR=12	.	0.000716332	.	.	.	.	.
5	131315242	TSD=TAGATGAACTATATCTT;ASSESS=5;INTERNAL=NM_001038702,INTRONIC;SVTYPE=LINE1;SVLEN=6017;MEINFO=L1Ta1d,2,6019,-;DIFF=0.09:n1-2,t231c,t254a,n411,n423,n585-6019;LP=7;RP=40;RA=-2.515;ISTP=0;PRIOR=false;SR=29;GENE=CDC42SE2;AF=0.000599042;AC=3	0.000599042	.	.	0.00150105	.	.	.
5	133401296	TSD=ACTCTTGGTTCTTTCTT;ASSESS=5;INTERNAL=NM_015082,INTRONIC;SVTYPE=LINE1;SVLEN=6017;MEINFO=L1Ta1d,2,6019,-;DIFF=0.1:n1,g285t,n476-6019;LP=10;RP=13;RA=-0.379;ISTP=0;PRIOR=false;SR=9;GENE=FSTL4;AF=0.000199681;AC=1	0.000199681	.	.	.	.	.	.
5	133570340	TSD=AAATTTTTTTATTCTT;ASSESS=5;INTERNAL=NM_015082,INTRONIC;SVTYPE=LINE1;SVLEN=6015;MEINFO=L1Ta1d,4,6019,-;DIFF=0.11:n1-3,c144g,t231c,t254a,n377-378,n390,n392,n397,n550-6019;LP=14;RP=24;RA=-0.778;ISTP=0;PRIOR=false;SR=22	0.000998403	0.000716332	.	.	.	.	.
5	133661815	TSD=TACAACAGATTCTTT;ASSESS=5;INTERNAL=MIR1289-2,PROMOTER;SVTYPE=LINE1;SVLEN=6018;MEINFO=L1Ta1d,1,6019,-;DIFF=0.07:n1,t231c,t254a,n271-6019;LP=41;RP=114;RA=-1.475;ISTP=0;PRIOR=false;SR=106;AF=0.00120084;AC=8	.	.	.	0.00120084	.	.	.
5	135371923	TSD=AAAAATTTACGGTATGA;ASSESS=5;INTERNAL=NM_004893,INTRONIC;SVTYPE=LINE1;SVLEN=6010;MEINFO=L1Ta1d,8,6018,+;DIFF=0.09:n1-7,t231c,t254a,c327t,n433-6019;LP=189;RP=108;RA=0.807;ISTP=0;PRIOR=false;SR=84;GENE=H2AFY;AF=0.00199681;AC=10	0.00199681	.	.	.	.	.	.
5	135508091	TSD=CACATCAGTCTTTA;ASSESS=5;INTERNAL=null,null;SVTYPE=LINE1;SVLEN=6019;MEINFO=L1Ambig,0,6019,-;DIFF=0.11:n1-787,g999a,n1143-6019;LP=40;RP=58;RA=-0.536;ISTP=0;PRIOR=false;SR=43	0.00479233	0.00716332	.	0.0165116	0.00793651	.	.
5	137679101	TSD=GATAGTACTATTTTTT;ASSESS=5;INTERNAL=NM_017415,INTRONIC;SVTYPE=LINE1;SVLEN=6018;MEINFO=L1Ta1d,1,6019,-;DIFF=0.11:n1-2,t231c,t254a,n463-6019;LP=4884;RP=6993;RA=-0.518;ISTP=0;PRIOR=false;SR=6978	0.304513	0.27149	0.310252	0.151756	0.357143	0.293043	.
5	138030664	TSD=AAGGTATAATTTAC;ASSESS=5;INTERNAL=NM_016603,INTRONIC;SVTYPE=LINE1;SVLEN=6017;MEINFO=L1Ta1d,2,6019,+;DIFF=0.1:n1-2,t231c,t254a,n409-489,n506,n599-600,n636,n640-6019;LP=26;RP=11;RA=1.241;ISTP=0;PRIOR=false;SR=15;GENE=FAM13B;AF=0.000199681;AC=1	0.000199681	.	.	.	.	.	.
5	142317635	TSD=TTTTTTTTTTTTTTTT;ASSESS=5;INTERNAL=SPRY4-IT1,3_UTR;SVTYPE=LINE1;SVLEN=6016;MEINFO=L1Ambig,2,6018,-;DIFF=0.06:n1-900,c950a,n977-1046,t1063a,g1076a,c1151t,n1185-6019;LP=16;RP=27;RA=-0.755;ISTP=0;PRIOR=false;SR=27	.	.	.	.	.	.	0.000251838
5	143273651	TSD=GAACCCAGATTTGTTT;ASSESS=5;INTERNAL=NM_001020825,TERMINATOR;SVTYPE=LINE1;SVLEN=6017;MEINFO=L1Ta1d,2,6019,-;DIFF=0.09:n1,g38c,c482a,n493-6019;LP=7;RP=23;RA=-1.716;ISTP=0;PRIOR=false;SR=12;AF=0.000199681;AC=1	0.000199681	.	.	.	.	.	.
5	143308991	TSD=GAGGAAAATTTTTT;ASSESS=5;INTERNAL=NM_001204265,INTRONIC;SVTYPE=LINE1;SVLEN=6018;MEINFO=L1Ta1d,1,6019,-;DIFF=0.12:n1-2,t231c,t254a,a423g,n561-6019;LP=12;RP=19;RA=-0.663;ISTP=0;PRIOR=false;SR=21	0.000599042	0.000716332	.	.	.	.	.
5	144034324	TSD=AAGAATTCATCATG;ASSESS=5;INTERNAL=null,null;SVTYPE=LINE1;SVLEN=6019;MEINFO=L1Ambig,0,6019,+;DIFF=0.13:n1-2,c54t,i73g,t153c,t231c,g246c,g252a,t254a,t268c,t291c,g313a,g318a,g321c,c327g,g352a,g364a,t376g,n451-470,n473,n483,n488,n494-495,c512t,n646-6019;LP=1076;RP=795;RA=0.437;ISTP=0;PRIOR=false;SR=1057	0.0423323	0.0393983	.	0.0740018	.	0.00782609	.
5	144811054	TSD=CTCCTTGGTTTCTTTTC;ASSESS=5;INTERNAL=null,null;SVTYPE=LINE1;SVLEN=6015;MEINFO=L1Ta1d,4,6019,-;DIFF=0.1:n1-4,t25c,t231c,t254a,g520a,n557-6019;LP=3;RP=18;RA=-2.585;ISTP=0;PRIOR=false;SR=11	0.000199681	0.000716332	.	.	.	.	.
5	145855569	TSD=AGAAATCTAAC;ASSESS=5;INTERNAL=NM_001080516,TERMINATOR;SVTYPE=LINE1;SVLEN=6018;MEINFO=L1Ta1d,1,6019,+;DIFF=0.11:n1,g138a,t231c,t254a,n400,n568-6019;LP=25;RP=12;RA=1.059;ISTP=0;PRIOR=false;SR=19;AF=0.000199681;AC=1	0.000199681	.	.	.	.	.	.
5	145918468	TSD=AAAAGTAAATATTTTG;ASSESS=5;INTERNAL=null,null;SVTYPE=LINE1;SVLEN=6019;MEINFO=L1Ta1d,0,6019,+;DIFF=0.12:t231c,t254a,a423g,n483-6019;LP=16;RP=11;RA=0.541;ISTP=0;PRIOR=false;SR=13;GENE=GRXCR2;AF=0.000199681;AC=1	0.000199681	.	.	.	.	.	.
5	146051661	TSD=AAAACGAGCATGTT;ASSESS=5;INTERNAL=SH3RF2,INTRONIC;SVTYPE=LINE1;SVLEN=6018;MEINFO=L1Ta1d,1,6019,+;DIFF=0.11:n1,g15a,t231c,t254a,n348-384,n536-6019;LP=65;RP=43;RA=0.596;ISTP=0;PRIOR=false;SR=39;AF=0.00060042;AC=4	.	.	.	0.00060042	.	.	.
5	146226414	TSD=GGAGTTTCATTCTT;ASSESS=5;INTERNAL=RBM27,INTRONIC;SVTYPE=LINE1;SVLEN=6008;MEINFO=L1Ta,11,6019,-;DIFF=0.1:n1-5428,n5590,n5643,n5646,g5660a,n5661,n5666-5692,n5739;LP=77;RP=74;RA=0.057;ISTP=0;PRIOR=false;SR=103;GENE=RBM27	.	.	0.00314748	.	.	.	.
5	146605580	TSD=AGAATGTTCAGCAACATA;ASSESS=5;INTERNAL=PPP2R2B,INTRONIC;SVTYPE=LINE1;SVLEN=6019;MEINFO=L1Ta1d,0,6019,+;DIFF=0.09:g167a,t231c,t254a,c324a,n349,n365-366,n395,n406,n425,n455,n467,n487,n520-6019;LP=29;RP=29;RA=0;ISTP=0;PRIOR=false;SR=39;AF=0.000450315;AC=3	.	.	.	0.000450315	.	.	.
5	147727835	TSD=CTGGAAAAAAGGTTTTTTT;ASSESS=5;INTERNAL=JAKMIP2,INTRONIC;SVTYPE=LINE1;SVLEN=6017;MEINFO=L1Ta1d,2,6019,-;DIFF=0.09:t231c,t254a,c255t,n319-6019;LP=8;RP=19;RA=-1.248;ISTP=0;PRIOR=false;SR=11;AF=0.000150105;AC=1	.	.	.	0.000150105	.	.	.
5	148138799	TSD=null;ASSESS=4;INTERNAL=NM_006846,TERMINATOR;SVTYPE=LINE1;SVLEN=6014;MEINFO=L1Ta1d,4,6018,-;DIFF=0.1:n1-3,n389-6019;LP=7;RP=15;RA=-1.1;ISTP=0;PRIOR=false;SR=2;AF=0.000199681;AC=1	0.000199681	.	.	.	.	.	.
5	148487700	TSD=AGAGATAGAGACAG;ASSESS=5;INTERNAL=NM_000870,INTRONIC;SVTYPE=LINE1;SVLEN=6019;MEINFO=L1Ta1d,0,6019,+;DIFF=0.1:c144g,t231c,t254a,n400-6019;LP=18;RP=5;RA=1.848;ISTP=0;PRIOR=false;SR=18;GENE=HTR4;AF=0.000199681;AC=1	0.000199681	.	.	.	.	.	.
5	148638046	TSD=TGGAAATCTGTT;ASSESS=5;INTERNAL=NM_000870,INTRONIC;SVTYPE=LINE1;SVLEN=6003;MEINFO=L1Ta1d,16,6019,-;DIFF=0.1:n1-15,g138a,t231c,t254a,c327t,n400,n541-6019;LP=8;RP=23;RA=-1.524;ISTP=0;PRIOR=false;SR=14	0.000199681	0.000716332	.	.	.	.	.
5	148710236	TSD=TAGAAGGACAACAG;ASSESS=5;INTERNAL=null,null;SVTYPE=LINE1;SVLEN=6007;MEINFO=L1Ta1d,12,6019,+;DIFF=0.1:n1-12,t231c,t254a,n466-6019;LP=19;RP=8;RA=1.248;ISTP=0;PRIOR=false;SR=16;AF=0.000199681;AC=1	0.000199681	.	.	.	.	.	.
5	148722120	TSD=AAGAAAATAAACA;ASSESS=5;INTERNAL=null,null;SVTYPE=LINE1;SVLEN=6019;MEINFO=L1Ta1d,0,6019,+;DIFF=0.1:t231c,t254a,n364-487,n638-6019;LP=21;RP=11;RA=0.933;ISTP=0;PRIOR=false;SR=18;AF=0.000199681;AC=1	0.000199681	.	.	0.00030021	.	.	.
5	148859056	TSD=AGTATCTTTGTTTT;ASSESS=5;INTERNAL=null,null;SVTYPE=LINE1;SVLEN=6015;MEINFO=L1Ta1d,4,6019,-;DIFF=0.12:n1-3,t82g,t231c,t254a,n282-291,n298,n497-6019;LP=11;RP=14;RA=-0.348;ISTP=0;PRIOR=false;SR=13	0.000599042	0.000716332	.	.	.	.	.
5	151551597	TSD=CATGTCCT;ASSESS=5;INTERNAL=FAT2,3_UTR;SVTYPE=LINE1;SVLEN=6019;MEINFO=L1Ta1d,0,6019,+;DIFF=0.04:n131-6019;LP=12;RP=5;RA=1.263;ISTP=0;PRIOR=false;SR=11	.	.	.	.	.	.	1.00735e-05
5	152937488	TSD=null;ASSESS=3;INTERNAL=LINC01470,INTRONIC;SVTYPE=LINE1;SVLEN=6000;MEINFO=L1Ambig,19,6019,-;DIFF=0.05:n1-13,a16g,i73g,n156-210,n212-214,n225-226,t231c,t254a,g313a,g352a,n379-6019;LP=1;RP=10;RA=-3.322;ISTP=-1;PRIOR=false;SR=10;AF=0.000450315;AC=3	.	.	.	0.000450315	.	.	.
5	153562776	TSD=TAAAATATCTCAAGGTG;ASSESS=5;INTERNAL=GRIA1,INTRONIC;SVTYPE=LINE1;SVLEN=6019;MEINFO=L1Ta1d,0,6019,+;DIFF=0.09:c166t,n312-329,n490-6019;LP=15;RP=5;RA=1.585;ISTP=0;PRIOR=false;SR=16;AF=0.000150105;AC=1	.	.	.	0.000150105	.	.	.
5	153597424	TSD=CAAGAACTCAGGTTCT;ASSESS=5;INTERNAL=NM_001258021,INTRONIC;SVTYPE=LINE1;SVLEN=6019;MEINFO=L1Ta1d,0,6019,-;DIFF=0.1:t231c,t254a,c324a,n380,n435-6019;LP=37;RP=41;RA=-0.148;ISTP=0;PRIOR=false;SR=35;GENE=GRIA1;AF=0.000599042;AC=3	0.000599042	.	.	0.000450315	.	.	.
5	154079833	TSD=AAGACCATGTT;ASSESS=5;INTERNAL=MFAP3,TERMINATOR;SVTYPE=LINE1;SVLEN=6018;MEINFO=L1Ta1d,1,6019,-;DIFF=0.1:g210c,t231c,t254a,n292,n305,n325,a388g,n392-6019;LP=7;RP=16;RA=-1.193;ISTP=0;PRIOR=false;SR=12;AF=0.000150105;AC=1	.	.	.	0.000150105	.	.	.
5	155275715	TSD=AAGAATATTTTC;ASSESS=5;INTERNAL=KIF4B,TERMINATOR;SVTYPE=LINE1;SVLEN=6016;MEINFO=L1Ta1d,2,6018,-;DIFF=0.09:n1,g167a,t231c,t254a,c324a,n414-6019;LP=28;RP=18;RA=0.637;ISTP=0;PRIOR=false;SR=24;AF=0.00030021;AC=2	.	.	.	0.00030021	.	.	.
5	155831633	TSD=GATTTCT;ASSESS=5;INTERNAL=null,null;SVTYPE=LINE1;SVLEN=6019;MEINFO=L1Ambig,0,6019,-;DIFF=0.08:n1-5556,n5558,c5590t,a5625g,n5707-5719,n5724,n5728-5729,n5733,n5737-5738,n5740,n5744-5745,n5747,t5750a,t5751a,c5752a,c5754a,n5757,n5766,t5832a,g5846a,n5877-5878,n5897,n5902,n5909-6019;LP=4;RP=12;RA=-1.585;ISTP=0;PRIOR=false;SR=5	.	.	.	.	.	0.000869565	.
5	156357718	TSD=AAAGAATAGGCAAACAG;ASSESS=5;INTERNAL=NM_000337,INTRONIC;SVTYPE=LINE1;SVLEN=6017;MEINFO=L1Ta1d,2,6019,+;DIFF=0.06:n1-2,t231c,t254a,c327t,n391-6019;LP=19;RP=1;RA=4.248;ISTP=0;PRIOR=false;SR=22	.	.	.	.	.	0.000869565	.
5	156499682	TSD=GCGAGCATGTTCT;ASSESS=5;INTERNAL=NM_000337,INTRONIC;SVTYPE=LINE1;SVLEN=6015;MEINFO=L1Ta1d,4,6019,-;DIFF=0.1:n1-3,t231c,t254a,n463-6019;LP=6;RP=20;RA=-1.737;ISTP=0;PRIOR=false;SR=11;GENE=SGCD;AF=0.000199681;AC=1	0.000199681	.	.	.	.	.	.
5	156795639	TSD=null;ASSESS=3;INTERNAL=null,null;SVTYPE=LINE1;SVLEN=6018;MEINFO=L1Ta1d,1,6019,-;DIFF=0.06:n378-6019;LP=1;RP=24;RA=-4.585;ISTP=-1;PRIOR=false;SR=9	.	.	.	.	.	0.000869565	.
5	157498816	TSD=AAACATATTAATATT;ASSESS=5;INTERNAL=NM_033274,INTRONIC;SVTYPE=LINE1;SVLEN=6018;MEINFO=L1Ta1d,1,6019,+;DIFF=0.11:n1-2,t231c,t254a,n457-6019;LP=23;RP=15;RA=0.617;ISTP=0;PRIOR=false;SR=17;GENE=ADAM19;AF=0.000199681;AC=1	0.000199681	.	.	.	.	.	.
5	159863941	TSD=CGAGTTTTCTTTTTTT;ASSESS=5;INTERNAL=NR_109891,INTRONIC;SVTYPE=LINE1;SVLEN=6017;MEINFO=L1Ambig,2,6019,-;DIFF=0.11:n1-5535,n5593,n5615,n5651,a5931g;LP=312;RP=477;RA=-0.612;ISTP=0;PRIOR=false;SR=202	.	0.0164756	.	.	.	.	.
5	159863951	TSD=CGAGTTTTCTTTTTTTCTTTTTTTTT;ASSESS=5;INTERNAL=NR_109891,INTRONIC;SVTYPE=LINE1;SVLEN=6016;MEINFO=L1Ta1d,3,6019,-;DIFF=0.05:n1,g156a,t231c,t254a,n277-6019;LP=2;RP=17;RA=-3.087;ISTP=0;PRIOR=false;SR=3;GENE=LOC101927766	0.0165735	.	.	0.0445812	0.00793651	.	.
5	159957525	TSD=AAAAAAAAAAAAAAAAAA;ASSESS=5;INTERNAL=NM_000679,INTRONIC;SVTYPE=LINE1;SVLEN=6017;MEINFO=L1Ta1d,1,6018,-;DIFF=0.1:n372,n408-409,n476-489,n511-513,n552,n561,n569,n575-576,a577c,n583-583,n602,n609,n614,n624,n640-6019;LP=57;RP=26;RA=1.132;ISTP=0;PRIOR=false;SR=22	0.00259585	0.00358166	.	0.010057	.	.	.
5	160334552	TSD=TATCATCCTCATTTC;ASSESS=5;INTERNAL=CCNJL,INTRONIC;SVTYPE=LINE1;SVLEN=6018;MEINFO=L1Ta1d,1,6019,-;DIFF=0.09:t231c,t254a,n348-6019;LP=31;RP=49;RA=-0.661;ISTP=0;PRIOR=false;SR=52;AF=0.00060042;AC=4	.	.	.	0.00060042	.	.	.
5	161727601	TSD=AAAGAGGAAGTA;ASSESS=5;INTERNAL=null,null;SVTYPE=LINE1;SVLEN=6019;MEINFO=L1Ta1d,0,6019,+;DIFF=0.12:n509-6019;LP=44;RP=19;RA=1.212;ISTP=0;PRIOR=false;SR=33	.	0.00143266	.	.	.	.	.
5	163613460	TSD=TTTTTTCAGTCTTT;ASSESS=5;INTERNAL=MAT2B,TERMINATOR;SVTYPE=LINE1;SVLEN=6017;MEINFO=L1Ta1d,2,6019,-;DIFF=0.06:n1-2,g67t,t231c,t254a,g328a,a373g,g483a,n558-6019;LP=1;RP=16;RA=-4;ISTP=0;PRIOR=false;SR=15;AF=0.000150105;AC=1	.	.	.	0.000150105	.	.	.
5	164965518	TSD=AGTCTCATAATGTTTT;ASSESS=5;INTERNAL=null,null;SVTYPE=LINE1;SVLEN=6017;MEINFO=L1Ta1d,2,6019,-;DIFF=0.11:n1,t231c,t254a,a423g,n433-6019;LP=17;RP=27;RA=-0.667;ISTP=0;PRIOR=false;SR=26	0.000599042	0.00143266	.	.	.	.	.
5	165068154	TSD=CATGACTGAATCATTTA;ASSESS=5;INTERNAL=null,null;SVTYPE=LINE1;SVLEN=6016;MEINFO=L1Ta1d,3,6019,-;DIFF=0.07:n1-3,n25,g61c,t231c,t254a,n412-6019;LP=969;RP=1657;RA=-0.774;ISTP=0;PRIOR=false;SR=1772	0.0876597	0.0795129	0.0616007	0.0798559	0.0793651	0.0704348	.
5	165235555	TSD=AAAAAAAAAAAAAAACCTCTGTT;ASSESS=5;INTERNAL=LOC102546299,TERMINATOR;SVTYPE=LINE1;SVLEN=6007;MEINFO=L1Ambig,11,6018,+;DIFF=0.03:n1-1367,t1412g,n1500,n1512,n1519-6019;LP=2;RP=3;RA=-0.585;ISTP=0;PRIOR=false;SR=2;AF=0.000150105;AC=1	.	.	.	0.000150105	.	.	.
5	168745836	TSD=null;ASSESS=3;INTERNAL=SLIT3,INTRONIC;SVTYPE=LINE1;SVLEN=6017;MEINFO=L1Ta,1,6018,+;DIFF=0.1:n1-5632,t5700a,n5706-5707,t5732a,t5738a,g5893a,c5899t;LP=14;RP=12;RA=0.222;ISTP=0;PRIOR=false;SR=13;AF=0.000150105;AC=1	.	.	.	0.000150105	.	.	.
5	168846897	TSD=AAGAAGAAAATGCC;ASSESS=5;INTERNAL=SLIT3,INTRONIC;SVTYPE=LINE1;SVLEN=6016;MEINFO=L1Ta,3,6019,+;DIFF=0.1:n1-5452,n5604-5776,n5820;LP=21;RP=11;RA=0.933;ISTP=0;PRIOR=false;SR=13;AF=0.000150105;AC=1	.	.	.	0.000150105	.	.	.
5	169365727	TSD=AGAACATATGGCAGAG;ASSESS=5;INTERNAL=MIR585,PROMOTER;SVTYPE=LINE1;SVLEN=6017;MEINFO=L1Ta1d,2,6019,+;DIFF=0.05:n1,c144g,t231c,t254a,n321-6019;LP=21;RP=5;RA=2.07;ISTP=0;PRIOR=false;SR=13;AF=0.000150105;AC=1	.	.	.	0.000150105	.	.	.
5	169405620	TSD=GTGAGTGGCTCTTTA;ASSESS=5;INTERNAL=null,null;SVTYPE=LINE1;SVLEN=6017;MEINFO=L1Ambig,2,6019,-;DIFF=0.13:n1-2,g64a,i73g,t231c,t254a,g352a,n393-425,n445,n447,n449,n464,n475,n478,n482,g492c,n494,n533,n539,n545,n565,n574-6019;LP=23;RP=21;RA=0.131;ISTP=0;PRIOR=false;SR=28;AF=0.000199681;AC=1	0.000199681	.	.	.	.	.	.
5	171318992	TSD=TTTTGTTTTGTTTTTT;ASSESS=5;INTERNAL=TLX3,TERMINATOR;SVTYPE=LINE1;SVLEN=6012;MEINFO=L1Ta,7,6019,-;DIFF=0.11:n1-5670,t6012g;LP=33;RP=24;RA=0.459;ISTP=0;PRIOR=false;SR=36;AF=0.00030021;AC=2	.	.	.	0.00030021	.	.	.
5	171656118	TSD=AATACTTTT;ASSESS=5;INTERNAL=SMIM23,PROMOTER;SVTYPE=LINE1;SVLEN=6016;MEINFO=L1Ta,3,6019,-;DIFF=0.12:n1-5595,c5616t,a5712g,c5752a,n5873,g5890a;LP=10;RP=12;RA=-0.263;ISTP=0;PRIOR=false;SR=7;AF=0.000150105;AC=1	.	.	.	0.000150105	.	.	.
5	171757190	TSD=TAAAAATAAATA;ASSESS=5;INTERNAL=null,null;SVTYPE=LINE1;SVLEN=6017;MEINFO=L1Ta1d,2,6019,+;DIFF=0.1:n1-2,t231c,t254a,n399,n414-6019;LP=16;RP=15;RA=0.093;ISTP=0;PRIOR=false;SR=20;AF=0.00119808;AC=6	0.00119808	.	.	0.00615431	.	.	.
5	173472170	TSD=AAAAAGACAAAAACA;ASSESS=5;INTERNAL=LOC285593,PROMOTER;SVTYPE=LINE1;SVLEN=6018;MEINFO=L1Ta1d,1,6019,+;DIFF=0.08:n1,t231c,t254a,n347-6019;LP=8;RP=8;RA=0;ISTP=0;PRIOR=false;SR=3;AF=0.000150105;AC=1	.	.	.	0.000150105	.	.	.
5	179402383	TSD=AAAAAAAAAAAAAA;ASSESS=5;INTERNAL=null,null;SVTYPE=LINE1;SVLEN=6015;MEINFO=L1Ta,3,6018,-;DIFF=0.09:n1-5604,n5672,n5723,n5737,n5739,g5890c;LP=135;RP=61;RA=1.146;ISTP=0;PRIOR=false;SR=90	0.00678914	0.00644699	.	0.00840588	0.0238095	0.0113043	.
6	1050950	TSD=null;ASSESS=3;INTERNAL=LINC01622,INTRONIC;SVTYPE=LINE1;SVLEN=6013;MEINFO=L1Ta1d,5,6018,+;DIFF=0.1:n1-4,g210c,t231c,t254a,n473-6019;LP=17;RP=9;RA=0.918;ISTP=0;PRIOR=false;SR=4;AF=0.000150105;AC=1	.	.	.	0.000150105	.	.	.
6	1108885	TSD=CCTATTTTATTTCTT;ASSESS=5;INTERNAL=NR_027115,PROMOTER;SVTYPE=LINE1;SVLEN=6019;MEINFO=L1Ta1d,0,6019,-;DIFF=0.1:n1-2,t25c,t231c,t254a,n379-6019;LP=79;RP=145;RA=-0.876;ISTP=0;PRIOR=false;SR=112;AF=0.00159744;AC=8	0.00159744	.	.	0.00915641	.	.	.
6	1532179	TSD=null;ASSESS=3;INTERNAL=null,null;SVTYPE=LINE1;SVLEN=6016;MEINFO=L1Ta1d,2,6018,-;DIFF=0.06:n1,g210c,t231c,t254a,n308-6019;LP=13;RP=6;RA=1.115;ISTP=-1;PRIOR=false;SR=1;GENE=LOC102723944	.	.	.	.	0.00793651	.	.
6	1532181	TSD=AG;ASSESS=5;INTERNAL=FOXCUT,PROMOTER;SVTYPE=LINE1;SVLEN=6016;MEINFO=L1Ta,2,6018,-;DIFF=0.11:n1-5649,c5670a,t5700g,g5864t,c5878a,g5881t,t5933a,n5941,g5944t;LP=41;RP=25;RA=0.714;ISTP=0;PRIOR=false;SR=11;AF=0.000450315;AC=3	.	.	.	0.000450315	.	.	.
6	1997523	TSD=null;ASSESS=4;INTERNAL=GMDS,INTRONIC;SVTYPE=LINE1;SVLEN=6019;MEINFO=L1Ta1d,0,6019,+;DIFF=0.03:n1-2,t133c,n230,t231c,t254a,n321-6019;LP=13;RP=1;RA=3.7;ISTP=-1;PRIOR=false;SR=1;AF=0.00030021;AC=2	.	.	.	0.00030021	.	.	.
6	2035226	TSD=ATGAAAGGTG;ASSESS=5;INTERNAL=GMDS,INTRONIC;SVTYPE=LINE1;SVLEN=6019;MEINFO=L1Ta1d,0,6019,+;DIFF=0.08:t231c,t254a,c269t,n323-6019;LP=84;RP=51;RA=0.72;ISTP=0;PRIOR=false;SR=51;AF=0.00105074;AC=7	.	.	.	0.00105074	.	.	.
6	2513687	TSD=null;ASSESS=3;INTERNAL=null,null;SVTYPE=LINE1;SVLEN=6014;MEINFO=L1Ta,4,6018,+;DIFF=0.09:n1-5616,n5642;LP=14;RP=11;RA=0.348;ISTP=0;PRIOR=false;SR=3	0.000998403	0.000716332	.	.	.	.	.
6	2663722	TSD=AAAGAAAAACAGCTAAATG;ASSESS=5;INTERNAL=MYLK4,3_UTR;SVTYPE=LINE1;SVLEN=6019;MEINFO=L1Ta,0,6019,+;DIFF=0.1:n1-5511,a5596t,n5663-5673;LP=60;RP=75;RA=-0.322;ISTP=0;PRIOR=false;SR=76;AF=0.000750525;AC=5	.	.	.	0.000750525	.	.	.
6	5558056	TSD=AGAACTAATTCAAATGG;ASSESS=5;INTERNAL=NM_006567,INTRONIC;SVTYPE=LINE1;SVLEN=6019;MEINFO=L1Ta,0,6019,+;DIFF=0.1:n1-5541,c5622g,n5639,n5692-5697,n5948,n5959-5960,n5962,n5964,n5986;LP=27;RP=16;RA=0.755;ISTP=0;PRIOR=false;SR=16	0.000399361	0.000716332	.	0.000450315	.	0.000869565	.
6	5905786	TSD=AAACATTTCTTCT;ASSESS=5;INTERNAL=null,null;SVTYPE=LINE1;SVLEN=6019;MEINFO=L1Ta1d,0,6019,+;DIFF=0.05:a52t,t231c,t254a,n324,n364-6019;LP=12;RP=1;RA=3.585;ISTP=0;PRIOR=false;SR=11	.	.	.	.	.	0.000869565	.
6	6280580	TSD=TCAAGCCTAGTTTTTT;ASSESS=5;INTERNAL=NM_000129,INTRONIC;SVTYPE=LINE1;SVLEN=6016;MEINFO=L1Ta1d,3,6019,-;DIFF=0.14:n1-3,g210c,t231c,t254a,a388g,n575-6019;LP=8;RP=19;RA=-1.248;ISTP=0;PRIOR=false;SR=15	0.000599042	0.000716332	.	0.00435305	.	.	.
6	6598231	TSD=TAGCAGATTTTTTT;ASSESS=5;INTERNAL=LY86,INTRONIC;SVTYPE=LINE1;SVLEN=6019;MEINFO=L1Ta1d,0,6019,-;DIFF=0.08:t231c,t254a,c324a,n382,n419-6019;LP=13;RP=11;RA=0.241;ISTP=0;PRIOR=false;SR=5;AF=0.000150105;AC=1	.	.	.	0.000150105	.	.	.
6	7509134	TSD=GAAAGTCAACTAGAAGC;ASSESS=5;INTERNAL=null,null;SVTYPE=LINE1;SVLEN=6019;MEINFO=L1Ta1d,0,6019,+;DIFF=0.05:n336-6019;LP=12;RP=1;RA=3.585;ISTP=0;PRIOR=false;SR=4	.	.	.	.	.	0.000869565	.
6	7742937	TSD=TATCCCACTTAAATTTT;ASSESS=5;INTERNAL=BMP6,INTRONIC;SVTYPE=LINE1;SVLEN=6017;MEINFO=L1Ta,2,6019,-;DIFF=0.11:n1-5613,c5748g,g5766t,g5770t,c5773a,c5819a,t5827a,t5832a,g5834t;LP=16;RP=16;RA=0;ISTP=0;PRIOR=false;SR=14;AF=0.000150105;AC=1	.	.	.	0.000150105	.	.	.
6	8242365	TSD=null;ASSESS=3;INTERNAL=null,null;SVTYPE=LINE1;SVLEN=6019;MEINFO=L1Ta1d,0,6019,+;DIFF=0.09:t231c,t254a,n388-6019;LP=25;RP=7;RA=1.837;ISTP=0;PRIOR=false;SR=4;GENE=LOC105374910;AF=0.000399361;AC=2	0.000399361	.	.	.	.	.	.
6	8242397	TSD=null;ASSESS=4;INTERNAL=null,null;SVTYPE=LINE1;SVLEN=6019;MEINFO=L1Ta1d,0,6019,+;DIFF=0.09:t231c,t254a,n389-6019;LP=12;RP=6;RA=1;ISTP=-1;PRIOR=false;SR=2	.	0.000716332	.	.	.	.	.
6	8654075	TSD=AGAAAAAAGTGCTGA;ASSESS=5;INTERNAL=NR_038980,INTRONIC;SVTYPE=LINE1;SVLEN=6018;MEINFO=L1Ta1d,1,6019,+;DIFF=0.11:n1,c144g,t231c,t254a,n421-6019;LP=13;RP=12;RA=0.115;ISTP=0;PRIOR=false;SR=15	0.000199681	0.000716332	.	.	.	.	.
6	9367611	TSD=AATCTGG;ASSESS=5;INTERNAL=null,null;SVTYPE=LINE1;SVLEN=6019;MEINFO=L1Ambig,0,6019,+;DIFF=0.06:n1-3,i73g,c115a,g167a,t231c,t254a,c257t,g352a,n466-6019;LP=19;RP=1;RA=4.248;ISTP=0;PRIOR=false;SR=5	0.000199681	0.000716332	.	.	.	.	.
6	9735205	TSD=CTTATTTTTTCT;ASSESS=5;INTERNAL=null,null;SVTYPE=LINE1;SVLEN=6017;MEINFO=L1Ta1d,2,6019,-;DIFF=0.11:t231c,t254a,n457-6019;LP=8;RP=16;RA=-1;ISTP=0;PRIOR=false;SR=11	0.000599042	0.000716332	.	0.00345242	.	.	.
6	9916818	TSD=AAAATAATTCTTACA;ASSESS=5;INTERNAL=null,null;SVTYPE=LINE1;SVLEN=6019;MEINFO=L1Ambig,0,6019,+;DIFF=0.1:n1-3,i73g,c115a,g167a,t231c,t254a,c257t,g352a,n442-6019;LP=13;RP=9;RA=0.531;ISTP=0;PRIOR=false;SR=10;GENE=LOC107983965;AF=0.000199681;AC=1	0.000199681	.	.	.	.	.	.
6	10100295	TSD=null;ASSESS=3;INTERNAL=null,null;SVTYPE=LINE1;SVLEN=6017;MEINFO=L1Ta1d,1,6018,-;DIFF=0.05:n276,n295-6019;LP=8;RP=4;RA=1;ISTP=-1;PRIOR=false;SR=1	.	.	.	.	.	0.000869565	.
6	10100306	TSD=AAAAAACATGA;ASSESS=5;INTERNAL=null,null;SVTYPE=LINE1;SVLEN=6019;MEINFO=L1Ta1d,0,6019,+;DIFF=0.11:n436-6019;LP=66;RP=43;RA=0.618;ISTP=0;PRIOR=false;SR=51	0.00119808	0.00286533	.	0.00330231	.	.	.
6	10247246	TSD=AAGAAAGAGTGACGGATTCGC;ASSESS=5;INTERNAL=null,null;SVTYPE=LINE1;SVLEN=6016;MEINFO=L1Ta1d,2,6018,+;DIFF=0.09:n1,t231c,t254a,n451-678,c686a,n689,n702-703,n707,n709-710,c714a,n726,n732,n738,n740,n748,n762,n767,n772,n774,n778,n787,n792,n795,n798,n804,n820-6019;LP=29;RP=14;RA=1.051;ISTP=0;PRIOR=false;SR=7;AF=0.000199681;AC=1	0.000199681	.	.	.	.	.	.
6	10284241	TSD=AAGAAGATCCACCT;ASSESS=5;INTERNAL=null,null;SVTYPE=LINE1;SVLEN=6007;MEINFO=L1Ta1d,12,6019,+;DIFF=0.1:n1-12,t231c,t254a,a423g,n453-6019;LP=22;RP=11;RA=1;ISTP=0;PRIOR=false;SR=12	0.000399361	0.000716332	.	.	.	.	.
6	10478034	TSD=ACCAGTTTACATTTTCA;ASSESS=5;INTERNAL=null,null;SVTYPE=LINE1;SVLEN=6015;MEINFO=L1Ta1d,3,6018,+;DIFF=0.1:n1-2,t231c,t254a,n619-6019;LP=21;RP=23;RA=-0.131;ISTP=0;PRIOR=false;SR=20;GENE=LOC101928106;AF=0.000199681;AC=1	0.000199681	.	.	.	.	.	.
6	10891207	TSD=TTACTTCTACTTTAT;ASSESS=5;INTERNAL=NM_001040274,INTRONIC;SVTYPE=LINE1;SVLEN=6017;MEINFO=L1Ta1d,2,6019,-;DIFF=0.12:n1,t149c,t231c,t254a,n480-6019;LP=9;RP=19;RA=-1.078;ISTP=0;PRIOR=false;SR=11	0.000399361	0.000716332	.	.	.	.	.
6	13190801	TSD=AGAATTCAAAATACAAGG;ASSESS=5;INTERNAL=NM_030948,INTRONIC;SVTYPE=LINE1;SVLEN=6017;MEINFO=L1Ta1d,2,6019,+;DIFF=0.09:n1,t231c,t254a,n318-343,n346,n384,n411,n494-6019;LP=3448;RP=4448;RA=-0.367;ISTP=0;PRIOR=false;SR=3490	0.272364	0.25	0.443345	0.131942	0.277778	0.24087	.
6	13485557	TSD=AAGATCAAGCAACCT;ASSESS=5;INTERNAL=NM_001242629,INTRONIC;SVTYPE=LINE1;SVLEN=6017;MEINFO=L1Ta1d,2,6019,+;DIFF=0.06:n1-2,t231c,t254a,c327t,n357,n372,n492-6019;LP=39;RP=1;RA=5.285;ISTP=0;PRIOR=false;SR=26	0.000199681	.	.	.	.	0.00173913	.
6	14023073	TSD=null;ASSESS=3;INTERNAL=null,null;SVTYPE=LINE1;SVLEN=6017;MEINFO=L1Ta1d,1,6018,+;DIFF=0.11:t231c,t254a,c324a,n462-6019;LP=35;RP=29;RA=0.271;ISTP=0;PRIOR=false;SR=17;AF=0.000399361;AC=2	0.000399361	.	.	0.00030021	.	.	.
6	14432419	TSD=CATATTTTATTTCTT;ASSESS=5;INTERNAL=null,null;SVTYPE=LINE1;SVLEN=6018;MEINFO=L1Ta1d,1,6019,-;DIFF=0.13:g167a,t231c,t254a,c324a,c529a,n588-6019;LP=34;RP=72;RA=-1.082;ISTP=0;PRIOR=false;SR=47;GENE=LOC105374942;AF=0.000798722;AC=4	0.000798722	.	.	0.00090063	.	.	.
6	14591873	TSD=GAAGATTCCTTCTTT;ASSESS=5;INTERNAL=null,null;SVTYPE=LINE1;SVLEN=6016;MEINFO=L1Ta1d,3,6019,-;DIFF=0.1:n1-2,t231c,t254a,c327t,n365-390,n541-6019;LP=7;RP=15;RA=-1.1;ISTP=0;PRIOR=false;SR=9	0.000199681	0.000716332	.	.	.	0.000869565	.
6	15868460	TSD=AAAATACAGTTCT;ASSESS=5;INTERNAL=DTNBP1,PROMOTER;SVTYPE=LINE1;SVLEN=6016;MEINFO=L1Ambig,3,6019,+;DIFF=0.1:n1-3,g38a,i72c,g83c,t153c,t231c,t254a,g313a,g352a,n364-6019;LP=37;RP=38;RA=-0.038;ISTP=0;PRIOR=false;SR=28;AF=0.000450315;AC=3	.	.	.	0.000450315	.	.	.
6	16134940	TSD=CAAGGAAGGTTTTT;ASSESS=5;INTERNAL=NM_013262,INTRONIC;SVTYPE=LINE1;SVLEN=6014;MEINFO=L1Ta1d,5,6019,-;DIFF=0.08:n1-3,t231c,t254a,c327t,n331-6019;LP=5;RP=12;RA=-1.263;ISTP=0;PRIOR=false;SR=13	0.000199681	.	.	.	.	0.000869565	.
6	18571548	TSD=AGAACTTATTCTTTT;ASSESS=5;INTERNAL=NR_030312,PROMOTER;SVTYPE=LINE1;SVLEN=6016;MEINFO=L1Ta1d,3,6019,-;DIFF=0.12:n1-2,t231c,t254a,n387,a423g,n442-6019;LP=13;RP=11;RA=0.241;ISTP=0;PRIOR=false;SR=15;GENE=LOC105374956;AF=0.000199681;AC=1	0.000199681	.	.	.	.	.	.
6	18799661	TSD=TGTAAATATATTTTCTT;ASSESS=5;INTERNAL=null,null;SVTYPE=LINE1;SVLEN=6016;MEINFO=L1Ta1d,3,6019,-;DIFF=0.1:n1-2,t231c,t254a,n373-390,a423g,n541-6019;LP=9;RP=25;RA=-1.474;ISTP=0;PRIOR=false;SR=14;AF=0.000199681;AC=1	0.000199681	.	.	.	.	.	.
6	19321155	TSD=TCTTCTACACAGTTTT;ASSESS=5;INTERNAL=null,null;SVTYPE=LINE1;SVLEN=6018;MEINFO=L1Ta1d,1,6019,-;DIFF=0.11:t231c,t254a,c324a,n450-6019;LP=62;RP=91;RA=-0.554;ISTP=0;PRIOR=false;SR=61	0.000998403	0.00358166	.	0.00165116	.	.	.
6	19792898	TSD=AGAAATAAGAGTATC;ASSESS=5;INTERNAL=null,null;SVTYPE=LINE1;SVLEN=6017;MEINFO=L1Ambig,2,6019,+;DIFF=0.12:n1-2,i73g,c115a,c143t,g167a,t231c,t254a,c257t,g352a,n567-6019;LP=187;RP=111;RA=0.752;ISTP=0;PRIOR=false;SR=146	0.0153754	0.00931232	0.00044964	0.002852	0.00793651	0.0156522	.
6	20092986	TSD=CTTGTAGATTGATTTTT;ASSESS=5;INTERNAL=NM_001080480,TERMINATOR;SVTYPE=LINE1;SVLEN=6019;MEINFO=L1Ta1d,0,6019,-;DIFF=0.11:t231c,t254a,n532-6019;LP=75;RP=180;RA=-1.263;ISTP=0;PRIOR=false;SR=143	0.0071885	0.00716332	.	0.0204143	.	0.000869565	.
6	20555492	TSD=CGCTCAGCTAATTTTT;ASSESS=5;INTERNAL=CDKAL1,INTRONIC;SVTYPE=LINE1;SVLEN=6017;MEINFO=L1Ta1d,2,6019,-;DIFF=0.08:n1-2,t231c,t254a,c327t,n425-6019;LP=6;RP=11;RA=-0.874;ISTP=0;PRIOR=false;SR=10;GENE=CDKAL1	.	.	0.00044964	.	.	.	.
6	23510630	TSD=TACATTTATTATCTT;ASSESS=5;INTERNAL=NRSN1,PROMOTER;SVTYPE=LINE1;SVLEN=6017;MEINFO=L1Ta,2,6019,-;DIFF=0.08:n1-5694;LP=11;RP=7;RA=0.652;ISTP=0;PRIOR=false;SR=15;AF=0.000150105;AC=1	.	.	.	0.000150105	.	.	.
6	23903475	TSD=GAAAATCACATCAGCC;ASSESS=5;INTERNAL=null,null;SVTYPE=LINE1;SVLEN=6018;MEINFO=L1Ambig,1,6019,+;DIFF=0.07:n1-3,i73g,c115a,g167a,t231c,t254a,c257t,n345-6019;LP=12;RP=3;RA=2;ISTP=0;PRIOR=false;SR=12	.	.	.	.	.	0.000869565	.
6	24817987	TSD=TTTTTTTTT;ASSESS=5;INTERNAL=NM_001286445,INTRONIC;SVTYPE=LINE1;SVLEN=6014;MEINFO=L1Ambig,4,6018,+;DIFF=0.05:n1-3,i73g,c164t,t231c,t254a,n264-6019;LP=7;RP=17;RA=-1.28;ISTP=0;PRIOR=false;SR=34	.	.	0.492806	0.429301	.	0.363478	.
6	24889650	TSD=TAAAATATATATATTTTA;ASSESS=5;INTERNAL=FAM65B,INTRONIC;SVTYPE=LINE1;SVLEN=6017;MEINFO=L1Ta1d,2,6019,-;DIFF=0.1:n1,t231c,t254a,c324a,n409-6019;LP=45;RP=54;RA=-0.263;ISTP=0;PRIOR=false;SR=72;AF=0.00060042;AC=4	.	.	.	0.00060042	.	.	.
6	25189563	TSD=ACATTGCCTGCTTTCT;ASSESS=5;INTERNAL=null,null;SVTYPE=LINE1;SVLEN=6018;MEINFO=L1Ta1d,1,6019,-;DIFF=0.1:n463-6019;LP=8;RP=21;RA=-1.392;ISTP=0;PRIOR=false;SR=13;AF=0.000199681;AC=1	0.000199681	.	.	.	.	.	.
6	27972756	TSD=AATAATTTCAATTTT;ASSESS=5;INTERNAL=null,null;SVTYPE=LINE1;SVLEN=6017;MEINFO=L1Ta1d,2,6019,-;DIFF=0.09:n1-2,t231c,t254a,c327t,c339a,n361-372,n423,n473,n516,n523-6019;LP=13;RP=23;RA=-0.823;ISTP=0;PRIOR=false;SR=16;AF=0.000199681;AC=1	0.000199681	.	.	.	.	.	.
6	27988267	TSD=TATATATATA;ASSESS=5;INTERNAL=null,null;SVTYPE=LINE1;SVLEN=6019;MEINFO=L1Ta1d,0,6019,+;DIFF=0.12:c144g,t231c,t254a,n492-6019;LP=122;RP=68;RA=0.843;ISTP=0;PRIOR=false;SR=68	0.00778754	0.00716332	.	0.0103573	.	.	.
6	29267615	TSD=AAAAACACACTTCAG;ASSESS=5;INTERNAL=null,null;SVTYPE=LINE1;SVLEN=6018;MEINFO=L1Ta1d,1,6019,+;DIFF=0.11:t231c,t254a,n488-6019;LP=19;RP=30;RA=-0.659;ISTP=0;PRIOR=false;SR=35	0.000798722	0.00143266	.	.	.	.	.
6	29895387	TSD=TTTTTTTTTTTTTTTTTT;ASSESS=5;INTERNAL=NR_001434,TERMINATOR;SVTYPE=LINE1;SVLEN=6019;MEINFO=L1Ta1d,0,6019,+;DIFF=0.06:n1-4,t231c,t254a,c324a,n421-6019;LP=376;RP=23;RA=4.031;ISTP=0;PRIOR=false;SR=121	0.203407	0.167894	0.0677889	.	.	.	.
6	29952260	TSD=null;ASSESS=4;INTERNAL=NM_001242758,TERMINATOR;SVTYPE=LINE1;SVLEN=6019;MEINFO=L1Ta1d,0,6019,+;DIFF=0.07:t231c,t254a,c324a,n342-6019;LP=45;RP=8;RA=2.492;ISTP=-1;PRIOR=false;SR=4	.	.	.	.	0.015873	.	.
6	29952446	TSD=AAAAAACACAG;ASSESS=5;INTERNAL=NM_001242758,TERMINATOR;SVTYPE=LINE1;SVLEN=6019;MEINFO=L1Ta1d,0,6019,+;DIFF=0.07:t231c,t254a,n305-309,c324a,n460-475,n481,n486,n489,n494,n496,n508,n522-524,c529a,n536-537,n541,n546,n553,n563,n570,n572,n575-577,n580,n587,n589-590,n606,n626-6019;LP=277;RP=246;RA=0.171;ISTP=0;PRIOR=false;SR=217	0.0233626	0.0329513	0.0296763	0.0252177	.	0.0286957	.
6	32489502	TSD=null;ASSESS=3;INTERNAL=null,null;SVTYPE=LINE1;SVLEN=6009;MEINFO=L1Ambig,9,6018,+;DIFF=0.12:n1-5555,c5621t,g5641a,a5712g,t5728c,g5729t,t5737a,a5771g,c5781g,t5804g,a5820t,t5827a,t5850c,a5851c,g5870t,c5878g,g5883a,g5886a,g5903a,g5905t,t5909c,g5923a,c5928t,a5929g,c5930a,a5931g,g5935a,g5946a,a5989t,g6014a,n6018-6019;LP=4635;RP=4119;RA=0.17;ISTP=0;PRIOR=false;SR=1488	0.297374	0.302657	0.356262	.	0.367925	0.305732	.
6	32621790	TSD=AATTTATAGATGGTA;ASSESS=5;INTERNAL=null,null;SVTYPE=LINE1;SVLEN=6013;MEINFO=L1Ambig,6,6019,+;DIFF=0.1:n1-6,i73g,t78c,t231c,t254a,n338-466,g524a,n617-6019;LP=3497;RP=2491;RA=0.489;ISTP=0;PRIOR=false;SR=3441	0.115815	0.126074	0.245953	0.09997	0.15873	0.114783	.
6	38034988	TSD=TGTGCTGTT;ASSESS=5;INTERNAL=ZFAND3,INTRONIC;SVTYPE=LINE1;SVLEN=6015;MEINFO=L1Ta1d,4,6019,-;DIFF=0.1:n1-3,t231c,t254a,n265,a423g,n523-6019;LP=16;RP=21;RA=-0.392;ISTP=0;PRIOR=false;SR=22;AF=0.000150105;AC=1	.	.	.	0.000150105	.	.	.
6	38323512	TSD=null;ASSESS=3;INTERNAL=BTBD9,INTRONIC;SVTYPE=LINE1;SVLEN=6015;MEINFO=L1Ta1d,3,6018,+;DIFF=0.08:n1-2,t231c,t254a,c327t,n365-6019;LP=24;RP=6;RA=2;ISTP=0;PRIOR=false;SR=5;AF=0.000150105;AC=1	.	.	.	0.000150105	.	.	.
6	38626996	TSD=AAGTATACATATTTT;ASSESS=5;INTERNAL=NM_001099272,INTRONIC;SVTYPE=LINE1;SVLEN=6019;MEINFO=L1Ta1d,0,6019,-;DIFF=0.11:t231c,t254a,c324a,n481-6019;LP=8;RP=20;RA=-1.322;ISTP=0;PRIOR=false;SR=13;GENE=BTBD9;AF=0.000199681;AC=1	0.000199681	.	.	.	.	.	.
6	38732694	TSD=CAAATCCCTTTTTTTCTTT;ASSESS=5;INTERNAL=NM_001206927,INTRONIC;SVTYPE=LINE1;SVLEN=6017;MEINFO=L1Ta,2,6019,-;DIFF=0.12:n1-5518,a5596t,n5807,g5845c,n5872,g5879t;LP=22;RP=13;RA=0.759;ISTP=0;PRIOR=false;SR=15;GENE=DNAH8;AF=0.000199681;AC=1	0.000199681	.	.	.	.	.	.
6	38771140	TSD=CTCATTTAGGTATTCTT;ASSESS=5;INTERNAL=NM_001206927,INTRONIC;SVTYPE=LINE1;SVLEN=6015;MEINFO=L1Ta1d,4,6019,-;DIFF=0.05:n1-2,t231c,t254a,n329,n334-336,n366,n368-6019;LP=1;RP=11;RA=-3.459;ISTP=0;PRIOR=false;SR=10	.	.	.	.	.	0.000869565	.
6	40034960	TSD=CTGTGTGCTAGACATTCT;ASSESS=5;INTERNAL=MOCS1,PROMOTER;SVTYPE=LINE1;SVLEN=6015;MEINFO=L1Ta1d,4,6019,-;DIFF=0.07:n1-2,t231c,t254a,n365,n370-6019;LP=6;RP=59;RA=-3.298;ISTP=0;PRIOR=false;SR=47;AF=0.00060042;AC=4	.	.	.	0.00060042	.	.	.
6	40620918	TSD=AACAGTCGATATTTA;ASSESS=5;INTERNAL=null,null;SVTYPE=LINE1;SVLEN=6007;MEINFO=L1Ta1d,12,6019,-;DIFF=0.08:n1-12,c144g,t231c,t254a,n363,n365,n368,n398-6019;LP=17;RP=53;RA=-1.64;ISTP=0;PRIOR=false;SR=54	.	.	.	.	.	0.00347826	.
6	40689535	TSD=AAGTCACTTCAGTT;ASSESS=5;INTERNAL=null,null;SVTYPE=LINE1;SVLEN=6012;MEINFO=L1Ta1d,7,6019,+;DIFF=0.07:n1-32,c37a,t231c,g252c,t254a,g285a,n339-6019;LP=16;RP=1;RA=4;ISTP=0;PRIOR=false;SR=8	.	.	.	.	.	0.000869565	.
6	41334577	TSD=AAATAATGCTTGTG;ASSESS=5;INTERNAL=NM_001199509,PROMOTER;SVTYPE=LINE1;SVLEN=6019;MEINFO=L1Ta1d,0,6019,+;DIFF=0.1:c144g,t231c,t254a,n482-6019;LP=23;RP=8;RA=1.524;ISTP=0;PRIOR=false;SR=15;AF=0.000199681;AC=1	0.000199681	.	.	.	.	.	.
6	42973572	TSD=AAAAATGTACACAGGC;ASSESS=5;INTERNAL=NM_000287,INTRONIC;SVTYPE=LINE1;SVLEN=6003;MEINFO=L1Ta1d,15,6018,-;DIFF=0.11:n1-14,t231c,t254a,g364a,n448-544,n675-678,n699-1321,g1617a,n1621-6019;LP=22;RP=15;RA=0.553;ISTP=0;PRIOR=false;SR=13	0.000199681	0.000716332	.	.	.	.	.
6	43059594	TSD=null;ASSESS=4;INTERNAL=KLC4,INTRONIC;SVTYPE=LINE1;SVLEN=6017;MEINFO=L1Ambig,1,6018,+;DIFF=0.06:n1-4485,g4535a,n4563-4684,t4721c,n4761-4764,n4841-4977,a5006c,g5022c,t5036c,n5041,c5066t,n5068,c5083t,a5092g,c5093a,n5099,n5104-5205,c5231a,a5242g,n5266-5295,t5316a,t5325c,n5350-5436,c5502t,c5508a,n5513-5564,c5585t,t5636c,n5641-6019;LP=22;RP=23;RA=-0.064;ISTP=-1;PRIOR=false;SR=3	.	.	.	.	.	.	0.000372871
6	44118388	TSD=TGTCATATATCATTTT;ASSESS=5;INTERNAL=NM_032111,INTRONIC;SVTYPE=LINE1;SVLEN=6019;MEINFO=L1Ta1d,0,6019,-;DIFF=0.12:g210c,t231c,t254a,a388g,n463-6019;LP=19;RP=35;RA=-0.881;ISTP=0;PRIOR=false;SR=26	.	0.00143266	.	.	.	.	.
6	44579145	TSD=TGCACTTTTCTTTTAT;ASSESS=5;INTERNAL=null,null;SVTYPE=LINE1;SVLEN=6019;MEINFO=L1Ta1d,0,6019,-;DIFF=0.1:n1-2,t231c,t254a,c327t,n492-6019;LP=19;RP=49;RA=-1.367;ISTP=0;PRIOR=false;SR=33	0.000199681	0.00143266	.	.	.	.	.
6	45154088	TSD=AAAAAAAAAAAAAAAA;ASSESS=5;INTERNAL=SUPT3H,INTRONIC;SVTYPE=LINE1;SVLEN=6015;MEINFO=L1Ta1d,3,6018,-;DIFF=0.1:n1-2,t231c,t254a,n361,n377,a404t,n431-730,c771a,c811t,c833a,t847c,n882-6019;LP=14;RP=4;RA=1.807;ISTP=0;PRIOR=false;SR=9;AF=0.361453;AC=2408	.	.	.	0.361453	.	.	.
6	45325354	TSD=AAGAAAATAAAAAAT;ASSESS=5;INTERNAL=SUPT3H,INTRONIC;SVTYPE=LINE1;SVLEN=6017;MEINFO=L1Ta1d,2,6019,+;DIFF=0.07:n1-2,c12a,t231c,t254a,n319,n431-6019;LP=12;RP=6;RA=1;ISTP=0;PRIOR=false;SR=7;AF=0.000150105;AC=1	.	.	.	0.000150105	.	.	.
6	45358099	TSD=AAAAAAGAGAGACAGGA;ASSESS=5;INTERNAL=NM_001024630,INTRONIC;SVTYPE=LINE1;SVLEN=6019;MEINFO=L1Ta,0,6019,+;DIFF=0.11:n1-5534,n5538,n5540,n5542,n5544-5548,n5552-5556,a5557c,n5559-5559,n5561,n5563,n5566-5567,n5569,n5571,n5574,n5837;LP=502;RP=307;RA=0.709;ISTP=0;PRIOR=false;SR=379	0.0119808	0.017192	.	0.0453317	0.00793651	0.00521739	.
6	45789242	TSD=null;ASSESS=3;INTERNAL=null,null;SVTYPE=LINE1;SVLEN=6010;MEINFO=L1Ta1d,8,6018,+;DIFF=0.08:n1-7,c37t,g61a,t231c,t254a,n364-6019;LP=18;RP=4;RA=2.17;ISTP=0;PRIOR=false;SR=2	.	.	.	.	.	0.000869565	.
6	45821819	TSD=GGGGTTTTC;ASSESS=5;INTERNAL=CLIC5,TERMINATOR;SVTYPE=LINE1;SVLEN=6015;MEINFO=L1Ta1d,4,6019,-;DIFF=0.08:n1-3,a52t,t231c,t254a,n321-6019;LP=30;RP=66;RA=-1.138;ISTP=0;PRIOR=false;SR=49;AF=0.00060042;AC=4	.	.	.	0.00060042	.	.	.
6	45966340	TSD=AAAAACTGGAATGCC;ASSESS=5;INTERNAL=NM_001256023,INTRONIC;SVTYPE=LINE1;SVLEN=6018;MEINFO=L1Ta1d,1,6019,+;DIFF=0.09:n1,t231c,t254a,a423g,n520-6019;LP=151;RP=82;RA=0.881;ISTP=0;PRIOR=false;SR=117	0.00539137	0.00501433	.	0.018613	0.00793651	.	.
6	46144120	TSD=TATATTTACCTTT;ASSESS=5;INTERNAL=ENPP4,3_UTR;SVTYPE=LINE1;SVLEN=6018;MEINFO=L1Ta,1,6019,-;DIFF=0.06:n1-5260,g5268a,t5272a,n5274,n5281-5282,c5288a,c5292t,t5316a,t5325c,t5328c,n5340,n5352-5421,n5435,c5464t,t5535g,g5538t,n5573-5754,t5757a,n5761,t5762a,n5766-5766,c5767a,n5770-5770,c5773a,c5780a,c5781a,n5785,c5788a,n5790,n5795-5796,n5800,t5804a,n5806-5807,n5809,g5810a,n5811-5811,t5815a,g5816a,c5819…	.	.	.	0.000150105	.	.	.
6	46247227	TSD=GGGTTTGCATTTCT;ASSESS=5;INTERNAL=NM_001251973,INTRONIC;SVTYPE=LINE1;SVLEN=6018;MEINFO=L1Ta1d,1,6019,-;DIFF=0.11:n1,t231c,t254a,n405-485,n636-6019;LP=12;RP=19;RA=-0.663;ISTP=0;PRIOR=false;SR=12;GENE=RCAN2;AF=0.000199681;AC=1	0.000199681	.	.	.	.	.	.
6	46277420	TSD=AAAAGAAGGTGTTG;ASSESS=5;INTERNAL=NR_125838,INTRONIC;SVTYPE=LINE1;SVLEN=6014;MEINFO=L1Ta1d,4,6018,+;DIFF=0.08:n1-3,t82g,t231c,g252a,t254a,t290g,t376g,n530-6019;LP=85;RP=3;RA=4.824;ISTP=0;PRIOR=false;SR=9;GENE=RCAN2;AF=0.000998403;AC=5	0.000998403	.	.	.	.	.	.
6	46891196	TSD=AAGAATGCGG;ASSESS=5;INTERNAL=NM_015234,INTRONIC;SVTYPE=LINE1;SVLEN=6015;MEINFO=L1Ta1d,4,6019,+;DIFF=0.1:n1-4,i62atcccagcgtgagct,t231c,t254a,c255t,n419-6019;LP=83;RP=45;RA=0.883;ISTP=0;PRIOR=false;SR=41;GENE=ADGRF5;AF=0.000798722;AC=4	0.000798722	.	.	0.00180126	.	.	.
6	47094839	TSD=CAATCTACAGGTTTCT;ASSESS=5;INTERNAL=ADGRF1,PROMOTER;SVTYPE=LINE1;SVLEN=6019;MEINFO=L1Ta1d,0,6019,-;DIFF=0.1:g167a,t231c,t254a,c324a,n359-6019;LP=24;RP=32;RA=-0.415;ISTP=0;PRIOR=false;SR=27;AF=0.00030021;AC=2	.	.	.	0.00030021	.	.	.
6	47110319	TSD=AAAAATTACCCAGGC;ASSESS=5;INTERNAL=null,null;SVTYPE=LINE1;SVLEN=6018;MEINFO=L1Ta1d,1,6019,+;DIFF=0.1:n1,c37a,t231c,g252c,t254a,g285a,n323,n333,n335,n343,n361,c363t,n373,n387,g434a,n500,n538-6019;LP=35;RP=19;RA=0.881;ISTP=0;PRIOR=false;SR=17;AF=0.000399361;AC=2	0.000399361	.	.	0.00120084	.	.	.
6	47185914	TSD=AAGAACTCTTTTC;ASSESS=5;INTERNAL=TNFRSF21,TERMINATOR;SVTYPE=LINE1;SVLEN=6017;MEINFO=L1Ta1d,2,6019,+;DIFF=0.11:n1-2,t231c,t254a,n394-6019;LP=14;RP=11;RA=0.348;ISTP=0;PRIOR=false;SR=9;AF=0.000150105;AC=1	.	.	.	0.000150105	.	.	.
6	47690638	TSD=GTATTTAAAAGTTT;ASSESS=5;INTERNAL=NM_153839,INTRONIC;SVTYPE=LINE1;SVLEN=6017;MEINFO=L1Ta1d,2,6019,-;DIFF=0.12:n1-2,t231c,t254a,t261c,n476-6019;LP=13;RP=21;RA=-0.692;ISTP=0;PRIOR=false;SR=16;GENE=ADGRF2;AF=0.000199681;AC=1	0.000199681	.	.	.	.	.	.
6	47779394	TSD=CCCTTATACACTTT;ASSESS=5;INTERNAL=NM_181744,PROMOTER;SVTYPE=LINE1;SVLEN=6018;MEINFO=L1Ta1d,1,6019,-;DIFF=0.05:n1,a109t,t231c,t254a,n319-6019;LP=1;RP=12;RA=-3.585;ISTP=0;PRIOR=false;SR=5	.	.	.	.	.	0.000869565	.
6	47815103	TSD=GAAAAGTTGGATTTC;ASSESS=5;INTERNAL=NR_033806,INTRONIC;SVTYPE=LINE1;SVLEN=6018;MEINFO=L1Ta1d,1,6019,+;DIFF=0.1:n1,t231c,t254a,n385-6019;LP=12;RP=10;RA=0.263;ISTP=0;PRIOR=false;SR=11;GENE=OPN5;AF=0.000199681;AC=1	0.000199681	.	.	.	.	.	.
6	47899208	TSD=CATAGTTAGATATTTCTT;ASSESS=5;INTERNAL=PTCHD4,INTRONIC;SVTYPE=LINE1;SVLEN=6010;MEINFO=L1Ambig,9,6019,-;DIFF=0.06:n1-7,i73g,c115a,c143t,g167a,t231c,t254a,c257t,n305-6019;LP=3;RP=9;RA=-1.585;ISTP=0;PRIOR=false;SR=5;AF=0.000150105;AC=1	.	.	.	0.000150105	.	.	.
6	48448205	TSD=AAAAATTATTCC;ASSESS=5;INTERNAL=null,null;SVTYPE=LINE1;SVLEN=6012;MEINFO=L1Ta1d,7,6019,+;DIFF=0.12:n1-7,t231c,t254a,c327t,n572-6019;LP=14;RP=13;RA=0.107;ISTP=0;PRIOR=false;SR=6;AF=0.000199681;AC=1	0.000199681	.	.	.	.	.	.
6	50269454	TSD=CGAGAATTCACTCTCT;ASSESS=5;INTERNAL=DEFB112,PROMOTER;SVTYPE=LINE1;SVLEN=6016;MEINFO=L1Ta1d,3,6019,-;DIFF=0.03:n1-33,n37,g61a,t231c,t254a,n267,a275t,t337a,g352a,n379-6019;LP=1;RP=4;RA=-2;ISTP=0;PRIOR=false;SR=4	.	.	0.00044964	.	.	.	.
6	50535754	TSD=AAGAGAGTGATTCAG;ASSESS=5;INTERNAL=null,null;SVTYPE=LINE1;SVLEN=6018;MEINFO=L1Ta,1,6019,+;DIFF=0.13:n1-5508,c5878g;LP=26;RP=12;RA=1.115;ISTP=0;PRIOR=false;SR=15	0.000199681	0.000716332	.	.	.	.	.
6	51749465	TSD=AAAAATACAATGATTCAGC;ASSESS=5;INTERNAL=PKHD1,INTRONIC;SVTYPE=LINE1;SVLEN=6010;MEINFO=L1Ta1d,9,6019,+;DIFF=0.05:n1-8,t231c,t254a,n409-6019;LP=14;RP=1;RA=3.807;ISTP=0;PRIOR=false;SR=2;AF=0.000150105;AC=1	.	.	.	0.000150105	.	.	.
6	57423045	TSD=TGATTTTT;ASSESS=5;INTERNAL=NM_000947,INTRONIC;SVTYPE=LINE1;SVLEN=6013;MEINFO=L1Ta1d,6,6019,-;DIFF=0.11:n1-5,t231c,t254a,n393-6019;LP=18;RP=32;RA=-0.83;ISTP=0;PRIOR=false;SR=29;GENE=PRIM2;AF=0.000399361;AC=2	0.000399361	.	.	.	.	.	.
6	57444898	TSD=GGGGTGGCAGATTTTT;ASSESS=5;INTERNAL=NM_000947,INTRONIC;SVTYPE=LINE1;SVLEN=6014;MEINFO=L1Ambig,4,6018,-;DIFF=0.02:n1-3,i73g,n138-145,n151,c155t,n159,c160t,n162-162,n164-166,n201-6019;LP=1;RP=6;RA=-2.585;ISTP=0;PRIOR=false;SR=4;GENE=PRIM2	.	.	.	.	0.00793651	.	.
6	60232239	TSD=null;ASSESS=4;INTERNAL=null,null;SVTYPE=LINE1;SVLEN=6014;MEINFO=L1Ta,4,6018,-;DIFF=0.09:n1-4817,c5109t,n5146-5687,g5883a;LP=7;RP=10;RA=-0.515;ISTP=0;PRIOR=false;SR=4;AF=0.000199681;AC=1	0.000199681	.	.	.	.	.	.
6	60820807	TSD=null;ASSESS=2;INTERNAL=null,null;SVTYPE=LINE1;SVLEN=6015;MEINFO=L1Ambig,3,6018,+;DIFF=0.05:n1-2,c20a,a29g,g55c,i73g,g103a,a117t,t149g,n153-271,c293t,g313a,c317t,c345g,c351t,c369t,a373g,g378a,g397a,c399t,n422-6019;LP=1;RP=25;RA=-4.644;ISTP=-1;PRIOR=false;SR=0;AF=0.000199681;AC=1	0.000199681	.	.	.	.	.	.
6	62658302	TSD=TAAAGAGAAACA;ASSESS=5;INTERNAL=null,null;SVTYPE=LINE1;SVLEN=6019;MEINFO=L1Ta1d,0,6019,+;DIFF=0.12:g53a,c90t,t231c,t254a,c324a,n404-420,n460,c529a,n573,n619-6019;LP=3509;RP=2288;RA=0.617;ISTP=0;PRIOR=false;SR=3538	0.145767	0.138252	0.291367	0.0815071	0.222222	0.196522	.
6	65639611	TSD=null;ASSESS=4;INTERNAL=EYS,INTRONIC;SVTYPE=LINE1;SVLEN=6018;MEINFO=L1Ta1d,1,6019,+;DIFF=0.09:n1-3,t231c,t254a,c327t,n368-6019;LP=10;RP=9;RA=0.152;ISTP=-1;PRIOR=false;SR=5;AF=0.000150105;AC=1	.	.	.	0.000150105	.	.	.
6	69805717	TSD=AATAAATGTTCACTTTTTC;ASSESS=5;INTERNAL=NM_018368,PROMOTER;SVTYPE=LINE1;SVLEN=6018;MEINFO=L1Ta1d,1,6019,+;DIFF=0.08:n1,t231c,t254a,n502-6019;LP=21;RP=7;RA=1.585;ISTP=0;PRIOR=false;SR=14	0.00159744	0.000716332	.	0.00705494	.	0.00173913	.
6	70305282	TSD=AAGAAAGAAAGTAGG;ASSESS=5;INTERNAL=COL9A1,PROMOTER;SVTYPE=LINE1;SVLEN=6016;MEINFO=L1Ta1d,3,6019,+;DIFF=0.07:n1,t231c,t254a,c308t,n390-6019;LP=14;RP=3;RA=2.222;ISTP=0;PRIOR=false;SR=8;AF=0.000150105;AC=1	.	.	.	0.000150105	.	.	.
6	70451984	TSD=AAAAATCTTTT;ASSESS=5;INTERNAL=NM_001162529,INTRONIC;SVTYPE=LINE1;SVLEN=6012;MEINFO=L1Ambig,7,6019,-;DIFF=0.09:n1-7,i73g,c115a,c143t,g167a,t231c,t254a,c257t,g352a,n427-454,n483,n498,n502,n525,n605-6019;LP=8;RP=16;RA=-1;ISTP=0;PRIOR=false;SR=6;GENE=FAM135A;AF=0.000199681;AC=1	0.000199681	.	.	.	.	.	.
6	71329055	TSD=CAGGAAGTCATTTG;ASSESS=5;INTERNAL=null,null;SVTYPE=LINE1;SVLEN=6016;MEINFO=L1Ambig,3,6019,-;DIFF=0.13:n1-3,i73g,c115a,g167a,t231c,t254a,c257t,g352a,n582-6019;LP=54;RP=122;RA=-1.176;ISTP=0;PRIOR=false;SR=87	0.0081869	0.00429799	.	0.000150105	0.00793651	.	.
6	71622990	TSD=TTAGAAAAACTATT;ASSESS=5;INTERNAL=null,null;SVTYPE=LINE1;SVLEN=6017;MEINFO=L1Ta1d,2,6019,-;DIFF=0.11:n1,g152c,t231c,t254a,n535-6019;LP=9;RP=14;RA=-0.637;ISTP=0;PRIOR=false;SR=12	0.000399361	0.000716332	.	0.000150105	.	.	.
6	71970623	TSD=ATCTGTCGTCACTTTA;ASSESS=5;INTERNAL=NM_014989,INTRONIC;SVTYPE=LINE1;SVLEN=6018;MEINFO=L1Ta1d,1,6019,-;DIFF=0.1:n1,t231c,t254a,n583-6019;LP=6;RP=25;RA=-2.059;ISTP=0;PRIOR=false;SR=12;GENE=RIMS1;AF=0.000199681;AC=1	0.000199681	.	.	.	.	.	.
6	72647176	TSD=GAAAAAGCTGAAAATG;ASSESS=5;INTERNAL=KCNQ5-IT1,INTRONIC;SVTYPE=LINE1;SVLEN=6012;MEINFO=L1Ta,7,6019,+;DIFF=0.07:n1-5660,n5812-5841,n5877-5878,g5935a;LP=30;RP=11;RA=1.447;ISTP=0;PRIOR=false;SR=16;AF=0.00030021;AC=2	.	.	.	0.00030021	.	.	.
6	72708309	TSD=AAGATATGAAATG;ASSESS=5;INTERNAL=NM_019842,INTRONIC;SVTYPE=LINE1;SVLEN=6015;MEINFO=L1Ta1d,3,6018,+;DIFF=0.03:n1-2,t231c,n236-6019;LP=5;RP=1;RA=2.322;ISTP=0;PRIOR=false;SR=2	.	.	.	.	.	0.000869565	.
6	72995385	TSD=null;ASSESS=4;INTERNAL=NM_019842,INTRONIC;SVTYPE=LINE1;SVLEN=6005;MEINFO=L1Ambig,13,6018,-;DIFF=0.06:n1-12,n16,i73g,t231c,t254a,g321c,c332t,a341g,a373g,g378c,c406a,a423g,g483a,n492-6019;LP=11;RP=12;RA=-0.126;ISTP=0;PRIOR=false;SR=2	.	.	.	.	.	0.0121739	.
6	73701798	TSD=AAGAAAAAATGCTAG;ASSESS=5;INTERNAL=CD109,INTRONIC;SVTYPE=LINE1;SVLEN=6015;MEINFO=L1Ambig,4,6019,+;DIFF=0.09:n1-3,i73g,c115a,g167a,c205t,t231c,t254a,c257t,c305t,g352a,n412-6019;LP=11;RP=10;RA=0.138;ISTP=0;PRIOR=false;SR=13;AF=0.000150105;AC=1	.	.	.	0.000150105	.	.	.
6	73785055	TSD=TTAATTTTCTTTT;ASSESS=5;INTERNAL=CD109,INTRONIC;SVTYPE=LINE1;SVLEN=6018;MEINFO=L1Ta,1,6019,-;DIFF=0.1:n1-5622,c5748g;LP=16;RP=32;RA=-1;ISTP=0;PRIOR=false;SR=22;AF=0.00030021;AC=2	.	.	.	0.00030021	.	.	.
6	74186928	TSD=GTGAGCACTTTTT;ASSESS=5;INTERNAL=NR_110856,INTRONIC;SVTYPE=LINE1;SVLEN=6016;MEINFO=L1Ta1d,3,6019,-;DIFF=0.11:n1-3,n391-486,c491t,n519,n553,n557,n563,n574,n591,n595,n599,n603,n612,n616-617,n631,n636-6019;LP=42;RP=56;RA=-0.415;ISTP=0;PRIOR=false;SR=44	0.0071885	0.00286533	.	0.00105074	.	.	.
6	74856639	TSD=CCAAATTCCTCCTTTTTA;ASSESS=5;INTERNAL=null,null;SVTYPE=LINE1;SVLEN=6018;MEINFO=L1Ta1d,1,6019,-;DIFF=0.1:g167a,t231c,t254a,c324a,n383,n415-6019;LP=20;RP=41;RA=-1.036;ISTP=0;PRIOR=false;SR=27;AF=0.000399361;AC=2	0.000399361	.	.	.	.	.	.
6	75200606	TSD=AAAGAATAAATTGC;ASSESS=5;INTERNAL=COL12A1,INTRONIC;SVTYPE=LINE1;SVLEN=6016;MEINFO=L1Ta1d,3,6019,+;DIFF=0.11:n1-3,g201t,c207a,g210c,g221t,t231c,t254a,a388g,n466-6019;LP=21;RP=29;RA=-0.466;ISTP=0;PRIOR=false;SR=34;AF=0.00030021;AC=2	.	.	.	0.00030021	.	.	.
6	76046330	TSD=ATTGTACTATTTTA;ASSESS=5;INTERNAL=NM_001282368,INTRONIC;SVTYPE=LINE1;SVLEN=6018;MEINFO=L1Ta1d,1,6019,-;DIFF=0.11:n1,c144g,t231c,t254a,n490-6019;LP=6;RP=23;RA=-1.939;ISTP=0;PRIOR=false;SR=16	0.000998403	0.000716332	.	.	.	.	.
6	76654827	TSD=AGCTTTATTTTTT;ASSESS=5;INTERNAL=null,null;SVTYPE=LINE1;SVLEN=6017;MEINFO=L1Ta,2,6019,-;DIFF=0.09:n1-5632,n5636,t5700g,n5704-5717,n5730,n5739-5740,g5766a,g5886c,n5902-5925;LP=15;RP=26;RA=-0.794;ISTP=0;PRIOR=false;SR=17;AF=0.000199681;AC=1	0.000199681	.	.	.	.	.	.
6	77545311	TSD=GAGTGATTCCATCCTTTT;ASSESS=5;INTERNAL=null,null;SVTYPE=LINE1;SVLEN=6010;MEINFO=L1Ta1d,9,6019,-;DIFF=0.1:n1-9,c115a,c143t,g167a,t231c,t254a,c257t,g352a,n419-458,n609-6019;LP=13;RP=27;RA=-1.054;ISTP=0;PRIOR=false;SR=18	0.00159744	0.000716332	.	0.00030021	.	.	.
6	79000614	TSD=CCTAAAGTAGCTATCTATTTT;ASSESS=5;INTERNAL=NM_017934,INTRONIC;SVTYPE=LINE1;SVLEN=6016;MEINFO=L1Ta1d,3,6019,-;DIFF=0.1:n1-3,c144g,t231c,t254a,n411,n495-6019;LP=7;RP=11;RA=-0.652;ISTP=0;PRIOR=false;SR=12;GENE=PHIP;AF=0.000199681;AC=1	0.000199681	.	.	.	.	.	.
6	79926534	TSD=AAAAAATACATGGTATAA;ASSESS=5;INTERNAL=NM_022726,INTRONIC;SVTYPE=LINE1;SVLEN=6015;MEINFO=L1Ta,4,6019,+;DIFF=0.11:n1-5552;LP=15;RP=15;RA=0;ISTP=0;PRIOR=false;SR=24;GENE=ELOVL4;AF=0.000199681;AC=1	0.000199681	.	.	.	.	.	.
6	80583860	TSD=null;ASSESS=3;INTERNAL=null,null;SVTYPE=LINE1;SVLEN=6016;MEINFO=L1Ambig,2,6018,-;DIFF=0.03:n1,n3,n6,g38a,g64a,i73g,g138a,c143t,t149g,c155t,n164-6019;LP=1;RP=17;RA=-4.087;ISTP=-1;PRIOR=false;SR=1	.	.	.	.	0.0238095	.	.
6	82216269	TSD=null;ASSESS=4;INTERNAL=IBTK,INTRONIC;SVTYPE=LINE1;SVLEN=6019;MEINFO=L1Ambig,0,6019,+;DIFF=0.01:n64-96,n173-6019;LP=3;RP=1;RA=1.585;ISTP=-1;PRIOR=false;SR=8	.	.	.	.	.	.	1.00737e-05
6	82569055	TSD=TACACCCTGATTTTTTTT;ASSESS=5;INTERNAL=null,null;SVTYPE=LINE1;SVLEN=6019;MEINFO=L1Ambig,0,6019,-;DIFF=0.13:n1-3,i73g,c115a,c143t,g167a,t231c,t254a,c257t,n290,g352a,n484-6019;LP=27;RP=30;RA=-0.152;ISTP=0;PRIOR=false;SR=22;AF=0.000399361;AC=2	0.000399361	.	.	.	.	.	.
6	82809986	TSD=TTTTTTTTTTTTTTTTTTTTTTTTTTTTT;ASSESS=5;INTERNAL=UBE3D,TERMINATOR;SVTYPE=LINE1;SVLEN=6006;MEINFO=L1Ambig,12,6018,+;DIFF=0.01:n1-11,g38a,a43g,n54-6019;LP=26;RP=46;RA=-0.823;ISTP=0;PRIOR=false;SR=92;AF=0.00375263;AC=25	.	.	.	0.00375263	.	.	.
6	83462124	TSD=CCCTAGGACCTTTCTT;ASSESS=5;INTERNAL=null,null;SVTYPE=LINE1;SVLEN=6017;MEINFO=L1Ta1d,2,6019,-;DIFF=0.11:n1-2,t231c,t254a,n476-6019;LP=10;RP=23;RA=-1.202;ISTP=0;PRIOR=false;SR=8;AF=0.000199681;AC=1	0.000199681	.	.	.	.	.	.
6	83725174	TSD=AAGAATAAAGGACTGTA;ASSESS=5;INTERNAL=null,null;SVTYPE=LINE1;SVLEN=6017;MEINFO=L1Ta1d,1,6018,-;DIFF=0.09:n324-6019;LP=13;RP=6;RA=1.115;ISTP=0;PRIOR=false;SR=7	0.00119808	0.000716332	.	0.000150105	.	.	.
6	83787913	TSD=ATAAATGGGATTAGT;ASSESS=5;INTERNAL=null,null;SVTYPE=LINE1;SVLEN=6018;MEINFO=L1Ta1d,1,6019,+;DIFF=0.1:n1-3,t82g,t231c,t254a,t290g,n424-6019;LP=24;RP=7;RA=1.778;ISTP=0;PRIOR=false;SR=14;AF=0.000199681;AC=1	0.000199681	.	.	.	.	.	.
6	83988611	TSD=CCTTCAATAGACTTTT;ASSESS=5;INTERNAL=null,null;SVTYPE=LINE1;SVLEN=6017;MEINFO=L1Ta1d,2,6019,-;DIFF=0.08:t231c,t254a,n360-6019;LP=4;RP=16;RA=-2;ISTP=0;PRIOR=false;SR=14;AF=0.000199681;AC=1	0.000199681	.	.	.	.	.	.
6	84049887	TSD=GTAATTGAGTACTTTCT;ASSESS=5;INTERNAL=NM_138409,INTRONIC;SVTYPE=LINE1;SVLEN=6018;MEINFO=L1Ta1d,1,6019,-;DIFF=0.11:n1,g210c,t231c,t254a,a388g,n416,n471-6019;LP=8;RP=19;RA=-1.248;ISTP=0;PRIOR=false;SR=8;GENE=MRAP2;AF=0.000199681;AC=1	0.000199681	.	.	.	.	.	.
6	84354580	TSD=AAAAGCAGTAAAGTG;ASSESS=5;INTERNAL=null,null;SVTYPE=LINE1;SVLEN=6019;MEINFO=L1Ta1d,0,6019,+;DIFF=0.07:t231c,t254a,n389-6019;LP=16;RP=2;RA=3;ISTP=0;PRIOR=false;SR=9;GENE=LOC107986621;AF=0.000199681;AC=1	0.000199681	.	.	.	.	.	.
6	84354945	TSD=AAAAAGTTCTTCAAG;ASSESS=5;INTERNAL=LINC01611,TERMINATOR;SVTYPE=LINE1;SVLEN=6019;MEINFO=L1Ta1d,0,6019,+;DIFF=0.1:t231c,n408-6019;LP=14;RP=12;RA=0.222;ISTP=0;PRIOR=false;SR=14;AF=0.000150105;AC=1	.	.	.	0.000150105	.	.	.
6	84740782	TSD=TAATTGTAGTTTT;ASSESS=5;INTERNAL=NM_001080508,INTRONIC;SVTYPE=LINE1;SVLEN=6017;MEINFO=L1Ambig,2,6019,-;DIFF=0.09:n1-3,i73g,c115a,g167a,t231c,t254a,c257t,g352a,n395-454,g483t,g492c,n494,g523a,g524t,n532-6019;LP=4;RP=20;RA=-2.322;ISTP=0;PRIOR=false;SR=9	.	.	.	.	.	0.000869565	.
6	84876041	TSD=AAAAATTGTATAAGC;ASSESS=5;INTERNAL=null,null;SVTYPE=LINE1;SVLEN=6019;MEINFO=L1Ta1d,0,6019,+;DIFF=0.11:c144g,t231c,t254a,n612-6019;LP=26;RP=22;RA=0.241;ISTP=0;PRIOR=false;SR=35;AF=0.000399361;AC=2	0.000399361	.	.	.	.	.	.
6	84980384	TSD=TCTTTGTTTTT;ASSESS=5;INTERNAL=TBX18,PROMOTER;SVTYPE=LINE1;SVLEN=6019;MEINFO=L1Ta1d,0,6019,-;DIFF=0.1:n1-2,t231c,t254a,c327t,n382-6019;LP=4;RP=18;RA=-2.17;ISTP=0;PRIOR=false;SR=7;AF=0.000150105;AC=1	.	.	.	0.000150105	.	.	.
6	85138358	TSD=null;ASSESS=4;INTERNAL=null,null;SVTYPE=LINE1;SVLEN=6014;MEINFO=L1Ta1d,4,6018,-;DIFF=0.1:n1-3,n441-6019;LP=10;RP=16;RA=-0.678;ISTP=0;PRIOR=false;SR=7;AF=0.000199681;AC=1	0.000199681	.	.	.	.	.	.
6	85334044	TSD=null;ASSESS=4;INTERNAL=null,null;SVTYPE=LINE1;SVLEN=6016;MEINFO=L1Ambig,3,6019,+;DIFF=0.05:n1-3,g61a,i73g,t231c,t254a,g352a,n442-6019;LP=9;RP=1;RA=3.17;ISTP=-1;PRIOR=false;SR=2;AF=0.000199681;AC=1	0.000199681	.	.	.	.	.	.
6	86987077	TSD=AAATAAACACATATAGA;ASSESS=5;INTERNAL=HTR1E,INTRONIC;SVTYPE=LINE1;SVLEN=6019;MEINFO=L1Ambig,0,6019,+;DIFF=0.08:n1-3,i73g,c115a,c143t,g167a,t231c,t254a,c257t,g352a,n459-6019;LP=84;RP=53;RA=0.664;ISTP=0;PRIOR=false;SR=64;AF=0.00090063;AC=6	.	.	.	0.00090063	.	.	.
6	87032069	TSD=AAGAAATTAATGA;ASSESS=5;INTERNAL=null,null;SVTYPE=LINE1;SVLEN=6010;MEINFO=L1Ta1d,9,6019,+;DIFF=0.1:n1-9,c37a,t231c,g252c,t254a,g285a,c363t,n457,n505-6019;LP=35;RP=14;RA=1.322;ISTP=0;PRIOR=false;SR=31	.	0.00143266	.	0.00195137	.	.	.
6	88197360	TSD=GAAAGCATTCAAAGTC;ASSESS=5;INTERNAL=CNR1,PROMOTER;SVTYPE=LINE1;SVLEN=6019;MEINFO=L1Ta1d,0,6019,+;DIFF=0.09:n149-222,c230a,t231c,n244,n251-254,n259,c260a,c295a,c324a,n426-426,n438,n440-441,n444-445,n481-482,n486,n503,n529-6019;LP=27;RP=26;RA=0.054;ISTP=0;PRIOR=false;SR=36;AF=0.00030021;AC=2	.	.	.	0.00030021	.	.	.
6	88253458	TSD=AATTGCTTCTATTTTCT;ASSESS=5;INTERNAL=null,null;SVTYPE=LINE1;SVLEN=6014;MEINFO=L1Ta,5,6019,-;DIFF=0.1:n1-5544,n5557,n5563,n5566-5567,n5576-5578,n5582-5583,g5586t,n5587,n5591,n5593-5594,n5598,t5610a,n5611,n5617,n5622,n5626-5627,n5629,n5637,n5639,n5646,n5652,n5657,n5659-5661,n5664,n5670,n5672-5673,g5676t,n5677,n5682,n5685-5686,n5689-5705,a6006g;LP=16;RP=5;RA=1.678;ISTP=0;PRIOR=false;SR=8;AF=0.000…	0.000199681	.	.	.	.	.	.
6	88568666	TSD=CCAGCTCAACTTTT;ASSESS=5;INTERNAL=null,null;SVTYPE=LINE1;SVLEN=6010;MEINFO=L1Ta,8,6018,-;DIFF=0.12:n1-5503,n5546,n5607,n5625,n5667;LP=21;RP=30;RA=-0.515;ISTP=0;PRIOR=false;SR=16;AF=0.000399361;AC=2	0.000399361	.	.	.	.	.	.
6	89362086	TSD=AAACATTTCGA;ASSESS=5;INTERNAL=NM_021244,TERMINATOR;SVTYPE=LINE1;SVLEN=6014;MEINFO=L1Ambig,4,6018,+;DIFF=0.12:n1-3,i73g,c115a,c143t,g167a,t231c,t254a,c257t,g352a,n481-6019;LP=60;RP=27;RA=1.152;ISTP=0;PRIOR=false;SR=18;AF=0.000599042;AC=3	0.000599042	.	.	.	.	.	.
6	89432742	TSD=AGAAATAAAGGCTTCCT;ASSESS=5;INTERNAL=NM_014942,PROMOTER;SVTYPE=LINE1;SVLEN=6019;MEINFO=L1Ta1d,0,6019,+;DIFF=0.11:n1-2,t231c,t254a,c327t,n535,n586-6019;LP=24;RP=14;RA=0.778;ISTP=0;PRIOR=false;SR=13	0.000199681	0.000716332	.	.	.	.	.
6	90067267	TSD=AAAAGACGGAGCCC;ASSESS=5;INTERNAL=NM_021813,INTRONIC;SVTYPE=LINE1;SVLEN=6016;MEINFO=L1Ta1d,3,6019,+;DIFF=0.09:n1-3,n341-6019;LP=12;RP=9;RA=0.415;ISTP=0;PRIOR=false;SR=11	.	.	.	.	.	0.000869565	.
6	90224635	TSD=GCATTTTCTTTT;ASSESS=5;INTERNAL=BACH2,INTRONIC;SVTYPE=LINE1;SVLEN=6019;MEINFO=L1Ta1d,0,6019,-;DIFF=0.1:n1-11,t231c,n323,n414-6019;LP=18;RP=14;RA=0.363;ISTP=0;PRIOR=false;SR=18;AF=0.00030021;AC=2	.	.	.	0.00030021	.	.	.
6	90243295	TSD=AAAGGTTATGCAATTCTT;ASSESS=5;INTERNAL=NM_021813,INTRONIC;SVTYPE=LINE1;SVLEN=6015;MEINFO=L1Ta1d,4,6019,-;DIFF=0.08:n1-28,t231c,n370,n383,n460,n472,n494,n500,n521-6019;LP=26;RP=39;RA=-0.585;ISTP=0;PRIOR=false;SR=25	0.00199681	0.00143266	0.0206835	0.00090063	.	0.00521739	.
6	92620580	TSD=AACAAGAAAAATCCC;ASSESS=5;INTERNAL=EPHA7,TERMINATOR;SVTYPE=LINE1;SVLEN=6019;MEINFO=L1Ta1d,0,6019,+;DIFF=0.07:t231c,n321-6019;LP=5;RP=12;RA=-1.263;ISTP=0;PRIOR=false;SR=10;AF=0.000150105;AC=1	.	.	.	0.000150105	.	.	.
6	92758246	TSD=ACGTTTTTCTTTTT;ASSESS=5;INTERNAL=null,null;SVTYPE=LINE1;SVLEN=6019;MEINFO=L1Ta,0,6019,-;DIFF=0.13:n1-5572,a5837c,c5945t;LP=33;RP=26;RA=0.344;ISTP=0;PRIOR=false;SR=25;AF=0.000599042;AC=3	0.000599042	.	.	.	.	.	.
6	93959972	TSD=TCATTTGTTT;ASSESS=5;INTERNAL=TSG1,TERMINATOR;SVTYPE=LINE1;SVLEN=6012;MEINFO=L1Ta1d,7,6019,-;DIFF=0.12:n1-7,c37t,g61a,t231c,t254a,n440-6019;LP=37;RP=29;RA=0.351;ISTP=0;PRIOR=false;SR=28;AF=0.000450315;AC=3	.	.	.	0.000450315	.	.	.
6	94061850	TSD=TCCTATTCAGATTTTCT;ASSESS=5;INTERNAL=null,null;SVTYPE=LINE1;SVLEN=6015;MEINFO=L1Ta1d,4,6019,-;DIFF=0.13:n1-3,c144g,t231c,t254a,n460-6019;LP=69;RP=102;RA=-0.564;ISTP=0;PRIOR=false;SR=60	0.00139776	0.00429799	.	0.00705494	.	.	.
6	94219386	TSD=null;ASSESS=1;INTERNAL=TSG1,TERMINATOR;SVTYPE=LINE1;SVLEN=6015;MEINFO=L1Ambig,3,6018,+;DIFF=0.02:n1-3412,g3424a,t3443a,a3450g,a3518g,t3534c,g3549t,n3564-3594,t3603c,g3604a,a3688t,n3746-3896,c3954t,t3970a,g3984a,c4026t,n4058-6019;LP=1;RP=5;RA=-2.322;ISTP=-1;PRIOR=false;SR=0;AF=0.00030021;AC=2	.	.	.	0.00030021	.	.	.
6	95097941	TSD=TAGTTGCTTTGTTTT;ASSESS=5;INTERNAL=null,null;SVTYPE=LINE1;SVLEN=6016;MEINFO=L1Ta,3,6019,-;DIFF=0.11:n1-5355,n5652-5790;LP=10;RP=12;RA=-0.263;ISTP=0;PRIOR=false;SR=10;AF=0.000199681;AC=1	0.000199681	.	.	.	.	.	.
6	95521475	TSD=null;ASSESS=4;INTERNAL=null,null;SVTYPE=LINE1;SVLEN=6014;MEINFO=L1Ambig,4,6018,-;DIFF=0.08:n1-1634,a1641c,t1661c,g1662t,c1680t,a1690g,g1704a,g1731t,a1758g,t1802c,t1816c,n1831-1849,n1854,t1856a,n1859,n1863,g1869a,n1871,n1874,n1876,n1883,c1891t,g1902a,t1911a,a1921t,g1935a,g1937t,a1938g,t1963c,c1973a,a2032g,a2040g,t2042c,t2047g,g2050c,g2075a,c2096t,g2103a,a2110c,g2115a,c2120t,c2125t,g2130a,n2139…	0.000199681	.	.	.	.	.	.
[truncated: 2,182 more rows]

## Sheet: B
B. Genome-Tissue Expression project (576 + 63). Number of FL-L1Hs elements per sample (Figure 2B).
Sample ID	RP Length	FL-L1Hs elements
GTEX-19HZE-0002-SM-7J39O	150	35
GTEX-132QS-0003-SM-7DROZ	150	40
[truncated: 637 more rows]

## Sheet: C
C. TOPMed Jackson Heart Study. Number of FL-L1Hs elements per sample (Figure 2B).
[truncated: 3,332 more rows]

[truncated: 3 more sheets: D, E, F]
