# Supplementary material for: Mutagenesis of human genomes by endogenous mobile elements on a population scale
Source: HighWire-hosted journal article supplement (doi:10.1101/gr.275323.121), 2021-11-12
Supplement: Supplemental_Table_S4.xlsx [file Supplemental_Table_S4.xlsx]

## Sheet: A
Supplemental_Table_S4.xlsx. Internal mutations in PacBio-sequenced FL-L1Hs elements.
A. CpG mutations in 5' UTRs of PacBio-sequenced FL-L1Hs elements (Figure 4C).
Pos	Ta0	Ta1nd	Ta1d-CAT	Ta1d-CCA	Ta1d-TCA
18	-4	0	0	-3	-1
34	0	-2	-7	-10	0
51	0	-5	-2	0	0
57	-14	0	0	-10	0
60	0	-3	-1	0	-2
69	-1	0	0	0	0
79	0	0	0	0	5
80	0	0	2	0	0
88	1	0	0	0	0
100	-2	0	-1	0	0
121	0	5	0	0	0
135	0	0	0	-3	0
141	0	0	0	35	0
149	0	0	0	1	0
151	0	1	0	1	1
153	-6	-1	-1	-1	0
155	0	0	0	0	2
158	-10	0	-1	0	0
162	0	-3	-1	0	-1
164	-40	0	-4	0	-16
169	0	0	-1	-1	-1
179	0	0	-2	0	-1
182	0	0	0	0	6
187	0	1	0	0	0
190	1	0	0	0	0
192	0	0	1	0	0
194	0	0	0	0	1
203	-3	-5	-2	-3	0
208	0	0	0	0	36
229	-2	-1	-57	-2	-7
244	0	1	0	0	0
249	-14	-1	0	-1	-3
253	-1	-3	-5	-3	0
267	0	0	0	-1	-2
282	0	0	-7	0	0
289	0	0	0	5	0
291	0	0	0	0	0
293	0	0	0	1	0
303	-4	-1	0	-1	0
315	0	0	-1	-1	0
318	0	-1	0	0	0
325	-5	-1	-54	-6	0
330	1	1	0	0	0
338	0	0	0	0	1
349	1	5	182	136	152
361	-2	-4	-8	-2	-1
367	-1	0	0	-5	0
373	0	1	0	0	0
375	0	-4	-1	-1	-1
384	0	0	0	0	1
416	-1	0	-2	-3	0
422	0	-3	-4	-1	0
428	0	0	1	0	0
431	0	1	0	0	0
439	0	0	0	0	0
443	-5	-1	-2	0	0
480	-5	-3	-3	-12	-1
489	-2	-3	-12	-3	0
493	0	0	0	1	0
495	0	0	2	0	0
594	0	0	0	10	0
598	1	0	0	0	0
620	0	0	1	0	0
649	-15	-4	-44	-1	0
655	0	0	0	0	1
669	-10	-8	-2	-6	0
712	-1	0	0	-8	-1
765	-12	-4	-2	-1	-10
785	0	0	6	0	0
837	0	0	0	1	0
846	-1	-1	0	-1	-1
858	0	1	0	0	0
871	0	0	1	0	0
902	1	0	0	0	0

## Sheet: B
B. Synonymous and nonsynonymous mutations in ORF1 and ORF2 regions of PacBio-sequenced FL-L1Hs elements (Figure 4D).
Pos	Ta0 - Syn	Ta0 - Nonsyn	Ta1nd - Syn	Ta1nd - Nonsyn	Ta1d-CAT - Syn	Ta1d-CAT - Nonsyn	Ta1d-CCA - Syn	Ta1d-CCA - Nonsyn	Ta1d-TCA - Syn	Ta1d-TCA - Nonsyn	Total Syn	Total Nonsyn
904	0	0	0	0	0	0	0	0	0	0	0	0
905	0	0	0	0	0	0	0	0	0	0	0	0
906	0	0	0	0	0	0	0	0	0	0	0	0
907	0	0	0	0	0	0	0	0	0	0	0	0
908	0	0	0	0	0	0	0	0	0	0	0	0
909	0	0	0	0	0	1	0	0	0	0	0	1
910	0	0	0	0	0	0	0	0	0	0	0	0
911	0	0	0	0	0	0	0	0	0	0	0	0
912	0	0	0	0	0	0	0	0	0	0	0	0
913	0	0	0	0	0	0	0	0	0	0	0	0
914	0	0	0	0	0	0	0	0	0	0	0	0
915	0	0	0	0	0	0	0	0	0	0	0	0
916	0	0	0	0	0	0	0	0	0	0	0	0
917	0	0	0	0	0	0	0	0	0	0	0	0
918	0	0	0	0	0	0	0	0	0	0	0	0
919	0	0	0	0	0	0	0	0	0	0	0	0
920	0	0	0	0	0	0	0	0	0	0	0	0
921	0	0	0	0	0	0	0	0	0	0	0	0
922	0	0	0	0	0	0	0	0	0	1	0	1
923	0	0	0	0	0	0	0	0	0	0	0	0
924	0	0	0	0	0	0	0	1	0	0	0	1
925	0	0	0	0	0	0	0	0	0	0	0	0
926	0	0	0	0	0	0	0	0	0	0	0	0
927	0	0	0	0	0	0	0	0	0	0	0	0
928	0	0	0	0	0	0	0	0	0	0	0	0
929	0	0	0	0	0	0	0	0	0	0	0	0
930	0	0	0	0	0	0	0	0	0	0	0	0
931	0	0	0	0	0	0	0	0	0	0	0	0
932	0	0	0	1	0	0	0	0	0	0	0	1
933	0	0	0	0	0	0	0	0	0	0	0	0
934	0	0	0	0	0	0	0	0	0	0	0	0
935	0	0	0	0	0	0	0	0	0	0	0	0
936	0	1	0	0	0	0	0	0	0	0	0	1
937	0	0	0	0	0	0	0	0	0	0	0	0
938	0	0	0	0	0	0	0	0	0	0	0	0
939	0	0	0	0	0	0	0	0	0	0	0	0
940	0	0	0	0	0	0	0	0	0	0	0	0
941	0	0	0	0	0	0	0	0	0	0	0	0
942	0	0	0	0	0	0	0	0	0	0	0	0
943	0	0	0	0	0	0	0	0	0	0	0	0
944	0	0	0	0	0	0	0	0	0	0	0	0
945	0	2	0	0	0	1	0	1	0	0	0	4
946	1	0	0	0	0	0	45	0	0	0	46	0
947	0	0	0	0	0	0	0	0	0	0	0	0
948	0	0	0	0	0	0	0	0	0	0	0	0
949	0	0	0	0	0	0	0	0	0	0	0	0
950	0	0	0	0	0	0	0	0	0	0	0	0
951	0	0	0	0	0	0	0	0	0	0	0	0
952	1	0	0	0	0	0	2	0	0	0	3	0
953	0	0	0	1	0	2	0	3	0	0	0	6
954	0	11	0	0	0	0	0	0	0	0	0	11
955	0	0	0	0	0	0	0	0	0	0	0	0
956	0	0	0	0	0	0	0	0	0	0	0	0
957	0	0	0	0	0	0	0	0	0	0	0	0
958	0	0	0	0	0	0	0	0	0	0	0	0
959	0	0	0	0	0	0	0	0	0	0	0	0
960	0	0	0	0	0	0	0	0	0	0	0	0
961	0	0	0	0	0	0	0	0	0	0	0	0
962	0	0	0	0	0	0	0	0	0	0	0	0
963	0	0	0	0	0	0	0	0	0	0	0	0
964	0	0	0	0	0	0	0	0	0	0	0	0
965	0	0	0	0	0	0	0	0	0	0	0	0
966	0	0	0	0	0	0	0	0	0	0	0	0
967	0	0	0	0	0	0	0	0	0	0	0	0
968	0	0	0	0	0	0	0	0	0	0	0	0
969	0	0	0	0	0	0	0	0	0	0	0	0
970	0	0	0	0	0	0	0	0	0	0	0	0
971	0	0	0	0	0	0	0	0	0	0	0	0
972	0	0	0	0	0	0	0	0	0	0	0	0
973	0	0	0	0	0	0	0	0	0	0	0	0
974	0	0	0	0	0	0	0	3	0	0	0	3
975	0	3	0	2	0	0	0	4	0	0	0	9
976	0	0	0	0	0	0	0	0	0	0	0	0
977	0	0	0	0	0	0	0	0	0	0	0	0
978	0	0	0	0	0	0	0	0	0	0	0	0
979	0	0	0	0	0	0	0	0	0	0	0	0
980	0	0	0	0	0	0	0	0	0	0	0	0
981	0	0	0	0	0	0	0	0	0	0	0	0
982	0	0	0	0	0	0	0	0	0	0	0	0
983	0	0	0	0	0	0	0	0	0	0	0	0
984	0	0	0	0	0	0	0	0	0	0	0	0
985	0	0	0	0	0	0	0	0	0	0	0	0
986	0	0	0	0	0	0	0	0	0	0	0	0
987	0	40	0	0	0	0	0	0	0	0	0	40
988	0	0	0	0	0	0	0	0	0	0	0	0
989	0	0	0	0	0	0	0	0	0	0	0	0
990	0	0	0	0	0	0	0	0	0	0	0	0
991	0	0	0	0	0	0	0	0	0	0	0	0
992	0	0	0	0	0	0	0	0	0	0	0	0
993	0	0	0	0	0	1	0	0	0	0	0	1
994	2	0	0	0	17	0	1	0	0	0	20	0
995	0	0	0	0	0	0	0	0	0	0	0	0
996	0	0	0	0	0	0	0	0	0	0	0	0
997	0	0	0	0	0	0	0	0	0	0	0	0
998	0	0	0	0	0	0	0	0	0	0	0	0
999	0	0	0	0	0	0	0	0	0	0	0	0
1000	0	0	0	0	15	0	0	0	0	0	15	0
1001	0	0	0	0	0	0	0	0	0	0	0	0
1002	0	0	0	0	0	0	0	0	0	0	0	0
1003	0	0	0	0	0	0	0	0	0	0	0	0
1004	0	0	0	1	0	0	0	0	0	0	0	1
1005	0	0	0	0	0	0	0	0	0	0	0	0
1006	0	0	0	0	0	0	0	0	0	0	0	0
1007	0	0	0	0	0	0	0	2	0	0	0	2
1008	0	0	0	0	0	0	0	0	0	0	0	0
1009	0	0	0	0	0	0	0	0	0	0	0	0
1010	0	0	0	0	0	0	0	0	0	0	0	0
1011	0	0	0	0	0	0	0	0	0	0	0	0
1012	0	0	0	1	0	3	0	0	0	0	0	4
1013	0	0	0	0	0	0	0	0	0	0	0	0
1014	0	0	0	0	0	0	0	0	0	0	0	0
1015	0	0	0	0	0	0	0	0	0	0	0	0
1016	0	0	0	0	0	0	0	0	0	0	0	0
1017	0	0	0	0	0	0	0	0	0	0	0	0
1018	0	0	0	0	0	0	0	0	0	0	0	0
1019	0	0	0	0	0	0	0	0	0	0	0	0
1020	0	0	0	0	0	0	0	0	0	0	0	0
1021	0	0	0	0	0	0	0	0	0	0	0	0
1022	0	0	0	0	0	0	0	0	0	0	0	0
1023	0	0	0	0	0	1	0	0	0	0	0	1
1024	0	0	2	0	0	0	0	0	150	0	152	0
1025	0	0	0	1	0	1	0	0	0	0	0	2
1026	0	0	0	0	0	0	0	0	0	1	0	1
1027	0	0	0	0	0	0	0	0	0	0	0	0
1028	0	0	0	0	0	0	0	0	1	0	1	0
1029	0	0	0	0	0	0	0	0	0	1	0	1
1030	0	0	0	0	0	0	0	0	0	0	0	0
1031	0	0	0	0	0	0	0	0	0	0	0	0
1032	0	0	0	0	0	0	0	0	0	0	0	0
1033	0	0	0	0	0	0	0	0	0	0	0	0
1034	0	0	0	0	0	0	0	0	0	0	0	0
1035	0	0	0	0	0	0	0	0	0	0	0	0
1036	0	0	0	0	0	0	0	0	0	0	0	0
1037	0	0	0	0	0	0	0	0	0	0	0	0
1038	0	0	0	0	0	0	0	0	0	0	0	0
1039	0	0	1	0	0	0	0	0	0	0	1	0
1040	0	0	0	1	0	0	0	0	0	0	0	1
1041	0	0	0	0	0	3	0	0	0	0	0	3
1042	0	0	0	0	0	0	0	0	0	0	0	0
1043	0	0	0	0	0	0	0	0	0	0	0	0
1044	0	0	0	0	0	0	0	0	0	0	0	0
1045	0	0	0	0	0	0	0	0	0	0	0	0
1046	0	0	0	0	0	0	0	0	0	0	0	0
1047	0	0	0	0	0	0	0	0	0	0	0	0
1048	0	0	0	0	0	0	0	0	0	0	0	0
1049	0	1	0	0	0	0	0	0	0	0	0	1
1050	0	0	0	2	0	0	0	2	0	0	0	4
1051	0	0	0	0	0	0	0	0	0	0	0	0
1052	0	0	0	0	0	0	0	0	0	0	0	0
1053	0	0	0	0	0	0	0	0	0	0	0	0
1054	0	0	0	0	0	0	0	0	0	0	0	0
1055	0	0	0	0	0	0	0	0	0	0	0	0
1056	0	0	0	1	0	0	0	0	0	0	0	1
1057	0	0	0	0	0	0	0	0	0	0	0	0
1058	0	0	0	0	0	0	0	0	0	0	0	0
1059	0	0	0	0	0	0	0	0	0	0	0	0
1060	1	0	0	0	0	0	1	0	0	0	2	0
1061	0	0	0	0	0	0	0	0	0	0	0	0
1062	0	0	0	0	0	0	0	0	0	0	0	0
1063	0	0	0	0	0	0	0	0	0	0	0	0
1064	0	0	0	0	0	0	0	0	0	0	0	0
1065	0	0	0	0	0	0	0	0	0	0	0	0
1066	0	0	0	0	0	0	0	0	0	0	0	0
1067	0	0	0	0	0	0	0	0	0	0	0	0
1068	0	0	0	0	0	0	0	0	0	0	0	0
1069	0	0	0	0	0	0	0	0	0	0	0	0
1070	0	0	0	2	0	0	0	0	0	0	0	2
1071	0	0	0	0	0	0	0	1	0	0	0	1
1072	0	0	0	0	0	0	0	0	0	0	0	0
1073	0	0	0	1	0	0	0	0	0	0	0	1
1074	0	0	0	0	0	0	0	0	0	0	0	0
1075	0	0	0	0	0	0	0	0	0	0	0	0
1076	0	0	0	0	0	0	0	0	0	0	0	0
1077	0	0	0	0	0	0	0	0	0	0	0	0
1078	0	0	0	0	0	0	0	0	0	0	0	0
1079	0	0	0	0	0	0	0	0	0	0	0	0
1080	0	0	0	0	0	0	0	0	0	0	0	0
1081	0	0	0	0	0	0	0	0	0	0	0	0
1082	0	0	0	0	0	0	0	0	0	0	0	0
1083	0	0	0	0	0	0	0	0	0	0	0	0
1084	0	0	0	0	0	0	0	0	0	0	0	0
1085	0	0	0	0	0	0	0	0	0	0	0	0
1086	0	0	0	0	0	6	0	0	0	0	0	6
1087	0	0	0	0	0	0	0	0	0	0	0	0
1088	0	0	0	0	0	0	0	0	0	0	0	0
1089	0	0	0	0	0	0	0	0	0	0	0	0
1090	0	0	0	0	0	0	0	0	0	0	0	0
1091	0	0	0	0	0	0	0	0	0	0	0	0
1092	0	0	0	0	0	0	0	0	0	0	0	0
1093	0	0	0	0	0	0	0	0	0	0	0	0
1094	0	0	0	0	0	0	0	0	0	0	0	0
1095	0	0	0	0	0	0	0	0	0	0	0	0
1096	0	0	0	0	0	0	0	0	0	0	0	0
1097	0	0	0	0	0	0	0	1	0	0	0	1
1098	0	0	0	0	0	0	0	0	0	0	0	0
1099	0	0	0	0	0	0	0	0	0	0	0	0
1100	0	0	0	3	0	0	0	0	0	0	0	3
1101	0	0	0	0	0	0	0	0	0	0	0	0
1102	0	0	0	0	0	0	0	0	0	0	0	0
1103	0	0	0	0	0	0	0	0	0	0	0	0
1104	0	0	0	0	0	0	0	0	0	0	0	0
1105	0	0	0	0	0	0	0	0	0	0	0	0
1106	0	0	0	0	0	0	0	0	0	0	0	0
1107	0	0	0	0	0	0	0	1	0	0	0	1
1108	0	0	0	0	0	0	0	0	0	0	0	0
1109	0	0	0	0	0	0	0	0	0	0	0	0
1110	0	0	0	0	0	0	0	0	0	0	0	0
1111	0	0	0	0	0	0	0	0	0	0	0	0
1112	0	0	0	0	0	0	0	0	0	0	0	0
1113	0	0	0	0	0	0	0	1	0	0	0	1
1114	0	0	0	0	0	0	0	0	0	0	0	0
1115	0	0	0	0	0	0	0	0	0	0	0	0
1116	0	0	0	0	0	0	0	0	0	0	0	0
1117	0	0	0	0	0	0	0	0	0	0	0	0
1118	0	0	0	0	0	0	0	0	0	0	0	0
1119	0	0	0	0	0	0	0	0	0	0	0	0
1120	0	0	0	0	0	0	0	0	0	0	0	0
1121	0	0	0	0	0	0	0	0	0	0	0	0
1122	0	0	0	0	0	0	0	0	0	0	0	0
1123	0	0	0	0	0	0	0	0	0	0	0	0
1124	0	0	0	0	0	0	0	0	0	0	0	0
1125	0	0	0	0	0	0	0	0	0	0	0	0
1126	0	0	0	0	0	0	0	0	0	0	0	0
1127	0	0	0	0	0	0	0	0	0	0	0	0
1128	0	0	0	0	0	0	0	0	0	0	0	0
1129	0	0	0	0	0	0	0	0	0	0	0	0
1130	0	0	0	0	0	0	0	0	0	0	0	0
1131	0	0	0	0	0	0	0	0	0	0	0	0
1132	0	0	0	0	0	0	0	0	0	0	0	0
1133	0	0	0	0	0	0	0	0	0	0	0	0
1134	0	0	0	0	0	0	0	0	0	0	0	0
1135	0	0	0	0	0	0	0	0	0	0	0	0
1136	0	0	0	0	0	0	0	0	0	0	0	0
1137	0	0	0	0	0	0	0	0	0	0	0	0
1138	0	0	0	0	0	0	0	0	0	0	0	0
1139	0	0	0	0	0	0	0	0	0	0	0	0
1140	0	0	0	0	0	0	0	0	0	0	0	0
1141	0	0	0	0	0	0	0	0	0	0	0	0
1142	0	0	0	0	0	0	0	0	0	0	0	0
1143	0	0	0	0	0	0	0	0	0	0	0	0
1144	0	0	0	0	0	0	0	0	0	0	0	0
1145	0	0	0	0	0	12	0	0	0	0	0	12
1146	0	0	0	0	0	0	0	0	0	0	0	0
1147	0	0	0	0	0	0	0	0	0	0	0	0
1148	0	0	0	0	0	0	0	0	0	0	0	0
1149	0	0	0	0	0	0	0	0	0	0	0	0
1150	0	0	0	0	0	0	0	0	0	0	0	0
1151	0	0	0	0	0	0	0	0	0	0	0	0
1152	0	0	0	0	0	0	0	0	0	0	0	0
1153	0	0	0	0	0	0	0	0	0	0	0	0
1154	0	0	0	0	0	0	0	0	0	0	0	0
1155	0	0	0	0	0	0	0	0	0	0	0	0
1156	0	0	0	0	0	0	0	0	0	0	0	0
1157	0	0	0	0	0	0	0	1	0	0	0	1
1158	0	0	0	0	0	0	0	0	0	0	0	0
1159	0	0	0	0	0	0	0	0	0	0	0	0
1160	0	0	0	0	0	0	0	0	0	0	0	0
1161	0	0	0	0	0	0	0	0	0	0	0	0
1162	0	0	0	0	1	0	0	0	0	0	1	0
1163	0	0	0	0	0	0	0	0	0	0	0	0
1164	0	0	0	0	0	0	0	0	0	0	0	0
1165	0	0	0	0	0	0	0	0	0	0	0	0
1166	0	0	0	0	0	0	0	0	0	0	0	0
1167	0	0	0	0	0	0	0	0	0	0	0	0
1168	0	0	1	0	0	0	0	0	0	0	1	0
1169	0	0	0	0	0	0	0	0	0	0	0	0
1170	0	0	0	0	0	0	0	0	0	0	0	0
1171	0	0	0	0	0	0	0	0	0	0	0	0
1172	0	0	0	0	0	0	0	0	0	0	0	0
1173	0	0	0	0	0	0	0	0	0	0	0	0
1174	0	0	0	0	0	0	0	0	0	0	0	0
1175	0	0	0	0	0	0	0	0	0	0	0	0
1176	0	0	0	1	0	0	0	0	0	0	0	1
1177	0	1	0	0	0	0	0	0	0	0	0	1
1178	0	0	0	0	0	0	0	0	0	0	0	0
1179	0	0	0	0	0	0	0	0	0	0	0	0
1180	0	0	0	0	0	0	0	0	0	0	0	0
1181	0	0	0	0	0	0	0	0	0	0	0	0
1182	0	0	0	0	0	0	0	0	0	0	0	0
1183	0	0	0	0	0	0	0	0	0	0	0	0
1184	0	0	0	0	0	0	0	0	0	0	0	0
1185	0	0	0	0	0	0	0	0	0	0	0	0
1186	0	0	0	0	0	0	0	0	0	0	0	0
1187	0	0	0	0	0	0	0	0	0	0	0	0
1188	0	1	0	0	0	0	0	0	0	0	0	1
1189	0	0	0	0	0	0	0	0	0	0	0	0
1190	0	0	0	0	0	0	0	0	0	0	0	0
1191	0	0	0	0	0	0	0	0	0	0	0	0
1192	0	0	0	0	0	0	0	0	0	0	0	0
1193	0	0	0	1	0	0	0	0	0	0	0	1
1194	0	0	0	0	0	0	0	0	0	0	0	0
1195	0	0	3	0	0	0	0	0	0	0	3	0
1196	0	1	0	1	0	0	2	0	0	6	2	8
1197	0	0	0	0	0	0	0	0	0	0	0	0
1198	0	0	0	0	0	0	0	0	0	0	0	0
1199	0	0	0	0	0	0	0	0	0	0	0	0
1200	0	0	0	0	0	0	0	0	0	0	0	0
1201	0	0	0	0	0	0	0	0	0	0	0	0
1202	0	0	0	0	0	0	3	0	0	0	3	0
1203	0	0	0	1	0	0	0	0	0	0	0	1
1204	0	0	0	0	0	0	0	0	0	0	0	0
1205	0	0	0	1	0	0	0	0	0	0	0	1
1206	0	1	0	1	0	0	0	0	0	0	0	2
1207	0	0	0	0	0	0	0	0	0	0	0	0
1208	0	0	0	0	0	1	0	0	0	0	0	1
1209	0	0	0	0	0	0	0	0	0	0	0	0
1210	0	0	0	0	0	0	0	0	0	0	0	0
1211	0	0	0	0	0	0	0	0	0	0	0	0
1212	0	0	0	0	0	0	0	0	0	0	0	0
1213	0	0	0	0	0	0	0	0	0	0	0	0
1214	0	0	0	0	0	0	0	0	0	0	0	0
1215	0	0	0	0	0	0	0	0	0	0	0	0
1216	0	0	0	0	0	0	0	0	0	0	0	0
1217	0	0	0	0	0	0	0	0	0	0	0	0
1218	0	0	0	0	0	0	0	0	0	0	0	0
1219	0	0	0	0	0	0	5	0	0	0	5	0
1220	0	0	0	0	0	0	0	0	0	0	0	0
1221	0	0	0	0	0	0	0	0	0	0	0	0
1222	0	0	0	0	0	0	0	0	0	0	0	0
1223	0	0	0	0	0	0	0	0	0	0	0	0
1224	0	0	0	0	0	0	0	0	0	0	0	0
1225	0	0	0	0	0	0	0	0	0	0	0	0
1226	0	0	0	0	0	0	0	0	0	0	0	0
1227	0	0	0	0	0	0	0	0	0	0	0	0
1228	0	0	0	0	0	0	0	0	0	0	0	0
1229	0	0	0	0	0	0	0	0	0	0	0	0
1230	0	0	0	0	0	0	0	0	0	0	0	0
1231	0	0	0	0	0	0	0	0	0	0	0	0
1232	0	0	0	0	0	0	0	0	0	0	0	0
1233	0	1	0	0	0	0	0	1	0	0	0	2
1234	0	0	0	0	0	0	0	0	0	0	0	0
1235	0	0	0	0	0	0	0	0	0	0	0	0
1236	0	1	0	0	0	0	0	0	0	0	0	1
1237	1	0	1	0	1	0	1	0	1	0	5	0
1238	0	2	0	0	0	2	0	2	0	0	0	6
1239	0	0	0	0	0	0	0	0	0	0	0	0
1240	0	0	0	0	0	0	0	0	0	0	0	0
1241	0	0	0	0	0	0	0	0	0	0	0	0
1242	0	0	0	0	0	0	0	0	0	0	0	0
1243	0	0	0	0	0	0	0	0	0	0	0	0
1244	0	0	0	0	0	0	0	0	0	0	0	0
1245	0	0	0	0	0	0	0	0	0	0	0	0
1246	0	0	0	0	0	0	0	0	0	0	0	0
1247	0	0	0	0	0	0	0	0	0	0	0	0
1248	0	0	0	0	0	0	0	0	0	0	0	0
1249	0	0	0	0	0	0	0	0	0	0	0	0
1250	0	0	0	0	0	0	0	0	0	0	0	0
1251	0	0	0	0	0	0	0	0	0	0	0	0
1252	0	1	0	0	0	0	5	0	0	0	5	1
1253	0	0	0	0	0	0	0	0	0	0	0	0
1254	0	0	0	0	0	0	0	0	0	0	0	0
1255	0	0	0	0	0	0	0	0	0	0	0	0
1256	0	0	0	0	0	0	0	0	0	0	0	0
1257	0	0	0	0	0	0	0	0	0	0	0	0
1258	0	0	0	0	0	0	0	0	0	0	0	0
1259	0	0	0	0	0	0	0	0	0	0	0	0
1260	0	0	0	0	0	0	0	0	0	0	0	0
1261	0	0	0	0	0	0	0	0	0	0	0	0
1262	0	0	0	0	0	0	0	0	0	0	0	0
1263	0	0	0	0	0	1	0	0	0	0	0	1
1264	0	0	0	0	1	0	2	0	0	0	3	0
1265	0	0	0	0	0	0	0	0	0	0	0	0
1266	0	0	0	0	0	0	0	0	0	0	0	0
1267	0	0	0	0	0	0	0	0	0	0	0	0
1268	0	0	0	0	0	0	0	0	0	0	0	0
1269	0	0	0	0	0	0	0	0	0	0	0	0
1270	0	0	0	0	0	0	0	0	0	0	0	0
1271	0	0	0	0	0	0	0	0	0	0	0	0
1272	0	0	0	0	0	0	0	0	0	0	0	0
1273	0	0	0	0	1	0	0	0	0	0	1	0
1274	0	0	0	0	0	0	0	0	0	0	0	0
1275	0	0	0	0	0	0	0	0	0	0	0	0
1276	0	0	0	0	0	0	0	0	0	0	0	0
1277	0	0	0	0	0	0	0	0	0	0	0	0
1278	0	0	0	0	0	0	0	0	0	0	0	0
1279	0	0	0	0	0	0	0	0	0	0	0	0
1280	0	0	0	0	0	0	0	0	0	0	0	0
1281	0	0	0	0	0	0	0	0	0	0	0	0
1282	0	0	0	0	0	0	0	0	0	0	0	0
1283	0	0	0	0	0	0	0	0	0	0	0	0
1284	0	0	0	0	0	0	0	0	0	0	0	0
1285	0	0	0	0	0	0	0	0	0	0	0	0
1286	0	0	0	0	0	0	0	0	0	0	0	0
1287	0	0	0	0	0	0	0	0	0	0	0	0
1288	0	0	0	0	0	0	0	0	0	0	0	0
1289	0	0	0	0	0	0	0	1	0	0	0	1
1290	0	0	0	1	0	7	0	0	0	0	0	8
1291	0	0	0	0	0	0	0	0	0	0	0	0
1292	0	0	0	1	0	0	0	0	0	0	0	1
1293	0	0	0	2	0	2	0	0	0	1	0	5
1294	0	0	0	0	0	0	0	0	0	0	0	0
1295	0	0	0	0	0	0	0	0	0	0	0	0
1296	0	0	0	0	0	0	0	0	0	0	0	0
1297	0	0	0	0	0	0	0	0	0	0	0	0
1298	0	0	0	0	0	0	0	0	0	0	0	0
1299	0	0	0	0	0	0	0	0	0	0	0	0
1300	0	0	0	0	0	0	0	0	0	0	0	0
1301	0	0	0	0	0	1	0	0	0	0	0	1
1302	0	0	0	0	0	0	0	0	0	0	0	0
1303	0	0	0	0	0	1	0	0	0	0	0	1
1304	0	10	0	0	0	0	0	0	0	0	0	10
1305	0	0	0	0	0	0	0	0	0	0	0	0
1306	0	0	0	0	1	0	0	0	0	0	1	0
1307	0	0	0	0	0	0	0	0	0	0	0	0
1308	0	0	0	0	0	0	0	0	0	0	0	0
1309	0	0	0	0	0	0	0	0	0	0	0	0
1310	0	0	0	0	0	0	0	0	0	0	0	0
1311	0	0	0	0	0	0	0	0	0	0	0	0
1312	0	0	0	0	0	0	0	0	0	0	0	0
1313	0	0	0	0	0	0	0	0	0	0	0	0
1314	0	0	0	0	0	0	0	0	0	0	0	0
1315	0	0	0	0	0	0	0	0	0	0	0	0
1316	0	0	0	0	0	0	0	0	0	0	0	0
1317	0	0	0	0	0	0	0	0	0	0	0	0
1318	0	0	0	0	0	0	0	0	0	0	0	0
1319	0	0	0	0	0	0	0	0	0	0	0	0
1320	0	0	0	0	0	0	0	0	0	0	0	0
1321	0	0	0	0	0	0	0	0	0	0	0	0
1322	0	0	0	0	0	0	0	0	0	0	0	0
1323	0	0	0	0	0	0	0	0	0	0	0	0
1324	0	0	0	0	0	0	0	0	0	0	0	0
1325	0	0	0	0	0	0	0	0	0	0	0	0
1326	0	0	0	2	0	0	0	0	0	0	0	2
1327	0	0	0	0	0	0	0	0	0	0	0	0
1328	0	0	0	0	0	0	0	0	0	0	0	0
1329	0	0	0	0	0	3	0	0	0	0	0	3
1330	0	0	0	0	0	0	0	0	0	0	0	0
1331	0	0	0	0	0	0	0	0	0	0	0	0
1332	0	0	0	0	0	0	0	0	0	0	0	0
1333	0	0	0	0	0	0	0	0	0	0	0	0
1334	0	0	0	0	0	0	0	0	0	0	0	0
1335	0	0	0	0	0	0	0	0	0	0	0	0
1336	0	0	0	0	0	0	0	0	0	0	0	0
1337	0	0	0	0	0	0	0	0	0	0	0	0
1338	0	0	0	0	0	13	0	0	0	0	0	13
1339	0	0	3	0	0	0	0	0	0	0	3	0
1340	0	0	0	0	0	0	0	0	0	0	0	0
1341	0	0	0	0	0	0	0	0	0	0	0	0
1342	0	0	0	0	0	0	0	0	0	0	0	0
1343	0	0	0	0	0	0	0	0	0	0	0	0
1344	0	0	0	0	0	0	0	0	0	0	0	0
1345	0	0	0	0	0	0	0	0	0	0	0	0
1346	0	0	0	0	0	0	0	0	0	0	0	0
1347	0	0	0	0	0	0	0	0	0	0	0	0
1348	0	0	0	0	0	0	0	0	0	0	0	0
1349	0	0	0	0	0	0	0	0	0	0	0	0
1350	0	0	0	0	0	0	0	0	0	0	0	0
1351	0	0	0	0	0	0	0	0	0	0	0	0
1352	0	0	0	0	0	0	0	0	0	0	0	0
1353	0	0	0	0	0	0	0	0	0	0	0	0
1354	0	0	0	0	0	0	0	0	0	0	0	0
1355	0	0	0	0	0	0	0	0	0	0	0	0
1356	0	0	0	0	0	0	0	0	0	0	0	0
1357	0	0	0	0	0	0	0	0	0	0	0	0
1358	0	0	0	0	0	0	0	0	0	0	0	0
1359	0	0	0	0	0	0	0	0	0	0	0	0
1360	0	0	0	0	0	0	0	0	0	0	0	0
1361	0	0	0	0	0	0	0	0	0	0	0	0
1362	0	0	0	0	0	0	0	0	0	0	0	0
1363	0	0	0	0	0	0	0	0	0	0	0	0
1364	0	0	0	0	0	0	0	0	0	0	0	0
1365	0	0	0	0	0	0	0	0	0	0	0	0
1366	0	0	0	0	0	0	0	0	0	0	0	0
1367	0	0	0	0	0	0	0	0	0	0	0	0
1368	0	0	0	0	0	0	0	0	0	0	0	0
1369	9	0	0	0	0	0	0	0	0	0	9	0
1370	0	0	0	0	0	0	0	0	0	0	0	0
1371	0	0	0	0	0	0	0	0	0	0	0	0
1372	0	0	0	0	0	0	0	0	0	0	0	0
1373	0	0	0	0	0	0	0	0	0	0	0	0
1374	0	0	0	0	0	0	0	0	0	0	0	0
1375	0	0	0	0	0	0	0	0	0	0	0	0
1376	0	0	0	0	0	0	0	0	0	0	0	0
1377	0	0	0	0	0	0	0	0	0	0	0	0
1378	0	0	0	0	0	0	0	0	0	0	0	0
1379	0	0	0	1	0	1	0	0	0	0	0	2
1380	0	0	0	0	0	0	0	0	0	0	0	0
1381	0	0	0	0	0	0	0	0	0	0	0	0
1382	0	0	0	0	0	0	1	0	0	0	1	0
1383	0	0	0	0	0	0	0	0	0	0	0	0
1384	0	0	0	0	0	0	0	0	0	0	0	0
1385	0	0	0	0	0	0	0	0	0	0	0	0
1386	0	1	0	0	0	0	0	0	0	0	0	1
1387	0	0	0	0	0	0	0	0	0	0	0	0
1388	0	0	0	0	0	0	0	0	0	0	0	0
1389	0	0	0	0	0	0	0	0	0	0	0	0
1390	0	0	0	0	0	0	0	0	0	0	0	0
1391	0	0	0	0	0	0	0	0	0	0	0	0
1392	0	0	0	0	0	0	0	0	0	0	0	0
1393	0	0	0	0	0	0	0	0	0	0	0	0
1394	0	0	0	0	0	0	0	0	0	0	0	0
1395	0	0	0	0	0	0	0	0	0	0	0	0
1396	0	0	0	0	0	0	0	0	0	0	0	0
1397	0	0	0	0	0	0	0	0	0	0	0	0
1398	0	0	0	0	0	0	0	0	0	0	0	0
1399	0	0	0	0	0	0	0	0	0	0	0	0
1400	0	0	0	0	0	0	0	0	0	0	0	0
1401	0	0	0	0	0	0	0	0	0	0	0	0
1402	0	0	0	0	0	0	0	0	0	0	0	0
1403	0	0	0	0	0	0	0	0	0	0	0	0
1404	0	0	0	0	0	0	0	0	0	0	0	0
1405	0	0	0	0	0	0	0	0	0	0	0	0
1406	0	0	0	0	0	0	0	0	0	0	0	0
1407	0	1	0	1	0	0	0	3	0	0	0	5
1408	0	0	0	0	0	0	0	0	0	0	0	0
1409	0	0	0	0	0	0	0	0	0	0	0	0
1410	0	0	0	0	0	0	0	0	0	0	0	0
1411	0	0	0	0	0	0	0	0	0	0	0	0
1412	0	0	0	0	0	0	0	0	0	0	0	0
1413	0	0	0	0	0	0	0	0	0	0	0	0
1414	0	0	0	0	0	0	0	0	0	0	0	0
1415	0	0	0	0	0	0	0	0	0	0	0	0
1416	0	0	0	0	0	0	0	0	0	0	0	0
1417	0	0	0	0	0	0	0	0	0	0	0	0
1418	0	0	0	0	0	0	0	0	0	0	0	0
1419	0	0	0	0	0	0	0	0	0	0	0	0
1420	0	0	0	0	0	0	0	0	0	0	0	0
1421	0	0	0	0	0	0	0	0	0	0	0	0
1422	0	0	0	0	0	0	0	0	0	0	0	0
1423	0	0	0	0	0	0	0	0	0	0	0	0
1424	0	0	0	0	0	0	0	0	0	0	0	0
1425	0	0	0	0	0	0	0	0	0	0	0	0
1426	0	0	0	0	0	0	0	0	0	0	0	0
1427	0	0	0	0	0	0	0	0	0	0	0	0
1428	0	0	0	0	0	0	0	0	0	0	0	0
1429	0	0	0	0	0	0	0	0	0	0	0	0
1430	0	0	0	0	0	0	0	0	0	0	0	0
1431	0	0	0	0	0	0	0	0	0	0	0	0
1432	0	0	0	0	0	0	0	0	0	0	0	0
1433	0	0	0	0	0	0	0	0	0	0	0	0
1434	0	0	0	0	0	0	0	0	0	0	0	0
1435	0	0	0	0	1	0	0	0	0	0	1	0
1436	0	0	0	0	0	0	0	0	0	0	0	0
1437	0	0	0	0	0	0	0	0	0	0	0	0
1438	0	0	0	0	0	0	0	0	0	0	0	0
1439	0	0	0	0	0	0	0	0	0	0	0	0
1440	0	0	0	0	0	1	0	0	0	0	0	1
1441	0	0	0	0	0	0	0	0	0	0	0	0
1442	0	0	0	0	0	0	0	0	0	0	0	0
1443	0	0	0	0	0	0	0	0	0	0	0	0
1444	0	0	0	0	0	0	0	0	0	31	0	31
1445	0	0	0	0	0	0	0	0	0	0	0	0
1446	0	1	0	0	0	0	0	0	0	1	0	2
1447	0	0	0	0	0	0	0	0	0	0	0	0
1448	0	0	0	0	0	0	0	0	0	0	0	0
1449	0	0	0	0	0	1	0	0	0	0	0	1
1450	0	0	0	0	0	0	0	5	0	0	0	5
1451	0	0	0	0	0	0	0	0	0	0	0	0
1452	0	0	0	0	0	0	0	0	0	0	0	0
1453	0	0	0	0	0	0	0	0	0	0	0	0
1454	0	0	0	0	0	0	0	1	0	0	0	1
1455	0	0	0	0	0	0	0	0	0	0	0	0
1456	0	0	0	0	0	0	0	0	0	0	0	0
1457	0	0	0	0	0	0	0	0	0	0	0	0
1458	0	0	0	0	0	0	0	0	0	0	0	0
1459	0	0	0	0	0	0	0	0	0	0	0	0
1460	0	0	0	0	0	0	0	0	0	0	0	0
1461	0	0	0	0	0	0	0	0	0	0	0	0
1462	0	0	0	0	0	0	0	0	0	0	0	0
1463	0	0	0	0	0	0	0	0	0	0	0	0
1464	0	0	0	0	0	0	0	0	0	0	0	0
1465	0	0	0	0	0	0	0	0	0	0	0	0
1466	0	0	0	0	0	0	0	0	0	0	0	0
1467	0	0	0	0	0	0	0	0	0	0	0	0
1468	0	0	0	0	0	0	0	0	0	0	0	0
1469	0	0	0	2	0	0	0	0	0	0	0	2
1470	0	0	0	0	0	0	0	0	0	0	0	0
1471	0	0	0	0	0	0	0	0	0	0	0	0
1472	0	0	0	0	0	0	0	0	0	0	0	0
1473	0	0	0	0	0	0	0	0	0	0	0	0
1474	0	0	0	0	0	0	0	0	0	0	0	0
1475	0	0	0	0	0	0	0	0	0	0	0	0
1476	0	0	0	1	0	0	0	0	0	0	0	1
1477	0	0	0	0	0	0	0	0	0	0	0	0
1478	0	0	0	0	0	0	0	0	0	0	0	0
1479	0	0	0	0	0	0	0	0	0	0	0	0
1480	0	0	0	0	0	0	0	0	0	0	0	0
1481	0	0	0	0	0	1	0	0	0	0	0	1
1482	0	0	0	0	0	0	0	0	0	0	0	0
1483	0	0	0	0	0	0	0	0	0	0	0	0
1484	0	0	0	0	0	0	0	0	0	0	0	0
1485	0	0	0	0	0	0	0	0	0	0	0	0
1486	0	0	0	0	0	0	0	0	0	0	0	0
1487	0	0	0	1	0	0	0	1	0	2	0	4
1488	0	0	0	0	0	0	0	0	0	1	0	1
1489	0	0	0	0	0	0	0	0	0	0	0	0
1490	0	0	0	0	0	0	0	0	0	0	0	0
1491	0	0	0	0	0	0	0	0	0	0	0	0
1492	0	0	0	0	0	0	0	0	1	0	1	0
1493	0	0	0	0	0	0	0	0	0	0	0	0
1494	0	0	0	0	0	0	0	1	0	0	0	1
1495	0	0	0	0	0	0	0	0	0	0	0	0
1496	0	0	0	0	0	0	0	0	0	0	0	0
1497	0	0	0	0	0	0	0	0	0	0	0	0
1498	0	0	0	0	0	0	0	0	0	0	0	0
1499	0	0	0	0	0	0	0	0	0	0	0	0
1500	0	0	0	0	0	0	0	0	0	0	0	0
1501	0	0	0	0	0	0	0	1	0	0	0	1
1502	0	0	0	3	0	0	0	0	0	0	0	3
1503	0	0	0	0	0	0	0	0	0	0	0	0
1504	0	0	0	0	0	0	0	0	0	0	0	0
1505	0	0	0	0	0	0	0	0	0	0	0	0
1506	0	0	0	0	0	0	0	0	0	0	0	0
1507	0	0	0	0	0	0	0	0	0	0	0	0
1508	0	0	0	0	0	0	0	0	0	0	0	0
1509	0	0	0	0	0	0	0	0	0	1	0	1
1510	0	0	0	0	0	0	0	0	0	0	0	0
1511	0	0	0	0	0	0	0	0	0	0	0	0
1512	0	1	0	1	0	1	0	0	0	0	0	3
1513	1	0	5	0	12	0	0	0	0	0	18	0
1514	0	0	0	0	0	0	0	0	0	0	0	0
1515	0	0	0	0	0	0	0	0	0	0	0	0
1516	0	0	0	0	0	0	0	0	0	0	0	0
1517	0	0	0	0	0	0	0	1	0	0	0	1
1518	0	0	0	0	0	0	0	0	0	0	0	0
1519	0	0	0	0	0	0	0	0	0	0	0	0
1520	0	0	0	0	0	0	0	0	0	0	0	0
1521	0	0	0	0	0	0	0	0	0	0	0	0
1522	0	0	0	0	0	0	0	0	0	0	0	0
1523	0	0	0	0	0	0	0	0	0	0	0	0
1524	0	0	0	0	0	0	0	0	0	0	0	0
1525	0	0	1	0	0	0	0	0	0	0	1	0
1526	0	1	0	0	0	0	0	0	0	0	0	1
1527	0	0	0	0	0	0	0	0	0	0	0	0
1528	0	0	0	0	0	0	0	0	0	0	0	0
1529	0	0	0	0	0	1	0	0	0	0	0	1
1530	0	0	0	3	0	0	0	0	0	0	0	3
1531	0	0	1	0	0	0	0	0	0	0	1	0
1532	0	0	0	0	0	0	0	0	0	0	0	0
1533	0	0	0	0	0	0	0	0	0	0	0	0
1534	0	0	0	0	0	0	0	0	0	0	0	0
1535	0	0	0	0	0	0	0	0	0	0	0	0
1536	0	0	0	0	0	0	0	0	0	0	0	0
1537	0	0	0	0	0	0	0	0	0	0	0	0
1538	0	0	0	0	0	0	0	0	0	0	0	0
1539	0	0	0	0	0	0	0	0	0	0	0	0
1540	0	0	0	0	0	0	0	0	0	0	0	0
1541	0	0	0	0	0	0	0	0	0	0	0	0
1542	0	0	0	0	0	0	0	0	0	0	0	0
1543	0	0	0	0	0	0	0	0	0	0	0	0
1544	0	3	0	0	0	0	0	0	0	0	0	3
1545	0	0	0	0	0	0	0	0	0	0	0	0
1546	0	0	0	0	0	0	0	0	0	0	0	0
1547	0	0	0	0	0	0	0	0	0	0	0	0
1548	0	0	0	0	0	0	0	0	0	0	0	0
1549	0	0	0	0	0	0	0	0	0	0	0	0
1550	0	0	0	0	0	0	0	0	0	0	0	0
1551	0	0	0	0	0	0	0	0	0	0	0	0
1552	0	0	0	0	0	0	0	0	0	0	0	0
1553	0	0	0	0	0	0	0	0	0	0	0	0
1554	0	0	0	0	0	0	0	0	0	0	0	0
1555	0	0	0	0	0	0	0	0	0	0	0	0
1556	0	8	0	0	0	0	0	0	0	0	0	8
1557	0	0	0	0	0	0	0	0	0	0	0	0
1558	0	0	0	0	2	0	0	0	0	0	2	0
1559	0	0	0	0	0	0	0	0	0	0	0	0
1560	0	0	0	1	0	0	0	0	0	0	0	1
1561	3	0	0	0	0	0	1	0	0	0	4	0
1562	2	0	0	0	0	0	0	0	0	0	2	0
1563	0	0	0	0	0	0	0	0	0	0	0	0
1564	0	0	0	0	0	0	0	0	0	0	0	0
1565	0	0	0	0	0	0	0	1	0	0	0	1
1566	0	0	0	0	0	0	0	0	0	0	0	0
1567	0	0	0	0	0	0	0	0	0	0	0	0
1568	0	0	0	0	0	0	0	0	0	0	0	0
1569	0	0	0	0	0	0	0	0	0	0	0	0
1570	0	0	0	0	0	0	0	0	0	0	0	0
1571	0	0	0	0	0	0	0	0	0	0	0	0
1572	0	0	0	0	0	0	0	0	0	0	0	0
1573	0	0	0	0	0	0	0	0	0	0	0	0
1574	0	0	0	0	0	6	0	0	0	0	0	6
1575	0	0	0	0	0	0	0	0	0	0	0	0
1576	1	0	0	0	0	0	0	0	0	0	1	0
1577	0	0	0	0	0	0	0	0	0	0	0	0
1578	0	0	0	0	0	0	0	0	0	0	0	0
1579	0	0	0	0	0	0	0	0	0	0	0	0
1580	0	0	0	0	0	0	0	0	0	0	0	0
1581	0	0	0	0	0	0	0	0	0	0	0	0
1582	0	1	0	0	0	0	0	0	0	0	0	1
1583	0	0	0	0	0	0	0	0	0	0	0	0
1584	0	0	0	0	0	0	0	0	0	0	0	0
1585	0	0	0	0	0	0	0	0	0	0	0	0
1586	0	0	0	0	0	0	0	0	0	0	0	0
1587	0	0	0	0	0	0	0	0	0	0	0	0
1588	0	0	0	0	0	0	0	0	0	0	0	0
1589	0	0	0	0	0	0	0	0	0	0	0	0
1590	0	1	0	0	0	0	0	0	0	0	0	1
1591	0	0	0	0	0	0	0	0	0	0	0	0
1592	0	0	0	0	0	0	0	0	0	0	0	0
1593	0	0	0	0	0	0	0	0	0	0	0	0
1594	0	0	0	0	0	0	0	0	0	1	0	1
1595	0	0	0	0	0	0	0	0	0	0	0	0
1596	0	0	0	0	0	0	0	0	0	0	0	0
1597	0	0	0	0	0	0	0	0	0	0	0	0
1598	0	0	0	0	0	0	0	0	0	0	0	0
1599	0	0	0	0	0	0	0	0	0	0	0	0
1600	0	0	0	0	0	0	0	0	0	0	0	0
1601	0	0	0	0	0	0	0	0	0	0	0	0
1602	0	0	0	0	0	0	0	0	0	0	0	0
1603	0	0	0	0	0	0	0	0	0	0	0	0
1604	0	0	0	0	0	0	0	1	0	0	0	1
1605	0	0	0	0	0	0	0	0	0	0	0	0
1606	0	0	0	0	0	0	0	0	1	0	1	0
1607	0	0	0	0	0	0	0	0	0	0	0	0
1608	0	0	0	0	0	0	0	0	0	0	0	0
1609	0	0	0	0	0	0	0	0	0	0	0	0
1610	0	0	0	0	0	0	0	0	0	0	0	0
1611	0	0	0	0	0	0	0	0	0	0	0	0
1612	0	0	0	0	0	0	0	0	0	0	0	0
1613	0	0	0	0	0	0	0	0	0	0	0	0
1614	0	0	0	0	0	0	0	0	0	0	0	0
1615	0	0	0	0	0	0	0	0	0	0	0	0
1616	0	0	0	0	0	0	0	0	0	0	0	0
1617	0	0	0	0	0	0	0	0	0	0	0	0
1618	0	0	0	0	0	0	0	0	0	0	0	0
1619	0	0	0	0	0	3	0	0	0	0	0	3
1620	0	6	0	1	0	0	0	0	0	0	0	7
1621	0	0	0	0	0	0	0	0	0	0	0	0
1622	0	0	0	0	0	0	0	0	0	0	0	0
1623	0	0	0	0	0	0	0	0	0	0	0	0
1624	0	0	0	0	1	0	0	0	0	0	1	0
1625	0	0	0	0	0	0	0	0	0	0	0	0
1626	0	0	0	0	0	0	0	0	0	0	0	0
1627	0	0	0	0	0	0	0	0	0	0	0	0
1628	0	0	0	0	0	0	0	0	0	0	0	0
1629	0	1	0	0	0	0	0	0	0	0	0	1
1630	0	0	0	0	0	0	0	0	0	0	0	0
1631	0	0	0	0	0	0	0	0	0	0	0	0
1632	0	0	0	0	0	0	0	0	0	0	0	0
1633	0	0	0	0	0	0	0	0	0	0	0	0
1634	0	1	0	0	0	1	0	0	0	0	0	2
1635	0	0	0	0	0	0	0	0	0	0	0	0
1636	21	0	1	0	12	0	4	0	0	0	38	0
1637	0	0	0	0	0	0	0	0	0	0	0	0
1638	0	0	0	0	0	0	0	0	0	0	0	0
1639	0	0	0	0	0	0	0	0	0	0	0	0
1640	0	0	0	0	0	0	0	0	0	0	0	0
1641	0	0	0	0	0	0	0	0	0	0	0	0
1642	11	0	1	0	0	0	0	0	0	0	12	0
1643	0	0	0	0	0	0	0	0	0	0	0	0
1644	0	0	0	0	0	0	0	0	0	0	0	0
1645	0	0	0	0	0	0	0	0	0	0	0	0
1646	0	0	0	0	0	0	0	0	0	0	0	0
1647	0	0	0	0	0	0	0	1	0	0	0	1
1648	0	0	0	0	0	0	0	0	0	0	0	0
1649	0	0	0	0	0	0	0	1	0	0	0	1
1650	0	0	0	0	0	0	0	0	0	0	0	0
1651	0	0	0	0	3	0	0	0	0	0	3	0
1652	0	0	0	0	0	0	0	0	0	0	0	0
1653	0	0	0	0	0	0	0	0	0	0	0	0
1654	0	0	0	0	0	0	0	0	0	0	0	0
1655	0	0	0	0	0	0	0	0	0	0	0	0
1656	0	0	0	0	0	37	0	0	0	0	0	37
1657	16	0	4	0	10	0	3	0	9	0	42	0
1658	0	0	0	0	0	0	0	0	0	1	0	1
1659	0	0	0	0	0	0	0	0	0	0	0	0
1660	0	0	0	0	0	0	0	0	0	0	0	0
1661	0	0	0	0	0	0	0	0	0	0	0	0
1662	0	0	0	0	0	0	0	0	0	0	0	0
1663	0	0	0	0	0	0	0	0	0	0	0	0
1664	0	0	0	0	0	0	0	0	0	0	0	0
1665	0	1	0	1	0	1	0	0	0	0	0	3
1666	0	0	0	0	6	0	0	0	1	0	7	0
1667	0	0	0	0	0	0	0	0	0	0	0	0
1668	0	0	0	0	0	0	0	0	0	0	0	0
1669	0	0	0	0	0	0	0	0	0	0	0	0
1670	0	0	0	0	0	0	0	0	0	0	0	0
1671	0	0	0	0	0	0	0	0	0	0	0	0
1672	0	0	0	0	0	0	0	0	0	0	0	0
1673	0	0	0	0	0	0	0	0	0	0	0	0
1674	0	0	0	0	0	0	0	0	0	0	0	0
1675	1	0	1	0	1	0	0	0	1	0	4	0
1676	0	0	0	0	0	0	0	0	0	0	0	0
1677	0	0	0	0	0	0	0	0	0	0	0	0
1678	0	0	0	0	0	0	0	0	0	0	0	0
1679	0	0	0	0	0	0	0	0	0	0	0	0
1680	0	0	0	0	0	0	0	0	0	0	0	0
1681	0	0	0	0	0	0	0	0	0	0	0	0
1682	0	0	0	0	0	0	0	0	0	0	0	0
1683	0	0	0	0	0	0	0	0	0	0	0	0
1684	0	0	0	0	0	0	0	0	0	0	0	0
1685	0	0	0	0	0	0	0	0	0	0	0	0
1686	0	0	0	0	0	0	0	0	0	0	0	0
1687	0	0	0	0	0	0	0	0	0	0	0	0
1688	0	0	0	0	0	0	0	0	0	0	0	0
1689	0	0	0	0	0	0	0	0	0	0	0	0
1690	0	0	0	0	0	0	0	0	0	0	0	0
1691	0	0	0	0	0	1	0	0	0	0	0	1
1692	0	0	0	0	0	0	0	0	0	0	0	0
1693	0	0	0	0	0	0	0	0	1	0	1	0
1694	0	0	0	0	0	0	0	0	0	0	0	0
1695	0	0	0	0	0	0	0	0	0	0	0	0
1696	0	0	0	0	0	0	0	0	0	0	0	0
1697	0	0	0	0	0	0	0	0	0	0	0	0
1698	0	0	0	0	0	0	0	0	0	0	0	0
1699	0	0	0	0	0	0	1	0	0	0	1	0
1700	0	0	0	1	0	7	0	0	0	0	0	8
1701	0	0	0	0	0	0	0	0	0	0	0	0
1702	0	0	0	0	0	0	0	0	0	0	0	0
1703	0	0	0	0	0	0	0	0	0	0	0	0
1704	0	0	0	0	0	0	0	0	0	0	0	0
1705	0	0	0	0	0	0	0	0	0	0	0	0
1706	0	0	0	0	0	0	0	0	0	0	0	0
1707	0	0	0	1	0	0	0	0	0	0	0	1
1708	0	1	0	0	0	0	0	0	0	0	0	1
1709	0	0	0	0	0	0	0	0	0	0	0	0
1710	0	0	0	0	0	0	0	0	0	0	0	0
1711	0	0	0	0	0	0	0	0	0	0	0	0
1712	0	0	0	0	0	0	0	0	0	0	0	0
1713	0	0	0	0	0	1	0	0	0	0	0	1
1714	0	0	0	0	0	0	0	0	0	0	0	0
1715	0	0	0	0	0	0	0	0	0	0	0	0
1716	0	0	0	0	0	0	0	0	0	0	0	0
1717	0	0	0	0	0	0	0	0	0	0	0	0
1718	0	0	0	0	0	0	0	0	0	0	0	0
1719	0	0	0	0	0	0	0	0	0	0	0	0
1720	0	0	0	0	0	0	0	0	0	0	0	0
1721	0	0	0	0	0	0	0	0	0	0	0	0
1722	0	2	0	0	0	0	0	0	0	1	0	3
1723	0	0	0	0	0	0	0	0	0	0	0	0
1724	0	0	0	0	0	0	0	0	0	0	0	0
1725	0	0	0	0	0	0	0	0	0	0	0	0
1726	0	0	0	0	0	1	0	0	0	0	0	1
1727	0	0	0	0	0	0	0	0	0	0	0	0
1728	0	0	0	0	0	0	0	0	0	0	0	0
1729	0	0	0	0	0	0	0	0	0	0	0	0
1730	0	0	0	0	0	0	0	0	0	0	0	0
1731	0	0	0	0	0	0	0	0	0	0	0	0
1732	0	0	0	0	0	0	0	0	0	0	0	0
1733	0	0	0	0	0	0	0	0	0	0	0	0
1734	0	0	0	0	0	0	0	0	0	0	0	0
1735	0	1	0	0	0	0	0	0	0	0	0	1
1736	0	0	0	0	0	0	0	0	0	0	0	0
1737	0	0	0	0	0	0	0	0	0	0	0	0
1738	0	0	0	0	0	0	0	0	0	0	0	0
1739	0	0	0	0	0	0	0	0	0	0	0	0
1740	0	0	0	1	0	0	0	0	0	0	0	1
1741	0	0	0	0	0	0	0	0	0	0	0	0
1742	0	0	0	0	0	0	0	0	0	0	0	0
1743	0	0	0	0	0	0	0	0	0	0	0	0
1744	0	0	0	0	0	0	0	0	0	0	0	0
1745	0	0	0	0	0	0	0	0	0	0	0	0
1746	0	0	0	0	0	0	0	0	0	0	0	0
1747	0	0	0	0	0	0	0	0	0	0	0	0
1748	0	0	0	0	0	0	0	0	0	0	0	0
1749	0	9	0	1	0	0	0	1	0	0	0	11
1750	0	0	0	0	0	0	0	0	0	0	0	0
1751	0	0	0	0	0	0	0	0	0	0	0	0
1752	0	0	0	0	0	0	0	0	0	0	0	0
1753	0	0	0	0	0	0	0	0	0	0	0	0
1754	0	0	0	0	0	0	0	0	0	0	0	0
1755	0	0	0	0	0	0	0	0	0	0	0	0
1756	0	0	0	0	0	0	0	0	0	0	0	0
1757	0	0	0	0	0	0	0	0	0	0	0	0
1758	0	0	0	0	0	0	0	0	0	0	0	0
1759	0	0	0	0	0	0	0	0	0	0	0	0
1760	0	0	0	2	0	0	0	0	0	0	0	2
1761	0	0	0	0	0	0	0	0	0	0	0	0
1762	0	0	0	0	0	0	0	0	0	0	0	0
1763	0	0	0	0	0	0	0	0	0	0	0	0
1764	0	0	0	0	0	0	0	1	0	0	0	1
1765	0	0	0	0	0	0	0	0	0	0	0	0
1766	0	0	0	0	0	0	0	0	0	0	0	0
1767	0	0	0	0	0	0	0	0	0	0	0	0
1768	0	0	0	0	0	0	0	0	0	0	0	0
1769	0	0	0	0	0	0	0	0	0	0	0	0
1770	0	0	0	0	0	1	0	0	0	0	0	1
1771	0	0	0	0	0	0	0	0	0	0	0	0
1772	0	0	0	0	0	0	0	0	0	0	0	0
1773	0	1	0	0	0	0	0	1	0	0	0	2
1774	0	0	0	0	0	0	0	0	0	0	0	0
1775	0	0	0	0	0	0	0	0	0	0	0	0
1776	0	0	0	0	0	0	0	0	0	0	0	0
1777	0	0	0	0	0	0	0	0	0	0	0	0
1778	0	0	0	0	0	0	0	0	0	0	0	0
1779	0	0	0	0	0	0	0	0	0	0	0	0
1780	0	0	0	0	0	0	0	0	0	0	0	0
1781	0	0	0	0	0	0	0	0	0	0	0	0
1782	0	0	0	0	0	0	0	0	0	0	0	0
1783	0	0	0	0	0	0	0	0	0	0	0	0
1784	0	0	0	0	0	0	0	0	0	0	0	0
1785	0	14	0	1	0	0	0	0	0	0	0	15
1786	0	0	0	0	0	0	0	0	0	0	0	0
1787	0	0	0	0	0	0	0	0	0	0	0	0
1788	0	0	0	0	0	0	0	0	0	0	0	0
1789	0	0	0	0	0	0	0	0	0	0	0	0
1790	0	0	0	1	0	0	0	0	0	0	0	1
1791	0	5	0	0	0	0	0	0	0	0	0	5
1792	0	0	0	0	0	0	0	0	0	0	0	0
1793	0	0	0	0	0	0	0	0	0	0	0	0
1794	0	0	0	0	0	0	0	0	0	0	0	0
1795	0	0	1	0	0	0	0	0	0	0	1	0
1796	0	0	0	0	0	0	0	0	0	0	0	0
1797	0	20	0	1	0	0	0	0	0	0	0	21
1798	0	0	0	0	0	0	0	0	0	0	0	0
1799	0	0	0	0	0	0	0	0	0	0	0	0
1800	0	0	0	0	0	0	0	0	0	0	0	0
1801	0	0	0	0	0	0	0	0	0	0	0	0
1802	0	0	0	0	0	0	0	0	0	0	0	0
1803	0	5	0	0	0	0	0	0	0	0	0	5
1804	0	0	0	0	0	0	0	0	0	0	0	0
1805	0	0	0	0	0	0	0	0	0	0	0	0
1806	0	0	0	0	0	0	0	0	0	0	0	0
1807	0	0	0	0	0	0	0	0	0	0	0	0
1808	0	0	0	0	0	0	0	0	0	0	0	0
1809	0	0	0	0	0	0	0	0	0	0	0	0
1810	0	0	0	0	0	0	0	0	0	0	0	0
1811	0	0	5	0	181	0	127	0	150	0	463	0
1812	0	0	0	0	0	0	0	0	0	0	0	0
1813	0	0	0	0	0	0	0	0	0	0	0	0
1814	0	0	0	0	0	0	0	0	0	0	0	0
1815	0	0	0	0	0	0	0	0	0	0	0	0
1816	0	0	0	0	0	0	0	0	0	0	0	0
1817	0	0	0	0	0	0	0	0	0	0	0	0
1818	0	0	0	0	0	0	0	0	0	0	0	0
1819	0	0	0	0	0	0	0	0	0	0	0	0
1820	0	0	0	0	0	1	0	0	0	0	0	1
1821	0	0	0	0	0	0	0	0	0	0	0	0
1822	0	0	0	0	0	0	0	0	0	0	0	0
1823	0	0	0	0	0	0	0	0	0	0	0	0
1824	0	0	0	0	0	0	0	0	0	0	0	0
1825	0	0	0	0	0	0	0	0	0	0	0	0
1826	0	1	0	0	0	0	0	0	0	0	0	1
1827	0	0	0	0	0	0	0	0	0	0	0	0
1828	0	0	0	0	0	0	0	0	0	0	0	0
1829	0	0	0	0	0	0	0	0	0	0	0	0
1830	0	0	0	0	0	0	0	0	0	0	0	0
1831	0	0	0	0	0	0	0	0	0	0	0	0
1832	0	0	0	0	0	0	0	0	0	0	0	0
1833	0	0	0	0	0	0	0	0	0	0	0	0
1834	0	0	0	0	0	0	0	0	0	0	0	0
1835	0	0	0	0	0	0	0	0	0	0	0	0
1836	0	0	0	1	0	0	0	0	0	0	0	1
1837	0	0	0	0	0	0	0	0	0	0	0	0
1838	0	14	0	1	0	0	0	0	0	0	0	15
1839	0	0	0	0	0	0	0	0	0	0	0	0
1840	0	0	0	0	0	0	0	0	0	0	0	0
1841	0	1	0	0	0	0	0	0	0	0	0	1
1842	0	0	0	0	0	0	0	0	0	0	0	0
1843	0	0	0	0	0	0	0	0	0	0	0	0
1844	0	0	0	1	0	0	0	0	0	0	0	1
1845	0	0	0	0	0	0	0	0	0	0	0	0
1846	0	0	0	0	0	0	0	0	0	0	0	0
1847	0	0	0	0	0	0	0	0	0	0	0	0
1848	0	0	0	0	0	0	0	0	0	0	0	0
1849	0	0	0	0	0	0	0	0	0	0	0	0
1850	0	0	0	0	0	0	0	0	0	0	0	0
1851	0	0	0	0	0	0	0	0	0	0	0	0
1852	0	0	0	0	0	0	0	0	0	0	0	0
1853	0	0	0	0	0	0	0	0	0	0	0	0
1854	0	0	0	0	0	0	0	0	0	0	0	0
1855	0	0	0	0	0	0	0	0	0	0	0	0
1856	0	0	0	0	0	0	0	0	0	0	0	0
1857	0	0	0	0	0	0	0	0	0	0	0	0
1858	0	0	0	0	0	0	0	1	0	0	0	1
1859	0	0	0	0	0	0	0	0	0	0	0	0
1860	0	0	0	0	0	0	0	0	0	0	0	0
1861	0	0	0	0	0	0	0	0	0	0	0	0
1862	0	19	0	0	0	0	0	0	0	0	0	19
1863	0	9	0	0	0	0	0	1	0	0	0	10
1864	49	0	2	0	12	0	1	0	4	0	68	0
1865	0	0	0	0	0	0	0	1	0	0	0	1
1866	0	0	0	0	0	0	0	0	0	0	0	0
1867	0	0	0	0	0	0	0	0	0	0	0	0
1868	0	0	0	0	0	0	0	0	0	0	0	0
1869	0	0	0	0	0	0	0	0	0	0	0	0
1870	0	0	0	0	0	0	0	0	0	0	0	0
1871	0	0	0	0	0	0	0	0	0	0	0	0
1872	0	0	0	0	0	0	0	0	0	0	0	0
1873	0	0	0	0	0	0	0	0	0	0	0	0
1874	0	0	0	0	0	0	0	0	0	0	0	0
1875	0	0	0	0	0	0	0	0	0	0	0	0
1876	0	0	0	0	0	0	0	0	0	0	0	0
1877	0	0	0	0	0	0	0	0	0	0	0	0
1878	0	0	0	0	0	0	0	0	0	0	0	0
1879	0	0	0	0	0	0	0	3	0	0	0	3
1880	0	0	0	0	0	0	0	0	0	0	0	0
1881	0	0	0	0	0	0	0	0	0	0	0	0
1882	0	0	0	0	0	0	0	0	0	0	0	0
1883	0	0	0	0	0	0	0	0	0	0	0	0
1884	0	0	0	0	0	0	0	0	0	0	0	0
1885	0	0	0	0	0	0	0	0	0	0	0	0
1886	0	20	0	0	0	0	0	0	1	0	1	20
1887	0	0	0	2	0	2	0	40	0	0	0	44
1888	0	0	0	0	0	0	0	0	0	0	0	0
1889	0	0	0	0	0	0	0	0	0	0	0	0
1890	0	0	0	0	0	0	0	0	0	0	0	0
1891	4	0	0	0	0	0	0	0	0	0	4	0
1892	0	0	0	0	0	0	0	0	0	0	0	0
1893	0	0	0	0	0	0	0	0	0	0	0	0
1894	0	0	3	0	0	0	0	0	0	0	3	0
1895	0	0	0	0	0	0	0	0	0	0	0	0
1896	0	1	0	0	0	0	0	1	0	0	0	2
1897	2	0	2	0	2	0	2	0	0	0	8	0
1898	0	0	0	0	0	0	0	0	0	0	0	0
1899	0	0	0	0	0	0	0	0	0	0	0	0
1900	1	0	0	0	0	0	0	0	0	0	1	0
1901	0	0	0	0	0	0	0	2	0	0	0	2
1902	0	0	0	0	0	0	0	0	0	0	0	0
1903	1	0	0	0	0	0	0	0	0	0	1	0
1904	0	0	0	0	0	0	0	0	0	0	0	0
1905	0	0	0	0	0	0	0	0	0	0	0	0
1906	0	0	1	0	0	0	0	0	69	0	70	0
1907	0	0	0	0	0	0	0	0	0	0	0	0
1908	0	0	0	0	0	0	0	0	0	0	0	0
1909	0	0	1	0	0	0	0	0	0	0	1	0
1910	0	0	0	0	0	0	0	0	0	0	0	0
1911	0	0	0	0	0	0	0	0	0	0	0	0
1912	0	0	0	0	3	0	0	0	0	0	3	0
1913	0	0	0	0	0	0	0	0	0	0	0	0
1914	0	0	0	0	0	0	0	0	0	0	0	0
1915	0	0	0	0	0	0	0	0	0	0	0	0
1916	0	0	0	0	0	0	0	0	0	0	0	0
1917	0	0	0	0	0	3	0	0	0	0	0	3
1918	0	0	0	0	0	0	0	0	0	0	0	0
1919	0	0	0	0	0	0	0	0	0	0	0	0
1920	0	0	0	0	0	0	0	0	0	0	0	0
1921	0	0	0	0	0	0	0	0	0	0	0	0
1922	0	0	0	0	0	0	0	0	0	0	0	0
1923	0	0	0	0	0	0	0	0	0	0	0	0
1924	0	0	0	0	0	0	0	0	0	0	0	0
1925	0	0	0	0	0	0	0	0	0	0	0	0
1926	0	0	0	0	0	0	0	0	0	0	0	0
1927	0	0	0	0	0	0	0	0	0	0	0	0
1928	0	0	0	0	0	0	0	0	0	0	0	0
1929	0	0	0	0	0	0	0	0	0	0	0	0
1930	0	0	0	0	0	0	0	0	0	0	0	0
1931	0	0	0	0	0	0	0	0	0	0	0	0
1932	0	0	0	0	0	0	0	0	0	0	0	0
1933	0	0	0	0	0	0	0	0	0	0	0	0
1934	0	0	0	0	0	0	0	0	0	0	0	0
1935	0	0	0	0	0	0	0	0	0	0	0	0
1936	0	0	0	0	0	0	0	0	0	0	0	0
1937	0	0	0	0	0	0	0	0	0	0	0	0
1938	0	0	0	0	0	0	0	0	0	0	0	0
1939	0	0	0	0	0	0	0	0	0	0	0	0
1940	0	0	0	0	0	0	0	0	0	0	0	0
1941	0	0	0	0	0	0	0	0	0	0	0	0
1942	0	0	0	0	0	0	0	0	0	0	0	0
1943	0	0	0	0	0	0	0	0	0	0	0	0
1944	0	0	0	0	0	0	0	0	0	0	0	0
1945	0	0	0	0	0	0	0	0	0	0	0	0
1946	0	0	0	0	0	0	0	0	0	0	0	0
1947	0	0	0	0	0	0	0	0	0	0	0	0
1948	0	0	0	0	0	0	0	0	0	0	0	0
1949	0	0	0	0	0	0	0	0	0	0	0	0
1950	0	0	0	0	0	0	0	0	0	0	0	0
1951	0	0	0	0	0	0	0	0	0	0	0	0
1952	0	0	0	0	0	0	0	0	0	0	0	0
1953	0	0	0	0	0	0	0	0	0	0	0	0
1954	0	0	0	0	0	0	0	0	0	0	0	0
1955	0	0	0	0	0	0	0	0	0	0	0	0
1956	0	0	0	0	0	0	0	0	0	0	0	0
1957	0	0	0	0	0	0	0	0	0	0	0	0
1958	0	0	0	0	0	0	0	0	0	0	0	0
1959	0	0	0	0	0	0	0	0	0	0	0	0
1960	0	0	0	0	0	0	0	0	0	0	0	0
1961	0	0	0	0	0	0	0	0	0	0	0	0
1962	0	0	0	0	0	0	0	0	0	0	0	0
1963	0	0	0	0	0	0	0	0	0	0	0	0
1964	0	0	0	0	0	0	0	0	0	0	0	0
1965	0	0	0	0	0	0	0	0	0	0	0	0
1966	0	0	0	0	0	0	0	0	0	0	0	0
1967	0	0	0	0	0	0	0	0	0	0	0	0
1968	0	0	0	0	0	0	0	0	0	0	0	0
1969	0	0	0	0	0	0	0	0	0	0	0	0
1970	0	0	0	0	0	0	0	0	0	0	0	0
1971	0	0	0	0	0	0	0	0	0	0	0	0
1972	0	0	0	0	0	0	0	0	0	0	0	0
1973	0	0	0	0	0	0	0	0	0	0	0	0
1974	0	0	0	0	0	0	0	0	0	0	0	0
1975	0	0	0	0	0	0	0	0	0	0	0	0
1976	0	0	0	0	0	0	0	0	0	0	0	0
1977	0	0	0	0	0	0	0	0	0	0	0	0
1978	0	0	0	0	0	0	0	0	0	0	0	0
1979	0	0	0	0	0	0	0	0	0	0	0	0
1980	0	0	0	0	0	0	0	0	0	0	0	0
1981	0	0	0	0	0	0	0	0	0	0	0	0
1982	0	0	0	0	0	0	0	0	0	0	0	0
1983	0	0	0	0	0	0	0	0	0	0	0	0
1984	0	0	0	0	0	0	0	0	0	0	0	0
1985	0	0	0	0	0	0	0	0	0	0	0	0
1986	0	0	0	0	0	0	0	0	0	1	0	1
1987	0	0	0	0	0	0	0	0	0	0	0	0
1988	0	0	0	0	0	0	0	0	0	0	0	0
1989	0	0	0	0	0	0	0	0	0	0	0	0
1990	0	0	0	0	0	0	0	0	0	0	0	0
1991	0	0	0	0	0	0	0	0	0	0	0	0
1992	0	0	0	0	0	0	0	0	0	0	0	0
1993	0	0	0	0	0	0	0	0	0	0	0	0
1994	0	0	0	0	0	0	0	0	0	0	0	0
1995	0	0	0	0	0	0	0	0	0	0	0	0
1996	1	0	0	0	0	0	0	0	0	0	1	0
1997	0	0	0	0	0	0	0	0	0	0	0	0
1998	0	0	0	0	0	0	0	0	0	36	0	36
1999	0	0	0	0	0	0	0	0	1	0	1	0
2000	0	0	0	0	0	0	0	0	0	0	0	0
2001	0	0	0	0	0	0	0	0	0	0	0	0
2002	0	0	0	0	0	0	0	0	0	0	0	0
2003	0	0	0	0	0	0	0	0	0	0	0	0
2004	0	0	0	0	0	0	0	0	0	0	0	0
2005	0	0	0	0	0	0	0	0	0	0	0	0
2006	0	0	0	0	0	0	0	0	0	0	0	0
2007	0	0	0	0	0	0	0	0	0	0	0	0
2008	0	0	0	0	0	0	0	0	0	0	0	0
2009	0	0	0	0	0	0	0	0	0	0	0	0
2010	0	0	0	0	0	0	0	0	0	0	0	0
2011	0	0	0	0	0	0	0	0	0	0	0	0
2012	0	1	0	0	0	0	0	0	0	0	0	1
2013	0	0	0	0	0	0	0	0	0	0	0	0
2014	0	0	0	0	0	0	0	0	0	0	0	0
2015	0	1	5	0	0	0	0	0	0	0	5	1
2016	0	0	0	0	0	0	0	0	0	0	0	0
2017	0	0	0	0	0	0	0	0	0	0	0	0
2018	0	0	0	0	0	0	0	0	0	0	0	0
2019	0	0	0	0	0	0	0	0	0	0	0	0
2020	0	0	0	0	0	0	0	0	0	0	0	0
2021	0	0	0	0	0	0	0	0	0	0	0	0
2022	0	0	0	0	0	0	0	0	0	0	0	0
2023	0	0	0	0	0	0	0	0	0	0	0	0
2024	0	0	0	0	0	0	0	0	0	0	0	0
2025	0	0	0	0	0	0	0	0	0	0	0	0
2026	0	0	0	0	0	0	0	0	0	0	0	0
2027	0	5	0	0	0	0	0	0	0	0	0	5
2028	0	0	0	0	0	1	0	0	0	0	0	1
2029	0	0	0	0	0	0	0	0	0	0	0	0
2030	0	0	0	0	0	0	0	0	0	0	0	0
2031	0	0	0	0	0	0	0	0	0	0	0	0
2032	0	0	2	0	0	0	0	0	0	0	2	0
2033	0	0	0	0	0	0	0	0	0	0	0	0
2034	0	0	0	0	0	0	0	0	0	0	0	0
2035	0	0	0	0	0	0	0	0	0	0	0	0
2036	0	0	0	0	0	0	0	0	0	0	0	0
2037	0	0	0	0	0	0	0	0	0	0	0	0
2038	0	0	1	0	0	0	0	0	0	0	1	0
2039	0	0	0	0	0	0	0	0	0	0	0	0
2040	0	0	0	0	0	0	0	0	0	0	0	0
2041	0	0	0	0	0	0	0	0	0	0	0	0
2042	0	0	0	0	0	0	0	0	0	0	0	0
2043	0	0	0	0	0	0	0	0	0	0	0	0
2044	0	0	0	0	0	0	0	0	0	0	0	0
2045	0	5	0	0	0	0	0	0	0	0	0	5
2046	0	0	0	0	0	0	0	0	0	0	0	0
2047	0	0	0	0	0	0	0	0	0	0	0	0
2048	0	0	0	0	0	0	0	0	0	0	0	0
2049	0	0	0	0	0	0	0	0	0	0	0	0
2050	0	0	0	0	0	0	0	0	0	0	0	0
2051	0	0	0	0	0	0	0	0	0	0	0	0
2052	0	0	0	0	0	0	0	0	0	0	0	0
2053	0	0	0	0	0	0	0	0	0	0	0	0
2054	0	0	0	0	0	0	0	0	0	0	0	0
2055	0	0	0	1	0	0	0	0	0	0	0	1
2056	0	0	0	0	0	0	0	0	0	0	0	0
2057	0	0	0	0	0	0	0	0	0	0	0	0
2058	0	0	0	0	0	0	0	0	0	0	0	0
2059	0	0	0	0	0	0	0	0	0	0	0	0
2060	0	0	0	0	0	0	0	0	0	0	0	0
2061	0	0	0	0	0	0	0	0	0	0	0	0
2062	0	0	0	0	0	0	0	0	0	0	0	0
2063	0	0	0	0	0	0	0	0	0	0	0	0
2064	0	0	0	0	0	0	0	0	0	0	0	0
2065	0	0	1	0	0	0	0	0	0	0	1	0
2066	0	0	0	0	0	0	0	0	0	0	0	0
2067	0	0	0	0	0	0	0	0	0	0	0	0
2068	0	0	0	0	0	0	0	0	0	0	0	0
2069	0	0	0	0	0	0	0	0	0	0	0	0
2070	0	0	0	0	0	0	0	0	0	0	0	0
2071	0	0	0	0	0	0	0	0	0	0	0	0
2072	0	0	0	0	0	0	0	0	0	0	0	0
2073	0	0	0	0	0	0	0	0	0	1	0	1
2074	0	0	0	0	0	0	0	0	0	0	0	0
2075	0	0	0	0	0	0	0	0	0	0	0	0
2076	0	0	0	0	0	0	0	0	0	0	0	0
2077	0	0	0	0	0	0	0	0	0	0	0	0
2078	0	0	0	0	0	0	0	0	0	0	0	0
2079	0	0	0	0	0	0	0	0	0	0	0	0
2080	0	0	0	0	0	0	0	0	0	0	0	0
2081	0	0	0	0	0	0	0	0	0	0	0	0
2082	0	0	0	0	0	0	0	0	0	0	0	0
2083	0	0	0	0	0	0	0	0	0	0	0	0
2084	0	0	0	0	0	0	0	0	0	0	0	0
2085	0	0	0	0	0	0	0	0	0	0	0	0
2086	0	0	0	0	0	0	0	0	0	0	0	0
2087	0	0	0	0	0	0	0	0	0	0	0	0
2088	0	0	0	0	0	0	0	5	0	0	0	5
2089	0	0	0	0	0	0	0	0	0	0	0	0
2090	0	0	0	0	0	0	0	0	0	0	0	0
2091	0	0	0	0	0	0	0	0	0	0	0	0
2092	0	0	0	0	0	0	0	0	0	0	0	0
2093	0	0	0	0	0	0	0	0	0	0	0	0
2094	0	0	0	0	0	0	0	0	0	0	0	0
2095	0	0	0	0	0	0	0	0	0	0	0	0
2096	0	0	0	0	0	0	0	4	0	0	0	4
2097	0	0	0	0	0	0	0	0	0	0	0	0
2098	0	0	0	0	0	0	0	0	0	0	0	0
2099	0	0	0	0	0	0	0	0	0	0	0	0
2100	0	0	0	0	0	0	0	0	0	0	0	0
2101	0	0	0	0	0	0	0	0	0	0	0	0
2102	0	0	0	0	0	0	0	0	0	0	0	0
2103	0	0	0	0	0	0	0	0	0	0	0	0
2104	0	0	0	0	0	0	0	0	0	0	0	0
2105	0	0	0	0	0	0	0	0	0	0	0	0
2106	0	0	0	0	0	0	0	0	0	0	0	0
2107	0	0	0	0	0	0	2	0	0	0	2	0
2108	0	0	0	0	0	0	0	0	0	0	0	0
2109	0	0	0	0	0	0	0	0	0	0	0	0
2110	0	0	0	0	0	0	0	0	0	0	0	0
2111	0	0	0	0	0	0	0	0	0	0	0	0
2112	0	0	0	0	0	0	0	0	0	0	0	0
2113	0	0	0	0	0	0	0	0	0	0	0	0
2114	0	0	0	0	0	0	0	0	0	0	0	0
2115	0	0	0	0	0	1	0	0	0	0	0	1
2116	0	0	0	0	0	0	0	0	0	0	0	0
2117	0	1	0	0	0	0	0	0	0	0	0	1
2118	0	0	0	0	0	0	0	0	0	0	0	0
2119	0	0	0	1	0	0	0	0	0	0	0	1
2120	0	0	0	0	0	0	0	0	0	0	0	0
2121	0	0	0	0	0	0	0	0	0	0	0	0
2122	0	0	0	0	0	0	0	0	0	0	0	0
2123	0	0	0	0	0	0	0	0	0	0	0	0
2124	0	0	0	0	0	1	0	2	0	0	0	3
2125	2	0	1	0	3	0	0	0	0	0	6	0
2126	0	0	0	0	0	0	0	1	0	0	0	1
2127	0	0	0	0	0	0	0	0	0	0	0	0
2128	0	0	0	0	0	0	0	0	0	0	0	0
2129	0	0	0	0	0	0	0	0	0	0	0	0
2130	0	2	0	0	0	0	0	0	0	0	0	2
2131	0	0	0	0	0	0	0	0	0	0	0	0
2132	0	0	0	0	0	0	0	0	0	0	0	0
2133	0	0	0	0	0	0	0	0	0	0	0	0
2134	0	0	0	0	0	0	0	0	0	0	0	0
2135	0	0	0	0	0	0	0	0	0	0	0	0
2136	0	0	0	0	0	0	0	0	0	0	0	0
2137	0	0	0	0	0	0	0	0	0	0	0	0
2138	0	0	0	0	0	0	0	0	0	0	0	0
2139	0	0	0	0	0	0	0	0	0	0	0	0
2140	0	0	1	0	0	0	0	0	0	0	1	0
2141	0	0	0	0	0	0	0	0	0	0	0	0
2142	0	0	0	0	0	0	0	0	0	0	0	0
2143	0	0	0	1	0	0	0	0	0	0	0	1
2144	0	0	0	1	0	0	0	0	0	0	0	1
2145	0	0	0	0	0	1	0	0	0	0	0	1
2146	0	0	0	0	1	0	0	0	0	0	1	0
2147	0	0	0	0	0	0	0	0	0	0	0	0
2148	0	0	0	0	0	0	0	0	0	0	0	0
2149	0	0	0	0	0	0	0	0	0	0	0	0
2150	0	0	0	0	0	0	0	0	0	0	0	0
2151	0	0	0	0	0	0	0	0	0	0	0	0
2152	0	0	0	0	0	0	0	0	0	0	0	0
2153	0	0	0	0	0	0	0	0	0	0	0	0
2154	0	12	0	0	0	0	0	0	0	0	0	12
2155	0	0	0	0	0	0	0	0	1	0	1	0
2156	0	0	0	0	0	0	0	0	0	0	0	0
2157	0	0	0	0	0	0	0	0	0	0	0	0
2158	1	0	1	0	0	0	0	0	0	0	2	0
2159	0	0	0	0	0	0	0	0	0	0	0	0
2160	0	0	0	0	0	0	0	0	0	0	0	0
2161	0	0	0	0	0	0	0	0	0	0	0	0
2162	0	0	0	0	0	0	0	0	0	0	0	0
2163	0	0	0	0	0	1	0	0	0	0	0	1
2164	0	0	0	0	0	0	0	0	0	0	0	0
2165	0	0	0	0	0	0	0	0	0	0	0	0
2166	0	0	0	0	0	0	0	0	0	0	0	0
2167	0	0	0	0	0	0	0	0	0	0	0	0
2168	0	0	0	0	0	0	0	0	0	0	0	0
2169	0	0	0	0	0	0	0	0	0	0	0	0
2170	0	0	0	0	0	0	0	0	0	0	0	0
2171	0	0	0	0	0	0	0	0	0	0	0	0
2172	0	0	0	0	0	0	0	0	0	0	0	0
2173	0	0	0	0	0	0	0	0	0	0	0	0
2174	0	0	0	0	0	0	0	0	0	0	0	0
2175	0	0	0	0	0	0	0	0	0	0	0	0
2176	0	0	0	0	0	0	0	0	0	0	0	0
2177	0	0	0	0	0	0	0	0	0	0	0	0
2178	0	0	0	0	0	0	0	0	0	0	0	0
2179	72	0	5	0	8	0	2	0	0	0	87	0
2180	0	0	0	0	0	0	0	0	0	0	0	0
2181	0	0	0	0	0	0	0	0	0	0	0	0
2182	0	1	0	0	0	0	0	0	0	0	0	1
2183	0	0	0	0	0	0	0	0	0	2	0	2
2184	0	0	0	0	0	0	0	0	0	0	0	0
2185	0	0	0	0	0	0	0	0	0	0	0	0
2186	0	0	0	0	0	0	0	0	0	0	0	0
2187	0	0	0	0	0	0	0	0	0	0	0	0
2188	0	0	0	0	0	0	0	0	0	0	0	0
2189	0	0	0	0	0	0	0	0	0	0	0	0
2190	0	0	0	0	0	0	0	0	0	0	0	0
2191	0	0	0	0	0	0	0	0	0	0	0	0
2192	0	0	0	0	0	0	0	0	0	0	0	0
2193	0	0	0	0	0	0	0	0	0	0	0	0
2194	0	0	0	0	0	0	0	0	0	0	0	0
2195	0	0	0	0	0	0	0	0	0	0	0	0
2196	0	0	0	0	0	0	0	0	0	0	0	0
2197	0	0	0	0	0	0	0	0	0	0	0	0
2198	0	0	0	0	0	0	0	1	0	0	0	1
2199	0	0	0	0	0	0	0	0	0	0	0	0
2200	0	0	0	0	0	0	0	0	0	0	0	0
2201	0	0	0	0	0	0	0	0	0	0	0	0
2202	0	0	0	0	0	0	0	0	0	0	0	0
2203	0	0	0	0	1	0	3	0	0	0	4	0
2204	0	0	0	0	0	0	0	0	0	0	0	0
2205	0	0	0	0	0	0	0	0	0	0	0	0
2206	1	0	0	0	0	0	0	0	0	0	1	0
2207	0	0	0	0	0	0	0	0	0	0	0	0
2208	0	0	0	0	0	0	0	0	0	0	0	0
2209	0	0	0	0	0	0	0	0	0	0	0	0
2210	0	0	0	0	0	0	0	0	0	0	0	0
2211	0	0	0	0	0	0	0	0	0	0	0	0
2212	0	0	0	0	0	0	0	0	0	0	0	0
2213	0	0	0	0	1	0	2	0	0	0	3	0
2214	0	0	0	0	0	0	0	0	0	0	0	0
2215	0	0	0	0	0	0	0	0	0	0	0	0
2216	0	0	0	0	0	0	0	0	0	0	0	0
2217	0	0	0	0	0	0	0	0	0	0	0	0
2218	0	0	0	0	0	0	0	0	0	0	0	0
2219	0	0	0	0	0	0	0	0	0	0	0	0
2220	0	0	0	0	0	0	0	0	0	0	0	0
2221	2	0	0	0	1	0	0	0	0	0	3	0
2222	0	0	0	0	0	0	0	0	0	0	0	0
2223	0	0	0	0	0	0	0	0	0	0	0	0
2224	0	0	0	0	0	0	16	0	0	0	16	0
2225	0	0	0	0	0	0	0	0	0	0	0	0
2226	0	0	0	0	0	0	0	0	0	0	0	0
2227	0	0	0	0	0	0	0	0	0	0	0	0
2228	0	0	0	0	0	0	0	0	0	0	0	0
2229	0	0	0	0	0	0	0	0	0	0	0	0
2230	0	0	0	0	0	0	0	0	0	0	0	0
2231	0	0	0	0	0	0	0	0	0	0	0	0
2232	0	0	0	0	0	0	0	0	0	0	0	0
2233	0	0	0	0	0	0	0	0	0	0	0	0
2234	0	0	0	0	0	0	0	0	0	0	0	0
2235	0	0	0	0	0	0	0	0	0	0	0	0
2236	40	0	0	0	0	1	0	0	0	0	40	1
2237	0	0	0	0	0	1	0	0	0	0	0	1
2238	0	0	0	0	0	0	0	0	0	0	0	0
2239	0	0	0	0	0	0	0	0	0	0	0	0
2240	0	0	0	0	0	0	0	0	0	0	0	0
2241	0	0	0	1	0	0	0	0	0	0	0	1
2242	0	0	0	0	0	0	0	0	0	0	0	0
2243	0	0	0	3	0	0	0	0	0	0	0	3
2244	0	0	0	0	0	0	0	0	0	0	0	0
2245	19	0	0	0	0	0	0	0	0	0	19	0
2246	0	0	0	0	0	0	0	0	0	0	0	0
2247	0	0	0	0	0	0	0	0	0	0	0	0
2248	0	0	0	0	0	0	0	0	0	0	0	0
2249	0	0	0	0	0	0	0	0	0	0	0	0
2250	0	0	0	0	0	0	0	0	0	0	0	0
2251	0	0	0	0	0	0	0	0	0	0	0	0
2252	0	0	0	0	0	0	0	0	0	0	0	0
2253	0	0	0	0	0	3	0	0	0	0	0	3
2254	0	0	0	0	0	0	0	0	0	0	0	0
2255	0	0	0	0	0	0	0	0	0	0	0	0
2256	0	0	0	0	0	0	0	0	0	0	0	0
2257	0	0	0	0	0	0	0	0	0	0	0	0
2258	0	0	0	0	0	0	0	0	0	0	0	0
2259	0	0	0	0	0	0	0	0	0	0	0	0
2260	0	0	0	0	0	0	0	0	0	0	0	0
2261	0	0	0	0	0	0	0	0	0	0	0	0
2262	0	0	0	0	0	0	0	0	0	0	0	0
2263	0	0	0	0	0	0	0	0	0	0	0	0
2264	0	0	0	0	0	0	0	0	0	0	0	0
2265	0	0	0	0	0	0	0	0	0	0	0	0
2266	0	0	1	0	0	0	0	0	0	0	1	0
2267	0	0	0	0	0	0	0	0	0	0	0	0
2268	0	0	0	0	0	0	0	0	0	0	0	0
2269	0	0	0	0	0	0	0	0	5	0	5	0
2270	0	0	0	0	0	0	0	0	0	0	0	0
2271	0	0	0	0	0	0	0	0	0	0	0	0
2272	0	0	0	0	0	0	0	0	0	0	0	0
2273	0	0	0	0	0	0	0	0	0	0	0	0
2274	0	0	0	0	0	0	0	0	0	0	0	0
2275	0	0	0	0	0	0	0	0	0	0	0	0
2276	0	1	0	0	0	0	0	0	0	0	0	1
2277	0	0	0	0	0	0	0	0	0	0	0	0
2278	0	0	0	0	0	0	0	0	0	0	0	0
2279	0	0	0	0	0	0	0	0	0	0	0	0
2280	0	0	0	0	0	0	0	0	0	0	0	0
2281	0	0	0	0	0	1	0	1	0	1	0	3
2282	0	0	0	0	0	0	0	0	0	0	0	0
2283	0	0	0	0	0	0	0	0	0	0	0	0
2284	0	0	0	0	0	0	0	0	0	0	0	0
2285	0	0	0	0	0	0	0	0	0	0	0	0
2286	0	0	0	0	0	0	0	0	0	0	0	0
2287	0	0	0	0	0	0	0	0	0	0	0	0
2288	0	0	0	0	0	0	0	0	0	0	0	0
2289	0	0	0	0	0	0	0	0	0	0	0	0
2290	0	0	0	0	0	0	0	0	0	0	0	0
2291	0	0	0	0	0	0	0	0	0	0	0	0
2292	0	0	0	1	0	0	0	0	0	0	0	1
2293	0	0	0	0	0	0	0	0	0	0	0	0
2294	0	0	0	0	0	0	0	0	0	1	0	1
2295	0	0	0	0	0	0	0	0	0	0	0	0
2296	0	0	0	0	0	0	0	0	0	0	0	0
2297	0	0	0	0	0	0	0	0	0	0	0	0
2298	0	0	0	0	0	0	0	0	0	0	0	0
2299	0	0	0	0	0	0	0	0	0	0	0	0
2300	0	0	0	0	0	0	0	0	0	0	0	0
2301	0	0	0	0	0	0	0	0	0	0	0	0
2302	0	0	0	0	0	0	0	0	0	0	0	0
2303	0	0	0	0	0	1	0	0	0	0	0	1
2304	0	0	0	0	0	0	0	0	0	0	0	0
2305	0	0	0	0	0	0	0	0	1	0	1	0
2306	0	0	0	0	0	0	0	0	0	0	0	0
2307	0	0	0	0	0	0	0	0	0	0	0	0
2308	0	0	0	0	2	0	0	0	0	0	2	0
2309	0	0	1	0	0	0	0	0	0	0	1	0
2310	0	0	0	0	0	0	0	0	0	0	0	0
2311	0	0	0	0	0	0	0	0	0	0	0	0
2312	0	0	0	0	0	0	0	0	0	0	0	0
2313	0	0	0	0	0	0	0	0	0	0	0	0
2314	0	0	1	0	0	0	0	0	30	0	31	0
2315	0	0	0	0	0	0	0	0	0	0	0	0
2316	0	0	0	0	0	0	0	0	0	0	0	0
2317	0	0	0	0	0	0	0	0	0	0	0	0
2318	0	0	0	0	0	0	0	0	0	0	0	0
2319	0	0	0	0	0	0	0	0	0	0	0	0
2320	0	0	0	0	0	0	0	0	0	0	0	0
2321	0	0	0	0	0	0	0	0	0	0	0	0
2322	0	0	0	0	0	0	0	0	0	0	0	0
2323	0	0	0	0	1	0	0	0	0	0	1	0
2324	0	0	0	0	0	0	0	0	0	0	0	0
2325	0	0	0	0	0	0	0	0	0	0	0	0
2326	0	0	0	0	0	0	0	0	2	0	2	0
2327	0	0	0	0	0	0	0	0	0	0	0	0
2328	0	0	0	0	0	0	0	0	0	0	0	0
2329	0	0	0	0	0	0	0	0	0	0	0	0
2330	0	0	0	0	0	0	0	0	0	0	0	0
2331	0	0	0	0	0	0	0	0	0	0	0	0
2332	0	0	0	0	0	0	0	0	0	0	0	0
2333	0	0	0	0	0	1	0	0	0	0	0	1
2334	0	0	0	0	0	0	0	0	0	0	0	0
2335	0	0	0	0	0	0	0	0	0	0	0	0
2336	0	0	0	0	0	0	0	0	0	0	0	0
2337	0	0	0	0	0	0	0	0	0	0	0	0
2338	0	0	0	0	0	0	0	0	0	0	0	0
2339	0	0	0	0	0	0	0	0	0	0	0	0
2340	0	0	0	0	0	0	0	0	0	1	0	1
2341	0	0	0	0	0	0	0	0	0	0	0	0
2342	0	0	0	0	0	0	0	0	0	0	0	0
2343	0	0	0	0	0	0	0	0	0	0	0	0
2344	0	0	0	0	0	0	0	0	0	0	0	0
2345	0	0	0	0	0	0	0	0	0	0	0	0
2346	0	0	0	0	0	0	0	0	0	0	0	0
2347	0	0	0	0	0	0	0	0	0	0	0	0
2348	0	0	0	0	0	0	0	0	0	0	0	0
2349	0	0	0	0	0	0	0	0	0	0	0	0
2350	0	0	0	0	0	0	0	0	0	0	0	0
2351	0	0	0	0	0	0	0	0	0	0	0	0
2352	0	0	0	0	0	0	0	0	0	0	0	0
2353	0	0	0	0	0	0	0	0	0	0	0	0
2354	0	0	0	0	0	0	0	0	0	0	0	0
2355	0	0	0	0	0	0	0	0	0	0	0	0
2356	0	0	0	0	0	0	0	0	0	0	0	0
2357	0	0	0	0	0	0	0	0	0	0	0	0
2358	0	0	0	0	0	0	0	0	0	0	0	0
2359	0	0	0	0	0	0	0	0	0	0	0	0
2360	0	0	0	0	0	0	0	0	0	0	0	0
2361	0	0	0	0	0	0	0	0	0	0	0	0
2362	0	0	0	0	0	0	0	0	0	0	0	0
2363	0	1	0	0	0	0	0	0	0	0	0	1
2364	0	0	0	0	0	0	0	0	0	0	0	0
2365	0	0	0	0	0	0	0	0	0	0	0	0
2366	0	0	0	0	0	0	0	0	0	0	0	0
2367	0	0	0	0	0	0	0	0	0	0	0	0
2368	0	0	0	0	0	0	0	0	0	0	0	0
2369	0	0	0	0	0	0	0	0	0	0	0	0
2370	0	0	0	0	0	0	0	0	0	0	0	0
2371	45	0	24	0	173	0	122	0	148	0	512	0
2372	0	0	0	0	0	0	0	0	0	0	0	0
2373	0	0	0	0	0	0	0	2	0	0	0	2
2374	0	0	0	0	0	0	0	0	0	0	0	0
2375	0	0	0	0	0	0	0	15	0	0	0	15
2376	0	0	0	0	0	0	0	0	0	0	0	0
2377	0	8	0	0	0	0	0	0	0	0	0	8
2378	0	0	0	0	0	0	0	0	0	0	0	0
2379	0	0	0	0	0	0	0	0	0	0	0	0
2380	0	0	0	0	0	0	0	0	1	0	1	0
2381	0	0	0	0	0	0	0	0	0	0	0	0
2382	0	0	0	0	0	0	0	0	0	0	0	0
2383	0	0	0	1	0	0	0	0	0	0	0	1
2384	0	0	0	0	0	0	0	0	0	0	0	0
2385	0	0	0	0	0	0	0	0	0	0	0	0
2386	0	0	0	0	0	0	0	0	0	0	0	0
2387	0	0	0	0	0	0	0	0	0	0	0	0
2388	0	0	0	0	0	0	0	0	0	0	0	0
2389	0	0	0	0	0	0	0	0	0	1	0	1
2390	0	0	0	0	0	0	0	0	0	0	0	0
2391	0	0	0	0	0	0	0	0	0	0	0	0
2392	0	0	0	0	0	0	0	0	0	0	0	0
2393	0	0	0	0	0	0	0	0	0	0	0	0
2394	0	0	0	0	0	0	0	0	0	0	0	0
2395	0	0	0	0	0	0	0	0	0	0	0	0
2396	0	0	0	0	0	1	0	0	0	0	0	1
2397	0	0	0	0	0	0	0	0	0	0	0	0
2398	0	0	0	0	0	0	0	0	0	0	0	0
2399	0	0	0	0	0	0	0	0	0	0	0	0
2400	0	0	0	0	0	0	0	0	0	0	0	0
2401	0	0	0	0	0	0	0	0	0	0	0	0
2402	0	0	0	0	0	0	0	0	0	0	0	0
2403	0	0	0	0	0	0	0	0	0	0	0	0
2404	0	0	0	0	0	0	0	0	0	0	0	0
2405	0	0	0	0	0	0	0	0	0	0	0	0
2406	0	0	0	0	0	0	0	0	0	0	0	0
2407	0	0	0	0	0	0	0	0	0	0	0	0
2408	0	0	0	0	0	0	0	0	0	0	0	0
2409	0	0	0	0	0	0	0	0	0	0	0	0
2410	0	0	0	0	0	0	0	0	0	0	0	0
2411	0	0	0	0	0	0	0	0	0	0	0	0
2412	0	0	0	0	0	0	0	0	0	0	0	0
2413	0	0	0	0	0	0	0	0	0	0	0	0
2414	0	0	0	0	0	0	0	0	0	0	0	0
2415	0	0	0	0	0	0	0	0	0	0	0	0
2416	0	0	0	0	0	0	0	0	0	0	0	0
2417	0	0	0	0	0	0	0	0	0	0	0	0
2418	0	1	0	0	0	0	0	0	0	0	0	1
2419	0	0	0	0	1	0	0	0	0	0	1	0
2420	0	0	0	0	0	0	0	0	0	0	0	0
2421	0	0	0	0	0	0	0	0	0	0	0	0
2422	0	0	0	0	0	0	0	0	0	1	0	1
2423	0	0	0	0	0	0	0	0	0	0	0	0
2424	0	0	0	0	0	0	0	0	0	0	0	0
2425	0	0	0	0	0	0	4	0	0	0	4	0
2426	0	0	0	0	0	0	0	0	0	0	0	0
2427	0	0	0	0	0	0	0	0	0	0	0	0
2428	0	0	0	0	0	0	0	0	0	0	0	0
2429	0	0	0	0	0	0	0	0	0	0	0	0
2430	0	0	0	0	0	0	0	0	0	0	0	0
2431	0	0	0	0	0	0	0	0	0	0	0	0
2432	0	0	0	0	0	0	0	0	0	0	0	0
2433	0	0	0	0	0	0	0	0	0	0	0	0
2434	0	0	0	0	0	0	0	0	0	0	0	0
2435	0	0	0	0	0	0	0	0	0	0	0	0
2436	0	0	0	0	0	0	0	0	0	0	0	0
2437	0	0	0	0	0	0	0	0	0	0	0	0
2438	0	0	0	0	0	0	0	0	0	0	0	0
2439	0	19	0	2	0	0	0	0	0	0	0	21
2440	0	0	0	0	0	0	0	0	0	0	0	0
2441	0	0	0	0	0	0	0	0	0	0	0	0
2442	0	1	0	0	0	0	0	0	0	0	0	1
2443	0	0	0	0	0	0	0	0	0	0	0	0
2444	0	0	0	0	0	0	0	0	0	0	0	0
2445	0	0	0	0	0	0	0	0	0	0	0	0
2446	0	0	0	0	0	0	0	0	0	0	0	0
2447	0	0	0	0	0	0	0	0	0	0	0	0
2448	0	0	0	0	0	0	0	0	0	0	0	0
2449	0	0	0	0	0	0	0	0	0	0	0	0
2450	0	0	0	0	0	0	0	2	0	0	0	2
2451	0	0	0	0	0	0	0	0	0	0	0	0
2452	0	0	0	0	0	0	0	0	0	0	0	0
2453	0	0	0	0	0	0	0	0	0	0	0	0
2454	0	0	0	1	0	2	0	2	0	1	0	6
2455	0	0	0	0	0	0	9	0	0	0	9	0
2456	0	0	0	0	0	0	0	0	0	0	0	0
2457	0	0	0	0	0	0	0	0	0	0	0	0
2458	0	0	0	0	0	0	0	0	0	0	0	0
2459	0	0	0	0	0	0	0	0	0	0	0	0
2460	0	0	0	0	0	0	0	0	0	0	0	0
2461	0	0	0	0	0	0	0	5	0	0	0	5
2462	0	0	0	0	0	0	0	0	0	0	0	0
2463	0	0	0	0	0	0	0	0	0	0	0	0
2464	0	0	0	0	1	0	0	0	0	0	1	0
2465	0	0	0	0	0	0	0	0	0	0	0	0
2466	0	0	0	0	0	0	0	0	0	0	0	0
2467	0	0	0	0	0	0	0	0	31	0	31	0
2468	0	0	0	0	0	0	0	0	0	0	0	0
2469	0	0	0	0	0	0	0	0	0	0	0	0
2470	0	0	0	0	0	0	0	0	0	0	0	0
2471	0	0	0	0	0	0	0	0	0	0	0	0
2472	0	0	0	0	0	0	0	0	0	0	0	0
2473	0	0	0	0	0	0	0	0	0	0	0	0
2474	0	1	0	0	0	0	0	0	0	0	0	1
2475	0	0	0	0	0	0	0	0	0	0	0	0
2476	0	0	0	0	0	0	0	0	0	0	0	0
2477	0	0	0	0	0	0	0	0	0	0	0	0
2478	0	0	0	0	0	0	0	0	0	0	0	0
2479	0	0	0	0	1	0	0	0	1	0	2	0
2480	0	0	0	0	0	0	0	0	0	0	0	0
2481	0	0	0	0	0	0	0	0	0	0	0	0
2482	0	0	0	0	0	0	0	0	0	0	0	0
2483	0	0	0	0	0	0	0	0	0	0	0	0
2484	0	0	0	0	0	0	0	0	0	0	0	0
2485	0	0	0	0	0	0	0	0	0	0	0	0
2486	0	0	0	0	0	1	0	0	0	0	0	1
2487	0	0	0	0	0	0	0	0	0	0	0	0
2488	0	0	0	0	0	0	0	0	0	0	0	0
2489	0	0	0	0	0	0	0	0	0	0	0	0
2490	0	0	0	0	0	0	0	0	0	0	0	0
2491	0	0	0	0	0	0	0	0	0	0	0	0
2492	0	0	0	0	0	0	0	0	0	0	0	0
2493	0	0	0	0	0	0	0	0	0	0	0	0
2494	0	0	0	0	0	0	0	0	0	0	0	0
2495	0	0	0	0	0	0	0	0	0	0	0	0
2496	0	0	0	0	0	1	0	0	0	0	0	1
2497	0	0	0	0	0	0	0	0	0	0	0	0
2498	0	0	0	0	0	0	0	0	0	0	0	0
2499	0	0	0	0	0	0	0	0	0	0	0	0
2500	0	0	0	0	0	0	0	0	0	0	0	0
2501	0	0	0	0	0	0	0	0	0	0	0	0
2502	0	0	0	0	0	1	0	0	0	0	0	1
2503	0	0	0	0	0	0	0	0	0	0	0	0
2504	0	0	0	0	0	0	0	0	0	0	0	0
2505	0	0	0	0	0	0	0	0	0	0	0	0
2506	0	0	0	0	0	0	0	0	0	0	0	0
2507	0	4	0	0	0	0	0	0	0	0	0	4
2508	0	1	0	0	0	1	0	0	0	1	0	3
2509	0	0	0	0	1	0	1	0	2	0	4	0
2510	0	0	0	0	0	0	0	0	0	0	0	0
2511	0	0	0	0	0	0	0	0	0	0	0	0
2512	0	0	0	0	0	0	0	0	0	0	0	0
2513	0	0	0	0	0	0	0	0	0	0	0	0
2514	0	0	0	0	0	0	0	0	0	0	0	0
2515	0	0	0	0	0	0	0	0	0	0	0	0
2516	0	0	0	0	0	0	0	0	0	0	0	0
2517	0	0	0	0	0	1	0	0	0	0	0	1
2518	0	0	0	0	0	0	0	0	0	0	0	0
2519	0	0	0	0	0	0	0	0	0	0	0	0
2520	0	0	0	0	0	0	0	0	0	2	0	2
2521	0	0	0	0	0	0	3	0	0	0	3	0
2522	0	0	0	0	0	0	0	0	0	0	0	0
2523	0	0	0	0	0	0	0	0	0	0	0	0
2524	0	0	0	0	0	0	0	0	0	0	0	0
2525	0	0	0	0	0	0	0	0	0	0	0	0
2526	0	2	0	0	0	1	0	0	0	0	0	3
2527	0	0	0	0	0	0	0	0	0	0	0	0
2528	0	0	0	0	0	0	0	0	0	0	0	0
2529	0	0	0	1	0	0	0	0	0	0	0	1
2530	0	0	0	0	0	0	0	0	0	0	0	0
2531	0	0	0	0	0	0	0	0	0	0	0	0
2532	0	0	0	0	0	0	0	0	0	0	0	0
2533	0	0	0	0	0	0	0	0	0	0	0	0
2534	0	0	0	0	0	0	0	0	0	0	0	0
2535	0	0	0	1	0	0	0	0	0	0	0	1
2536	0	0	0	0	0	0	0	0	0	0	0	0
2537	0	0	0	0	0	0	0	0	0	0	0	0
2538	0	0	0	0	0	0	0	0	0	0	0	0
2539	0	0	0	0	0	0	0	0	0	4	0	4
2540	0	0	0	0	0	0	0	0	0	0	0	0
2541	0	0	0	0	0	2	0	0	0	0	0	2
2542	0	0	0	0	0	0	0	0	0	0	0	0
2543	0	0	0	0	0	0	0	0	0	0	0	0
2544	0	0	0	0	0	0	0	0	0	0	0	0
2545	0	0	0	0	0	0	0	0	0	0	0	0
2546	0	0	0	0	0	0	0	0	0	0	0	0
2547	0	0	0	0	0	0	0	0	0	0	0	0
2548	0	0	0	0	0	0	0	0	0	0	0	0
2549	0	0	0	0	0	0	0	0	0	0	0	0
2550	0	0	0	0	0	0	0	0	0	0	0	0
2551	1	0	0	0	0	0	0	0	0	0	1	0
2552	0	0	0	3	0	0	0	0	0	0	0	3
2553	0	0	0	0	0	0	0	0	0	0	0	0
2554	0	0	0	0	0	0	0	0	0	0	0	0
2555	0	0	0	0	0	0	0	0	0	0	0	0
2556	0	0	0	0	0	0	0	0	0	0	0	0
2557	0	0	0	0	0	0	0	1	0	0	0	1
2558	0	0	0	0	0	0	0	0	0	2	0	2
2559	0	0	0	0	0	0	0	0	0	0	0	0
2560	0	0	2	0	66	0	0	0	0	0	68	0
2561	0	0	0	0	0	0	0	0	0	0	0	0
2562	0	0	0	0	0	0	0	0	0	0	0	0
2563	0	0	0	0	0	0	1	1	0	0	1	1
2564	0	0	0	0	0	1	0	0	0	0	0	1
2565	0	0	0	0	0	0	0	0	0	0	0	0
2566	0	0	0	0	0	0	0	0	0	0	0	0
2567	0	0	0	0	0	0	0	0	0	0	0	0
2568	0	0	0	0	0	0	0	0	0	0	0	0
2569	0	0	0	0	0	0	0	0	0	0	0	0
2570	0	0	0	0	0	0	0	0	0	0	0	0
2571	0	0	0	0	0	0	0	0	0	0	0	0
2572	0	0	0	0	0	0	0	0	0	0	0	0
2573	0	0	0	0	0	0	0	0	0	0	0	0
2574	0	0	0	0	0	0	0	0	0	0	0	0
2575	0	0	0	0	1	0	0	0	0	0	1	0
2576	0	0	0	0	0	0	0	0	0	0	0	0
2577	0	0	0	0	0	0	0	0	0	0	0	0
2578	0	0	0	0	0	0	0	0	0	0	0	0
2579	0	0	0	1	0	0	0	0	0	0	0	1
2580	0	0	0	0	0	0	0	0	0	0	0	0
2581	0	0	0	0	0	0	0	0	0	0	0	0
2582	0	0	0	0	0	0	0	0	0	0	0	0
2583	0	0	0	0	0	0	0	0	0	0	0	0
2584	0	0	0	0	0	0	0	0	0	0	0	0
2585	0	0	0	0	0	0	0	0	0	0	0	0
2586	0	0	0	0	0	0	0	0	0	0	0	0
2587	0	0	0	0	0	0	0	0	0	0	0	0
2588	0	0	0	0	0	0	0	0	0	0	0	0
2589	0	0	0	0	0	0	0	0	0	0	0	0
2590	0	0	0	0	0	0	0	0	0	0	0	0
2591	0	0	0	0	0	0	0	0	0	0	0	0
2592	0	0	0	0	0	0	0	0	0	0	0	0
2593	0	0	0	0	0	0	0	0	0	0	0	0
2594	0	0	0	0	0	0	0	0	0	0	0	0
2595	0	0	0	0	0	1	0	0	0	0	0	1
2596	0	0	0	0	0	0	0	0	0	0	0	0
2597	0	0	0	0	0	0	0	0	0	0	0	0
2598	0	0	0	0	0	0	0	0	0	0	0	0
2599	0	0	0	0	0	0	0	0	0	0	0	0
2600	0	0	0	0	0	0	0	0	0	0	0	0
2601	0	0	0	0	0	0	0	0	0	0	0	0
2602	0	0	0	0	0	0	0	0	0	0	0	0
2603	0	0	0	0	0	0	0	0	0	0	0	0
2604	0	0	0	1	0	0	0	0	0	0	0	1
2605	0	0	0	0	0	0	0	0	0	0	0	0
2606	0	4	0	4	0	4	0	3	0	3	0	18
2607	0	1	0	0	0	0	0	0	0	0	0	1
2608	1	0	1	0	0	0	0	0	0	0	2	0
2609	0	0	0	0	0	0	0	0	0	0	0	0
2610	0	0	0	0	0	0	0	0	0	0	0	0
2611	0	0	0	0	0	0	0	0	0	0	0	0
2612	0	0	0	0	0	0	0	0	0	0	0	0
2613	0	0	0	0	0	0	0	0	0	0	0	0
2614	0	0	0	0	0	0	0	0	0	0	0	0
2615	0	0	0	0	0	0	0	0	0	0	0	0
2616	0	0	0	0	0	0	0	0	0	0	0	0
2617	0	0	0	0	0	0	0	0	0	0	0	0
2618	0	0	0	0	0	0	0	2	0	0	0	2
2619	0	0	0	0	0	0	0	0	0	0	0	0
2620	0	0	0	0	0	0	0	0	0	0	0	0
2621	0	0	0	0	0	0	0	0	0	0	0	0
2622	0	0	0	0	0	0	0	0	0	0	0	0
2623	0	0	0	0	0	0	0	0	0	0	0	0
2624	0	0	0	0	0	0	0	0	0	0	0	0
2625	0	0	0	0	0	0	0	0	0	0	0	0
2626	0	0	0	0	0	0	0	0	0	0	0	0
2627	0	0	0	0	0	0	0	0	0	0	0	0
2628	0	0	0	0	0	0	0	0	0	0	0	0
2629	0	0	0	0	0	0	0	1	0	0	0	1
2630	0	0	0	0	0	0	0	0	0	0	0	0
2631	0	0	0	0	0	0	0	0	0	0	0	0
2632	0	0	0	0	0	0	0	0	1	0	1	0
2633	0	0	0	0	0	0	0	0	0	0	0	0
2634	0	0	0	0	0	0	0	0	0	0	0	0
2635	0	0	0	0	0	1	0	0	0	0	0	1
2636	0	1	0	0	0	0	0	0	0	0	0	1
2637	0	0	0	0	0	0	0	0	0	0	0	0
2638	0	0	0	0	0	0	0	0	0	0	0	0
2639	0	0	0	0	0	0	0	0	0	0	0	0
2640	0	0	0	0	0	0	0	0	0	0	0	0
2641	0	0	0	0	0	0	0	0	0	0	0	0
2642	0	2	0	0	0	0	0	0	0	0	0	2
2643	0	0	0	0	0	0	0	0	0	0	0	0
2644	0	0	0	0	0	0	0	0	0	0	0	0
2645	0	1	0	4	0	0	0	0	0	0	0	5
2646	0	0	0	0	0	0	0	0	0	0	0	0
2647	0	0	0	0	0	0	0	0	0	0	0	0
2648	0	0	0	0	0	0	0	0	0	0	0	0
2649	0	0	0	0	0	0	0	0	0	0	0	0
2650	0	0	0	0	0	0	0	0	0	0	0	0
2651	0	0	0	0	0	0	0	0	0	0	0	0
2652	0	0	0	0	0	0	0	0	0	0	0	0
2653	0	0	0	0	0	0	0	0	0	0	0	0
2654	0	0	0	0	0	0	0	0	0	0	0	0
2655	0	1	0	0	0	0	0	0	0	0	0	1
2656	0	0	0	0	0	0	0	0	1	0	1	0
2657	0	0	0	0	0	0	0	0	0	0	0	0
2658	0	0	0	0	0	0	0	0	0	0	0	0
2659	0	0	0	0	0	1	0	0	1	0	1	1
2660	0	0	0	0	0	0	0	0	0	0	0	0
2661	0	0	0	1	0	0	0	0	0	0	0	1
2662	0	1	0	0	0	0	0	0	0	0	0	1
2663	0	0	0	0	0	0	0	0	0	0	0	0
2664	0	0	0	0	0	0	0	0	0	0	0	0
2665	0	0	0	0	0	0	0	0	0	0	0	0
2666	0	0	0	0	0	0	0	0	0	0	0	0
2667	0	0	0	0	0	0	0	0	0	0	0	0
2668	0	0	0	0	0	0	0	0	0	0	0	0
2669	0	0	0	0	0	0	0	0	0	0	0	0
2670	0	0	0	0	0	0	0	0	0	0	0	0
2671	0	0	0	0	0	0	0	0	0	0	0	0
2672	0	0	0	0	0	0	0	0	0	0	0	0
2673	0	0	0	0	0	0	0	0	0	0	0	0
2674	0	0	0	0	0	0	1	0	0	0	1	0
2675	0	0	0	0	0	0	0	0	0	0	0	0
2676	0	0	0	0	0	0	0	0	0	0	0	0
2677	0	0	0	0	0	0	0	0	0	0	0	0
2678	0	0	0	0	0	0	0	0	0	0	0	0
2679	0	0	0	0	0	0	0	0	0	0	0	0
2680	0	0	0	0	0	0	0	0	0	0	0	0
2681	0	0	0	0	0	0	0	0	0	0	0	0
2682	0	0	0	0	0	0	0	0	0	0	0	0
2683	0	1	0	0	0	0	0	0	0	0	0	1
2684	0	0	0	0	0	0	0	0	0	0	0	0
2685	0	0	0	0	0	0	0	0	0	0	0	0
2686	0	0	0	0	0	0	0	0	0	1	0	1
2687	0	0	0	0	0	0	0	0	0	0	0	0
2688	0	0	0	0	0	0	0	0	0	1	0	1
2689	0	0	0	0	0	0	0	0	0	0	0	0
2690	0	0	0	0	0	5	0	0	0	0	0	5
2691	0	0	0	0	0	0	0	0	0	0	0	0
2692	0	0	0	0	0	0	0	0	0	0	0	0
2693	0	11	0	0	0	0	0	0	0	0	0	11
2694	0	0	0	0	0	1	0	0	0	0	0	1
2695	0	0	0	0	0	0	0	0	0	0	0	0
2696	0	0	0	0	0	0	0	0	0	0	0	0
2697	0	0	0	0	0	0	0	0	0	0	0	0
2698	0	0	0	0	0	0	0	0	0	0	0	0
2699	0	0	0	0	0	0	0	0	0	0	0	0
2700	0	1	0	0	0	0	0	0	0	0	0	1
2701	0	0	0	0	0	0	0	0	0	0	0	0
2702	0	0	0	0	0	1	0	0	0	0	0	1
2703	0	0	0	0	0	0	0	0	0	0	0	0
2704	1	0	0	0	0	0	0	0	0	0	1	0
2705	0	0	0	0	0	0	0	0	0	0	0	0
2706	0	0	0	0	0	0	0	0	0	0	0	0
2707	0	0	0	1	0	0	0	0	0	0	0	1
2708	0	0	0	0	0	0	0	0	0	0	0	0
2709	0	0	0	0	0	0	0	0	0	0	0	0
2710	0	0	0	0	0	0	0	0	0	0	0	0
2711	0	0	0	0	0	0	0	0	0	0	0	0
2712	0	0	0	0	0	0	0	0	0	0	0	0
2713	0	0	0	0	0	0	0	0	0	0	0	0
2714	0	0	0	0	0	0	0	0	0	0	0	0
2715	0	0	0	0	0	0	0	0	0	0	0	0
2716	0	0	0	0	0	0	0	0	0	0	0	0
2717	0	0	0	0	0	0	0	0	0	0	0	0
2718	0	0	0	0	0	0	0	0	0	0	0	0
2719	0	0	0	0	0	0	0	0	0	0	0	0
2720	0	1	0	0	0	35	0	0	0	1	0	37
2721	0	13	0	1	0	0	0	2	0	0	0	16
2722	0	0	0	0	0	0	0	0	0	0	0	0
2723	0	0	0	0	0	0	0	5	0	0	0	5
2724	0	0	0	0	0	0	0	0	0	0	0	0
2725	0	0	0	0	0	0	0	0	0	0	0	0
2726	0	0	0	0	0	0	0	0	0	0	0	0
2727	0	0	0	0	0	0	0	1	0	0	0	1
2728	0	0	0	0	0	0	0	0	0	0	0	0
2729	0	0	0	0	0	0	0	0	0	0	0	0
2730	0	1	0	0	0	0	0	0	0	0	0	1
2731	0	0	0	0	0	0	0	0	0	0	0	0
2732	0	0	0	0	0	0	0	0	0	0	0	0
2733	0	0	0	0	0	0	0	0	0	0	0	0
2734	0	0	0	0	0	0	0	0	0	0	0	0
2735	0	0	0	0	0	0	0	0	0	0	0	0
2736	0	0	0	0	0	0	0	0	0	0	0	0
2737	0	0	0	0	0	0	0	0	0	0	0	0
2738	0	0	0	0	0	0	0	0	1	0	1	0
2739	0	0	0	0	0	0	0	0	0	0	0	0
2740	0	0	0	0	0	0	0	0	0	0	0	0
2741	0	0	0	0	0	0	0	0	0	0	0	0
2742	0	0	0	0	0	1	0	0	0	0	0	1
2743	0	0	0	0	0	0	0	0	0	0	0	0
2744	0	0	0	0	0	0	0	0	0	0	0	0
2745	0	0	0	0	0	0	0	0	0	0	0	0
2746	0	0	0	0	0	0	0	0	0	0	0	0
2747	0	0	0	0	0	0	0	0	0	0	0	0
2748	0	0	0	0	0	0	0	0	0	0	0	0
2749	0	0	0	0	0	0	0	0	0	0	0	0
2750	0	0	0	0	0	0	0	0	0	0	0	0
2751	0	0	0	0	0	0	0	0	0	0	0	0
2752	0	0	0	0	0	0	0	0	0	0	0	0
2753	0	1	0	0	0	0	0	0	0	0	0	1
2754	0	0	0	0	0	0	0	0	0	0	0	0
2755	0	0	0	0	0	0	0	0	0	0	0	0
2756	0	0	0	0	0	0	0	0	0	0	0	0
2757	0	1	0	0	0	0	0	0	0	0	0	1
2758	0	0	0	0	0	0	0	0	0	0	0	0
2759	0	0	0	0	0	0	0	0	0	0	0	0
2760	0	0	0	0	0	0	0	0	0	0	0	0
2761	0	0	0	0	0	1	0	0	0	0	0	1
2762	0	0	0	0	0	0	0	0	0	0	0	0
2763	0	0	0	0	0	0	0	0	0	0	0	0
2764	0	0	0	0	0	0	0	0	0	0	0	0
2765	0	0	0	0	0	0	0	0	0	0	0	0
2766	0	0	0	0	0	0	0	0	0	0	0	0
2767	0	0	0	0	0	0	0	0	0	0	0	0
2768	0	1	0	0	0	0	0	0	0	0	0	1
2769	0	0	0	0	0	0	0	0	0	0	0	0
2770	0	0	0	0	0	0	0	0	0	0	0	0
2771	0	0	0	0	0	0	0	0	0	0	0	0
2772	0	0	0	0	0	0	0	0	0	0	0	0
2773	0	0	0	0	1	0	0	0	0	0	1	0
2774	0	0	0	0	0	0	0	0	0	0	0	0
2775	0	0	0	0	0	0	0	0	0	0	0	0
2776	1	0	0	0	0	0	5	0	0	0	6	0
2777	0	0	0	0	0	0	0	1	0	0	0	1
2778	0	0	0	0	0	0	0	0	0	0	0	0
2779	0	0	0	0	0	0	0	0	0	0	0	0
2780	0	0	0	0	0	0	0	0	0	0	0	0
2781	0	0	0	0	0	0	0	0	0	0	0	0
2782	0	0	0	0	0	0	0	0	0	0	0	0
2783	0	0	0	0	0	0	0	0	0	0	0	0
2784	0	0	0	0	0	0	0	0	0	0	0	0
2785	0	0	0	0	0	0	0	0	0	0	0	0
2786	0	0	0	0	0	0	0	0	0	0	0	0
2787	0	0	0	0	0	0	0	0	0	0	0	0
2788	0	0	0	0	0	0	0	0	0	0	0	0
2789	0	0	0	0	0	0	0	0	0	0	0	0
2790	0	0	0	0	0	0	0	0	0	0	0	0
2791	0	0	0	2	0	0	0	0	0	0	0	2
2792	0	0	0	0	0	0	0	0	0	0	0	0
2793	0	0	0	0	0	0	0	0	0	0	0	0
2794	0	0	0	0	0	0	0	0	0	0	0	0
2795	0	0	0	0	0	0	0	0	0	0	0	0
2796	0	0	0	0	0	0	0	0	0	0	0	0
2797	0	0	0	0	0	0	0	0	0	0	0	0
2798	0	0	0	0	0	0	0	0	0	0	0	0
2799	0	0	0	0	0	0	0	0	0	0	0	0
2800	0	0	0	0	0	0	0	0	0	0	0	0
2801	0	0	0	0	0	0	0	0	0	0	0	0
2802	0	0	0	0	0	0	0	0	0	0	0	0
2803	0	0	0	0	0	0	0	0	0	0	0	0
2804	0	0	0	0	0	0	0	0	0	0	0	0
2805	0	0	0	0	0	0	0	0	0	0	0	0
2806	0	0	0	0	0	0	0	0	0	0	0	0
2807	0	0	0	0	0	0	0	0	0	0	0	0
2808	0	0	0	0	0	0	0	0	0	0	0	0
2809	0	0	0	0	0	0	0	0	0	0	0	0
2810	0	0	0	0	0	0	0	0	0	0	0	0
2811	0	0	0	0	0	0	0	0	0	4	0	4
2812	0	0	0	0	0	0	0	0	0	0	0	0
2813	0	0	0	0	0	0	0	0	0	0	0	0
2814	0	0	0	0	0	0	0	0	0	0	0	0
2815	3	0	2	0	0	0	3	0	0	0	8	0
2816	0	0	0	0	0	1	0	0	0	0	0	1
2817	0	0	0	0	0	0	0	0	0	0	0	0
2818	0	0	0	0	0	0	0	0	0	0	0	0
2819	0	0	0	0	0	0	0	0	0	0	0	0
2820	0	0	0	0	0	0	0	0	0	0	0	0
2821	0	0	0	0	9	0	0	0	0	0	9	0
2822	0	0	0	0	0	0	0	0	0	0	0	0
2823	0	0	0	0	0	0	0	0	0	0	0	0
2824	0	0	0	1	0	0	0	0	0	0	0	1
2825	0	0	0	0	0	0	0	0	0	0	0	0
2826	0	0	0	0	0	0	0	0	0	0	0	0
2827	0	0	0	0	0	0	0	0	0	0	0	0
2828	0	0	0	0	0	0	0	0	0	1	0	1
2829	0	0	0	0	0	0	0	0	0	0	0	0
2830	0	0	0	0	1	0	3	0	0	0	4	0
2831	0	0	0	0	0	0	0	0	0	0	0	0
2832	0	0	0	0	0	0	0	0	0	0	0	0
2833	0	0	0	0	0	0	0	0	0	0	0	0
2834	0	1	0	0	0	0	0	0	0	0	0	1
2835	0	0	0	0	0	0	0	0	0	0	0	0
2836	0	0	0	0	0	0	0	0	0	0	0	0
2837	0	0	0	0	0	0	0	0	0	0	0	0
2838	0	0	0	0	0	0	0	0	0	0	0	0
2839	0	0	0	0	0	0	0	0	0	0	0	0
2840	0	0	0	0	0	0	0	0	0	0	0	0
2841	0	0	0	0	0	0	0	0	0	0	0	0
2842	0	0	0	0	0	0	0	0	0	0	0	0
2843	0	0	0	0	0	0	0	0	0	0	0	0
2844	0	0	0	0	0	0	0	0	0	0	0	0
2845	0	0	0	0	0	0	0	0	0	0	0	0
2846	0	0	0	0	0	0	0	0	0	0	0	0
2847	0	0	0	0	0	0	0	0	0	0	0	0
2848	0	0	0	0	0	0	0	0	0	0	0	0
2849	0	0	0	0	0	1	0	0	0	0	0	1
2850	0	0	0	0	0	0	0	0	0	0	0	0
2851	1	0	3	0	1	0	2	0	1	0	8	0
2852	0	3	0	1	0	1	0	5	0	0	0	10
2853	0	0	0	0	0	1	0	0	0	0	0	1
2854	0	0	0	0	0	0	0	0	0	0	0	0
2855	0	1	0	0	0	0	0	26	0	0	0	27
2856	0	0	0	0	0	0	0	0	0	0	0	0
2857	0	0	0	0	0	0	0	0	0	0	0	0
2858	0	0	0	0	0	0	0	0	0	0	0	0
2859	0	0	0	0	0	0	0	0	0	0	0	0
2860	0	0	0	0	0	0	0	0	0	0	0	0
2861	0	0	0	0	0	0	0	0	0	0	0	0
2862	0	0	0	0	0	0	0	0	0	0	0	0
2863	0	0	0	0	0	0	0	0	0	0	0	0
2864	0	0	0	0	0	0	0	0	0	0	0	0
2865	0	0	0	0	0	0	0	0	0	0	0	0
2866	0	0	0	0	0	0	0	0	0	0	0	0
2867	0	0	0	0	0	0	0	0	0	0	0	0
2868	0	0	0	0	0	0	0	0	0	0	0	0
2869	0	0	0	0	0	0	0	0	0	0	0	0
2870	0	0	0	0	0	0	0	0	0	0	0	0
2871	0	0	0	0	0	0	0	0	0	0	0	0
2872	0	0	0	0	0	0	0	0	0	0	0	0
2873	0	0	0	0	0	0	0	0	0	0	0	0
2874	0	0	0	0	0	0	0	0	0	0	0	0
2875	0	0	0	0	1	0	0	0	0	0	1	0
2876	0	0	0	0	0	0	0	0	0	0	0	0
2877	0	0	0	0	0	0	0	0	0	0	0	0
2878	0	0	0	0	0	0	0	0	0	0	0	0
2879	0	0	0	0	0	0	0	0	0	0	0	0
2880	0	0	0	0	0	0	0	0	0	0	0	0
2881	0	0	0	0	0	0	0	0	0	0	0	0
2882	0	0	0	1	0	0	0	0	0	0	0	1
2883	0	0	0	0	0	0	0	0	0	0	0	0
2884	0	0	0	0	0	0	0	0	0	0	0	0
2885	0	0	0	0	0	0	0	0	0	0	0	0
2886	0	0	0	0	0	0	0	0	0	0	0	0
2887	0	0	0	0	0	0	0	0	0	0	0	0
2888	0	0	0	0	0	0	0	0	0	0	0	0
2889	0	0	0	0	0	0	0	0	0	0	0	0
2890	0	0	0	0	0	0	0	0	0	0	0	0
2891	0	0	0	0	0	0	0	0	0	0	0	0
2892	0	0	0	0	0	1	0	0	0	0	0	1
2893	0	0	0	0	0	1	0	0	0	0	0	1
2894	0	0	0	1	0	0	0	0	0	0	0	1
2895	0	0	0	0	0	0	0	0	0	0	0	0
2896	0	0	0	0	0	0	0	0	0	0	0	0
2897	0	0	0	2	0	7	0	0	0	0	0	9
2898	0	0	0	0	0	0	0	0	0	0	0	0
2899	0	0	0	0	0	0	0	0	0	0	0	0
2900	0	0	0	0	0	0	0	44	0	0	0	44
2901	0	0	0	0	0	0	0	0	0	0	0	0
[truncated: 2,910 more rows]

## Sheet: C
Legends to Supplemental Table 4.
A. CpG mutations in 5' UTRs of PacBio-sequenced FL-L1Hs elements (Figure 4C).
Pos	L1 position of CpG gain or loss (gain: positive integer; loss: negative integer)
Ta0	Frequency of CpG gain or loss in Ta0 subfamily
Ta1nd	Frequency of CpG gain or loss in Ta1nd subfamily
Ta1d-CAT	Frequency of CpG gain or loss in Ta1d-CAT subfamily
Ta1d-CCA	Frequency of CpG gain or loss in Ta1d-CCA subfamily
Ta1d-TCA	Frequency of CpG gain or loss in Ta1d-TCA subfamily
B. Synonymous and nonsynonymous mutations ORF1 and ORF2 regions of PacBio-sequenced FL-L1Hs elements (Figure 4D).
Pos	L1 position of ORF mutation
Ta0 - Syn	Frequency of synonymous mutation in Ta0 subfamily
Ta0 - Nonsyn	Frequency of nonsynonymous mutation in Ta0 subfamily
Ta1nd - Syn	Frequency of synonymous mutation in Ta1nd subfamily
Ta1nd - Nonsyn	Frequency of nonsynonymous mutation in Ta1nd subfamily
Ta1d-CAT - Syn	Frequency of synonymous mutation in Ta1d-CAT subfamily
Ta1d-CAT - Nonsyn	Frequency of nonsynonymous mutation in Ta1d-CAT subfamily
Ta1d-CCA - Syn	Frequency of synonymous mutation in Ta1d-CCA subfamily
Ta1d-CCA - Nonsyn	Frequency of nonsynonymous mutation in Ta1d-CCA subfamily
Ta1d-TCA - Syn	Frequency of synonymous mutation in Ta1d-TCA subfamily
Ta1d-TCA - Nonsyn	Frequency of nonsynonymous mutation in Ta1d-TCA subfamily
Total Syn	Total number of synonymous mutation
Total Nonsyn	Total number of nonsynonymous mutation
