# Supplementary material for: Mutagenesis of human genomes by endogenous mobile elements on a population scale
Source: HighWire-hosted journal article supplement (doi:10.1101/gr.275323.121), 2021-11-12
Supplement: Supplemental_Table_S5.xlsx [file Supplemental_Table_S5.xlsx]

## Sheet: A
Supplemental_Table_S5.xlsx. MEI counts.
A. 1KGP 2504 distribution of MEI counts (Figure 5A).
Sample	Population	Superpopulation	LINE1	Alu	SVA	HERVK	FL-L1s	FL fraction
HG02497	ACB	AFR	243	2052	101	20	47	0.193416
HG01889	ACB	AFR	238	2057	103	15	52	0.218487
HG02537	ACB	AFR	242	2023	122	18	37	0.152893
HG02337	ACB	AFR	242	2032	113	14	39	0.161157
HG01894	ACB	AFR	251	2001	122	17	49	0.195219
HG01956	ACB	AFR	245	2010	111	17	43	0.17551
HG02111	ACB	AFR	253	2004	100	17	52	0.205534
HG01882	ACB	AFR	244	1995	119	15	51	0.209016
HG02095	ACB	AFR	239	2013	101	15	38	0.158996
HG02308	ACB	AFR	259	1986	103	15	50	0.19305
HG02108	ACB	AFR	254	1973	115	19	56	0.220472
HG02051	ACB	AFR	265	1971	107	14	55	0.207547
HG02479	ACB	AFR	260	1954	124	19	44	0.169231
HG01985	ACB	AFR	264	1967	110	14	49	0.185606
HG01883	ACB	AFR	250	1970	108	22	39	0.156
HG02309	ACB	AFR	250	1974	110	16	46	0.184
HG02449	ACB	AFR	263	1967	103	17	57	0.21673
HG02508	ACB	AFR	247	1988	98	17	48	0.194332
HG02511	ACB	AFR	255	1963	115	15	46	0.180392
HG02052	ACB	AFR	242	1966	116	23	43	0.177686
HG02107	ACB	AFR	232	1979	115	20	43	0.185345
HG02054	ACB	AFR	244	1982	107	12	54	0.221311
HG01914	ACB	AFR	234	1990	98	18	37	0.15812
HG02442	ACB	AFR	247	1979	97	17	50	0.202429
HG02549	ACB	AFR	265	1952	94	16	46	0.173585
HG02323	ACB	AFR	233	1961	115	17	53	0.227468
HG01885	ACB	AFR	248	1963	96	18	54	0.217742
HG02318	ACB	AFR	269	1942	98	16	61	0.226766
HG02558	ACB	AFR	251	1936	114	20	52	0.207171
HG01890	ACB	AFR	226	1966	104	19	44	0.19469
HG02477	ACB	AFR	250	1950	102	13	46	0.184
HG01958	ACB	AFR	239	1941	120	14	48	0.200837
HG02476	ACB	AFR	260	1920	115	16	50	0.192308
HG02014	ACB	AFR	255	1917	117	21	49	0.192157
HG02013	ACB	AFR	250	1933	104	20	59	0.236
HG02053	ACB	AFR	239	1946	103	18	48	0.200837
HG02455	ACB	AFR	269	1913	103	19	54	0.200743
HG02496	ACB	AFR	230	1953	107	13	43	0.186957
HG02536	ACB	AFR	250	1926	106	19	50	0.2
HG01990	ACB	AFR	249	1928	101	21	53	0.212851
HG02012	ACB	AFR	254	1925	107	13	53	0.208661
HG02010	ACB	AFR	254	1929	99	16	47	0.185039
HG02330	ACB	AFR	248	1929	104	17	48	0.193548
HG02555	ACB	AFR	251	1920	111	14	50	0.199203
HG01912	ACB	AFR	258	1917	100	18	56	0.217054
HG02429	ACB	AFR	257	1900	118	18	60	0.233463
HG02307	ACB	AFR	248	1922	105	15	50	0.201613
HG02255	ACB	AFR	243	1919	110	15	50	0.205761
HG01986	ACB	AFR	248	1910	112	16	54	0.217742
HG01886	ACB	AFR	246	1919	107	13	56	0.227642
HG02332	ACB	AFR	240	1934	97	14	52	0.216667
HG02322	ACB	AFR	250	1924	98	12	54	0.216
HG02450	ACB	AFR	239	1931	97	17	44	0.1841
HG02445	ACB	AFR	256	1911	100	14	58	0.226563
HG02419	ACB	AFR	248	1905	105	17	51	0.205645
HG02143	ACB	AFR	244	1904	111	15	47	0.192623
HG02256	ACB	AFR	238	1911	108	17	49	0.205882
HG01896	ACB	AFR	232	1933	94	13	49	0.211207
HG01915	ACB	AFR	255	1898	103	16	51	0.2
HG02439	ACB	AFR	230	1912	110	19	44	0.191304
HG02470	ACB	AFR	238	1916	101	15	37	0.155462
HG02314	ACB	AFR	227	1930	98	14	45	0.198238
HG02283	ACB	AFR	243	1914	92	19	46	0.1893
HG02427	ACB	AFR	235	1927	90	15	47	0.2
HG02471	ACB	AFR	244	1916	93	14	48	0.196721
HG02484	ACB	AFR	256	1890	100	20	48	0.1875
HG02554	ACB	AFR	230	1915	103	18	52	0.226087
HG02580	ACB	AFR	240	1913	96	15	44	0.183333
HG02334	ACB	AFR	236	1911	96	19	51	0.216102
HG01880	ACB	AFR	260	1895	94	12	52	0.2
HG02284	ACB	AFR	235	1906	107	13	48	0.204255
HG02317	ACB	AFR	248	1895	100	18	47	0.189516
HG02144	ACB	AFR	247	1893	105	13	53	0.214575
HG02505	ACB	AFR	234	1895	110	18	46	0.196581
HG02545	ACB	AFR	237	1905	98	17	58	0.244726
HG01879	ACB	AFR	246	1897	95	18	45	0.182927
HG02502	ACB	AFR	238	1886	111	17	55	0.231092
HG02485	ACB	AFR	240	1889	101	18	56	0.233333
HG02481	ACB	AFR	244	1877	110	16	46	0.188525
HG01989	ACB	AFR	237	1881	111	14	44	0.185654
HG02281	ACB	AFR	229	1895	104	14	48	0.209607
HG02577	ACB	AFR	258	1859	104	18	43	0.166667
HG02343	ACB	AFR	245	1879	96	14	50	0.204082
HG02282	ACB	AFR	259	1860	99	15	51	0.196911
HG02433	ACB	AFR	255	1868	91	16	47	0.184314
HG02541	ACB	AFR	226	1892	96	15	47	0.207965
HG02325	ACB	AFR	240	1866	104	18	40	0.166667
HG02546	ACB	AFR	230	1876	103	17	36	0.156522
HG02009	ACB	AFR	214	1889	103	17	44	0.205607
HG02315	ACB	AFR	231	1877	95	18	42	0.181818
HG02489	ACB	AFR	238	1854	110	18	54	0.226891
HG02557	ACB	AFR	238	1858	106	17	37	0.155462
HG02339	ACB	AFR	247	1853	99	17	53	0.214575
HG02420	ACB	AFR	232	1855	92	18	55	0.237069
HG02501	ACB	AFR	249	1823	106	15	43	0.172691
HG01988	ACB	AFR	246	1792	86	21	61	0.247967
NA19436	LWK	AFR	259	2081	97	19	52	0.200772
NA19321	LWK	AFR	268	2043	114	16	52	0.19403
NA19443	LWK	AFR	257	2031	112	16	52	0.202335
NA19320	LWK	AFR	249	2011	115	21	53	0.212851
NA19475	LWK	AFR	251	2009	114	19	48	0.191235
NA19474	LWK	AFR	263	1994	119	14	52	0.197719
NA19036	LWK	AFR	244	2013	106	13	44	0.180328
NA19315	LWK	AFR	260	1976	103	19	54	0.207692
NA19462	LWK	AFR	262	1975	104	16	58	0.221374
NA19437	LWK	AFR	266	1965	106	17	48	0.180451
NA19449	LWK	AFR	245	1981	108	18	38	0.155102
NA19338	LWK	AFR	223	1990	121	17	44	0.197309
NA19457	LWK	AFR	261	1956	114	16	56	0.214559
NA19031	LWK	AFR	255	1960	109	21	54	0.211765
NA19473	LWK	AFR	248	1977	103	17	50	0.201613
NA19393	LWK	AFR	250	1972	104	16	55	0.22
NA19463	LWK	AFR	255	1961	110	14	51	0.2
NA19440	LWK	AFR	247	1969	105	18	45	0.182186
NA19383	LWK	AFR	233	1985	99	16	49	0.2103
NA19314	LWK	AFR	258	1959	98	17	54	0.209302
NA19391	LWK	AFR	243	1973	97	16	56	0.230453
NA19468	LWK	AFR	240	1954	113	19	48	0.2
NA19399	LWK	AFR	244	1947	117	17	42	0.172131
NA19332	LWK	AFR	235	1978	91	19	48	0.204255
NA19312	LWK	AFR	264	1943	96	19	57	0.215909
NA19461	LWK	AFR	231	1965	107	19	58	0.251082
NA19035	LWK	AFR	231	1966	105	19	39	0.168831
NA19317	LWK	AFR	254	1949	97	21	50	0.19685
NA19435	LWK	AFR	250	1946	104	20	52	0.208
NA19467	LWK	AFR	243	1949	111	17	48	0.197531
NA19355	LWK	AFR	232	1966	103	18	51	0.219828
NA19319	LWK	AFR	257	1941	100	19	52	0.202335
NA19472	LWK	AFR	243	1955	104	15	40	0.164609
NA19308	LWK	AFR	247	1954	99	16	56	0.226721
NA19327	LWK	AFR	239	1942	113	20	42	0.175732
NA19360	LWK	AFR	254	1946	98	16	44	0.173228
NA19378	LWK	AFR	250	1942	104	17	41	0.164
NA19429	LWK	AFR	245	1935	116	16	51	0.208163
NA19394	LWK	AFR	254	1944	95	17	45	0.177165
NA19027	LWK	AFR	243	1952	96	15	51	0.209877
NA19401	LWK	AFR	247	1944	94	21	53	0.214575
NA19026	LWK	AFR	234	1948	107	16	55	0.235043
NA19430	LWK	AFR	233	1940	119	12	42	0.180258
NA19024	LWK	AFR	259	1927	96	20	43	0.166023
NA19028	LWK	AFR	252	1938	96	16	41	0.162698
NA19318	LWK	AFR	219	1978	92	11	43	0.196347
NA19434	LWK	AFR	244	1925	112	18	51	0.209016
NA19374	LWK	AFR	270	1900	108	20	47	0.174074
NA19350	LWK	AFR	233	1946	107	11	47	0.201717
NA19331	LWK	AFR	245	1932	103	15	53	0.216327
NA19438	LWK	AFR	243	1917	117	18	54	0.222222
NA19446	LWK	AFR	250	1923	107	15	49	0.196
NA19471	LWK	AFR	238	1936	106	14	53	0.222689
NA19347	LWK	AFR	263	1915	100	15	52	0.197719
NA19042	LWK	AFR	235	1945	96	16	44	0.187234
NA19404	LWK	AFR	261	1908	105	18	56	0.214559
NA19431	LWK	AFR	257	1901	116	16	57	0.22179
NA19043	LWK	AFR	231	1954	89	15	45	0.194805
NA19328	LWK	AFR	242	1929	105	13	46	0.190083
NA19334	LWK	AFR	258	1905	104	21	59	0.228682
NA19451	LWK	AFR	254	1921	98	15	52	0.204724
NA19452	LWK	AFR	234	1928	107	14	47	0.200855
NA19456	LWK	AFR	252	1918	98	15	53	0.210317
NA19439	LWK	AFR	259	1903	105	15	48	0.185328
NA19445	LWK	AFR	246	1915	105	16	53	0.215447
NA19455	LWK	AFR	221	1949	99	13	43	0.19457
NA19324	LWK	AFR	248	1920	94	19	47	0.189516
NA19020	LWK	AFR	255	1907	102	16	52	0.203922
NA19023	LWK	AFR	235	1928	98	16	35	0.148936
NA19030	LWK	AFR	259	1897	101	20	41	0.158301
NA19309	LWK	AFR	254	1892	111	20	59	0.232283
NA19377	LWK	AFR	241	1910	108	18	46	0.190871
NA19384	LWK	AFR	253	1904	101	19	42	0.166008
NA19310	LWK	AFR	229	1917	112	16	44	0.19214
NA19323	LWK	AFR	240	1907	107	20	46	0.191667
NA19379	LWK	AFR	241	1915	101	17	52	0.215768
NA19037	LWK	AFR	242	1897	113	19	49	0.202479
NA19316	LWK	AFR	253	1902	93	23	43	0.16996
NA19385	LWK	AFR	228	1921	104	17	47	0.20614
NA19448	LWK	AFR	236	1896	120	18	40	0.169492
NA19017	LWK	AFR	244	1913	94	17	46	0.188525
NA19376	LWK	AFR	237	1907	107	16	50	0.21097
NA19466	LWK	AFR	230	1920	100	17	47	0.204348
NA19403	LWK	AFR	227	1903	115	19	50	0.220264
NA19390	LWK	AFR	230	1903	111	18	47	0.204348
NA19397	LWK	AFR	243	1899	101	17	50	0.205761
NA19351	LWK	AFR	237	1892	110	20	48	0.202532
NA19380	LWK	AFR	257	1877	104	21	47	0.182879
NA19454	LWK	AFR	243	1877	107	20	44	0.18107
NA19428	LWK	AFR	215	1912	102	17	38	0.176744
NA19041	LWK	AFR	234	1896	97	16	43	0.183761
NA19307	LWK	AFR	247	1871	106	16	46	0.186235
NA19025	LWK	AFR	216	1899	102	14	46	0.212963
NA19038	LWK	AFR	242	1862	110	15	55	0.227273
NA19372	LWK	AFR	239	1880	95	15	40	0.167364
NA19395	LWK	AFR	238	1865	92	18	49	0.205882
NA19375	LWK	AFR	231	1862	100	16	48	0.207792
NA19346	LWK	AFR	232	1855	90	21	46	0.198276
NA19019	LWK	AFR	223	1856	96	17	50	0.224215
HG03241	GWD	AFR	262	1998	110	22	37	0.141221
HG02851	GWD	AFR	250	2017	106	13	54	0.216
HG02817	GWD	AFR	248	2007	113	17	59	0.237903
HG02807	GWD	AFR	263	1997	108	15	50	0.190114
HG02624	GWD	AFR	264	1994	108	14	57	0.215909
HG02634	GWD	AFR	247	1984	120	16	42	0.17004
HG02589	GWD	AFR	259	1963	119	20	50	0.19305
HG02465	GWD	AFR	264	1957	115	19	50	0.189394
HG02715	GWD	AFR	240	1990	110	15	54	0.225
HG02855	GWD	AFR	257	1980	100	17	46	0.178988
HG02568	GWD	AFR	260	1974	103	16	44	0.169231
HG03258	GWD	AFR	269	1960	103	20	49	0.182156
HG02757	GWD	AFR	253	1991	92	15	49	0.193676
HG02814	GWD	AFR	241	1979	112	18	47	0.195021
HG02628	GWD	AFR	255	1981	95	18	51	0.2
HG02716	GWD	AFR	259	1961	116	13	43	0.166023
HG02583	GWD	AFR	247	1968	117	16	48	0.194332
HG03049	GWD	AFR	229	1994	107	15	45	0.196507
HG02771	GWD	AFR	260	1957	112	14	59	0.226923
HG02820	GWD	AFR	240	1982	102	16	48	0.2
HG02819	GWD	AFR	255	1956	108	20	45	0.176471
HG02620	GWD	AFR	247	1962	111	18	47	0.190283
HG02642	GWD	AFR	242	1957	113	19	46	0.190083
HG03046	GWD	AFR	258	1948	107	17	48	0.186047
HG02768	GWD	AFR	231	1966	114	16	56	0.242424
HG02983	GWD	AFR	253	1967	96	11	56	0.221344
HG02461	GWD	AFR	230	1961	116	19	46	0.2
HG02562	GWD	AFR	233	1966	112	15	42	0.180258
HG02870	GWD	AFR	258	1944	108	16	46	0.178295
HG03045	GWD	AFR	260	1950	103	13	50	0.192308
HG02588	GWD	AFR	243	1960	106	16	47	0.193416
HG02854	GWD	AFR	254	1937	116	18	58	0.228346
HG02574	GWD	AFR	268	1930	109	16	55	0.205224
HG02769	GWD	AFR	252	1943	115	12	42	0.166667
HG02798	GWD	AFR	258	1939	107	15	51	0.197674
HG02882	GWD	AFR	262	1950	90	17	53	0.20229
HG02561	GWD	AFR	237	1949	114	17	42	0.177215
HG02623	GWD	AFR	237	1948	114	18	53	0.223629
HG02772	GWD	AFR	271	1922	104	18	54	0.199262
HG02646	GWD	AFR	244	1949	101	19	42	0.172131
HG02808	GWD	AFR	255	1929	111	18	47	0.184314
HG02635	GWD	AFR	256	1937	103	16	55	0.214844
HG02676	GWD	AFR	241	1946	104	18	43	0.178423
HG03247	GWD	AFR	254	1932	104	16	51	0.200787
HG02891	GWD	AFR	239	1929	119	16	40	0.167364
HG03039	GWD	AFR	254	1922	110	16	47	0.185039
HG02586	GWD	AFR	253	1926	106	16	42	0.166008
HG02804	GWD	AFR	248	1914	122	17	42	0.169355
HG02839	GWD	AFR	225	1965	92	19	46	0.204444
HG03025	GWD	AFR	252	1938	94	17	54	0.214286
HG02462	GWD	AFR	250	1921	109	18	54	0.216
HG03240	GWD	AFR	260	1914	108	16	52	0.2
HG02722	GWD	AFR	239	1946	95	17	47	0.196653
HG02885	GWD	AFR	226	1957	99	15	50	0.221239
HG02610	GWD	AFR	246	1924	111	15	52	0.211382
HG03538	GWD	AFR	244	1928	108	15	41	0.168033
HG02621	GWD	AFR	244	1934	101	15	40	0.163934
HG02721	GWD	AFR	220	1962	97	13	45	0.204545
HG02756	GWD	AFR	252	1913	107	20	45	0.178571
HG02570	GWD	AFR	264	1898	113	16	43	0.162879
HG02571	GWD	AFR	242	1924	113	12	51	0.210744
HG02836	GWD	AFR	250	1915	111	15	53	0.212
HG03028	GWD	AFR	241	1937	101	12	38	0.157676
HG02813	GWD	AFR	243	1919	106	21	49	0.201646
HG02679	GWD	AFR	237	1920	108	19	47	0.198312
HG02643	GWD	AFR	252	1902	111	18	47	0.186508
HG02811	GWD	AFR	240	1914	114	14	37	0.154167
HG02837	GWD	AFR	238	1917	116	11	50	0.210084
HG02799	GWD	AFR	238	1921	106	16	45	0.189076
HG02760	GWD	AFR	231	1925	110	14	43	0.186147
HG02585	GWD	AFR	247	1917	95	20	56	0.226721
HG02890	GWD	AFR	249	1921	92	16	44	0.176707
HG02667	GWD	AFR	236	1924	98	19	35	0.148305
HG02611	GWD	AFR	245	1899	115	17	47	0.191837
HG02573	GWD	AFR	258	1901	101	14	44	0.170543
HG02816	GWD	AFR	226	1931	103	14	41	0.181416
HG02595	GWD	AFR	258	1903	93	18	49	0.189922
HG03246	GWD	AFR	241	1918	99	14	54	0.224066
HG03539	GWD	AFR	264	1882	105	20	47	0.17803
HG02594	GWD	AFR	234	1906	111	18	51	0.217949
HG02895	GWD	AFR	245	1900	108	16	48	0.195918
HG03027	GWD	AFR	242	1908	105	14	55	0.227273
HG02645	GWD	AFR	235	1922	94	17	49	0.208511
HG03259	GWD	AFR	255	1901	93	18	44	0.172549
HG02881	GWD	AFR	237	1918	85	18	41	0.172996
HG02887	GWD	AFR	241	1902	98	17	45	0.186722
HG02614	GWD	AFR	250	1886	105	16	41	0.164
HG03040	GWD	AFR	218	1919	102	15	45	0.206422
HG02582	GWD	AFR	244	1892	103	14	47	0.192623
HG02852	GWD	AFR	240	1890	101	21	49	0.204167
HG02805	GWD	AFR	229	1899	104	16	46	0.200873
HG02878	GWD	AFR	231	1898	98	19	36	0.155844
HG02860	GWD	AFR	222	1907	99	17	46	0.207207
HG02982	GWD	AFR	242	1903	83	17	47	0.194215
HG02759	GWD	AFR	229	1899	96	20	42	0.183406
HG02629	GWD	AFR	251	1874	101	17	39	0.155378
HG02884	GWD	AFR	237	1898	89	19	53	0.223629
HG02703	GWD	AFR	240	1885	102	15	47	0.195833
HG02861	GWD	AFR	232	1891	99	15	44	0.189655
HG02879	GWD	AFR	219	1902	97	18	42	0.191781
HG02666	GWD	AFR	225	1900	89	20	39	0.173333
HG02888	GWD	AFR	232	1886	99	17	46	0.198276
HG02675	GWD	AFR	235	1873	110	13	48	0.204255
HG02702	GWD	AFR	256	1851	105	17	56	0.21875
HG02763	GWD	AFR	231	1879	103	14	43	0.186147
HG02896	GWD	AFR	244	1859	105	14	39	0.159836
HG02613	GWD	AFR	233	1878	93	16	46	0.197425
HG03048	GWD	AFR	236	1865	103	13	51	0.216102
HG02810	GWD	AFR	230	1861	110	15	54	0.234783
HG02840	GWD	AFR	208	1878	97	20	40	0.192308
HG03024	GWD	AFR	230	1854	101	17	43	0.186957
HG02464	GWD	AFR	235	1859	96	10	44	0.187234
HG02678	GWD	AFR	227	1834	104	17	51	0.22467
NA18881	YRI	AFR	257	2060	119	17	51	0.198444
NA18508	YRI	AFR	257	2056	104	17	47	0.182879
NA19099	YRI	AFR	273	2006	115	16	51	0.186813
NA18489	YRI	AFR	256	2025	105	20	49	0.191406
NA18865	YRI	AFR	250	2028	96	19	53	0.212
NA18876	YRI	AFR	247	2020	111	13	45	0.182186
NA19185	YRI	AFR	254	2016	100	21	53	0.208661
NA18519	YRI	AFR	235	2046	89	15	48	0.204255
NA18520	YRI	AFR	263	2008	96	15	59	0.224335
NA19209	YRI	AFR	253	2018	95	14	47	0.185771
NA18907	YRI	AFR	277	1984	98	18	58	0.209386
NA18879	YRI	AFR	257	1997	108	14	53	0.206226
NA18858	YRI	AFR	236	2017	105	15	42	0.177966
NA19214	YRI	AFR	273	1973	107	20	53	0.194139
NA19129	YRI	AFR	239	1992	112	16	52	0.217573
NA19149	YRI	AFR	258	1982	103	15	44	0.170543
NA19113	YRI	AFR	247	1993	100	15	55	0.222672
NA19238	YRI	AFR	260	1959	120	12	50	0.192308
NA18505	YRI	AFR	259	1958	115	17	55	0.212355
NA18910	YRI	AFR	236	1984	110	18	37	0.15678
NA18856	YRI	AFR	229	1994	110	12	43	0.187773
NA19095	YRI	AFR	265	1964	101	15	40	0.150943
NA18871	YRI	AFR	260	1956	116	12	45	0.173077
NA18908	YRI	AFR	261	1959	108	15	47	0.180077
NA19118	YRI	AFR	229	1999	97	18	44	0.19214
NA18878	YRI	AFR	248	1960	116	17	55	0.221774
NA18917	YRI	AFR	250	1968	102	18	46	0.184
NA19235	YRI	AFR	235	1982	106	15	43	0.182979
NA18873	YRI	AFR	229	1993	102	13	32	0.139738
NA18923	YRI	AFR	255	1965	102	15	46	0.180392
NA18870	YRI	AFR	247	1966	103	19	49	0.198381
NA18909	YRI	AFR	246	1963	110	15	45	0.182927
NA19200	YRI	AFR	248	1960	108	18	48	0.193548
NA18511	YRI	AFR	253	1964	99	14	57	0.225296
NA18523	YRI	AFR	264	1944	104	18	55	0.208333
NA18877	YRI	AFR	247	1948	115	20	45	0.182186
NA19098	YRI	AFR	245	1962	105	18	42	0.171429
NA19137	YRI	AFR	241	1965	107	17	55	0.228216
NA18502	YRI	AFR	252	1951	106	20	51	0.202381
NA19257	YRI	AFR	268	1934	107	19	55	0.205224
NA19189	YRI	AFR	239	1962	108	14	48	0.200837
NA19247	YRI	AFR	240	1955	113	13	40	0.166667
NA18498	YRI	AFR	230	1972	103	14	47	0.204348
NA19114	YRI	AFR	238	1955	110	16	42	0.176471
NA19198	YRI	AFR	256	1953	97	13	45	0.175781
NA19190	YRI	AFR	249	1949	101	16	49	0.196787
NA18501	YRI	AFR	236	1964	99	14	47	0.199153
NA19213	YRI	AFR	249	1945	103	16	47	0.188755
NA18853	YRI	AFR	235	1943	113	19	52	0.221277
NA18915	YRI	AFR	237	1954	104	15	44	0.185654
NA19146	YRI	AFR	240	1940	113	15	48	0.2
NA19222	YRI	AFR	259	1938	92	18	49	0.189189
NA19153	YRI	AFR	244	1938	103	21	45	0.184426
NA18510	YRI	AFR	243	1946	103	13	40	0.164609
NA19121	YRI	AFR	252	1941	95	13	51	0.202381
NA19117	YRI	AFR	260	1926	100	14	44	0.169231
NA19160	YRI	AFR	230	1947	106	17	40	0.173913
NA19147	YRI	AFR	252	1926	106	15	47	0.186508
NA19206	YRI	AFR	242	1939	102	15	52	0.214876
NA19102	YRI	AFR	238	1931	106	21	44	0.184874
NA18868	YRI	AFR	228	1952	100	15	53	0.232456
NA19131	YRI	AFR	244	1936	94	21	59	0.241803
NA19143	YRI	AFR	253	1920	103	19	52	0.205534
NA18864	YRI	AFR	235	1931	113	15	40	0.170213
NA18933	YRI	AFR	243	1951	85	13	49	0.201646
NA18934	YRI	AFR	240	1927	107	18	56	0.233333
NA19107	YRI	AFR	251	1910	112	18	47	0.187251
NA18912	YRI	AFR	245	1922	103	17	43	0.17551
NA19201	YRI	AFR	237	1921	105	19	52	0.219409
NA19152	YRI	AFR	234	1934	97	16	48	0.205128
NA19210	YRI	AFR	244	1917	103	17	44	0.180328
NA19108	YRI	AFR	239	1932	90	19	49	0.205021
NA19144	YRI	AFR	248	1901	112	18	45	0.181452
NA18874	YRI	AFR	220	1930	106	21	41	0.186364
NA19236	YRI	AFR	233	1927	104	13	52	0.223176
NA18486	YRI	AFR	253	1915	93	15	51	0.201581
NA19092	YRI	AFR	230	1928	101	17	41	0.178261
NA18916	YRI	AFR	242	1910	104	19	52	0.214876
NA18924	YRI	AFR	253	1906	99	17	51	0.201581
NA19116	YRI	AFR	263	1888	105	19	56	0.212928
NA19197	YRI	AFR	231	1921	109	13	49	0.212121
NA19204	YRI	AFR	240	1919	98	17	44	0.183333
NA19225	YRI	AFR	237	1930	93	14	52	0.219409
NA19171	YRI	AFR	255	1904	100	14	54	0.211765
NA19256	YRI	AFR	228	1919	101	23	45	0.197368
NA19239	YRI	AFR	251	1905	97	16	46	0.183267
NA19184	YRI	AFR	239	1907	107	15	43	0.179916
NA18499	YRI	AFR	243	1922	88	14	50	0.205761
NA19175	YRI	AFR	242	1911	97	17	47	0.194215
NA19130	YRI	AFR	251	1887	110	16	46	0.183267
NA19223	YRI	AFR	252	1884	111	15	44	0.174603
NA18867	YRI	AFR	229	1904	109	19	44	0.19214
NA19093	YRI	AFR	270	1872	101	18	51	0.188889
NA19159	YRI	AFR	254	1883	103	19	51	0.200787
NA18488	YRI	AFR	240	1899	101	17	48	0.2
NA18516	YRI	AFR	263	1878	98	17	46	0.174905
NA19248	YRI	AFR	244	1888	103	20	57	0.233607
NA18517	YRI	AFR	239	1899	94	22	49	0.205021
NA18504	YRI	AFR	254	1884	97	14	53	0.208661
NA19119	YRI	AFR	236	1891	98	22	41	0.173729
NA19141	YRI	AFR	251	1876	102	14	46	0.183267
NA19172	YRI	AFR	253	1880	93	16	53	0.209486
NA18522	YRI	AFR	215	1917	89	15	40	0.186047
NA18507	YRI	AFR	250	1866	100	12	47	0.188
NA19207	YRI	AFR	229	1873	104	18	47	0.20524
NA19138	YRI	AFR	244	1870	89	15	49	0.20082
NA18861	YRI	AFR	231	1857	103	22	43	0.186147
NA19096	YRI	AFR	225	1847	108	22	45	0.2
HG03548	MSL	AFR	246	2070	111	15	46	0.186992
HG03079	MSL	AFR	240	2063	109	15	54	0.225
HG03066	MSL	AFR	259	2030	121	16	44	0.169884
HG03479	MSL	AFR	251	2031	115	22	53	0.211155
HG03385	MSL	AFR	252	2038	107	18	59	0.234127
HG03069	MSL	AFR	239	2060	95	19	43	0.179916
HG03388	MSL	AFR	243	2039	116	14	48	0.197531
HG03470	MSL	AFR	265	2014	110	19	55	0.207547
HG03572	MSL	AFR	265	2021	102	18	57	0.215094
HG03054	MSL	AFR	249	2027	112	16	43	0.172691
HG03458	MSL	AFR	241	2043	99	15	51	0.211618
HG03583	MSL	AFR	251	2015	110	16	43	0.171315
HG03378	MSL	AFR	263	2014	99	15	51	0.193916
HG03455	MSL	AFR	262	1994	108	24	42	0.160305
HG03449	MSL	AFR	282	1975	113	16	50	0.177305
HG03401	MSL	AFR	230	2033	99	21	48	0.208696
HG03224	MSL	AFR	251	2024	94	13	45	0.179283
HG03072	MSL	AFR	269	1987	111	14	57	0.211896
HG03563	MSL	AFR	245	2015	101	20	46	0.187755
HG03225	MSL	AFR	233	2022	109	13	35	0.150215
HG03419	MSL	AFR	247	2007	103	18	52	0.210526
HG03085	MSL	AFR	275	1967	112	18	57	0.207273
HG03052	MSL	AFR	250	1984	117	18	45	0.18
HG03091	MSL	AFR	259	1986	108	14	43	0.166023
HG03380	MSL	AFR	247	1983	120	16	43	0.174089
HG03095	MSL	AFR	246	2004	97	17	48	0.195122
HG03567	MSL	AFR	256	1996	97	15	50	0.195313
HG03088	MSL	AFR	265	1973	106	19	42	0.158491
HG03097	MSL	AFR	247	1994	109	13	50	0.202429
HG03476	MSL	AFR	254	1994	96	18	56	0.220472
HG03547	MSL	AFR	253	1984	105	19	47	0.185771
HG03433	MSL	AFR	245	1999	98	17	43	0.17551
HG03457	MSL	AFR	242	2003	99	14	46	0.190083
HG03209	MSL	AFR	251	1974	116	16	51	0.203187
HG03436	MSL	AFR	244	1985	108	20	45	0.184426
HG03452	MSL	AFR	273	1955	116	13	50	0.18315
HG03055	MSL	AFR	267	1956	116	17	50	0.187266
HG03485	MSL	AFR	240	1989	110	17	43	0.179167
HG03081	MSL	AFR	253	1978	110	14	48	0.189723
HG03060	MSL	AFR	246	1980	108	19	51	0.207317
HG03086	MSL	AFR	246	1975	116	16	48	0.195122
HG03096	MSL	AFR	256	1980	100	16	51	0.199219
HG03445	MSL	AFR	255	1975	98	18	50	0.196078
HG03077	MSL	AFR	257	1958	114	15	49	0.190661
HG03460	MSL	AFR	243	1975	108	15	41	0.168724
HG03084	MSL	AFR	239	1968	110	18	59	0.246862
HG03073	MSL	AFR	239	1972	102	21	36	0.150628
HG03472	MSL	AFR	249	1958	115	12	48	0.192771
HG03058	MSL	AFR	242	1974	97	18	49	0.202479
HG03451	MSL	AFR	242	1967	102	20	49	0.202479
HG03082	MSL	AFR	258	1965	92	15	51	0.197674
HG03478	MSL	AFR	240	1971	101	18	47	0.195833
HG03437	MSL	AFR	246	1955	108	20	38	0.154472
HG03212	MSL	AFR	255	1941	114	18	51	0.2
HG03391	MSL	AFR	241	1963	108	16	51	0.211618
HG03556	MSL	AFR	251	1953	106	18	47	0.187251
HG03410	MSL	AFR	246	1958	110	13	51	0.207317
HG03575	MSL	AFR	250	1955	107	15	45	0.18
HG03382	MSL	AFR	232	1962	111	19	43	0.185345
HG03428	MSL	AFR	240	1956	116	12	40	0.166667
HG03578	MSL	AFR	246	1961	99	17	47	0.191057
HG03484	MSL	AFR	226	1977	99	19	43	0.190265
HG03565	MSL	AFR	246	1937	113	22	63	0.256098
HG03064	MSL	AFR	247	1938	111	21	57	0.230769
HG03442	MSL	AFR	243	1948	114	12	46	0.1893
HG03432	MSL	AFR	259	1915	114	17	56	0.216216
HG03394	MSL	AFR	245	1933	109	14	54	0.220408
HG03461	MSL	AFR	251	1922	106	17	48	0.191235
HG03469	MSL	AFR	234	1937	106	18	46	0.196581
HG03558	MSL	AFR	250	1927	100	17	53	0.212
HG03057	MSL	AFR	246	1914	113	20	49	0.199187
HG03571	MSL	AFR	237	1925	112	14	50	0.21097
HG03446	MSL	AFR	236	1926	108	16	49	0.207627
HG03063	MSL	AFR	244	1886	121	16	47	0.192623
HG03464	MSL	AFR	241	1901	103	17	44	0.182573
HG03376	MSL	AFR	237	1901	107	14	44	0.185654
HG03439	MSL	AFR	227	1921	88	18	31	0.136564
HG03559	MSL	AFR	237	1893	104	14	40	0.168776
HG03473	MSL	AFR	239	1895	94	18	45	0.188285
HG03061	MSL	AFR	241	1901	85	16	43	0.178423
HG03078	MSL	AFR	222	1907	100	14	44	0.198198
HG03557	MSL	AFR	243	1879	105	16	49	0.201646
HG03074	MSL	AFR	233	1900	81	19	43	0.184549
HG03577	MSL	AFR	228	1889	98	18	49	0.214912
HG03397	MSL	AFR	228	1864	122	12	46	0.201754
HG03130	ESN	AFR	253	2058	106	10	52	0.205534
HG02943	ESN	AFR	248	2041	107	18	49	0.197581
HG03499	ESN	AFR	274	2004	116	19	53	0.193431
HG03369	ESN	AFR	257	2030	103	16	42	0.163424
HG03195	ESN	AFR	254	2019	113	14	46	0.181102
HG03514	ESN	AFR	248	2046	88	17	45	0.181452
HG03301	ESN	AFR	238	2027	104	18	52	0.218487
HG03342	ESN	AFR	263	1990	112	20	57	0.21673
HG03280	ESN	AFR	257	1990	116	21	60	0.233463
HG02944	ESN	AFR	263	1986	118	16	38	0.144487
HG03120	ESN	AFR	267	1995	100	20	60	0.224719
HG03300	ESN	AFR	222	2021	122	17	36	0.162162
HG02938	ESN	AFR	252	1998	103	15	53	0.210317
HG03372	ESN	AFR	231	2017	102	18	52	0.225108
HG03267	ESN	AFR	250	1983	116	17	51	0.204
HG03103	ESN	AFR	250	1994	102	17	47	0.188
HG03517	ESN	AFR	252	1991	102	18	60	0.238095
HG03121	ESN	AFR	262	1975	108	15	61	0.232824
HG03126	ESN	AFR	239	1989	116	13	42	0.175732
HG03127	ESN	AFR	250	1977	106	24	47	0.188
HG03202	ESN	AFR	254	1962	123	18	41	0.161417
HG03363	ESN	AFR	257	1971	110	15	44	0.171206
HG03159	ESN	AFR	257	1975	101	18	50	0.194553
HG03162	ESN	AFR	238	1992	104	15	55	0.231092
HG03520	ESN	AFR	243	1980	111	15	49	0.201646
HG03198	ESN	AFR	242	1977	104	19	50	0.206612
HG02952	ESN	AFR	259	1949	106	22	52	0.200772
HG03099	ESN	AFR	240	1986	90	20	48	0.2
HG03123	ESN	AFR	274	1941	101	20	56	0.20438
HG03189	ESN	AFR	241	1997	82	14	45	0.186722
HG03265	ESN	AFR	250	1958	104	22	56	0.224
HG03351	ESN	AFR	255	1956	108	15	50	0.196078
HG03118	ESN	AFR	244	1978	96	15	44	0.180328
HG03297	ESN	AFR	243	1964	109	17	46	0.1893
HG03511	ESN	AFR	258	1960	98	17	58	0.224806
HG03270	ESN	AFR	260	1957	100	14	54	0.207692
HG02970	ESN	AFR	251	1941	121	17	49	0.195219
HG03367	ESN	AFR	249	1964	102	15	51	0.204819
HG02941	ESN	AFR	233	1980	101	15	44	0.188841
HG03168	ESN	AFR	251	1965	102	11	47	0.187251
HG03515	ESN	AFR	253	1960	98	17	50	0.197628
HG03105	ESN	AFR	255	1959	96	17	47	0.184314
HG03117	ESN	AFR	266	1946	98	16	49	0.184211
HG03271	ESN	AFR	255	1943	109	17	47	0.184314
HG02974	ESN	AFR	224	1988	93	18	48	0.214286
HG02946	ESN	AFR	259	1936	109	15	51	0.196911
HG03303	ESN	AFR	279	1909	105	24	61	0.218638
HG03108	ESN	AFR	252	1937	100	18	57	0.22619
HG03279	ESN	AFR	234	1971	88	14	48	0.205128
HG03354	ESN	AFR	243	1937	108	17	48	0.197531
HG03370	ESN	AFR	231	1960	100	14	43	0.186147
HG03343	ESN	AFR	254	1925	105	20	47	0.185039
HG02968	ESN	AFR	251	1926	105	19	51	0.203187
HG02947	ESN	AFR	246	1933	103	18	52	0.211382
HG02979	ESN	AFR	247	1928	106	19	50	0.202429
HG03294	ESN	AFR	254	1929	103	14	41	0.161417
HG03268	ESN	AFR	222	1952	107	15	39	0.175676
HG03133	ESN	AFR	231	1937	104	19	48	0.207792
HG03366	ESN	AFR	253	1912	105	18	51	0.201581
HG03132	ESN	AFR	255	1911	107	14	43	0.168627
HG03163	ESN	AFR	227	1942	101	17	44	0.193833
HG03166	ESN	AFR	232	1933	103	17	44	0.189655
HG03304	ESN	AFR	244	1917	104	20	44	0.180328
HG03291	ESN	AFR	246	1911	106	19	57	0.231707
HG03193	ESN	AFR	252	1905	104	20	45	0.178571
HG03199	ESN	AFR	234	1915	111	19	47	0.200855
HG03518	ESN	AFR	250	1918	94	17	54	0.216
HG03109	ESN	AFR	255	1907	101	15	42	0.164706
HG03136	ESN	AFR	247	1914	99	18	50	0.202429
HG03139	ESN	AFR	251	1912	103	12	52	0.207171
HG02922	ESN	AFR	234	1909	113	20	55	0.235043
HG03169	ESN	AFR	226	1951	83	15	45	0.199115
HG03311	ESN	AFR	254	1911	97	13	35	0.137795
HG03114	ESN	AFR	249	1898	107	17	51	0.204819
HG02923	ESN	AFR	237	1916	101	15	55	0.232068
HG03313	ESN	AFR	261	1895	95	16	45	0.172414
HG03295	ESN	AFR	229	1908	106	22	51	0.222707
HG02976	ESN	AFR	244	1902	101	16	46	0.188525
HG03100	ESN	AFR	236	1912	97	17	55	0.233051
HG03157	ESN	AFR	238	1908	98	18	53	0.222689
HG03175	ESN	AFR	236	1918	93	15	45	0.190678
HG03111	ESN	AFR	245	1889	103	19	50	0.204082
HG03124	ESN	AFR	248	1908	85	14	47	0.189516
HG02973	ESN	AFR	238	1891	103	18	47	0.197479
HG03135	ESN	AFR	226	1921	84	19	50	0.221239
HG03352	ESN	AFR	238	1890	106	16	51	0.214286
HG03129	ESN	AFR	252	1876	106	15	45	0.178571
HG03521	ESN	AFR	238	1883	108	19	47	0.197479
HG02981	ESN	AFR	246	1875	106	19	47	0.191057
HG03115	ESN	AFR	238	1892	96	18	42	0.176471
HG03172	ESN	AFR	251	1867	100	20	47	0.187251
HG02953	ESN	AFR	240	1874	103	18	61	0.254167
HG03190	ESN	AFR	225	1877	110	19	44	0.195556
HG03298	ESN	AFR	229	1870	111	21	46	0.200873
HG02977	ESN	AFR	228	1885	94	15	43	0.188596
HG03196	ESN	AFR	225	1877	100	17	43	0.191111
HG02971	ESN	AFR	227	1873	102	15	49	0.215859
HG03160	ESN	AFR	210	1873	105	20	45	0.214286
HG03112	ESN	AFR	239	1835	114	16	54	0.225941
NA20287	ASW	AFR	273	2016	102	14	62	0.227106
NA19917	ASW	AFR	252	1987	105	15	53	0.210317
NA19901	ASW	AFR	220	1993	122	17	42	0.190909
NA19909	ASW	AFR	255	1965	99	21	49	0.192157
NA20356	ASW	AFR	246	1968	98	17	48	0.195122
NA20127	ASW	AFR	245	1949	110	18	52	0.212245
NA19916	ASW	AFR	228	1968	106	17	47	0.20614
NA19835	ASW	AFR	255	1932	114	15	54	0.211765
NA19982	ASW	AFR	245	1934	102	18	41	0.167347
NA20294	ASW	AFR	243	1917	117	22	52	0.213992
NA19712	ASW	AFR	240	1944	100	14	37	0.154167
NA20298	ASW	AFR	240	1931	114	13	59	0.245833
NA20291	ASW	AFR	267	1925	89	16	46	0.172285
NA19920	ASW	AFR	237	1937	105	16	47	0.198312
NA19701	ASW	AFR	245	1927	105	16	62	0.253061
NA20320	ASW	AFR	243	1927	105	18	51	0.209877
NA19711	ASW	AFR	243	1925	104	20	42	0.17284
NA20296	ASW	AFR	249	1917	105	17	51	0.204819
NA20126	ASW	AFR	247	1922	101	12	48	0.194332
NA20339	ASW	AFR	277	1873	110	19	46	0.166065
NA19700	ASW	AFR	229	1933	95	15	51	0.222707
NA19625	ASW	AFR	242	1905	102	19	52	0.214876
NA20281	ASW	AFR	216	1929	104	17	38	0.175926
NA19913	ASW	AFR	226	1930	95	14	56	0.247788
NA20318	ASW	AFR	234	1898	117	13	48	0.205128
NA19908	ASW	AFR	243	1901	99	17	42	0.17284
NA19704	ASW	AFR	255	1882	99	20	52	0.203922
NA20321	ASW	AFR	231	1905	103	17	46	0.199134
NA19834	ASW	AFR	240	1898	98	17	47	0.195833
NA20317	ASW	AFR	247	1876	108	15	41	0.165992
NA19904	ASW	AFR	241	1896	95	13	46	0.190871
NA20278	ASW	AFR	250	1853	115	22	52	0.208
NA20357	ASW	AFR	225	1888	111	15	48	0.213333
NA20276	ASW	AFR	262	1846	116	14	56	0.21374
NA20340	ASW	AFR	239	1883	97	18	48	0.200837
NA19703	ASW	AFR	247	1866	94	21	41	0.165992
NA20334	ASW	AFR	250	1855	112	11	46	0.184
NA20289	ASW	AFR	238	1874	97	18	47	0.197479
NA20332	ASW	AFR	245	1863	102	17	45	0.183673
NA20282	ASW	AFR	229	1870	108	16	51	0.222707
NA19900	ASW	AFR	239	1863	106	12	53	0.221757
NA19713	ASW	AFR	243	1860	97	17	48	0.197531
NA19984	ASW	AFR	250	1845	103	17	46	0.184
NA20355	ASW	AFR	240	1841	108	13	45	0.1875
NA20299	ASW	AFR	243	1841	95	22	51	0.209877
NA20342	ASW	AFR	236	1856	91	18	42	0.177966
NA20359	ASW	AFR	239	1843	103	14	49	0.205021
NA19922	ASW	AFR	229	1841	108	19	48	0.209607
NA19914	ASW	AFR	235	1843	96	18	45	0.191489
NA20412	ASW	AFR	215	1854	109	14	40	0.186047
NA19818	ASW	AFR	241	1834	99	13	51	0.211618
NA20346	ASW	AFR	246	1812	106	17	49	0.199187
NA20362	ASW	AFR	236	1819	100	16	55	0.233051
NA20351	ASW	AFR	228	1819	101	17	41	0.179825
NA19707	ASW	AFR	238	1812	97	16	41	0.172269
NA20348	ASW	AFR	225	1810	105	16	41	0.182222
NA19921	ASW	AFR	241	1800	91	17	48	0.19917
NA19819	ASW	AFR	250	1781	93	17	46	0.184
NA20274	ASW	AFR	243	1779	100	17	50	0.205761
NA19923	ASW	AFR	242	1776	107	11	50	0.206612
NA20314	ASW	AFR	205	1594	76	13	40	0.195122
HG01241	PUR	AMR	217	1862	98	15	45	0.207373
HG01108	PUR	AMR	245	1835	90	16	46	0.187755
HG01242	PUR	AMR	247	1801	94	16	50	0.202429
HG01063	PUR	AMR	233	1777	97	14	49	0.2103
HG01107	PUR	AMR	233	1763	94	17	44	0.188841
HG01176	PUR	AMR	217	1753	95	18	45	0.207373
HG01082	PUR	AMR	228	1744	90	18	49	0.214912
HG01248	PUR	AMR	230	1714	105	16	50	0.217391
HG01089	PUR	AMR	243	1722	84	14	55	0.226337
HG01102	PUR	AMR	245	1707	93	15	45	0.183673
HG01069	PUR	AMR	245	1698	98	16	44	0.179592
HG01049	PUR	AMR	223	1727	88	17	46	0.206278
HG01393	PUR	AMR	227	1722	86	14	45	0.198238
HG01092	PUR	AMR	223	1709	94	21	50	0.224215
HG01305	PUR	AMR	229	1711	94	13	44	0.19214
HG01402	PUR	AMR	225	1727	79	16	47	0.208889
HG00638	PUR	AMR	235	1703	93	14	49	0.208511
HG01111	PUR	AMR	239	1703	86	13	46	0.192469
HG01167	PUR	AMR	233	1696	93	14	41	0.175966
HG01188	PUR	AMR	222	1713	81	18	50	0.225225
HG01198	PUR	AMR	225	1693	97	14	43	0.191111
HG01060	PUR	AMR	219	1691	86	13	44	0.200913
HG01048	PUR	AMR	227	1676	87	17	45	0.198238
HG01064	PUR	AMR	219	1674	98	16	54	0.246575
HG01075	PUR	AMR	221	1678	91	14	45	0.20362
HG01205	PUR	AMR	222	1669	100	12	45	0.202703
HG01413	PUR	AMR	239	1666	77	19	43	0.179916
HG01396	PUR	AMR	227	1661	93	15	39	0.171806
HG00553	PUR	AMR	214	1670	91	19	46	0.214953
HG01187	PUR	AMR	242	1653	82	16	49	0.202479
HG01392	PUR	AMR	212	1675	91	14	41	0.193396
HG00742	PUR	AMR	225	1665	88	13	47	0.208889
HG01088	PUR	AMR	227	1664	84	16	45	0.198238
HG01098	PUR	AMR	228	1665	80	18	42	0.184211
HG01110	PUR	AMR	213	1667	93	18	37	0.173709
HG01161	PUR	AMR	201	1673	99	18	40	0.199005
HG01414	PUR	AMR	212	1673	90	15	40	0.188679
HG01077	PUR	AMR	211	1678	84	15	41	0.194313
HG01083	PUR	AMR	226	1666	78	18	49	0.216814
HG01171	PUR	AMR	204	1676	93	15	39	0.191176
HG01312	PUR	AMR	230	1657	90	9	42	0.182609
HG01094	PUR	AMR	213	1665	92	15	39	0.183099
HG01323	PUR	AMR	224	1655	84	22	48	0.214286
HG01177	PUR	AMR	220	1657	93	14	41	0.186364
HG01079	PUR	AMR	216	1670	80	16	43	0.199074
HG01080	PUR	AMR	224	1656	88	14	37	0.165179
HG01286	PUR	AMR	213	1669	85	15	42	0.197183
HG00734	PUR	AMR	229	1638	95	19	43	0.187773
HG01182	PUR	AMR	220	1650	91	17	42	0.190909
HG00740	PUR	AMR	213	1652	95	13	44	0.206573
HG01101	PUR	AMR	225	1649	86	13	45	0.2
HG00743	PUR	AMR	232	1641	85	14	48	0.206897
HG00641	PUR	AMR	225	1635	99	12	49	0.217778
HG01183	PUR	AMR	230	1639	84	16	53	0.230435
HG01085	PUR	AMR	211	1664	81	12	46	0.218009
HG01055	PUR	AMR	227	1633	92	13	45	0.198238
HG01052	PUR	AMR	216	1642	91	15	40	0.185185
HG01247	PUR	AMR	205	1643	98	15	43	0.209756
HG01164	PUR	AMR	232	1624	88	16	41	0.176724
HG01086	PUR	AMR	219	1632	90	15	52	0.237443
HG01162	PUR	AMR	217	1638	87	14	43	0.198157
HG01067	PUR	AMR	214	1640	90	11	40	0.186916
HG01051	PUR	AMR	211	1643	83	16	38	0.180095
HG01302	PUR	AMR	214	1644	80	15	41	0.191589
HG01326	PUR	AMR	223	1629	85	16	47	0.210762
HG00637	PUR	AMR	217	1633	89	13	44	0.202765
HG01308	PUR	AMR	216	1634	84	15	46	0.212963
HG00551	PUR	AMR	215	1643	77	13	49	0.227907
HG01058	PUR	AMR	214	1634	84	15	49	0.228972
HG01104	PUR	AMR	209	1628	92	17	41	0.196172
HG01168	PUR	AMR	214	1621	93	17	46	0.214953
HG01398	PUR	AMR	221	1618	92	14	41	0.18552
HG01105	PUR	AMR	206	1632	93	11	45	0.218447
HG01190	PUR	AMR	197	1641	90	13	38	0.192893
HG01191	PUR	AMR	201	1640	84	15	38	0.189055
HG01200	PUR	AMR	228	1627	75	10	41	0.179825
HG01170	PUR	AMR	201	1642	82	13	41	0.20398
HG01061	PUR	AMR	217	1613	89	16	47	0.21659
HG01197	PUR	AMR	217	1614	87	14	45	0.207373
HG01204	PUR	AMR	208	1615	92	17	48	0.230769
HG01047	PUR	AMR	222	1620	78	11	40	0.18018
HG01325	PUR	AMR	208	1622	86	13	44	0.211538
HG01403	PUR	AMR	238	1602	72	16	46	0.193277
HG01405	PUR	AMR	206	1624	77	13	35	0.169903
HG01095	PUR	AMR	200	1621	83	15	46	0.23
HG01173	PUR	AMR	204	1625	76	13	42	0.205882
HG01412	PUR	AMR	201	1617	81	16	42	0.208955
HG00737	PUR	AMR	201	1607	91	12	44	0.218905
HG01072	PUR	AMR	219	1583	93	15	43	0.196347
HG01097	PUR	AMR	223	1576	94	17	50	0.224215
HG00731	PUR	AMR	226	1574	93	15	41	0.181416
HG01073	PUR	AMR	229	1579	85	14	46	0.200873
HG00739	PUR	AMR	205	1596	91	14	37	0.180488
HG01174	PUR	AMR	205	1590	85	17	40	0.195122
HG01066	PUR	AMR	222	1564	86	15	42	0.189189
HG01311	PUR	AMR	214	1574	80	13	47	0.219626
HG01070	PUR	AMR	214	1561	91	12	42	0.196262
HG00640	PUR	AMR	237	1541	80	15	50	0.21097
HG01395	PUR	AMR	222	1546	81	15	42	0.189189
HG01054	PUR	AMR	202	1553	90	18	42	0.207921
HG00554	PUR	AMR	237	1532	79	12	44	0.185654
HG00732	PUR	AMR	214	1534	98	14	45	0.21028
HG01303	PUR	AMR	191	1568	79	14	47	0.246073
HG00736	PUR	AMR	194	1525	80	14	39	0.201031
HG01551	CLM	AMR	237	1783	90	14	46	0.194093
HG01342	CLM	AMR	248	1725	92	11	49	0.197581
HG01464	CLM	AMR	230	1724	88	20	44	0.191304
HG01149	CLM	AMR	220	1732	91	16	40	0.181818
HG01485	CLM	AMR	210	1741	84	13	43	0.204762
HG01462	CLM	AMR	237	1716	80	11	43	0.181435
HG01556	CLM	AMR	221	1694	99	14	43	0.19457
HG01134	CLM	AMR	237	1690	84	13	40	0.168776
HG01142	CLM	AMR	210	1705	93	14	41	0.195238
HG01390	CLM	AMR	232	1666	103	11	48	0.206897
HG01251	CLM	AMR	233	1668	86	19	46	0.197425
HG01366	CLM	AMR	214	1679	92	15	45	0.21028
HG01136	CLM	AMR	219	1681	83	14	47	0.214612
HG01353	CLM	AMR	220	1676	86	14	38	0.172727
HG01139	CLM	AMR	241	1665	77	12	44	0.182573
HG01260	CLM	AMR	224	1661	90	16	48	0.214286
HG01254	CLM	AMR	228	1670	77	13	50	0.219298
HG01360	CLM	AMR	250	1643	79	16	44	0.176
HG01444	CLM	AMR	215	1653	101	19	36	0.167442
HG01377	CLM	AMR	223	1661	85	17	50	0.224215
HG01256	CLM	AMR	231	1644	86	13	48	0.207792
HG01131	CLM	AMR	216	1654	86	15	37	0.171296
HG01494	CLM	AMR	223	1658	77	12	46	0.206278
HG01363	CLM	AMR	213	1640	97	19	46	0.215962
HG01431	CLM	AMR	246	1622	87	14	41	0.166667
HG01488	CLM	AMR	218	1641	93	17	47	0.215596
HG01122	CLM	AMR	223	1634	96	15	43	0.192825
HG01362	CLM	AMR	218	1648	90	11	47	0.215596
HG01378	CLM	AMR	219	1641	90	17	42	0.191781
HG01491	CLM	AMR	222	1635	97	13	42	0.189189
HG01125	CLM	AMR	216	1652	83	15	41	0.189815
HG01461	CLM	AMR	211	1646	87	19	32	0.151659
HG01372	CLM	AMR	226	1637	80	17	41	0.181416
HG01489	CLM	AMR	221	1637	88	14	42	0.190045
HG01272	CLM	AMR	196	1663	81	17	37	0.188776
HG01250	CLM	AMR	209	1650	80	15	49	0.23445
HG01280	CLM	AMR	221	1636	81	15	44	0.199095
HG01498	CLM	AMR	223	1630	83	14	50	0.224215
HG01495	CLM	AMR	213	1633	85	18	41	0.192488
HG01389	CLM	AMR	219	1636	81	12	47	0.214612
HG01440	CLM	AMR	216	1632	82	18	37	0.171296
HG01356	CLM	AMR	213	1631	85	15	40	0.187793
HG01435	CLM	AMR	233	1615	80	14	48	0.206009
HG01269	CLM	AMR	228	1599	97	16	47	0.20614
HG01284	CLM	AMR	227	1614	84	14	54	0.237885
HG01369	CLM	AMR	217	1614	91	17	41	0.18894
HG01137	CLM	AMR	226	1618	80	14	53	0.234513
HG01341	CLM	AMR	229	1605	91	13	53	0.231441
HG01140	CLM	AMR	220	1616	82	18	45	0.204545
HG01253	CLM	AMR	218	1621	85	11	45	0.206422
HG01257	CLM	AMR	220	1608	93	13	43	0.195455
HG01365	CLM	AMR	218	1629	73	14	52	0.238532
HG01374	CLM	AMR	203	1634	83	14	35	0.172414
HG01497	CLM	AMR	221	1614	83	15	40	0.180995
HG01124	CLM	AMR	208	1620	89	14	38	0.182692
HG01113	CLM	AMR	227	1605	83	13	52	0.229075
HG01375	CLM	AMR	222	1602	88	14	49	0.220721
HG01447	CLM	AMR	222	1603	88	12	54	0.243243
HG01112	CLM	AMR	220	1610	81	12	48	0.218182
HG01359	CLM	AMR	217	1609	80	16	49	0.225806
HG01354	CLM	AMR	221	1611	75	13	33	0.149321
HG01459	CLM	AMR	212	1603	90	15	43	0.20283
HG01384	CLM	AMR	204	1612	84	17	42	0.205882
HG01345	CLM	AMR	215	1595	92	14	35	0.162791
HG01271	CLM	AMR	213	1593	90	15	40	0.187793
HG01455	CLM	AMR	210	1603	82	15	36	0.171429
HG01119	CLM	AMR	208	1603	85	13	49	0.235577
HG01383	CLM	AMR	203	1596	85	19	36	0.17734
HG01121	CLM	AMR	191	1608	82	19	43	0.225131
HG01130	CLM	AMR	230	1570	83	16	51	0.221739
HG01456	CLM	AMR	208	1590	89	12	47	0.225962
HG01468	CLM	AMR	199	1604	79	16	38	0.190955
HG01259	CLM	AMR	214	1582	88	12	45	0.21028
HG01486	CLM	AMR	215	1580	84	17	51	0.237209
HG01357	CLM	AMR	197	1592	84	15	43	0.218274
HG01133	CLM	AMR	221	1568	84	14	44	0.199095
HG01148	CLM	AMR	208	1584	80	15	38	0.182692
HG01277	CLM	AMR	223	1569	81	14	45	0.201794
HG01550	CLM	AMR	208	1572	92	15	44	0.211538
HG01348	CLM	AMR	207	1577	83	14	44	0.21256
HG01465	CLM	AMR	211	1577	77	12	41	0.194313
HG01441	CLM	AMR	205	1557	89	11	40	0.195122
HG01275	CLM	AMR	200	1558	86	17	36	0.18
HG01437	CLM	AMR	205	1547	89	16	39	0.190244
HG01350	CLM	AMR	200	1556	84	16	44	0.22
HG01443	CLM	AMR	205	1553	81	16	39	0.190244
HG01474	CLM	AMR	206	1557	73	15	46	0.223301
HG01432	CLM	AMR	209	1534	87	19	47	0.22488
HG01438	CLM	AMR	196	1560	78	15	44	0.22449
HG01344	CLM	AMR	213	1538	78	11	42	0.197183
HG01351	CLM	AMR	206	1539	79	16	45	0.218447
HG01479	CLM	AMR	212	1529	86	13	50	0.235849
HG01492	CLM	AMR	208	1541	78	11	42	0.201923
HG01281	CLM	AMR	197	1542	81	17	41	0.208122
HG02006	PEL	AMR	234	1777	91	9	50	0.213675
HG02274	PEL	AMR	251	1741	88	16	51	0.203187
HG01948	PEL	AMR	238	1720	89	16	37	0.155462
HG02090	PEL	AMR	225	1695	89	19	40	0.177778
HG01933	PEL	AMR	232	1677	99	18	44	0.189655
HG01924	PEL	AMR	231	1683	90	14	52	0.225108
HG01965	PEL	AMR	238	1677	80	15	44	0.184874
HG01893	PEL	AMR	225	1690	82	10	40	0.177778
HG02312	PEL	AMR	227	1652	86	17	48	0.211454
HG01935	PEL	AMR	220	1655	84	17	40	0.181818
HG02304	PEL	AMR	212	1672	73	17	32	0.150943
HG01947	PEL	AMR	237	1634	86	13	46	0.194093
HG01971	PEL	AMR	200	1666	89	15	42	0.21
HG01944	PEL	AMR	234	1623	88	14	38	0.162393
HG01950	PEL	AMR	214	1641	83	15	44	0.205607
HG01577	PEL	AMR	226	1619	90	14	40	0.176991
HG01945	PEL	AMR	219	1633	82	13	41	0.187215
HG01979	PEL	AMR	233	1603	92	17	46	0.197425
HG02253	PEL	AMR	215	1623	94	13	44	0.204651
HG02298	PEL	AMR	218	1629	84	14	45	0.206422
HG01936	PEL	AMR	206	1644	81	11	44	0.213592
HG02150	PEL	AMR	200	1648	79	14	38	0.19
HG01565	PEL	AMR	215	1629	82	14	45	0.209302
HG02089	PEL	AMR	206	1638	75	14	39	0.18932
HG02425	PEL	AMR	218	1608	88	14	45	0.206422
HG01976	PEL	AMR	222	1613	76	16	44	0.198198
HG02102	PEL	AMR	222	1613	78	14	45	0.202703
HG01892	PEL	AMR	223	1607	81	14	37	0.165919
HG01927	PEL	AMR	217	1613	81	11	42	0.193548
HG01954	PEL	AMR	207	1617	84	12	46	0.222222
HG02252	PEL	AMR	245	1577	84	12	48	0.195918
HG02285	PEL	AMR	198	1628	76	15	42	0.212121
HG01951	PEL	AMR	217	1591	92	15	39	0.179724
HG01932	PEL	AMR	206	1607	91	10	32	0.15534
HG01939	PEL	AMR	226	1578	97	12	50	0.221239
HG01980	PEL	AMR	201	1606	90	16	34	0.169154
HG01941	PEL	AMR	217	1595	84	13	45	0.207373
HG01982	PEL	AMR	204	1598	93	14	46	0.22549
HG01967	PEL	AMR	194	1609	93	12	45	0.231959
HG02008	PEL	AMR	224	1593	79	12	41	0.183036
HG02345	PEL	AMR	214	1585	94	14	40	0.186916
HG02003	PEL	AMR	218	1590	84	14	43	0.197248
HG02262	PEL	AMR	201	1610	79	14	43	0.21393
HG01973	PEL	AMR	203	1588	95	16	43	0.211823
HG01918	PEL	AMR	222	1566	86	18	41	0.184685
HG02278	PEL	AMR	207	1590	80	15	34	0.164251
HG02286	PEL	AMR	201	1603	73	14	40	0.199005
HG02260	PEL	AMR	221	1569	86	14	46	0.208145
HG02301	PEL	AMR	216	1578	83	12	39	0.180556
HG02266	PEL	AMR	189	1603	78	17	37	0.195767
HG02291	PEL	AMR	219	1571	80	17	45	0.205479
HG02292	PEL	AMR	199	1590	80	15	37	0.18593
HG02104	PEL	AMR	211	1579	80	11	41	0.194313
HG01921	PEL	AMR	216	1569	82	11	44	0.203704
HG02002	PEL	AMR	209	1570	85	13	43	0.205742
HG01571	PEL	AMR	221	1560	77	15	41	0.18552
HG01942	PEL	AMR	217	1556	83	16	45	0.207373
HG01968	PEL	AMR	216	1569	74	13	42	0.194444
HG01991	PEL	AMR	206	1567	86	13	44	0.213592
HG01961	PEL	AMR	205	1564	88	14	44	0.214634
HG01566	PEL	AMR	211	1569	78	12	41	0.194313
HG01997	PEL	AMR	211	1563	81	14	41	0.194313
HG01578	PEL	AMR	216	1545	93	13	43	0.199074
HG01926	PEL	AMR	214	1557	82	14	39	0.182243
HG01938	PEL	AMR	203	1562	82	12	39	0.192118
HG02272	PEL	AMR	218	1542	82	15	47	0.215596
HG01572	PEL	AMR	200	1569	74	13	40	0.2
HG02277	PEL	AMR	208	1552	79	16	41	0.197115
HG01953	PEL	AMR	210	1555	75	13	35	0.166667
HG01992	PEL	AMR	212	1550	77	14	38	0.179245
HG02348	PEL	AMR	198	1553	88	13	34	0.171717
HG01920	PEL	AMR	227	1534	78	11	42	0.185022
HG02275	PEL	AMR	226	1531	78	15	46	0.20354
HG02271	PEL	AMR	209	1538	77	14	40	0.191388
HG01977	PEL	AMR	200	1538	83	14	37	0.185
HG01974	PEL	AMR	200	1540	79	14	37	0.185
HG02147	PEL	AMR	210	1528	80	15	38	0.180952
HG01923	PEL	AMR	207	1525	86	13	34	0.164251
HG01970	PEL	AMR	215	1522	77	13	42	0.195349
HG01917	PEL	AMR	209	1518	84	15	42	0.200957
HG02105	PEL	AMR	201	1535	76	12	44	0.218905
HG02146	PEL	AMR	208	1512	81	13	42	0.201923
HG02299	PEL	AMR	210	1500	76	17	45	0.214286
HG02265	PEL	AMR	204	1499	76	9	48	0.235294
HG02259	PEL	AMR	192	1457	87	10	42	0.21875
NA19789	MXL	AMR	223	1699	89	14	46	0.206278
NA19761	MXL	AMR	234	1684	84	18	49	0.209402
NA19658	MXL	AMR	217	1702	82	17	42	0.193548
NA19752	MXL	AMR	251	1663	82	17	48	0.191235
NA19792	MXL	AMR	244	1654	94	12	53	0.217213
NA19762	MXL	AMR	214	1677	95	12	37	0.172897
NA19774	MXL	AMR	209	1678	94	12	42	0.200957
NA19777	MXL	AMR	229	1656	94	13	48	0.209607
NA19756	MXL	AMR	238	1657	82	13	48	0.201681
NA19779	MXL	AMR	228	1645	92	17	44	0.192982
NA19716	MXL	AMR	222	1654	91	14	41	0.184685
NA19776	MXL	AMR	223	1652	93	13	41	0.183857
NA19770	MXL	AMR	215	1654	95	13	44	0.204651
NA19651	MXL	AMR	198	1662	101	15	40	0.20202
NA19720	MXL	AMR	214	1650	96	15	42	0.196262
NA19786	MXL	AMR	232	1649	82	11	48	0.206897
NA19652	MXL	AMR	212	1655	88	15	43	0.20283
NA19740	MXL	AMR	227	1639	91	13	42	0.185022
NA19664	MXL	AMR	220	1640	92	15	39	0.177273
NA19717	MXL	AMR	215	1657	78	17	42	0.195349
NA19654	MXL	AMR	223	1643	83	17	45	0.201794
NA19755	MXL	AMR	221	1642	90	11	48	0.217195
NA19788	MXL	AMR	240	1636	77	11	42	0.175
NA19719	MXL	AMR	227	1638	83	14	47	0.207048
NA19725	MXL	AMR	228	1634	84	16	51	0.223684
NA19795	MXL	AMR	209	1643	93	17	40	0.191388
NA19773	MXL	AMR	211	1649	86	12	46	0.218009
NA19785	MXL	AMR	213	1636	92	17	46	0.215962
NA19657	MXL	AMR	214	1628	96	14	48	0.224299
NA19771	MXL	AMR	236	1606	94	15	59	0.25
NA19663	MXL	AMR	202	1648	86	13	45	0.222772
NA19746	MXL	AMR	227	1633	76	13	38	0.167401
NA19794	MXL	AMR	216	1640	83	9	43	0.199074
NA19723	MXL	AMR	219	1616	89	16	47	0.214612
NA19729	MXL	AMR	230	1601	92	17	41	0.178261
NA19782	MXL	AMR	219	1616	92	10	45	0.205479
NA19676	MXL	AMR	218	1620	84	14	39	0.178899
NA19747	MXL	AMR	221	1603	91	15	40	0.180995
NA19731	MXL	AMR	209	1627	83	10	46	0.220096
NA19648	MXL	AMR	207	1621	83	16	45	0.217391
NA19764	MXL	AMR	206	1611	92	15	41	0.199029
NA19682	MXL	AMR	214	1594	90	14	43	0.200935
NA19750	MXL	AMR	215	1598	81	14	53	0.246512
NA19678	MXL	AMR	212	1588	87	15	44	0.207547
NA19735	MXL	AMR	217	1587	80	16	45	0.207373
NA19681	MXL	AMR	225	1577	84	13	43	0.191111
NA19669	MXL	AMR	219	1585	81	13	47	0.214612
NA19780	MXL	AMR	217	1568	90	18	47	0.21659
NA19726	MXL	AMR	208	1590	81	13	45	0.216346
NA19741	MXL	AMR	224	1571	83	13	44	0.196429
NA19759	MXL	AMR	228	1566	81	14	49	0.214912
NA19749	MXL	AMR	216	1571	82	16	43	0.199074
NA19734	MXL	AMR	191	1594	84	15	35	0.183246
NA19661	MXL	AMR	214	1567	87	15	40	0.186916
NA19758	MXL	AMR	202	1584	80	14	42	0.207921
NA19670	MXL	AMR	202	1580	83	14	36	0.178218
NA19722	MXL	AMR	203	1584	80	12	39	0.192118
NA19655	MXL	AMR	206	1571	85	16	36	0.174757
NA19684	MXL	AMR	203	1575	78	14	39	0.192118
NA19649	MXL	AMR	205	1557	88	9	43	0.209756
NA19732	MXL	AMR	221	1539	81	15	42	0.190045
NA19783	MXL	AMR	203	1534	80	13	40	0.197044
NA19679	MXL	AMR	192	1503	85	13	36	0.1875
NA19728	MXL	AMR	216	1481	80	12	44	0.203704
HG02016	KHV	EAS	221	1707	89	17	41	0.18552
HG02140	KHV	EAS	226	1695	94	16	48	0.212389
HG02127	KHV	EAS	244	1663	98	13	52	0.213115
HG02137	KHV	EAS	235	1671	94	14	46	0.195745
HG01850	KHV	EAS	223	1678	90	17	42	0.188341
HG01600	KHV	EAS	228	1682	82	12	41	0.179825
HG02031	KHV	EAS	224	1676	87	15	40	0.178571
HG02029	KHV	EAS	221	1672	89	13	40	0.180995
HG01595	KHV	EAS	208	1668	99	16	37	0.177885
HG02122	KHV	EAS	243	1645	86	15	46	0.1893
HG02141	KHV	EAS	224	1665	83	16	42	0.1875
HG01599	KHV	EAS	239	1650	84	13	50	0.209205
HG02067	KHV	EAS	228	1652	86	15	51	0.223684
HG01852	KHV	EAS	233	1638	92	15	47	0.201717
HG02072	KHV	EAS	235	1624	97	13	48	0.204255
HG02142	KHV	EAS	229	1640	80	17	46	0.200873
HG01848	KHV	EAS	217	1642	89	13	42	0.193548
HG02134	KHV	EAS	227	1628	92	11	41	0.180617
HG01597	KHV	EAS	223	1634	85	15	37	0.165919
HG01855	KHV	EAS	224	1625	92	15	45	0.200893
HG02078	KHV	EAS	209	1651	82	14	41	0.196172
HG01878	KHV	EAS	223	1631	88	12	52	0.233184
HG02133	KHV	EAS	227	1621	91	14	42	0.185022
HG01862	KHV	EAS	225	1630	85	12	40	0.177778
HG02023	KHV	EAS	228	1625	84	15	43	0.188596
HG01851	KHV	EAS	229	1617	89	15	34	0.148472
HG02048	KHV	EAS	246	1594	96	13	45	0.182927
HG02058	KHV	EAS	220	1628	84	17	44	0.2
HG01873	KHV	EAS	223	1620	91	14	44	0.197309
HG02075	KHV	EAS	208	1640	84	15	37	0.177885
HG01872	KHV	EAS	220	1619	89	18	45	0.204545
HG02020	KHV	EAS	216	1633	81	16	46	0.212963
HG02057	KHV	EAS	223	1615	94	14	39	0.174888
HG02073	KHV	EAS	224	1614	94	14	47	0.209821
HG02019	KHV	EAS	213	1629	87	15	38	0.178404
HG02513	KHV	EAS	227	1610	94	13	46	0.202643
HG02138	KHV	EAS	224	1618	83	17	44	0.196429
HG02079	KHV	EAS	220	1621	87	12	41	0.186364
HG01849	KHV	EAS	219	1611	94	13	43	0.196347
HG01846	KHV	EAS	212	1619	90	13	44	0.207547
HG01871	KHV	EAS	225	1613	84	10	34	0.151111
HG02081	KHV	EAS	190	1639	86	16	38	0.2
HG02087	KHV	EAS	226	1607	88	9	50	0.221239
HG02064	KHV	EAS	220	1610	83	16	43	0.195455
HG01840	KHV	EAS	238	1583	89	17	48	0.201681
HG02060	KHV	EAS	212	1599	100	16	41	0.193396
HG01598	KHV	EAS	213	1606	91	16	39	0.183099
HG01843	KHV	EAS	226	1601	84	14	39	0.172566
HG01842	KHV	EAS	236	1584	90	12	42	0.177966
HG01874	KHV	EAS	229	1584	94	15	39	0.170306
HG01853	KHV	EAS	210	1611	85	15	41	0.195238
HG02131	KHV	EAS	220	1599	88	13	43	0.195455
HG01845	KHV	EAS	221	1600	87	11	41	0.18552
HG01863	KHV	EAS	223	1592	89	15	46	0.206278
HG02139	KHV	EAS	217	1606	79	17	39	0.179724
HG02521	KHV	EAS	224	1582	100	12	41	0.183036
HG02040	KHV	EAS	229	1591	85	11	47	0.20524
HG01858	KHV	EAS	237	1570	88	20	54	0.227848
HG02035	KHV	EAS	209	1598	92	14	36	0.172249
HG02028	KHV	EAS	195	1624	81	11	40	0.205128
HG02049	KHV	EAS	213	1604	81	13	34	0.159624
HG01857	KHV	EAS	237	1559	89	17	48	0.202532
HG01865	KHV	EAS	220	1580	88	14	33	0.15
HG01596	KHV	EAS	228	1571	87	15	44	0.192982
HG02017	KHV	EAS	215	1580	87	17	46	0.213953
HG02113	KHV	EAS	204	1590	92	13	40	0.196078
HG01869	KHV	EAS	193	1596	95	14	31	0.160622
HG02069	KHV	EAS	214	1569	99	15	42	0.196262
HG01859	KHV	EAS	224	1574	84	14	50	0.223214
HG02130	KHV	EAS	221	1585	75	15	52	0.235294
HG01861	KHV	EAS	219	1570	92	14	50	0.228311
HG02512	KHV	EAS	236	1544	96	18	43	0.182203
HG02047	KHV	EAS	202	1586	87	18	38	0.188119
HG02025	KHV	EAS	214	1586	74	18	43	0.200935
HG02116	KHV	EAS	209	1587	84	12	33	0.157895
HG02082	KHV	EAS	208	1584	86	11	36	0.173077
HG02136	KHV	EAS	219	1570	88	12	42	0.191781
HG02032	KHV	EAS	223	1558	81	19	42	0.188341
HG01841	KHV	EAS	221	1566	81	12	39	0.176471
HG02026	KHV	EAS	215	1567	86	11	40	0.186047
HG02088	KHV	EAS	241	1539	83	16	50	0.207469
HG02121	KHV	EAS	217	1563	86	13	45	0.207373
HG02061	KHV	EAS	225	1560	80	12	41	0.182222
HG01866	KHV	EAS	231	1531	100	13	41	0.177489
HG01867	KHV	EAS	211	1555	95	13	44	0.208531
HG02084	KHV	EAS	217	1560	80	16	47	0.21659
HG01864	KHV	EAS	221	1555	79	16	41	0.18552
HG02050	KHV	EAS	241	1528	85	15	39	0.161826
HG01870	KHV	EAS	220	1549	85	14	46	0.209091
HG02076	KHV	EAS	219	1547	88	13	36	0.164384
HG01860	KHV	EAS	215	1553	81	16	43	0.2
HG02086	KHV	EAS	226	1553	75	11	48	0.212389
HG02522	KHV	EAS	228	1541	84	12	43	0.188596
HG02070	KHV	EAS	204	1573	73	11	36	0.176471
HG02085	KHV	EAS	223	1535	91	12	51	0.2287
HG02128	KHV	EAS	215	1538	92	12	43	0.2
HG01844	KHV	EAS	217	1536	80	18	38	0.175115
HG01847	KHV	EAS	226	1525	84	14	44	0.19469
HG01868	KHV	EAS	191	1558	85	14	33	0.172775
HG00629	CHS	EAS	242	1682	91	19	45	0.18595
HG00437	CHS	EAS	232	1644	97	12	45	0.193966
HG00623	CHS	EAS	236	1641	91	14	53	0.224576
HG00611	CHS	EAS	238	1637	88	16	50	0.210084
HG00596	CHS	EAS	236	1630	97	15	41	0.173729
HG00674	CHS	EAS	238	1627	97	15	47	0.197479
HG00500	CHS	EAS	226	1651	81	15	45	0.199115
HG00448	CHS	EAS	228	1629	99	15	39	0.171053
HG00651	CHS	EAS	235	1623	90	15	47	0.2
HG00704	CHS	EAS	230	1637	81	15	47	0.204348
HG00672	CHS	EAS	221	1639	87	15	44	0.199095
HG00608	CHS	EAS	253	1605	90	13	47	0.185771
HG00559	CHS	EAS	227	1632	84	12	48	0.211454
HG00662	CHS	EAS	211	1638	91	14	42	0.199052
HG00698	CHS	EAS	229	1625	88	12	42	0.183406
HG00428	CHS	EAS	245	1602	91	14	49	0.2
HG00543	CHS	EAS	216	1642	82	12	45	0.208333
HG00689	CHS	EAS	233	1625	80	14	40	0.171674
HG00729	CHS	EAS	224	1631	80	15	44	0.196429
HG00442	CHS	EAS	228	1619	85	16	51	0.223684
HG00410	CHS	EAS	231	1613	89	12	39	0.168831
HG00443	CHS	EAS	219	1621	88	17	49	0.223744
HG00693	CHS	EAS	222	1618	90	14	34	0.153153
HG00479	CHS	EAS	219	1618	91	13	45	0.205479
HG00473	CHS	EAS	219	1623	86	12	35	0.159817
HG00613	CHS	EAS	223	1607	95	15	42	0.188341
HG00625	CHS	EAS	225	1595	104	14	37	0.164444
HG00653	CHS	EAS	214	1622	87	15	46	0.214953
HG00513	CHS	EAS	234	1604	81	17	50	0.213675
HG00531	CHS	EAS	227	1598	93	16	44	0.193833
HG00675	CHS	EAS	225	1603	92	14	50	0.222222
HG00701	CHS	EAS	204	1627	89	14	43	0.210784
HG00407	CHS	EAS	226	1596	93	16	47	0.207965
HG00699	CHS	EAS	209	1620	85	16	41	0.196172
HG00598	CHS	EAS	230	1596	90	12	47	0.204348
HG00650	CHS	EAS	216	1610	88	13	47	0.217593
HG00607	CHS	EAS	216	1606	87	17	44	0.203704
HG00708	CHS	EAS	215	1610	88	12	47	0.218605
HG00566	CHS	EAS	246	1585	83	10	46	0.186992
HG00717	CHS	EAS	208	1607	95	14	37	0.177885
HG00614	CHS	EAS	215	1606	86	16	41	0.190698
HG00458	CHS	EAS	218	1587	102	15	46	0.211009
HG00580	CHS	EAS	210	1609	89	14	40	0.190476
HG00657	CHS	EAS	207	1615	86	14	39	0.188406
HG00684	CHS	EAS	214	1604	87	16	43	0.200935
HG00671	CHS	EAS	216	1600	92	12	42	0.194444
HG00457	CHS	EAS	216	1606	81	16	44	0.203704
HG00590	CHS	EAS	215	1607	82	13	45	0.209302
HG00707	CHS	EAS	220	1596	88	13	44	0.2
HG00534	CHS	EAS	231	1586	82	14	44	0.190476
HG00595	CHS	EAS	212	1608	79	13	46	0.216981
HG00620	CHS	EAS	213	1595	92	11	49	0.230047
HG00409	CHS	EAS	215	1592	89	14	38	0.176744
HG00690	CHS	EAS	243	1571	79	15	43	0.176955
HG00622	CHS	EAS	220	1589	87	11	34	0.154545
HG00654	CHS	EAS	227	1570	94	14	45	0.198238
HG00628	CHS	EAS	218	1577	96	13	48	0.220183
HG00422	CHS	EAS	217	1588	80	17	40	0.184332
HG00472	CHS	EAS	220	1585	82	15	49	0.222727
HG00476	CHS	EAS	227	1570	91	13	49	0.215859
HG00560	CHS	EAS	220	1588	81	11	40	0.181818
HG00565	CHS	EAS	216	1596	74	12	39	0.180556
HG00533	CHS	EAS	227	1569	84	17	49	0.215859
HG00404	CHS	EAS	229	1561	92	13	44	0.19214
HG00530	CHS	EAS	206	1588	83	14	46	0.223301
HG00663	CHS	EAS	205	1587	87	12	41	0.2
HG00451	CHS	EAS	200	1599	77	14	39	0.195
HG00584	CHS	EAS	233	1558	87	12	37	0.158798
HG00593	CHS	EAS	206	1590	84	10	40	0.194175
HG00475	CHS	EAS	209	1589	79	12	39	0.186603
HG00406	CHS	EAS	222	1563	90	13	41	0.184685
HG00557	CHS	EAS	207	1572	94	14	42	0.202899
HG00599	CHS	EAS	214	1569	87	16	44	0.205607
HG00656	CHS	EAS	228	1542	96	20	37	0.162281
HG00728	CHS	EAS	211	1571	89	15	40	0.189573
HG00452	CHS	EAS	208	1579	83	15	47	0.225962
HG00589	CHS	EAS	211	1568	92	13	42	0.199052
HG00626	CHS	EAS	197	1585	86	15	40	0.203046
HG00632	CHS	EAS	207	1569	90	16	43	0.207729
HG00464	CHS	EAS	238	1539	92	11	54	0.226891
HG00542	CHS	EAS	218	1563	87	11	42	0.192661
HG00421	CHS	EAS	228	1541	92	16	48	0.210526
HG00445	CHS	EAS	200	1578	86	11	39	0.195
HG00478	CHS	EAS	225	1547	87	14	38	0.168889
HG00583	CHS	EAS	218	1546	94	15	38	0.174312
HG00524	CHS	EAS	221	1554	82	15	48	0.217195
HG00619	CHS	EAS	219	1557	80	13	41	0.187215
HG00537	CHS	EAS	217	1552	80	19	39	0.179724
HG00631	CHS	EAS	211	1559	86	12	40	0.189573
HG00610	CHS	EAS	214	1561	79	12	47	0.219626
HG00446	CHS	EAS	226	1524	100	15	41	0.181416
HG00449	CHS	EAS	203	1565	84	13	33	0.162562
HG00683	CHS	EAS	227	1532	88	17	42	0.185022
HG00419	CHS	EAS	211	1545	94	12	38	0.180095
HG00592	CHS	EAS	225	1542	79	16	44	0.195556
HG00525	CHS	EAS	209	1543	94	14	44	0.210526
HG00436	CHS	EAS	210	1544	92	12	37	0.17619
HG00634	CHS	EAS	211	1536	93	17	44	0.208531
HG00536	CHS	EAS	224	1545	77	10	45	0.200893
HG00705	CHS	EAS	217	1522	94	16	38	0.175115
HG00692	CHS	EAS	205	1547	81	14	46	0.22439
HG00463	CHS	EAS	208	1548	81	9	44	0.211538
HG00556	CHS	EAS	209	1533	88	12	39	0.186603
HG00403	CHS	EAS	209	1519	83	13	46	0.220096
HG00581	CHS	EAS	210	1509	83	14	40	0.190476
NA18595	CHB	EAS	227	1687	95	14	48	0.211454
NA18543	CHB	EAS	228	1670	87	15	43	0.188596
NA18747	CHB	EAS	235	1651	95	12	47	0.2
NA18547	CHB	EAS	223	1659	93	17	44	0.197309
NA18565	CHB	EAS	227	1652	94	16	47	0.207048
NA18564	CHB	EAS	232	1645	86	14	43	0.185345
NA18528	CHB	EAS	246	1631	86	12	49	0.199187
NA18550	CHB	EAS	217	1649	97	12	39	0.179724
NA18633	CHB	EAS	211	1647	96	16	36	0.170616
NA18541	CHB	EAS	240	1630	82	17	50	0.208333
NA18630	CHB	EAS	227	1631	95	15	45	0.198238
NA18538	CHB	EAS	219	1652	79	15	40	0.182648
NA18535	CHB	EAS	231	1624	92	16	49	0.212121
NA18636	CHB	EAS	212	1647	84	15	41	0.193396
NA18638	CHB	EAS	226	1623	90	15	44	0.19469
NA18748	CHB	EAS	226	1626	86	14	46	0.20354
NA18626	CHB	EAS	221	1616	98	15	52	0.235294
NA18531	CHB	EAS	227	1631	79	11	40	0.176211
NA18647	CHB	EAS	223	1609	92	19	47	0.210762
NA18533	CHB	EAS	215	1632	79	16	35	0.162791
NA18749	CHB	EAS	224	1614	88	14	39	0.174107
NA18593	CHB	EAS	228	1598	94	18	43	0.188596
NA18579	CHB	EAS	240	1598	81	18	52	0.216667
NA18610	CHB	EAS	234	1597	93	12	52	0.222222
NA18644	CHB	EAS	230	1599	95	12	43	0.186957
NA18582	CHB	EAS	217	1613	89	16	48	0.221198
NA18618	CHB	EAS	234	1591	100	10	44	0.188034
NA18539	CHB	EAS	214	1613	91	15	44	0.205607
NA18624	CHB	EAS	245	1589	84	14	51	0.208163
NA18570	CHB	EAS	226	1609	82	14	41	0.181416
NA18625	CHB	EAS	234	1590	87	17	41	0.175214
NA18622	CHB	EAS	222	1604	89	9	47	0.211712
NA18642	CHB	EAS	236	1579	94	13	46	0.194915
NA18591	CHB	EAS	212	1621	76	12	39	0.183962
NA18525	CHB	EAS	219	1599	90	12	38	0.173516
NA18599	CHB	EAS	232	1581	94	12	41	0.176724
NA18623	CHB	EAS	228	1589	88	14	48	0.210526
NA18640	CHB	EAS	227	1587	87	17	46	0.202643
NA18552	CHB	EAS	213	1605	85	14	49	0.230047
NA18526	CHB	EAS	207	1613	82	13	47	0.227053
NA18635	CHB	EAS	219	1585	96	14	41	0.187215
NA18614	CHB	EAS	229	1582	86	14	42	0.183406
NA18560	CHB	EAS	194	1616	84	16	40	0.206186
NA18574	CHB	EAS	214	1593	92	11	41	0.191589
NA18546	CHB	EAS	241	1557	89	18	47	0.195021
NA18757	CHB	EAS	224	1589	75	17	42	0.1875
NA18545	CHB	EAS	223	1578	85	16	39	0.174888
NA18555	CHB	EAS	221	1577	88	16	48	0.217195
NA18567	CHB	EAS	206	1597	83	15	41	0.199029
NA18561	CHB	EAS	227	1575	84	14	42	0.185022
NA18572	CHB	EAS	211	1588	89	11	45	0.21327
NA18602	CHB	EAS	215	1593	78	13	49	0.227907
NA18643	CHB	EAS	221	1575	87	16	45	0.20362
NA18553	CHB	EAS	217	1585	82	14	39	0.179724
NA18641	CHB	EAS	221	1581	80	16	43	0.19457
NA18542	CHB	EAS	214	1573	96	14	41	0.191589
NA18562	CHB	EAS	221	1565	99	12	44	0.199095
NA18609	CHB	EAS	232	1577	71	17	51	0.219828
NA18631	CHB	EAS	216	1573	88	16	42	0.194444
NA18603	CHB	EAS	206	1584	88	14	43	0.208738
NA18621	CHB	EAS	203	1593	83	12	41	0.20197
NA18637	CHB	EAS	210	1584	84	13	42	0.2
NA18597	CHB	EAS	220	1564	90	15	47	0.213636
NA18559	CHB	EAS	215	1574	86	12	41	0.190698
NA18563	CHB	EAS	222	1564	87	14	44	0.198198
NA18537	CHB	EAS	203	1572	96	13	34	0.167488
NA18573	CHB	EAS	214	1576	80	14	40	0.186916
NA18577	CHB	EAS	221	1570	78	15	41	0.18552
NA18617	CHB	EAS	214	1571	84	15	39	0.182243
NA18645	CHB	EAS	219	1568	81	16	45	0.205479
NA18605	CHB	EAS	227	1555	87	12	44	0.193833
NA18613	CHB	EAS	218	1565	82	16	39	0.178899
NA18608	CHB	EAS	213	1567	88	11	46	0.215962
NA18620	CHB	EAS	214	1557	95	13	40	0.186916
NA18606	CHB	EAS	223	1554	86	14	34	0.152466
NA18632	CHB	EAS	203	1563	94	16	41	0.20197
NA18534	CHB	EAS	226	1532	100	17	39	0.172566
NA18558	CHB	EAS	222	1553	89	11	46	0.207207
NA18629	CHB	EAS	210	1569	82	14	44	0.209524
NA18571	CHB	EAS	215	1563	84	12	44	0.204651
NA18639	CHB	EAS	220	1556	84	13	40	0.181818
NA18532	CHB	EAS	222	1561	76	13	41	0.184685
NA18615	CHB	EAS	208	1557	89	16	45	0.216346
NA18619	CHB	EAS	224	1537	91	17	44	0.196429
NA18628	CHB	EAS	215	1548	93	13	43	0.2
NA18648	CHB	EAS	218	1553	81	17	37	0.169725
NA18536	CHB	EAS	223	1551	80	14	40	0.179372
NA18634	CHB	EAS	209	1557	89	13	33	0.157895
NA18612	CHB	EAS	209	1563	80	14	37	0.177033
NA18740	CHB	EAS	226	1538	90	12	49	0.216814
NA18557	CHB	EAS	215	1544	86	12	41	0.190698
NA18646	CHB	EAS	205	1552	84	14	43	0.209756
NA18544	CHB	EAS	219	1532	91	12	38	0.173516
NA18566	CHB	EAS	208	1547	82	14	37	0.177885
NA18592	CHB	EAS	215	1532	87	17	41	0.190698
NA18627	CHB	EAS	217	1523	99	12	39	0.179724
NA18611	CHB	EAS	220	1538	80	11	42	0.190909
NA18616	CHB	EAS	202	1543	93	11	37	0.183168
NA18530	CHB	EAS	214	1532	83	15	49	0.228972
NA18596	CHB	EAS	205	1546	79	12	38	0.185366
NA18548	CHB	EAS	223	1507	93	16	50	0.224215
NA18549	CHB	EAS	215	1522	90	11	33	0.153488
NA18745	CHB	EAS	203	1529	82	11	40	0.197044
HG01795	CDX	EAS	224	1689	86	15	44	0.196429
HG02409	CDX	EAS	225	1663	91	13	42	0.186667
HG02373	CDX	EAS	224	1647	94	17	42	0.1875
HG02188	CDX	EAS	235	1636	91	15	43	0.182979
HG01798	CDX	EAS	234	1630	94	13	42	0.179487
HG01028	CDX	EAS	224	1621	101	13	44	0.196429
HG02397	CDX	EAS	202	1651	92	13	40	0.19802
HG02374	CDX	EAS	236	1631	75	15	50	0.211864
HG02399	CDX	EAS	217	1624	96	14	40	0.184332
HG02396	CDX	EAS	227	1620	90	12	37	0.162996
HG02367	CDX	EAS	219	1612	99	18	50	0.228311
HG02165	CDX	EAS	217	1628	91	11	46	0.211982
HG01029	CDX	EAS	218	1606	95	16	44	0.201835
HG02406	CDX	EAS	237	1593	89	15	43	0.181435
HG02152	CDX	EAS	244	1592	79	16	48	0.196721
HG01801	CDX	EAS	219	1616	83	12	45	0.205479
HG01813	CDX	EAS	207	1619	89	15	35	0.169082
HG02181	CDX	EAS	207	1621	87	15	40	0.193237
HG02190	CDX	EAS	231	1598	86	14	43	0.186147
HG02186	CDX	EAS	212	1614	89	13	48	0.226415
HG00978	CDX	EAS	227	1587	95	18	45	0.198238
HG02382	CDX	EAS	200	1622	84	20	40	0.2
HG02153	CDX	EAS	225	1597	85	15	42	0.186667
HG02154	CDX	EAS	212	1612	84	14	44	0.207547
HG02356	CDX	EAS	212	1607	89	14	42	0.198113
HG02179	CDX	EAS	209	1608	92	11	37	0.177033
HG01805	CDX	EAS	219	1600	83	17	38	0.173516
HG02156	CDX	EAS	217	1596	92	14	37	0.170507
HG02178	CDX	EAS	225	1598	80	15	47	0.208889
HG02380	CDX	EAS	218	1600	87	13	37	0.169725
HG02371	CDX	EAS	226	1587	89	15	46	0.20354
HG02155	CDX	EAS	211	1607	82	15	39	0.184834
HG02364	CDX	EAS	233	1588	79	15	44	0.188841
HG02401	CDX	EAS	228	1584	87	16	38	0.166667
HG01817	CDX	EAS	219	1582	97	16	41	0.187215
HG01807	CDX	EAS	218	1599	81	15	46	0.211009
HG02389	CDX	EAS	213	1603	81	16	42	0.197183
HG00867	CDX	EAS	219	1599	78	15	51	0.232877
HG02180	CDX	EAS	225	1582	92	12	42	0.186667
HG02383	CDX	EAS	213	1599	86	12	43	0.201878
HG00851	CDX	EAS	232	1575	87	13	46	0.198276
HG01804	CDX	EAS	207	1600	84	15	42	0.202899
HG00881	CDX	EAS	220	1592	80	13	39	0.177273
HG02390	CDX	EAS	207	1589	96	13	48	0.231884
HG01031	CDX	EAS	226	1581	83	14	38	0.168142
HG01794	CDX	EAS	228	1569	88	18	48	0.210526
HG00864	CDX	EAS	215	1574	96	16	44	0.204651
HG01796	CDX	EAS	215	1578	96	12	38	0.176744
HG01809	CDX	EAS	225	1575	87	14	44	0.195556
HG02151	CDX	EAS	213	1578	93	17	38	0.178404
HG00879	CDX	EAS	214	1577	93	15	43	0.200935
HG02408	CDX	EAS	207	1589	88	15	37	0.178744
HG02407	CDX	EAS	215	1583	86	14	41	0.190698
HG01799	CDX	EAS	228	1571	84	14	48	0.210526
HG01806	CDX	EAS	219	1561	103	13	40	0.182648
HG02395	CDX	EAS	221	1572	84	18	37	0.167421
HG02398	CDX	EAS	224	1566	92	13	44	0.196429
HG00982	CDX	EAS	213	1581	83	16	47	0.220657
HG02184	CDX	EAS	213	1589	79	12	41	0.192488
HG02385	CDX	EAS	240	1563	78	12	38	0.158333
HG01797	CDX	EAS	207	1579	87	16	36	0.173913
HG02355	CDX	EAS	212	1578	87	10	38	0.179245
HG00844	CDX	EAS	221	1570	79	16	53	0.239819
HG00766	CDX	EAS	224	1559	84	17	44	0.196429
HG01812	CDX	EAS	210	1572	86	16	49	0.233333
HG01815	CDX	EAS	215	1572	83	14	39	0.181395
HG02182	CDX	EAS	212	1567	89	16	35	0.165094
HG02185	CDX	EAS	218	1562	86	13	38	0.174312
HG01808	CDX	EAS	229	1554	79	16	48	0.209607
HG01810	CDX	EAS	211	1558	95	12	33	0.156398
HG02351	CDX	EAS	210	1560	90	16	35	0.166667
HG02379	CDX	EAS	222	1556	85	12	46	0.207207
HG02402	CDX	EAS	220	1550	89	13	49	0.222727
HG02391	CDX	EAS	222	1547	89	11	50	0.225225
HG02394	CDX	EAS	214	1548	94	13	37	0.172897
HG02410	CDX	EAS	202	1558	93	16	39	0.193069
HG02164	CDX	EAS	220	1553	81	14	44	0.2
HG02166	CDX	EAS	208	1557	85	15	40	0.192308
HG01816	CDX	EAS	206	1551	87	17	41	0.199029
HG01802	CDX	EAS	198	1563	87	12	34	0.171717
HG02384	CDX	EAS	222	1531	92	14	51	0.22973
HG02386	CDX	EAS	227	1534	83	14	46	0.202643
HG02375	CDX	EAS	217	1540	85	14	46	0.211982
HG00759	CDX	EAS	210	1552	80	13	35	0.166667
HG02187	CDX	EAS	199	1563	80	13	35	0.175879
HG02250	CDX	EAS	201	1548	93	12	34	0.169154
HG01811	CDX	EAS	208	1541	89	12	43	0.206731
HG02353	CDX	EAS	207	1532	93	14	42	0.202899
HG02360	CDX	EAS	221	1533	77	13	46	0.208145
HG00956	CDX	EAS	210	1532	87	14	39	0.185714
HG01800	CDX	EAS	208	1539	80	12	36	0.173077
HG01046	CDX	EAS	208	1514	87	15	41	0.197115
HG02392	CDX	EAS	205	1511	89	12	44	0.214634
NA18972	JPT	EAS	244	1629	96	16	52	0.213115
NA18961	JPT	EAS	245	1626	82	21	51	0.208163
NA18985	JPT	EAS	232	1630	90	16	41	0.176724
NA18963	JPT	EAS	229	1628	90	14	41	0.179039
NA18997	JPT	EAS	229	1620	92	14	51	0.222707
NA18971	JPT	EAS	229	1627	83	12	43	0.187773
NA18974	JPT	EAS	212	1632	93	13	44	0.207547
NA19082	JPT	EAS	222	1620	94	14	38	0.171171
NA19063	JPT	EAS	231	1611	93	14	39	0.168831
NA19079	JPT	EAS	218	1626	89	16	42	0.192661
NA18987	JPT	EAS	234	1614	83	16	48	0.205128
NA19010	JPT	EAS	228	1602	96	19	49	0.214912
NA19006	JPT	EAS	215	1631	83	15	47	0.218605
NA19075	JPT	EAS	220	1633	76	15	45	0.204545
NA18946	JPT	EAS	223	1609	96	15	42	0.188341
NA18968	JPT	EAS	217	1618	89	14	46	0.211982
NA19090	JPT	EAS	220	1615	86	17	47	0.213636
NA19076	JPT	EAS	222	1616	84	15	42	0.189189
NA19078	JPT	EAS	226	1602	93	14	45	0.199115
NA18986	JPT	EAS	233	1601	85	14	44	0.188841
NA18988	JPT	EAS	226	1604	87	13	40	0.176991
NA18991	JPT	EAS	235	1595	87	13	52	0.221277
NA18980	JPT	EAS	237	1592	84	16	47	0.198312
NA19001	JPT	EAS	221	1603	91	13	44	0.199095
NA18969	JPT	EAS	220	1606	83	18	46	0.209091
NA19009	JPT	EAS	215	1616	80	16	39	0.181395
NA18965	JPT	EAS	230	1601	80	14	45	0.195652
NA18950	JPT	EAS	230	1596	82	16	44	0.191304
NA18999	JPT	EAS	237	1589	80	18	39	0.164557
NA19087	JPT	EAS	232	1602	78	12	42	0.181034
NA18957	JPT	EAS	226	1600	81	13	45	0.199115
NA18983	JPT	EAS	206	1616	84	13	42	0.203883
NA18951	JPT	EAS	225	1586	93	14	45	0.2
NA18964	JPT	EAS	215	1609	82	12	44	0.204651
NA19062	JPT	EAS	221	1595	83	19	44	0.199095
NA19003	JPT	EAS	211	1593	96	16	33	0.156398
NA18952	JPT	EAS	216	1591	96	12	45	0.208333
NA18960	JPT	EAS	205	1597	93	17	44	0.214634
NA18948	JPT	EAS	219	1590	87	15	41	0.187215
NA18962	JPT	EAS	221	1584	95	11	43	0.19457
NA18990	JPT	EAS	206	1592	97	14	38	0.184466
NA19068	JPT	EAS	224	1584	88	13	51	0.227679
NA19074	JPT	EAS	210	1596	85	18	45	0.214286
NA19089	JPT	EAS	230	1574	90	15	41	0.178261
NA18940	JPT	EAS	215	1592	86	15	42	0.195349
NA18966	JPT	EAS	227	1572	93	16	46	0.202643
NA19059	JPT	EAS	209	1589	96	14	42	0.200957
NA19084	JPT	EAS	230	1575	87	15	46	0.2
NA19056	JPT	EAS	219	1583	91	13	41	0.187215
NA19081	JPT	EAS	212	1589	88	17	46	0.216981
NA18956	JPT	EAS	223	1580	84	17	46	0.206278
NA18953	JPT	EAS	237	1560	89	17	54	0.227848
NA18979	JPT	EAS	210	1592	88	13	37	0.17619
NA18959	JPT	EAS	213	1588	88	13	42	0.197183
NA18998	JPT	EAS	217	1578	91	15	42	0.193548
NA19067	JPT	EAS	220	1584	82	15	43	0.195455
NA18976	JPT	EAS	216	1579	91	14	39	0.180556
NA19055	JPT	EAS	214	1572	97	17	39	0.182243
NA19088	JPT	EAS	216	1588	82	14	36	0.166667
NA18995	JPT	EAS	233	1566	87	13	48	0.206009
NA18993	JPT	EAS	204	1588	91	14	44	0.215686
NA18973	JPT	EAS	228	1565	87	16	52	0.22807
NA18942	JPT	EAS	239	1553	88	15	47	0.196653
NA19058	JPT	EAS	208	1589	87	11	35	0.168269
NA19077	JPT	EAS	201	1584	93	17	42	0.208955
NA19011	JPT	EAS	206	1578	96	14	48	0.23301
NA19086	JPT	EAS	228	1581	72	11	47	0.20614
NA18975	JPT	EAS	214	1580	84	13	47	0.219626
NA18994	JPT	EAS	213	1581	85	11	37	0.173709
NA18989	JPT	EAS	213	1582	80	14	45	0.211268
NA18981	JPT	EAS	207	1576	90	15	38	0.183575
NA18947	JPT	EAS	232	1554	87	13	51	0.219828
NA18992	JPT	EAS	215	1571	85	15	40	0.186047
NA19064	JPT	EAS	224	1559	88	15	39	0.174107
NA19054	JPT	EAS	221	1569	81	14	49	0.221719
NA18954	JPT	EAS	213	1559	96	15	44	0.206573
NA19072	JPT	EAS	191	1588	89	15	36	0.188482
NA18945	JPT	EAS	222	1568	80	12	41	0.184685
NA19060	JPT	EAS	232	1554	82	10	55	0.237069
NA19080	JPT	EAS	209	1559	95	12	39	0.186603
NA18941	JPT	EAS	219	1554	84	16	49	0.223744
NA18944	JPT	EAS	224	1544	90	15	36	0.160714
NA18970	JPT	EAS	215	1561	77	14	46	0.213953
NA18978	JPT	EAS	221	1545	88	13	46	0.208145
NA19057	JPT	EAS	223	1543	86	15	42	0.188341
NA18982	JPT	EAS	219	1549	83	14	40	0.182648
NA18943	JPT	EAS	219	1550	79	15	47	0.214612
NA18939	JPT	EAS	213	1546	87	12	39	0.183099
NA19012	JPT	EAS	214	1548	80	16	45	0.21028
NA19085	JPT	EAS	214	1530	95	14	41	0.191589
NA18967	JPT	EAS	198	1547	91	16	39	0.19697
NA19002	JPT	EAS	204	1541	96	9	42	0.205882
NA18977	JPT	EAS	226	1520	88	14	47	0.207965
NA19007	JPT	EAS	212	1528	90	16	43	0.20283
NA19000	JPT	EAS	221	1519	86	14	47	0.21267
NA19070	JPT	EAS	215	1513	95	15	48	0.223256
NA19083	JPT	EAS	215	1521	91	11	49	0.227907
NA18949	JPT	EAS	227	1518	76	13	48	0.211454
NA19066	JPT	EAS	211	1522	86	13	45	0.21327
NA19004	JPT	EAS	214	1523	82	12	42	0.196262
NA19091	JPT	EAS	214	1523	74	14	50	0.233645
NA19005	JPT	EAS	209	1510	88	12	41	0.196172
NA18984	JPT	EAS	209	1509	86	14	44	0.210526
NA19065	JPT	EAS	210	1508	79	17	44	0.209524
HG01704	IBS	EUR	217	1673	88	13	43	0.198157
HG01786	IBS	EUR	210	1678	85	14	32	0.152381
HG02239	IBS	EUR	243	1626	83	15	50	0.205761
HG02233	IBS	EUR	213	1652	85	14	39	0.183099
HG01501	IBS	EUR	232	1625	89	11	46	0.198276
HG02220	IBS	EUR	223	1625	86	19	48	0.215247
HG02235	IBS	EUR	227	1618	88	11	41	0.180617
HG01777	IBS	EUR	205	1647	69	17	49	0.239024
HG02224	IBS	EUR	202	1624	91	19	40	0.19802
HG01615	IBS	EUR	220	1611	84	12	41	0.186364
HG02232	IBS	EUR	218	1603	92	11	46	0.211009
HG01625	IBS	EUR	226	1583	98	16	48	0.212389
HG02230	IBS	EUR	227	1592	88	16	48	0.211454
HG01527	IBS	EUR	210	1612	85	15	42	0.2
HG01697	IBS	EUR	218	1611	80	13	39	0.178899
HG01602	IBS	EUR	204	1617	85	15	45	0.220588
HG01705	IBS	EUR	219	1611	78	12	43	0.196347
HG01785	IBS	EUR	219	1594	90	17	50	0.228311
HG01612	IBS	EUR	216	1603	86	13	43	0.199074
HG02238	IBS	EUR	224	1598	82	13	46	0.205357
HG01781	IBS	EUR	238	1571	91	16	43	0.180672
HG01708	IBS	EUR	213	1610	79	12	44	0.206573
HG02231	IBS	EUR	214	1598	88	14	41	0.191589
HG01673	IBS	EUR	215	1594	88	13	51	0.237209
HG02223	IBS	EUR	206	1596	92	14	35	0.169903
HG01516	IBS	EUR	218	1588	87	14	56	0.256881
HG02236	IBS	EUR	186	1621	89	11	40	0.215054
HG01510	IBS	EUR	215	1601	75	12	40	0.186047
HG01770	IBS	EUR	211	1600	81	11	45	0.21327
HG01779	IBS	EUR	212	1599	80	12	41	0.193396
HG01710	IBS	EUR	213	1580	95	14	43	0.201878
HG01518	IBS	EUR	200	1615	74	12	44	0.22
HG01519	IBS	EUR	210	1591	89	11	40	0.190476
HG02219	IBS	EUR	220	1575	87	16	44	0.2
HG02221	IBS	EUR	229	1573	82	14	50	0.218341
HG01761	IBS	EUR	200	1591	95	11	38	0.19
HG01766	IBS	EUR	214	1581	85	16	52	0.242991
HG01757	IBS	EUR	207	1576	98	14	38	0.183575
HG01776	IBS	EUR	223	1577	81	14	49	0.219731
HG01525	IBS	EUR	209	1587	87	11	48	0.229665
HG01630	IBS	EUR	203	1595	79	15	43	0.211823
HG01676	IBS	EUR	212	1587	77	16	42	0.198113
HG01607	IBS	EUR	216	1572	89	13	46	0.212963
HG01605	IBS	EUR	200	1588	86	15	39	0.195
HG01631	IBS	EUR	212	1580	81	16	38	0.179245
HG01668	IBS	EUR	226	1567	80	16	53	0.234513
HG01504	IBS	EUR	209	1584	78	17	46	0.220096
HG01507	IBS	EUR	213	1574	88	13	38	0.178404
HG01512	IBS	EUR	192	1598	83	11	44	0.229167
HG01608	IBS	EUR	219	1563	88	12	44	0.200913
HG01773	IBS	EUR	202	1582	85	13	39	0.193069
HG01613	IBS	EUR	213	1581	74	12	34	0.159624
HG01624	IBS	EUR	225	1560	80	15	51	0.226667
HG01707	IBS	EUR	218	1560	90	12	46	0.211009
HG01675	IBS	EUR	216	1568	79	16	47	0.217593
HG01685	IBS	EUR	220	1567	78	13	37	0.168182
HG01686	IBS	EUR	214	1577	74	12	47	0.219626
HG01699	IBS	EUR	224	1554	89	10	51	0.227679
HG01756	IBS	EUR	213	1570	79	15	36	0.169014
HG01669	IBS	EUR	210	1568	84	13	41	0.195238
HG01695	IBS	EUR	207	1572	83	13	43	0.207729
HG01500	IBS	EUR	207	1572	81	14	35	0.169082
HG01509	IBS	EUR	195	1573	89	17	38	0.194872
HG01619	IBS	EUR	214	1563	85	12	43	0.200935
HG01672	IBS	EUR	209	1574	76	15	44	0.210526
HG01678	IBS	EUR	216	1558	83	17	48	0.222222
HG01670	IBS	EUR	199	1591	71	12	41	0.20603
HG01684	IBS	EUR	208	1567	81	16	43	0.206731
HG01680	IBS	EUR	215	1551	87	18	44	0.204651
HG01762	IBS	EUR	206	1571	80	13	38	0.184466
HG01768	IBS	EUR	198	1572	90	10	44	0.222222
HG01709	IBS	EUR	218	1549	85	17	45	0.206422
HG01603	IBS	EUR	220	1544	90	12	42	0.190909
HG01521	IBS	EUR	205	1562	84	14	45	0.219512
HG01531	IBS	EUR	229	1548	77	10	49	0.213974
HG01765	IBS	EUR	204	1559	87	13	38	0.186275
HG01628	IBS	EUR	219	1550	74	18	41	0.187215
HG01503	IBS	EUR	209	1549	90	11	42	0.200957
HG01536	IBS	EUR	224	1534	84	14	49	0.21875
HG01626	IBS	EUR	210	1537	96	13	44	0.209524
HG01767	IBS	EUR	210	1545	88	13	53	0.252381
HG01513	IBS	EUR	199	1572	74	10	45	0.226131
HG01530	IBS	EUR	194	1565	80	16	37	0.190722
HG01702	IBS	EUR	222	1530	89	14	51	0.22973
HG01783	IBS	EUR	212	1544	83	14	46	0.216981
HG01620	IBS	EUR	213	1542	85	12	48	0.225352
HG01528	IBS	EUR	203	1550	83	14	48	0.236453
HG01617	IBS	EUR	196	1562	83	8	43	0.219388
HG01618	IBS	EUR	223	1527	82	16	39	0.174888
HG01515	IBS	EUR	207	1551	74	14	49	0.236715
HG01679	IBS	EUR	224	1529	80	12	44	0.196429
HG01775	IBS	EUR	215	1534	77	15	45	0.209302
HG01606	IBS	EUR	214	1529	85	11	39	0.182243
HG01682	IBS	EUR	218	1516	91	13	38	0.174312
HG01771	IBS	EUR	210	1523	87	17	45	0.214286
HG01522	IBS	EUR	213	1527	78	16	47	0.220657
HG01747	IBS	EUR	206	1540	75	13	36	0.174757
HG01524	IBS	EUR	200	1541	78	11	42	0.21
HG01632	IBS	EUR	219	1507	87	17	53	0.242009
HG01694	IBS	EUR	212	1510	95	13	45	0.212264
HG01623	IBS	EUR	195	1538	83	12	44	0.225641
HG01700	IBS	EUR	216	1511	86	14	48	0.222222
HG01746	IBS	EUR	203	1525	88	11	41	0.20197
HG01784	IBS	EUR	199	1530	86	9	40	0.201005
HG01537	IBS	EUR	213	1514	75	16	46	0.215962
HG01610	IBS	EUR	214	1509	84	11	40	0.186916
HG01506	IBS	EUR	201	1523	72	14	39	0.19403
NA20783	TSI	EUR	221	1634	87	15	44	0.199095
NA20752	TSI	EUR	212	1647	82	12	37	0.174528
NA20815	TSI	EUR	198	1654	86	12	42	0.212121
NA20762	TSI	EUR	217	1633	82	15	46	0.211982
NA20822	TSI	EUR	200	1640	89	14	37	0.185
NA20515	TSI	EUR	202	1632	86	13	45	0.222772
NA20786	TSI	EUR	201	1633	84	14	40	0.199005
NA20827	TSI	EUR	203	1627	87	15	44	0.216749
NA20759	TSI	EUR	237	1606	74	14	47	0.198312
NA20753	TSI	EUR	213	1627	74	14	46	0.215962
NA20771	TSI	EUR	199	1624	94	11	29	0.145729
NA20755	TSI	EUR	199	1622	85	16	40	0.201005
NA20775	TSI	EUR	213	1615	82	12	47	0.220657
NA20763	TSI	EUR	211	1609	85	14	34	0.161137
NA20503	TSI	EUR	245	1577	85	11	50	0.204082
NA20521	TSI	EUR	224	1597	76	18	47	0.209821
NA20582	TSI	EUR	222	1589	89	15	49	0.220721
NA20509	TSI	EUR	225	1583	88	14	45	0.2
NA20801	TSI	EUR	203	1612	78	16	48	0.236453
NA20826	TSI	EUR	207	1597	92	12	39	0.188406
NA20761	TSI	EUR	217	1599	77	13	43	0.198157
NA20787	TSI	EUR	214	1593	84	14	42	0.196262
NA20808	TSI	EUR	217	1583	89	12	45	0.207373
NA20806	TSI	EUR	201	1612	77	10	39	0.19403
NA20785	TSI	EUR	207	1583	92	14	49	0.236715
NA20819	TSI	EUR	227	1583	75	10	42	0.185022
NA20520	TSI	EUR	198	1599	86	11	32	0.161616
NA20522	TSI	EUR	220	1579	79	15	48	0.218182
NA20581	TSI	EUR	204	1571	103	12	38	0.186275
NA20588	TSI	EUR	228	1563	85	13	43	0.188596
NA20517	TSI	EUR	228	1578	71	11	47	0.20614
NA20795	TSI	EUR	206	1571	94	17	41	0.199029
NA20534	TSI	EUR	211	1573	84	19	39	0.184834
NA20754	TSI	EUR	212	1580	83	12	37	0.174528
NA20516	TSI	EUR	203	1588	83	12	34	0.167488
NA20524	TSI	EUR	217	1569	86	14	43	0.198157
NA20533	TSI	EUR	208	1578	86	13	44	0.211538
NA20772	TSI	EUR	216	1576	79	13	52	0.240741
NA20774	TSI	EUR	221	1566	87	10	43	0.19457
NA20828	TSI	EUR	219	1572	77	16	43	0.196347
NA20507	TSI	EUR	208	1577	85	13	50	0.240385
NA20540	TSI	EUR	204	1586	82	11	42	0.205882
NA20811	TSI	EUR	208	1579	84	12	49	0.235577
NA20519	TSI	EUR	224	1556	87	15	40	0.178571
NA20760	TSI	EUR	206	1571	90	14	42	0.203883
NA20768	TSI	EUR	209	1568	87	17	41	0.196172
NA20821	TSI	EUR	201	1591	77	12	33	0.164179
NA20532	TSI	EUR	223	1560	81	16	46	0.206278
NA20770	TSI	EUR	220	1568	78	14	46	0.209091
NA20796	TSI	EUR	206	1581	81	12	40	0.194175
NA20803	TSI	EUR	222	1546	96	15	44	0.198198
NA20757	TSI	EUR	200	1569	89	15	43	0.215
NA20506	TSI	EUR	214	1561	83	12	44	0.205607
NA20514	TSI	EUR	217	1554	84	13	46	0.211982
NA20538	TSI	EUR	210	1562	83	12	42	0.2
NA20804	TSI	EUR	208	1561	81	16	43	0.206731
NA20832	TSI	EUR	236	1541	77	12	49	0.207627
NA20529	TSI	EUR	211	1552	90	12	42	0.199052
NA20790	TSI	EUR	202	1559	88	16	44	0.217822
NA20809	TSI	EUR	213	1558	79	15	45	0.211268
NA20767	TSI	EUR	216	1558	77	13	37	0.171296
NA20541	TSI	EUR	227	1545	80	11	48	0.211454
NA20527	TSI	EUR	212	1549	89	12	49	0.231132
NA20756	TSI	EUR	207	1556	84	15	31	0.149758
NA20518	TSI	EUR	219	1538	87	17	44	0.200913
NA20818	TSI	EUR	204	1555	90	12	34	0.166667
NA20536	TSI	EUR	193	1572	79	16	38	0.196891
NA20508	TSI	EUR	194	1559	91	15	31	0.159794
NA20769	TSI	EUR	199	1565	81	14	39	0.19598
NA20810	TSI	EUR	200	1553	93	13	38	0.19
NA20813	TSI	EUR	221	1542	83	12	42	0.190045
NA20512	TSI	EUR	208	1549	85	15	45	0.216346
NA20802	TSI	EUR	216	1532	95	14	45	0.208333
NA20589	TSI	EUR	210	1549	81	16	41	0.195238
NA20539	TSI	EUR	216	1535	93	11	36	0.166667
NA20792	TSI	EUR	203	1556	81	13	41	0.20197
NA20764	TSI	EUR	204	1545	89	12	44	0.215686
NA20800	TSI	EUR	209	1533	97	11	48	0.229665
NA20502	TSI	EUR	202	1546	88	13	40	0.19802
NA20510	TSI	EUR	189	1561	87	12	34	0.179894
NA20758	TSI	EUR	210	1545	81	13	42	0.2
NA20807	TSI	EUR	223	1528	86	12	50	0.224215
NA20505	TSI	EUR	220	1527	88	13	44	0.2
NA20525	TSI	EUR	198	1562	73	14	39	0.19697
NA20530	TSI	EUR	213	1546	76	12	43	0.201878
NA20773	TSI	EUR	215	1531	86	15	47	0.218605
NA20812	TSI	EUR	200	1553	76	18	40	0.2
NA20511	TSI	EUR	219	1532	83	12	47	0.214612
NA20798	TSI	EUR	215	1534	79	18	39	0.181395
NA20528	TSI	EUR	210	1532	85	15	46	0.219048
NA20587	TSI	EUR	192	1551	86	12	44	0.229167
NA20544	TSI	EUR	224	1524	77	15	44	0.196429
NA20531	TSI	EUR	198	1540	87	14	47	0.237374
NA20814	TSI	EUR	215	1532	82	10	38	0.176744
NA20542	TSI	EUR	209	1523	92	13	37	0.177033
NA20543	TSI	EUR	202	1535	84	15	40	0.19802
NA20797	TSI	EUR	217	1532	76	11	51	0.235023
NA20535	TSI	EUR	205	1528	87	15	39	0.190244
NA20586	TSI	EUR	229	1501	92	13	44	0.19214
NA20799	TSI	EUR	199	1547	76	13	43	0.21608
NA20766	TSI	EUR	202	1542	78	12	45	0.222772
NA20805	TSI	EUR	203	1528	90	12	44	0.216749
NA20513	TSI	EUR	228	1503	77	14	49	0.214912
NA20778	TSI	EUR	205	1521	82	13	41	0.2
NA20765	TSI	EUR	212	1510	84	12	50	0.235849
NA20504	TSI	EUR	189	1526	88	13	36	0.190476
NA20585	TSI	EUR	212	1495	74	12	38	0.179245
NA11933	CEU	EUR	240	1629	94	20	54	0.225
NA12234	CEU	EUR	222	1638	92	14	48	0.216216
NA12348	CEU	EUR	226	1640	84	12	48	0.212389
NA12776	CEU	EUR	220	1635	82	18	45	0.204545
NA12717	CEU	EUR	212	1633	92	15	50	0.235849
NA11932	CEU	EUR	206	1642	84	15	43	0.208738
NA11892	CEU	EUR	221	1620	87	17	51	0.230769
NA12249	CEU	EUR	229	1621	80	13	44	0.19214
NA06994	CEU	EUR	221	1615	83	17	38	0.171946
NA12873	CEU	EUR	213	1622	84	14	44	0.206573
NA12156	CEU	EUR	211	1623	84	13	49	0.232227
NA12751	CEU	EUR	217	1624	78	12	43	0.198157
NA11829	CEU	EUR	229	1610	76	14	45	0.196507
NA12283	CEU	EUR	215	1613	88	12	49	0.227907
NA07000	CEU	EUR	215	1607	93	12	40	0.186047
NA12282	CEU	EUR	223	1606	81	15	46	0.206278
NA12414	CEU	EUR	219	1616	80	8	44	0.200913
NA12829	CEU	EUR	232	1590	88	13	39	0.168103
NA12287	CEU	EUR	194	1616	95	16	39	0.201031
NA12154	CEU	EUR	205	1620	83	12	43	0.209756
NA12813	CEU	EUR	227	1600	79	14	45	0.198238
NA12045	CEU	EUR	233	1587	87	12	48	0.206009
NA12286	CEU	EUR	207	1615	80	16	46	0.222222
NA12546	CEU	EUR	235	1572	92	14	50	0.212766
NA11830	CEU	EUR	195	1604	98	14	33	0.169231
NA12777	CEU	EUR	209	1601	86	15	45	0.215311
NA10847	CEU	EUR	207	1602	87	14	43	0.207729
NA12400	CEU	EUR	224	1584	92	10	32	0.142857
NA12341	CEU	EUR	219	1587	91	12	47	0.214612
NA12004	CEU	EUR	207	1614	75	12	38	0.183575
NA12815	CEU	EUR	210	1599	87	12	42	0.2
NA07056	CEU	EUR	204	1609	79	11	38	0.186275
NA12273	CEU	EUR	221	1584	85	12	47	0.21267
NA06989	CEU	EUR	228	1580	80	13	45	0.197368
NA12778	CEU	EUR	193	1599	91	15	36	0.186528
NA07048	CEU	EUR	219	1583	78	15	50	0.228311
NA12144	CEU	EUR	190	1606	85	14	42	0.221053
NA12872	CEU	EUR	199	1609	76	11	42	0.211055
NA12827	CEU	EUR	211	1597	74	11	39	0.184834
NA12043	CEU	EUR	203	1591	81	15	40	0.197044
NA12775	CEU	EUR	224	1561	88	17	49	0.21875
NA12760	CEU	EUR	209	1586	82	12	45	0.215311
NA12878	CEU	EUR	213	1580	83	12	47	0.220657
NA12155	CEU	EUR	223	1570	82	11	46	0.206278
NA12399	CEU	EUR	208	1594	70	14	43	0.206731
NA12718	CEU	EUR	229	1558	85	14	47	0.20524
NA07037	CEU	EUR	226	1562	82	15	43	0.190265
NA11881	CEU	EUR	220	1559	92	14	41	0.186364
NA06985	CEU	EUR	223	1572	75	14	43	0.192825
NA12044	CEU	EUR	208	1598	69	9	42	0.201923
NA12383	CEU	EUR	218	1570	83	13	45	0.206422
NA12763	CEU	EUR	225	1560	84	14	50	0.222222
NA12830	CEU	EUR	211	1576	84	11	45	0.21327
NA11831	CEU	EUR	194	1595	80	12	32	0.164948
NA12342	CEU	EUR	196	1580	87	17	34	0.173469
NA11840	CEU	EUR	207	1579	80	13	43	0.207729
NA12761	CEU	EUR	209	1567	86	14	43	0.205742
NA11994	CEU	EUR	210	1568	80	17	42	0.2
NA06984	CEU	EUR	211	1571	74	17	43	0.203791
NA12716	CEU	EUR	210	1562	91	10	42	0.2
NA12489	CEU	EUR	227	1553	79	13	46	0.202643
NA12889	CEU	EUR	196	1582	83	11	36	0.183673
NA12005	CEU	EUR	219	1558	79	15	42	0.191781
NA07357	CEU	EUR	199	1566	88	17	41	0.20603
NA12750	CEU	EUR	219	1566	72	13	44	0.200913
NA11931	CEU	EUR	216	1554	86	13	43	0.199074
NA12890	CEU	EUR	217	1546	83	20	44	0.202765
NA11832	CEU	EUR	218	1552	76	14	46	0.211009
NA12814	CEU	EUR	222	1547	74	16	48	0.216216
NA12046	CEU	EUR	232	1528	81	17	43	0.185345
NA12828	CEU	EUR	203	1553	84	17	36	0.17734
NA11919	CEU	EUR	218	1540	83	15	47	0.215596
NA12762	CEU	EUR	221	1539	79	17	45	0.20362
NA11920	CEU	EUR	210	1544	87	14	46	0.219048
NA06986	CEU	EUR	198	1564	78	14	38	0.191919
NA12272	CEU	EUR	210	1557	73	13	39	0.185714
NA12843	CEU	EUR	190	1562	89	12	35	0.184211
NA11918	CEU	EUR	228	1536	74	14	44	0.192982
NA12749	CEU	EUR	190	1567	80	15	35	0.184211
NA11894	CEU	EUR	223	1539	77	12	40	0.179372
NA12812	CEU	EUR	206	1553	79	11	44	0.213592
NA10851	CEU	EUR	200	1550	85	13	37	0.185
NA12347	CEU	EUR	200	1551	85	11	45	0.225
NA11995	CEU	EUR	223	1527	82	14	49	0.219731
NA07347	CEU	EUR	204	1530	92	16	36	0.176471
NA12058	CEU	EUR	240	1502	87	12	53	0.220833
NA11893	CEU	EUR	201	1541	81	17	35	0.174129
NA12003	CEU	EUR	191	1555	77	16	37	0.193717
NA12748	CEU	EUR	219	1514	89	13	42	0.191781
NA12874	CEU	EUR	212	1533	74	14	39	0.183962
NA12006	CEU	EUR	202	1532	83	14	41	0.20297
NA11843	CEU	EUR	207	1527	78	16	38	0.183575
NA11930	CEU	EUR	198	1540	79	11	37	0.186869
NA11992	CEU	EUR	197	1545	76	10	36	0.182741
NA12340	CEU	EUR	202	1531	71	15	34	0.168317
NA12842	CEU	EUR	224	1503	74	14	44	0.196429
NA12275	CEU	EUR	198	1537	67	12	40	0.20202
NA07051	CEU	EUR	198	1507	77	13	39	0.19697
NA12413	CEU	EUR	194	1509	75	14	40	0.206186
HG00233	GBR	EUR	237	1664	87	18	46	0.194093
HG00258	GBR	EUR	223	1672	83	15	48	0.215247
HG00245	GBR	EUR	227	1654	89	16	39	0.171806
HG00128	GBR	EUR	233	1661	76	13	41	0.175966
HG00133	GBR	EUR	212	1659	84	16	44	0.207547
HG00253	GBR	EUR	231	1642	80	14	40	0.17316
HG00120	GBR	EUR	204	1650	83	14	40	0.196078
HG00255	GBR	EUR	208	1639	83	16	47	0.225962
HG00140	GBR	EUR	198	1649	83	14	41	0.207071
HG00110	GBR	EUR	217	1629	84	12	44	0.202765
HG00116	GBR	EUR	215	1615	94	16	40	0.186047
HG00127	GBR	EUR	221	1612	89	17	43	0.19457
HG00243	GBR	EUR	220	1623	75	17	50	0.227273
HG00232	GBR	EUR	234	1603	85	12	51	0.217949
HG00235	GBR	EUR	218	1622	76	15	43	0.197248
HG00146	GBR	EUR	215	1615	85	15	48	0.223256
HG00259	GBR	EUR	219	1612	84	15	41	0.187215
HG00242	GBR	EUR	208	1626	78	15	48	0.230769
HG00256	GBR	EUR	215	1621	77	14	45	0.209302
HG00130	GBR	EUR	228	1595	86	15	51	0.223684
HG01789	GBR	EUR	195	1626	85	14	39	0.2
HG00136	GBR	EUR	230	1590	84	15	47	0.204348
HG01334	GBR	EUR	212	1611	84	12	43	0.20283
HG00119	GBR	EUR	207	1613	78	15	47	0.227053
HG00132	GBR	EUR	205	1607	91	10	52	0.253659
HG00137	GBR	EUR	222	1598	79	12	49	0.220721
HG00105	GBR	EUR	229	1577	89	15	49	0.213974
HG00149	GBR	EUR	219	1592	84	15	47	0.214612
HG00251	GBR	EUR	201	1607	86	15	36	0.179104
HG00150	GBR	EUR	234	1582	76	14	53	0.226496
HG00115	GBR	EUR	215	1585	92	13	48	0.223256
HG00236	GBR	EUR	214	1599	77	15	46	0.214953
HG00155	GBR	EUR	199	1610	80	15	50	0.251256
HG00244	GBR	EUR	207	1607	76	13	37	0.178744
HG00139	GBR	EUR	220	1593	76	13	41	0.186364
HG00103	GBR	EUR	221	1579	86	15	43	0.19457
HG00231	GBR	EUR	209	1602	81	9	50	0.239234
HG00126	GBR	EUR	231	1564	87	16	52	0.225108
HG00145	GBR	EUR	219	1582	83	10	43	0.196347
HG00131	GBR	EUR	209	1577	91	16	47	0.22488
HG00100	GBR	EUR	213	1570	94	14	48	0.225352
HG00117	GBR	EUR	223	1573	78	16	45	0.201794
HG00234	GBR	EUR	207	1584	81	18	38	0.183575
HG00123	GBR	EUR	211	1569	94	15	46	0.218009
HG00102	GBR	EUR	223	1582	72	10	45	0.201794
HG00138	GBR	EUR	199	1583	89	14	33	0.165829
HG00154	GBR	EUR	221	1575	73	15	40	0.180995
HG00113	GBR	EUR	201	1581	82	17	44	0.218905
HG00250	GBR	EUR	194	1583	84	18	43	0.221649
HG00106	GBR	EUR	215	1565	87	11	46	0.213953
HG00129	GBR	EUR	230	1550	81	16	45	0.195652
HG00239	GBR	EUR	202	1571	89	15	38	0.188119
HG00099	GBR	EUR	229	1549	87	11	50	0.218341
HG00262	GBR	EUR	200	1574	88	12	42	0.21
HG00263	GBR	EUR	219	1549	93	13	50	0.228311
HG00122	GBR	EUR	217	1551	90	15	46	0.211982
HG00109	GBR	EUR	214	1570	77	11	39	0.182243
HG00237	GBR	EUR	211	1553	94	13	46	0.218009
HG00142	GBR	EUR	225	1561	71	12	50	0.222222
HG00108	GBR	EUR	211	1570	72	13	42	0.199052
HG00157	GBR	EUR	212	1566	73	15	42	0.198113
HG00265	GBR	EUR	210	1547	95	13	41	0.195238
HG00118	GBR	EUR	206	1555	86	16	36	0.174757
HG00148	GBR	EUR	222	1545	78	18	44	0.198198
HG00160	GBR	EUR	214	1551	85	13	46	0.214953
HG00151	GBR	EUR	204	1563	82	13	42	0.205882
HG00158	GBR	EUR	201	1570	81	10	43	0.21393
HG00254	GBR	EUR	189	1575	88	8	40	0.21164
HG00141	GBR	EUR	220	1543	79	17	42	0.190909
HG00252	GBR	EUR	216	1551	81	11	41	0.189815
HG00240	GBR	EUR	223	1538	80	17	44	0.197309
HG00121	GBR	EUR	213	1553	74	16	44	0.206573
HG00111	GBR	EUR	212	1541	83	18	49	0.231132
HG00264	GBR	EUR	208	1553	81	10	47	0.225962
HG01790	GBR	EUR	187	1570	81	14	42	0.224599
HG00261	GBR	EUR	217	1538	80	13	52	0.239631
HG01791	GBR	EUR	207	1549	79	13	49	0.236715
HG00260	GBR	EUR	221	1540	69	17	42	0.190045
HG00238	GBR	EUR	208	1542	80	13	39	0.1875
HG00096	GBR	EUR	192	1552	84	14	39	0.203125
HG00246	GBR	EUR	195	1539	95	12	38	0.194872
HG00101	GBR	EUR	215	1525	81	17	45	0.209302
HG00125	GBR	EUR	198	1536	90	13	42	0.212121
HG00114	GBR	EUR	219	1531	73	13	40	0.182648
HG00097	GBR	EUR	205	1532	82	15	42	0.204878
HG00143	GBR	EUR	206	1523	83	15	36	0.174757
HG00159	GBR	EUR	201	1517	86	16	48	0.238806
HG00257	GBR	EUR	206	1526	72	11	42	0.203883
HG02215	GBR	EUR	210	1518	72	13	41	0.195238
HG00107	GBR	EUR	199	1505	94	10	43	0.21608
HG00112	GBR	EUR	197	1479	76	18	45	0.228426
HG00326	FIN	EUR	234	1672	98	14	48	0.205128
HG00274	FIN	EUR	216	1647	85	11	45	0.208333
HG00355	FIN	EUR	236	1615	80	18	52	0.220339
HG00350	FIN	EUR	219	1630	82	17	43	0.196347
HG00319	FIN	EUR	199	1652	77	17	42	0.211055
HG00315	FIN	EUR	214	1625	88	16	38	0.17757
HG00334	FIN	EUR	229	1620	75	19	52	0.227074
HG00272	FIN	EUR	221	1618	85	15	43	0.19457
HG00361	FIN	EUR	210	1623	88	16	46	0.219048
HG00353	FIN	EUR	224	1606	93	13	45	0.200893
HG00330	FIN	EUR	216	1633	73	13	38	0.175926
HG00273	FIN	EUR	215	1617	89	13	44	0.204651
HG00357	FIN	EUR	199	1642	83	10	44	0.221106
HG00266	FIN	EUR	212	1614	90	15	50	0.235849
HG00331	FIN	EUR	221	1612	82	16	46	0.208145
HG00174	FIN	EUR	224	1593	95	16	43	0.191964
HG00183	FIN	EUR	224	1618	71	13	48	0.214286
HG00345	FIN	EUR	216	1608	88	14	50	0.231481
HG00323	FIN	EUR	228	1593	89	15	41	0.179825
HG00267	FIN	EUR	194	1640	80	10	38	0.195876
HG00379	FIN	EUR	216	1603	89	16	40	0.185185
HG00378	FIN	EUR	204	1618	86	14	49	0.240196
HG00304	FIN	EUR	215	1611	81	14	39	0.181395
HG00188	FIN	EUR	239	1580	88	13	50	0.209205
HG00271	FIN	EUR	212	1606	89	12	43	0.20283
HG00381	FIN	EUR	210	1603	88	16	39	0.185714
HG00284	FIN	EUR	226	1577	97	15	44	0.19469
HG00373	FIN	EUR	212	1608	79	16	45	0.212264
HG00371	FIN	EUR	218	1595	83	17	50	0.229358
HG00368	FIN	EUR	227	1592	77	13	56	0.246696
HG00180	FIN	EUR	223	1590	77	17	47	0.210762
HG00342	FIN	EUR	218	1596	81	12	47	0.215596
HG00278	FIN	EUR	213	1593	84	16	38	0.178404
HG00339	FIN	EUR	216	1592	81	16	45	0.208333
HG00369	FIN	EUR	222	1591	79	12	45	0.202703
HG00321	FIN	EUR	227	1576	86	14	47	0.207048
HG00367	FIN	EUR	208	1580	96	16	40	0.192308
HG00285	FIN	EUR	218	1577	91	13	42	0.192661
HG00313	FIN	EUR	205	1602	76	16	33	0.160976
HG00276	FIN	EUR	210	1582	92	14	45	0.214286
HG00337	FIN	EUR	221	1581	85	11	39	0.176471
HG00309	FIN	EUR	197	1605	79	15	37	0.187817
HG00186	FIN	EUR	228	1569	84	14	49	0.214912
HG00178	FIN	EUR	195	1608	73	18	32	0.164103
HG00375	FIN	EUR	209	1584	87	12	49	0.23445
HG00349	FIN	EUR	216	1572	89	13	46	0.212963
HG00362	FIN	EUR	220	1576	81	13	47	0.213636
HG00380	FIN	EUR	205	1586	86	10	37	0.180488
HG00171	FIN	EUR	218	1574	78	14	40	0.183486
HG00177	FIN	EUR	200	1585	83	16	46	0.23
HG00341	FIN	EUR	207	1574	88	15	45	0.217391
HG00344	FIN	EUR	212	1579	79	14	40	0.188679
HG00182	FIN	EUR	217	1566	84	16	46	0.211982
HG00365	FIN	EUR	206	1586	78	12	41	0.199029
HG00282	FIN	EUR	212	1574	84	11	40	0.188679
HG00306	FIN	EUR	211	1586	70	12	43	0.203791
HG00343	FIN	EUR	215	1552	92	20	46	0.213953
HG00268	FIN	EUR	197	1592	78	11	48	0.243655
HG00332	FIN	EUR	195	1587	84	12	32	0.164103
HG00351	FIN	EUR	208	1566	90	13	43	0.206731
HG00372	FIN	EUR	218	1561	84	14	45	0.206422
HG00366	FIN	EUR	202	1569	90	15	38	0.188119
HG00329	FIN	EUR	196	1584	80	14	40	0.204082
HG00324	FIN	EUR	195	1570	89	19	41	0.210256
HG00310	FIN	EUR	221	1555	85	11	52	0.235294
HG00356	FIN	EUR	225	1551	77	19	48	0.213333
HG00360	FIN	EUR	214	1562	84	12	52	0.242991
HG00281	FIN	EUR	203	1576	79	13	40	0.197044
HG00173	FIN	EUR	209	1570	75	15	39	0.186603
HG00358	FIN	EUR	214	1559	81	15	54	0.252336
HG00308	FIN	EUR	211	1559	84	14	41	0.194313
HG00181	FIN	EUR	205	1569	80	13	41	0.2
HG00318	FIN	EUR	185	1588	78	16	44	0.237838
HG00376	FIN	EUR	210	1557	87	13	45	0.214286
HG00290	FIN	EUR	206	1558	87	14	41	0.199029
HG00280	FIN	EUR	203	1559	87	15	42	0.206897
HG00311	FIN	EUR	213	1550	87	9	38	0.178404
HG00185	FIN	EUR	216	1541	83	14	46	0.212963
HG00335	FIN	EUR	207	1557	76	14	41	0.198068
HG00328	FIN	EUR	219	1542	79	13	45	0.205479
HG00190	FIN	EUR	203	1549	80	17	38	0.187192
[truncated: 507 more rows]

## Sheet: B
B. 1KGP 2504 disitrubtion of shared and unique MEI sites (Figure 5B).
Population	Superpopulation	ALL	SHARED	UNIQUE	SINGLETONS
ACB	AFR	3954	10755	1076	998
LWK	AFR	3954	9505	2274	1667
GWD	AFR	3954	9764	1593	1340
YRI	AFR	3954	10007	1086	1000
MSL	AFR	3954	9651	1127	958
ESN	AFR	3954	9562	934	835
ASW	AFR	3954	9302	695	638
PUR	AMR	3954	7850	740	577
CLM	AMR	3954	6693	840	691
PEL	AMR	3954	4711	1024	926
MXL	AMR	3954	4869	669	608
KHV	EAS	3954	4001	1102	987
CHS	EAS	3954	3700	1213	1120
CHB	EAS	3954	3766	1147	1095
CDX	EAS	3954	3591	990	846
JPT	EAS	3954	3220	1253	974
IBS	EUR	3954	5064	838	807
TSI	EUR	3954	4517	949	871
CEU	EUR	3954	4257	661	633
GBR	EUR	3954	4044	613	570
FIN	EUR	3954	3859	559	415
STU	SAS	3954	4791	1031	907
PJL	SAS	3954	4816	923	810
ITU	SAS	3954	4743	968	857
BEB	SAS	3954	4763	897	840
GIH	SAS	3954	4663	824	708

## Sheet: C
C. Counts of Amish, JHS, UKBB shared and unique MEI sites.
Study	Sequencing	ALL	SHARED	UNIQUE	SINGLETONS
JHS	WGS	23	6177	43683	14527
Amish	WGS	23	6080	4948	1304
UKBB	WES	23	131	3873	1182

## Sheet: Legend
A. 1KGP 2504 distribution of MEI counts.
											Population	Population description					Superpopulation	Superpopulation Name
Sample	Sample identifier										GBR	British in England and Scotland					EAS	East Asian Ancestry
Population	1000 genome project sample population										FIN	Finnish in Finland					EUR	European Ancestry
Superpopulation	1000 genome project sample superpopulation										CHS	Han Chinese South					AFR	African Ancestry
LINE1	Number of LINE1s										PUR	Puerto Rican in Puerto Rico					AMR	American Ancestry
Alu	Number of Alus										CDX	Chinese Dai in Xishuangbanna, China					SAS	South Asian Ancestry
SVA	Number of SVAs										CLM	Colombian in Medellin, Colombia
HERVK	Number of HERVKs										IBS	Iberian populations in Spain
FL-L1s	Number of Full-Length L1s										PEL	Peruvian in Lima, Peru
FL fraction	Fraction of Total L1s that are Full-Length										PJL	Punjabi in Lahore, Pakistan
											KHV	Kinh in Ho Chi Minh City, Vietnam
											ACB	African Caribbean in Barbados
B. 1KGP 2504 disitrubtion of shared and unique MEI sites.											GWD	Gambian in Western Division, The Gambia - Mandinka
											ESN	Esan in Nigeria
Population	1000 genome project sample population										BEB	Bengali in Bangladesh
Superpopulation	1000 genome project sample superpopulation										MSL	Mende in Sierra Leone
ALL	Number of MEIs that are found in ALL populations										STU	Sri Lankan Tamil in the UK
SHARED	Number of MEIs that are SHARED in more than 1 population but not in ALL populations										ITU	Indian Telugu in the UK
UNIQUE	Number of MEIs that are UNIQUE to a single population										CEU	Utah residents (CEPH) with Northern and Western European ancestry
SINGLETONS	Number of MEIs that are found in only one individual										YRI	Yoruba in Ibadan, Nigeria
											CHB	Han Chinese in Beijing, China
											JPT	Japanese in Tokyo, Japan
C. Counts of Amish, JHS, UKBB shared and unique MEI sites.											LWK	Luhya in Webuye, Kenya
											ASW	African Ancestry in Southwest US
Study	Amish Study, Jackson Heart Study, or United Kingdom BioBank Study										MXL	Mexican Ancestry in Los Angeles, California
Sequencing	Sequencing type: Whole Genome Sequence (WGS) or Whole Exome Sequence (WES)										TSI	Toscani in Italy
ALL	Number of MEIs that are found in ALL populations										GIH	Gujarati Indians in Houston, TX
SHARED	Number of MEIs that are SHARED in more than 1 study but not in ALL studies
UNIQUE	Number of MEIs that are UNIQUE to a single study
SINGLETONS	Number of MEIs that are found in only one individual
