# Supplementary material for: Mutagenesis of human genomes by endogenous mobile elements on a population scale
Source: HighWire-hosted journal article supplement (doi:10.1101/gr.275323.121), 2021-11-12
Supplement: Supplemental_Table_S6.xlsx [file Supplemental_Table_S6.xlsx]

## Sheet: A
Supplemental_Table_S6.xlsx. MEI mutagenesis of GENCODE and ENCODE annotated features.
A. MEIs in GENCODE Gene Features (Figure 6A).
CHR	POS	Feature Type	Genomic Start	Genomic End	Strand	Gene Name	Gene ID	Gene Type	Level	Exon Number	Transcript Name	Transcript Support Level
10	100554008	exon;three_prime_UTR	100548093;100548138	100559998;100559998	+;+	HIF1AN;HIF1AN	ENSG00000166135.14;ENSG00000166135.14	protein_coding;protein_coding	2;2	8;8	HIF1AN-201;HIF1AN-201	1;1
10	100926114	exon;CDS	100925949;100925949	100926760;100926254	+;+	SLF2;SLF2	ENSG00000119906.13;ENSG00000119906.13	protein_coding;protein_coding	2;2	6;6	SLF2-203;SLF2-203	1;1
10	100962744	exon;three_prime_UTR	100961877;100961913	100965134;100965134	+;+	SLF2;SLF2	ENSG00000119906.13;ENSG00000119906.13	protein_coding;protein_coding	2;2	20;20	SLF2-201;SLF2-201	1;1
10	100965036	exon;three_prime_UTR	100961877;100961913	100965134;100965134	+;+	SLF2;SLF2	ENSG00000119906.13;ENSG00000119906.13	protein_coding;protein_coding	2;2	20;20	SLF2-201;SLF2-201	1;1
10	100983902	exon;CDS;exon;CDS	100983305;100983305;100983305;100983305	100984837;100984131;100985615;100984131	+;+;+;+	SEMA4G;SEMA4G;SEMA4G;SEMA4G	ENSG00000095539.15;ENSG00000095539.15;ENSG00000095539.15;ENSG00000095539.15	protein_coding;protein_coding;protein_coding;protein_coding	2;2;2;2	14;14;14;14	SEMA4G-202;SEMA4G-202;SEMA4G-201;SEMA4G-201	5;5;1;1
10	101065450	exon;three_prime_UTR	101064826;101064921	101067059;101067059	+;+	KAZALD1;KAZALD1	ENSG00000107821.15;ENSG00000107821.15	protein_coding;protein_coding	2;2	5;5	KAZALD1-201;KAZALD1-201	1;1
10	101845758	exon;three_prime_UTR	101845599;101845599	101847620;101847527	-;-	ARMH3;ARMH3	ENSG00000120029.13;ENSG00000120029.13	protein_coding;protein_coding	2;2	26;26	ARMH3-202;ARMH3-202	5;5
10	102162617	exon;three_prime_UTR;exon;three_prime_UTR	102162111;102162270;102162111;102162270	102163871;102163871;102163870;102163870	+;+;+;+	NOLC1;NOLC1;NOLC1;NOLC1	ENSG00000166197.17;ENSG00000166197.17;ENSG00000166197.17;ENSG00000166197.17	protein_coding;protein_coding;protein_coding;protein_coding	3;3;2;2	13;13;13;13	NOLC1-202;NOLC1-202;NOLC1-209;NOLC1-209	1;1;1;1
10	102476062	exon;three_prime_UTR	102475722;102475985	102477045;102477045	+;+	MFSD13A;MFSD13A	ENSG00000138111.14;ENSG00000138111.14	protein_coding;protein_coding	2;2	10;10	MFSD13A-201;MFSD13A-201	5;5
10	102915209	exon	102914585	102915404	+	AL356608.1	ENSG00000272912.1	lncRNA	2	1	AL356608.1-201	NA
10	103247554	exon;three_prime_UTR	103245887;103246684	103248016;103248016	+;+	RPEL1;RPEL1	ENSG00000235376.5;ENSG00000235376.5	protein_coding;protein_coding	3;3	1;1	RPEL1-201;RPEL1-201	NA;NA
10	103351107	exon;five_prime_UTR	103350707;103351067	103351140;103351140	-;-	PCGF6;PCGF6	ENSG00000156374.16;ENSG00000156374.16	protein_coding;protein_coding	2;2	1;1	PCGF6-202;PCGF6-202	1;1
10	104028454	exon;three_prime_UTR;exon;three_prime_UTR	104025574;104025721;104025574;104025721	104029233;104029233;104029233;104029233	+;+;+;+	SLK;SLK;SLK;SLK	ENSG00000065613.15;ENSG00000065613.15;ENSG00000065613.15;ENSG00000065613.15	protein_coding;protein_coding;protein_coding;protein_coding	2;2;2;2	19;19;18;18	SLK-202;SLK-202;SLK-201;SLK-201	1;1;1;1
10	108069251	exon;exon;exon;exon	108069182;108069182;108069182;108069182	108069295;108069294;108069302;108069307	-;-;-;-	LINC01435;LINC01435;LINC01435;LINC01435	ENSG00000229981.8;ENSG00000229981.8;ENSG00000229981.8;ENSG00000229981.8	lncRNA;lncRNA;lncRNA;lncRNA	2;2;2;2	1;1;1;1	LINC01435-225;LINC01435-201;LINC01435-222;LINC01435-223	None;3;None;None
10	10946968	exon;exon;exon	10946786;10946786;10946786	10947556;10947319;10947122	-;-;-	LINC00710;LINC00710;LINC00710	ENSG00000229240.9;ENSG00000229240.9;ENSG00000229240.9	lncRNA;lncRNA;lncRNA	2;2;2	2;3;4	LINC00710-237;LINC00710-224;LINC00710-229	None;None;None
10	109680717	exon	109680442	109681041	+	XIAPP1	ENSG00000270294.1	processed_pseudogene	1	1	XIAPP1-201	NA
10	110898177	exon;three_prime_UTR;exon;three_prime_UTR	110898028;110898089;110898028;110898089	110900005;110900005;110900006;110900006	+;+;+;+	PDCD4;PDCD4;PDCD4;PDCD4	ENSG00000150593.18;ENSG00000150593.18;ENSG00000150593.18;ENSG00000150593.18	protein_coding;protein_coding;protein_coding;protein_coding	3;3;2;2	13;13;12;12	PDCD4-202;PDCD4-202;PDCD4-201;PDCD4-201	1;1;1;1
10	110898559	exon;three_prime_UTR;exon;three_prime_UTR	110898028;110898089;110898028;110898089	110900005;110900005;110900006;110900006	+;+;+;+	PDCD4;PDCD4;PDCD4;PDCD4	ENSG00000150593.18;ENSG00000150593.18;ENSG00000150593.18;ENSG00000150593.18	protein_coding;protein_coding;protein_coding;protein_coding	3;3;2;2	13;13;12;12	PDCD4-202;PDCD4-202;PDCD4-201;PDCD4-201	1;1;1;1
10	112156682	exon;three_prime_UTR	112153870;112153870	112157389;112157236	-;-	GPAM;GPAM	ENSG00000119927.14;ENSG00000119927.14	protein_coding;protein_coding	2;2	19;19	GPAM-202;GPAM-202	1;1
10	113166142	exon;three_prime_UTR;exon;three_prime_UTR;exon;three_prime_UTR;exon;three_prime_UTR;exon;three_prime_UTR;exon;three_prime_UTR;exon;three_prime_UTR;exon;three_prime_UTR;exon;three_prime_UTR	113165555;113165973;113165555;113165635;113165555;113165635;113165555;113165973;113165555;113165973;113165555;113165973;113165555;113165973;113165555;113165973;113165555;113165555	113167678;113167678;113167678;113167678;113167678;113167678;113167678;113167678;113167678;113167678;113167678;113167678;113167678;113167678;113167678;113167678;113166160;113166160	+;+;+;+;+;+;+;+;+;+;+;+;+;+;+;+;+;+	TCF7L2;TCF7L2;TCF7L2;TCF7L2;TCF7L2;TCF7L2;TCF7L2;TCF7L2;TCF7L2;TCF7L2;TCF7L2;TCF7L2;TCF7L2;TCF7L2;TCF7L2;TCF7L2;TCF7L2;TCF7L2	ENSG00000148737.17;ENSG00000148737.17;ENSG00000148737.17;ENSG00000148737.17;ENSG00000148737.17;ENSG00000148737.17;ENSG00000148737.17;ENSG00000148737.17;ENSG00000148737.17;ENSG00000148737.17;ENSG00000148737.17;ENSG00000148737.17;ENSG00000148737.17;ENSG00000148737.17;ENSG00000148737.17;ENSG00000148737.17;ENSG00000148737.17;ENSG00000148737.17	protein_coding;protein_coding;protein_coding;protein_coding;protein_coding;protein_coding;protein_coding;protein_coding;protein_coding;protein_coding;protein_coding;protein_coding;protein_coding;protein_coding;protein_coding;protein_coding;protein_coding;protein_coding	2;2;3;3;3;3;3;3;3;3;3;3;3;3;2;2;2;2	14;14;11;11;14;14;13;13;15;15;15;15;14;14;14;14;15;15	TCF7L2-222;TCF7L2-222;TCF7L2-216;TCF7L2-216;TCF7L2-218;TCF7L2-218;TCF7L2-217;TCF7L2-217;TCF7L2-206;TCF7L2-206;TCF7L2-219;TCF7L2-219;TCF7L2-220;TCF7L2-220;TCF7L2-210;TCF7L2-210;TCF7L2-221;TCF7L2-221	1;1;1;1;1;1;1;1;1;1;5;5;1;1;1;1;1;1
10	114295035	exon;three_prime_UTR;exon;three_prime_UTR	114294824;114294824;114294824;114294824	114296068;114296041;114296068;114296041	-;-;-;-	AFAP1L2;AFAP1L2;AFAP1L2;AFAP1L2	ENSG00000169129.15;ENSG00000169129.15;ENSG00000169129.15;ENSG00000169129.15	protein_coding;protein_coding;protein_coding;protein_coding	2;2;2;2	19;19;19;19	AFAP1L2-201;AFAP1L2-201;AFAP1L2-202;AFAP1L2-202	1;1;1;1
10	11457718	exon;three_prime_UTR	11453946;11453946	11463849;11462440	-;-	USP6NL;USP6NL	ENSG00000148429.14;ENSG00000148429.14	protein_coding;protein_coding	2;2	15;15	USP6NL-205;USP6NL-205	1;1
10	114975487	exon;three_prime_UTR	114975123;114975380	114977676;114977676	+;+	TRUB1;TRUB1	ENSG00000165832.6;ENSG00000165832.6	protein_coding;protein_coding	2;2	8;8	TRUB1-201;TRUB1-201	1;1
10	115127853	exon	115123482	115129113	-	AC016042.1	ENSG00000285582.1	lncRNA	2	3	AC016042.1-201	None
10	115171303	exon;CDS;exon;three_prime_UTR	115171037;115171037;115171037;115171230	115171376;115171348;115171327;115171327	+;+;+;+	ATRNL1;ATRNL1;ATRNL1;ATRNL1	ENSG00000107518.18;ENSG00000107518.18;ENSG00000107518.18;ENSG00000107518.18	protein_coding;protein_coding;protein_coding;protein_coding	2;2;1;1	8;8;7;7	ATRNL1-209;ATRNL1-209;ATRNL1-207;ATRNL1-207	1;1;5;5
10	115945608	exon;three_prime_UTR	115944658;115944780	115948999;115948999	+;+	ATRNL1;ATRNL1	ENSG00000107518.18;ENSG00000107518.18	protein_coding;protein_coding	2;2	29;29	ATRNL1-201;ATRNL1-201	1;1
10	115947134	exon;three_prime_UTR	115944658;115944780	115948999;115948999	+;+	ATRNL1;ATRNL1	ENSG00000107518.18;ENSG00000107518.18	protein_coding;protein_coding	2;2	29;29	ATRNL1-201;ATRNL1-201	1;1
10	116062496	exon;three_prime_UTR;exon;three_prime_UTR	116056925;116056925;116056933;116056933	116064544;116064397;116064544;116064397	-;-;-;-	GFRA1;GFRA1;GFRA1;GFRA1	ENSG00000151892.14;ENSG00000151892.14;ENSG00000151892.14;ENSG00000151892.14	protein_coding;protein_coding;protein_coding;protein_coding	2;2;3;3	9;9;10;10	GFRA1-203;GFRA1-203;GFRA1-204;GFRA1-204	1;1;2;2
10	116477334	exon;three_prime_UTR	116477090;116477154	116477957;116477957	+;+	PNLIPRP3;PNLIPRP3	ENSG00000203837.5;ENSG00000203837.5	protein_coding;protein_coding	2;2	12;12	PNLIPRP3-201;PNLIPRP3-201	1;1
10	116645095	exon;CDS;stop_codon;exon;CDS;stop_codon;exon;CDS;stop_codon	116645034;116645034;116645095;116645034;116645034;116645095;116645034;116645034;116645095	116645143;116645097;116645097;116645097;116645097;116645097;116645143;116645097;116645097	+;+;+;+;+;+;+;+;+	PNLIPRP2;PNLIPRP2;PNLIPRP2;PNLIPRP2;PNLIPRP2;PNLIPRP2;PNLIPRP2;PNLIPRP2;PNLIPRP2	ENSG00000266200.6;ENSG00000266200.6;ENSG00000266200.6;ENSG00000266200.6;ENSG00000266200.6;ENSG00000266200.6;ENSG00000266200.6;ENSG00000266200.6;ENSG00000266200.6	polymorphic_pseudogene;polymorphic_pseudogene;polymorphic_pseudogene;polymorphic_pseudogene;polymorphic_pseudogene;polymorphic_pseudogene;polymorphic_pseudogene;polymorphic_pseudogene;polymorphic_pseudogene	2;2;2;3;3;3;3;3;3	13;13;13;13;13;13;13;13;13	PNLIPRP2-201;PNLIPRP2-201;PNLIPRP2-201;PNLIPRP2-205;PNLIPRP2-205;PNLIPRP2-205;PNLIPRP2-204;PNLIPRP2-204;PNLIPRP2-204	2;2;2;5;5;5;5;5;5
10	116883898	exon;three_prime_UTR;exon;three_prime_UTR;exon;three_prime_UTR	116881477;116881477;116881482;116881482;116883377;116883377	116886566;116886343;116886566;116886554;116886566;116886343	-;-;-;-;-;-	SHTN1;SHTN1;SHTN1;SHTN1;SHTN1;SHTN1	ENSG00000187164.20;ENSG00000187164.20;ENSG00000187164.20;ENSG00000187164.20;ENSG00000187164.20;ENSG00000187164.20	protein_coding;protein_coding;protein_coding;protein_coding;protein_coding;protein_coding	2;2;2;2;3;3	17;17;15;15;16;16	SHTN1-202;SHTN1-202;SHTN1-207;SHTN1-207;SHTN1-201;SHTN1-201	2;2;1;1;2;2
10	1181653	exon;three_prime_UTR	1177313;1177313	1183369;1183192	-;-	ADARB2;ADARB2	ENSG00000185736.16;ENSG00000185736.16	protein_coding;protein_coding	2;2	10;10	ADARB2-203;ADARB2-203	1;1
10	118573609	exon	118573516	118573620	+	SLC25A18P1	ENSG00000234309.1	processed_pseudogene	1	2	SLC25A18P1-201	NA
10	119167736	exon;three_prime_UTR	119167720;119167720	119168533;119168479	-;-	PRDX3;PRDX3	ENSG00000165672.7;ENSG00000165672.7	protein_coding;protein_coding	2;2	7;7	PRDX3-201;PRDX3-201	1;1
10	119816096	exon	119815229	119816642	-	PHACTR2P1	ENSG00000270300.2	transcribed_processed_pseudogene	1	1	PHACTR2P1-201	NA
10	119915769	exon;CDS;exon;CDS	119915748;119915748;119915757;119915757	119915889;119915889;119915807;119915807	+;+;+;+	SEC23IP;SEC23IP;SEC23IP;SEC23IP	ENSG00000107651.13;ENSG00000107651.13;ENSG00000107651.13;ENSG00000107651.13	protein_coding;protein_coding;protein_coding;protein_coding	2;2;3;3	8;8;9;9	SEC23IP-201;SEC23IP-201;SEC23IP-208;SEC23IP-208	1;1;5;5
10	120831092	exon	120830219	120831161	-	WDR11-AS1	ENSG00000227165.9	lncRNA	2	1	WDR11-AS1-208	None
10	12122114	exon;three_prime_UTR	12120787;12120889	12123221;12123221	+;+	DHTKD1;DHTKD1	ENSG00000181192.12;ENSG00000181192.12	protein_coding;protein_coding	2;2	17;17	DHTKD1-201;DHTKD1-201	1;1
10	12164678	exon;three_prime_UTR;exon;three_prime_UTR;exon;three_prime_UTR	12164268;12164455;12164268;12164455;12164268;12164455	12165404;12165404;12165407;12165407;12165412;12165412	+;+;+;+;+;+	SEC61A2;SEC61A2;SEC61A2;SEC61A2;SEC61A2;SEC61A2	ENSG00000065665.21;ENSG00000065665.21;ENSG00000065665.21;ENSG00000065665.21;ENSG00000065665.21;ENSG00000065665.21	protein_coding;protein_coding;protein_coding;protein_coding;protein_coding;protein_coding	3;3;2;2;2;2	11;11;12;12;11;11	SEC61A2-205;SEC61A2-205;SEC61A2-201;SEC61A2-201;SEC61A2-204;SEC61A2-204	2;2;1;1;5;5
10	12167249	exon;three_prime_UTR	12165330;12165330	12167811;12167701	-;-	NUDT5;NUDT5	ENSG00000165609.13;ENSG00000165609.13	protein_coding;protein_coding	2;2	10;10	NUDT5-207;NUDT5-207	1;1
10	121961440	exon;CDS	121961423;121961423	121961517;121961517	-;-	NSMCE4A;NSMCE4A	ENSG00000107672.15;ENSG00000107672.15	protein_coding;protein_coding	2;2	7;7	NSMCE4A-202;NSMCE4A-202	1;1
10	12237214	exon;CDS	12237144;12237144	12237266;12237266	+;+	CDC123;CDC123	ENSG00000151465.14;ENSG00000151465.14	protein_coding;protein_coding	2;2	9;9	CDC123-201;CDC123-201	1;1
10	122434543	exon;three_prime_UTR	122429624;122429939	122442602;122442602	+;+	PLEKHA1;PLEKHA1	ENSG00000107679.14;ENSG00000107679.14	protein_coding;protein_coding	2;2	12;12	PLEKHA1-203;PLEKHA1-203	1;1
10	12250581	exon;three_prime_UTR	12250311;12250338	12250589;12250589	+;+	CDC123;CDC123	ENSG00000151465.14;ENSG00000151465.14	protein_coding;protein_coding	2;2	13;13	CDC123-201;CDC123-201	1;1
10	122820364	exon;exon	122820363;122820363	122820395;122820550	+;+	DMBT1L1;DMBT1L1	ENSG00000176584.18;ENSG00000176584.18	transcribed_unitary_pseudogene;transcribed_unitary_pseudogene	1;2	21;2	DMBT1L1-204;DMBT1L1-202	NA;2
10	122931495	exon;three_prime_UTR	122930901;122930901	122932661;122932426	-;-	C10orf88;C10orf88	ENSG00000119965.13;ENSG00000119965.13	protein_coding;protein_coding	2;2	6;6	C10orf88-204;C10orf88-204	1;1
10	123164182	exon;three_prime_UTR	123163820;123163836	123170467;123170467	+;+	BUB3;BUB3	ENSG00000154473.18;ENSG00000154473.18	protein_coding;protein_coding	2;2	8;8	BUB3-203;BUB3-203	1;1
10	123746186	exon;three_prime_UTR	123745639;123745639	123747017;123746763	-;-	CPXM2;CPXM2	ENSG00000121898.13;ENSG00000121898.13	protein_coding;protein_coding	2;2	14;14	CPXM2-201;CPXM2-201	1;1
10	124760304	exon;three_prime_UTR;exon;three_prime_UTR	124756254;124756254;124757834;124757834	124760503;124760408;124760503;124760502	-;-;-;-	EEF1AKMT2;EEF1AKMT2;EEF1AKMT2;EEF1AKMT2	ENSG00000203791.15;ENSG00000203791.15;ENSG00000203791.15;ENSG00000203791.15	protein_coding;protein_coding;protein_coding;protein_coding	2;2;2;2	6;6;7;7	EEF1AKMT2-207;EEF1AKMT2-207;EEF1AKMT2-201;EEF1AKMT2-201	None;None;1;1
10	124945434	exon	124945204	124945909	-	AL731577.1	ENSG00000226899.1	lncRNA	2	2	AL731577.1-201	5
10	124985628	exon;three_prime_UTR;exon;three_prime_UTR;exon;three_prime_UTR	124984774;124984993;124984317;124984317;124984317;124984317	124988189;124988189;124989698;124989517;124989698;124989517	+;+;-;-;-;-	ZRANB1;ZRANB1;CTBP2;CTBP2;CTBP2;CTBP2	ENSG00000019995.6;ENSG00000019995.6;ENSG00000175029.17;ENSG00000175029.17;ENSG00000175029.17;ENSG00000175029.17	protein_coding;protein_coding;protein_coding;protein_coding;protein_coding;protein_coding	2;2;2;2;2;2	9;9;9;9;11;11	ZRANB1-201;ZRANB1-201;CTBP2-201;CTBP2-201;CTBP2-203;CTBP2-203	1;1;1;1;1;1
10	124989171	exon;three_prime_UTR;exon;three_prime_UTR;exon;three_prime_UTR	124984317;124984317;124984317;124984317;124989135;124989135	124989698;124989517;124989698;124989517;124989698;124989517	-;-;-;-;-;-	CTBP2;CTBP2;CTBP2;CTBP2;CTBP2;CTBP2	ENSG00000175029.17;ENSG00000175029.17;ENSG00000175029.17;ENSG00000175029.17;ENSG00000175029.17;ENSG00000175029.17	protein_coding;protein_coding;protein_coding;protein_coding;protein_coding;protein_coding	2;2;2;2;2;2	9;9;11;11;9;9	CTBP2-201;CTBP2-201;CTBP2-203;CTBP2-203;CTBP2-202;CTBP2-202	1;1;1;1;1;1
10	125575942	exon	125575880	125576001	+	TEX36-AS1	ENSG00000237675.5	lncRNA	2	3	TEX36-AS1-202	1
10	125752804	exon;CDS;exon;CDS	125752799;125752799;125752799;125752799	125752914;125752914;125752914;125752914	+;+;+;+	EDRF1;EDRF1;EDRF1;EDRF1	ENSG00000107938.18;ENSG00000107938.18;ENSG00000107938.18;ENSG00000107938.18	protein_coding;protein_coding;protein_coding;protein_coding	1;1;1;1	22;22;23;23	EDRF1-201;EDRF1-201;EDRF1-202;EDRF1-202	5;5;1;1
10	125766505	exon;three_prime_UTR	125766453;125766453	125766961;125766661	-;-	MMP21;MMP21	ENSG00000154485.5;ENSG00000154485.5	protein_coding;protein_coding	2;2	7;7	MMP21-201;MMP21-201	1;1
10	125833910	exon;CDS;exon;CDS;exon;CDS	125833772;125833772;125833772;125833772;125833772;125833772	125833946;125833946;125833946;125833946;125833946;125833946	+;+;+;+;+;+	BCCIP;BCCIP;BCCIP;BCCIP;BCCIP;BCCIP	ENSG00000107949.17;ENSG00000107949.17;ENSG00000107949.17;ENSG00000107949.17;ENSG00000107949.17;ENSG00000107949.17	protein_coding;protein_coding;protein_coding;protein_coding;protein_coding;protein_coding	2;2;2;2;2;2	6;6;6;6;6;6	BCCIP-201;BCCIP-201;BCCIP-202;BCCIP-202;BCCIP-203;BCCIP-203	1;1;1;1;1;1
10	126414229	exon	126413869	126414738	-	LINC00601	ENSG00000235180.1	lncRNA	2	4	LINC00601-201	3
10	126425145	exon;three_prime_UTR	126425009;126425009	126425902;126425863	-;-	C10orf90;C10orf90	ENSG00000154493.19;ENSG00000154493.19	protein_coding;protein_coding	3;3	9;9	C10orf90-201;C10orf90-201	1;1
10	126464758	exon;CDS;exon;CDS	126464696;126464696;126464696;126464696	126464986;126464986;126464986;126464986	-;-;-;-	C10orf90;C10orf90;C10orf90;C10orf90	ENSG00000154493.19;ENSG00000154493.19;ENSG00000154493.19;ENSG00000154493.19	protein_coding;protein_coding;protein_coding;protein_coding	3;3;2;2	4;4;4;4	C10orf90-201;C10orf90-201;C10orf90-202;C10orf90-202	1;1;5;5
10	127025011	exon	127024770	127025263	-	AL359094.1	ENSG00000223528.7	lncRNA	1	2	AL359094.1-210	3
10	12829290	exon;three_prime_UTR;exon;three_prime_UTR	12828769;12828888;12828769;12828888	12835545;12835545;12829736;12829736	+;+;+;+	CAMK1D;CAMK1D;CAMK1D;CAMK1D	ENSG00000183049.13;ENSG00000183049.13;ENSG00000183049.13;ENSG00000183049.13	protein_coding;protein_coding;protein_coding;protein_coding	2;2;3;3	11;11;9;9	CAMK1D-204;CAMK1D-204;CAMK1D-203;CAMK1D-203	1;1;5;5
10	12829349	exon;three_prime_UTR;exon;three_prime_UTR	12828769;12828888;12828769;12828888	12835545;12835545;12829736;12829736	+;+;+;+	CAMK1D;CAMK1D;CAMK1D;CAMK1D	ENSG00000183049.13;ENSG00000183049.13;ENSG00000183049.13;ENSG00000183049.13	protein_coding;protein_coding;protein_coding;protein_coding	2;2;3;3	11;11;9;9	CAMK1D-204;CAMK1D-204;CAMK1D-203;CAMK1D-203	1;1;5;5
10	130182602	exon;three_prime_UTR	130180113;130180113	130182881;130182881	+;+	GLRX3;GLRX3	ENSG00000108010.12;ENSG00000108010.12	protein_coding;protein_coding	2;2	12;12	GLRX3-202;GLRX3-202	2;2
10	13126008	exon;CDS;exon;CDS;exon;CDS;exon;CDS;exon;CDS;exon;CDS	13125946;13125946;13125946;13125946;13125946;13125946;13125946;13125946;13125946;13125946;13125946;13125946	13126039;13126039;13126039;13126039;13126039;13126039;13126039;13126039;13126039;13126039;13126039;13126039	+;+;+;+;+;+;+;+;+;+;+;+	OPTN;OPTN;OPTN;OPTN;OPTN;OPTN;OPTN;OPTN;OPTN;OPTN;OPTN;OPTN	ENSG00000123240.17;ENSG00000123240.17;ENSG00000123240.17;ENSG00000123240.17;ENSG00000123240.17;ENSG00000123240.17;ENSG00000123240.17;ENSG00000123240.17;ENSG00000123240.17;ENSG00000123240.17;ENSG00000123240.17;ENSG00000123240.17	protein_coding;protein_coding;protein_coding;protein_coding;protein_coding;protein_coding;protein_coding;protein_coding;protein_coding;protein_coding;protein_coding;protein_coding	2;2;2;2;2;2;2;2;2;2;2;2	11;11;11;11;11;11;10;10;12;12;12;12	OPTN-201;OPTN-201;OPTN-206;OPTN-206;OPTN-202;OPTN-202;OPTN-205;OPTN-205;OPTN-204;OPTN-204;OPTN-203;OPTN-203	2;2;5;5;1;1;1;1;1;1;1;1
10	131998974	exon	131996738	131999846	+	AL162274.3	ENSG00000279982.1	TEC	2	1	AL162274.3-201	NA
10	132377848	exon;three_prime_UTR	132375066;132375243	132381508;132381508	+;+	LRRC27;LRRC27	ENSG00000148814.18;ENSG00000148814.18	protein_coding;protein_coding	2;2	11;11	LRRC27-204;LRRC27-204	1;1
10	132378409	exon;three_prime_UTR	132375066;132375243	132381508;132381508	+;+	LRRC27;LRRC27	ENSG00000148814.18;ENSG00000148814.18	protein_coding;protein_coding	2;2	11;11	LRRC27-204;LRRC27-204	1;1
10	13319092	exon;three_prime_UTR;exon;three_prime_UTR;exon;three_prime_UTR	13317428;13317428;13317439;13317439;13318080;13318080	13319356;13319141;13319356;13319141;13319356;13319141	-;-;-;-;-;-	SEPHS1;SEPHS1;SEPHS1;SEPHS1;SEPHS1;SEPHS1	ENSG00000086475.15;ENSG00000086475.15;ENSG00000086475.15;ENSG00000086475.15;ENSG00000086475.15;ENSG00000086475.15	protein_coding;protein_coding;protein_coding;protein_coding;protein_coding;protein_coding	2;2;3;3;2;2	9;9;8;8;8;8	SEPHS1-201;SEPHS1-201;SEPHS1-206;SEPHS1-206;SEPHS1-202;SEPHS1-202	1;1;1;1;1;1
10	133369982	exon;CDS	133369904;133369904	133370031;133370031	-;-	ECHS1;ECHS1	ENSG00000127884.5;ENSG00000127884.5	protein_coding;protein_coding	2;2	3;3	ECHS1-201;ECHS1-201	1;1
10	133420511	exon;three_prime_UTR	133420026;133420166	133422520;133422520	+;+	MTG1;MTG1	ENSG00000148824.19;ENSG00000148824.19	protein_coding;protein_coding	2;2	11;11	MTG1-201;MTG1-201	1;1
10	133526399	exon	133526259	133527513	-	AL161645.1	ENSG00000278518.1	lncRNA	2	1	AL161645.1-201	NA
10	13441544	exon;three_prime_UTR	13441355;13441355	13441750;13441742	-;-	BEND7;BEND7	ENSG00000165626.17;ENSG00000165626.17	protein_coding;protein_coding	2;2	8;8	BEND7-202;BEND7-202	1;1
10	13643411	exon	13638646	13644563	+	AL157392.3	ENSG00000239665.8	lncRNA	2	1	AL157392.3-215	NA
10	14878192	exon	14877688	14878686	-	AC069544.1	ENSG00000272853.1	lncRNA	2	1	AC069544.1-201	NA
10	15106480	exon;three_prime_UTR	15105770;15105770	15109215;15109194	-;-	NMT2;NMT2	ENSG00000152465.18;ENSG00000152465.18	protein_coding;protein_coding	2;2	12;12	NMT2-202;NMT2-202	1;1
10	15108203	exon;three_prime_UTR	15105770;15105770	15109215;15109194	-;-	NMT2;NMT2	ENSG00000152465.18;ENSG00000152465.18	protein_coding;protein_coding	2;2	12;12	NMT2-202;NMT2-202	1;1
10	17140739	exon;three_prime_UTR	17137336;17137336	17149140;17149039	-;-	TRDMT1;TRDMT1	ENSG00000107614.22;ENSG00000107614.22	protein_coding;protein_coding	2;2	11;11	TRDMT1-203;TRDMT1-203	1;1
10	17316973	exon;three_prime_UTR	17315421;17315421	17321346;17320877	-;-	ST8SIA6;ST8SIA6	ENSG00000148488.17;ENSG00000148488.17	protein_coding;protein_coding	2;2	8;8	ST8SIA6-201;ST8SIA6-201	1;1
10	17590032	exon;three_prime_UTR	17589032;17589032	17590446;17590363	-;-	HACD1;HACD1	ENSG00000165996.14;ENSG00000165996.14	protein_coding;protein_coding	2;2	7;7	HACD1-202;HACD1-202	1;1
10	18255037	exon	18253375	18257320	-	AL390783.1	ENSG00000235020.5	lncRNA	2	2	AL390783.1-206	None
10	18400640	exon;five_prime_UTR;exon;five_prime_UTR	18400575;18400575;18400634;18400634	18401100;18401031;18401100;18401031	+;+;+;+	CACNB2;CACNB2;CACNB2;CACNB2	ENSG00000165995.21;ENSG00000165995.21;ENSG00000165995.21;ENSG00000165995.21	protein_coding;protein_coding;protein_coding;protein_coding	2;2;2;2	1;1;1;1	CACNB2-204;CACNB2-204;CACNB2-222;CACNB2-222	1;1;None;None
10	18400657	exon;five_prime_UTR;exon;five_prime_UTR	18400575;18400575;18400634;18400634	18401100;18401031;18401100;18401031	+;+;+;+	CACNB2;CACNB2;CACNB2;CACNB2	ENSG00000165995.21;ENSG00000165995.21;ENSG00000165995.21;ENSG00000165995.21	protein_coding;protein_coding;protein_coding;protein_coding	2;2;2;2	1;1;1;1	CACNB2-204;CACNB2-204;CACNB2-222;CACNB2-222	1;1;None;None
10	18539759	exon;three_prime_UTR;exon;three_prime_UTR;exon;three_prime_UTR;exon;three_prime_UTR;exon;three_prime_UTR;exon;three_prime_UTR;exon;three_prime_UTR;exon;three_prime_UTR;exon;three_prime_UTR	18539230;18539725;18539230;18539725;18539230;18539725;18539230;18539725;18539230;18539725;18539230;18539725;18539230;18539230;18539230;18539725;18539230;18539725	18543557;18543557;18540763;18540763;18541862;18541862;18541862;18541862;18541869;18541869;18541109;18541109;18541862;18541862;18540275;18540275;18540600;18540600	+;+;+;+;+;+;+;+;+;+;+;+;+;+;+;+;+;+	CACNB2;CACNB2;CACNB2;CACNB2;CACNB2;CACNB2;CACNB2;CACNB2;CACNB2;CACNB2;CACNB2;CACNB2;CACNB2;CACNB2;CACNB2;CACNB2;CACNB2;CACNB2	ENSG00000165995.21;ENSG00000165995.21;ENSG00000165995.21;ENSG00000165995.21;ENSG00000165995.21;ENSG00000165995.21;ENSG00000165995.21;ENSG00000165995.21;ENSG00000165995.21;ENSG00000165995.21;ENSG00000165995.21;ENSG00000165995.21;ENSG00000165995.21;ENSG00000165995.21;ENSG00000165995.21;ENSG00000165995.21;ENSG00000165995.21;ENSG00000165995.21	protein_coding;protein_coding;protein_coding;protein_coding;protein_coding;protein_coding;protein_coding;protein_coding;protein_coding;protein_coding;protein_coding;protein_coding;protein_coding;protein_coding;protein_coding;protein_coding;protein_coding;protein_coding	2;2;2;2;3;3;3;3;2;2;2;2;3;3;2;2;2;2	14;14;14;14;6;6;13;13;13;13;13;13;12;12;13;13;13;13	CACNB2-202;CACNB2-202;CACNB2-201;CACNB2-201;CACNB2-215;CACNB2-215;CACNB2-216;CACNB2-216;CACNB2-209;CACNB2-209;CACNB2-207;CACNB2-207;CACNB2-213;CACNB2-213;CACNB2-227;CACNB2-227;CACNB2-222;CACNB2-222	1;1;1;1;5;5;5;5;1;1;1;1;5;5;None;None;None;None
10	18539759	exon;three_prime_UTR;exon;three_prime_UTR;exon;three_prime_UTR;exon;three_prime_UTR;exon;three_prime_UTR;exon;three_prime_UTR;exon;three_prime_UTR;exon;three_prime_UTR;exon;three_prime_UTR	18539230;18539725;18539230;18539725;18539230;18539725;18539230;18539725;18539230;18539725;18539230;18539725;18539230;18539230;18539230;18539725;18539230;18539725	18543557;18543557;18540763;18540763;18541862;18541862;18541862;18541862;18541869;18541869;18541109;18541109;18541862;18541862;18540275;18540275;18540600;18540600	+;+;+;+;+;+;+;+;+;+;+;+;+;+;+;+;+;+	CACNB2;CACNB2;CACNB2;CACNB2;CACNB2;CACNB2;CACNB2;CACNB2;CACNB2;CACNB2;CACNB2;CACNB2;CACNB2;CACNB2;CACNB2;CACNB2;CACNB2;CACNB2	ENSG00000165995.21;ENSG00000165995.21;ENSG00000165995.21;ENSG00000165995.21;ENSG00000165995.21;ENSG00000165995.21;ENSG00000165995.21;ENSG00000165995.21;ENSG00000165995.21;ENSG00000165995.21;ENSG00000165995.21;ENSG00000165995.21;ENSG00000165995.21;ENSG00000165995.21;ENSG00000165995.21;ENSG00000165995.21;ENSG00000165995.21;ENSG00000165995.21	protein_coding;protein_coding;protein_coding;protein_coding;protein_coding;protein_coding;protein_coding;protein_coding;protein_coding;protein_coding;protein_coding;protein_coding;protein_coding;protein_coding;protein_coding;protein_coding;protein_coding;protein_coding	2;2;2;2;3;3;3;3;2;2;2;2;3;3;2;2;2;2	14;14;14;14;6;6;13;13;13;13;13;13;12;12;13;13;13;13	CACNB2-202;CACNB2-202;CACNB2-201;CACNB2-201;CACNB2-215;CACNB2-215;CACNB2-216;CACNB2-216;CACNB2-209;CACNB2-209;CACNB2-207;CACNB2-207;CACNB2-213;CACNB2-213;CACNB2-227;CACNB2-227;CACNB2-222;CACNB2-222	1;1;1;1;5;5;5;5;1;1;1;1;5;5;None;None;None;None
10	19607780	exon;CDS	19607777;19607777	19607902;19607902	+;+	MALRD1;MALRD1	ENSG00000204740.11;ENSG00000204740.11	protein_coding;protein_coding	2;2	35;35	MALRD1-204;MALRD1-204	1;1
10	22413066	exon	22412849	22413067	+	AL513128.1	ENSG00000233451.1	lncRNA	2	2	AL513128.1-201	5
10	23001932	exon;CDS;exon;CDS;exon;CDS;exon;CDS	23001919;23001919;23001919;23001919;23001919;23001919;23001919;23001919	23002055;23002055;23002055;23002055;23002055;23002055;23002055;23002055	+;+;+;+;+;+;+;+	ARMC3;ARMC3;ARMC3;ARMC3;ARMC3;ARMC3;ARMC3;ARMC3	ENSG00000165309.14;ENSG00000165309.14;ENSG00000165309.14;ENSG00000165309.14;ENSG00000165309.14;ENSG00000165309.14;ENSG00000165309.14;ENSG00000165309.14	protein_coding;protein_coding;protein_coding;protein_coding;protein_coding;protein_coding;protein_coding;protein_coding	3;3;2;2;2;2;2;2	9;9;12;12;12;12;12;12	ARMC3-202;ARMC3-202;ARMC3-204;ARMC3-204;ARMC3-201;ARMC3-201;ARMC3-203;ARMC3-203	2;2;2;2;1;1;1;1
10	23094910	exon	23094820	23095189	-	AL139815.1	ENSG00000286924.1	lncRNA	2	1	AL139815.1-203	None
10	24411296	exon	24410183	24412818	-	AL356113.1	ENSG00000286951.1	lncRNA	2	2	AL356113.1-201	None
10	24411583	exon	24410183	24412818	-	AL356113.1	ENSG00000286951.1	lncRNA	2	2	AL356113.1-201	None
10	254268	exon;three_prime_UTR;exon;three_prime_UTR;exon;three_prime_UTR;exon;three_prime_UTR;exon;three_prime_UTR;exon;three_prime_UTR;exon;three_prime_UTR;exon;three_prime_UTR	252348;252471;252348;252471;252348;252471;252348;252471;252348;252471;252348;252471;252348;252471;252348;252471	254626;254626;254626;254626;254637;254637;254637;254637;254431;254431;254626;254626;254613;254613;254634;254634	+;+;+;+;+;+;+;+;+;+;+;+;+;+;+;+	ZMYND11;ZMYND11;ZMYND11;ZMYND11;ZMYND11;ZMYND11;ZMYND11;ZMYND11;ZMYND11;ZMYND11;ZMYND11;ZMYND11;ZMYND11;ZMYND11;ZMYND11;ZMYND11	ENSG00000015171.20;ENSG00000015171.20;ENSG00000015171.20;ENSG00000015171.20;ENSG00000015171.20;ENSG00000015171.20;ENSG00000015171.20;ENSG00000015171.20;ENSG00000015171.20;ENSG00000015171.20;ENSG00000015171.20;ENSG00000015171.20;ENSG00000015171.20;ENSG00000015171.20;ENSG00000015171.20;ENSG00000015171.20	protein_coding;protein_coding;protein_coding;protein_coding;protein_coding;protein_coding;protein_coding;protein_coding;protein_coding;protein_coding;protein_coding;protein_coding;protein_coding;protein_coding;protein_coding;protein_coding	3;3;3;3;2;2;2;2;2;2;3;3;2;2;2;2	14;14;13;13;15;15;15;15;13;13;14;14;15;15;14;14	ZMYND11-201;ZMYND11-201;ZMYND11-207;ZMYND11-207;ZMYND11-203;ZMYND11-203;ZMYND11-204;ZMYND11-204;ZMYND11-216;ZMYND11-216;ZMYND11-205;ZMYND11-205;ZMYND11-217;ZMYND11-217;ZMYND11-209;ZMYND11-209	2;2;2;2;5;5;5;5;5;5;1;1;5;5;5;5
10	25731860	exon;exon;exon;exon;exon	25731621;25731621;25731621;25731621;25731621	25732741;25732741;25732774;25732820;25732765	+;+;+;+;+	LINC00836;LINC00836;LINC00836;LINC00836;LINC00836	ENSG00000280809.4;ENSG00000280809.4;ENSG00000280809.4;ENSG00000280809.4;ENSG00000280809.4	lncRNA;lncRNA;lncRNA;lncRNA;lncRNA	2;2;2;2;2	6;7;8;4;2	LINC00836-209;LINC00836-208;LINC00836-205;LINC00836-206;LINC00836-218	None;None;None;None;None
10	26567666	exon;three_prime_UTR	26566961;26567489	26567803;26567803	+;+	APBB1IP;APBB1IP	ENSG00000077420.16;ENSG00000077420.16	protein_coding;protein_coding	2;2	15;15	APBB1IP-202;APBB1IP-202	5;5
10	26695591	exon	26695091	26697625	-	AL390961.3	ENSG00000279212.1	TEC	2	1	AL390961.3-201	NA
10	26937851	exon	26936737	26937859	-	FAM238C	ENSG00000283709.1	transcribed_unprocessed_pseudogene	2	1	FAM238C-202	2
10	27005081	exon;three_prime_UTR	27004116;27004116	27005723;27005589	-;-	ANKRD26;ANKRD26	ENSG00000107890.17;ENSG00000107890.17	protein_coding;protein_coding	2;2	34;34	ANKRD26-201;ANKRD26-201	5;5
10	27154516	exon;five_prime_UTR	27154178;27154211	27155266;27155266	-;-	YME1L1;YME1L1	ENSG00000136758.19;ENSG00000136758.19	protein_coding;protein_coding	2;2	1;1	YME1L1-207;YME1L1-207	1;1
10	27195477	three_prime_UTR;three_prime_UTR;three_prime_UTR;three_prime_UTR;exon;exon;exon;exon	27195214;27195215;27195217;27195217;27195214;27195215;27195217;27195217	27197429;27197429;27197429;27197429;27197442;27197442;27197442;27197442	-;-;-;-;-;-;-;-	ACBD5;ACBD5;ACBD5;ACBD5;ACBD5;ACBD5;ACBD5;ACBD5	ENSG00000107897.19;ENSG00000107897.19;ENSG00000107897.19;ENSG00000107897.19;ENSG00000107897.19;ENSG00000107897.19;ENSG00000107897.19;ENSG00000107897.19	protein_coding;protein_coding;protein_coding;protein_coding;protein_coding;protein_coding;protein_coding;protein_coding	2;3;2;2;2;3;2;2	13;12;12;13;13;12;12;13	ACBD5-205;ACBD5-202;ACBD5-203;ACBD5-204;ACBD5-205;ACBD5-202;ACBD5-203;ACBD5-204	1;2;1;2;1;2;1;2
10	27344910	exon	27344739	27344917	+	LINC02673	ENSG00000260151.1	lncRNA	2	2	LINC02673-201	1
10	27533823	exon;CDS;exon;CDS;exon;CDS;exon;CDS	27533735;27533735;27533735;27533735;27533735;27533735;27533735;27533735	27533853;27533853;27533853;27533853;27533853;27533853;27533853;27533853	+;+;+;+;+;+;+;+	RAB18;RAB18;RAB18;RAB18;RAB18;RAB18;RAB18;RAB18	ENSG00000099246.17;ENSG00000099246.17;ENSG00000099246.17;ENSG00000099246.17;ENSG00000099246.17;ENSG00000099246.17;ENSG00000099246.17;ENSG00000099246.17	protein_coding;protein_coding;protein_coding;protein_coding;protein_coding;protein_coding;protein_coding;protein_coding	3;3;2;2;2;2;3;3	4;4;5;5;3;3;6;6	RAB18-208;RAB18-208;RAB18-201;RAB18-201;RAB18-202;RAB18-202;RAB18-209;RAB18-209	5;5;1;1;5;5;1;1
10	28622432	exon;three_prime_UTR;exon;three_prime_UTR	28619537;28619607;28619537;28619607	28623112;28623112;28623112;28623112	+;+;+;+	WAC;WAC;WAC;WAC	ENSG00000095787.23;ENSG00000095787.23;ENSG00000095787.23;ENSG00000095787.23	protein_coding;protein_coding;protein_coding;protein_coding	1;1;1;1	14;14;14;14	WAC-205;WAC-205;WAC-203;WAC-203	1;1;1;1
10	30450257	exon;CDS;exon;CDS;exon;CDS	30450258;30450258;30450258;30450258;30450258;30450258	30450519;30450519;30450519;30450519;30450519;30450519	+;+;+;+;+;+	MAP3K8;MAP3K8;MAP3K8;MAP3K8;MAP3K8;MAP3K8	ENSG00000107968.10;ENSG00000107968.10;ENSG00000107968.10;ENSG00000107968.10;ENSG00000107968.10;ENSG00000107968.10	protein_coding;protein_coding;protein_coding;protein_coding;protein_coding;protein_coding	3;3;2;2;2;2	4;4;5;5;3;3	MAP3K8-207;MAP3K8-207;MAP3K8-201;MAP3K8-201;MAP3K8-202;MAP3K8-202	1;1;1;1;1;1
10	3488252	exon;exon	3487332;3487551	3488352;3488352	-;-	LINC02669;LINC02669	ENSG00000233321.2;ENSG00000233321.2	lncRNA;lncRNA	2;2	4;5	LINC02669-218;LINC02669-212	None;None
10	34975040	exon	34974658	34975578	+	LINC02635	ENSG00000283000.2	lncRNA	2	3	LINC02635-202	5
10	35778386	exon	35778302	35778515	+	PCAT5	ENSG00000280719.1	lncRNA	2	1	PCAT5-201	1
10	37830228	exon;three_prime_UTR;exon;three_prime_UTR;exon;three_prime_UTR	37828765;37828765;37828765;37828765;37828765;37828765	37833116;37831614;37831312;37831282;37833116;37831614	-;-;-;-;-;-	ZNF248;ZNF248;ZNF248;ZNF248;ZNF248;ZNF248	ENSG00000198105.15;ENSG00000198105.15;ENSG00000198105.15;ENSG00000198105.15;ENSG00000198105.15;ENSG00000198105.15	protein_coding;protein_coding;protein_coding;protein_coding;protein_coding;protein_coding	2;2;3;3;3;3	6;6;5;5;6;6	ZNF248-203;ZNF248-203;ZNF248-208;ZNF248-208;ZNF248-201;ZNF248-201	1;1;1;1;2;2
10	4051821	exon	4051726	4052157	+	AC025822.2	ENSG00000236990.1	lncRNA	2	1	AC025822.2-201	2
10	42579780	exon	42579724	42579858	+	AL022345.1	ENSG00000272319.2	unprocessed_pseudogene	2	1	AL022345.1-201	NA
10	42673318	exon	42673015	42674357	-	LINC01518	ENSG00000233515.2	lncRNA	2	4	LINC01518-203	None
10	43616854	exon;CDS;exon;CDS	43616291;43616291;43616291;43616291	43617903;43617369;43617904;43617369	+;+;+;+	ZNF485;ZNF485;ZNF485;ZNF485	ENSG00000198298.13;ENSG00000198298.13;ENSG00000198298.13;ENSG00000198298.13	protein_coding;protein_coding;protein_coding;protein_coding	2;2;2;2	5;5;5;5	ZNF485-202;ZNF485-202;ZNF485-201;ZNF485-201	1;1;1;1
10	44515411	exon	44515069	44515421	+	AL356157.3	ENSG00000287173.1	lncRNA	2	3	AL356157.3-201	None
10	44999843	exon	44997698	45000416	-	ZNF22-AS1	ENSG00000165511.6	lncRNA	2	2	ZNF22-AS1-201	1
10	45454745	exon;three_prime_UTR;exon;three_prime_UTR	45454585;45454585;45454593;45454593	45458543;45458238;45458543;45458238	-;-;-;-	MARCHF8;MARCHF8;MARCHF8;MARCHF8	ENSG00000165406.16;ENSG00000165406.16;ENSG00000165406.16;ENSG00000165406.16	protein_coding;protein_coding;protein_coding;protein_coding	2;2;3;3	8;8;7;7	MARCHF8-204;MARCHF8-204;MARCHF8-201;MARCHF8-201	1;1;1;1
10	45454757	exon;three_prime_UTR;exon;three_prime_UTR	45454585;45454585;45454593;45454593	45458543;45458238;45458543;45458238	-;-;-;-	MARCHF8;MARCHF8;MARCHF8;MARCHF8	ENSG00000165406.16;ENSG00000165406.16;ENSG00000165406.16;ENSG00000165406.16	protein_coding;protein_coding;protein_coding;protein_coding	2;2;3;3	8;8;7;7	MARCHF8-204;MARCHF8-204;MARCHF8-201;MARCHF8-201	1;1;1;1
10	46651121	exon	46650447	46652025	-	SHLD2P1	ENSG00000165874.13	transcribed_unprocessed_pseudogene	1	1	SHLD2P1-202	NA
10	49326924	exon;three_prime_UTR	49322402;49326854	49327492;49327492	+;+	C10orf71;C10orf71	ENSG00000177354.12;ENSG00000177354.12	protein_coding;protein_coding	2;2	3;3	C10orf71-201;C10orf71-201	1;1
10	4989661	exon;three_prime_UTR;exon;three_prime_UTR	4987400;4987400;4989434;4989434	4990038;4989995;4990038;4989995	-;-;-;-	AKR1C2;AKR1C2;AKR1C2;AKR1C2	ENSG00000151632.17;ENSG00000151632.17;ENSG00000151632.17;ENSG00000151632.17	protein_coding;protein_coding;protein_coding;protein_coding	2;2;2;2	9;9;8;8	AKR1C2-201;AKR1C2-201;AKR1C2-202;AKR1C2-202	1;1;1;1
10	50104122	exon;CDS;exon;CDS;exon;CDS;exon;CDS;exon;CDS	50104042;50104042;50104042;50104042;50104042;50104042;50104042;50104042;50104042;50104042	50104143;50104143;50104143;50104143;50104143;50104143;50104143;50104143;50104143;50104143	+;+;+;+;+;+;+;+;+;+	WASHC2A;WASHC2A;WASHC2A;WASHC2A;WASHC2A;WASHC2A;WASHC2A;WASHC2A;WASHC2A;WASHC2A	ENSG00000099290.17;ENSG00000099290.17;ENSG00000099290.17;ENSG00000099290.17;ENSG00000099290.17;ENSG00000099290.17;ENSG00000099290.17;ENSG00000099290.17;ENSG00000099290.17;ENSG00000099290.17	protein_coding;protein_coding;protein_coding;protein_coding;protein_coding;protein_coding;protein_coding;protein_coding;protein_coding;protein_coding	3;3;2;2;2;2;2;2;3;3	17;17;18;18;18;18;18;18;16;16	WASHC2A-209;WASHC2A-209;WASHC2A-203;WASHC2A-203;WASHC2A-202;WASHC2A-202;WASHC2A-201;WASHC2A-201;WASHC2A-204;WASHC2A-204	2;2;1;1;1;1;1;1;5;5
10	50265032	exon	50264978	50266815	+	DYNC1I2P1	ENSG00000225137.1	processed_pseudogene	1	1	DYNC1I2P1-201	NA
10	50634788	exon	50629577	50641451	+	SGMS1-AS1	ENSG00000226200.7	lncRNA	2	4	SGMS1-AS1-201	4
10	50637151	exon	50629577	50641451	+	SGMS1-AS1	ENSG00000226200.7	lncRNA	2	4	SGMS1-AS1-201	4
10	52412620	exon	52411437	52413492	+	THAP12P3	ENSG00000227972.1	processed_pseudogene	1	2	THAP12P3-201	NA
10	52952234	exon	52946431	52952970	-	AC073174.1	ENSG00000285958.1	lncRNA	2	2	AC073174.1-201	None
10	56361746	exon	56361479	56361856	+	AC010996.1	ENSG00000287016.1	lncRNA	2	1	AC010996.1-201	None
10	58191599	exon;three_prime_UTR	58191517;58191517	58196698;58196075	-;-	IPMK;IPMK	ENSG00000151151.6;ENSG00000151151.6	protein_coding;protein_coding	2;2	6;6	IPMK-201;IPMK-201	1;1
10	59652509	exon;three_prime_UTR;exon;three_prime_UTR	59650761;59650761;59650765;59650765	59652950;59652771;59652950;59652771	-;-;-;-	SLC16A9;SLC16A9;SLC16A9;SLC16A9	ENSG00000165449.11;ENSG00000165449.11;ENSG00000165449.11;ENSG00000165449.11	protein_coding;protein_coding;protein_coding;protein_coding	2;2;2;2	6;6;6;6	SLC16A9-202;SLC16A9-202;SLC16A9-201;SLC16A9-201	5;5;2;2
10	6116036	exon;three_prime_UTR;exon;three_prime_UTR	6115453;6115557;6115453;6115557	6117447;6117447;6117457;6117457	+;+;+;+	RBM17;RBM17;RBM17;RBM17	ENSG00000134453.16;ENSG00000134453.16;ENSG00000134453.16;ENSG00000134453.16	protein_coding;protein_coding;protein_coding;protein_coding	2;2;3;3	12;12;12;12	RBM17-201;RBM17-201;RBM17-205;RBM17-205	1;1;1;1
10	61681182	exon;CDS;exon;five_prime_UTR	61681143;61681143;61681143;61681143	61681312;61681312;61681312;61681242	+;+;+;+	CABCOCO1;CABCOCO1;CABCOCO1;CABCOCO1	ENSG00000183346.8;ENSG00000183346.8;ENSG00000183346.8;ENSG00000183346.8	protein_coding;protein_coding;protein_coding;protein_coding	2;2;2;2	3;3;2;2	CABCOCO1-203;CABCOCO1-203;CABCOCO1-201;CABCOCO1-201	None;None;1;1
10	62196628	exon;three_prime_UTR	62193086;62193086	62198443;62197907	-;-	RTKN2;RTKN2	ENSG00000182010.11;ENSG00000182010.11	protein_coding;protein_coding	2;2	12;12	RTKN2-202;RTKN2-202	1;1
10	630358	exon	629859	631255	+	AL358216.1	ENSG00000225140.1	lncRNA	1	2	AL358216.1-201	1
10	65671245	exon	65670689	65672091	+	LINC01515	ENSG00000228065.11	lncRNA	2	7	LINC01515-225	None
10	6616320	exon	6616006	6616921	+	PRKCQ-AS1	ENSG00000237943.7	lncRNA	2	8	PRKCQ-AS1-214	5
10	67055007	exon	67054616	67055028	+	AL139240.1	ENSG00000225299.1	lncRNA	1	2	AL139240.1-201	2
10	67916856	exon;three_prime_UTR;exon;three_prime_UTR;exon;three_prime_UTR;exon;three_prime_UTR	67916265;67916594;67916265;67916594;67916265;67916594;67916265;67916594	67918390;67918390;67918389;67918389;67918390;67918390;67918386;67918386	+;+;+;+;+;+;+;+	SIRT1;SIRT1;SIRT1;SIRT1;SIRT1;SIRT1;SIRT1;SIRT1	ENSG00000096717.12;ENSG00000096717.12;ENSG00000096717.12;ENSG00000096717.12;ENSG00000096717.12;ENSG00000096717.12;ENSG00000096717.12;ENSG00000096717.12	protein_coding;protein_coding;protein_coding;protein_coding;protein_coding;protein_coding;protein_coding;protein_coding	2;2;3;3;2;2;2;2	9;9;8;8;7;7;6;6	SIRT1-201;SIRT1-201;SIRT1-204;SIRT1-204;SIRT1-203;SIRT1-203;SIRT1-202;SIRT1-202	1;1;5;5;2;2;1;1
10	6827384	exon	6826938	6828012	-	AL392086.3	ENSG00000287277.1	lncRNA	2	1	AL392086.3-204	None
10	68480409	exon;three_prime_UTR	68477998;68477998	68483588;68483431	-;-	SLC25A16;SLC25A16	ENSG00000122912.15;ENSG00000122912.15	protein_coding;protein_coding	2;2	9;9	SLC25A16-207;SLC25A16-207	1;1
10	6877673	exon;exon	6877276;6877276	6879450;6877888	+;+	LINC00707;AL392086.1	ENSG00000238266.2;ENSG00000285845.1	lncRNA;lncRNA	2;2	2;6	LINC00707-208;AL392086.1-201	None;None
10	69104320	exon;three_prime_UTR	69103871;69104121	69104805;69104805	+;+	SRGN;SRGN	ENSG00000122862.5;ENSG00000122862.5	protein_coding;protein_coding	2;2	3;3	SRGN-201;SRGN-201	1;1
10	69209061	exon;three_prime_UTR	69208600;69209036	69209093;69209093	+;+	SUPV3L1;SUPV3L1	ENSG00000156502.14;ENSG00000156502.14	protein_coding;protein_coding	2;2	15;15	SUPV3L1-201;SUPV3L1-201	1;1
10	69215654	exon	69215333	69216772	-	AL596223.1	ENSG00000229261.1	lncRNA	2	5	AL596223.1-201	2
10	69507651	exon;three_prime_UTR	69506829;69506979	69507666;69507666	+;+	TSPAN15;TSPAN15	ENSG00000099282.10;ENSG00000099282.10	protein_coding;protein_coding	2;2	8;8	TSPAN15-201;TSPAN15-201	1;1
10	69778992	exon	69778962	69779838	+	RPL5P26	ENSG00000230469.1	processed_pseudogene	1	1	RPL5P26-201	NA
10	70137988	exon;three_prime_UTR;exon;three_prime_UTR	70137981;70137981;70137981;70137981	70140141;70140110;70140141;70139923	-;-;-;-	TYSND1;TYSND1;TYSND1;TYSND1	ENSG00000156521.14;ENSG00000156521.14;ENSG00000156521.14;ENSG00000156521.14	protein_coding;protein_coding;protein_coding;protein_coding	2;2;2;2	2;2;4;4	TYSND1-202;TYSND1-202;TYSND1-201;TYSND1-201	1;1;1;1
10	70151259	exon;three_prime_UTR;exon;three_prime_UTR;exon;three_prime_UTR;exon;three_prime_UTR	70147289;70147289;70147289;70147289;70150204;70150204;70150223;70150223	70152592;70152475;70152592;70152475;70152592;70152475;70151378;70151378	-;-;-;-;-;-;-;-	SAR1A;SAR1A;SAR1A;SAR1A;SAR1A;SAR1A;SAR1A;SAR1A	ENSG00000079332.15;ENSG00000079332.15;ENSG00000079332.15;ENSG00000079332.15;ENSG00000079332.15;ENSG00000079332.15;ENSG00000079332.15;ENSG00000079332.15	protein_coding;protein_coding;protein_coding;protein_coding;protein_coding;protein_coding;protein_coding;protein_coding	2;2;2;2;2;2;3;3	7;7;8;8;7;7;7;7	SAR1A-204;SAR1A-204;SAR1A-205;SAR1A-205;SAR1A-202;SAR1A-202;SAR1A-206;SAR1A-206	1;1;2;2;2;2;1;1
10	70151284	exon;three_prime_UTR;exon;three_prime_UTR;exon;three_prime_UTR;exon;three_prime_UTR	70147289;70147289;70147289;70147289;70150204;70150204;70150223;70150223	70152592;70152475;70152592;70152475;70152592;70152475;70151378;70151378	-;-;-;-;-;-;-;-	SAR1A;SAR1A;SAR1A;SAR1A;SAR1A;SAR1A;SAR1A;SAR1A	ENSG00000079332.15;ENSG00000079332.15;ENSG00000079332.15;ENSG00000079332.15;ENSG00000079332.15;ENSG00000079332.15;ENSG00000079332.15;ENSG00000079332.15	protein_coding;protein_coding;protein_coding;protein_coding;protein_coding;protein_coding;protein_coding;protein_coding	2;2;2;2;2;2;3;3	7;7;8;8;7;7;7;7	SAR1A-204;SAR1A-204;SAR1A-205;SAR1A-205;SAR1A-202;SAR1A-202;SAR1A-206;SAR1A-206	1;1;2;2;2;2;1;1
10	70157696	exon;three_prime_UTR	70157675;70157675	70157867;70157745	-;-	SAR1A;SAR1A	ENSG00000079332.15;ENSG00000079332.15	protein_coding;protein_coding	2;2	4;4	SAR1A-201;SAR1A-201	1;1
10	70217901	exon;CDS;exon;CDS	70217812;70217812;70217812;70217812	70217931;70217931;70217931;70217931	-;-;-;-	PPA1;PPA1;PPA1;PPA1	ENSG00000180817.12;ENSG00000180817.12;ENSG00000180817.12;ENSG00000180817.12	protein_coding;protein_coding;protein_coding;protein_coding	2;2;3;3	4;4;4;4	PPA1-202;PPA1-202;PPA1-206;PPA1-206	1;1;5;5
10	70390270	exon	70389426	70390626	+	CEP57L1P1	ENSG00000224725.3	processed_pseudogene	1	1	CEP57L1P1-201	NA
10	70390360	exon	70389426	70390626	+	CEP57L1P1	ENSG00000224725.3	processed_pseudogene	1	1	CEP57L1P1-201	NA
10	71815509	exon;three_prime_UTR;exon;three_prime_UTR;exon;three_prime_UTR;exon;three_prime_UTR	71814952;71815279;71814952;71815279;71814952;71815279;71814952;71815279	71815947;71815947;71815945;71815945;71815945;71815945;71815945;71815945	+;+;+;+;+;+;+;+	CDH23;CDH23;CDH23;CDH23;CDH23;CDH23;CDH23;CDH23	ENSG00000107736.21;ENSG00000107736.21;ENSG00000107736.21;ENSG00000107736.21;ENSG00000107736.21;ENSG00000107736.21;ENSG00000107736.21;ENSG00000107736.21	protein_coding;protein_coding;protein_coding;protein_coding;protein_coding;protein_coding;protein_coding;protein_coding	1;1;3;3;3;3;3;3	70;70;68;68;22;22;23;23	CDH23-201;CDH23-201;CDH23-214;CDH23-214;CDH23-213;CDH23-213;CDH23-203;CDH23-203	5;5;5;5;1;1;1;1
10	72233530	exon;three_prime_UTR;exon;three_prime_UTR;exon;three_prime_UTR	72233001;72233117;72233001;72233117;72233001;72233117	72235858;72235858;72235858;72235858;72235860;72235860	+;+;+;+;+;+	ANAPC16;ANAPC16;ANAPC16;ANAPC16;ANAPC16;ANAPC16	ENSG00000166295.9;ENSG00000166295.9;ENSG00000166295.9;ENSG00000166295.9;ENSG00000166295.9;ENSG00000166295.9	protein_coding;protein_coding;protein_coding;protein_coding;protein_coding;protein_coding	3;3;3;3;2;2	3;3;5;5;4;4	ANAPC16-204;ANAPC16-204;ANAPC16-205;ANAPC16-205;ANAPC16-201;ANAPC16-201	3;3;3;3;1;1
10	73444473	exon;three_prime_UTR	73443780;73443780	73444822;73444599	-;-	PPP3CB;PPP3CB	ENSG00000107758.16;ENSG00000107758.16	protein_coding;protein_coding	2;2	12;12	PPP3CB-201;PPP3CB-201	5;5
10	73537902	exon	73537803	73537917	+	RPS26P41	ENSG00000237139.1	processed_pseudogene	1	1	RPS26P41-201	NA
10	75400095	exon;CDS	75397830;75398749	75400374;75400374	-;-	ZNF503;ZNF503	ENSG00000165655.17;ENSG00000165655.17	protein_coding;protein_coding	2;2	2;2	ZNF503-201;ZNF503-201	1;1
10	75628085	exon	75627391	75628120	+	AL589863.2	ENSG00000286715.1	lncRNA	2	2	AL589863.2-201	None
10	77733927	exon	77731770	77734769	+	AL731556.1	ENSG00000213514.2	processed_pseudogene	2	2	AL731556.1-201	NA
10	79556121	exon;three_prime_UTR	79555852;79555852	79557585;79557208	-;-	SFTPA2;SFTPA2	ENSG00000185303.17;ENSG00000185303.17	protein_coding;protein_coding	2;2	6;6	SFTPA2-201;SFTPA2-201	1;1
10	83708945	exon	83708841	83710875	-	AC069540.2	ENSG00000286876.1	lncRNA	2	3	AC069540.2-201	None
10	85602284	exon;CDS	85599552;85602273	85602701;85602701	-;-	GRID1;GRID1	ENSG00000182771.19;ENSG00000182771.19	protein_coding;protein_coding	2;2	16;16	GRID1-201;GRID1-201	2;2
10	85647023	exon	85645564	85648066	+	AC022028.2	ENSG00000270002.1	lncRNA	2	2	AC022028.2-201	2
10	86403129	exon	86403090	86403201	-	AL844892.1	ENSG00000286359.1	lncRNA	2	1	AL844892.1-201	None
10	86733348	exon;three_prime_UTR;exon;three_prime_UTR	86732887;86732977;86732887;86732977	86736072;86736072;86736072;86736072	+;+;+;+	LDB3;LDB3;LDB3;LDB3	ENSG00000122367.20;ENSG00000122367.20;ENSG00000122367.20;ENSG00000122367.20	protein_coding;protein_coding;protein_coding;protein_coding	2;2;2;2	14;14;14;14	LDB3-205;LDB3-205;LDB3-202;LDB3-202	2;2;1;1
10	86753670	exon	86749754	86756298	-	AC067750.1	ENSG00000272631.1	lncRNA	2	1	AC067750.1-201	NA
10	87332972	exon	87331962	87334814	-	NUTM2A-AS1	ENSG00000223482.8	lncRNA	2	3	NUTM2A-AS1-222	None
10	87860729	exon;three_prime_UTR	87859158;87859158	87863437;87861950	-;-	KLLN;KLLN	ENSG00000227268.4;ENSG00000227268.4	protein_coding;protein_coding	2;2	1;1	KLLN-201;KLLN-201	NA;NA
10	88728139	exon	88727485	88728914	+	KRT8P38	ENSG00000226358.1	processed_pseudogene	1	1	KRT8P38-201	NA
10	88813241	exon;CDS;exon;CDS	88813097;88813097;88813097;88813097	88813295;88813295;88813295;88813295	+;+;+;+	LIPM;LIPM;LIPM;LIPM	ENSG00000173239.14;ENSG00000173239.14;ENSG00000173239.14;ENSG00000173239.14	protein_coding;protein_coding;protein_coding;protein_coding	2;2;3;3	3;3;3;3	LIPM-201;LIPM-201;LIPM-202;LIPM-202	1;1;2;2
10	88913210	exon;CDS;exon;CDS;exon;CDS	88913101;88913101;88913101;88913101;88913101;88913101	88913458;88913458;88913458;88913458;88913458;88913458	+;+;+;+;+;+	STAMBPL1;STAMBPL1;STAMBPL1;STAMBPL1;STAMBPL1;STAMBPL1	ENSG00000138134.12;ENSG00000138134.12;ENSG00000138134.12;ENSG00000138134.12;ENSG00000138134.12;ENSG00000138134.12	protein_coding;protein_coding;protein_coding;protein_coding;protein_coding;protein_coding	2;2;2;2;2;2	6;6;6;6;5;5	STAMBPL1-204;STAMBPL1-204;STAMBPL1-203;STAMBPL1-203;STAMBPL1-202;STAMBPL1-202	2;2;1;1;1;1
10	88974477	exon;three_prime_UTR	88973182;88973314	88975153;88975153	+;+	STAMBPL1;STAMBPL1	ENSG00000138134.12;ENSG00000138134.12	protein_coding;protein_coding	2;2	11;11	STAMBPL1-204;STAMBPL1-204	2;2
10	89403540	exon;CDS;exon;CDS	89402281;89402369;89402281;89402281	89406486;89403712;89406487;89403712	+;+;+;+	IFIT1;IFIT1;IFIT1;IFIT1	ENSG00000185745.10;ENSG00000185745.10;ENSG00000185745.10;ENSG00000185745.10	protein_coding;protein_coding;protein_coding;protein_coding	3;3;2;2	3;3;2;2	IFIT1-202;IFIT1-202;IFIT1-201;IFIT1-201	3;3;1;1
10	89582611	exon;three_prime_UTR	89579497;89579497	89584465;89584405	-;-	PANK1;PANK1	ENSG00000152782.16;ENSG00000152782.16	protein_coding;protein_coding	3;3	7;7	PANK1-201;PANK1-201	1;1
10	89582658	exon;three_prime_UTR	89579497;89579497	89584465;89584405	-;-	PANK1;PANK1	ENSG00000152782.16;ENSG00000152782.16	protein_coding;protein_coding	3;3	7;7	PANK1-201;PANK1-201	1;1
10	89754608	exon;CDS;exon;CDS	89754518;89754518;89754518;89754518	89754673;89754673;89754673;89754673	+;+;+;+	KIF20B;KIF20B;KIF20B;KIF20B	ENSG00000138182.14;ENSG00000138182.14;ENSG00000138182.14;ENSG00000138182.14	protein_coding;protein_coding;protein_coding;protein_coding	2;2;2;2	26;26;26;26	KIF20B-201;KIF20B-201;KIF20B-202;KIF20B-202	1;1;1;1
10	89758870	exon;CDS;exon;CDS	89758706;89758706;89758706;89758706	89758882;89758882;89758882;89758882	+;+;+;+	KIF20B;KIF20B;KIF20B;KIF20B	ENSG00000138182.14;ENSG00000138182.14;ENSG00000138182.14;ENSG00000138182.14	protein_coding;protein_coding;protein_coding;protein_coding	2;2;2;2	27;27;27;27	KIF20B-201;KIF20B-201;KIF20B-202;KIF20B-202	1;1;1;1
10	92900203	exon;three_prime_UTR	92899599;92899649	92901851;92901851	+;+	EXOC6;EXOC6	ENSG00000138190.17;ENSG00000138190.17	protein_coding;protein_coding	2;2	5;5	EXOC6-202;EXOC6-202	2;2
10	93764764	exon	93762453	93765689	+	AL157396.1	ENSG00000280660.1	lncRNA	2	1	AL157396.1-201	1
10	94330119	exon;three_prime_UTR	94327968;94327968	94332823;94332823	+;+	PLCE1;PLCE1	ENSG00000138193.16;ENSG00000138193.16	protein_coding;protein_coding	2;2	33;33	PLCE1-202;PLCE1-202	1;1
10	94706873	exon;CDS;exon;CDS	94706784;94706784;94706784;94706784	94706960;94706960;94706960;94706960	+;+;+;+	CYP2C18;CYP2C18;AL583836.1;AL583836.1	ENSG00000108242.13;ENSG00000108242.13;ENSG00000276490.1;ENSG00000276490.1	protein_coding;protein_coding;protein_coding;protein_coding	2;2;2;2	5;5;3;3	CYP2C18-201;CYP2C18-201;AL583836.1-201;AL583836.1-201	1;1;2;2
10	94986140	exon;CDS	94986033;94986033	94986174;94986174	+;+	CYP2C9;CYP2C9	ENSG00000138109.11;ENSG00000138109.11	protein_coding;protein_coding	2;2	8;8	CYP2C9-201;CYP2C9-201	1;1
10	95605964	exon;three_prime_UTR;exon;three_prime_UTR	95605941;95605941;95605945;95605945	95606943;95606761;95606943;95606761	-;-;-;-	ALDH18A1;ALDH18A1;ALDH18A1;ALDH18A1	ENSG00000059573.9;ENSG00000059573.9;ENSG00000059573.9;ENSG00000059573.9	protein_coding;protein_coding;protein_coding;protein_coding	2;2;2;2	18;18;18;18	ALDH18A1-202;ALDH18A1-202;ALDH18A1-201;ALDH18A1-201	1;1;1;1
10	95968789	exon;CDS	95968724;95968724	95968901;95968901	+;+	CC2D2B;CC2D2B	ENSG00000188649.15;ENSG00000188649.15	protein_coding;protein_coding	2;2	15;15	CC2D2B-211;CC2D2B-211	None;None
10	96364780	exon;three_prime_UTR	96364608;96364608	96368222;96368087	-;-	TLL2;TLL2	ENSG00000095587.9;ENSG00000095587.9	protein_coding;protein_coding	2;2	21;21	TLL2-201;TLL2-201	1;1
10	96446159	exon;CDS	96446091;96446091	96446168;96446168	-;-	TLL2;TLL2	ENSG00000095587.9;ENSG00000095587.9	protein_coding;protein_coding	2;2	3;3	TLL2-201;TLL2-201	1;1
10	96961948	exon;three_prime_UTR;exon;three_prime_UTR	96954953;96955923;96954953;96955923	96964441;96964441;96964441;96964441	+;+;+;+	LCOR;LCOR;LCOR;LCOR	ENSG00000196233.14;ENSG00000196233.14;ENSG00000196233.14;ENSG00000196233.14	protein_coding;protein_coding;protein_coding;protein_coding	2;2;2;2	8;8;8;8	LCOR-203;LCOR-203;LCOR-209;LCOR-209	1;1;None;None
10	96962900	exon;three_prime_UTR;exon;three_prime_UTR	96954953;96955923;96954953;96955923	96964441;96964441;96964441;96964441	+;+;+;+	LCOR;LCOR;LCOR;LCOR	ENSG00000196233.14;ENSG00000196233.14;ENSG00000196233.14;ENSG00000196233.14	protein_coding;protein_coding;protein_coding;protein_coding	2;2;2;2	8;8;8;8	LCOR-203;LCOR-203;LCOR-209;LCOR-209	1;1;None;None
10	96989715	exon;three_prime_UTR	96980793;96985135	96995956;96995956	+;+	LCOR;LCOR	ENSG00000196233.14;ENSG00000196233.14	protein_coding;protein_coding	2;2	8;8	LCOR-204;LCOR-204	3;3
10	96989851	exon;three_prime_UTR	96980793;96985135	96995956;96995956	+;+	LCOR;LCOR	ENSG00000196233.14;ENSG00000196233.14	protein_coding;protein_coding	2;2	8;8	LCOR-204;LCOR-204	3;3
10	96992316	exon;three_prime_UTR	96980793;96985135	96995956;96995956	+;+	LCOR;LCOR	ENSG00000196233.14;ENSG00000196233.14	protein_coding;protein_coding	2;2	8;8	LCOR-204;LCOR-204	3;3
10	98429371	exon;three_prime_UTR	98429151;98429151	98429642;98429534	-;-	HPS1;HPS1	ENSG00000107521.19;ENSG00000107521.19	protein_coding;protein_coding	2;2	10;10	HPS1-202;HPS1-202	1;1
10	98453768	exon	98453199	98453805	+	AL139243.1	ENSG00000287261.1	lncRNA	2	3	AL139243.1-201	None
11	100356886	exon;three_prime_UTR;exon;three_prime_UTR;exon;three_prime_UTR	100356117;100356221;100356117;100356221;100356117;100356221	100358885;100358885;100358885;100358885;100358885;100358885	+;+;+;+;+;+	CNTN5;CNTN5;CNTN5;CNTN5;CNTN5;CNTN5	ENSG00000149972.11;ENSG00000149972.11;ENSG00000149972.11;ENSG00000149972.11;ENSG00000149972.11;ENSG00000149972.11	protein_coding;protein_coding;protein_coding;protein_coding;protein_coding;protein_coding	2;2;3;3;3;3	25;25;22;22;22;22	CNTN5-204;CNTN5-204;CNTN5-201;CNTN5-201;CNTN5-212;CNTN5-212	1;1;5;5;5;5
11	101962535	exon;CDS	101961741;101961741	101963880;101963880	+;+	CEP126;CEP126	ENSG00000110318.15;ENSG00000110318.15	protein_coding;protein_coding	2;2	6;6	CEP126-201;CEP126-201	1;1
11	102617032	exon;CDS	102616812;102616812	102617059;102617059	-;-	MMP20;MMP20	ENSG00000137674.4;ENSG00000137674.4	protein_coding;protein_coding	2;2	2;2	MMP20-201;MMP20-201	1;1
11	102712361	exon;three_prime_UTR	102711796;102711796	102713457;102713347	-;-	MMP8;MMP8	ENSG00000118113.12;ENSG00000118113.12	protein_coding;protein_coding	2;2	10;10	MMP8-201;MMP8-201	1;1
11	103053120	exon;three_prime_UTR;exon	103050686;103050686;103050687	103062414;103062358;103055799	-;-;-	DCUN1D5;DCUN1D5;AP001486.2	ENSG00000137692.12;ENSG00000137692.12;ENSG00000260966.1	protein_coding;protein_coding;lncRNA	2;2;2	8;8;1	DCUN1D5-201;DCUN1D5-201;AP001486.2-201	1;1;NA
11	10306304	exon;CDS;exon;CDS	10305680;10306288;10306301;10306301	10307362;10306641;10306530;10306472	+;+;+;+	ADM;ADM;ADM;ADM	ENSG00000148926.10;ENSG00000148926.10;ENSG00000148926.10;ENSG00000148926.10	protein_coding;protein_coding;protein_coding;protein_coding	2;2;2;2	2;2;4;4	ADM-207;ADM-207;ADM-204;ADM-204	2;2;3;3
11	10450339	exon;five_prime_UTR	10450321;10450321	10450515;10450515	+;+	AMPD3;AMPD3	ENSG00000133805.15;ENSG00000133805.15	protein_coding;protein_coding	3;3	1;1	AMPD3-204;AMPD3-204	2;2
11	104572865	exon	104572076	104574300	-	LINC02552	ENSG00000256422.6	lncRNA	2	1	LINC02552-222	None
11	10764686	exon;CDS	10764548;10764548	10764731;10764731	+;+	CTR9;CTR9	ENSG00000198730.9;ENSG00000198730.9	protein_coding;protein_coding	2;2	12;12	CTR9-201;CTR9-201	1;1
11	107792161	exon;three_prime_UTR;exon;three_prime_UTR	107790991;107790991;107790991;107790991	107792800;107792614;107792793;107792658	-;-;-;-	SLC35F2;SLC35F2;SLC35F2;SLC35F2	ENSG00000110660.15;ENSG00000110660.15;ENSG00000110660.15;ENSG00000110660.15	protein_coding;protein_coding;protein_coding;protein_coding	2;2;2;2	8;8;11;11	SLC35F2-204;SLC35F2-204;SLC35F2-203;SLC35F2-203	1;1;2;2
11	108227513	exon;five_prime_UTR	108223103;108223103	108227696;108227624	+;+	ATM;ATM	ENSG00000149311.19;ENSG00000149311.19	protein_coding;protein_coding	2;2	1;1	ATM-214;ATM-214	2;2
11	108366158	exon;three_prime_UTR;exon;three_prime_UTR;exon;three_prime_UTR	108365325;108365509;108365325;108365509;108365325;108365509	108369099;108369099;108369102;108369102;108369102;108369102	+;+;+;+;+;+	ATM;ATM;ATM;ATM;ATM;ATM	ENSG00000149311.19;ENSG00000149311.19;ENSG00000149311.19;ENSG00000149311.19;ENSG00000149311.19;ENSG00000149311.19	protein_coding;protein_coding;protein_coding;protein_coding;protein_coding;protein_coding	3;3;2;2;2;2	63;63;63;63;64;64	ATM-201;ATM-201;ATM-231;ATM-231;ATM-203;ATM-203	5;5;None;None;1;1
11	10858932	exon	10858685	10859112	+	ZBED5-AS1	ENSG00000247271.7	lncRNA	2	1	ZBED5-AS1-204	None
11	108919314	exon;three_prime_UTR	108917873;108918077	108922243;108922243	+;+	DDX10;DDX10	ENSG00000178105.11;ENSG00000178105.11	protein_coding;protein_coding	2;2	17;17	DDX10-203;DDX10-203	1;1
11	109974322	exon	109972508	109975996	+	AP001981.2	ENSG00000287245.1	lncRNA	2	3	AP001981.2-201	None
11	110577471	exon;three_prime_UTR;exon;three_prime_UTR;exon;three_prime_UTR;exon;three_prime_UTR;exon;three_prime_UTR	110577042;110577042;110577054;110577054;110577054;110577054;110577054;110577054;110577054;110577054	110581225;110579369;110581225;110579369;110581225;110579369;110581225;110579369;110581225;110579369	-;-;-;-;-;-;-;-;-;-	ARHGAP20;ARHGAP20;ARHGAP20;ARHGAP20;ARHGAP20;ARHGAP20;ARHGAP20;ARHGAP20;ARHGAP20;ARHGAP20	ENSG00000137727.12;ENSG00000137727.12;ENSG00000137727.12;ENSG00000137727.12;ENSG00000137727.12;ENSG00000137727.12;ENSG00000137727.12;ENSG00000137727.12;ENSG00000137727.12;ENSG00000137727.12	protein_coding;protein_coding;protein_coding;protein_coding;protein_coding;protein_coding;protein_coding;protein_coding;protein_coding;protein_coding	2;2;2;2;2;2;2;2;2;2	16;16;15;15;15;15;16;16;15;15	ARHGAP20-201;ARHGAP20-201;ARHGAP20-202;ARHGAP20-202;ARHGAP20-204;ARHGAP20-204;ARHGAP20-206;ARHGAP20-206;ARHGAP20-203;ARHGAP20-203	1;1;1;1;1;1;1;1;1;1
11	111352992	exon;three_prime_UTR	111352255;111352255	111354575;111354260	-;-	POU2AF1;POU2AF1	ENSG00000110777.12;ENSG00000110777.12	protein_coding;protein_coding	2;2	5;5	POU2AF1-201;POU2AF1-201	1;1
11	11137440	exon	11137277	11137658	+	AC111188.1	ENSG00000254957.1	processed_pseudogene	1	2	AC111188.1-201	NA
11	111475229	exon	111475099	111475397	+	AP002008.2	ENSG00000255093.2	transcribed_unitary_pseudogene	2	7	AP002008.2-205	5
11	111739987	exon;three_prime_UTR	111737877;111737877	111741612;111741595	-;-	PPP2R1B;PPP2R1B	ENSG00000137713.16;ENSG00000137713.16	protein_coding;protein_coding	2;2	15;15	PPP2R1B-206;PPP2R1B-206	1;1
11	111783939	exon;three_prime_UTR	111782195;111782195	111786520;111786396	-;-	ALG9;ALG9	ENSG00000086848.15;ENSG00000086848.15	protein_coding;protein_coding	2;2	15;15	ALG9-215;ALG9-215	1;1
11	112036748	exon	112036627	112036863	-	AP000907.3	ENSG00000271025.1	processed_pseudogene	1	1	AP000907.3-201	NA
11	112084386	three_prime_UTR;three_prime_UTR;three_prime_UTR;exon;exon;exon	112082973;112082973;112082973;112082465;112082468;112082465	112085150;112085150;112085150;112085150;112085150;112085150	+;+;+;+;+;+	NKAPD1;NKAPD1;NKAPD1;NKAPD1;NKAPD1;NKAPD1	ENSG00000150776.18;ENSG00000150776.18;ENSG00000150776.18;ENSG00000150776.18;ENSG00000150776.18;ENSG00000150776.18	protein_coding;protein_coding;protein_coding;protein_coding;protein_coding;protein_coding	2;2;2;2;2;2	6;6;6;6;6;6	NKAPD1-209;NKAPD1-201;NKAPD1-202;NKAPD1-209;NKAPD1-201;NKAPD1-202	2;2;1;2;2;1
11	112183026	exon	112182866	112183191	+	KCTD9P4	ENSG00000214264.4	processed_pseudogene	1	3	KCTD9P4-201	NA
11	112183165	exon	112182866	112183191	+	KCTD9P4	ENSG00000214264.4	processed_pseudogene	1	3	KCTD9P4-201	NA
11	112233945	exon;three_prime_UTR	112233432;112233556	112233973;112233973	+;+	PTS;PTS	ENSG00000150787.8;ENSG00000150787.8	protein_coding;protein_coding	2;2	6;6	PTS-201;PTS-201	1;1
11	112750979	exon	112750149	112751131	+	AP003100.2	ENSG00000285769.2	lncRNA	2	5	AP003100.2-201	None
11	113780379	exon;CDS	113779747;113779796	113780500;113780485	+;+	CLDN25;CLDN25	ENSG00000228607.2;ENSG00000228607.2	protein_coding;protein_coding	2;2	1;1	CLDN25-201;CLDN25-201	NA;NA
11	113829368	exon;CDS	113829197;113829197	113829467;113829379	-;-	USP28;USP28	ENSG00000048028.11;ENSG00000048028.11	protein_coding;protein_coding	2;2	1;1	USP28-213;USP28-213	1;1
11	113947583	exon;three_prime_UTR	113945902;113946138	113949078;113949078	+;+	HTR3B;HTR3B	ENSG00000149305.7;ENSG00000149305.7	protein_coding;protein_coding	2;2	9;9	HTR3B-201;HTR3B-201	1;1
11	114399774	exon;three_prime_UTR	114398532;114398532	114400511;114399959	-;-	C11orf71;C11orf71	ENSG00000180425.11;ENSG00000180425.11	protein_coding;protein_coding	2;2	1;1	C11orf71-202;C11orf71-202	NA;NA
11	115175390	exon;three_prime_UTR;exon;three_prime_UTR;exon;three_prime_UTR;exon;three_prime_UTR	115169236;115169236;115173625;115173625;115174307;115174307;115174307;115174307	115176592;115176473;115176592;115176473;115176592;115176473;115176592;115176473	-;-;-;-;-;-;-;-	CADM1;CADM1;CADM1;CADM1;CADM1;CADM1;CADM1;CADM1	ENSG00000182985.17;ENSG00000182985.17;ENSG00000182985.17;ENSG00000182985.17;ENSG00000182985.17;ENSG00000182985.17;ENSG00000182985.17;ENSG00000182985.17	protein_coding;protein_coding;protein_coding;protein_coding;protein_coding;protein_coding;protein_coding;protein_coding	2;2;2;2;2;2;2;2	10;10;9;9;11;11;11;11	CADM1-203;CADM1-203;CADM1-212;CADM1-212;CADM1-206;CADM1-206;CADM1-204;CADM1-204	1;1;1;1;1;1;1;1
11	115175390	exon;three_prime_UTR;exon;three_prime_UTR;exon;three_prime_UTR;exon;three_prime_UTR	115169236;115169236;115173625;115173625;115174307;115174307;115174307;115174307	115176592;115176473;115176592;115176473;115176592;115176473;115176592;115176473	-;-;-;-;-;-;-;-	CADM1;CADM1;CADM1;CADM1;CADM1;CADM1;CADM1;CADM1	ENSG00000182985.17;ENSG00000182985.17;ENSG00000182985.17;ENSG00000182985.17;ENSG00000182985.17;ENSG00000182985.17;ENSG00000182985.17;ENSG00000182985.17	protein_coding;protein_coding;protein_coding;protein_coding;protein_coding;protein_coding;protein_coding;protein_coding	2;2;2;2;2;2;2;2	10;10;9;9;11;11;11;11	CADM1-203;CADM1-203;CADM1-212;CADM1-212;CADM1-206;CADM1-206;CADM1-204;CADM1-204	1;1;1;1;1;1;1;1
11	115176326	exon;three_prime_UTR;exon;three_prime_UTR;exon;three_prime_UTR;exon;three_prime_UTR;exon;three_prime_UTR	115169236;115169236;115173625;115173625;115174307;115174307;115174307;115174307;115176295;115176295	115176592;115176473;115176592;115176473;115176592;115176473;115176592;115176473;115176592;115176473	-;-;-;-;-;-;-;-;-;-	CADM1;CADM1;CADM1;CADM1;CADM1;CADM1;CADM1;CADM1;CADM1;CADM1	ENSG00000182985.17;ENSG00000182985.17;ENSG00000182985.17;ENSG00000182985.17;ENSG00000182985.17;ENSG00000182985.17;ENSG00000182985.17;ENSG00000182985.17;ENSG00000182985.17;ENSG00000182985.17	protein_coding;protein_coding;protein_coding;protein_coding;protein_coding;protein_coding;protein_coding;protein_coding;protein_coding;protein_coding	2;2;2;2;2;2;2;2;2;2	10;10;9;9;11;11;11;11;12;12	CADM1-203;CADM1-203;CADM1-212;CADM1-212;CADM1-206;CADM1-206;CADM1-204;CADM1-204;CADM1-201;CADM1-201	1;1;1;1;1;1;1;1;1;1
11	115209592	exon;CDS;exon;CDS;exon;CDS;exon;CDS	115209574;115209574;115209574;115209574;115209574;115209574;115209574;115209574	115209657;115209657;115209657;115209657;115209657;115209657;115209657;115209657	-;-;-;-;-;-;-;-	CADM1;CADM1;CADM1;CADM1;CADM1;CADM1;CADM1;CADM1	ENSG00000182985.17;ENSG00000182985.17;ENSG00000182985.17;ENSG00000182985.17;ENSG00000182985.17;ENSG00000182985.17;ENSG00000182985.17;ENSG00000182985.17	protein_coding;protein_coding;protein_coding;protein_coding;protein_coding;protein_coding;protein_coding;protein_coding	2;2;2;2;2;2;3;3	8;8;8;8;8;8;7;7	CADM1-203;CADM1-203;CADM1-206;CADM1-206;CADM1-201;CADM1-201;CADM1-222;CADM1-222	1;1;1;1;1;1;5;5
11	115638732	exon	115638563	115646962	+	AP000997.3	ENSG00000260254.1	lncRNA	2	1	AP000997.3-201	NA
11	115640113	exon	115638563	115646962	+	AP000997.3	ENSG00000260254.1	lncRNA	2	1	AP000997.3-201	NA
11	117168471	exon;three_prime_UTR	117167421;117167700	117171045;117171045	+;+	PAFAH1B2;PAFAH1B2	ENSG00000168092.14;ENSG00000168092.14	protein_coding;protein_coding	2;2	6;6	PAFAH1B2-204;PAFAH1B2-204	1;1
11	117168471	exon;three_prime_UTR	117167421;117167700	117171045;117171045	+;+	PAFAH1B2;PAFAH1B2	ENSG00000168092.14;ENSG00000168092.14	protein_coding;protein_coding	2;2	6;6	PAFAH1B2-204;PAFAH1B2-204	1;1
11	117170647	exon;three_prime_UTR	117167421;117167700	117171045;117171045	+;+	PAFAH1B2;PAFAH1B2	ENSG00000168092.14;ENSG00000168092.14	protein_coding;protein_coding	2;2	6;6	PAFAH1B2-204;PAFAH1B2-204	1;1
11	117290877	exon	117290874	117290929	+	BACE1-AS	ENSG00000278768.2	lncRNA	2	1	BACE1-AS-201	4
11	117409808	exon;CDS	117409618;117409618	117409965;117409965	+;+	CEP164;CEP164	ENSG00000110274.16;ENSG00000110274.16	protein_coding;protein_coding	2;2	30;30	CEP164-201;CEP164-201	1;1
11	117411915	exon;CDS	117411795;117411795	117411917;117411917	+;+	CEP164;CEP164	ENSG00000110274.16;ENSG00000110274.16	protein_coding;protein_coding	2;2	32;32	CEP164-201;CEP164-201	1;1
11	11782404	exon	11781971	11783452	-	AC104383.1	ENSG00000286959.1	lncRNA	2	2	AC104383.1-201	None
11	118378798	exon;five_prime_UTR	118378501;118378501	118378952;118378952	+;+	UBE4A;UBE4A	ENSG00000110344.10;ENSG00000110344.10	protein_coding;protein_coding	2;2	1;1	UBE4A-203;UBE4A-203	2;2
11	118396565	exon;three_prime_UTR;exon;three_prime_UTR	118396314;118396441;118396314;118396441	118399211;118399211;118399207;118399207	+;+;+;+	UBE4A;UBE4A;UBE4A;UBE4A	ENSG00000110344.10;ENSG00000110344.10;ENSG00000110344.10;ENSG00000110344.10	protein_coding;protein_coding;protein_coding;protein_coding	2;2;2;2	20;20;20;20	UBE4A-201;UBE4A-201;UBE4A-202;UBE4A-202	1;1;1;1
11	118721872	exon	118721104	118722075	-	AP002954.2	ENSG00000287238.1	lncRNA	2	2	AP002954.2-201	None
11	119300909	exon;three_prime_UTR;exon;three_prime_UTR	119299495;119299782;119299495;119299782	119301887;119301887;119308149;119308149	+;+;+;+	CBL;CBL;CBL;CBL	ENSG00000110395.7;ENSG00000110395.7;ENSG00000110395.7;ENSG00000110395.7	protein_coding;protein_coding;protein_coding;protein_coding	2;2;2;2	15;15;16;16	CBL-204;CBL-204;CBL-201;CBL-201	5;5;1;1
11	120008155	exon	120008048	120008793	-	AP001360.1	ENSG00000255216.2	lncRNA	2	5	AP001360.1-203	None
11	120010435	exon	120008975	120012001	-	AP001360.1	ENSG00000255216.2	lncRNA	2	3	AP001360.1-204	None
11	120333061	exon;three_prime_UTR;exon;three_prime_UTR	120329977;120330516;120330407;120330516	120333686;120333686;120333682;120333682	+;+;+;+	TLCD5;TLCD5;TLCD5;TLCD5	ENSG00000181264.9;ENSG00000181264.9;ENSG00000181264.9;ENSG00000181264.9	protein_coding;protein_coding;protein_coding;protein_coding	2;2;2;2	3;3;4;4	TLCD5-202;TLCD5-202;TLCD5-204;TLCD5-204	2;2;1;1
11	121870449	exon	121870367	121870526	+	AP001977.1	ENSG00000286044.1	lncRNA	2	4	AP001977.1-202	None
11	122115503	exon;three_prime_UTR	122115340;122115340	122116215;122115595	-;-	BLID;BLID	ENSG00000259571.2;ENSG00000259571.2	protein_coding;protein_coding	2;2	1;1	BLID-201;BLID-201	NA;NA
11	123597968	exon	123597946	123599452	-	SF3A3P2	ENSG00000254449.1	processed_pseudogene	1	1	SF3A3P2-201	NA
11	123625024	exon;three_prime_UTR;exon;three_prime_UTR;exon;three_prime_UTR	123622506;123622596;123622506;123622596;123622506;123622596	123627774;123627774;123626401;123626401;123627774;123627774	+;+;+;+;+;+	GRAMD1B;GRAMD1B;GRAMD1B;GRAMD1B;GRAMD1B;GRAMD1B	ENSG00000023171.18;ENSG00000023171.18;ENSG00000023171.18;ENSG00000023171.18;ENSG00000023171.18;ENSG00000023171.18	protein_coding;protein_coding;protein_coding;protein_coding;protein_coding;protein_coding	2;2;2;2;2;2	20;20;20;20;18;18	GRAMD1B-207;GRAMD1B-207;GRAMD1B-206;GRAMD1B-206;GRAMD1B-218;GRAMD1B-218	1;1;2;2;None;None
11	124013045	exon;five_prime_UTR;exon;five_prime_UTR	124012997;124012997;124012997;124012997	124013112;124013112;124013112;124013112	+;+;+;+	OR10G4;OR10G4;OR10G4;OR10G4	ENSG00000254737.2;ENSG00000254737.2;ENSG00000254737.2;ENSG00000254737.2	protein_coding;protein_coding;protein_coding;protein_coding	2;2;2;2	1;1;1;1	OR10G4-203;OR10G4-203;OR10G4-202;OR10G4-202	None;None;None;None
11	124146643	exon;three_prime_UTR;exon;three_prime_UTR	124145866;124145946;124145866;124145946	124146909;124146909;124147721;124147721	+;+;+;+	VWA5A;VWA5A;VWA5A;VWA5A	ENSG00000110002.16;ENSG00000110002.16;ENSG00000110002.16;ENSG00000110002.16	protein_coding;protein_coding;protein_coding;protein_coding	3;3;2;2	18;18;19;19	VWA5A-203;VWA5A-203;VWA5A-205;VWA5A-205	1;1;1;1
11	124274261	exon	124273970	124274581	+	SLC5A4P1	ENSG00000255116.2	processed_pseudogene	1	1	SLC5A4P1-201	NA
11	124440837	exon;CDS;exon;CDS	124437445;124440150;124440126;124440150	124441101;124441085;124441158;124441085	-;-;-;-	OR8B8;OR8B8;OR8B8;OR8B8	ENSG00000197125.3;ENSG00000197125.3;ENSG00000197125.3;ENSG00000197125.3	protein_coding;protein_coding;protein_coding;protein_coding	2;2;2;2	3;3;1;1	OR8B8-202;OR8B8-202;OR8B8-201;OR8B8-201	None;None;NA;NA
11	124920709	exon;three_prime_UTR	124919205;124919205	124921440;124921137	-;-	HEPACAM;HEPACAM	ENSG00000165478.7;ENSG00000165478.7	protein_coding;protein_coding	2;2	7;7	HEPACAM-201;HEPACAM-201	1;1
11	12538150	exon	12538083	12538544	-	AC009806.1	ENSG00000254847.1	lncRNA	2	2	AC009806.1-201	3
11	125488988	exon;three_prime_UTR	125488927;125488927	125489822;125489462	-;-	FEZ1;FEZ1	ENSG00000149557.14;ENSG00000149557.14	protein_coding;protein_coding	2;2	2;2	FEZ1-202;FEZ1-202	2;2
11	125489061	exon;three_prime_UTR	125488927;125488927	125489822;125489462	-;-	FEZ1;FEZ1	ENSG00000149557.14;ENSG00000149557.14	protein_coding;protein_coding	2;2	2;2	FEZ1-202;FEZ1-202	2;2
11	125620891	exon;three_prime_UTR;exon;three_prime_UTR	125620772;125620811;125620772;125620811	125623091;125623091;125622721;125622721	+;+;+;+	STT3A;STT3A;STT3A;STT3A	ENSG00000134910.14;ENSG00000134910.14;ENSG00000134910.14;ENSG00000134910.14	protein_coding;protein_coding;protein_coding;protein_coding	2;2;2;2	18;18;19;19	STT3A-201;STT3A-201;STT3A-217;STT3A-217	1;1;None;None
11	125906083	exon;five_prime_UTR;exon;CDS	125906074;125906074;125906074;125906074	125906209;125906209;125906209;125906209	+;+;+;+	DDX25;DDX25;DDX25;DDX25	ENSG00000109832.14;ENSG00000109832.14;ENSG00000109832.14;ENSG00000109832.14	protein_coding;protein_coding;protein_coding;protein_coding	2;2;2;2	4;4;4;4	DDX25-202;DDX25-202;DDX25-201;DDX25-201	5;5;1;1
11	125958006	exon;three_prime_UTR;exon;three_prime_UTR;exon;three_prime_UTR	125955817;125955915;125955796;125955796;125957452;125957452	125958647;125958647;125961105;125960941;125961105;125960941	+;+;-;-;-;-	VSIG10L2;VSIG10L2;CDON;CDON;CDON;CDON	ENSG00000283703.2;ENSG00000283703.2;ENSG00000064309.14;ENSG00000064309.14;ENSG00000064309.14;ENSG00000064309.14	protein_coding;protein_coding;protein_coding;protein_coding;protein_coding;protein_coding	2;2;2;2;2;2	10;10;20;20;11;11	VSIG10L2-202;VSIG10L2-202;CDON-202;CDON-202;CDON-206;CDON-206	5;5;1;1;1;1
11	127071238	exon	127070406	127073296	+	AP001993.1	ENSG00000255087.4	lncRNA	2	1	AP001993.1-230	None
11	1275063	exon;three_prime_UTR;exon;three_prime_UTR;exon;three_prime_UTR	1274371;1274371;1274372;1274372;1274373;1274373	1277253;1277038;1277253;1277038;1277253;1277038	-;-;-;-;-;-	TOLLIP;TOLLIP;TOLLIP;TOLLIP;TOLLIP;TOLLIP	ENSG00000078902.16;ENSG00000078902.16;ENSG00000078902.16;ENSG00000078902.16;ENSG00000078902.16;ENSG00000078902.16	protein_coding;protein_coding;protein_coding;protein_coding;protein_coding;protein_coding	1;1;1;1;2;2	6;6;6;6;5;5	TOLLIP-202;TOLLIP-202;TOLLIP-207;TOLLIP-207;TOLLIP-203;TOLLIP-203	1;1;2;2;2;2
11	128936499	exon;three_prime_UTR	128935377;128935377	128937894;128937491	-;-	TP53AIP1;TP53AIP1	ENSG00000120471.15;ENSG00000120471.15	protein_coding;protein_coding	3;3	2;2	TP53AIP1-206;TP53AIP1-206	1;1
11	12939310	exon;three_prime_UTR;exon;three_prime_UTR	12937109;12937223;12937109;12937223	12944737;12944737;12944483;12944483	+;+;+;+	TEAD1;TEAD1;TEAD1;TEAD1	ENSG00000187079.19;ENSG00000187079.19;ENSG00000187079.19;ENSG00000187079.19	protein_coding;protein_coding;protein_coding;protein_coding	2;2;2;2	13;13;8;8	TEAD1-206;TEAD1-206;TEAD1-203;TEAD1-203	1;1;1;1
11	12982927	exon	12981979	12983586	-	LINC00958	ENSG00000251381.8	lncRNA	2	5	LINC00958-210	None
11	129859103	exon;three_prime_UTR;exon;three_prime_UTR	129858574;129858686;129858574;129858686	129859215;129859215;129860003;129860003	+;+;+;+	TMEM45B;TMEM45B;TMEM45B;TMEM45B	ENSG00000151715.8;ENSG00000151715.8;ENSG00000151715.8;ENSG00000151715.8	protein_coding;protein_coding;protein_coding;protein_coding	1;1;2;2	6;6;6;6	TMEM45B-202;TMEM45B-202;TMEM45B-201;TMEM45B-201	1;1;2;2
11	130227404	exon;three_prime_UTR;exon;three_prime_UTR;exon;three_prime_UTR;exon;three_prime_UTR	130226677;130226677;130226677;130226677;130226678;130226678;130226684;130226684	130234273;130233990;130231715;130231715;130234273;130234262;130228356;130228356	-;-;-;-;-;-;-;-	ZBTB44;ZBTB44;ZBTB44;ZBTB44;ZBTB44;ZBTB44;ZBTB44;ZBTB44	ENSG00000196323.14;ENSG00000196323.14;ENSG00000196323.14;ENSG00000196323.14;ENSG00000196323.14;ENSG00000196323.14;ENSG00000196323.14;ENSG00000196323.14	protein_coding;protein_coding;protein_coding;protein_coding;protein_coding;protein_coding;protein_coding;protein_coding	1;1;2;2;2;2;3;3	6;6;8;8;6;6;10;10	ZBTB44-206;ZBTB44-206;ZBTB44-201;ZBTB44-201;ZBTB44-205;ZBTB44-205;ZBTB44-202;ZBTB44-202	5;5;1;1;1;1;5;5
11	130790990	exon	130789231	130791025	-	PPP1R10P1	ENSG00000255352.1	processed_pseudogene	2	1	PPP1R10P1-201	NA
11	130866973	exon	130866254	130870247	-	AP003486.1	ENSG00000255455.2	lncRNA	2	1	AP003486.1-201	NA
11	132314923	exon;three_prime_UTR	132314552;132314721	132315070;132315070	+;+	NTM;NTM	ENSG00000182667.14;ENSG00000182667.14	protein_coding;protein_coding	2;2	6;6	NTM-201;NTM-201	1;1
11	132418408	exon;three_prime_UTR;exon;three_prime_UTR;exon;three_prime_UTR;exon;three_prime_UTR	132414977;132414977;132414981;132414981;132414981;132414981;132414981;132414981	132420293;132420192;132420293;132420192;132420293;132420192;132420293;132420192	-;-;-;-;-;-;-;-	OPCML;OPCML;OPCML;OPCML;OPCML;OPCML;OPCML;OPCML	ENSG00000183715.13;ENSG00000183715.13;ENSG00000183715.13;ENSG00000183715.13;ENSG00000183715.13;ENSG00000183715.13;ENSG00000183715.13;ENSG00000183715.13	protein_coding;protein_coding;protein_coding;protein_coding;protein_coding;protein_coding;protein_coding;protein_coding	2;2;3;3;3;3;2;2	7;7;8;8;9;9;8;8	OPCML-201;OPCML-201;OPCML-208;OPCML-208;OPCML-207;OPCML-207;OPCML-203;OPCML-203	1;1;5;5;5;5;1;1
11	134318972	exon;three_prime_UTR	134318877;134318943	134319564;134319564	+;+	GLB1L3;GLB1L3	ENSG00000166105.16;ENSG00000166105.16	protein_coding;protein_coding	2;2	20;20	GLB1L3-203;GLB1L3-203	5;5
11	13464617	exon	13463377	13464717	+	AC021269.3	ENSG00000287548.1	lncRNA	2	1	AC021269.3-201	None
11	14483065	exon;CDS;exon;CDS	14483032;14483032;14483032;14483032	14483151;14483151;14483151;14483151	-;-;-;-	COPB1;COPB1;COPB1;COPB1	ENSG00000129083.13;ENSG00000129083.13;ENSG00000129083.13;ENSG00000129083.13	protein_coding;protein_coding;protein_coding;protein_coding	2;2;2;2	8;8;8;8	COPB1-201;COPB1-201;COPB1-202;COPB1-202	1;1;1;1
11	1599080	exon	1597248	1599184	+	KRTAP5-AS1	ENSG00000233930.4	lncRNA	2	2	KRTAP5-AS1-201	2
11	18144109	exon	18143759	18145142	+	AC090099.2	ENSG00000285562.1	lncRNA	2	2	AC090099.2-201	None
11	18366241	exon;three_prime_UTR;exon;three_prime_UTR;exon;three_prime_UTR;exon;three_prime_UTR	18365783;18365870;18365783;18365870;18365783;18365870;18365783;18365870	18366261;18366261;18366275;18366275;18366813;18366813;18367045;18367045	+;+;+;+;+;+;+;+	GTF2H1;GTF2H1;GTF2H1;GTF2H1;GTF2H1;GTF2H1;GTF2H1;GTF2H1	ENSG00000110768.12;ENSG00000110768.12;ENSG00000110768.12;ENSG00000110768.12;ENSG00000110768.12;ENSG00000110768.12;ENSG00000110768.12;ENSG00000110768.12	protein_coding;protein_coding;protein_coding;protein_coding;protein_coding;protein_coding;protein_coding;protein_coding	2;2;2;2;2;2;2;2	16;16;8;8;14;14;15;15	GTF2H1-203;GTF2H1-203;GTF2H1-210;GTF2H1-210;GTF2H1-214;GTF2H1-214;GTF2H1-201;GTF2H1-201	2;2;2;2;2;2;1;1
11	18366706	exon;three_prime_UTR;exon;three_prime_UTR	18365783;18365870;18365783;18365870	18366813;18366813;18367045;18367045	+;+;+;+	GTF2H1;GTF2H1;GTF2H1;GTF2H1	ENSG00000110768.12;ENSG00000110768.12;ENSG00000110768.12;ENSG00000110768.12	protein_coding;protein_coding;protein_coding;protein_coding	2;2;2;2	14;14;15;15	GTF2H1-214;GTF2H1-214;GTF2H1-201;GTF2H1-201	2;2;1;1
11	18402900	exon;CDS;exon;CDS;exon;CDS;exon;CDS;exon;CDS;exon;CDS;exon;CDS	18402840;18402840;18402840;18402840;18402840;18402840;18402840;18402840;18402840;18402840;18402840;18402840;18402840;18402840	18403013;18403013;18403013;18403013;18403013;18403013;18403013;18403013;18403013;18403013;18403013;18403013;18403013;18403013	+;+;+;+;+;+;+;+;+;+;+;+;+;+	LDHA;LDHA;LDHA;LDHA;LDHA;LDHA;LDHA;LDHA;LDHA;LDHA;LDHA;LDHA;LDHA;LDHA	ENSG00000134333.14;ENSG00000134333.14;ENSG00000134333.14;ENSG00000134333.14;ENSG00000134333.14;ENSG00000134333.14;ENSG00000134333.14;ENSG00000134333.14;ENSG00000134333.14;ENSG00000134333.14;ENSG00000134333.14;ENSG00000134333.14;ENSG00000134333.14;ENSG00000134333.14	protein_coding;protein_coding;protein_coding;protein_coding;protein_coding;protein_coding;protein_coding;protein_coding;protein_coding;protein_coding;protein_coding;protein_coding;protein_coding;protein_coding	2;2;1;1;2;2;2;2;3;3;2;2;2;2	4;4;5;5;5;5;5;5;5;5;5;5;4;4	LDHA-206;LDHA-206;LDHA-204;LDHA-204;LDHA-205;LDHA-205;LDHA-201;LDHA-201;LDHA-218;LDHA-218;LDHA-203;LDHA-203;LDHA-220;LDHA-220	2;2;2;2;1;1;3;3;2;2;2;2;1;1
11	18451453	exon;three_prime_UTR	18450963;18451128	18452063;18452063	+;+	LDHC;LDHC	ENSG00000166796.12;ENSG00000166796.12	protein_coding;protein_coding	2;2	8;8	LDHC-207;LDHC-207	1;1
11	1908331	exon	1907832	1908656	+	LINC01150	ENSG00000229671.3	lncRNA	2	5	LINC01150-201	1
11	19711916	exon	19710934	19712619	-	AC009549.1	ENSG00000270607.1	lncRNA	2	1	AC009549.1-201	NA
11	2138711	exon;five_prime_UTR;exon;five_prime_UTR	2138229;2138229;2138229;2138229	2138974;2138974;2139389;2139389	-;-;-;-	IGF2;IGF2;IGF2;IGF2	ENSG00000167244.21;ENSG00000167244.21;ENSG00000167244.21;ENSG00000167244.21	protein_coding;protein_coding;protein_coding;protein_coding	2;2;2;2	1;1;1;1	IGF2-204;IGF2-204;IGF2-205;IGF2-205	2;2;1;1
11	214486	exon;three_prime_UTR;exon;three_prime_UTR;exon;three_prime_UTR	214230;214351;214230;214351;214230;214351	215113;215113;215113;215113;215113;215113	+;+;+;+;+;+	RIC8A;RIC8A;RIC8A;RIC8A;RIC8A;RIC8A	ENSG00000177963.14;ENSG00000177963.14;ENSG00000177963.14;ENSG00000177963.14;ENSG00000177963.14;ENSG00000177963.14	protein_coding;protein_coding;protein_coding;protein_coding;protein_coding;protein_coding	2;2;2;2;2;2	10;10;10;10;8;8	RIC8A-203;RIC8A-203;RIC8A-201;RIC8A-201;RIC8A-208;RIC8A-208	1;1;1;1;1;1
11	22379481	exon;three_prime_UTR	22377405;22377741	22379503;22379503	+;+	SLC17A6;SLC17A6	ENSG00000091664.9;ENSG00000091664.9	protein_coding;protein_coding	2;2	12;12	SLC17A6-201;SLC17A6-201	1;1
11	22921263	exon	22920518	22922823	+	AC006299.1	ENSG00000246225.7	lncRNA	2	4	AC006299.1-202	4
11	22922305	exon	22920518	22922823	+	AC006299.1	ENSG00000246225.7	lncRNA	2	4	AC006299.1-202	4
11	247363	exon;CDS;exon;CDS;exon;CDS;exon;CDS	247277;247277;247277;247277;247277;247277;247277;247277	247448;247448;247448;247448;247448;247448;247448;247448	+;+;+;+;+;+;+;+	PSMD13;PSMD13;PSMD13;PSMD13;PSMD13;PSMD13;PSMD13;PSMD13	ENSG00000185627.18;ENSG00000185627.18;ENSG00000185627.18;ENSG00000185627.18;ENSG00000185627.18;ENSG00000185627.18;ENSG00000185627.18;ENSG00000185627.18	protein_coding;protein_coding;protein_coding;protein_coding;protein_coding;protein_coding;protein_coding;protein_coding	2;2;2;2;3;3;2;2	7;7;5;5;7;7;7;7	PSMD13-212;PSMD13-212;PSMD13-203;PSMD13-203;PSMD13-215;PSMD13-215;PSMD13-201;PSMD13-201	1;1;2;2;5;5;5;5
11	25140856	exon	25140533	25141023	-	AC087373.1	ENSG00000255368.1	processed_pseudogene	1	1	AC087373.1-201	NA
11	2610745	exon	2608328	2699994	-	KCNQ1OT1	ENSG00000269821.1	lncRNA	2	1	KCNQ1OT1-201	NA
11	2612039	exon	2608328	2699994	-	KCNQ1OT1	ENSG00000269821.1	lncRNA	2	1	KCNQ1OT1-201	NA
11	2620957	exon	2608328	2699994	-	KCNQ1OT1	ENSG00000269821.1	lncRNA	2	1	KCNQ1OT1-201	NA
11	2623845	exon	2608328	2699994	-	KCNQ1OT1	ENSG00000269821.1	lncRNA	2	1	KCNQ1OT1-201	NA
11	2624589	exon	2608328	2699994	-	KCNQ1OT1	ENSG00000269821.1	lncRNA	2	1	KCNQ1OT1-201	NA
11	2630365	exon	2608328	2699994	-	KCNQ1OT1	ENSG00000269821.1	lncRNA	2	1	KCNQ1OT1-201	NA
11	26560153	exon;three_prime_UTR;exon;three_prime_UTR;exon;three_prime_UTR;exon;three_prime_UTR	26559032;26559032;26559033;26559033;26559033;26559033;26559033;26559033	26561225;26561064;26561225;26561064;26561225;26561064;26561225;26561064	-;-;-;-;-;-;-;-	MUC15;MUC15;MUC15;MUC15;MUC15;MUC15;MUC15;MUC15	ENSG00000169550.14;ENSG00000169550.14;ENSG00000169550.14;ENSG00000169550.14;ENSG00000169550.14;ENSG00000169550.14;ENSG00000169550.14;ENSG00000169550.14	protein_coding;protein_coding;protein_coding;protein_coding;protein_coding;protein_coding;protein_coding;protein_coding	2;2;3;3;3;3;2;2	5;5;4;4;3;3;4;4	MUC15-205;MUC15-205;MUC15-202;MUC15-202;MUC15-201;MUC15-201;MUC15-203;MUC15-203	1;1;5;5;5;5;2;2
11	26670894	exon;three_prime_UTR	26667020;26667020	26671251;26671101	-;-	SLC5A12;SLC5A12	ENSG00000148942.15;ENSG00000148942.15	protein_coding;protein_coding	2;2	15;15	SLC5A12-202;SLC5A12-202	1;1
11	2699061	exon	2608328	2699994	-	KCNQ1OT1	ENSG00000269821.1	lncRNA	2	1	KCNQ1OT1-201	NA
11	27055477	exon;CDS;exon;CDS;exon;CDS;exon;CDS	27055396;27055431;27055393;27055431;27055393;27055431;27055217;27055431	27055649;27055649;27055649;27055649;27055649;27055649;27055649;27055649	+;+;+;+;+;+;+;+	BBOX1;BBOX1;BBOX1;BBOX1;BBOX1;BBOX1;BBOX1;BBOX1	ENSG00000129151.9;ENSG00000129151.9;ENSG00000129151.9;ENSG00000129151.9;ENSG00000129151.9;ENSG00000129151.9;ENSG00000129151.9;ENSG00000129151.9	protein_coding;protein_coding;protein_coding;protein_coding;protein_coding;protein_coding;protein_coding;protein_coding	2;2;2;2;2;2;2;2	2;2;3;3;2;2;1;1	BBOX1-205;BBOX1-205;BBOX1-201;BBOX1-201;BBOX1-204;BBOX1-204;BBOX1-202;BBOX1-202	5;5;5;5;1;1;1;1
11	27496012	exon;three_prime_UTR;exon;three_prime_UTR	27494418;27494418;27494898;27494898	27498804;27498648;27498804;27498648	-;-;-;-	LIN7C;LIN7C;LIN7C;LIN7C	ENSG00000148943.12;ENSG00000148943.12;ENSG00000148943.12;ENSG00000148943.12	protein_coding;protein_coding;protein_coding;protein_coding	2;2;2;2	5;5;4;4	LIN7C-201;LIN7C-201;LIN7C-202;LIN7C-202	1;1;1;1
11	2990284	exon	2989863	2991344	+	AC131971.1	ENSG00000183562.3	lncRNA	2	1	AC131971.1-201	NA
11	31663232	exon;three_prime_UTR	31662526;31662658	31664448;31664448	+;+	ELP4;ELP4	ENSG00000109911.19;ENSG00000109911.19	protein_coding;protein_coding	2;2	10;10	ELP4-210;ELP4-210	5;5
11	31788862	exon;three_prime_UTR;exon;three_prime_UTR;exon;three_prime_UTR;exon;three_prime_UTR;exon;three_prime_UTR;exon;three_prime_UTR;exon;three_prime_UTR	31783393;31783525;31784779;31784779;31784782;31784782;31784792;31784792;31784792;31784792;31784792;31784792;31784792;31784792	31790324;31790324;31790019;31789933;31790019;31789933;31790019;31789933;31790019;31789933;31790019;31789933;31790019;31789933	+;+;-;-;-;-;-;-;-;-;-;-;-;-	ELP4;ELP4;PAX6;PAX6;PAX6;PAX6;PAX6;PAX6;PAX6;PAX6;PAX6;PAX6;PAX6;PAX6	ENSG00000109911.19;ENSG00000109911.19;ENSG00000007372.23;ENSG00000007372.23;ENSG00000007372.23;ENSG00000007372.23;ENSG00000007372.23;ENSG00000007372.23;ENSG00000007372.23;ENSG00000007372.23;ENSG00000007372.23;ENSG00000007372.23;ENSG00000007372.23;ENSG00000007372.23	protein_coding;protein_coding;protein_coding;protein_coding;protein_coding;protein_coding;protein_coding;protein_coding;protein_coding;protein_coding;protein_coding;protein_coding;protein_coding;protein_coding	2;2;2;2;2;2;2;2;2;2;2;2;2;2	10;10;13;13;14;14;10;10;14;14;13;13;14;14	ELP4-229;ELP4-229;PAX6-231;PAX6-231;PAX6-269;PAX6-269;PAX6-254;PAX6-254;PAX6-209;PAX6-209;PAX6-282;PAX6-282;PAX6-244;PAX6-244	1;1;5;5;5;5;5;5;1;1;None;None;1;1
11	31790097	exon;three_prime_UTR	31783393;31783525	31790324;31790324	+;+	ELP4;ELP4	ENSG00000109911.19;ENSG00000109911.19	protein_coding;protein_coding	2;2	10;10	ELP4-229;ELP4-229	1;1
11	32001506	exon;exon;exon	32001206;32001206;32001206	32002405;32002120;32002359	+;+;+	PAUPAR;PAUPAR;PAUPAR	ENSG00000281880.2;ENSG00000281880.2;ENSG00000281880.2	lncRNA;lncRNA;lncRNA	2;2;2	4;6;4	PAUPAR-212;PAUPAR-216;PAUPAR-211	None;None;None
11	322157	exon	321991	322223	+	AC136475.4	ENSG00000255089.1	lncRNA	2	1	AC136475.4-201	5
11	322352	exon	322186	322400	-	AC136475.8	ENSG00000270105.1	lncRNA	2	2	AC136475.8-201	5
11	324885	exon;exon	324575;324111	325631;325069	+;+	AC136475.1;AC136475.1	ENSG00000251661.3;ENSG00000251661.3	lncRNA;lncRNA	2;2	2;2	AC136475.1-202;AC136475.1-203	1;3
11	32857977	exon;three_prime_UTR	32853296;32853528	32858120;32858120	+;+	PRRG4;PRRG4	ENSG00000135378.4;ENSG00000135378.4	protein_coding;protein_coding	2;2	6;6	PRRG4-201;PRRG4-201	1;1
11	33671910	exon;three_prime_UTR;exon;three_prime_UTR	33667873;33668155;33667873;33668155	33674102;33674102;33674098;33674098	+;+;+;+	KIAA1549L;KIAA1549L;KIAA1549L;KIAA1549L	ENSG00000110427.16;ENSG00000110427.16;ENSG00000110427.16;ENSG00000110427.16	protein_coding;protein_coding;protein_coding;protein_coding	2;2;3;3	21;21;20;20	KIAA1549L-204;KIAA1549L-204;KIAA1549L-202;KIAA1549L-202	None;None;1;1
11	33744991	exon;three_prime_UTR;exon;three_prime_UTR	33740965;33740965;33744685;33744685	33747320;33747120;33746655;33746601	-;-;-;-	FBXO3;FBXO3;FBXO3;FBXO3	ENSG00000110429.14;ENSG00000110429.14;ENSG00000110429.14;ENSG00000110429.14	protein_coding;protein_coding;protein_coding;protein_coding	2;2;1;1	10;10;11;11	FBXO3-208;FBXO3-208;FBXO3-213;FBXO3-213	2;2;5;5
11	34493084	exon;three_prime_UTR	34491597;34491597	34493712;34493416	-;-	ELF5;ELF5	ENSG00000135374.11;ENSG00000135374.11	protein_coding;protein_coding	2;2	3;3	ELF5-205;ELF5-205	2;2
11	35808591	exon;three_prime_UTR	35806358;35806386	35818007;35818007	+;+	TRIM44;TRIM44	ENSG00000166326.7;ENSG00000166326.7	protein_coding;protein_coding	2;2	5;5	TRIM44-201;TRIM44-201	1;1
11	35814850	exon;three_prime_UTR	35806358;35806386	35818007;35818007	+;+	TRIM44;TRIM44	ENSG00000166326.7;ENSG00000166326.7	protein_coding;protein_coding	2;2	5;5	TRIM44-201;TRIM44-201	1;1
11	36487662	exon;three_prime_UTR	36483769;36483769	36490650;36489837	-;-	TRAF6;TRAF6	ENSG00000175104.15;ENSG00000175104.15	protein_coding;protein_coding	2;2	7;7	TRAF6-202;TRAF6-202	1;1
11	36579665	exon;three_prime_UTR	36573291;36576437	36579762;36579762	+;+	RAG1;RAG1	ENSG00000166349.10;ENSG00000166349.10	protein_coding;protein_coding	2;2	2;2	RAG1-201;RAG1-201	1;1
11	3973970	exon	3973913	3974237	-	HNRNPA1P76	ENSG00000255141.1	processed_pseudogene	1	1	HNRNPA1P76-201	NA
11	41459654	exon;five_prime_UTR	41459431;41459431	41459773;41459773	-;-	LRRC4C;LRRC4C	ENSG00000148948.8;ENSG00000148948.8	protein_coding;protein_coding	2;2	1;1	LRRC4C-204;LRRC4C-204	1;1
11	418929	exon;CDS	418888;418888	418989;418989	-;-	ANO9;ANO9	ENSG00000185101.13;ENSG00000185101.13	protein_coding;protein_coding	2;2	21;21	ANO9-201;ANO9-201	1;1
11	43063971	exon	43063637	43064855	-	AC009643.2	ENSG00000271028.1	processed_pseudogene	1	2	AC009643.2-201	NA
11	43523013	exon	43522036	43523264	+	CTBP2P6	ENSG00000213697.3	processed_pseudogene	1	1	CTBP2P6-201	NA
11	43649728	exon	43649688	43650096	+	AC068205.2	ENSG00000283341.2	lncRNA	2	2	AC068205.2-204	None
11	43828544	exon	43827517	43831590	-	AC087521.2	ENSG00000246250.3	lncRNA	2	2	AC087521.2-205	None
11	43855898	exon;three_prime_UTR	43855144;43855249	43856615;43856615	+;+	HSD17B12;HSD17B12	ENSG00000149084.13;ENSG00000149084.13	protein_coding;protein_coding	2;2	11;11	HSD17B12-201;HSD17B12-201	1;1
11	44310037	exon;CDS	44309597;44309597	44310139;44310062	-;-	ALX4;ALX4	ENSG00000052850.8;ENSG00000052850.8	protein_coding;protein_coding	2;2	1;1	ALX4-201;ALX4-201	None;None
11	4489521	exon;CDS;exon;CDS;exon;CDS	4488573;4488901;4488953;4488953;4488879;4488901	4493497;4489845;4493497;4489845;4489908;4489845	+;+;+;+;+;+	OR52K1;OR52K1;OR52K1;OR52K1;OR52K1;OR52K1	ENSG00000196778.3;ENSG00000196778.3;ENSG00000196778.3;ENSG00000196778.3;ENSG00000196778.3;ENSG00000196778.3	protein_coding;protein_coding;protein_coding;protein_coding;protein_coding;protein_coding	2;2;2;2;3;3	2;2;2;2;1;1	OR52K1-202;OR52K1-202;OR52K1-203;OR52K1-203;OR52K1-201;OR52K1-201	None;None;None;None;NA;NA
11	4492084	three_prime_UTR;three_prime_UTR;exon;exon	4489846;4489846;4488573;4488953	4493497;4493497;4493497;4493497	+;+;+;+	OR52K1;OR52K1;OR52K1;OR52K1	ENSG00000196778.3;ENSG00000196778.3;ENSG00000196778.3;ENSG00000196778.3	protein_coding;protein_coding;protein_coding;protein_coding	2;2;2;2	2;2;2;2	OR52K1-202;OR52K1-203;OR52K1-202;OR52K1-203	None;None;None;None
11	45745013	exon	45744029	45745013	+	AC044839.1	ENSG00000254519.5	lncRNA	2	6	AC044839.1-216	None
11	45752044	exon	45751724	45752279	-	LINC02690	ENSG00000255226.2	lncRNA	2	1	LINC02690-205	None
11	45882619	exon;three_prime_UTR;exon;three_prime_UTR;exon;three_prime_UTR	45880914;45880914;45880914;45880914;45880914;45880914	45883247;45883247;45883248;45883248;45883244;45883244	+;+;+;+;+;+	CRY2;CRY2;CRY2;CRY2;CRY2;CRY2	ENSG00000121671.12;ENSG00000121671.12;ENSG00000121671.12;ENSG00000121671.12;ENSG00000121671.12;ENSG00000121671.12	protein_coding;protein_coding;protein_coding;protein_coding;protein_coding;protein_coding	2;2;3;3;2;2	12;12;12;12;12;12	CRY2-202;CRY2-202;CRY2-212;CRY2-212;CRY2-211;CRY2-211	1;1;1;1;1;1
11	45896700	exon;five_prime_UTR	45896550;45896550	45896950;45896879	+;+	MAPK8IP1;MAPK8IP1	ENSG00000121653.11;ENSG00000121653.11	protein_coding;protein_coding	1;1	1;1	MAPK8IP1-202;MAPK8IP1-202	5;5
11	46321392	exon;three_prime_UTR	46320710;46320747	46321409;46321409	+;+	CREB3L1;CREB3L1	ENSG00000157613.11;ENSG00000157613.11	protein_coding;protein_coding	2;2	12;12	CREB3L1-206;CREB3L1-206	1;1
11	46587502	exon	46587278	46587808	+	AC127035.1	ENSG00000285658.1	lncRNA	2	3	AC127035.1-201	None
11	47557534	exon	47557534	47557833	-	RN7SL652P	ENSG00000265559.2	misc_RNA	3	1	RN7SL652P-201	NA
11	48123841	exon;CDS;exon;CDS;exon;CDS;exon;CDS	48123613;48123613;48123613;48123613;48123613;48123613;48123613;48123613	48123870;48123870;48123870;48123870;48123870;48123870;48123870;48123870	+;+;+;+;+;+;+;+	PTPRJ;PTPRJ;PTPRJ;PTPRJ;PTPRJ;PTPRJ;PTPRJ;PTPRJ	ENSG00000149177.13;ENSG00000149177.13;ENSG00000149177.13;ENSG00000149177.13;ENSG00000149177.13;ENSG00000149177.13;ENSG00000149177.13;ENSG00000149177.13	protein_coding;protein_coding;protein_coding;protein_coding;protein_coding;protein_coding;protein_coding;protein_coding	3;3;2;2;3;3;2;2	5;5;5;5;5;5;5;5	PTPRJ-207;PTPRJ-207;PTPRJ-201;PTPRJ-201;PTPRJ-208;PTPRJ-208;PTPRJ-202;PTPRJ-202	5;5;1;1;5;5;1;1
11	48580236	exon	48579436	48580336	+	OR4A45P	ENSG00000213607.4	unprocessed_pseudogene	2	1	OR4A45P-201	NA
11	4909095	exon;three_prime_UTR	4907339;4908309	4909462;4909462	+;+	OR51A7;OR51A7	ENSG00000176895.9;ENSG00000176895.9	protein_coding;protein_coding	2;2	2;2	OR51A7-202;OR51A7-202	None;None
11	4909187	exon;three_prime_UTR	4907339;4908309	4909462;4909462	+;+	OR51A7;OR51A7	ENSG00000176895.9;ENSG00000176895.9	protein_coding;protein_coding	2;2	2;2	OR51A7-202;OR51A7-202	None;None
11	49099524	exon	49098163	49101168	-	AC118273.1	ENSG00000254412.1	processed_pseudogene	2	1	AC118273.1-201	NA
11	4913372	three_prime_UTR;exon	4912588;4912588	4914718;4915739	-;-	OR51G2;OR51G2	ENSG00000176893.5;ENSG00000176893.5	protein_coding;protein_coding	2;2	2;2	OR51G2-202;OR51G2-202	None;None
11	49434320	exon	49433480	49434438	-	AC135977.1	ENSG00000226268.3	processed_pseudogene	2	1	AC135977.1-201	NA
11	49918249	exon	49917391	49918478	-	OR4A18P	ENSG00000254637.1	unprocessed_pseudogene	2	1	OR4A18P-201	NA
11	49920962	exon	49920312	49921414	-	OR4A19P	ENSG00000254940.1	unprocessed_pseudogene	2	1	OR4A19P-201	NA
11	5130521	exon;three_prime_UTR;exon;three_prime_UTR	5128776;5128776;5128776;5128776	5132702;5131691;5132702;5131691	-;-;-;-	OR52A5;OR52A5;OR52A5;OR52A5	ENSG00000171944.2;ENSG00000171944.2;ENSG00000171944.2;ENSG00000171944.2	protein_coding;protein_coding;protein_coding;protein_coding	2;2;2;2	2;2;2;2	OR52A5-202;OR52A5-202;OR52A5-201;OR52A5-201	None;None;NA;NA
11	5170857	exon	5170351	5171296	-	OR51A1P	ENSG00000176752.6	unprocessed_pseudogene	2	1	OR51A1P-201	NA
11	5301665	exon;CDS	5301014;5301014	5301946;5301946	-;-	OR51B4;OR51B4	ENSG00000183251.4;ENSG00000183251.4	protein_coding;protein_coding	2;2	1;1	OR51B4-201;OR51B4-201	NA;NA
11	5352176	exon;CDS	5351508;5351508	5352446;5352446	+;+	OR51B6;OR51B6	ENSG00000176239.7;ENSG00000176239.7	protein_coding;protein_coding	2;2	1;1	OR51B6-201;OR51B6-201	NA;NA
11	55344093	exon;CDS	55343151;55343201	55344231;55344187	+;+	OR4A16;OR4A16	ENSG00000181961.4;ENSG00000181961.4	protein_coding;protein_coding	2;2	1;1	OR4A16-201;OR4A16-201	NA;NA
11	55344110	exon;CDS	55343151;55343201	55344231;55344187	+;+	OR4A16;OR4A16	ENSG00000181961.4;ENSG00000181961.4	protein_coding;protein_coding	2;2	1;1	OR4A16-201;OR4A16-201	NA;NA
11	55344150	exon;CDS	55343151;55343201	55344231;55344187	+;+	OR4A16;OR4A16	ENSG00000181961.4;ENSG00000181961.4	protein_coding;protein_coding	2;2	1;1	OR4A16-201;OR4A16-201	NA;NA
11	55445161	exon	55444435	55445338	+	OR4A17P	ENSG00000255196.1	unprocessed_pseudogene	2	1	OR4A17P-201	NA
11	55607321	exon;five_prime_UTR	55607287;55607287	55607645;55607645	-;-	OR4C11;OR4C11	ENSG00000172188.5;ENSG00000172188.5	protein_coding;protein_coding	2;2	1;1	OR4C11-202;OR4C11-202	None;None
11	55979402	exon	55979398	55980103	-	OR7E5P	ENSG00000214880.3	unprocessed_pseudogene	1	1	OR7E5P-201	NA
11	56165607	exon	56165500	56165921	+	OR5J7P	ENSG00000255217.1	unprocessed_pseudogene	2	1	OR5J7P-201	NA
11	56478013	exon	56476287	56480462	-	OR5M2P	ENSG00000254752.2	transcribed_unprocessed_pseudogene	2	2	OR5M2P-202	None
11	5709597	exon;CDS	5709053;5709053	5710863;5709648	+;+	TRIM22;TRIM22	ENSG00000132274.16;ENSG00000132274.16	protein_coding;protein_coding	2;2	8;8	TRIM22-201;TRIM22-201	1;1
11	5738490	exon;three_prime_UTR	5736448;5737492	5738523;5738523	+;+	OR56B1;OR56B1	ENSG00000181023.8;ENSG00000181023.8	protein_coding;protein_coding	2;2	1;1	OR56B1-201;OR56B1-201	NA;NA
11	57600125	exon;CDS;exon;CDS;exon;CDS;exon;CDS;exon;CDS;exon;CDS	57599879;57599879;57599879;57599879;57599864;57599864;57599879;57599984;57599879;57599879;57599879;57599879	57600377;57600377;57600377;57600377;57600377;57600377;57600377;57600377;57600377;57600377;57600175;57600175	+;+;+;+;+;+;+;+;+;+;+;+	SERPING1;SERPING1;SERPING1;SERPING1;SERPING1;SERPING1;SERPING1;SERPING1;SERPING1;SERPING1;SERPING1;SERPING1	ENSG00000149131.16;ENSG00000149131.16;ENSG00000149131.16;ENSG00000149131.16;ENSG00000149131.16;ENSG00000149131.16;ENSG00000149131.16;ENSG00000149131.16;ENSG00000149131.16;ENSG00000149131.16;ENSG00000149131.16;ENSG00000149131.16	protein_coding;protein_coding;protein_coding;protein_coding;protein_coding;protein_coding;protein_coding;protein_coding;protein_coding;protein_coding;protein_coding;protein_coding	1;1;2;2;1;1;2;2;2;2;3;3	3;3;3;3;3;3;2;2;2;2;2;2	SERPING1-202;SERPING1-202;SERPING1-201;SERPING1-201;SERPING1-203;SERPING1-203;SERPING1-204;SERPING1-204;SERPING1-205;SERPING1-205;SERPING1-213;SERPING1-213	5;5;1;1;2;2;2;2;5;5;1;1
11	57647460	exon;five_prime_UTR;exon;five_prime_UTR	57646967;57647108;57647384;57647384	57649778;57649778;57647516;57647516	-;-;-;-	YPEL4;YPEL4;YPEL4;YPEL4	ENSG00000166793.12;ENSG00000166793.12;ENSG00000166793.12;ENSG00000166793.12	protein_coding;protein_coding;protein_coding;protein_coding	2;2;2;2	2;2;1;1	YPEL4-203;YPEL4-203;YPEL4-209;YPEL4-209	2;2;5;5
11	57712613	exon;five_prime_UTR;exon;five_prime_UTR;exon;five_prime_UTR	57712597;57712597;57712593;57712593;57712603;57712603	57712807;57712618;57712807;57712618;57712807;57712618	+;+;+;+;+;+	AP001931.2;AP001931.2;TMX2;TMX2;TMX2;TMX2	ENSG00000288534.1;ENSG00000288534.1;ENSG00000213593.10;ENSG00000213593.10;ENSG00000213593.10;ENSG00000213593.10	protein_coding;protein_coding;protein_coding;protein_coding;protein_coding;protein_coding	2;2;2;2;2;2	1;1;1;1;1;1	AP001931.2-203;AP001931.2-203;TMX2-201;TMX2-201;TMX2-202;TMX2-202	None;None;1;1;1;1
11	57862131	exon	57861948	57867258	-	OR5BA1P	ENSG00000255303.2	transcribed_unprocessed_pseudogene	2	3	OR5BA1P-202	None
11	57862301	exon	57861948	57867258	-	OR5BA1P	ENSG00000255303.2	transcribed_unprocessed_pseudogene	2	3	OR5BA1P-202	None
11	5788052	exon;CDS;exon;CDS	5786471;5787854;5787854;5787854	5788860;5788816;5788816;5788816	-;-;-;-	OR52N1;OR52N1;OR52N1;OR52N1	ENSG00000181001.2;ENSG00000181001.2;ENSG00000181001.2;ENSG00000181001.2	protein_coding;protein_coding;protein_coding;protein_coding	2;2;3;3	2;2;1;1	OR52N1-202;OR52N1-202;OR52N1-201;OR52N1-201	None;None;NA;NA
11	58193692	exon;three_prime_UTR	58190319;58191436	58194053;58194053	+;+	OR9Q2;OR9Q2	ENSG00000186513.3;ENSG00000186513.3	protein_coding;protein_coding	2;2	2;2	OR9Q2-202;OR9Q2-202	None;None
11	58491993	exon	58491773	58493119	-	AP003557.2	ENSG00000285895.1	lncRNA	2	2	AP003557.2-201	None
11	58956252	exon;three_prime_UTR;exon;three_prime_UTR	58955610;58956028;58955610;58956028	58956405;58956405;58957043;58957043	+;+;+;+	GLYATL1;GLYATL1;GLYATL1;GLYATL1	ENSG00000166840.13;ENSG00000166840.13;ENSG00000166840.13;ENSG00000166840.13	protein_coding;protein_coding;protein_coding;protein_coding	2;2;2;2	8;8;7;7	GLYATL1-202;GLYATL1-202;GLYATL1-201;GLYATL1-201	1;1;2;2
11	59058422	exon;exon	59058372;59058372	59058659;59058468	-;-	AP001636.3;AP001636.3	ENSG00000255240.6;ENSG00000255240.6	lncRNA;lncRNA	2;2	1;1	AP001636.3-201;AP001636.3-204	2;None
11	59125340	exon;CDS;exon;CDS;exon;CDS;exon;CDS	59124179;59124188;59124179;59124188;59124179;59124179;59124179;59124179	59127410;59126302;59126436;59126302;59127412;59126302;59127410;59126302	+;+;+;+;+;+;+;+	FAM111B;FAM111B;FAM111B;FAM111B;FAM111B;FAM111B;FAM111B;FAM111B	ENSG00000189057.11;ENSG00000189057.11;ENSG00000189057.11;ENSG00000189057.11;ENSG00000189057.11;ENSG00000189057.11;ENSG00000189057.11;ENSG00000189057.11	protein_coding;protein_coding;protein_coding;protein_coding;protein_coding;protein_coding;protein_coding;protein_coding	3;3;2;2;2;2;3;3	2;2;3;3;4;4;2;2	FAM111B-202;FAM111B-202;FAM111B-204;FAM111B-204;FAM111B-201;FAM111B-201;FAM111B-206;FAM111B-206	4;4;1;1;1;1;2;2
11	59127012	exon;three_prime_UTR;exon;three_prime_UTR;exon;three_prime_UTR	59124179;59126303;59124179;59126303;59124179;59126303	59127410;59127410;59127412;59127412;59127410;59127410	+;+;+;+;+;+	FAM111B;FAM111B;FAM111B;FAM111B;FAM111B;FAM111B	ENSG00000189057.11;ENSG00000189057.11;ENSG00000189057.11;ENSG00000189057.11;ENSG00000189057.11;ENSG00000189057.11	protein_coding;protein_coding;protein_coding;protein_coding;protein_coding;protein_coding	3;3;2;2;3;3	2;2;4;4;2;2	FAM111B-202;FAM111B-202;FAM111B-201;FAM111B-201;FAM111B-206;FAM111B-206	4;4;1;1;2;2
11	59209109	three_prime_UTR;exon	59208510;59208510	59210714;59212927	-;-	MPEG1;MPEG1	ENSG00000197629.6;ENSG00000197629.6	protein_coding;protein_coding	2;2	1;1	MPEG1-201;MPEG1-201	NA;NA
11	59365590	exon;three_prime_UTR;exon;three_prime_UTR	59364446;59365395;59364446;59365395	59371714;59371714;59371714;59371714	+;+;+;+	OR5AN1;OR5AN1;OR5AN1;OR5AN1	ENSG00000176495.3;ENSG00000176495.3;ENSG00000176495.3;ENSG00000176495.3	protein_coding;protein_coding;protein_coding;protein_coding	2;2;2;2	2;2;2;2	OR5AN1-203;OR5AN1-203;OR5AN1-202;OR5AN1-202	None;None;None;None
11	59367145	exon;three_prime_UTR;exon;three_prime_UTR	59364446;59365395;59364446;59365395	59371714;59371714;59371714;59371714	+;+;+;+	OR5AN1;OR5AN1;OR5AN1;OR5AN1	ENSG00000176495.3;ENSG00000176495.3;ENSG00000176495.3;ENSG00000176495.3	protein_coding;protein_coding;protein_coding;protein_coding	2;2;2;2	2;2;2;2	OR5AN1-203;OR5AN1-203;OR5AN1-202;OR5AN1-202	None;None;None;None
11	59367600	exon;three_prime_UTR;exon;three_prime_UTR	59364446;59365395;59364446;59365395	59371714;59371714;59371714;59371714	+;+;+;+	OR5AN1;OR5AN1;OR5AN1;OR5AN1	ENSG00000176495.3;ENSG00000176495.3;ENSG00000176495.3;ENSG00000176495.3	protein_coding;protein_coding;protein_coding;protein_coding	2;2;2;2	2;2;2;2	OR5AN1-203;OR5AN1-203;OR5AN1-202;OR5AN1-202	None;None;None;None
11	59448075	exon;three_prime_UTR	59443136;59444117	59451380;59451380	+;+	OR5A1;OR5A1	ENSG00000172320.3;ENSG00000172320.3	protein_coding;protein_coding	2;2	2;2	OR5A1-202;OR5A1-202	None;None
11	5951111	three_prime_UTR;three_prime_UTR;exon;exon	5948295;5948295;5947311;5947311	5951347;5951347;5951347;5951347	+;+;+;+	OR56A3;OR56A3;OR56A3;OR56A3	ENSG00000184478.7;ENSG00000184478.7;ENSG00000184478.7;ENSG00000184478.7	protein_coding;protein_coding;protein_coding;protein_coding	2;2;2;2	3;4;3;4	OR56A3-203;OR56A3-205;OR56A3-203;OR56A3-205	None;None;None;None
11	59565885	exon	59565765	59566283	-	LINC02739	ENSG00000255008.3	lncRNA	2	1	LINC02739-202	None
11	59754497	exon	59754280	59754718	-	AP000640.1	ENSG00000254477.2	lncRNA	2	1	AP000640.1-201	None
11	59802687	exon;three_prime_UTR;exon;three_prime_UTR	59800855;59800855;59800855;59800855	59802708;59802708;59805878;59805878	+;+;+;+	STX3;STX3;STX3;STX3	ENSG00000166900.17;ENSG00000166900.17;ENSG00000166900.17;ENSG00000166900.17	protein_coding;protein_coding;protein_coding;protein_coding	2;2;2;2	12;12;11;11	STX3-208;STX3-208;STX3-201;STX3-201	None;None;1;1
11	60542699	exon;three_prime_UTR;exon;three_prime_UTR;exon;three_prime_UTR	60542519;60542576;60542519;60542576;60542519;60542576	60542721;60542721;60542721;60542721;60542721;60542721	+;+;+;+;+;+	MS4A13;MS4A13;MS4A13;MS4A13;MS4A13;MS4A13	ENSG00000204979.8;ENSG00000204979.8;ENSG00000204979.8;ENSG00000204979.8;ENSG00000204979.8;ENSG00000204979.8	protein_coding;protein_coding;protein_coding;protein_coding;protein_coding;protein_coding	2;2;2;2;2;2	7;7;6;6;5;5	MS4A13-202;MS4A13-202;MS4A13-201;MS4A13-201;MS4A13-203;MS4A13-203	1;1;1;1;1;1
11	60703468	exon;CDS	60703378;60703378	60703500;60703500	+;+	MS4A8;MS4A8	ENSG00000166959.8;ENSG00000166959.8	protein_coding;protein_coding	2;2	3;3	MS4A8-201;MS4A8-201	1;1
11	60946669	exon;CDS	60946532;60946532	60946821;60946821	-;-	SLC15A3;SLC15A3	ENSG00000110446.11;ENSG00000110446.11	protein_coding;protein_coding	2;2	2;2	SLC15A3-201;SLC15A3-201	1;1
11	61258485	exon;three_prime_UTR;exon;three_prime_UTR	61258286;61258286;61258289;61258289	61259312;61258674;61258809;61258674	-;-;-;-	VWCE;VWCE;VWCE;VWCE	ENSG00000167992.13;ENSG00000167992.13;ENSG00000167992.13;ENSG00000167992.13	protein_coding;protein_coding;protein_coding;protein_coding	2;2;3;3	20;20;22;22	VWCE-202;VWCE-202;VWCE-208;VWCE-208	1;1;5;5
11	61346834	exon;three_prime_UTR	61346351;61346504	61349242;61349242	+;+	TKFC;TKFC	ENSG00000149476.15;ENSG00000149476.15	protein_coding;protein_coding	2;2	18;18	TKFC-201;TKFC-201	1;1
11	61637706	exon	61636585	61639449	+	RPLP0P2	ENSG00000243742.5	transcribed_processed_pseudogene	2	5	RPLP0P2-206	2
11	62516340	three_prime_UTR;exon	62515902;62515902	62516743;62534074	-;-	AHNAK;AHNAK	ENSG00000124942.14;ENSG00000124942.14	protein_coding;protein_coding	2;2	5;5	AHNAK-202;AHNAK-202	2;2
11	62581648	exon;CDS;exon;CDS;exon;CDS	62581386;62581386;62581386;62581386;62581386;62581386	62581701;62581701;62581701;62581701;62581701;62581701	-;-;-;-;-;-	AP002990.1;AP002990.1;TUT1;TUT1;TUT1;TUT1	ENSG00000255508.7;ENSG00000255508.7;ENSG00000149016.16;ENSG00000149016.16;ENSG00000149016.16;ENSG00000149016.16	protein_coding;protein_coding;protein_coding;protein_coding;protein_coding;protein_coding	2;2;3;3;2;2	3;3;3;3;3;3	AP002990.1-202;AP002990.1-202;TUT1-202;TUT1-202;TUT1-205;TUT1-205	2;2;1;1;1;1
11	62686501	exon;three_prime_UTR	62686406;62686406	62688513;62687791	-;-	LRRN4CL;LRRN4CL	ENSG00000177363.5;ENSG00000177363.5	protein_coding;protein_coding	2;2	2;2	LRRN4CL-201;LRRN4CL-201	1;1
11	6271193	exon;CDS;exon;CDS;exon;CDS	6271011;6271011;6271011;6271011;6270646;6270646	6272062;6271543;6272127;6271543;6272127;6271543	+;+;+;+;+;+	CCKBR;CCKBR;CCKBR;CCKBR;CCKBR;CCKBR	ENSG00000110148.10;ENSG00000110148.10;ENSG00000110148.10;ENSG00000110148.10;ENSG00000110148.10;ENSG00000110148.10	protein_coding;protein_coding;protein_coding;protein_coding;protein_coding;protein_coding	2;2;2;2;2;2	4;4;5;5;4;4	CCKBR-206;CCKBR-206;CCKBR-201;CCKBR-201;CCKBR-203;CCKBR-203	3;3;1;1;1;1
11	62855400	exon	62853801	62855745	-	SNHG1	ENSG00000255717.7	lncRNA	2	2	SNHG1-225	2
11	6297590	exon	6297189	6298606	-	AC068733.2	ENSG00000270435.1	processed_pseudogene	1	1	AC068733.2-201	NA
11	6297684	exon	6297189	6298606	-	AC068733.2	ENSG00000270435.1	processed_pseudogene	1	1	AC068733.2-201	NA
11	6298343	exon	6297189	6298606	-	AC068733.2	ENSG00000270435.1	processed_pseudogene	1	1	AC068733.2-201	NA
11	63369784	exon;five_prime_UTR	63369785;63369785	63370458;63370056	+;+	SLC22A9;SLC22A9	ENSG00000149742.10;ENSG00000149742.10	protein_coding;protein_coding	2;2	1;1	SLC22A9-201;SLC22A9-201	1;1
11	63461534	exon;three_prime_UTR	63461414;63461414	63463595;63463502	-;-	PLAAT5;PLAAT5	ENSG00000168004.9;ENSG00000168004.9	protein_coding;protein_coding	2;2	6;6	PLAAT5-206;PLAAT5-206	1;1
11	6362818	exon;exon	6362799;6362812	6363110;6365267	+;+	AC068733.1;AC068733.1	ENSG00000254443.1;ENSG00000254443.1	lncRNA;lncRNA	1;2	1;1	AC068733.1-201;AC068733.1-202	2;NA
11	63756122	exon;CDS;exon;CDS;exon;CDS;exon;CDS;exon;CDS;exon;CDS	63756112;63756112;63756112;63756112;63756112;63756112;63756112;63756112;63756112;63756112;63756112;63756112	63756170;63756170;63756170;63756170;63756170;63756170;63756170;63756170;63756170;63756170;63756170;63756170	+;+;+;+;+;+;+;+;+;+;+;+	RTN3;RTN3;RTN3;RTN3;RTN3;RTN3;RTN3;RTN3;RTN3;RTN3;RTN3;RTN3	ENSG00000133318.14;ENSG00000133318.14;ENSG00000133318.14;ENSG00000133318.14;ENSG00000133318.14;ENSG00000133318.14;ENSG00000133318.14;ENSG00000133318.14;ENSG00000133318.14;ENSG00000133318.14;ENSG00000133318.14;ENSG00000133318.14	protein_coding;protein_coding;protein_coding;protein_coding;protein_coding;protein_coding;protein_coding;protein_coding;protein_coding;protein_coding;protein_coding;protein_coding	3;3;2;2;2;2;2;2;2;2;2;2	7;7;7;7;7;7;8;8;6;6;3;3	RTN3-205;RTN3-205;RTN3-202;RTN3-202;RTN3-210;RTN3-210;RTN3-206;RTN3-206;RTN3-208;RTN3-208;RTN3-204;RTN3-204	2;2;1;1;1;1;1;1;1;1;2;2
11	63957205	exon;three_prime_UTR	63954338;63954480	63957319;63957319	+;+	NAA40;NAA40	ENSG00000110583.13;ENSG00000110583.13	protein_coding;protein_coding	2;2	8;8	NAA40-202;NAA40-202	1;1
11	64267645	exon;three_prime_UTR;exon;three_prime_UTR	64267353;64267557;64267353;64267557	64269398;64269398;64267923;64267923	+;+;+;+	PLCB3;PLCB3;PLCB3;PLCB3	ENSG00000149782.12;ENSG00000149782.12;ENSG00000149782.12;ENSG00000149782.12	protein_coding;protein_coding;protein_coding;protein_coding	2;2;2;2	31;31;29;29	PLCB3-201;PLCB3-201;PLCB3-202;PLCB3-202	1;1;1;1
11	64304625	exon;exon;CDS;exon;CDS	64304543;64304543;64304543;64304543;64304543	64304769;64304770;64304646;64304770;64304646	+;+;+;+;+	KCNK4-TEX40;CATSPERZ;CATSPERZ;CATSPERZ;CATSPERZ	ENSG00000257069.6;ENSG00000219435.6;ENSG00000219435.6;ENSG00000219435.6;ENSG00000219435.6	lncRNA;protein_coding;protein_coding;protein_coding;protein_coding	2;2;2;2;2	11;5;5;4;4	KCNK4-TEX40-201;CATSPERZ-201;CATSPERZ-201;CATSPERZ-203;CATSPERZ-203	1;1;1;2;2
11	64420556	exon;exon	64420311;64420535	64420622;64420561	+;+	AP003774.1;AP003774.1	ENSG00000231492.3;ENSG00000231492.3	lncRNA;lncRNA	2;2	1;1	AP003774.1-201;AP003774.1-203	None;3
11	64779243	exon	64778954	64779405	+	AP001462.1	ENSG00000269038.1	lncRNA	2	1	AP001462.1-201	NA
11	64803857	exon;three_prime_UTR;exon;three_prime_UTR;exon;three_prime_UTR;exon;three_prime_UTR;exon;three_prime_UTR;exon;three_prime_UTR;exon;three_prime_UTR;exon;three_prime_UTR;exon;three_prime_UTR;exon;three_prime_UTR;exon;three_prime_UTR	64803510;64803510;64803514;64803514;64803514;64803514;64803516;64803516;64803516;64803516;64803516;64803516;64803516;64803516;64803524;64803524;64803524;64803524;64803524;64803524;64803542;64803542	64804816;64804333;64804816;64804333;64804816;64804333;64804816;64804333;64804816;64804333;64804816;64804333;64804816;64804333;64804816;64804333;64804816;64804333;64804816;64804333;64804816;64804333	-;-;-;-;-;-;-;-;-;-;-;-;-;-;-;-;-;-;-;-;-;-	MEN1;MEN1;MEN1;MEN1;MEN1;MEN1;MEN1;MEN1;MEN1;MEN1;MEN1;MEN1;MEN1;MEN1;MEN1;MEN1;MEN1;MEN1;MEN1;MEN1;MEN1;MEN1	ENSG00000133895.16;ENSG00000133895.16;ENSG00000133895.16;ENSG00000133895.16;ENSG00000133895.16;ENSG00000133895.16;ENSG00000133895.16;ENSG00000133895.16;ENSG00000133895.16;ENSG00000133895.16;ENSG00000133895.16;ENSG00000133895.16;ENSG00000133895.16;ENSG00000133895.16;ENSG00000133895.16;ENSG00000133895.16;ENSG00000133895.16;ENSG00000133895.16;ENSG00000133895.16;ENSG00000133895.16;ENSG00000133895.16;…	protein_coding;protein_coding;protein_coding;protein_coding;protein_coding;protein_coding;protein_coding;protein_coding;protein_coding;protein_coding;protein_coding;protein_coding;protein_coding;protein_coding;protein_coding;protein_coding;protein_coding;protein_coding;protein_coding;protein_coding;protein_coding;protein_coding	1;1;2;2;2;2;2;2;2;2;2;2;2;2;3;3;3;3;3;3;2;2	8;8;9;9;10;10;10;10;10;10;9;9;10;10;10;10;10;10;11;11;11;11	MEN1-205;MEN1-205;MEN1-204;MEN1-204;MEN1-202;MEN1-202;MEN1-214;MEN1-214;MEN1-206;MEN1-206;MEN1-207;MEN1-207;MEN1-201;MEN1-201;MEN1-208;MEN1-208;MEN1-203;MEN1-203;MEN1-209;MEN1-209;MEN1-219;MEN1-219	5;5;2;2;5;5;5;5;1;1;5;5;1;1;5;5;5;5;5;5;None;None
11	64804234	exon;three_prime_UTR;exon;three_prime_UTR;exon;three_prime_UTR;exon;three_prime_UTR;exon;three_prime_UTR;exon;three_prime_UTR;exon;three_prime_UTR;exon;three_prime_UTR;exon;three_prime_UTR;exon;three_prime_UTR;exon;three_prime_UTR	64803510;64803510;64803514;64803514;64803514;64803514;64803516;64803516;64803516;64803516;64803516;64803516;64803516;64803516;64803524;64803524;64803524;64803524;64803524;64803524;64803542;64803542	64804816;64804333;64804816;64804333;64804816;64804333;64804816;64804333;64804816;64804333;64804816;64804333;64804816;64804333;64804816;64804333;64804816;64804333;64804816;64804333;64804816;64804333	-;-;-;-;-;-;-;-;-;-;-;-;-;-;-;-;-;-;-;-;-;-	MEN1;MEN1;MEN1;MEN1;MEN1;MEN1;MEN1;MEN1;MEN1;MEN1;MEN1;MEN1;MEN1;MEN1;MEN1;MEN1;MEN1;MEN1;MEN1;MEN1;MEN1;MEN1	ENSG00000133895.16;ENSG00000133895.16;ENSG00000133895.16;ENSG00000133895.16;ENSG00000133895.16;ENSG00000133895.16;ENSG00000133895.16;ENSG00000133895.16;ENSG00000133895.16;ENSG00000133895.16;ENSG00000133895.16;ENSG00000133895.16;ENSG00000133895.16;ENSG00000133895.16;ENSG00000133895.16;ENSG00000133895.16;ENSG00000133895.16;ENSG00000133895.16;ENSG00000133895.16;ENSG00000133895.16;ENSG00000133895.16;…	protein_coding;protein_coding;protein_coding;protein_coding;protein_coding;protein_coding;protein_coding;protein_coding;protein_coding;protein_coding;protein_coding;protein_coding;protein_coding;protein_coding;protein_coding;protein_coding;protein_coding;protein_coding;protein_coding;protein_coding;protein_coding;protein_coding	1;1;2;2;2;2;2;2;2;2;2;2;2;2;3;3;3;3;3;3;2;2	8;8;9;9;10;10;10;10;10;10;9;9;10;10;10;10;10;10;11;11;11;11	MEN1-205;MEN1-205;MEN1-204;MEN1-204;MEN1-202;MEN1-202;MEN1-214;MEN1-214;MEN1-206;MEN1-206;MEN1-207;MEN1-207;MEN1-201;MEN1-201;MEN1-208;MEN1-208;MEN1-203;MEN1-203;MEN1-209;MEN1-209;MEN1-219;MEN1-219	5;5;2;2;5;5;5;5;1;1;5;5;1;1;5;5;5;5;5;5;None;None
11	64852737	exon;three_prime_UTR;exon;three_prime_UTR;exon;three_prime_UTR	64851642;64851642;64852727;64852727;64852731;64852731	64854857;64854332;64854857;64854332;64854857;64854332	-;-;-;-;-;-	EHD1;EHD1;EHD1;EHD1;EHD1;EHD1	ENSG00000110047.18;ENSG00000110047.18;ENSG00000110047.18;ENSG00000110047.18;ENSG00000110047.18;ENSG00000110047.18	protein_coding;protein_coding;protein_coding;protein_coding;protein_coding;protein_coding	2;2;3;3;2;2	5;5;6;6;7;7	EHD1-201;EHD1-201;EHD1-213;EHD1-213;EHD1-202;EHD1-202	1;1;5;5;2;2
11	65174890	exon	65174117	65176470	-	PGAM1P8	ENSG00000255200.1	transcribed_processed_pseudogene	2	1	PGAM1P8-202	NA
11	65431919	exon	65422798	65445540	+	NEAT1	ENSG00000245532.9	lncRNA	2	1	NEAT1-202	NA
11	65438385	exon	65422798	65445540	+	NEAT1	ENSG00000245532.9	lncRNA	2	1	NEAT1-202	NA
11	65438617	exon	65422798	65445540	+	NEAT1	ENSG00000245532.9	lncRNA	2	1	NEAT1-202	NA
11	65498232	exon	65498010	65498405	-	AP000769.2	ENSG00000270117.1	lncRNA	2	1	AP000769.2-201	NA
11	65613684	exon;CDS	65613018;65613018	65614221;65613756	-;-	MAP3K11;MAP3K11	ENSG00000173327.8;ENSG00000173327.8	protein_coding;protein_coding	2;2	1;1	MAP3K11-201;MAP3K11-201	1;1
11	65716714	exon;CDS;exon;CDS;exon;CDS;exon;CDS;exon;CDS	65716667;65716667;65716667;65716667;65716667;65716667;65716667;65716667;65716667;65716667	65716807;65716807;65716807;65716807;65716807;65716807;65716807;65716807;65716807;65716807	+;+;+;+;+;+;+;+;+;+	KAT5;KAT5;KAT5;KAT5;KAT5;KAT5;KAT5;KAT5;KAT5;KAT5	ENSG00000172977.13;ENSG00000172977.13;ENSG00000172977.13;ENSG00000172977.13;ENSG00000172977.13;ENSG00000172977.13;ENSG00000172977.13;ENSG00000172977.13;ENSG00000172977.13;ENSG00000172977.13	protein_coding;protein_coding;protein_coding;protein_coding;protein_coding;protein_coding;protein_coding;protein_coding;protein_coding;protein_coding	2;2;2;2;2;2;2;2;2;2	10;10;9;9;8;8;9;9;7;7	KAT5-203;KAT5-203;KAT5-202;KAT5-202;KAT5-208;KAT5-208;KAT5-201;KAT5-201;KAT5-216;KAT5-216	1;1;1;1;1;1;1;1;1;1
11	65796156	exon;three_prime_UTR;exon	65795046;65795342;65795946	65797214;65797214;65796629	+;+;-	OVOL1;OVOL1;AP001266.1	ENSG00000172818.10;ENSG00000172818.10;ENSG00000255404.1	protein_coding;protein_coding;lncRNA	2;2;1	4;4;2	OVOL1-201;OVOL1-201;AP001266.1-201	1;1;2
11	6597604	exon;three_prime_UTR	6595072;6595072	6600265;6600145	-;-	RRP8;RRP8	ENSG00000132275.11;ENSG00000132275.11	protein_coding;protein_coding	2;2	7;7	RRP8-201;RRP8-201	1;1
11	66057320	exon;CDS;exon;CDS	66057266;66057266;66057266;66057266	66057375;66057375;66057375;66057375	+;+;+;+	SF3B2;SF3B2;SF3B2;SF3B2	ENSG00000087365.16;ENSG00000087365.16;ENSG00000087365.16;ENSG00000087365.16	protein_coding;protein_coding;protein_coding;protein_coding	1;1;2;2	6;6;7;7	SF3B2-206;SF3B2-206;SF3B2-201;SF3B2-201	5;5;1;1
11	66526682	exon;CDS;exon;CDS;exon;CDS;exon;CDS;exon;three_prime_UTR	66526649;66526649;66526649;66526649;66526649;66526649;66526649;66526649;66526649;66526649	66526807;66526807;66526807;66526807;66526807;66526807;66526807;66526807;66526807;66526807	+;+;+;+;+;+;+;+;+;+	AP002748.5;AP002748.5;BBS1;BBS1;BBS1;BBS1;BBS1;BBS1;BBS1;BBS1	ENSG00000256349.1;ENSG00000256349.1;ENSG00000174483.20;ENSG00000174483.20;ENSG00000174483.20;ENSG00000174483.20;ENSG00000174483.20;ENSG00000174483.20;ENSG00000174483.20;ENSG00000174483.20	protein_coding;protein_coding;protein_coding;protein_coding;protein_coding;protein_coding;protein_coding;protein_coding;protein_coding;protein_coding	1;1;2;2;2;2;1;1;3;3	13;13;13;13;9;9;10;10;12;12	AP002748.5-201;AP002748.5-201;BBS1-201;BBS1-201;BBS1-203;BBS1-203;BBS1-202;BBS1-202;BBS1-225;BBS1-225	2;2;1;1;2;2;1;1;5;5
11	66682587	exon;three_prime_UTR	66682497;66682497	66686104;66685870	-;-	SPTBN2;SPTBN2	ENSG00000173898.14;ENSG00000173898.14	protein_coding;protein_coding	2;2	38;38	SPTBN2-209;SPTBN2-209	5;5
11	66693421	exon;CDS;exon;CDS;exon;CDS	66693186;66693186;66693186;66693186;66693186;66693186	66693446;66693446;66693446;66693446;66693446;66693446	-;-;-;-;-;-	SPTBN2;SPTBN2;SPTBN2;SPTBN2;SPTBN2;SPTBN2	ENSG00000173898.14;ENSG00000173898.14;ENSG00000173898.14;ENSG00000173898.14;ENSG00000173898.14;ENSG00000173898.14	protein_coding;protein_coding;protein_coding;protein_coding;protein_coding;protein_coding	2;2;3;3;2;2	24;24;23;23;22;22	SPTBN2-209;SPTBN2-209;SPTBN2-201;SPTBN2-201;SPTBN2-204;SPTBN2-204	5;5;1;1;5;5
11	6713655	exon	6713536	6721882	-	GVINP1	ENSG00000254838.5	transcribed_unprocessed_pseudogene	1	2	GVINP1-201	1
11	67257597	exon;three_prime_UTR;exon;three_prime_UTR	67254874;67255056;67254874;67254874	67258082;67258082;67257665;67257665	+;+;+;+	KDM2A;KDM2A;KDM2A;KDM2A	ENSG00000173120.15;ENSG00000173120.15;ENSG00000173120.15;ENSG00000173120.15	protein_coding;protein_coding;protein_coding;protein_coding	2;2;2;2	21;21;21;21	KDM2A-210;KDM2A-210;KDM2A-202;KDM2A-202	1;1;1;1
11	67425540	exon;three_prime_UTR;exon;three_prime_UTR	67423375;67424602;67423375;67424602	67425607;67425607;67425605;67425605	+;+;+;+	CARNS1;CARNS1;CARNS1;CARNS1	ENSG00000172508.10;ENSG00000172508.10;ENSG00000172508.10;ENSG00000172508.10	protein_coding;protein_coding;protein_coding;protein_coding	2;2;3;3	9;9;9;9	CARNS1-201;CARNS1-201;CARNS1-202;CARNS1-202	1;1;5;5
11	67506540	exon;three_prime_UTR	67506497;67506497	67507012;67506944	-;-	CDK2AP2;CDK2AP2	ENSG00000167797.8;ENSG00000167797.8	protein_coding;protein_coding	2;2	4;4	CDK2AP2-201;CDK2AP2-201	1;1
11	6765970	exon;three_prime_UTR;exon;three_prime_UTR	6765626;6765626;6765626;6765626	6769494;6768006;6769491;6768006	-;-;-;-	OR2AG2;OR2AG2;OR2AG2;OR2AG2	ENSG00000188124.3;ENSG00000188124.3;ENSG00000188124.3;ENSG00000188124.3	protein_coding;protein_coding;protein_coding;protein_coding	2;2;2;2	2;2;2;2	OR2AG2-202;OR2AG2-202;OR2AG2-203;OR2AG2-203	None;None;None;None
11	67906124	exon	67906010	67906350	+	LINC02754	ENSG00000251637.6	lncRNA	2	3	LINC02754-203	3
11	6791152	exon;three_prime_UTR	6785018;6785989	6791558;6791558	+;+	OR2AG1;OR2AG1	ENSG00000279486.5;ENSG00000279486.5	protein_coding;protein_coding	2;2	2;2	OR2AG1-202;OR2AG1-202	None;None
11	68707513	exon;three_prime_UTR	68707440;68707440	68708500;68708307	-;-	TESMIN;TESMIN	ENSG00000132749.11;ENSG00000132749.11	protein_coding;protein_coding	2;2	10;10	TESMIN-201;TESMIN-201	1;1
11	6874309	exon;three_prime_UTR	6869623;6870667	6874717;6874717	+;+	OR10A2;OR10A2	ENSG00000170790.5;ENSG00000170790.5	protein_coding;protein_coding	2;2	2;2	OR10A2-202;OR10A2-202	None;None
11	6956348	exon;CDS;exon;CDS	6955690;6955690;6955690;6955690	6958047;6956531;6957848;6956531	+;+;+;+	ZNF215;ZNF215;ZNF215;ZNF215	ENSG00000149054.16;ENSG00000149054.16;ENSG00000149054.16;ENSG00000149054.16	protein_coding;protein_coding;protein_coding;protein_coding	2;2;2;2	7;7;6;6	ZNF215-201;ZNF215-201;ZNF215-202;ZNF215-202	1;1;5;5
11	69666310	exon;three_prime_UTR;exon;three_prime_UTR	69665563;69665563;69665566;69665566	69667587;69667518;69667587;69667518	-;-;-;-	LTO1;LTO1;LTO1;LTO1	ENSG00000149716.13;ENSG00000149716.13;ENSG00000149716.13;ENSG00000149716.13	protein_coding;protein_coding;protein_coding;protein_coding	2;2;2;2	5;5;3;3	LTO1-201;LTO1-201;LTO1-206;LTO1-206	1;1;1;1
11	6998111	exon;three_prime_UTR	6997085;6997085	7001555;6999861	-;-	ZNF214;ZNF214	ENSG00000149050.10;ENSG00000149050.10	protein_coding;protein_coding	2;2	3;3	ZNF214-201;ZNF214-201	1;1
11	7000689	exon;CDS;exon;CDS	6997085;6999862;6999363;6999862	7001555;7001555;7001555;7001555	-;-;-;-	ZNF214;ZNF214;ZNF214;ZNF214	ENSG00000149050.10;ENSG00000149050.10;ENSG00000149050.10;ENSG00000149050.10	protein_coding;protein_coding;protein_coding;protein_coding	2;2;3;3	3;3;4;4	ZNF214-201;ZNF214-201;ZNF214-204;ZNF214-204	1;1;1;1
11	70435295	exon;three_prime_UTR;exon;three_prime_UTR	70435026;70435163;70435026;70435163	70436584;70436584;70436575;70436575	+;+;+;+	CTTN;CTTN;CTTN;CTTN	ENSG00000085733.16;ENSG00000085733.16;ENSG00000085733.16;ENSG00000085733.16	protein_coding;protein_coding;protein_coding;protein_coding	2;2;2;2	17;17;18;18	CTTN-202;CTTN-202;CTTN-201;CTTN-201	1;1;1;1
11	70469915	exon;three_prime_UTR;exon;three_prime_UTR;exon;three_prime_UTR;exon;three_prime_UTR;exon;three_prime_UTR;exon;three_prime_UTR	70467856;70467856;70467856;70467856;70469435;70469435;70469435;70469435;70469435;70469435;70469435;70469435	70473439;70472868;70473439;70472868;70473439;70472868;70473439;70472868;70473439;70472868;70473439;70472868	-;-;-;-;-;-;-;-;-;-;-;-	SHANK2;SHANK2;SHANK2;SHANK2;SHANK2;SHANK2;SHANK2;SHANK2;SHANK2;SHANK2;SHANK2;SHANK2	ENSG00000162105.19;ENSG00000162105.19;ENSG00000162105.19;ENSG00000162105.19;ENSG00000162105.19;ENSG00000162105.19;ENSG00000162105.19;ENSG00000162105.19;ENSG00000162105.19;ENSG00000162105.19;ENSG00000162105.19;ENSG00000162105.19	protein_coding;protein_coding;protein_coding;protein_coding;protein_coding;protein_coding;protein_coding;protein_coding;protein_coding;protein_coding;protein_coding;protein_coding	3;3;2;2;2;2;2;2;2;2;2;2	10;10;10;10;11;11;13;13;16;16;25;25	SHANK2-211;SHANK2-211;SHANK2-203;SHANK2-203;SHANK2-201;SHANK2-201;SHANK2-225;SHANK2-225;SHANK2-224;SHANK2-224;SHANK2-218;SHANK2-218	5;5;1;1;5;5;None;None;None;None;5;5
11	71563389	exon	71563389	71563684	-	AP000867.5	ENSG00000286948.1	lncRNA	2	2	AP000867.5-201	None
11	71800890	exon;exon	71799561;71799561	71801234;71801237	+;+	FAM86C1P;FAM86C1P	ENSG00000158483.17;ENSG00000158483.17	transcribed_unprocessed_pseudogene;transcribed_unprocessed_pseudogene	2;2	4;5	FAM86C1P-201;FAM86C1P-202	1;2
11	72098142	exon;three_prime_UTR	72097348;72097348	72098415;72098198	-;-	LAMTOR1;LAMTOR1	ENSG00000149357.10;ENSG00000149357.10	protein_coding;protein_coding	2;2	4;4	LAMTOR1-204;LAMTOR1-204	2;2
11	72221487	exon;CDS;exon;CDS;exon;CDS	72221470;72221470;72221470;72221470;72221470;72221470	72221949;72221682;72221950;72221762;72221950;72221762	+;+;+;+;+;+	FOLR2;FOLR2;FOLR2;FOLR2;FOLR2;FOLR2	ENSG00000165457.14;ENSG00000165457.14;ENSG00000165457.14;ENSG00000165457.14;ENSG00000165457.14;ENSG00000165457.14	protein_coding;protein_coding;protein_coding;protein_coding;protein_coding;protein_coding	3;3;1;1;2;2	8;8;4;4;5;5	FOLR2-210;FOLR2-210;FOLR2-204;FOLR2-204;FOLR2-201;FOLR2-201	5;5;3;3;1;1
11	73675795	exon;three_prime_UTR;exon;three_prime_UTR	73675638;73675638;73675638;73675638	73677962;73677897;73677962;73677897	-;-;-;-	RAB6A;RAB6A;RAB6A;RAB6A	ENSG00000175582.20;ENSG00000175582.20;ENSG00000175582.20;ENSG00000175582.20	protein_coding;protein_coding;protein_coding;protein_coding	2;2;2;2	8;8;8;8	RAB6A-202;RAB6A-202;RAB6A-201;RAB6A-201	1;1;1;1
11	74103229	exon;CDS;exon;CDS	74103131;74103131;74103131;74103131	74103625;74103625;74103625;74103625	-;-;-;-	C2CD3;C2CD3;C2CD3;C2CD3	ENSG00000168014.16;ENSG00000168014.16;ENSG00000168014.16;ENSG00000168014.16	protein_coding;protein_coding;protein_coding;protein_coding	3;3;2;2	14;14;14;14	C2CD3-202;C2CD3-202;C2CD3-201;C2CD3-201	5;5;1;1
11	74333273	exon;three_prime_UTR	74330316;74330316	74336754;74336651	-;-	PGM2L1;PGM2L1	ENSG00000165434.8;ENSG00000165434.8	protein_coding;protein_coding	2;2	14;14	PGM2L1-201;PGM2L1-201	1;1
11	74642821	exon;three_prime_UTR	74640564;74640767	74643076;74643076	+;+	POLD3;POLD3	ENSG00000077514.9;ENSG00000077514.9	protein_coding;protein_coding	2;2	12;12	POLD3-201;POLD3-201	1;1
11	74745730	exon	74745716	74746114	-	AP001324.1	ENSG00000227615.1	processed_pseudogene	2	1	AP001324.1-201	NA
11	75004363	exon;CDS	75004305;75004305	75004405;75004405	+;+	NEU3;NEU3	ENSG00000162139.10;ENSG00000162139.10	protein_coding;protein_coding	2;2	3;3	NEU3-205;NEU3-205	5;5
11	75228466	exon	75228322	75228657	-	ZDHHC20P3	ENSG00000255460.1	processed_pseudogene	1	1	ZDHHC20P3-201	NA
11	75603615	exon;three_prime_UTR	75602860;75602860	75606004;75605803	-;-	MAP6;MAP6	ENSG00000171533.11;ENSG00000171533.11	protein_coding;protein_coding	2;2	3;3	MAP6-202;MAP6-202	1;1
11	75731453	exon;three_prime_UTR;exon;three_prime_UTR	75731132;75731287;75731132;75731287	75732953;75732953;75732958;75732958	+;+;+;+	MOGAT2;MOGAT2;MOGAT2;MOGAT2	ENSG00000166391.15;ENSG00000166391.15;ENSG00000166391.15;ENSG00000166391.15	protein_coding;protein_coding;protein_coding;protein_coding	2;2;2;2	6;6;5;5	MOGAT2-201;MOGAT2-201;MOGAT2-203;MOGAT2-203	1;1;2;2
11	76408108	exon;three_prime_UTR	76403660;76404043	76408136;76408136	+;+	GVQW3;GVQW3	ENSG00000179240.12;ENSG00000179240.12	protein_coding;protein_coding	1;1	2;2	GVQW3-201;GVQW3-201	1;1
11	76658550	three_prime_UTR;three_prime_UTR;exon;exon	76657524;76657525;76657524;76657525	76659603;76659603;76661508;76661508	-;-;-;-	LRRC32;LRRC32;LRRC32;LRRC32	ENSG00000137507.11;ENSG00000137507.11;ENSG00000137507.11;ENSG00000137507.11	protein_coding;protein_coding;protein_coding;protein_coding	2;3;2;3	3;3;3;3	LRRC32-201;LRRC32-203;LRRC32-201;LRRC32-203	1;1;1;1
11	7695684	exon;CDS;exon;CDS	7695570;7695570;7695570;7695570	7695710;7695710;7695710;7695710	-;-;-;-	OVCH2;OVCH2;OVCH2;OVCH2	ENSG00000183378.12;ENSG00000183378.12;ENSG00000183378.12;ENSG00000183378.12	protein_coding;protein_coding;protein_coding;protein_coding	2;2;3;3	11;11;11;11	OVCH2-201;OVCH2-201;OVCH2-203;OVCH2-203	5;5;5;5
11	77118321	exon;CDS;exon;CDS;exon;CDS	77118157;77118157;77118157;77118157;77118157;77118157	77118352;77118352;77118352;77118352;77118352;77118352	+;+;+;+;+;+	CAPN5;CAPN5;CAPN5;CAPN5;CAPN5;CAPN5	ENSG00000149260.18;ENSG00000149260.18;ENSG00000149260.18;ENSG00000149260.18;ENSG00000149260.18;ENSG00000149260.18	protein_coding;protein_coding;protein_coding;protein_coding;protein_coding;protein_coding	2;2;2;2;1;1	8;8;9;9;9;9	CAPN5-207;CAPN5-207;CAPN5-204;CAPN5-204;CAPN5-201;CAPN5-201	None;None;1;1;2;2
11	77184977	exon;three_prime_UTR	77184804;77184837	77184989;77184989	+;+	MYO7A;MYO7A	ENSG00000137474.22;ENSG00000137474.22	protein_coding;protein_coding	3;3	29;29	MYO7A-211;MYO7A-211	5;5
11	77313818	exon	77313606	77314032	+	TOMM20P1	ENSG00000224829.3	processed_pseudogene	1	1	TOMM20P1-201	NA
11	77475073	exon	77473371	77477030	+	AP003680.1	ENSG00000268635.2	lncRNA	2	1	AP003680.1-201	NA
11	78069931	exon;three_prime_UTR;exon;three_prime_UTR;exon;three_prime_UTR	78069856;78069856;78069858;78069858;78068297;78068297	78070036;78069986;78070036;78069986;78070036;78069986	-;-;-;-;-;-	NDUFC2;NDUFC2;NDUFC2;NDUFC2;NDUFC2;NDUFC2	ENSG00000151366.13;ENSG00000151366.13;ENSG00000151366.13;ENSG00000151366.13;ENSG00000151366.13;ENSG00000151366.13	protein_coding;protein_coding;protein_coding;protein_coding;protein_coding;protein_coding	2;2;2;2;2;2	2;2;3;3;3;3	NDUFC2-205;NDUFC2-205;NDUFC2-202;NDUFC2-202;NDUFC2-201;NDUFC2-201	2;2;3;3;1;1
11	78069968	exon;three_prime_UTR;exon;three_prime_UTR;exon;three_prime_UTR	78069856;78069856;78069858;78069858;78068297;78068297	78070036;78069986;78070036;78069986;78070036;78069986	-;-;-;-;-;-	NDUFC2;NDUFC2;NDUFC2;NDUFC2;NDUFC2;NDUFC2	ENSG00000151366.13;ENSG00000151366.13;ENSG00000151366.13;ENSG00000151366.13;ENSG00000151366.13;ENSG00000151366.13	protein_coding;protein_coding;protein_coding;protein_coding;protein_coding;protein_coding	2;2;2;2;2;2	2;2;3;3;3;3	NDUFC2-205;NDUFC2-205;NDUFC2-202;NDUFC2-202;NDUFC2-201;NDUFC2-201	2;2;3;3;1;1
11	78443835	exon	78443648	78444049	+	AP003086.1	ENSG00000254420.1	lncRNA	2	2	AP003086.1-201	3
11	8107901	exon;three_prime_UTR;exon;three_prime_UTR	8106056;8106056;8106093;8106093	8111137;8110697;8111137;8110697	-;-;-;-	RIC3;RIC3;RIC3;RIC3	ENSG00000166405.15;ENSG00000166405.15;ENSG00000166405.15;ENSG00000166405.15	protein_coding;protein_coding;protein_coding;protein_coding	2;2;2;2	6;6;2;2	RIC3-201;RIC3-201;RIC3-202;RIC3-202	1;1;1;1
11	8139670	exon;three_prime_UTR	8139054;8139054	8140193;8139930	-;-	RIC3;RIC3	ENSG00000166405.15;ENSG00000166405.15	protein_coding;protein_coding	2;2	2;2	RIC3-204;RIC3-204	1;1
11	81430921	exon	81428331	81431520	+	AP003464.1	ENSG00000287912.1	lncRNA	2	5	AP003464.1-201	None
11	8176773	exon	8175297	8178903	+	RIC3-DT	ENSG00000246820.2	lncRNA	2	3	RIC3-DT-201	2
11	82805914	exon	82805354	82806509	+	AP001646.2	ENSG00000255063.1	processed_pseudogene	1	1	AP001646.2-201	NA
11	82978337	exon;three_prime_UTR;exon;three_prime_UTR;exon;three_prime_UTR	82973133;82973133;82973133;82973133;82973133;82973133	82982415;82982164;82982415;82982164;82982415;82982164	-;-;-;-;-;-	RAB30;RAB30;RAB30;RAB30;RAB30;RAB30	ENSG00000137502.10;ENSG00000137502.10;ENSG00000137502.10;ENSG00000137502.10;ENSG00000137502.10;ENSG00000137502.10	protein_coding;protein_coding;protein_coding;protein_coding;protein_coding;protein_coding	3;3;2;2;2;2	5;5;6;6;5;5	RAB30-216;RAB30-216;RAB30-212;RAB30-212;RAB30-205;RAB30-205	3;3;1;1;1;1
11	82981889	exon;three_prime_UTR;exon;three_prime_UTR;exon;three_prime_UTR;exon;three_prime_UTR;exon;three_prime_UTR	82973133;82973133;82973133;82973133;82973133;82973133;82979268;82979268;82981790;82981790	82982415;82982164;82982415;82982164;82982415;82982164;82982415;82982277;82982415;82982164	-;-;-;-;-;-;-;-;-;-	RAB30;RAB30;RAB30;RAB30;RAB30;RAB30;RAB30;RAB30;RAB30;RAB30	ENSG00000137502.10;ENSG00000137502.10;ENSG00000137502.10;ENSG00000137502.10;ENSG00000137502.10;ENSG00000137502.10;ENSG00000137502.10;ENSG00000137502.10;ENSG00000137502.10;ENSG00000137502.10	protein_coding;protein_coding;protein_coding;protein_coding;protein_coding;protein_coding;protein_coding;protein_coding;protein_coding;protein_coding	3;3;2;2;2;2;2;2;2;2	5;5;6;6;5;5;5;5;5;5	RAB30-216;RAB30-216;RAB30-212;RAB30-212;RAB30-205;RAB30-205;RAB30-214;RAB30-214;RAB30-201;RAB30-201	3;3;1;1;1;1;1;1;2;2
11	83041467	exon	83041464	83041598	-	SNORA70E	ENSG00000207221.1	snoRNA	3	1	SNORA70E-201	NA
11	8464819	exon;CDS;exon;CDS;exon;CDS;exon;five_prime_UTR;exon;CDS	8464709;8464709;8464709;8464709;8464709;8464709;8464709;8464709;8464709;8464709	8464822;8464822;8464822;8464822;8464822;8464822;8464822;8464822;8464822;8464822	-;-;-;-;-;-;-;-;-;-	STK33;STK33;STK33;STK33;STK33;STK33;STK33;STK33;STK33;STK33	ENSG00000130413.15;ENSG00000130413.15;ENSG00000130413.15;ENSG00000130413.15;ENSG00000130413.15;ENSG00000130413.15;ENSG00000130413.15;ENSG00000130413.15;ENSG00000130413.15;ENSG00000130413.15	protein_coding;protein_coding;protein_coding;protein_coding;protein_coding;protein_coding;protein_coding;protein_coding;protein_coding;protein_coding	2;2;2;2;2;2;2;2;2;2	3;3;5;5;4;4;2;2;5;5	STK33-208;STK33-208;STK33-201;STK33-201;STK33-203;STK33-203;STK33-202;STK33-202;STK33-217;STK33-217	1;1;1;1;2;2;2;2;2;2
11	84923433	exon;five_prime_UTR	84923077;84923119	84923589;84923589	-;-	DLG2;DLG2	ENSG00000150672.17;ENSG00000150672.17	protein_coding;protein_coding	2;2	1;1	DLG2-207;DLG2-207	1;1
11	85634085	exon;CDS;exon;CDS;exon;CDS	85634086;85634086;85634086;85634086;85634086;85634086	85634279;85634279;85634279;85634279;85634279;85634279	+;+;+;+;+;+	TMEM126B;TMEM126B;TMEM126B;TMEM126B;TMEM126B;TMEM126B	ENSG00000171204.13;ENSG00000171204.13;ENSG00000171204.13;ENSG00000171204.13;ENSG00000171204.13;ENSG00000171204.13	protein_coding;protein_coding;protein_coding;protein_coding;protein_coding;protein_coding	3;3;2;2;2;2	4;4;3;3;3;3	TMEM126B-202;TMEM126B-202;TMEM126B-201;TMEM126B-201;TMEM126B-211;TMEM126B-211	1;1;2;2;2;2
11	85635689	exon;CDS;exon;CDS;exon;CDS	85635667;85635667;85635667;85635667;85635667;85635667	85635778;85635778;85635778;85635778;85636536;85635782	+;+;+;+;+;+	TMEM126B;TMEM126B;TMEM126B;TMEM126B;TMEM126B;TMEM126B	ENSG00000171204.13;ENSG00000171204.13;ENSG00000171204.13;ENSG00000171204.13;ENSG00000171204.13;ENSG00000171204.13	protein_coding;protein_coding;protein_coding;protein_coding;protein_coding;protein_coding	3;3;2;2;2;2	5;5;4;4;4;4	TMEM126B-202;TMEM126B-202;TMEM126B-201;TMEM126B-201;TMEM126B-211;TMEM126B-211	1;1;2;2;2;2
11	86837251	exon	86836819	86837615	+	AP000654.1	ENSG00000269895.1	lncRNA	2	2	AP000654.1-201	5
11	87096121	exon	87094734	87096585	-	XIAPP2	ENSG00000254843.1	processed_pseudogene	1	1	XIAPP2-201	NA
11	88506974	exon;exon;three_prime_UTR	88504576;88504576;88504576	88508939;88509504;88508591	+;-;-	GRM5-AS1;GRM5;GRM5	ENSG00000255082.1;ENSG00000168959.14;ENSG00000168959.14	lncRNA;protein_coding;protein_coding	2;3;3	1;9;9	GRM5-AS1-201;GRM5-205;GRM5-205	5;2;2
11	88507609	exon;exon;three_prime_UTR	88504576;88504576;88504576	88508939;88509504;88508591	+;-;-	GRM5-AS1;GRM5;GRM5	ENSG00000255082.1;ENSG00000168959.14;ENSG00000168959.14	lncRNA;protein_coding;protein_coding	2;3;3	1;9;9	GRM5-AS1-201;GRM5-205;GRM5-205	5;2;2
11	8917495	exon;three_prime_UTR;exon;three_prime_UTR;exon;three_prime_UTR	8917287;8917467;8917287;8917467;8917287;8917467	8918119;8918119;8917748;8917748;8917504;8917504	+;+;+;+;+;+	AKIP1;AKIP1;AKIP1;AKIP1;AKIP1;AKIP1	ENSG00000166452.12;ENSG00000166452.12;ENSG00000166452.12;ENSG00000166452.12;ENSG00000166452.12;ENSG00000166452.12	protein_coding;protein_coding;protein_coding;protein_coding;protein_coding;protein_coding	2;2;2;2;2;2	3;3;4;4;4;4	AKIP1-207;AKIP1-207;AKIP1-206;AKIP1-206;AKIP1-211;AKIP1-211	2;2;2;2;3;3
11	8919381	exon;CDS;exon;CDS;exon;CDS;exon;CDS;exon;CDS	8919337;8919337;8919337;8919337;8919337;8919337;8919337;8919337;8919337;8919337	8920084;8919480;8920084;8919480;8920079;8919480;8919900;8919480;8919862;8919480	+;+;+;+;+;+;+;+;+;+	AKIP1;AKIP1;AKIP1;AKIP1;AKIP1;AKIP1;AKIP1;AKIP1;AKIP1;AKIP1	ENSG00000166452.12;ENSG00000166452.12;ENSG00000166452.12;ENSG00000166452.12;ENSG00000166452.12;ENSG00000166452.12;ENSG00000166452.12;ENSG00000166452.12;ENSG00000166452.12;ENSG00000166452.12	protein_coding;protein_coding;protein_coding;protein_coding;protein_coding;protein_coding;protein_coding;protein_coding;protein_coding;protein_coding	2;2;2;2;2;2;2;2;2;2	5;5;5;5;6;6;4;4;5;5	AKIP1-201;AKIP1-201;AKIP1-202;AKIP1-202;AKIP1-203;AKIP1-203;AKIP1-204;AKIP1-204;AKIP1-210;AKIP1-210	1;1;1;1;1;1;2;2;1;1
11	89293806	exon	89293745	89294246	-	CBX3P7	ENSG00000197692.5	processed_pseudogene	1	1	CBX3P7-201	NA
11	89714197	exon;CDS	89714192;89714192	89714422;89714422	+;+	TRIM77;TRIM77	ENSG00000214414.9;ENSG00000214414.9	protein_coding;protein_coding	2;2	3;3	TRIM77-201;TRIM77-201	5;5
11	89797687	exon;three_prime_UTR	89797655;89797655	89798629;89798129	-;-	TRIM49;TRIM49	ENSG00000168930.13;ENSG00000168930.13	protein_coding;protein_coding	2;2	8;8	TRIM49-201;TRIM49-201	1;1
11	89797723	exon;three_prime_UTR	89797655;89797655	89798629;89798129	-;-	TRIM49;TRIM49	ENSG00000168930.13;ENSG00000168930.13	protein_coding;protein_coding	2;2	8;8	TRIM49-201;TRIM49-201	1;1
11	90062825	exon	90062609	90062999	-	TRIM64EP	ENSG00000223709.6	unprocessed_pseudogene	2	1	TRIM64EP-201	NA
11	90200545	exon;three_prime_UTR	90200429;90200429	90202551;90202404	-;-	CHORDC1;CHORDC1	ENSG00000110172.12;ENSG00000110172.12	protein_coding;protein_coding	2;2	11;11	CHORDC1-201;CHORDC1-201	1;1
11	90207787	exon;five_prime_UTR	90205460;90205565	90209478;90209478	-;-	CHORDC1;CHORDC1	ENSG00000110172.12;ENSG00000110172.12	protein_coding;protein_coding	2;2	1;1	CHORDC1-205;CHORDC1-205	2;2
11	9020975	exon;three_prime_UTR;exon;three_prime_UTR;exon;three_prime_UTR;exon;three_prime_UTR	9019498;9019498;9020391;9020391;9020575;9020575;9020884;9020884	9021197;9021044;9021197;9021044;9021197;9021044;9021197;9021044	-;-;-;-;-;-;-;-	SCUBE2;SCUBE2;SCUBE2;SCUBE2;SCUBE2;SCUBE2;SCUBE2;SCUBE2	ENSG00000175356.13;ENSG00000175356.13;ENSG00000175356.13;ENSG00000175356.13;ENSG00000175356.13;ENSG00000175356.13;ENSG00000175356.13;ENSG00000175356.13	protein_coding;protein_coding;protein_coding;protein_coding;protein_coding;protein_coding;protein_coding;protein_coding	2;2;2;2;2;2;1;1	23;23;22;22;18;18;22;22	SCUBE2-214;SCUBE2-214;SCUBE2-201;SCUBE2-201;SCUBE2-202;SCUBE2-202;SCUBE2-207;SCUBE2-207	None;None;5;5;1;1;2;2
11	90224877	exon	90223153	90226538	+	AP002364.1	ENSG00000280367.1	TEC	2	1	AP002364.1-201	NA
11	90225536	exon	90223153	90226538	+	AP002364.1	ENSG00000280367.1	TEC	2	1	AP002364.1-201	NA
11	90225574	exon	90223153	90226538	+	AP002364.1	ENSG00000280367.1	TEC	2	1	AP002364.1-201	NA
11	9281854	exon;three_prime_UTR	9280654;9280654	9283593;9283423	-;-	TMEM41B;TMEM41B	ENSG00000166471.11;ENSG00000166471.11	protein_coding;protein_coding	2;2	7;7	TMEM41B-204;TMEM41B-204	1;1
11	93408404	exon;CDS;exon;CDS	93408231;93408231;93408231;93408231	93408427;93408427;93408427;93408427	+;+;+;+	DEUP1;DEUP1;DEUP1;DEUP1	ENSG00000165325.13;ENSG00000165325.13;ENSG00000165325.13;ENSG00000165325.13	protein_coding;protein_coding;protein_coding;protein_coding	3;3;2;2	12;12;6;6	DEUP1-201;DEUP1-201;DEUP1-202;DEUP1-202	5;5;1;1
11	9438080	exon;CDS	9438080;9438080	9438285;9438285	+;+	IPO7;IPO7	ENSG00000205339.10;ENSG00000205339.10	protein_coding;protein_coding	2;2	22;22	IPO7-201;IPO7-201	1;1
11	95025460	five_prime_UTR;exon	95025258;95025258	95025557;95027596	+;+	KDM4E;KDM4E	ENSG00000235268.2;ENSG00000235268.2	protein_coding;protein_coding	2;2	1;1	KDM4E-201;KDM4E-201	NA;NA
11	95131385	exon;three_prime_UTR	95128377;95129580	95132645;95132645	+;+	ENDOD1;ENDOD1	ENSG00000149218.5;ENSG00000149218.5	protein_coding;protein_coding	2;2	2;2	ENDOD1-201;ENDOD1-201	1;1
11	95169545	exon;three_prime_UTR	95165513;95165513	95173341;95173254	-;-	SESN3;SESN3	ENSG00000149212.12;ENSG00000149212.12	protein_coding;protein_coding	2;2	10;10	SESN3-203;SESN3-203	2;2
11	9527719	exon;three_prime_UTR;exon;three_prime_UTR;exon;three_prime_UTR	9527530;9527614;9527530;9527614;9527530;9527614	9528054;9528054;9528524;9528524;9528281;9528281	+;+;+;+;+;+	ZNF143;ZNF143;ZNF143;ZNF143;ZNF143;ZNF143	ENSG00000166478.10;ENSG00000166478.10;ENSG00000166478.10;ENSG00000166478.10;ENSG00000166478.10;ENSG00000166478.10	protein_coding;protein_coding;protein_coding;protein_coding;protein_coding;protein_coding	2;2;2;2;1;1	16;16;16;16;15;15	ZNF143-204;ZNF143-204;ZNF143-203;ZNF143-203;ZNF143-201;ZNF143-201	5;5;1;1;5;5
11	9589038	exon;three_prime_UTR;exon;three_prime_UTR	9588449;9588603;9588449;9588603	9589985;9589985;9589984;9589984	+;+;+;+	WEE1;WEE1;WEE1;WEE1	ENSG00000166483.11;ENSG00000166483.11;ENSG00000166483.11;ENSG00000166483.11	protein_coding;protein_coding;protein_coding;protein_coding	2;2;2;2	11;11;11;11	WEE1-202;WEE1-202;WEE1-201;WEE1-201	1;1;2;2
11	9589287	exon;three_prime_UTR;exon;three_prime_UTR	9588449;9588603;9588449;9588603	9589985;9589985;9589984;9589984	+;+;+;+	WEE1;WEE1;WEE1;WEE1	ENSG00000166483.11;ENSG00000166483.11;ENSG00000166483.11;ENSG00000166483.11	protein_coding;protein_coding;protein_coding;protein_coding	2;2;2;2	11;11;11;11	WEE1-202;WEE1-202;WEE1-201;WEE1-201	1;1;2;2
11	96358284	exon;three_prime_UTR	96353250;96353250	96358619;96358571	-;-	CCDC82;CCDC82	ENSG00000149231.15;ENSG00000149231.15	protein_coding;protein_coding	2;2	10;10	CCDC82-209;CCDC82-209	None;None
11	96382833	exon;three_prime_UTR	96380539;96380539	96383473;96383224	-;-	CCDC82;CCDC82	ENSG00000149231.15;ENSG00000149231.15	protein_coding;protein_coding	2;2	5;5	CCDC82-205;CCDC82-205	2;2
12	10017430	exon;three_prime_UTR	10015612;10015747	10017948;10017948	+;+	CLEC12B;CLEC12B	ENSG00000256660.6;ENSG00000256660.6	protein_coding;protein_coding	2;2	5;5	CLEC12B-202;CLEC12B-202	1;1
12	100180669	exon;exon;exon	100180553;100180553;100180553	100180716;100180716;100180716	-;-;-	AC010203.1;AC010203.1;AC010203.1	ENSG00000257489.6;ENSG00000257489.6;ENSG00000257489.6	transcribed_unprocessed_pseudogene;transcribed_unprocessed_pseudogene;transcribed_unprocessed_pseudogene	2;2;2	3;3;2	AC010203.1-201;AC010203.1-202;AC010203.1-204	3;3;NA
12	100421008	exon;three_prime_UTR	100419815;100420160	100422055;100422055	+;+	SLC17A8;SLC17A8	ENSG00000179520.11;ENSG00000179520.11	protein_coding;protein_coding	2;2	12;12	SLC17A8-201;SLC17A8-201	1;1
12	100618464	exon;CDS;exon;CDS;exon;CDS;exon;CDS	100618449;100618449;100618449;100618449;100618449;100618449;100618449;100618449	100618587;100618587;100618587;100618587;100618587;100618587;100618587;100618587	+;+;+;+;+;+;+;+	GAS2L3;GAS2L3;GAS2L3;GAS2L3;GAS2L3;GAS2L3;GAS2L3;GAS2L3	ENSG00000139354.11;ENSG00000139354.11;ENSG00000139354.11;ENSG00000139354.11;ENSG00000139354.11;ENSG00000139354.11;ENSG00000139354.11;ENSG00000139354.11	protein_coding;protein_coding;protein_coding;protein_coding;protein_coding;protein_coding;protein_coding;protein_coding	2;2;2;2;1;1;3;3	7;7;8;8;8;8;6;6	GAS2L3-201;GAS2L3-201;GAS2L3-205;GAS2L3-205;GAS2L3-202;GAS2L3-202;GAS2L3-203;GAS2L3-203	1;1;1;1;2;2;2;2
12	101155500	exon;three_prime_UTR	101155493;101155493	101157401;101157278	-;-	SLC5A8;SLC5A8	ENSG00000256870.3;ENSG00000256870.3	protein_coding;protein_coding	2;2	15;15	SLC5A8-201;SLC5A8-201	1;1
12	101395354	exon;three_prime_UTR;exon;three_prime_UTR;exon;three_prime_UTR	101393116;101393116;101394918;101394918;101394944;101394944	101395670;101395639;101395670;101395639;101395670;101395639	-;-;-;-;-;-	ARL1;ARL1;ARL1;ARL1;ARL1;ARL1	ENSG00000120805.14;ENSG00000120805.14;ENSG00000120805.14;ENSG00000120805.14;ENSG00000120805.14;ENSG00000120805.14	protein_coding;protein_coding;protein_coding;protein_coding;protein_coding;protein_coding	2;2;2;2;2;2	6;6;5;5;6;6	ARL1-201;ARL1-201;ARL1-203;ARL1-203;ARL1-202;ARL1-202	1;1;2;2;2;2
12	101714195	exon;CDS;exon;CDS	101714090;101714090;101714090;101714090	101714237;101714237;101714237;101714237	+;+;+;+	CHPT1;CHPT1;CHPT1;CHPT1	ENSG00000111666.11;ENSG00000111666.11;ENSG00000111666.11;ENSG00000111666.11	protein_coding;protein_coding;protein_coding;protein_coding	2;2;2;2	2;2;2;2	CHPT1-201;CHPT1-201;CHPT1-205;CHPT1-205	1;1;5;5
12	102210442	exon	102197585	102402596	+	HELLPAR	ENSG00000281344.1	lncRNA	2	1	HELLPAR-201	NA
12	102250648	exon	102197585	102402596	+	HELLPAR	ENSG00000281344.1	lncRNA	2	1	HELLPAR-201	NA
12	102265742	exon	102197585	102402596	+	HELLPAR	ENSG00000281344.1	lncRNA	2	1	HELLPAR-201	NA
12	102276753	exon	102197585	102402596	+	HELLPAR	ENSG00000281344.1	lncRNA	2	1	HELLPAR-201	NA
12	102296389	exon	102197585	102402596	+	HELLPAR	ENSG00000281344.1	lncRNA	2	1	HELLPAR-201	NA
12	102297505	exon	102197585	102402596	+	HELLPAR	ENSG00000281344.1	lncRNA	2	1	HELLPAR-201	NA
12	102303424	exon	102197585	102402596	+	HELLPAR	ENSG00000281344.1	lncRNA	2	1	HELLPAR-201	NA
12	102324939	exon	102197585	102402596	+	HELLPAR	ENSG00000281344.1	lncRNA	2	1	HELLPAR-201	NA
12	102359218	exon	102197585	102402596	+	HELLPAR	ENSG00000281344.1	lncRNA	2	1	HELLPAR-201	NA
12	102373138	exon	102197585	102402596	+	HELLPAR	ENSG00000281344.1	lncRNA	2	1	HELLPAR-201	NA
12	102374149	exon	102197585	102402596	+	HELLPAR	ENSG00000281344.1	lncRNA	2	1	HELLPAR-201	NA
12	102377541	exon	102197585	102402596	+	HELLPAR	ENSG00000281344.1	lncRNA	2	1	HELLPAR-201	NA
12	102389688	exon	102197585	102402596	+	HELLPAR	ENSG00000281344.1	lncRNA	2	1	HELLPAR-201	NA
12	102395262	exon	102197585	102402596	+	HELLPAR	ENSG00000281344.1	lncRNA	2	1	HELLPAR-201	NA
12	103119903	exon	103119698	103120010	-	AC068643.1	ENSG00000257703.6	lncRNA	2	5	AC068643.1-203	None
12	10320274	exon;three_prime_UTR;exon;three_prime_UTR	10314673;10314794;10314673;10314794	10329600;10329600;10329608;10329608	+;+;+;+	KLRD1;KLRD1;KLRD1;KLRD1	ENSG00000134539.17;ENSG00000134539.17;ENSG00000134539.17;ENSG00000134539.17	protein_coding;protein_coding;protein_coding;protein_coding	2;2;2;2	7;7;6;6	KLRD1-204;KLRD1-204;KLRD1-201;KLRD1-201	1;1;1;1
12	103557878	exon	103557412	103559815	+	LINC02401	ENSG00000257762.6	lncRNA	2	5	LINC02401-201	1
12	103558005	exon	103557412	103559815	+	LINC02401	ENSG00000257762.6	lncRNA	2	5	LINC02401-201	1
12	10396533	exon	10396179	10398506	+	AC022075.1	ENSG00000245648.2	lncRNA	2	4	AC022075.1-201	2
12	103989366	exon;three_prime_UTR;exon;three_prime_UTR;exon;three_prime_UTR	103989280;103989280;103988984;103988984;103988989;103988989	103989577;103989407;103989577;103989407;103989577;103989407	-;-;-;-;-;-	GLT8D2;GLT8D2;GLT8D2;GLT8D2;GLT8D2;GLT8D2	ENSG00000120820.12;ENSG00000120820.12;ENSG00000120820.12;ENSG00000120820.12;ENSG00000120820.12;ENSG00000120820.12	protein_coding;protein_coding;protein_coding;protein_coding;protein_coding;protein_coding	2;2;2;2;2;2	11;11;11;11;10;10	GLT8D2-205;GLT8D2-205;GLT8D2-201;GLT8D2-201;GLT8D2-202;GLT8D2-202	2;2;1;1;5;5
12	10415688	exon;CDS	10415584;10415608	10415794;10415794	-;-	KLRC3;KLRC3	ENSG00000205810.9;ENSG00000205810.9	protein_coding;protein_coding	2;2	6;6	KLRC3-201;KLRC3-201	1;1
12	104803365	exon;three_prime_UTR	104802553;104802553	104805337;104805151	-;-	SLC41A2;SLC41A2	ENSG00000136052.9;ENSG00000136052.9	protein_coding;protein_coding	2;2	10;10	SLC41A2-201;SLC41A2-201	1;1
12	105006512	exon;three_prime_UTR	104994478;104994697	105017625;105017625	+;+	C12orf45;C12orf45	ENSG00000151131.11;ENSG00000151131.11	protein_coding;protein_coding	2;2	4;4	C12orf45-204;C12orf45-204	1;1
12	105007042	exon;three_prime_UTR	104994478;104994697	105017625;105017625	+;+	C12orf45;C12orf45	ENSG00000151131.11;ENSG00000151131.11	protein_coding;protein_coding	2;2	4;4	C12orf45-204;C12orf45-204	1;1
12	106237912	exon;three_prime_UTR	106237881;106237881	106240349;106239023	-;-	CKAP4;CKAP4	ENSG00000136026.14;ENSG00000136026.14	protein_coding;protein_coding	2;2	2;2	CKAP4-201;CKAP4-201	1;1
12	106238013	exon;three_prime_UTR	106237881;106237881	106240349;106239023	-;-	CKAP4;CKAP4	ENSG00000136026.14;ENSG00000136026.14	protein_coding;protein_coding	2;2	2;2	CKAP4-201;CKAP4-201	1;1
12	106682860	exon	106681991	106683494	-	AC079385.2	ENSG00000257711.2	lncRNA	2	1	AC079385.2-203	None
12	106715571	exon	106714924	106715572	-	AC079385.3	ENSG00000257918.1	lncRNA	2	2	AC079385.3-201	3
12	106843862	exon;CDS;exon;CDS;exon;CDS	106843852;106843852;106843852;106843852;106843852;106843852	106843947;106843947;106843947;106843947;106843947;106843947	+;+;+;+;+;+	RIC8B;RIC8B;RIC8B;RIC8B;RIC8B;RIC8B	ENSG00000111785.21;ENSG00000111785.21;ENSG00000111785.21;ENSG00000111785.21;ENSG00000111785.21;ENSG00000111785.21	protein_coding;protein_coding;protein_coding;protein_coding;protein_coding;protein_coding	1;1;2;2;1;1	6;6;7;7;6;6	RIC8B-203;RIC8B-203;RIC8B-201;RIC8B-201;RIC8B-202;RIC8B-202	1;1;1;1;5;5
12	108538519	exon	108537516	108539738	+	AC008119.1	ENSG00000287202.1	lncRNA	2	2	AC008119.1-201	None
12	108539231	exon	108537516	108539738	+	AC008119.1	ENSG00000287202.1	lncRNA	2	2	AC008119.1-201	None
12	108545165	exon;CDS;exon;CDS;exon;CDS	108545139;108545139;108545139;108545139;108545139;108545139	108545323;108545323;108545323;108545323;108545323;108545323	-;-;-;-;-;-	SART3;SART3;SART3;SART3;SART3;SART3	ENSG00000075856.12;ENSG00000075856.12;ENSG00000075856.12;ENSG00000075856.12;ENSG00000075856.12;ENSG00000075856.12	protein_coding;protein_coding;protein_coding;protein_coding;protein_coding;protein_coding	1;1;2;2;2;2	4;4;4;4;4;4	SART3-206;SART3-206;SART3-201;SART3-201;SART3-202;SART3-202	5;5;1;1;1;1
12	108647390	exon;three_prime_UTR;exon;three_prime_UTR;exon;three_prime_UTR;exon;three_prime_UTR	108645109;108645109;108645115;108645115;108646567;108646567;108647380;108647380	108647522;108647402;108647522;108647402;108647522;108647402;108647522;108647402	-;-;-;-;-;-;-;-	CORO1C;CORO1C;CORO1C;CORO1C;CORO1C;CORO1C;CORO1C;CORO1C	ENSG00000110880.11;ENSG00000110880.11;ENSG00000110880.11;ENSG00000110880.11;ENSG00000110880.11;ENSG00000110880.11;ENSG00000110880.11;ENSG00000110880.11	protein_coding;protein_coding;protein_coding;protein_coding;protein_coding;protein_coding;protein_coding;protein_coding	2;2;3;3;2;2;2;2	11;11;11;11;11;11;10;10	CORO1C-201;CORO1C-201;CORO1C-202;CORO1C-202;CORO1C-204;CORO1C-204;CORO1C-203;CORO1C-203	1;1;1;1;2;2;2;2
12	108787527	exon;three_prime_UTR	108778191;108778191	108789244;108787987	-;-	SSH1;SSH1	ENSG00000084112.15;ENSG00000084112.15	protein_coding;protein_coding	2;2	15;15	SSH1-202;SSH1-202	1;1
12	10908561	exon;CDS	10907926;10908387	10909562;10909298	-;-	TAS2R13;TAS2R13	ENSG00000212128.2;ENSG00000212128.2	protein_coding;protein_coding	2;2	1;1	TAS2R13-201;TAS2R13-201	NA;NA
12	109176193	exon;CDS;exon;five_prime_UTR;exon;CDS	109176153;109176153;109176153;109176153;109176153;109176153	109176263;109176263;109176263;109176263;109176263;109176263	+;+;+;+;+;+	ACACB;ACACB;ACACB;ACACB;ACACB;ACACB	ENSG00000076555.15;ENSG00000076555.15;ENSG00000076555.15;ENSG00000076555.15;ENSG00000076555.15;ENSG00000076555.15	protein_coding;protein_coding;protein_coding;protein_coding;protein_coding;protein_coding	2;2;3;3;3;3	9;9;8;8;8;8	ACACB-201;ACACB-201;ACACB-203;ACACB-203;ACACB-202;ACACB-202	1;1;5;5;1;1
12	109449845	exon;three_prime_UTR	109448655;109448655	109451813;109451594	-;-	KCTD10;KCTD10	ENSG00000110906.13;ENSG00000110906.13	protein_coding;protein_coding	2;2	7;7	KCTD10-201;KCTD10-201	1;1
12	109491245	exon;three_prime_UTR	109489919;109490119	109492737;109492737	+;+	UBE3B;UBE3B	ENSG00000151148.14;ENSG00000151148.14	protein_coding;protein_coding	2;2	8;8	UBE3B-207;UBE3B-207	3;3
12	109492366	exon;three_prime_UTR	109489919;109490119	109492737;109492737	+;+	UBE3B;UBE3B	ENSG00000151148.14;ENSG00000151148.14	protein_coding;protein_coding	2;2	8;8	UBE3B-207;UBE3B-207	3;3
12	109852391	exon;three_prime_UTR;exon;three_prime_UTR	109850945;109850945;109852261;109852261	109852737;109852554;109852737;109852554	-;-;-;-	GLTP;GLTP;GLTP;GLTP	ENSG00000139433.11;ENSG00000139433.11;ENSG00000139433.11;ENSG00000139433.11	protein_coding;protein_coding;protein_coding;protein_coding	2;2;2;2	5;5;5;5	GLTP-201;GLTP-201;GLTP-205;GLTP-205	1;1;3;3
12	110168477	exon;three_prime_UTR	110167871;110167979	110169182;110169182	+;+	IFT81;IFT81	ENSG00000122970.16;ENSG00000122970.16	protein_coding;protein_coding	2;2	12;12	IFT81-202;IFT81-202	1;1
12	110435017	exon;three_prime_UTR	110434823;110434823	110435217;110435154	-;-	ARPC3;ARPC3	ENSG00000111229.16;ENSG00000111229.16	protein_coding;protein_coding	2;2	7;7	ARPC3-201;ARPC3-201	1;1
12	110536539	exon;three_prime_UTR	110533245;110533245	110537095;110537036	-;-	PPTC7;PPTC7	ENSG00000196850.6;ENSG00000196850.6	protein_coding;protein_coding	2;2	6;6	PPTC7-201;PPTC7-201	1;1
12	110732560	exon;five_prime_UTR	110731770;110731984	110732983;110732983	-;-	PPP1CC;PPP1CC	ENSG00000186298.12;ENSG00000186298.12	protein_coding;protein_coding	2;2	1;1	PPP1CC-204;PPP1CC-204	3;3
12	111642836	exon;three_prime_UTR	111642146;111642146	111644562;111644198	-;-	BRAP;BRAP	ENSG00000089234.16;ENSG00000089234.16	protein_coding;protein_coding	2;2	12;12	BRAP-202;BRAP-202	1;1
12	111931544	exon;three_prime_UTR;exon;three_prime_UTR;exon;three_prime_UTR;exon;three_prime_UTR	111931282;111931282;111931298;111931298;111931298;111931298;111931370;111931370	111931827;111931620;111931827;111931620;111931827;111931620;111931827;111931620	-;-;-;-;-;-;-;-	TMEM116;TMEM116;TMEM116;TMEM116;TMEM116;TMEM116;TMEM116;TMEM116	ENSG00000198270.13;ENSG00000198270.13;ENSG00000198270.13;ENSG00000198270.13;ENSG00000198270.13;ENSG00000198270.13;ENSG00000198270.13;ENSG00000198270.13	protein_coding;protein_coding;protein_coding;protein_coding;protein_coding;protein_coding;protein_coding;protein_coding	2;2;2;2;2;2;1;1	10;10;10;10;11;11;9;9	TMEM116-213;TMEM116-213;TMEM116-201;TMEM116-201;TMEM116-215;TMEM116-215;TMEM116-208;TMEM116-208	1;1;1;1;1;1;2;2
12	112258960	exon	112258395	112259091	+	AC004217.1	ENSG00000257494.1	lncRNA	2	2	AC004217.1-201	3
12	112906937	exon;five_prime_UTR;exon;five_prime_UTR;exon;five_prime_UTR	112906783;112906783;112906850;112906850;112906929;112906929	112907219;112907039;112907219;112907039;112907219;112907039	+;+;+;+;+;+	OAS1;OAS1;OAS1;OAS1;OAS1;OAS1	ENSG00000089127.14;ENSG00000089127.14;ENSG00000089127.14;ENSG00000089127.14;ENSG00000089127.14;ENSG00000089127.14	protein_coding;protein_coding;protein_coding;protein_coding;protein_coding;protein_coding	2;2;2;2;2;2	1;1;1;1;1;1	OAS1-202;OAS1-202;OAS1-203;OAS1-203;OAS1-212;OAS1-212	1;1;1;1;None;None
12	114113473	exon	114113341	114113489	+	AC010183.2	ENSG00000257997.5	lncRNA	2	4	AC010183.2-202	3
12	11481496	exon	11481383	11481656	+	HIGD1AP8	ENSG00000237303.2	processed_pseudogene	1	1	HIGD1AP8-201	NA
12	116358846	exon	116358796	116359096	-	AC079384.2	ENSG00000286354.1	lncRNA	2	1	AC079384.2-201	None
12	116358862	exon	116358796	116359096	-	AC079384.2	ENSG00000286354.1	lncRNA	2	1	AC079384.2-201	None
12	116858135	exon;three_prime_UTR	116856144;116856144	116861466;116861466	-;-	HRK;HRK	ENSG00000135116.9;ENSG00000135116.9	protein_coding;protein_coding	2;2	2;2	HRK-201;HRK-201	1;1
12	117143948	exon;three_prime_UTR;exon;three_prime_UTR	117141991;117141991;117143781;117143781	117146277;117146086;117146277;117146086	-;-;-;-	FBXO21;FBXO21;FBXO21;FBXO21	ENSG00000135108.15;ENSG00000135108.15;ENSG00000135108.15;ENSG00000135108.15	protein_coding;protein_coding;protein_coding;protein_coding	2;2;3;3	12;12;13;13	FBXO21-208;FBXO21-208;FBXO21-202;FBXO21-202	1;1;1;1
12	117214833	exon;three_prime_UTR;exon;three_prime_UTR	117208142;117208142;117208144;117208144	117215324;117215308;117215324;117215308	-;-;-;-	NOS1;NOS1;NOS1;NOS1	ENSG00000089250.19;ENSG00000089250.19;ENSG00000089250.19;ENSG00000089250.19	protein_coding;protein_coding;protein_coding;protein_coding	2;2;3;3	29;29;30;30	NOS1-201;NOS1-201;NOS1-206;NOS1-206	1;1;5;5
12	117456903	exon;three_prime_UTR;exon;three_prime_UTR	117453012;117453012;117453012;117453012	117467205;117467198;117467205;117467198	-;-;-;-	KSR2;KSR2;KSR2;KSR2	ENSG00000171435.14;ENSG00000171435.14;ENSG00000171435.14;ENSG00000171435.14	protein_coding;protein_coding;protein_coding;protein_coding	3;3;2;2	20;20;20;20	KSR2-202;KSR2-202;KSR2-201;KSR2-201	5;5;5;5
12	118032093	exon;three_prime_UTR;exon;three_prime_UTR	118031182;118031279;118031182;118031279	118032234;118032234;118032234;118032234	+;+;+;+	RFC5;RFC5;RFC5;RFC5	ENSG00000111445.14;ENSG00000111445.14;ENSG00000111445.14;ENSG00000111445.14	protein_coding;protein_coding;protein_coding;protein_coding	2;2;2;2	11;11;12;12	RFC5-204;RFC5-204;RFC5-201;RFC5-201	1;1;2;2
12	119640873	exon;three_prime_UTR	119640699;119640706	119643075;119643075	+;+	TMEM233;TMEM233	ENSG00000224982.4;ENSG00000224982.4	protein_coding;protein_coding	2;2	3;3	TMEM233-201;TMEM233-201	2;2
12	120099032	exon;CDS;exon;CDS	120099030;120099030;120099030;120099030	120099154;120099154;120099154;120099154	-;-;-;-	RAB35;RAB35;RAB35;RAB35	ENSG00000111737.12;ENSG00000111737.12;ENSG00000111737.12;ENSG00000111737.12	protein_coding;protein_coding;protein_coding;protein_coding	2;2;2;2	4;4;4;4	RAB35-201;RAB35-201;RAB35-202;RAB35-202	1;1;2;2
12	12118129	exon;three_prime_UTR	12116025;12116025	12121420;12121125	-;-	LRP6;LRP6	ENSG00000070018.9;ENSG00000070018.9	protein_coding;protein_coding	2;2	23;23	LRP6-201;LRP6-201	1;1
12	121240537	exon;three_prime_UTR;exon;CDS;exon;three_prime_UTR;exon;three_prime_UTR;exon;three_prime_UTR;exon;three_prime_UTR;exon;three_prime_UTR;exon;CDS;exon;three_prime_UTR	121237675;121237675;121237691;121240468;121237692;121237692;121237697;121237697;121237697;121237697;121237697;121237697;121237697;121237697;121237770;121240468;121240525;121240525	121240869;121240698;121240542;121240542;121240869;121240698;121240869;121240698;121240869;121240796;121240869;121240796;121240869;121240698;121240542;121240542;121240869;121240796	-;-;-;-;-;-;-;-;-;-;-;-;-;-;-;-;-;-	CAMKK2;CAMKK2;CAMKK2;CAMKK2;CAMKK2;CAMKK2;CAMKK2;CAMKK2;CAMKK2;CAMKK2;CAMKK2;CAMKK2;CAMKK2;CAMKK2;CAMKK2;CAMKK2;CAMKK2;CAMKK2	ENSG00000110931.19;ENSG00000110931.19;ENSG00000110931.19;ENSG00000110931.19;ENSG00000110931.19;ENSG00000110931.19;ENSG00000110931.19;ENSG00000110931.19;ENSG00000110931.19;ENSG00000110931.19;ENSG00000110931.19;ENSG00000110931.19;ENSG00000110931.19;ENSG00000110931.19;ENSG00000110931.19;ENSG00000110931.19;ENSG00000110931.19;ENSG00000110931.19	protein_coding;protein_coding;protein_coding;protein_coding;protein_coding;protein_coding;protein_coding;protein_coding;protein_coding;protein_coding;protein_coding;protein_coding;protein_coding;protein_coding;protein_coding;protein_coding;protein_coding;protein_coding	2;2;2;2;2;2;2;2;2;2;2;2;2;2;2;2;2;2	19;19;16;16;17;17;16;16;15;15;16;16;17;17;11;11;16;16	CAMKK2-217;CAMKK2-217;CAMKK2-205;CAMKK2-205;CAMKK2-207;CAMKK2-207;CAMKK2-203;CAMKK2-203;CAMKK2-211;CAMKK2-211;CAMKK2-202;CAMKK2-202;CAMKK2-201;CAMKK2-201;CAMKK2-216;CAMKK2-216;CAMKK2-208;CAMKK2-208	None;None;1;1;1;1;1;1;1;1;1;1;1;1;1;1;1;1
12	121921491	exon;CDS;exon;CDS	121921286;121921306;121921286;121921306	121921683;121921683;121921683;121921683	+;+;+;+	CFAP251;CFAP251;CFAP251;CFAP251	ENSG00000158023.10;ENSG00000158023.10;ENSG00000158023.10;ENSG00000158023.10	protein_coding;protein_coding;protein_coding;protein_coding	1;1;2;2	2;2;2;2	CFAP251-202;CFAP251-202;CFAP251-201;CFAP251-201	1;1;1;1
12	122263597	exon;CDS;exon;CDS;exon;CDS;exon;CDS	122263572;122263572;122263572;122263572;122263572;122263572;122263572;122263572	122263699;122263699;122263699;122263699;122263699;122263699;122263699;122263699	-;-;-;-;-;-;-;-	AC048338.1;AC048338.1;VPS33A;VPS33A;VPS33A;VPS33A;VPS33A;VPS33A	ENSG00000256861.1;ENSG00000256861.1;ENSG00000139719.11;ENSG00000139719.11;ENSG00000139719.11;ENSG00000139719.11;ENSG00000139719.11;ENSG00000139719.11	protein_coding;protein_coding;protein_coding;protein_coding;protein_coding;protein_coding;protein_coding;protein_coding	2;2;2;2;2;2;1;1	3;3;3;3;3;3;3;3	AC048338.1-201;AC048338.1-201;VPS33A-201;VPS33A-201;VPS33A-209;VPS33A-209;VPS33A-202;VPS33A-202	2;2;1;1;None;None;3;3
12	122504161	exon;three_prime_UTR	122503454;122503454	122505706;122505526	-;-	RSRC2;RSRC2	ENSG00000111011.18;ENSG00000111011.18	protein_coding;protein_coding	2;2	10;10	RSRC2-201;RSRC2-201	1;1
12	122872688	exon	122870059	122888720	-	AC027290.2	ENSG00000280138.1	TEC	2	1	AC027290.2-201	NA
12	122875845	exon	122870059	122888720	-	AC027290.2	ENSG00000280138.1	TEC	2	1	AC027290.2-201	NA
12	122877897	exon	122870059	122888720	-	AC027290.2	ENSG00000280138.1	TEC	2	1	AC027290.2-201	NA
12	122881807	exon	122870059	122888720	-	AC027290.2	ENSG00000280138.1	TEC	2	1	AC027290.2-201	NA
12	122929679	exon;three_prime_UTR;exon;three_prime_UTR;exon;three_prime_UTR;exon;three_prime_UTR;exon;three_prime_UTR;exon;three_prime_UTR	122928992;122928992;122928994;122928994;122928994;122928994;122928999;122928999;122929000;122929000;122929000;122929000	122930171;122929910;122930171;122929910;122930171;122929910;122930171;122929910;122930180;122929910;122930171;122929910	-;-;-;-;-;-;-;-;-;-;-;-	ABCB9;ABCB9;ABCB9;ABCB9;ABCB9;ABCB9;ABCB9;ABCB9;ABCB9;ABCB9;ABCB9;ABCB9	ENSG00000150967.18;ENSG00000150967.18;ENSG00000150967.18;ENSG00000150967.18;ENSG00000150967.18;ENSG00000150967.18;ENSG00000150967.18;ENSG00000150967.18;ENSG00000150967.18;ENSG00000150967.18;ENSG00000150967.18;ENSG00000150967.18	protein_coding;protein_coding;protein_coding;protein_coding;protein_coding;protein_coding;protein_coding;protein_coding;protein_coding;protein_coding;protein_coding;protein_coding	2;2;2;2;3;3;2;2;3;3;2;2	12;12;11;11;11;11;12;12;12;12;12;12	ABCB9-201;ABCB9-201;ABCB9-211;ABCB9-211;ABCB9-203;ABCB9-203;ABCB9-204;ABCB9-204;ABCB9-206;ABCB9-206;ABCB9-216;ABCB9-216	1;1;2;2;5;5;5;5;1;1;1;1
12	123156664	exon;three_prime_UTR;exon;three_prime_UTR	123154215;123154215;123154215;123154215	123156908;123156806;123156908;123156806	-;-;-;-	MPHOSPH9;MPHOSPH9;MPHOSPH9;MPHOSPH9	ENSG00000051825.15;ENSG00000051825.15;ENSG00000051825.15;ENSG00000051825.15	protein_coding;protein_coding;protein_coding;protein_coding	2;2;2;2	22;22;24;24	MPHOSPH9-211;MPHOSPH9-211;MPHOSPH9-220;MPHOSPH9-220	5;5;5;5
12	123289453	exon;three_prime_UTR;exon;three_prime_UTR;exon;three_prime_UTR	123289109;123289109;123289109;123289109;123289109;123289109	123296050;123295907;123296050;123295907;123296050;123295907	-;-;-;-;-;-	SBNO1;SBNO1;SBNO1;SBNO1;SBNO1;SBNO1	ENSG00000139697.14;ENSG00000139697.14;ENSG00000139697.14;ENSG00000139697.14;ENSG00000139697.14;ENSG00000139697.14	protein_coding;protein_coding;protein_coding;protein_coding;protein_coding;protein_coding	3;3;2;2;2;2	31;31;32;32;32;32	SBNO1-202;SBNO1-202;SBNO1-201;SBNO1-201;SBNO1-203;SBNO1-203	1;1;5;5;5;5
12	123413597	exon;three_prime_UTR	123410683;123410683	123415921;123415890	-;-	RILPL2;RILPL2	ENSG00000150977.10;ENSG00000150977.10	protein_coding;protein_coding	2;2	4;4	RILPL2-201;RILPL2-201	1;1
12	123581928	exon	123575891	123583167	-	TMED2-DT	ENSG00000247373.3	lncRNA	2	3	TMED2-DT-201	2
12	123581935	exon	123575891	123583167	-	TMED2-DT	ENSG00000247373.3	lncRNA	2	3	TMED2-DT-201	2
12	124015427	exon;three_prime_UTR;exon;three_prime_UTR	124011546;124012931;124011546;124012931	124015427;124015427;124015439;124015439	+;+;+;+	ZNF664;ZNF664;ZNF664;ZNF664	ENSG00000179195.16;ENSG00000179195.16;ENSG00000179195.16;ENSG00000179195.16	protein_coding;protein_coding;protein_coding;protein_coding	2;2;2;2	5;5;5;5	ZNF664-201;ZNF664-201;ZNF664-204;ZNF664-204	1;1;3;3
12	124911639	exon;three_prime_UTR	124911604;124911604	124915348;124911713	-;-	UBC;UBC	ENSG00000150991.15;ENSG00000150991.15	protein_coding;protein_coding	2;2	1;1	UBC-205;UBC-205	NA;NA
12	124911639	exon;three_prime_UTR	124911604;124911604	124915348;124911713	-;-	UBC;UBC	ENSG00000150991.15;ENSG00000150991.15	protein_coding;protein_coding	2;2	1;1	UBC-205;UBC-205	NA;NA
12	125030053	exon;three_prime_UTR;exon;three_prime_UTR	125024991;125025431;125024991;125025524	125031231;125031231;125031231;125031231	+;+;+;+	BRI3BP;BRI3BP;BRI3BP;BRI3BP	ENSG00000184992.13;ENSG00000184992.13;ENSG00000184992.13;ENSG00000184992.13	protein_coding;protein_coding;protein_coding;protein_coding	2;2;2;2	3;3;3;3	BRI3BP-201;BRI3BP-201;BRI3BP-202;BRI3BP-202	1;1;None;None
12	125030299	exon;three_prime_UTR;exon;three_prime_UTR	125024991;125025431;125024991;125025524	125031231;125031231;125031231;125031231	+;+;+;+	BRI3BP;BRI3BP;BRI3BP;BRI3BP	ENSG00000184992.13;ENSG00000184992.13;ENSG00000184992.13;ENSG00000184992.13	protein_coding;protein_coding;protein_coding;protein_coding	2;2;2;2	3;3;3;3	BRI3BP-201;BRI3BP-201;BRI3BP-202;BRI3BP-202	1;1;None;None
12	126027311	exon	126027206	126027717	+	LINC02826	ENSG00000275212.3	lncRNA	2	3	LINC02826-204	None
12	126469325	exon	126468758	126470417	+	LINC02347	ENSG00000214043.8	lncRNA	2	3	LINC02347-207	None
12	126665465	exon	126665445	126665564	-	AC006065.4	ENSG00000256732.1	lncRNA	2	2	AC006065.4-203	2
12	126915236	exon;exon	126915199;126915203	126915449;126915449	-;-	LINC02405;LINC02405	ENSG00000249345.8;ENSG00000249345.8	lncRNA;lncRNA	2;2	8;7	LINC02405-204;LINC02405-201	None;1
12	127206828	exon	127206714	127207706	+	AC079949.3	ENSG00000286016.1	lncRNA	2	5	AC079949.3-201	None
12	12722292	exon;three_prime_UTR	12721036;12721036	12722369;12722369	+;+	CDKN1B;CDKN1B	ENSG00000111276.11;ENSG00000111276.11	protein_coding;protein_coding	2;2	3;3	CDKN1B-201;CDKN1B-201	1;1
12	128814329	exon	128813186	128814750	-	AC108704.2	ENSG00000279500.1	TEC	2	1	AC108704.2-201	NA
12	129014747	exon	129014145	129016663	+	NLRP9P1	ENSG00000256581.1	unprocessed_pseudogene	1	2	NLRP9P1-201	NA
12	13039639	exon	13039450	13040679	+	AC023790.2	ENSG00000255621.1	lncRNA	2	5	AC023790.2-201	5
12	13083875	exon;three_prime_UTR;exon;three_prime_UTR	13083532;13083532;13083560;13083560	13085243;13084900;13085243;13084900	-;-;-;-	GSG1;GSG1;GSG1;GSG1	ENSG00000111305.19;ENSG00000111305.19;ENSG00000111305.19;ENSG00000111305.19	protein_coding;protein_coding;protein_coding;protein_coding	2;2;2;2	7;7;6;6	GSG1-210;GSG1-210;GSG1-201;GSG1-201	None;None;1;1
12	131292144	exon	131292068	131293176	-	RPS6P20	ENSG00000226356.2	unprocessed_pseudogene	1	1	RPS6P20-201	NA
12	131292160	exon	131292068	131293176	-	RPS6P20	ENSG00000226356.2	unprocessed_pseudogene	1	1	RPS6P20-201	NA
12	131370869	exon	131370616	131371059	+	AC140118.1	ENSG00000256484.1	lncRNA	2	2	AC140118.1-201	4
12	131849917	exon;CDS;exon;CDS	131849802;131849802;131849802;131849802	131850059;131850059;131850059;131850059	+;+;+;+	MMP17;MMP17;MMP17;MMP17	ENSG00000198598.6;ENSG00000198598.6;ENSG00000198598.6;ENSG00000198598.6	protein_coding;protein_coding;protein_coding;protein_coding	2;2;2;2	9;9;8;8	MMP17-201;MMP17-201;MMP17-206;MMP17-206	1;1;1;1
12	133105857	exon;CDS;exon;CDS;exon;three_prime_UTR	133105510;133105510;133105510;133105587;133105625;133105699	133107544;133106651;133107526;133106651;133106866;133106866	+;+;+;+;+;+	ZNF140;ZNF140;ZNF140;ZNF140;ZNF140;ZNF140	ENSG00000196387.9;ENSG00000196387.9;ENSG00000196387.9;ENSG00000196387.9;ENSG00000196387.9;ENSG00000196387.9	protein_coding;protein_coding;protein_coding;protein_coding;protein_coding;protein_coding	2;2;2;2;1;1	5;5;4;4;5;5	ZNF140-202;ZNF140-202;ZNF140-210;ZNF140-210;ZNF140-207;ZNF140-207	1;1;2;2;2;2
12	133113424	exon;three_prime_UTR	133106817;133106817	133122024;133120283	-;-	ZNF891;ZNF891	ENSG00000214029.5;ENSG00000214029.5	protein_coding;protein_coding	2;2	2;2	ZNF891-201;ZNF891-201	2;2
12	133203030	exon;CDS;exon;CDS;exon;three_prime_UTR;exon;three_prime_UTR;exon;three_prime_UTR	133202144;133202144;133202144;133202144;133202144;133202318;133202144;133202163;133202144;133202163	133205023;133204530;133214832;133204530;133205121;133205121;133205173;133205173;133205173;133205173	+;+;+;+;+;+;+;+;+;+	ZNF268;ZNF268;ZNF268;ZNF268;ZNF268;ZNF268;ZNF268;ZNF268;ZNF268;ZNF268	ENSG00000090612.22;ENSG00000090612.22;ENSG00000090612.22;ENSG00000090612.22;ENSG00000090612.22;ENSG00000090612.22;ENSG00000090612.22;ENSG00000090612.22;ENSG00000090612.22;ENSG00000090612.22	protein_coding;protein_coding;protein_coding;protein_coding;protein_coding;protein_coding;protein_coding;protein_coding;protein_coding;protein_coding	2;2;2;2;2;2;2;2;2;2	6;6;6;6;3;3;7;7;7;7	ZNF268-201;ZNF268-201;ZNF268-205;ZNF268-205;ZNF268-206;ZNF268-206;ZNF268-213;ZNF268-213;ZNF268-209;ZNF268-209	1;1;1;1;1;1;5;5;1;1
12	133204049	exon;CDS;exon;CDS;exon;three_prime_UTR;exon;three_prime_UTR;exon;three_prime_UTR	133202144;133202144;133202144;133202144;133202144;133202318;133202144;133202163;133202144;133202163	133205023;133204530;133214832;133204530;133205121;133205121;133205173;133205173;133205173;133205173	+;+;+;+;+;+;+;+;+;+	ZNF268;ZNF268;ZNF268;ZNF268;ZNF268;ZNF268;ZNF268;ZNF268;ZNF268;ZNF268	ENSG00000090612.22;ENSG00000090612.22;ENSG00000090612.22;ENSG00000090612.22;ENSG00000090612.22;ENSG00000090612.22;ENSG00000090612.22;ENSG00000090612.22;ENSG00000090612.22;ENSG00000090612.22	protein_coding;protein_coding;protein_coding;protein_coding;protein_coding;protein_coding;protein_coding;protein_coding;protein_coding;protein_coding	2;2;2;2;2;2;2;2;2;2	6;6;6;6;3;3;7;7;7;7	ZNF268-201;ZNF268-201;ZNF268-205;ZNF268-205;ZNF268-206;ZNF268-206;ZNF268-213;ZNF268-213;ZNF268-209;ZNF268-209	1;1;1;1;1;1;5;5;1;1
12	13547576	exon;exon;three_prime_UTR	13547320;13537337;13537337	13547582;13564639;13562782	+;-;-	AC007527.1;GRIN2B;GRIN2B	ENSG00000256306.1;ENSG00000273079.6;ENSG00000273079.6	lncRNA;protein_coding;protein_coding	2;2;2	2;14;14	AC007527.1-202;GRIN2B-201;GRIN2B-201	3;1;1
12	14765039	exon	14762504	14767931	-	AC010168.2	ENSG00000261324.2	lncRNA	2	1	AC010168.2-201	NA
12	14823667	exon;CDS	14822912;14822936	14824415;14823673	+;+	C12orf60;C12orf60	ENSG00000182993.5;ENSG00000182993.5	protein_coding;protein_coding	2;2	2;2	C12orf60-201;C12orf60-201	1;1
12	14827069	exon;three_prime_UTR	14825569;14825569	14829462;14829370	-;-	ART4;ART4	ENSG00000111339.12;ENSG00000111339.12	protein_coding;protein_coding	2;2	3;3	ART4-201;ART4-201	1;1
12	148958	exon	147758	149115	-	AC026369.1	ENSG00000249695.6	lncRNA	2	1	AC026369.1-202	1
12	15602082	exon;three_prime_UTR	15596090;15596090	15602175;15602175	+;+	PTPRO;PTPRO	ENSG00000151490.15;ENSG00000151490.15	protein_coding;protein_coding	2;2	15;15	PTPRO-222;PTPRO-222	None;None
12	15662508	exon;five_prime_UTR	15662336;15662336	15662692;15662692	-;-	EPS8;EPS8	ENSG00000151491.14;ENSG00000151491.14	protein_coding;protein_coding	1;1	1;1	EPS8-207;EPS8-207	2;2
12	16347867	exon;five_prime_UTR;exon;five_prime_UTR	16347778;16347778;16347778;16347778	16347898;16347898;16347898;16347898	+;+;+;+	MGST1;MGST1;MGST1;MGST1	ENSG00000008394.13;ENSG00000008394.13;ENSG00000008394.13;ENSG00000008394.13	protein_coding;protein_coding;protein_coding;protein_coding	2;2;3;3	1;1;1;1	MGST1-215;MGST1-215;MGST1-204;MGST1-204	3;3;2;2
12	17074441	exon;exon	17074290;17074290	17075631;17074649	+;+	AC092793.1;AC092793.1	ENSG00000287455.1;ENSG00000287455.1	lncRNA;lncRNA	2;2	3;4	AC092793.1-201;AC092793.1-202	None;None
12	1745905	exon	1744623	1745940	-	AC005343.1	ENSG00000285627.1	lncRNA	2	2	AC005343.1-201	None
12	17696148	exon;exon	17695508;17695508	17696655;17696675	+;+	AC048352.1;AC048352.1	ENSG00000256389.2;ENSG00000256389.2	lncRNA;lncRNA	2;2	3;2	AC048352.1-206;AC048352.1-207	None;None
12	19372411	exon;three_prime_UTR	19370722;19370722	19373668;19373668	+;+	PLEKHA5;PLEKHA5	ENSG00000052126.14;ENSG00000052126.14	protein_coding;protein_coding	2;2	28;28	PLEKHA5-213;PLEKHA5-213	1;1
12	19518238	exon;three_prime_UTR	19518087;19518118	19522227;19522227	+;+	AEBP2;AEBP2	ENSG00000139154.16;ENSG00000139154.16	protein_coding;protein_coding	2;2	8;8	AEBP2-201;AEBP2-201	1;1
12	21379159	exon;three_prime_UTR;exon;three_prime_UTR	21378237;21378427;21378237;21378305	21379980;21379980;21379978;21379978	+;+;+;+	IAPP;IAPP;IAPP;IAPP	ENSG00000121351.8;ENSG00000121351.8;ENSG00000121351.8;ENSG00000121351.8	protein_coding;protein_coding;protein_coding;protein_coding	2;2;1;1	3;3;4;4	IAPP-201;IAPP-201;IAPP-205;IAPP-205	1;1;2;2
12	21516241	exon;three_prime_UTR	21515669;21515708	21518408;21518408	+;+	GOLT1B;GOLT1B	ENSG00000111711.10;ENSG00000111711.10	protein_coding;protein_coding	2;2	5;5	GOLT1B-201;GOLT1B-201	1;1
12	21516315	exon;three_prime_UTR	21515669;21515708	21518408;21518408	+;+	GOLT1B;GOLT1B	ENSG00000111711.10;ENSG00000111711.10	protein_coding;protein_coding	2;2	5;5	GOLT1B-201;GOLT1B-201	1;1
12	22126671	exon	22126629	22126755	-	SULT6B2P	ENSG00000283582.1	unitary_pseudogene	2	3	SULT6B2P-201	NA
12	22199799	exon;three_prime_UTR	22193391;22193391	22202038;22201551	-;-	ST8SIA1;ST8SIA1	ENSG00000111728.10;ENSG00000111728.10	protein_coding;protein_coding	2;2	5;5	ST8SIA1-203;ST8SIA1-203	1;1
12	22686879	exon;three_prime_UTR	22684882;22684955	22690665;22690665	+;+	ETNK1;ETNK1	ENSG00000139163.16;ENSG00000139163.16	protein_coding;protein_coding	2;2	8;8	ETNK1-201;ETNK1-201	1;1
12	23531537	exon;three_prime_UTR	23529504;23529504	23534522;23534218	-;-	SOX5;SOX5	ENSG00000134532.19;ENSG00000134532.19	protein_coding;protein_coding	2;2	15;15	SOX5-207;SOX5-207	1;1
12	25207910	exon;three_prime_UTR;exon;three_prime_UTR	25205246;25205246;25205246;25205246	25209911;25209911;25209911;25209794	-;-;-;-	KRAS;KRAS;KRAS;KRAS	ENSG00000133703.13;ENSG00000133703.13;ENSG00000133703.13;ENSG00000133703.13	protein_coding;protein_coding;protein_coding;protein_coding	2;2;2;2	6;6;5;5	KRAS-201;KRAS-201;KRAS-202;KRAS-202	1;1;1;1
12	25209368	exon;three_prime_UTR;exon;three_prime_UTR;exon;three_prime_UTR;exon;three_prime_UTR	25209195;25209264;25205246;25205246;25205246;25205246;25209168;25209168	25209645;25209645;25209911;25209911;25209911;25209794;25209911;25209794	+;+;-;-;-;-;-;-	ETFRF1;ETFRF1;KRAS;KRAS;KRAS;KRAS;KRAS;KRAS	ENSG00000205707.11;ENSG00000205707.11;ENSG00000133703.13;ENSG00000133703.13;ENSG00000133703.13;ENSG00000133703.13;ENSG00000133703.13;ENSG00000133703.13	protein_coding;protein_coding;protein_coding;protein_coding;protein_coding;protein_coding;protein_coding;protein_coding	1;1;2;2;2;2;2;2	4;4;6;6;5;5;3;3	ETFRF1-202;ETFRF1-202;KRAS-201;KRAS-201;KRAS-202;KRAS-202;KRAS-204;KRAS-204	3;3;1;1;1;1;5;5
12	25804195	exon	25803298	25804526	+	TDGP1	ENSG00000255725.2	processed_pseudogene	1	1	TDGP1-201	NA
12	26070711	exon;three_prime_UTR;exon;three_prime_UTR	26068697;26068819;26068697;26068819	26072869;26072869;26072871;26072871	+;+;+;+	RASSF8;RASSF8;RASSF8;RASSF8	ENSG00000123094.15;ENSG00000123094.15;ENSG00000123094.15;ENSG00000123094.15	protein_coding;protein_coding;protein_coding;protein_coding	2;2;3;3	5;5;5;5	RASSF8-203;RASSF8-203;RASSF8-210;RASSF8-210	1;1;5;5
12	26252909	exon;three_prime_UTR	26252868;26252889	26252920;26252920	+;+	SSPN;SSPN	ENSG00000123096.12;ENSG00000123096.12	protein_coding;protein_coding	2;2	3;3	SSPN-204;SSPN-204	1;1
12	26990493	exon;CDS	26990450;26990450	26990627;26990627	-;-	TM7SF3;TM7SF3	ENSG00000064115.11;ENSG00000064115.11	protein_coding;protein_coding	2;2	6;6	TM7SF3-201;TM7SF3-201	1;1
12	2799934	exon;CDS	2799850;2799850	2799940;2799940	+;+	FKBP4;FKBP4	ENSG00000004478.8;ENSG00000004478.8	protein_coding;protein_coding	2;2	6;6	FKBP4-201;FKBP4-201	1;1
12	28189824	exon	28188330	28190738	-	AC022364.1	ENSG00000247934.4	lncRNA	2	1	AC022364.1-202	NA
12	29393489	exon	29389289	29394817	+	OVCH1-AS1	ENSG00000257599.3	lncRNA	2	1	OVCH1-AS1-204	None
12	2940312	exon;three_prime_UTR	2939311;2939445	2941138;2941138	+;+	TULP3;TULP3	ENSG00000078246.17;ENSG00000078246.17	protein_coding;protein_coding	2;2	11;11	TULP3-202;TULP3-202	2;2
12	2940338	exon;three_prime_UTR	2939311;2939445	2941138;2941138	+;+	TULP3;TULP3	ENSG00000078246.17;ENSG00000078246.17	protein_coding;protein_coding	2;2	11;11	TULP3-202;TULP3-202	2;2
12	2940338	exon;three_prime_UTR	2939311;2939445	2941138;2941138	+;+	TULP3;TULP3	ENSG00000078246.17;ENSG00000078246.17	protein_coding;protein_coding	2;2	11;11	TULP3-202;TULP3-202	2;2
12	29506150	exon;three_prime_UTR;exon;three_prime_UTR;exon;three_prime_UTR;exon;three_prime_UTR	29500840;29500840;29500840;29500840;29505599;29505599;29505699;29505699	29506986;29506845;29506986;29506845;29506986;29506845;29506986;29506845	-;-;-;-;-;-;-;-	TMTC1;TMTC1;TMTC1;TMTC1;TMTC1;TMTC1;TMTC1;TMTC1	ENSG00000133687.16;ENSG00000133687.16;ENSG00000133687.16;ENSG00000133687.16;ENSG00000133687.16;ENSG00000133687.16;ENSG00000133687.16;ENSG00000133687.16	protein_coding;protein_coding;protein_coding;protein_coding;protein_coding;protein_coding;protein_coding;protein_coding	2;2;2;2;2;2;2;2	18;18;18;18;20;20;19;19	TMTC1-203;TMTC1-203;TMTC1-201;TMTC1-201;TMTC1-206;TMTC1-206;TMTC1-207;TMTC1-207	1;1;1;1;5;5;5;5
12	29768029	exon;CDS;exon;CDS;exon;CDS;exon;CDS	29767898;29767898;29767898;29767898;29767898;29767898;29767898;29767898	29768075;29768075;29768075;29768053;29768075;29768075;29768075;29768075	-;-;-;-;-;-;-;-	TMTC1;TMTC1;TMTC1;TMTC1;TMTC1;TMTC1;TMTC1;TMTC1	ENSG00000133687.16;ENSG00000133687.16;ENSG00000133687.16;ENSG00000133687.16;ENSG00000133687.16;ENSG00000133687.16;ENSG00000133687.16;ENSG00000133687.16	protein_coding;protein_coding;protein_coding;protein_coding;protein_coding;protein_coding;protein_coding;protein_coding	2;2;2;2;2;2;2;2	2;2;2;2;2;2;2;2	TMTC1-203;TMTC1-203;TMTC1-201;TMTC1-201;TMTC1-206;TMTC1-206;TMTC1-207;TMTC1-207	1;1;1;1;5;5;5;5
12	30810607	exon	30801701	30817435	+	AC010198.2	ENSG00000285517.1	lncRNA	2	5	AC010198.2-205	None
12	30811760	exon	30801701	30817435	+	AC010198.2	ENSG00000285517.1	lncRNA	2	5	AC010198.2-205	None
12	30992776	exon;three_prime_UTR;exon;three_prime_UTR	30991856;30991916;30991856;30991916	30996599;30996599;30996602;30996602	+;+;+;+	TSPAN11;TSPAN11;TSPAN11;TSPAN11	ENSG00000110900.16;ENSG00000110900.16;ENSG00000110900.16;ENSG00000110900.16	protein_coding;protein_coding;protein_coding;protein_coding	2;2;2;2	8;8;8;8	TSPAN11-204;TSPAN11-204;TSPAN11-201;TSPAN11-201	2;2;1;1
12	31115249	exon	31115203	31115703	-	AC024940.1	ENSG00000177359.20	transcribed_unprocessed_pseudogene	2	3	AC024940.1-201	5
12	31384106	exon;three_prime_UTR	31382226;31382226	31387786;31387602	-;-	DENND5B;DENND5B	ENSG00000170456.16;ENSG00000170456.16	protein_coding;protein_coding	2;2	21;21	DENND5B-202;DENND5B-202	5;5
12	31384612	exon;three_prime_UTR	31382226;31382226	31387786;31387602	-;-	DENND5B;DENND5B	ENSG00000170456.16;ENSG00000170456.16	protein_coding;protein_coding	2;2	21;21	DENND5B-202;DENND5B-202	5;5
12	31386331	exon;three_prime_UTR	31382226;31382226	31387786;31387602	-;-	DENND5B;DENND5B	ENSG00000170456.16;ENSG00000170456.16	protein_coding;protein_coding	2;2	21;21	DENND5B-202;DENND5B-202	5;5
12	31534807	exon	31534715	31535247	-	ANKRD49P2	ENSG00000225349.2	processed_pseudogene	2	1	ANKRD49P2-201	NA
12	31666093	exon;CDS;exon;CDS;exon;CDS;exon;CDS	31666087;31666087;31666087;31666087;31666087;31666087;31666087;31666087	31666217;31666217;31666217;31666217;31666217;31666217;31666217;31666217	+;+;+;+;+;+;+;+	ETFBKMT;ETFBKMT;ETFBKMT;ETFBKMT;ETFBKMT;ETFBKMT;ETFBKMT;ETFBKMT	ENSG00000139160.13;ENSG00000139160.13;ENSG00000139160.13;ENSG00000139160.13;ENSG00000139160.13;ENSG00000139160.13;ENSG00000139160.13;ENSG00000139160.13	protein_coding;protein_coding;protein_coding;protein_coding;protein_coding;protein_coding;protein_coding;protein_coding	2;2;2;2;2;2;2;2	3;3;3;3;4;4;3;3	ETFBKMT-203;ETFBKMT-203;ETFBKMT-202;ETFBKMT-202;ETFBKMT-205;ETFBKMT-205;ETFBKMT-201;ETFBKMT-201	2;2;1;1;1;1;1;1
12	32000430	exon	32000375	32001222	+	AC016957.2	ENSG00000276136.1	lncRNA	2	1	AC016957.2-201	NA
12	32379775	exon;three_prime_UTR;exon;three_prime_UTR	32377540;32377628;32377540;32377540	32383633;32383633;32383633;32383633	+;+;+;+	BICD1;BICD1;BICD1;BICD1	ENSG00000151746.15;ENSG00000151746.15;ENSG00000151746.15;ENSG00000151746.15	protein_coding;protein_coding;protein_coding;protein_coding	2;2;2;2	10;10;9;9	BICD1-210;BICD1-210;BICD1-203;BICD1-203	None;None;1;1
12	32642827	exon;three_prime_UTR	32640276;32640534	32646050;32646050	+;+	FGD4;FGD4	ENSG00000139132.14;ENSG00000139132.14	protein_coding;protein_coding	2;2	17;17	FGD4-202;FGD4-202	2;2
12	3324904	exon	3323349	3325343	+	LINC02827	ENSG00000236908.2	lncRNA	2	2	LINC02827-201	2
12	33432597	exon	33432311	33432853	-	AC023158.2	ENSG00000273853.1	lncRNA	2	1	AC023158.2-201	NA
12	34022280	exon	34022281	34024134	-	AC046130.1	ENSG00000245482.2	lncRNA	2	2	AC046130.1-201	5
12	34058014	exon	34056561	34058377	+	AC046130.2	ENSG00000256538.2	lncRNA	2	3	AC046130.2-201	None
12	38321626	exon;three_prime_UTR	38320161;38321214	38329721;38329721	+;+	ALG10B;ALG10B	ENSG00000175548.9;ENSG00000175548.9	protein_coding;protein_coding	2;2	3;3	ALG10B-201;ALG10B-201	1;1
12	38329294	exon;three_prime_UTR	38320161;38321214	38329721;38329721	+;+	ALG10B;ALG10B	ENSG00000175548.9;ENSG00000175548.9	protein_coding;protein_coding	2;2	3;3	ALG10B-201;ALG10B-201	1;1
12	38653628	exon;three_prime_UTR;exon;three_prime_UTR	38652203;38652203;38652358;38652358	38654070;38653881;38654070;38653881	-;-;-;-	CPNE8;CPNE8;CPNE8;CPNE8	ENSG00000139117.14;ENSG00000139117.14;ENSG00000139117.14;ENSG00000139117.14	protein_coding;protein_coding;protein_coding;protein_coding	2;2;2;2	20;20;8;8	CPNE8-201;CPNE8-201;CPNE8-203;CPNE8-203	1;1;1;1
12	39757219	exon;three_prime_UTR	39755025;39755025	39760252;39760025	-;-	SLC2A13;SLC2A13	ENSG00000151229.13;ENSG00000151229.13	protein_coding;protein_coding	2;2	10;10	SLC2A13-201;SLC2A13-201	1;1
12	40142706	exon	40140926	40142876	-	LINC02555	ENSG00000260943.1	lncRNA	2	1	LINC02555-201	NA
12	40210709	exon	40207791	40211419	+	LINC02471	ENSG00000223914.4	lncRNA	2	7	LINC02471-202	None
12	42232578	exon;three_prime_UTR	42231224;42231224	42235997;42235795	-;-	YAF2;YAF2	ENSG00000015153.15;ENSG00000015153.15	protein_coding;protein_coding	3;3	3;3	YAF2-219;YAF2-219	2;2
12	42996332	exon	42996183	42996486	-	AC012038.1	ENSG00000257373.1	lncRNA	2	1	AC012038.1-201	4
12	43377456	exon;CDS	43377365;43377365	43377562;43377562	-;-	ADAMTS20;ADAMTS20	ENSG00000173157.17;ENSG00000173157.17	protein_coding;protein_coding	2;2	32;32	ADAMTS20-201;ADAMTS20-201	1;1
12	4358738	exon;three_prime_UTR	4352260;4352692	4360028;4360028	+;+	TIGAR;TIGAR	ENSG00000078237.7;ENSG00000078237.7	protein_coding;protein_coding	2;2	6;6	TIGAR-201;TIGAR-201	1;1
12	43721172	exon;three_prime_UTR	43718993;43718993	43730702;43730375	-;-	PUS7L;PUS7L	ENSG00000129317.14;ENSG00000129317.14	protein_coding;protein_coding	2;2	9;9	PUS7L-201;PUS7L-201	1;1
12	43723773	exon;three_prime_UTR	43718993;43718993	43730702;43730375	-;-	PUS7L;PUS7L	ENSG00000129317.14;ENSG00000129317.14	protein_coding;protein_coding	2;2	9;9	PUS7L-201;PUS7L-201	1;1
12	43758679	exon;five_prime_UTR	43758286;43758286	43758758;43758758	-;-	PUS7L;PUS7L	ENSG00000129317.14;ENSG00000129317.14	protein_coding;protein_coding	2;2	1;1	PUS7L-202;PUS7L-202	1;1
12	43799463	exon;CDS;exon;CDS;exon;CDS	43799398;43799398;43799398;43799398;43799398;43799398	43799502;43799502;43799502;43799502;43799502;43799502	-;-;-;-;-;-	TWF1;TWF1;TWF1;TWF1;TWF1;TWF1	ENSG00000151239.14;ENSG00000151239.14;ENSG00000151239.14;ENSG00000151239.14;ENSG00000151239.14;ENSG00000151239.14	protein_coding;protein_coding;protein_coding;protein_coding;protein_coding;protein_coding	2;2;2;2;2;2	6;6;5;5;5;5	TWF1-211;TWF1-211;TWF1-201;TWF1-201;TWF1-207;TWF1-207	1;1;1;1;1;1
12	4405348	exon;three_prime_UTR	4405040;4405040	4405490;4405490	+;+	AC008012.1;AC008012.1	ENSG00000285901.2;ENSG00000285901.2	protein_coding;protein_coding	2;2	10;10	AC008012.1-201;AC008012.1-201	None;None
12	45430195	exon;three_prime_UTR;exon;three_prime_UTR;exon;three_prime_UTR	45429105;45429312;45429105;45429312;45429105;45429312	45431782;45431782;45432349;45432349;45432351;45432351	+;+;+;+;+;+	ANO6;ANO6;ANO6;ANO6;ANO6;ANO6	ENSG00000177119.16;ENSG00000177119.16;ENSG00000177119.16;ENSG00000177119.16;ENSG00000177119.16;ENSG00000177119.16	protein_coding;protein_coding;protein_coding;protein_coding;protein_coding;protein_coding	2;2;2;2;2;2	21;21;20;20;20;20	ANO6-202;ANO6-202;ANO6-201;ANO6-201;ANO6-205;ANO6-205	1;1;1;1;1;1
12	45720366	exon	45718046	45727775	-	AC008124.1	ENSG00000273015.2	lncRNA	2	1	AC008124.1-201	NA
12	45724985	exon	45718046	45727775	-	AC008124.1	ENSG00000273015.2	lncRNA	2	1	AC008124.1-201	NA
12	45726600	exon	45718046	45727775	-	AC008124.1	ENSG00000273015.2	lncRNA	2	1	AC008124.1-201	NA
12	46390303	exon	46388856	46392126	+	AC025031.4	ENSG00000275481.1	lncRNA	2	1	AC025031.4-201	NA
12	4691794	exon;three_prime_UTR	4686938;4687109	4694317;4694317	+;+	NDUFA9;NDUFA9	ENSG00000139180.11;ENSG00000139180.11	protein_coding;protein_coding	2;2	11;11	NDUFA9-201;NDUFA9-201	1;1
12	4693313	exon;three_prime_UTR	4686938;4687109	4694317;4694317	+;+	NDUFA9;NDUFA9	ENSG00000139180.11;ENSG00000139180.11	protein_coding;protein_coding	2;2	11;11	NDUFA9-201;NDUFA9-201	1;1
12	47076695	exon;three_prime_UTR;exon;three_prime_UTR;exon;three_prime_UTR	47075707;47075707;47076498;47076498;47076600;47076600	47079065;47077433;47079065;47077433;47079065;47077433	-;-;-;-;-;-	AMIGO2;AMIGO2;AMIGO2;AMIGO2;AMIGO2;AMIGO2	ENSG00000139211.6;ENSG00000139211.6;ENSG00000139211.6;ENSG00000139211.6;ENSG00000139211.6;ENSG00000139211.6	protein_coding;protein_coding;protein_coding;protein_coding;protein_coding;protein_coding	2;2;2;2;2;2	2;2;3;3;3;3	AMIGO2-201;AMIGO2-201;AMIGO2-203;AMIGO2-203;AMIGO2-202;AMIGO2-202	1;1;1;1;1;1
12	47661635	exon;three_prime_UTR	47661249;47661249	47663590;47663504	-;-	RPAP3;RPAP3	ENSG00000005175.10;ENSG00000005175.10	protein_coding;protein_coding	2;2	17;17	RPAP3-201;RPAP3-201	2;2
12	47699463	exon	47699401	47699917	-	AC004241.3	ENSG00000276390.1	lncRNA	2	1	AC004241.3-201	NA
12	48074776	exon;CDS;exon;CDS;exon;CDS	48074690;48074690;48074690;48074690;48074690;48074690	48074793;48074793;48074793;48074793;48074793;48074793	-;-;-;-;-;-	SENP1;SENP1;SENP1;SENP1;SENP1;SENP1	ENSG00000079387.14;ENSG00000079387.14;ENSG00000079387.14;ENSG00000079387.14;ENSG00000079387.14;ENSG00000079387.14	protein_coding;protein_coding;protein_coding;protein_coding;protein_coding;protein_coding	2;2;2;2;2;2	7;7;7;7;6;6	SENP1-204;SENP1-204;SENP1-201;SENP1-201;SENP1-205;SENP1-205	1;1;1;1;5;5
12	48190694	exon	48189349	48191207	+	AC074029.4	ENSG00000279875.1	TEC	2	1	AC074029.4-201	NA
12	48350290	exon;five_prime_UTR	48350046;48350063	48350771;48350771	-;-	ZNF641;ZNF641	ENSG00000167528.13;ENSG00000167528.13	protein_coding;protein_coding	2;2	1;1	ZNF641-203;ZNF641-203	1;1
12	48528792	exon	48527872	48529897	+	AC089987.1	ENSG00000197376.3	transcribed_processed_pseudogene	2	2	AC089987.1-201	NA
12	48716979	exon;five_prime_UTR	48716515;48716676	48716998;48716998	-;-	CCNT1;CCNT1	ENSG00000129315.11;ENSG00000129315.11	protein_coding;protein_coding	3;3	1;1	CCNT1-205;CCNT1-205	2;2
12	49098062	exon;CDS;exon;CDS	49097944;49097944;49097944;49097944	49098105;49098105;49098105;49098105	-;-;-;-	LMBR1L;LMBR1L;LMBR1L;LMBR1L	ENSG00000139636.15;ENSG00000139636.15;ENSG00000139636.15;ENSG00000139636.15	protein_coding;protein_coding;protein_coding;protein_coding	2;2;2;2	16;16;16;16	LMBR1L-201;LMBR1L-201;LMBR1L-204;LMBR1L-204	1;1;1;1
12	49274314	exon;three_prime_UTR	49272253;49273228	49274600;49274600	+;+	TUBA1C;TUBA1C	ENSG00000167553.16;ENSG00000167553.16	protein_coding;protein_coding	2;2	4;4	TUBA1C-201;TUBA1C-201	1;1
12	49349517	exon;CDS;exon;CDS	49348766;49348873;49348766;49348873	49349712;49349712;49349712;49349712	+;+;+;+	DNAJC22;DNAJC22;DNAJC22;DNAJC22	ENSG00000178401.16;ENSG00000178401.16;ENSG00000178401.16;ENSG00000178401.16	protein_coding;protein_coding;protein_coding;protein_coding	2;2;2;2	3;3;2;2	DNAJC22-202;DNAJC22-202;DNAJC22-201;DNAJC22-201	2;2;1;1
12	49389520	exon	49389516	49390162	+	AC125611.2	ENSG00000257954.1	processed_pseudogene	1	1	AC125611.2-201	NA
12	49637428	exon;three_prime_UTR	49636499;49636499	49645903;49645814	-;-	FMNL3;FMNL3	ENSG00000161791.14;ENSG00000161791.14	protein_coding;protein_coding	2;2	26;26	FMNL3-201;FMNL3-201	1;1
12	49837657	exon;three_prime_UTR	49836043;49836043	49839015;49838370	-;-	BCDIN3D;BCDIN3D	ENSG00000186666.6;ENSG00000186666.6	protein_coding;protein_coding	2;2	2;2	BCDIN3D-201;BCDIN3D-201	1;1
12	49837736	exon;three_prime_UTR	49836043;49836043	49839015;49838370	-;-	BCDIN3D;BCDIN3D	ENSG00000186666.6;ENSG00000186666.6	protein_coding;protein_coding	2;2	2;2	BCDIN3D-201;BCDIN3D-201	1;1
12	49838400	exon;CDS	49836043;49838371	49839015;49839015	-;-	BCDIN3D;BCDIN3D	ENSG00000186666.6;ENSG00000186666.6	protein_coding;protein_coding	2;2	2;2	BCDIN3D-201;BCDIN3D-201	1;1
12	50099639	exon;three_prime_UTR;exon;three_prime_UTR;exon;three_prime_UTR	50098947;50099001;50098947;50099001;50098947;50099001	50100642;50100642;50100707;50100707;50100149;50100149	+;+;+;+;+;+	SMARCD1;SMARCD1;SMARCD1;SMARCD1;SMARCD1;SMARCD1	ENSG00000066117.15;ENSG00000066117.15;ENSG00000066117.15;ENSG00000066117.15;ENSG00000066117.15;ENSG00000066117.15	protein_coding;protein_coding;protein_coding;protein_coding;protein_coding;protein_coding	2;2;2;2;2;2	12;12;13;13;9;9	SMARCD1-201;SMARCD1-201;SMARCD1-202;SMARCD1-202;SMARCD1-205;SMARCD1-205	1;1;1;1;5;5
12	50176902	exon;three_prime_UTR;exon;three_prime_UTR;exon;three_prime_UTR;exon;three_prime_UTR;exon;three_prime_UTR;exon;three_prime_UTR;exon;three_prime_UTR	50175788;50175788;50175788;50175788;50175788;50175788;50175788;50175788;50175788;50175788;50175790;50175790;50176885;50176885	50178069;50177063;50178069;50177063;50178069;50177063;50178069;50177063;50178069;50177063;50178069;50177063;50178069;50177063	-;-;-;-;-;-;-;-;-;-;-;-;-;-	LIMA1;LIMA1;LIMA1;LIMA1;LIMA1;LIMA1;LIMA1;LIMA1;LIMA1;LIMA1;LIMA1;LIMA1;LIMA1;LIMA1	ENSG00000050405.13;ENSG00000050405.13;ENSG00000050405.13;ENSG00000050405.13;ENSG00000050405.13;ENSG00000050405.13;ENSG00000050405.13;ENSG00000050405.13;ENSG00000050405.13;ENSG00000050405.13;ENSG00000050405.13;ENSG00000050405.13;ENSG00000050405.13;ENSG00000050405.13	protein_coding;protein_coding;protein_coding;protein_coding;protein_coding;protein_coding;protein_coding;protein_coding;protein_coding;protein_coding;protein_coding;protein_coding;protein_coding;protein_coding	2;2;2;2;2;2;2;2;2;2;2;2;2;2	5;5;5;5;8;8;11;11;11;11;8;8;8;8	LIMA1-212;LIMA1-212;LIMA1-203;LIMA1-203;LIMA1-215;LIMA1-215;LIMA1-202;LIMA1-202;LIMA1-201;LIMA1-201;LIMA1-214;LIMA1-214;LIMA1-216;LIMA1-216	2;2;1;1;2;2;1;1;1;1;1;1;1;1
12	50743606	exon	50743568	50743684	+	Y_RNA	ENSG00000200428.1	misc_RNA	3	1	Y_RNA.122-201	NA
12	50820095	exon;three_prime_UTR	50819635;50819780	50821162;50821162	+;+	ATF1;ATF1	ENSG00000123268.9;ENSG00000123268.9	protein_coding;protein_coding	2;2	7;7	ATF1-201;ATF1-201	1;1
12	50820682	exon;three_prime_UTR	50819635;50819780	50821162;50821162	+;+	ATF1;ATF1	ENSG00000123268.9;ENSG00000123268.9	protein_coding;protein_coding	2;2	7;7	ATF1-201;ATF1-201	1;1
12	5092719	exon	5089904	5092742	+	AC005906.3	ENSG00000285523.1	lncRNA	2	2	AC005906.3-201	None
12	50980676	exon;three_prime_UTR;exon;three_prime_UTR	50979784;50979784;50979809;50979809	50981803;50981725;50981803;50981803	-;-;-;-	SLC11A2;SLC11A2;SLC11A2;SLC11A2	ENSG00000110911.16;ENSG00000110911.16;ENSG00000110911.16;ENSG00000110911.16	protein_coding;protein_coding;protein_coding;protein_coding	2;2;2;2	17;17;18;18	SLC11A2-229;SLC11A2-229;SLC11A2-228;SLC11A2-228	None;None;None;None
12	52037976	exon;five_prime_UTR	52037715;52037715	52038749;52038709	+;+	NR4A1;NR4A1	ENSG00000123358.20;ENSG00000123358.20	protein_coding;protein_coding	2;2	1;1	NR4A1-206;NR4A1-206	2;2
12	52947724	exon;three_prime_UTR	52946614;52946614	52948828;52948803	-;-	KRT8;KRT8	ENSG00000170421.12;ENSG00000170421.12	protein_coding;protein_coding	2;2	3;3	KRT8-217;KRT8-217	2;2
12	53044188	exon	53043189	53045653	-	AC068888.1	ENSG00000257337.7	lncRNA	2	4	AC068888.1-207	2
12	5318900	exon	5315961	5319347	+	AC006206.1	ENSG00000256146.1	lncRNA	2	1	AC006206.1-201	NA
12	53444035	exon;three_prime_UTR	53443391;53443828	53444091;53444091	+;+	PRR13;PRR13	ENSG00000205352.11;ENSG00000205352.11	protein_coding;protein_coding	2;2	3;3	PRR13-208;PRR13-208	2;2
12	53464604	exon	53464468	53465057	+	PCBP2-OT1	ENSG00000282977.1	lncRNA	2	1	PCBP2-OT1-201	NA
12	53963679	exon;exon	53962308;53963629	53964124;53963697	-;+	HOTAIR;AC012531.5	ENSG00000228630.5;ENSG00000275589.1	lncRNA;misc_RNA	2;3	7;1	HOTAIR-201;AC012531.5-201	5;NA
12	54147467	exon;exon	54146184;54146296	54147483;54147485	+;+	LINC02381;LINC02381	ENSG00000250742.4;ENSG00000250742.4	lncRNA;lncRNA	2;2	3;4	LINC02381-204;LINC02381-202	None;5
12	54238566	exon;three_prime_UTR	54230942;54230942	54241905;54241754	-;-	CBX5;CBX5	ENSG00000094916.16;ENSG00000094916.16	protein_coding;protein_coding	2;2	5;5	CBX5-201;CBX5-201	1;1
12	54238905	exon;three_prime_UTR	54230942;54230942	54241905;54241754	-;-	CBX5;CBX5	ENSG00000094916.16;ENSG00000094916.16	protein_coding;protein_coding	2;2	5;5	CBX5-201;CBX5-201	1;1
12	54544187	exon;three_prime_UTR	54542575;54542686	54548243;54548243	+;+	NCKAP1L;NCKAP1L	ENSG00000123338.13;ENSG00000123338.13	protein_coding;protein_coding	2;2	31;31	NCKAP1L-201;NCKAP1L-201	1;1
12	55365015	exon;five_prime_UTR	55364876;55364876	55369279;55365110	+;+	OR6C75;OR6C75	ENSG00000187857.4;ENSG00000187857.4	protein_coding;protein_coding	2;2	3;3	OR6C75-202;OR6C75-202	None;None
12	55388454	exon;exon	55388420;55388445	55392964;55389374	+;+	OR6C66P;OR6C66P	ENSG00000233606.2;ENSG00000233606.2	transcribed_unprocessed_pseudogene;transcribed_unprocessed_pseudogene	2;2	2;1	OR6C66P-203;OR6C66P-201	None;NA
12	55390129	exon	55388420	55392964	+	OR6C66P	ENSG00000233606.2	transcribed_unprocessed_pseudogene	2	2	OR6C66P-203	None
12	55554443	exon;three_prime_UTR;exon;three_prime_UTR	55551209;55552157;55551209;55552157	55555832;55555832;55555832;55555832	+;+;+;+	OR6C4;OR6C4;OR6C4;OR6C4	ENSG00000179626.4;ENSG00000179626.4;ENSG00000179626.4;ENSG00000179626.4	protein_coding;protein_coding;protein_coding;protein_coding	2;2;2;2	2;2;2;2	OR6C4-203;OR6C4-203;OR6C4-202;OR6C4-202	None;None;None;None
12	55716349	exon;five_prime_UTR	55716292;55716292	55716717;55716717	+;+	BLOC1S1;BLOC1S1	ENSG00000135441.7;ENSG00000135441.7	protein_coding;protein_coding	2;2	1;1	BLOC1S1-201;BLOC1S1-201	2;2
12	55829489	exon;five_prime_UTR	55829489;55829489	55829636;55829636	-;-	DNAJC14;DNAJC14	ENSG00000135392.17;ENSG00000135392.17	protein_coding;protein_coding	2;2	2;2	DNAJC14-202;DNAJC14-202	5;5
12	55993245	exon;three_prime_UTR;exon;three_prime_UTR	55992097;55992213;55992097;55992213	55994706;55994706;55996683;55996683	+;+;+;+	RAB5B;RAB5B;RAB5B;RAB5B	ENSG00000111540.16;ENSG00000111540.16;ENSG00000111540.16;ENSG00000111540.16	protein_coding;protein_coding;protein_coding;protein_coding	2;2;2;2	6;6;6;6	RAB5B-210;RAB5B-210;RAB5B-201;RAB5B-201	1;1;1;1
12	55995586	exon;three_prime_UTR	55992097;55992213	55996683;55996683	+;+	RAB5B;RAB5B	ENSG00000111540.16;ENSG00000111540.16	protein_coding;protein_coding	2;2	6;6	RAB5B-201;RAB5B-201	1;1
12	55996003	exon;three_prime_UTR	55992097;55992213	55996683;55996683	+;+	RAB5B;RAB5B	ENSG00000111540.16;ENSG00000111540.16	protein_coding;protein_coding	2;2	6;6	RAB5B-201;RAB5B-201	1;1
12	56085612	exon;three_prime_UTR	56084995;56085313	56085623;56085623	+;+	ERBB3;ERBB3	ENSG00000065361.16;ENSG00000065361.16	protein_coding;protein_coding	2;2	3;3	ERBB3-202;ERBB3-202	1;1
12	56113876	exon;CDS;stop_codon;exon;three_prime_UTR;exon	56113851;56113851;56113876;56112823;56112889;56113641	56113907;56113878;56113878;56113910;56113910;56113905	+;+;+;+;+;-	PA2G4;PA2G4;PA2G4;PA2G4;PA2G4;AC034102.4	ENSG00000170515.14;ENSG00000170515.14;ENSG00000170515.14;ENSG00000170515.14;ENSG00000170515.14;ENSG00000257553.1	protein_coding;protein_coding;protein_coding;protein_coding;protein_coding;lncRNA	2;2;2;2;2;2	10;10;10;13;13;1	PA2G4-206;PA2G4-206;PA2G4-206;PA2G4-201;PA2G4-201;AC034102.4-201	5;5;5;1;1;5
12	56124541	exon;three_prime_UTR	56120511;56121868	56127514;56127514	+;+	ZC3H10;ZC3H10	ENSG00000135482.7;ENSG00000135482.7	protein_coding;protein_coding	2;2	3;3	ZC3H10-201;ZC3H10-201	1;1
12	56381440	exon	56381109	56381486	-	AC025574.1	ENSG00000259099.2	processed_pseudogene	1	2	AC025574.1-201	NA
12	56511469	exon	56511002	56512703	+	HSPD1P4	ENSG00000257576.1	processed_pseudogene	1	1	HSPD1P4-201	NA
12	56731716	exon;CDS;stop_codon;exon;CDS;stop_codon	56731296;56731715;56731715;56731580;56731715;56731715	56731734;56731734;56731717;56731734;56731734;56731717	-;-;-;-;-;-	PRIM1;PRIM1;PRIM1;PRIM1;PRIM1;PRIM1	ENSG00000198056.15;ENSG00000198056.15;ENSG00000198056.15;ENSG00000198056.15;ENSG00000198056.15;ENSG00000198056.15	protein_coding;protein_coding;protein_coding;protein_coding;protein_coding;protein_coding	2;2;2;2;2;2	14;14;14;13;13;13	PRIM1-209;PRIM1-209;PRIM1-209;PRIM1-201;PRIM1-201;PRIM1-201	None;None;None;1;1;1
12	56823204	exon	56822985	56823704	+	AC121758.2	ENSG00000258679.1	transcribed_processed_pseudogene	2	1	AC121758.2-201	2
12	56988819	exon	56988005	56990756	+	AC026120.3	ENSG00000287715.1	lncRNA	2	2	AC026120.3-201	None
12	57064669	exon;CDS;exon;CDS	57064646;57064646;57064646;57064646	57064739;57064739;57064739;57064739	-;-;-;-	NEMP1;NEMP1;NEMP1;NEMP1	ENSG00000166881.10;ENSG00000166881.10;ENSG00000166881.10;ENSG00000166881.10	protein_coding;protein_coding;protein_coding;protein_coding	2;2;2;2	4;4;5;5	NEMP1-202;NEMP1-202;NEMP1-201;NEMP1-201	1;1;1;1
12	57586604	exon;three_prime_UTR;exon;three_prime_UTR	57584218;57584218;57584218;57584218	57586630;57586630;57586633;57586633	+;+;+;+	KIF5A;KIF5A;KIF5A;KIF5A	ENSG00000155980.13;ENSG00000155980.13;ENSG00000155980.13;ENSG00000155980.13	protein_coding;protein_coding;protein_coding;protein_coding	2;2;2;2	30;30;29;29	KIF5A-204;KIF5A-204;KIF5A-202;KIF5A-202	None;None;1;1
12	57748221	exon;three_prime_UTR;exon;three_prime_UTR;exon;three_prime_UTR;exon;three_prime_UTR	57747216;57747291;57747216;57747291;57747727;57747727;57747727;57747727	57750211;57750211;57750219;57750219;57748617;57748524;57748617;57748617	+;+;+;+;-;-;-;-	TSPAN31;TSPAN31;TSPAN31;TSPAN31;CDK4;CDK4;CDK4;CDK4	ENSG00000135452.10;ENSG00000135452.10;ENSG00000135452.10;ENSG00000135452.10;ENSG00000135446.17;ENSG00000135446.17;ENSG00000135446.17;ENSG00000135446.17	protein_coding;protein_coding;protein_coding;protein_coding;protein_coding;protein_coding;protein_coding;protein_coding	2;2;2;2;2;2;3;3	4;4;6;6;8;8;7;7	TSPAN31-206;TSPAN31-206;TSPAN31-201;TSPAN31-201;CDK4-201;CDK4-201;CDK4-202;CDK4-202	1;1;1;1;1;1;1;1
12	57773039	exon;CDS;exon;five_prime_UTR;exon;CDS;exon;CDS;exon;CDS	57773017;57773017;57773017;57773017;57773017;57773017;57773017;57773017;57773017;57773017	57773128;57773128;57773128;57773128;57773128;57773128;57773128;57773128;57773128;57773128	+;+;+;+;+;+;+;+;+;+	EEF1AKMT3;EEF1AKMT3;EEF1AKMT3;EEF1AKMT3;EEF1AKMT3;EEF1AKMT3;EEF1AKMT3;EEF1AKMT3;AC025165.3;AC025165.3	ENSG00000123427.17;ENSG00000123427.17;ENSG00000123427.17;ENSG00000123427.17;ENSG00000123427.17;ENSG00000123427.17;ENSG00000123427.17;ENSG00000123427.17;ENSG00000257921.6;ENSG00000257921.6	protein_coding;protein_coding;protein_coding;protein_coding;protein_coding;protein_coding;protein_coding;protein_coding;protein_coding;protein_coding	2;2;1;1;2;2;2;2;2;2	2;2;2;2;2;2;2;2;2;2	EEF1AKMT3-203;EEF1AKMT3-203;EEF1AKMT3-204;EEF1AKMT3-204;EEF1AKMT3-201;EEF1AKMT3-201;EEF1AKMT3-202;EEF1AKMT3-202;AC025165.3-201;AC025165.3-201	4;4;2;2;1;1;1;1;None;None
12	57808048	exon;three_prime_UTR	57807864;57807896	57808071;57808071	+;+	TSFM;TSFM	ENSG00000123297.20;ENSG00000123297.20	protein_coding;protein_coding	1;1	6;6	TSFM-208;TSFM-208	3;3
12	58095223	exon	58094914	58098013	-	AC090643.1	ENSG00000279134.1	TEC	2	1	AC090643.1-201	NA
12	59775038	exon;CDS;exon;CDS;exon;CDS;exon;CDS	59774657;59774657;59774657;59774657;59774657;59774657;59774657;59774657	59775475;59775475;59775475;59775475;59775475;59775475;59775475;59775475	+;+;+;+;+;+;+;+	SLC16A7;SLC16A7;SLC16A7;SLC16A7;SLC16A7;SLC16A7;SLC16A7;SLC16A7	ENSG00000118596.12;ENSG00000118596.12;ENSG00000118596.12;ENSG00000118596.12;ENSG00000118596.12;ENSG00000118596.12;ENSG00000118596.12;ENSG00000118596.12	protein_coding;protein_coding;protein_coding;protein_coding;protein_coding;protein_coding;protein_coding;protein_coding	2;2;2;2;2;2;2;2	5;5;5;5;6;6;4;4	SLC16A7-203;SLC16A7-203;SLC16A7-216;SLC16A7-216;SLC16A7-214;SLC16A7-214;SLC16A7-201;SLC16A7-201	1;1;1;1;5;5;1;1
12	59789847	exon;three_prime_UTR	59779423;59779680	59789855;59789855	+;+	SLC16A7;SLC16A7	ENSG00000118596.12;ENSG00000118596.12	protein_coding;protein_coding	2;2	5;5	SLC16A7-201;SLC16A7-201	1;1
12	62408379	exon;three_prime_UTR;exon;three_prime_UTR	62404193;62404376;62404193;62404376	62416389;62416389;62416389;62416389	+;+;+;+	USP15;USP15;USP15;USP15	ENSG00000135655.16;ENSG00000135655.16;ENSG00000135655.16;ENSG00000135655.16	protein_coding;protein_coding;protein_coding;protein_coding	2;2;2;2	21;21;22;22	USP15-203;USP15-203;USP15-201;USP15-201	1;1;1;1
12	62413716	exon;three_prime_UTR;exon;three_prime_UTR	62404193;62404376;62404193;62404376	62416389;62416389;62416389;62416389	+;+;+;+	USP15;USP15;USP15;USP15	ENSG00000135655.16;ENSG00000135655.16;ENSG00000135655.16;ENSG00000135655.16	protein_coding;protein_coding;protein_coding;protein_coding	2;2;2;2	21;21;22;22	USP15-203;USP15-203;USP15-201;USP15-201	1;1;1;1
12	62578493	exon;CDS;exon;CDS;exon;CDS;exon;CDS;exon;CDS	62578445;62578445;62578445;62578445;62578445;62578445;62578445;62578445;62578445;62578445	62578505;62578505;62578505;62578505;62578505;62578505;62578505;62578505;62578505;62578505	+;+;+;+;+;+;+;+;+;+	MON2;MON2;MON2;MON2;MON2;MON2;MON2;MON2;MON2;MON2	ENSG00000061987.16;ENSG00000061987.16;ENSG00000061987.16;ENSG00000061987.16;ENSG00000061987.16;ENSG00000061987.16;ENSG00000061987.16;ENSG00000061987.16;ENSG00000061987.16;ENSG00000061987.16	protein_coding;protein_coding;protein_coding;protein_coding;protein_coding;protein_coding;protein_coding;protein_coding;protein_coding;protein_coding	2;2;2;2;2;2;1;1;2;2	32;32;31;31;31;31;30;30;30;30	MON2-214;MON2-214;MON2-203;MON2-203;MON2-202;MON2-202;MON2-213;MON2-213;MON2-201;MON2-201	None;None;1;1;1;1;1;1;1;1
12	62620072	exon	62613605	62622213	+	AC048341.1	ENSG00000257354.2	lncRNA	2	2	AC048341.1-201	4
12	63682874	exon	63682523	63685083	-	AC084357.3	ENSG00000255583.2	transcribed_unprocessed_pseudogene	2	3	AC084357.3-201	5
12	63805540	exon	63804739	63805880	-	RXYLT1-AS1	ENSG00000255850.2	lncRNA	2	2	RXYLT1-AS1-202	None
12	63888049	exon	63887379	63888598	-	AC079866.1	ENSG00000256399.1	processed_pseudogene	1	1	AC079866.1-201	NA
12	64143279	exon;three_prime_UTR;exon;three_prime_UTR;exon;three_prime_UTR	64142295;64142673;64142295;64142673;64142295;64142673	64162217;64162217;64147833;64147833;64143780;64143780	+;+;+;+;+;+	SRGAP1;SRGAP1;SRGAP1;SRGAP1;SRGAP1;SRGAP1	ENSG00000196935.9;ENSG00000196935.9;ENSG00000196935.9;ENSG00000196935.9;ENSG00000196935.9;ENSG00000196935.9	protein_coding;protein_coding;protein_coding;protein_coding;protein_coding;protein_coding	2;2;3;3;2;2	22;22;22;22;21;21	SRGAP1-201;SRGAP1-201;SRGAP1-207;SRGAP1-207;SRGAP1-206;SRGAP1-206	1;1;5;5;1;1
12	64144254	exon;three_prime_UTR;exon;three_prime_UTR	64142295;64142673;64142295;64142673	64162217;64162217;64147833;64147833	+;+;+;+	SRGAP1;SRGAP1;SRGAP1;SRGAP1	ENSG00000196935.9;ENSG00000196935.9;ENSG00000196935.9;ENSG00000196935.9	protein_coding;protein_coding;protein_coding;protein_coding	2;2;3;3	22;22;22;22	SRGAP1-201;SRGAP1-201;SRGAP1-207;SRGAP1-207	1;1;5;5
12	64154972	exon;three_prime_UTR	64142295;64142673	64162217;64162217	+;+	SRGAP1;SRGAP1	ENSG00000196935.9;ENSG00000196935.9	protein_coding;protein_coding	2;2	22;22	SRGAP1-201;SRGAP1-201	1;1
12	64192951	exon;three_prime_UTR;exon;three_prime_UTR	64192639;64192639;64191080;64191080	64194658;64193841;64194658;64193841	-;-;-;-	C12orf66;C12orf66;C12orf66;C12orf66	ENSG00000174206.13;ENSG00000174206.13;ENSG00000174206.13;ENSG00000174206.13	protein_coding;protein_coding;protein_coding;protein_coding	1;1;2;2	3;3;3;3	C12orf66-204;C12orf66-204;C12orf66-202;C12orf66-202	2;2;1;1
12	64266937	exon;three_prime_UTR;exon;three_prime_UTR	64264762;64264762;64264762;64264762	64267288;64267182;64267288;64267182	-;-;-;-	C12orf56;C12orf56;C12orf56;C12orf56	ENSG00000185306.13;ENSG00000185306.13;ENSG00000185306.13;ENSG00000185306.13	protein_coding;protein_coding;protein_coding;protein_coding	2;2;1;1	11;11;13;13	C12orf56-201;C12orf56-201;C12orf56-207;C12orf56-207	1;1;5;5
12	64875939	exon;three_prime_UTR;exon;three_prime_UTR;exon;three_prime_UTR;exon;three_prime_UTR	64875001;64875789;64875001;64875789;64875001;64875789;64875001;64875789	64878623;64878623;64876935;64876935;64881032;64881032;64881033;64881033	+;+;+;+;+;+;+;+	TBC1D30;TBC1D30;AC078815.1;AC078815.1;TBC1D30;TBC1D30;TBC1D30;TBC1D30	ENSG00000111490.15;ENSG00000111490.15;ENSG00000288591.1;ENSG00000288591.1;ENSG00000111490.15;ENSG00000111490.15;ENSG00000111490.15;ENSG00000111490.15	protein_coding;protein_coding;protein_coding;protein_coding;protein_coding;protein_coding;protein_coding;protein_coding	2;2;2;2;2;2;2;2	14;14;14;14;13;13;12;12	TBC1D30-208;TBC1D30-208;AC078815.1-201;AC078815.1-201;TBC1D30-205;TBC1D30-205;TBC1D30-204;TBC1D30-204	None;None;None;None;1;1;1;1
12	6531523	exon;three_prime_UTR	6531327;6531413	6531955;6531955	+;+	NCAPD2;NCAPD2	ENSG00000010292.13;ENSG00000010292.13	protein_coding;protein_coding	2;2	32;32	NCAPD2-201;NCAPD2-201	1;1
12	66066264	exon	66066221	66066338	+	RNA5SP362	ENSG00000251857.1	rRNA_pseudogene	3	1	RNA5SP362-201	NA
12	66136096	exon;three_prime_UTR	66135846;66135846	66138166;66137959	-;-	TMBIM4;TMBIM4	ENSG00000155957.18;ENSG00000155957.18	protein_coding;protein_coding	2;2	7;7	TMBIM4-202;TMBIM4-202	1;1
12	66254297	exon;three_prime_UTR	66247695;66248172	66254622;66254622	+;+	IRAK3;IRAK3	ENSG00000090376.11;ENSG00000090376.11	protein_coding;protein_coding	2;2	12;12	IRAK3-201;IRAK3-201	1;1
12	66348889	exon;three_prime_UTR;exon;three_prime_UTR	66347431;66347431;66347431;66347431	66349246;66349018;66349246;66349018	-;-;-;-	GRIP1;GRIP1;GRIP1;GRIP1	ENSG00000155974.12;ENSG00000155974.12;ENSG00000155974.12;ENSG00000155974.12	protein_coding;protein_coding;protein_coding;protein_coding	2;2;3;3	24;24;25;25	GRIP1-202;GRIP1-202;GRIP1-201;GRIP1-201	1;1;5;5
12	6666650	exon;exon;three_prime_UTR;exon;three_prime_UTR	6666648;6666477;6666477;6666648;6666648	6668115;6668115;6667713;6668115;6667713	+;-;-;-;-	AC125494.1;ZNF384;ZNF384;ZNF384;ZNF384	ENSG00000219410.6;ENSG00000126746.17;ENSG00000126746.17;ENSG00000126746.17;ENSG00000126746.17	lncRNA;protein_coding;protein_coding;protein_coding;protein_coding	3;2;2;2;2	1;10;10;11;11	AC125494.1-202;ZNF384-201;ZNF384-201;ZNF384-204;ZNF384-204	1;2;2;2;2
12	67670919	exon	67670849	67670919	-	AC078777.1	ENSG00000235872.2	lncRNA	1	1	AC078777.1-201	5
12	67990008	exon	67989947	67990048	+	IFNG-AS1	ENSG00000255733.6	lncRNA	2	2	IFNG-AS1-204	None
12	68325674	exon;three_prime_UTR;exon;three_prime_UTR	68325005;68325005;68325121;68325121	68327510;68327433;68327021;68326485	-;-;-;-	MDM1;MDM1;MDM1;MDM1	ENSG00000111554.14;ENSG00000111554.14;ENSG00000111554.14;ENSG00000111554.14	protein_coding;protein_coding;protein_coding;protein_coding	2;2;2;2	3;3;3;3	MDM1-203;MDM1-203;MDM1-205;MDM1-205	1;1;1;1
12	68333648	exon	68332888	68333664	-	LINC02384	ENSG00000251301.7	lncRNA	2	3	LINC02384-209	None
12	6851713	exon;five_prime_UTR	6851222;6851222	6852066;6852066	-;-	CDCA3;CDCA3	ENSG00000111665.11;ENSG00000111665.11	protein_coding;protein_coding	2;2	1;1	CDCA3-207;CDCA3-207	1;1
12	6885162	exon;exon	6884682;6884898	6885786;6885377	+;+	DSTNP2;DSTNP2	ENSG00000248593.3;ENSG00000248593.3	transcribed_unprocessed_pseudogene;transcribed_unprocessed_pseudogene	2;1	1;1	DSTNP2-202;DSTNP2-201	NA;NA
12	6885275	exon;exon	6884682;6884898	6885786;6885377	+;+	DSTNP2;DSTNP2	ENSG00000248593.3;ENSG00000248593.3	transcribed_unprocessed_pseudogene;transcribed_unprocessed_pseudogene	2;1	1;1	DSTNP2-202;DSTNP2-201	NA;NA
12	69354195	exon;exon;three_prime_UTR	69353743;69353153;69353220	69354225;69354234;69354234	-;+;+	AC020656.1;LYZ;LYZ	ENSG00000257764.2;ENSG00000090382.7;ENSG00000090382.7	lncRNA;protein_coding;protein_coding	2;2;2	1;4;4	AC020656.1-201;LYZ-201;LYZ-201	3;1;1
12	69818056	exon;three_prime_UTR;exon;three_prime_UTR	69815364;69815447;69815364;69815447	69823199;69823199;69823204;69823204	+;+;+;+	RAB3IP;RAB3IP;RAB3IP;RAB3IP	ENSG00000127328.22;ENSG00000127328.22;ENSG00000127328.22;ENSG00000127328.22	protein_coding;protein_coding;protein_coding;protein_coding	2;2;2;2	11;11;11;11	RAB3IP-201;RAB3IP-201;RAB3IP-212;RAB3IP-212	1;1;1;1
12	69821717	exon;three_prime_UTR;exon;three_prime_UTR	69815364;69815447;69815364;69815447	69823199;69823199;69823204;69823204	+;+;+;+	RAB3IP;RAB3IP;RAB3IP;RAB3IP	ENSG00000127328.22;ENSG00000127328.22;ENSG00000127328.22;ENSG00000127328.22	protein_coding;protein_coding;protein_coding;protein_coding	2;2;2;2	11;11;11;11	RAB3IP-201;RAB3IP-201;RAB3IP-212;RAB3IP-212	1;1;1;1
12	69958561	exon;three_prime_UTR;exon;three_prime_UTR;exon;three_prime_UTR;exon;three_prime_UTR	69958445;69958532;69958445;69958532;69958445;69958532;69958445;69958532	69959097;69959097;69959097;69959097;69958607;69958607;69958598;69958598	+;+;+;+;+;+;+;+	MYRFL;MYRFL;MYRFL;MYRFL;MYRFL;MYRFL;MYRFL;MYRFL	ENSG00000166268.11;ENSG00000166268.11;ENSG00000166268.11;ENSG00000166268.11;ENSG00000166268.11;ENSG00000166268.11;ENSG00000166268.11;ENSG00000166268.11	protein_coding;protein_coding;protein_coding;protein_coding;protein_coding;protein_coding;protein_coding;protein_coding	2;2;2;2;2;2;3;3	25;25;25;25;9;9;9;9	MYRFL-205;MYRFL-205;MYRFL-203;MYRFL-203;MYRFL-202;MYRFL-202;MYRFL-201;MYRFL-201	5;5;5;5;1;1;5;5
12	70321807	exon	70321542	70324274	-	AC092881.1	ENSG00000279530.2	TEC	2	1	AC092881.1-201	NA
12	70353938	exon;three_prime_UTR;exon;three_prime_UTR	70353829;70353916;70353829;70353916	70354992;70354992;70354993;70354993	+;+;+;+	CNOT2;CNOT2;CNOT2;CNOT2	ENSG00000111596.13;ENSG00000111596.13;ENSG00000111596.13;ENSG00000111596.13	protein_coding;protein_coding;protein_coding;protein_coding	3;3;2;2	16;16;17;17	CNOT2-201;CNOT2-201;CNOT2-202;CNOT2-202	1;1;1;1
12	70517004	exon;three_prime_UTR	70515866;70515866	70521511;70521488	-;-	PTPRB;PTPRB	ENSG00000127329.15;ENSG00000127329.15	protein_coding;protein_coding	2;2	34;34	PTPRB-202;PTPRB-202	1;1
12	72264488	exon;exon	72264482;72261198	72264621;72264621	-;-	TRHDE-AS1;TRHDE-AS1	ENSG00000236333.4;ENSG00000236333.4	lncRNA;lncRNA	2;2	3;4	TRHDE-AS1-215;TRHDE-AS1-201	None;5
12	7324301	exon;CDS	7324273;7324273	7324400;7324400	+;+	ACSM4;ACSM4	ENSG00000215009.5;ENSG00000215009.5	protein_coding;protein_coding	1;1	10;10	ACSM4-201;ACSM4-201	5;5
12	73942147	exon;exon	73942117;73940797	73942261;73942261	-;-	LINC02882;LINC02882	ENSG00000251138.7;ENSG00000251138.7	lncRNA;lncRNA	2;2	9;9	LINC02882-211;LINC02882-206	None;None
12	74543609	exon;three_prime_UTR	74537835;74538407	74545430;74545430	+;+	ATXN7L3B;ATXN7L3B	ENSG00000253719.4;ENSG00000253719.4	protein_coding;protein_coding	2;2	1;1	ATXN7L3B-201;ATXN7L3B-201	NA;NA
12	75251856	exon	75250493	75251865	+	CAPS2-AS1	ENSG00000254451.2	lncRNA	2	2	CAPS2-AS1-202	2
12	75278413	exon;three_prime_UTR	75277211;75277211	75279065;75278889	-;-	CAPS2;CAPS2	ENSG00000180881.19;ENSG00000180881.19	protein_coding;protein_coding	2;2	17;17	CAPS2-203;CAPS2-203	1;1
12	75495836	exon;three_prime_UTR	75490863;75490863	75499951;75499808	-;-	KRR1;KRR1	ENSG00000111615.14;ENSG00000111615.14	protein_coding;protein_coding	2;2	10;10	KRR1-201;KRR1-201	1;1
12	76026141	exon;three_prime_UTR;exon;three_prime_UTR;exon;three_prime_UTR	76025447;76025447;76025447;76025447;76025447;76025447	76030092;76030092;76030092;76030092;76030092;76030092	-;-;-;-;-;-	PHLDA1;PHLDA1;PHLDA1;PHLDA1;PHLDA1;PHLDA1	ENSG00000139289.13;ENSG00000139289.13;ENSG00000139289.13;ENSG00000139289.13;ENSG00000139289.13;ENSG00000139289.13	protein_coding;protein_coding;protein_coding;protein_coding;protein_coding;protein_coding	2;2;3;3;2;2	2;2;2;2;2;2	PHLDA1-202;PHLDA1-202;PHLDA1-203;PHLDA1-203;PHLDA1-201;PHLDA1-201	1;1;1;1;1;1
12	76028083	exon;three_prime_UTR;exon;three_prime_UTR;exon;three_prime_UTR	76025447;76025447;76025447;76025447;76025447;76025447	76030092;76030092;76030092;76030092;76030092;76030092	-;-;-;-;-;-	PHLDA1;PHLDA1;PHLDA1;PHLDA1;PHLDA1;PHLDA1	ENSG00000139289.13;ENSG00000139289.13;ENSG00000139289.13;ENSG00000139289.13;ENSG00000139289.13;ENSG00000139289.13	protein_coding;protein_coding;protein_coding;protein_coding;protein_coding;protein_coding	2;2;3;3;2;2	2;2;2;2;2;2	PHLDA1-202;PHLDA1-202;PHLDA1-203;PHLDA1-203;PHLDA1-201;PHLDA1-201	1;1;1;1;1;1
12	76033296	exon;five_prime_UTR;exon	76030510;76031742;76033264	76033932;76033932;76033897	-;-;+	PHLDA1;PHLDA1;AC011611.4	ENSG00000139289.13;ENSG00000139289.13;ENSG00000257839.1	protein_coding;protein_coding;lncRNA	2;2;1	1;1;2	PHLDA1-201;PHLDA1-201;AC011611.4-201	1;1;2
12	76045137	exon;three_prime_UTR	76036585;76036585	76048464;76048428	-;-	NAP1L1;NAP1L1	ENSG00000187109.15;ENSG00000187109.15	protein_coding;protein_coding	2;2	15;15	NAP1L1-226;NAP1L1-226	1;1
12	76048312	exon;three_prime_UTR;exon;three_prime_UTR;exon;three_prime_UTR;exon;three_prime_UTR;exon;three_prime_UTR	76047595;76047595;76047632;76047632;76047967;76047967;76048030;76048030;76036585;76036585	76048464;76048428;76048464;76048428;76048464;76048428;76048464;76048428;76048464;76048428	-;-;-;-;-;-;-;-;-;-	NAP1L1;NAP1L1;NAP1L1;NAP1L1;NAP1L1;NAP1L1;NAP1L1;NAP1L1;NAP1L1;NAP1L1	ENSG00000187109.15;ENSG00000187109.15;ENSG00000187109.15;ENSG00000187109.15;ENSG00000187109.15;ENSG00000187109.15;ENSG00000187109.15;ENSG00000187109.15;ENSG00000187109.15;ENSG00000187109.15	protein_coding;protein_coding;protein_coding;protein_coding;protein_coding;protein_coding;protein_coding;protein_coding;protein_coding;protein_coding	2;2;2;2;2;2;2;2;2;2	13;13;13;13;12;12;14;14;15;15	NAP1L1-202;NAP1L1-202;NAP1L1-209;NAP1L1-209;NAP1L1-205;NAP1L1-205;NAP1L1-204;NAP1L1-204;NAP1L1-226;NAP1L1-226	2;2;5;5;2;2;2;2;1;1
12	76351917	exon;three_prime_UTR;exon;three_prime_UTR;exon;three_prime_UTR	76351797;76351797;76351797;76351797;76351800;76351800	76356021;76355888;76356021;76355888;76356021;76355888	-;-;-;-;-;-	OSBPL8;OSBPL8;OSBPL8;OSBPL8;OSBPL8;OSBPL8	ENSG00000091039.17;ENSG00000091039.17;ENSG00000091039.17;ENSG00000091039.17;ENSG00000091039.17;ENSG00000091039.17	protein_coding;protein_coding;protein_coding;protein_coding;protein_coding;protein_coding	2;2;2;2;3;3	26;26;24;24;24;24	OSBPL8-202;OSBPL8-202;OSBPL8-201;OSBPL8-201;OSBPL8-218;OSBPL8-218	1;1;1;1;1;1
12	76353097	exon;three_prime_UTR;exon;three_prime_UTR;exon;three_prime_UTR	76351797;76351797;76351797;76351797;76351800;76351800	76356021;76355888;76356021;76355888;76356021;76355888	-;-;-;-;-;-	OSBPL8;OSBPL8;OSBPL8;OSBPL8;OSBPL8;OSBPL8	ENSG00000091039.17;ENSG00000091039.17;ENSG00000091039.17;ENSG00000091039.17;ENSG00000091039.17;ENSG00000091039.17	protein_coding;protein_coding;protein_coding;protein_coding;protein_coding;protein_coding	2;2;2;2;3;3	26;26;24;24;24;24	OSBPL8-202;OSBPL8-202;OSBPL8-201;OSBPL8-201;OSBPL8-218;OSBPL8-218	1;1;1;1;1;1
12	7729426	exon;three_prime_UTR;exon;three_prime_UTR	7729415;7729415;7729415;7729415	7729740;7729595;7729740;7729595	-;-;-;-	CLEC4C;CLEC4C;CLEC4C;CLEC4C	ENSG00000198178.10;ENSG00000198178.10;ENSG00000198178.10;ENSG00000198178.10	protein_coding;protein_coding;protein_coding;protein_coding	2;2;2;2	7;7;7;7	CLEC4C-205;CLEC4C-205;CLEC4C-201;CLEC4C-201	1;1;5;5
12	7798776	exon;three_prime_UTR	7794679;7795096	7799146;7799146	+;+	NANOG;NANOG	ENSG00000111704.11;ENSG00000111704.11	protein_coding;protein_coding	2;2	4;4	NANOG-201;NANOG-201	1;1
12	78442828	exon	78442141	78442952	-	AC130415.1	ENSG00000257879.1	lncRNA	2	1	AC130415.1-201	4
12	79590614	exon;three_prime_UTR	79584879;79584879	79592693;79592606	-;-	PAWR;PAWR	ENSG00000177425.11;ENSG00000177425.11	protein_coding;protein_coding	2;2	7;7	PAWR-201;PAWR-201	1;1
12	80343536	exon	80343515	80343792	-	RN7SKP261	ENSG00000222880.1	misc_RNA	3	1	RN7SKP261-201	NA
12	80370668	exon;CDS;exon;CDS;exon;CDS	80370570;80370570;80370570;80370570;80370570;80370570	80370689;80370689;80370689;80370689;80370689;80370689	+;+;+;+;+;+	OTOGL;OTOGL;OTOGL;OTOGL;OTOGL;OTOGL	ENSG00000165899.11;ENSG00000165899.11;ENSG00000165899.11;ENSG00000165899.11;ENSG00000165899.11;ENSG00000165899.11	protein_coding;protein_coding;protein_coding;protein_coding;protein_coding;protein_coding	2;2;2;2;3;3	60;60;56;56;55;55	OTOGL-209;OTOGL-209;OTOGL-204;OTOGL-204;OTOGL-202;OTOGL-202	None;None;5;5;5;5
12	80378970	exon;three_prime_UTR;exon;three_prime_UTR;exon;three_prime_UTR	80377848;80378049;80377848;80378049;80377848;80378049	80379090;80379090;80379960;80379960;80380879;80380879	+;+;+;+;+;+	OTOGL;OTOGL;OTOGL;OTOGL;OTOGL;OTOGL	ENSG00000165899.11;ENSG00000165899.11;ENSG00000165899.11;ENSG00000165899.11;ENSG00000165899.11;ENSG00000165899.11	protein_coding;protein_coding;protein_coding;protein_coding;protein_coding;protein_coding	3;3;2;2;2;2	58;58;63;63;59;59	OTOGL-202;OTOGL-202;OTOGL-209;OTOGL-209;OTOGL-204;OTOGL-204	5;5;None;None;5;5
12	8081123	exon	8080381	8082163	-	AC006511.3	ENSG00000279865.1	TEC	2	1	AC006511.3-201	NA
12	81261092	exon;three_prime_UTR	81254857;81254923	81261210;81261210	+;+	ACSS3;ACSS3	ENSG00000111058.8;ENSG00000111058.8	protein_coding;protein_coding	2;2	16;16	ACSS3-203;ACSS3-203	1;1
12	81312367	exon	81312047	81312373	+	PPFIA2-AS1	ENSG00000257467.6	lncRNA	2	6	PPFIA2-AS1-209	5
12	82352570	exon;three_prime_UTR	82352303;82352303	82353312;82353150	-;-	CCDC59;CCDC59	ENSG00000133773.12;ENSG00000133773.12	protein_coding;protein_coding	2;2	4;4	CCDC59-201;CCDC59-201	1;1
12	85803184	exon;three_prime_UTR	85800703;85800703	85805962;85804701	-;-	RASSF9;RASSF9	ENSG00000198774.5;ENSG00000198774.5	protein_coding;protein_coding	2;2	2;2	RASSF9-201;RASSF9-201	1;1
12	85836249	exon;five_prime_UTR	85836155;85836202	85836409;85836409	-;-	RASSF9;RASSF9	ENSG00000198774.5;ENSG00000198774.5	protein_coding;protein_coding	2;2	1;1	RASSF9-201;RASSF9-201	1;1
12	85960790	exon;exon;three_prime_UTR	85960565;85955666;85955666	85960946;85980430;85979288	+;-;-	AC016993.1;MGAT4C;MGAT4C	ENSG00000258178.1;ENSG00000182050.13;ENSG00000182050.13	lncRNA;protein_coding;protein_coding	2;2;2	2;4;4	AC016993.1-201;MGAT4C-209;MGAT4C-209	3;5;5
12	8603161	exon;three_prime_UTR	8602170;8602170	8604337;8604283	-;-	AICDA;AICDA	ENSG00000111732.11;ENSG00000111732.11	protein_coding;protein_coding	2;2	5;5	AICDA-201;AICDA-201	1;1
12	8774588	exon;three_prime_UTR;exon;three_prime_UTR;exon;three_prime_UTR	8773321;8773785;8773321;8773785;8773321;8773785	8777191;8777191;8777191;8777191;8777190;8777190	+;+;+;+;+;+	RIMKLB;RIMKLB;RIMKLB;RIMKLB;RIMKLB;RIMKLB	ENSG00000166532.16;ENSG00000166532.16;ENSG00000166532.16;ENSG00000166532.16;ENSG00000166532.16;ENSG00000166532.16	protein_coding;protein_coding;protein_coding;protein_coding;protein_coding;protein_coding	3;3;2;2;2;2	7;7;6;6;6;6	RIMKLB-202;RIMKLB-202;RIMKLB-205;RIMKLB-205;RIMKLB-207;RIMKLB-207	5;5;2;2;1;1
12	87782870	exon	87782163	87783456	-	MKRN9P	ENSG00000258128.2	transcribed_processed_pseudogene	2	1	MKRN9P-202	NA
12	87782886	exon	87782163	87783456	-	MKRN9P	ENSG00000258128.2	transcribed_processed_pseudogene	2	1	MKRN9P-202	NA
12	87782887	exon	87782163	87783456	-	MKRN9P	ENSG00000258128.2	transcribed_processed_pseudogene	2	1	MKRN9P-202	NA
12	87782985	exon	87782163	87783456	-	MKRN9P	ENSG00000258128.2	transcribed_processed_pseudogene	2	1	MKRN9P-202	NA
12	88049301	exon;three_prime_UTR;exon;CDS;exon;CDS;exon;CDS;exon;CDS;exon;CDS;exon;CDS;exon;CDS	88048234;88048423;88049016;88049184;88049016;88049184;88049016;88049184;88049016;88049184;88049016;88049184;88049016;88049184;88049016;88049184	88050160;88050160;88049414;88049414;88049414;88049414;88049414;88049414;88049414;88049414;88049414;88049414;88049414;88049414;88049414;88049414	+;+;-;-;-;-;-;-;-;-;-;-;-;-;-;-	C12orf29;C12orf29;CEP290;CEP290;CEP290;CEP290;CEP290;CEP290;CEP290;CEP290;CEP290;CEP290;CEP290;CEP290;CEP290;CEP290	ENSG00000133641.18;ENSG00000133641.18;ENSG00000198707.17;ENSG00000198707.17;ENSG00000198707.17;ENSG00000198707.17;ENSG00000198707.17;ENSG00000198707.17;ENSG00000198707.17;ENSG00000198707.17;ENSG00000198707.17;ENSG00000198707.17;ENSG00000198707.17;ENSG00000198707.17;ENSG00000198707.17;ENSG00000198707.17	protein_coding;protein_coding;protein_coding;protein_coding;protein_coding;protein_coding;protein_coding;protein_coding;protein_coding;protein_coding;protein_coding;protein_coding;protein_coding;protein_coding;protein_coding;protein_coding	2;2;2;2;2;2;2;2;2;2;2;2;2;2;2;2	7;7;54;54;53;53;55;55;56;56;55;55;53;53;53;53	C12orf29-201;C12orf29-201;CEP290-207;CEP290-207;CEP290-213;CEP290-213;CEP290-225;CEP290-225;CEP290-221;CEP290-221;CEP290-201;CEP290-201;CEP290-220;CEP290-220;CEP290-218;CEP290-218	1;1;1;1;None;None;None;None;None;None;5;5;None;None;None;None
12	88084751	exon;CDS;exon;CDS;exon;CDS;exon;CDS;exon;CDS;exon;CDS;exon;CDS	88084586;88084586;88084586;88084586;88084586;88084586;88084586;88084586;88084586;88084586;88084586;88084586;88084586;88084586	88084852;88084852;88084852;88084852;88084852;88084852;88084852;88084852;88084852;88084852;88084852;88084852;88084852;88084852	-;-;-;-;-;-;-;-;-;-;-;-;-;-	CEP290;CEP290;CEP290;CEP290;CEP290;CEP290;CEP290;CEP290;CEP290;CEP290;CEP290;CEP290;CEP290;CEP290	ENSG00000198707.17;ENSG00000198707.17;ENSG00000198707.17;ENSG00000198707.17;ENSG00000198707.17;ENSG00000198707.17;ENSG00000198707.17;ENSG00000198707.17;ENSG00000198707.17;ENSG00000198707.17;ENSG00000198707.17;ENSG00000198707.17;ENSG00000198707.17;ENSG00000198707.17	protein_coding;protein_coding;protein_coding;protein_coding;protein_coding;protein_coding;protein_coding;protein_coding;protein_coding;protein_coding;protein_coding;protein_coding;protein_coding;protein_coding	2;2;2;2;2;2;2;2;2;2;2;2;2;2	35;35;35;35;36;36;37;37;35;35;35;35;34;34	CEP290-207;CEP290-207;CEP290-213;CEP290-213;CEP290-225;CEP290-225;CEP290-221;CEP290-221;CEP290-201;CEP290-201;CEP290-220;CEP290-220;CEP290-218;CEP290-218	1;1;None;None;None;None;None;None;5;5;None;None;None;None
12	89012098	exon	89010701	89013317	-	LINC02458	ENSG00000246363.3	lncRNA	2	7	LINC02458-202	4
12	89523405	CDS;CDS;exon;exon;three_prime_UTR;exon	89522813;89522813;89519408;89521934;89521934;89519412	89524440;89524549;89524440;89523673;89523644;89524796	-;-;-;-;-;-	POC1B-GALNT4;GALNT4;POC1B-GALNT4;POC1B-GALNT4;POC1B-GALNT4;GALNT4	ENSG00000259075.6;ENSG00000257594.4;ENSG00000259075.6;ENSG00000259075.6;ENSG00000259075.6;ENSG00000257594.4	protein_coding;protein_coding;protein_coding;protein_coding;protein_coding;protein_coding	2;2;2;2;2;2	3;1;3;3;3;1	POC1B-GALNT4-202;GALNT4-201;POC1B-GALNT4-202;POC1B-GALNT4-201;POC1B-GALNT4-201;GALNT4-201	2;NA;2;2;2;NA
12	89525564	exon;five_prime_UTR	89525120;89525120	89525615;89525615	-;-	POC1B;POC1B	ENSG00000139323.14;ENSG00000139323.14	protein_coding;protein_coding	2;2	1;1	POC1B-202;POC1B-202	1;1
12	89543845	exon	89540108	89548005	+	POC1B-AS1	ENSG00000270344.3	lncRNA	2	3	POC1B-AS1-201	2
12	90682123	exon	90679635	90684224	+	LINC02822	ENSG00000286021.2	lncRNA	2	5	LINC02822-202	None
12	90869919	exon	90869809	90869957	+	LINC02822	ENSG00000286021.2	lncRNA	2	4	LINC02822-205	None
12	90888452	exon	90887690	90889917	+	LINC02822	ENSG00000286021.2	lncRNA	2	6	LINC02822-205	None
12	91103750	exon;three_prime_UTR	91102629;91102629	91104319;91104164	-;-	LUM;LUM	ENSG00000139329.5;ENSG00000139329.5	protein_coding;protein_coding	2;2	3;3	LUM-201;LUM-201	1;1
12	91108239	exon;CDS	91108118;91108118	91109000;91108979	-;-	LUM;LUM	ENSG00000139329.5;ENSG00000139329.5	protein_coding;protein_coding	2;2	2;2	LUM-201;LUM-201	1;1
12	92167525	exon	92167119	92167560	+	AC025164.1	ENSG00000245904.4	lncRNA	2	3	AC025164.1-201	5
12	93408116	exon;three_prime_UTR;exon;three_prime_UTR;exon;three_prime_UTR	93405684;93405684;93399177;93399380;93399177;93399380	93410079;93410038;93408146;93408146;93408146;93408146	-;-;+;+;+;+	UBE2N;UBE2N;NUDT4;NUDT4;NUDT4;NUDT4	ENSG00000177889.10;ENSG00000177889.10;ENSG00000173598.14;ENSG00000173598.14;ENSG00000173598.14;ENSG00000173598.14	protein_coding;protein_coding;protein_coding;protein_coding;protein_coding;protein_coding	2;2;2;2;2;2	4;4;5;5;5;5	UBE2N-201;UBE2N-201;NUDT4-201;NUDT4-201;NUDT4-202;NUDT4-202	1;1;1;1;1;1
12	93410997	exon;CDS	93408371;93410871	93411299;93411299	-;-	UBE2N;UBE2N	ENSG00000177889.10;ENSG00000177889.10	protein_coding;protein_coding	2;2	2;2	UBE2N-205;UBE2N-205	2;2
12	93411018	exon;CDS	93408371;93410871	93411299;93411299	-;-	UBE2N;UBE2N	ENSG00000177889.10;ENSG00000177889.10	protein_coding;protein_coding	2;2	2;2	UBE2N-205;UBE2N-205	2;2
12	93501196	CDS;CDS;exon;CDS;exon;exon	93501176;93501176;93501185;93501185;93501176;93501176	93501221;93501221;93502652;93501221;93516213;93516214	+;+;+;+;+;+	MRPL42;MRPL42;MRPL42;MRPL42;MRPL42;MRPL42	ENSG00000198015.13;ENSG00000198015.13;ENSG00000198015.13;ENSG00000198015.13;ENSG00000198015.13;ENSG00000198015.13	protein_coding;protein_coding;protein_coding;protein_coding;protein_coding;protein_coding	2;2;1;1;2;2	6;6;6;6;6;6	MRPL42-206;MRPL42-208;MRPL42-202;MRPL42-202;MRPL42-206;MRPL42-208	1;2;3;3;1;2
12	93504013	exon;three_prime_UTR;exon;three_prime_UTR	93501176;93501222;93501176;93501222	93516213;93516213;93516214;93516214	+;+;+;+	MRPL42;MRPL42;MRPL42;MRPL42	ENSG00000198015.13;ENSG00000198015.13;ENSG00000198015.13;ENSG00000198015.13	protein_coding;protein_coding;protein_coding;protein_coding	2;2;2;2	6;6;6;6	MRPL42-206;MRPL42-206;MRPL42-208;MRPL42-208	1;1;2;2
12	93946311	exon	93945041	93947813	+	AC012464.3	ENSG00000271382.1	lncRNA	2	1	AC012464.3-201	NA
12	9420201	exon	9420189	9420255	-	DDX12P	ENSG00000214826.5	unprocessed_pseudogene	2	23	DDX12P-201	NA
12	95866292	exon;three_prime_UTR	95866005;95866072	95867053;95867053	+;+	SNRPF;SNRPF	ENSG00000139343.10;ENSG00000139343.10	protein_coding;protein_coding	2;2	4;4	SNRPF-201;SNRPF-201	1;1
12	96235544	exon;exon;exon	96235422;96235422;96235422	96235596;96235599;96235650	-;-;-	AC008149.2;AC008149.2;AC008149.2	ENSG00000287454.1;ENSG00000287454.1;ENSG00000287454.1	lncRNA;lncRNA;lncRNA	2;2;2	1;1;1	AC008149.2-201;AC008149.2-202;AC008149.2-203	None;None;None
12	96953550	exon;three_prime_UTR	96951949;96952054	96953780;96953780	+;+	NEDD1;NEDD1	ENSG00000139350.12;ENSG00000139350.12	protein_coding;protein_coding	2;2	16;16	NEDD1-201;NEDD1-201	2;2
12	9695574	exon;exon;three_prime_UTR	9695384;9694760;9694875	9696227;9699553;9699553	+;+;+	AC007068.1;CLEC2D;CLEC2D	ENSG00000213443.2;ENSG00000069493.15;ENSG00000069493.15	processed_pseudogene;protein_coding;protein_coding	2;2;2	1;5;5	AC007068.1-201;CLEC2D-203;CLEC2D-203	NA;1;1
12	97533560	exon	97532676	97533740	+	RMST	ENSG00000255794.9	lncRNA	2	9	RMST-215	None
12	98513277	exon	98512973	98515897	-	TMPO-AS1	ENSG00000257167.2	lncRNA	2	2	TMPO-AS1-202	1
12	98745399	exon;three_prime_UTR;exon;three_prime_UTR;exon;three_prime_UTR;exon;three_prime_UTR;exon;three_prime_UTR	98743974;98743974;98743974;98743974;98744216;98744216;98745351;98745351;98745400;98745400	98745849;98745738;98745846;98745738;98745849;98745738;98745846;98745738;98745846;98745738	-;-;-;-;-;-;-;-;-;-	ANKS1B;ANKS1B;ANKS1B;ANKS1B;ANKS1B;ANKS1B;ANKS1B;ANKS1B;ANKS1B;ANKS1B	ENSG00000185046.18;ENSG00000185046.18;ENSG00000185046.18;ENSG00000185046.18;ENSG00000185046.18;ENSG00000185046.18;ENSG00000185046.18;ENSG00000185046.18;ENSG00000185046.18;ENSG00000185046.18	protein_coding;protein_coding;protein_coding;protein_coding;protein_coding;protein_coding;protein_coding;protein_coding;protein_coding;protein_coding	2;2;2;2;2;2;1;1;2;2	12;12;12;12;13;13;12;12;11;11	ANKS1B-220;ANKS1B-220;ANKS1B-213;ANKS1B-213;ANKS1B-215;ANKS1B-215;ANKS1B-210;ANKS1B-210;ANKS1B-202;ANKS1B-202	1;1;1;1;1;1;2;2;2;2
12	98745399	exon;three_prime_UTR;exon;three_prime_UTR;exon;three_prime_UTR;exon;three_prime_UTR;exon;three_prime_UTR	98743974;98743974;98743974;98743974;98744216;98744216;98745351;98745351;98745400;98745400	98745849;98745738;98745846;98745738;98745849;98745738;98745846;98745738;98745846;98745738	-;-;-;-;-;-;-;-;-;-	ANKS1B;ANKS1B;ANKS1B;ANKS1B;ANKS1B;ANKS1B;ANKS1B;ANKS1B;ANKS1B;ANKS1B	ENSG00000185046.18;ENSG00000185046.18;ENSG00000185046.18;ENSG00000185046.18;ENSG00000185046.18;ENSG00000185046.18;ENSG00000185046.18;ENSG00000185046.18;ENSG00000185046.18;ENSG00000185046.18	protein_coding;protein_coding;protein_coding;protein_coding;protein_coding;protein_coding;protein_coding;protein_coding;protein_coding;protein_coding	2;2;2;2;2;2;1;1;2;2	12;12;12;12;13;13;12;12;11;11	ANKS1B-220;ANKS1B-220;ANKS1B-213;ANKS1B-213;ANKS1B-215;ANKS1B-215;ANKS1B-210;ANKS1B-210;ANKS1B-202;ANKS1B-202	1;1;1;1;1;1;2;2;2;2
12	9980622	exon;CDS;exon;CDS;exon;CDS;exon;CDS	9980582;9980582;9980582;9980582;9980582;9980582;9980582;9980582	9980733;9980733;9980733;9980733;9980733;9980733;9980733;9980733	+;+;+;+;+;+;+;+	CLEC12A;CLEC12A;CLEC12A;CLEC12A;CLEC12A;CLEC12A;CLEC12A;CLEC12A	ENSG00000172322.14;ENSG00000172322.14;ENSG00000172322.14;ENSG00000172322.14;ENSG00000172322.14;ENSG00000172322.14;ENSG00000172322.14;ENSG00000172322.14	protein_coding;protein_coding;protein_coding;protein_coding;protein_coding;protein_coding;protein_coding;protein_coding	2;2;2;2;2;2;2;2	5;5;4;4;4;4;3;3	CLEC12A-203;CLEC12A-203;CLEC12A-201;CLEC12A-201;CLEC12A-205;CLEC12A-205;CLEC12A-202;CLEC12A-202	1;1;1;1;1;1;1;1
13	102593824	exon	102593338	102593873	-	AL158063.1	ENSG00000276957.1	lncRNA	2	1	AL158063.1-201	NA
13	102746503	exon;CDS	102729367;102729451	102750388;102750388	-;-	CCDC168;CCDC168	ENSG00000175820.4;ENSG00000175820.4	protein_coding;protein_coding	2;2	4;4	CCDC168-201;CCDC168-201	3;3
13	103045770	exon;three_prime_UTR	103043998;103043998	103046260;103046132	-;-	SLC10A2;SLC10A2	ENSG00000125255.7;ENSG00000125255.7	protein_coding;protein_coding	2;2	6;6	SLC10A2-201;SLC10A2-201	1;1
13	106493458	exon	106493295	106495130	+	AL138689.2	ENSG00000284966.3	lncRNA	2	4	AL138689.2-201	None
13	106621644	exon	106621276	106622254	+	LINC00551	ENSG00000272274.2	lncRNA	2	4	LINC00551-205	None
13	106753395	exon	106753247	106754045	+	AL163534.1	ENSG00000287546.1	lncRNA	2	1	AL163534.1-201	None
13	108230599	exon;three_prime_UTR	108229199;108230233	108234243;108234243	+;+	ABHD13;ABHD13	ENSG00000139826.6;ENSG00000139826.6	protein_coding;protein_coding	2;2	2;2	ABHD13-201;ABHD13-201	1;1
13	108365723	exon	108365671	108365795	+	AL138694.1	ENSG00000283384.1	lncRNA	2	3	AL138694.1-201	5
13	108964862	exon;CDS;exon;CDS;exon;CDS	108964761;108964761;108964761;108964761;108964761;108964761	108964902;108964902;108964902;108964902;108964902;108964902	+;+;+;+;+;+	MYO16;MYO16;MYO16;MYO16;MYO16;MYO16	ENSG00000041515.16;ENSG00000041515.16;ENSG00000041515.16;ENSG00000041515.16;ENSG00000041515.16;ENSG00000041515.16	protein_coding;protein_coding;protein_coding;protein_coding;protein_coding;protein_coding	2;2;2;2;2;2	20;20;20;20;20;20	MYO16-202;MYO16-202;MYO16-201;MYO16-201;MYO16-204;MYO16-204	1;1;5;5;1;1
13	110358125	exon;three_prime_UTR	110357472;110357613	110362215;110362215	+;+	COL4A2;COL4A2	ENSG00000134871.19;ENSG00000134871.19	protein_coding;protein_coding	2;2	4;4	COL4A2-213;COL4A2-213	None;None
13	110638820	exon;three_prime_UTR;exon;three_prime_UTR	110638378;110638529;110638242;110638522	110639993;110639993;110639993;110639993	+;+;+;+	NAXD;NAXD;NAXD;NAXD	ENSG00000213995.11;ENSG00000213995.11;ENSG00000213995.11;ENSG00000213995.11	protein_coding;protein_coding;protein_coding;protein_coding	3;3;2;2	7;7;10;10	NAXD-202;NAXD-202;NAXD-201;NAXD-201	2;2;2;2
13	110714085	exon;five_prime_UTR	110713700;110713700	110714285;110714149	+;+	ING1;ING1	ENSG00000153487.13;ENSG00000153487.13	protein_coding;protein_coding	2;2	1;1	ING1-201;ING1-201	1;1
13	111293454	exon;three_prime_UTR;exon;three_prime_UTR;exon;three_prime_UTR	111292118;111292333;111292118;111292333;111292118;111292333	111295195;111295195;111295195;111295195;111295192;111295192	+;+;+;+;+;+	ARHGEF7;ARHGEF7;ARHGEF7;ARHGEF7;ARHGEF7;ARHGEF7	ENSG00000102606.18;ENSG00000102606.18;ENSG00000102606.18;ENSG00000102606.18;ENSG00000102606.18;ENSG00000102606.18	protein_coding;protein_coding;protein_coding;protein_coding;protein_coding;protein_coding	3;3;3;3;2;2	18;18;20;20;17;17	ARHGEF7-205;ARHGEF7-205;ARHGEF7-206;ARHGEF7-206;ARHGEF7-203;ARHGEF7-203	1;1;1;1;5;5
13	111305117	exon;three_prime_UTR;exon;three_prime_UTR;exon;three_prime_UTR;exon;three_prime_UTR	111302991;111303114;111302991;111303114;111302991;111303114;111302991;111303114	111305727;111305727;111305731;111305731;111305731;111305731;111305737;111305737	+;+;+;+;+;+;+;+	ARHGEF7;ARHGEF7;ARHGEF7;ARHGEF7;ARHGEF7;ARHGEF7;ARHGEF7;ARHGEF7	ENSG00000102606.18;ENSG00000102606.18;ENSG00000102606.18;ENSG00000102606.18;ENSG00000102606.18;ENSG00000102606.18;ENSG00000102606.18;ENSG00000102606.18	protein_coding;protein_coding;protein_coding;protein_coding;protein_coding;protein_coding;protein_coding;protein_coding	2;2;2;2;2;2;2;2	22;22;21;21;20;20;20;20	ARHGEF7-220;ARHGEF7-220;ARHGEF7-201;ARHGEF7-201;ARHGEF7-204;ARHGEF7-204;ARHGEF7-208;ARHGEF7-208	None;None;5;5;1;1;1;1
13	112745768	exon	112745449	112747440	-	ATP11A-AS1	ENSG00000232684.1	lncRNA	1	2	ATP11A-AS1-201	1
13	113407566	exon;CDS	113399610;113403378	113408220;113408220	-;-	ADPRHL1;ADPRHL1	ENSG00000153531.13;ENSG00000153531.13	protein_coding;protein_coding	2;2	8;8	ADPRHL1-204;ADPRHL1-204	5;5
13	113461132	exon;CDS;exon;CDS	113461054;113461054;113461054;113461054	113461136;113461136;113461136;113461136	-;-;-;-	DCUN1D2;DCUN1D2;DCUN1D2;DCUN1D2	ENSG00000150401.15;ENSG00000150401.15;ENSG00000150401.15;ENSG00000150401.15	protein_coding;protein_coding;protein_coding;protein_coding	2;2;2;2	3;3;5;5	DCUN1D2-201;DCUN1D2-201;DCUN1D2-208;DCUN1D2-208	2;2;1;1
13	113816315	exon;three_prime_UTR	113811736;113811904	113816995;113816995	+;+	TMEM255B;TMEM255B	ENSG00000184497.13;ENSG00000184497.13	protein_coding;protein_coding	2;2	9;9	TMEM255B-202;TMEM255B-202	1;1
13	113978014	exon;three_prime_UTR	113977783;113977783	113979422;113979346	-;-	RASA3;RASA3	ENSG00000185989.11;ENSG00000185989.11	protein_coding;protein_coding	2;2	24;24	RASA3-201;RASA3-201	1;1
13	18492384	exon	18491904	18492419	+	BNIP3P7	ENSG00000270496.1	processed_pseudogene	1	1	BNIP3P7-201	NA
13	19290692	exon	19290593	19290750	-	ANKRD26P3	ENSG00000237636.3	unprocessed_pseudogene	1	15	ANKRD26P3-203	NA
13	19672517	exon;three_prime_UTR	19671834;19671876	19673441;19673441	+;+	MPHOSPH8;MPHOSPH8	ENSG00000196199.14;ENSG00000196199.14	protein_coding;protein_coding	2;2	14;14	MPHOSPH8-201;MPHOSPH8-201	1;1
13	21312771	exon	21312452	21313412	-	LINC00539	ENSG00000224429.8	lncRNA	2	1	LINC00539-213	None
13	21320641	exon	21319156	21320866	+	GRK6P1	ENSG00000215571.5	processed_pseudogene	1	1	GRK6P1-201	NA
13	21374109	exon;three_prime_UTR;exon;three_prime_UTR;exon;three_prime_UTR	21372571;21372571;21372573;21372573;21372573;21372573	21376655;21376655;21376655;21376647;21376655;21376647	-;-;-;-;-;-	ZDHHC20;ZDHHC20;ZDHHC20;ZDHHC20;ZDHHC20;ZDHHC20	ENSG00000180776.16;ENSG00000180776.16;ENSG00000180776.16;ENSG00000180776.16;ENSG00000180776.16;ENSG00000180776.16	protein_coding;protein_coding;protein_coding;protein_coding;protein_coding;protein_coding	2;2;3;3;3;3	13;13;12;12;11;11	ZDHHC20-203;ZDHHC20-203;ZDHHC20-202;ZDHHC20-202;ZDHHC20-209;ZDHHC20-209	5;5;1;1;2;2
13	23941318	exon;exon	23941290;23941290	23941469;23941469	-;-	ANKRD20A19P;ANKRD20A19P	ENSG00000196593.9;ENSG00000196593.9	transcribed_unprocessed_pseudogene;transcribed_unprocessed_pseudogene	2;2	3;2	ANKRD20A19P-202;ANKRD20A19P-203	2;NA
13	24751781	exon;exon	24751563;24750657	24752826;24752171	+;-	AL391560.2;ANKRD20A10P	ENSG00000287887.1;ENSG00000226695.1	lncRNA;processed_pseudogene	2;1	3;1	AL391560.2-201;ANKRD20A10P-201	None;NA
13	24906744	exon;CDS;exon;CDS;exon;CDS	24905346;24905346;24905346;24905346;24905346;24905346	24906960;24906960;24906960;24906960;24906960;24906960	-;-;-;-;-;-	CENPJ;CENPJ;CENPJ;CENPJ;CENPJ;CENPJ	ENSG00000151849.15;ENSG00000151849.15;ENSG00000151849.15;ENSG00000151849.15;ENSG00000151849.15;ENSG00000151849.15	protein_coding;protein_coding;protein_coding;protein_coding;protein_coding;protein_coding	2;2;3;3;3;3	7;7;7;7;7;7	CENPJ-201;CENPJ-201;CENPJ-206;CENPJ-206;CENPJ-205;CENPJ-205	1;1;1;1;2;2
13	25248767	exon;three_prime_UTR	25246201;25246201	25249492;25249231	-;-	MTMR6;MTMR6	ENSG00000139505.11;ENSG00000139505.11	protein_coding;protein_coding	2;2	14;14	MTMR6-201;MTMR6-201	1;1
13	26686889	exon;three_prime_UTR;exon;three_prime_UTR;exon	26685688;26685846;26685688;26685846;26685640	26688948;26688948;26688943;26688943;26687663	+;+;+;+;-	WASF3;WASF3;WASF3;WASF3;AL159978.1	ENSG00000132970.14;ENSG00000132970.14;ENSG00000132970.14;ENSG00000132970.14;ENSG00000285935.1	protein_coding;protein_coding;protein_coding;protein_coding;lncRNA	2;2;3;3;2	10;10;10;10;2	WASF3-201;WASF3-201;WASF3-202;WASF3-202;AL159978.1-201	1;1;1;1;None
13	27105863	exon;CDS	27105731;27105731	27105944;27105944	-;-	USP12;USP12	ENSG00000152484.14;ENSG00000152484.14	protein_coding;protein_coding	2;2	3;3	USP12-201;USP12-201	1;1
13	27273690	exon;three_prime_UTR	27273027;27273495	27275192;27275192	+;+	RASL11A;RASL11A	ENSG00000122035.7;ENSG00000122035.7	protein_coding;protein_coding	2;2	4;4	RASL11A-201;RASL11A-201	1;1
13	28215276	exon	28214513	28215897	+	EEF1A1P3	ENSG00000232587.1	processed_pseudogene	1	1	EEF1A1P3-201	NA
13	28293424	exon;three_prime_UTR;exon;three_prime_UTR	28292382;28292523;28292382;28292523	28295335;28295335;28295335;28295335	+;+;+;+	PAN3;PAN3;PAN3;PAN3	ENSG00000152520.14;ENSG00000152520.14;ENSG00000152520.14;ENSG00000152520.14	protein_coding;protein_coding;protein_coding;protein_coding	2;2;2;2	19;19;18;18	PAN3-201;PAN3-201;PAN3-202;PAN3-202	5;5;5;5
13	28294956	exon;three_prime_UTR;exon;three_prime_UTR	28292382;28292523;28292382;28292523	28295335;28295335;28295335;28295335	+;+;+;+	PAN3;PAN3;PAN3;PAN3	ENSG00000152520.14;ENSG00000152520.14;ENSG00000152520.14;ENSG00000152520.14	protein_coding;protein_coding;protein_coding;protein_coding	2;2;2;2	19;19;18;18	PAN3-201;PAN3-201;PAN3-202;PAN3-202	5;5;5;5
13	28387823	exon;three_prime_UTR;exon;three_prime_UTR	28385548;28385548;28385567;28385567	28390104;28389700;28389632;28389603	-;-;-;-	FLT1;FLT1;FLT1;FLT1	ENSG00000102755.12;ENSG00000102755.12;ENSG00000102755.12;ENSG00000102755.12	protein_coding;protein_coding;protein_coding;protein_coding	2;2;2;2	13;13;14;14	FLT1-207;FLT1-207;FLT1-209;FLT1-209	1;1;5;5
13	28387823	exon;three_prime_UTR;exon;three_prime_UTR	28385548;28385548;28385567;28385567	28390104;28389700;28389632;28389603	-;-;-;-	FLT1;FLT1;FLT1;FLT1	ENSG00000102755.12;ENSG00000102755.12;ENSG00000102755.12;ENSG00000102755.12	protein_coding;protein_coding;protein_coding;protein_coding	2;2;2;2	13;13;14;14	FLT1-207;FLT1-207;FLT1-209;FLT1-209	1;1;5;5
13	30202757	exon;three_prime_UTR	30202630;30202630	30208738;30208539	-;-	KATNAL1;KATNAL1	ENSG00000102781.14;ENSG00000102781.14	protein_coding;protein_coding	2;2	11;11	KATNAL1-201;KATNAL1-201	1;1
13	30203931	exon;three_prime_UTR	30202630;30202630	30208738;30208539	-;-	KATNAL1;KATNAL1	ENSG00000102781.14;ENSG00000102781.14	protein_coding;protein_coding	2;2	11;11	KATNAL1-201;KATNAL1-201	1;1
13	30899975	exon	30899914	30899986	-	TEX26-AS1	ENSG00000224743.7	lncRNA	2	3	TEX26-AS1-216	5
13	32326612	exon;CDS;exon;CDS	32326499;32326499;32326499;32326499	32326613;32326613;32326613;32326613	+;+;+;+	BRCA2;BRCA2;BRCA2;BRCA2	ENSG00000139618.16;ENSG00000139618.16;ENSG00000139618.16;ENSG00000139618.16	protein_coding;protein_coding;protein_coding;protein_coding	3;3;2;2	7;7;7;7	BRCA2-206;BRCA2-206;BRCA2-201;BRCA2-201	1;1;5;5
13	32444013	exon;CDS;exon;CDS;exon;CDS;exon;CDS	32442388;32442388;32442388;32442388;32442388;32442388;32442388;32442388	32444126;32444126;32444126;32444126;32444126;32444126;32444126;32444126	-;-;-;-;-;-;-;-	N4BP2L2;N4BP2L2;N4BP2L2;N4BP2L2;N4BP2L2;N4BP2L2;N4BP2L2;N4BP2L2	ENSG00000244754.9;ENSG00000244754.9;ENSG00000244754.9;ENSG00000244754.9;ENSG00000244754.9;ENSG00000244754.9;ENSG00000244754.9;ENSG00000244754.9	protein_coding;protein_coding;protein_coding;protein_coding;protein_coding;protein_coding;protein_coding;protein_coding	3;3;3;3;2;2;2;2	7;7;7;7;6;6;2;2	N4BP2L2-202;N4BP2L2-202;N4BP2L2-204;N4BP2L2-204;N4BP2L2-211;N4BP2L2-211;N4BP2L2-240;N4BP2L2-240	2;2;5;5;5;5;None;None
13	32506941	exon	32504506	32509395	-	N4BP2L2-IT2	ENSG00000281026.1	lncRNA	2	1	N4BP2L2-IT2-201	NA
13	32508751	exon	32504506	32509395	-	N4BP2L2-IT2	ENSG00000281026.1	lncRNA	2	1	N4BP2L2-IT2-201	NA
13	32514223	exon;three_prime_UTR;exon;three_prime_UTR	32510292;32510292;32514020;32514020	32518003;32517801;32518003;32517801	-;-;-;-	N4BP2L2;N4BP2L2;N4BP2L2;N4BP2L2	ENSG00000244754.9;ENSG00000244754.9;ENSG00000244754.9;ENSG00000244754.9	protein_coding;protein_coding;protein_coding;protein_coding	2;2;2;2	6;6;7;7	N4BP2L2-201;N4BP2L2-201;N4BP2L2-228;N4BP2L2-228	1;1;None;None
13	32775112	exon;three_prime_UTR	32775017;32775053	32778019;32778019	+;+	PDS5B;PDS5B	ENSG00000083642.19;ENSG00000083642.19	protein_coding;protein_coding	2;2	35;35	PDS5B-201;PDS5B-201	1;1
13	33847657	exon	33846190	33850825	+	AL161891.1	ENSG00000276672.1	lncRNA	2	1	AL161891.1-201	NA
13	33848896	exon	33846190	33850825	+	AL161891.1	ENSG00000276672.1	lncRNA	2	1	AL161891.1-201	NA
13	36304119	exon;three_prime_UTR;exon;three_prime_UTR;exon;three_prime_UTR;exon;three_prime_UTR;exon;three_prime_UTR	36301638;36301638;36301640;36301640;36301640;36301640;36301652;36301652;36303602;36303602	36304632;36304364;36304632;36304364;36304632;36304364;36304632;36304364;36304632;36304364	-;-;-;-;-;-;-;-;-;-	SPART;SPART;SPART;SPART;SPART;SPART;SPART;SPART;SPART;SPART	ENSG00000133104.14;ENSG00000133104.14;ENSG00000133104.14;ENSG00000133104.14;ENSG00000133104.14;ENSG00000133104.14;ENSG00000133104.14;ENSG00000133104.14;ENSG00000133104.14;ENSG00000133104.14	protein_coding;protein_coding;protein_coding;protein_coding;protein_coding;protein_coding;protein_coding;protein_coding;protein_coding;protein_coding	2;2;3;3;3;3;2;2;2;2	9;9;9;9;9;9;10;10;10;10	SPART-202;SPART-202;SPART-203;SPART-203;SPART-201;SPART-201;SPART-212;SPART-212;SPART-209;SPART-209	1;1;1;1;5;5;None;None;1;1
13	37632320	exon;three_prime_UTR	37632063;37632063	37637625;37636902	-;-	TRPC4;TRPC4	ENSG00000133107.15;ENSG00000133107.15	protein_coding;protein_coding	2;2	11;11	TRPC4-206;TRPC4-206	1;1
13	37993308	exon	37993085	37994720	-	HSPD1P9	ENSG00000228036.1	processed_pseudogene	1	1	HSPD1P9-201	NA
13	38885260	exon;three_prime_UTR	38880284;38880788	38887131;38887131	+;+	FREM2;FREM2	ENSG00000150893.11;ENSG00000150893.11	protein_coding;protein_coding	2;2	24;24	FREM2-201;FREM2-201	1;1
13	39752085	exon;three_prime_UTR	39750946;39751094	39752628;39752628	+;+	COG6;COG6	ENSG00000133103.17;ENSG00000133103.17	protein_coding;protein_coding	2;2	19;19	COG6-204;COG6-204	1;1
13	40558469	exon;three_prime_UTR	40555667;40555667	40559034;40559034	-;-	FOXO1;FOXO1	ENSG00000150907.10;ENSG00000150907.10	protein_coding;protein_coding	2;2	3;3	FOXO1-201;FOXO1-201	1;1
13	40874924	exon	40874685	40875468	-	AL590064.1	ENSG00000287837.1	lncRNA	2	2	AL590064.1-201	None
13	40912155	exon	40911887	40912723	-	SUGT1P3	ENSG00000239827.8	transcribed_unprocessed_pseudogene	2	3	SUGT1P3-201	1
13	41926367	exon	41925598	41927349	+	KARS1P1	ENSG00000229696.1	processed_pseudogene	1	1	KARS1P1-201	NA
13	42234260	exon;three_prime_UTR;exon;three_prime_UTR	42229099;42229189;42229099;42229152	42242896;42242896;42242896;42242896	+;+;+;+	DGKH;DGKH;DGKH;DGKH	ENSG00000102780.17;ENSG00000102780.17;ENSG00000102780.17;ENSG00000102780.17	protein_coding;protein_coding;protein_coding;protein_coding	2;2;2;2	30;30;29;29	DGKH-202;DGKH-202;DGKH-201;DGKH-201	1;1;1;1
13	42321604	exon;three_prime_UTR	42319088;42319229	42323261;42323261	+;+	AKAP11;AKAP11	ENSG00000023516.9;ENSG00000023516.9	protein_coding;protein_coding	2;2	13;13	AKAP11-201;AKAP11-201	1;1
13	42969172	exon;CDS;exon;CDS;exon;CDS	42969094;42969094;42969094;42969094;42969094;42969094	42969177;42969177;42969177;42969177;42969177;42969177	-;-;-;-;-;-	EPSTI1;EPSTI1;EPSTI1;EPSTI1;EPSTI1;EPSTI1	ENSG00000133106.14;ENSG00000133106.14;ENSG00000133106.14;ENSG00000133106.14;ENSG00000133106.14;ENSG00000133106.14	protein_coding;protein_coding;protein_coding;protein_coding;protein_coding;protein_coding	2;2;2;2;2;2	3;3;3;3;3;3	EPSTI1-202;EPSTI1-202;EPSTI1-201;EPSTI1-201;EPSTI1-203;EPSTI1-203	1;1;1;1;5;5
13	43110508	exon;three_prime_UTR	43107178;43107249	43114213;43114213	+;+	DNAJC15;DNAJC15	ENSG00000120675.6;ENSG00000120675.6	protein_coding;protein_coding	2;2	6;6	DNAJC15-201;DNAJC15-201	1;1
13	43113483	exon;three_prime_UTR	43107178;43107249	43114213;43114213	+;+	DNAJC15;DNAJC15	ENSG00000120675.6;ENSG00000120675.6	protein_coding;protein_coding	2;2	6;6	DNAJC15-201;DNAJC15-201	1;1
13	43837164	exon;three_prime_UTR	43836352;43836352	43837429;43837279	-;-	CCDC122;CCDC122	ENSG00000151773.13;ENSG00000151773.13	protein_coding;protein_coding	2;2	7;7	CCDC122-201;CCDC122-201	5;5
13	43837177	exon;three_prime_UTR	43836352;43836352	43837429;43837279	-;-	CCDC122;CCDC122	ENSG00000151773.13;ENSG00000151773.13	protein_coding;protein_coding	2;2	7;7	CCDC122-201;CCDC122-201	5;5
13	43968601	exon	43968424	43971199	+	DGKZP1	ENSG00000179611.3	processed_pseudogene	1	1	DGKZP1-201	NA
13	44579871	exon	44578102	44580432	+	TSC22D1-AS1	ENSG00000278156.2	lncRNA	2	3	TSC22D1-AS1-201	1
13	45028074	exon;three_prime_UTR;exon;three_prime_UTR	45027785;45028004;45027785;45028004	45030305;45030305;45030305;45030305	+;+;+;+	GPALPP1;GPALPP1;GPALPP1;GPALPP1	ENSG00000133114.18;ENSG00000133114.18;ENSG00000133114.18;ENSG00000133114.18	protein_coding;protein_coding;protein_coding;protein_coding	2;2;2;2	8;8;8;8	GPALPP1-203;GPALPP1-203;GPALPP1-202;GPALPP1-202	1;1;5;5
13	45029809	exon;three_prime_UTR;exon;three_prime_UTR	45027785;45028004;45027785;45028004	45030305;45030305;45030305;45030305	+;+;+;+	GPALPP1;GPALPP1;GPALPP1;GPALPP1	ENSG00000133114.18;ENSG00000133114.18;ENSG00000133114.18;ENSG00000133114.18	protein_coding;protein_coding;protein_coding;protein_coding	2;2;2;2	8;8;8;8	GPALPP1-203;GPALPP1-203;GPALPP1-202;GPALPP1-202	1;1;5;5
13	45393602	exon;three_prime_UTR;exon;three_prime_UTR	45393316;45393316;45393334;45393334	45396015;45395973;45396015;45395973	-;-;-;-	SLC25A30;SLC25A30;SLC25A30;SLC25A30	ENSG00000174032.17;ENSG00000174032.17;ENSG00000174032.17;ENSG00000174032.17	protein_coding;protein_coding;protein_coding;protein_coding	2;2;3;3	10;10;9;9	SLC25A30-204;SLC25A30-204;SLC25A30-207;SLC25A30-207	1;1;2;2
13	45394262	exon;three_prime_UTR;exon;three_prime_UTR	45393316;45393316;45393334;45393334	45396015;45395973;45396015;45395973	-;-;-;-	SLC25A30;SLC25A30;SLC25A30;SLC25A30	ENSG00000174032.17;ENSG00000174032.17;ENSG00000174032.17;ENSG00000174032.17	protein_coding;protein_coding;protein_coding;protein_coding	2;2;3;3	10;10;9;9	SLC25A30-204;SLC25A30-204;SLC25A30-207;SLC25A30-207	1;1;2;2
13	45394262	exon;three_prime_UTR;exon;three_prime_UTR	45393316;45393316;45393334;45393334	45396015;45395973;45396015;45395973	-;-;-;-	SLC25A30;SLC25A30;SLC25A30;SLC25A30	ENSG00000174032.17;ENSG00000174032.17;ENSG00000174032.17;ENSG00000174032.17	protein_coding;protein_coding;protein_coding;protein_coding	2;2;3;3	10;10;9;9	SLC25A30-204;SLC25A30-204;SLC25A30-207;SLC25A30-207	1;1;2;2
13	45963439	exon;three_prime_UTR	45962176;45962176	45964042;45963821	-;-	ZC3H13;ZC3H13	ENSG00000123200.16;ENSG00000123200.16	protein_coding;protein_coding	2;2	17;17	ZC3H13-202;ZC3H13-202	1;1
13	46335713	exon;three_prime_UTR	46334681;46334681	46343497;46343384	-;-	RUBCNL;RUBCNL	ENSG00000102445.19;ENSG00000102445.19	protein_coding;protein_coding	2;2	17;17	RUBCNL-221;RUBCNL-221	None;None
13	46335853	exon;three_prime_UTR	46334681;46334681	46343497;46343384	-;-	RUBCNL;RUBCNL	ENSG00000102445.19;ENSG00000102445.19	protein_coding;protein_coding	2;2	17;17	RUBCNL-221;RUBCNL-221	None;None
13	46458476	exon	46458061	46459185	-	AL138686.2	ENSG00000285576.1	transcribed_unprocessed_pseudogene	2	1	AL138686.2-201	NA
13	46458505	exon	46458061	46459185	-	AL138686.2	ENSG00000285576.1	transcribed_unprocessed_pseudogene	2	1	AL138686.2-201	NA
13	46458622	exon	46458061	46459185	-	AL138686.2	ENSG00000285576.1	transcribed_unprocessed_pseudogene	2	1	AL138686.2-201	NA
13	46743108	exon;three_prime_UTR;exon;three_prime_UTR	46741642;46741849;46741642;46741849	46744898;46744898;46743595;46743595	+;+;+;+	LRCH1;LRCH1;LRCH1;LRCH1	ENSG00000136141.15;ENSG00000136141.15;ENSG00000136141.15;ENSG00000136141.15	protein_coding;protein_coding;protein_coding;protein_coding	1;1;2;2	20;20;19;19	LRCH1-202;LRCH1-202;LRCH1-203;LRCH1-203	1;1;1;1
13	47932298	exon	47930153	47932622	-	LINC00562	ENSG00000260388.2	lncRNA	2	1	LINC00562-201	NA
13	48512782	exon;CDS;exon;CDS;exon;CDS	48512729;48512729;48512729;48512729;48512729;48512729	48512895;48512895;48512895;48512895;48512895;48512895	-;-;-;-;-;-	RCBTB2;RCBTB2;RCBTB2;RCBTB2;RCBTB2;RCBTB2	ENSG00000136161.12;ENSG00000136161.12;ENSG00000136161.12;ENSG00000136161.12;ENSG00000136161.12;ENSG00000136161.12	protein_coding;protein_coding;protein_coding;protein_coding;protein_coding;protein_coding	2;2;3;3;3;3	7;7;6;6;4;4	RCBTB2-201;RCBTB2-201;RCBTB2-202;RCBTB2-202;RCBTB2-206;RCBTB2-206	1;1;2;2;1;1
13	49207631	exon;three_prime_UTR;exon;three_prime_UTR;exon;three_prime_UTR	49207081;49207396;49207081;49207396;49207081;49207396	49209779;49209779;49209778;49209778;49209593;49209593	+;+;+;+;+;+	FNDC3A;FNDC3A;FNDC3A;FNDC3A;FNDC3A;FNDC3A	ENSG00000102531.16;ENSG00000102531.16;ENSG00000102531.16;ENSG00000102531.16;ENSG00000102531.16;ENSG00000102531.16	protein_coding;protein_coding;protein_coding;protein_coding;protein_coding;protein_coding	2;2;3;3;2;2	26;26;26;26;24;24	FNDC3A-204;FNDC3A-204;FNDC3A-206;FNDC3A-206;FNDC3A-202;FNDC3A-202	1;1;1;1;1;1
13	49308942	exon;three_prime_UTR;exon;three_prime_UTR;exon;three_prime_UTR;exon;three_prime_UTR	49308650;49308650;49308650;49308650;49308655;49308655;49308655;49308655	49310993;49310813;49310993;49310813;49310993;49310813;49310993;49310813	-;-;-;-;-;-;-;-	CAB39L;CAB39L;CAB39L;CAB39L;CAB39L;CAB39L;CAB39L;CAB39L	ENSG00000102547.19;ENSG00000102547.19;ENSG00000102547.19;ENSG00000102547.19;ENSG00000102547.19;ENSG00000102547.19;ENSG00000102547.19;ENSG00000102547.19	protein_coding;protein_coding;protein_coding;protein_coding;protein_coding;protein_coding;protein_coding;protein_coding	2;2;2;2;3;3;3;3	9;9;11;11;12;12;10;10	CAB39L-202;CAB39L-202;CAB39L-205;CAB39L-205;CAB39L-212;CAB39L-212;CAB39L-201;CAB39L-201	1;1;1;1;5;5;5;5
13	49976824	exon	49976333	49979183	-	DLEU2	ENSG00000231607.12	lncRNA	2	1	DLEU2-215	None
13	49976902	exon	49976333	49979183	-	DLEU2	ENSG00000231607.12	lncRNA	2	1	DLEU2-215	None
13	50014313	exon;three_prime_UTR;exon;three_prime_UTR	50011935;50013165;50011935;50013165	50014331;50014331;50018467;50018467	+;+;+;+	TRIM13;TRIM13;TRIM13;TRIM13	ENSG00000204977.10;ENSG00000204977.10;ENSG00000204977.10;ENSG00000204977.10	protein_coding;protein_coding;protein_coding;protein_coding	2;2;2;2	3;3;2;2	TRIM13-204;TRIM13-204;TRIM13-202;TRIM13-202	1;1;1;1
13	50105925	exon	50104704	50107218	+	DLEU1	ENSG00000176124.15	lncRNA	2	3	DLEU1-212	1
13	50336333	exon	50336236	50336404	+	DLEU1	ENSG00000176124.15	lncRNA	2	4	DLEU1-216	5
13	50528523	exon;exon	50528180;50528180	50528534;50528643	+;+	DLEU1;DLEU1	ENSG00000176124.15;ENSG00000176124.15	lncRNA;lncRNA	2;2	8;7	DLEU1-233;DLEU1-210	5;5
13	50719624	exon	50719188	50719710	+	DLEU1	ENSG00000176124.15	lncRNA	2	1	DLEU1-242	None
13	50863995	exon	50862173	50865157	-	RNASEH2B-AS1	ENSG00000233672.9	lncRNA	2	5	RNASEH2B-AS1-212	None
13	50955801	exon;three_prime_UTR	50953905;50954034	50956503;50956503	+;+	RNASEH2B;RNASEH2B	ENSG00000136104.21;ENSG00000136104.21	protein_coding;protein_coding	2;2	10;10	RNASEH2B-208;RNASEH2B-208	3;3
13	50972631	exon;three_prime_UTR	50969932;50969965	50973745;50973745	+;+	RNASEH2B;RNASEH2B	ENSG00000136104.21;ENSG00000136104.21	protein_coding;protein_coding	2;2	10;10	RNASEH2B-202;RNASEH2B-202	5;5
13	51080844	exon	51080707	51080862	-	GUCY1B2	ENSG00000123201.14	transcribed_unitary_pseudogene	2	1	GUCY1B2-205	2
13	51283795	exon;three_prime_UTR	51280450;51281257	51284239;51284239	+;+	FAM124A;FAM124A	ENSG00000150510.17;ENSG00000150510.17	protein_coding;protein_coding	2;2	4;4	FAM124A-202;FAM124A-202	1;1
13	51447757	exon;three_prime_UTR	51436426;51436426	51451174;51451015	-;-	INTS6;INTS6	ENSG00000102786.15;ENSG00000102786.15	protein_coding;protein_coding	2;2	3;3	INTS6-203;INTS6-203	1;1
13	51588982	exon;three_prime_UTR	51586025;51586077	51592586;51592586	+;+	WDFY2;WDFY2	ENSG00000139668.9;ENSG00000139668.9	protein_coding;protein_coding	2;2	2;2	WDFY2-203;WDFY2-203	2;2
13	51765438	exon;three_prime_UTR;exon;three_prime_UTR	51759740;51759770;51763951;51763951	51767709;51767709;51767278;51767278	+;+;-;-	WDFY2;WDFY2;AL162377.3;AL162377.3	ENSG00000139668.9;ENSG00000139668.9;ENSG00000285444.1;ENSG00000285444.1	protein_coding;protein_coding;protein_coding;protein_coding	2;2;2;2	12;12;11;11	WDFY2-201;WDFY2-201;AL162377.3-201;AL162377.3-201	1;1;None;None
13	51769158	exon;CDS;exon;CDS	51767995;51769124;51769156;51769156	51769293;51769293;51769293;51769293	-;-;-;-	DHRS12;DHRS12;DHRS12;DHRS12	ENSG00000102796.11;ENSG00000102796.11;ENSG00000102796.11;ENSG00000102796.11	protein_coding;protein_coding;protein_coding;protein_coding	2;2;3;3	8;8;9;9	DHRS12-201;DHRS12-201;DHRS12-203;DHRS12-203	2;2;1;1
13	51813236	exon;CDS;exon	51813171;51813227;51813157	51813339;51813339;51813832	-;-;+	AL162377.3;AL162377.3;AL162377.1	ENSG00000285444.1;ENSG00000285444.1;ENSG00000231856.2	protein_coding;protein_coding;lncRNA	2;2;2	3;3;2	AL162377.3-201;AL162377.3-201;AL162377.1-202	None;None;2
13	52032746	exon;three_prime_UTR;exon;three_prime_UTR	52028319;52028591;52028319;52031106	52033600;52033600;52033600;52033600	+;+;+;+	ALG11;ALG11;UTP14C;UTP14C	ENSG00000253710.4;ENSG00000253710.4;ENSG00000253797.2;ENSG00000253797.2	protein_coding;protein_coding;protein_coding;protein_coding	2;2;2;2	4;4;2;2	ALG11-202;ALG11-202;UTP14C-201;UTP14C-201	1;1;1;1
13	52064933	exon;three_prime_UTR	52064756;52064756	52065609;52065406	-;-	NEK5;NEK5	ENSG00000197168.13;ENSG00000197168.13	protein_coding;protein_coding	2;2	22;22	NEK5-201;NEK5-201	1;1
13	52341369	exon;exon	52341293;52341293	52341896;52341427	+;+	LINC02333;LINC02333	ENSG00000271564.2;ENSG00000271564.2	lncRNA;lncRNA	2;2	3;3	LINC02333-201;LINC02333-203	3;None
13	52703748	exon;CDS;exon;CDS	52703264;52703595;52703264;52703595	52703807;52703807;52703810;52703810	-;-;-;-	CNMD;CNMD;CNMD;CNMD	ENSG00000136110.13;ENSG00000136110.13;ENSG00000136110.13;ENSG00000136110.13	protein_coding;protein_coding;protein_coding;protein_coding	2;2;2;2	7;7;7;7	CNMD-203;CNMD-203;CNMD-201;CNMD-201	1;1;1;1
13	53050821	exon;three_prime_UTR	53049969;53050772	53052057;53052057	+;+	OLFM4;OLFM4	ENSG00000102837.7;ENSG00000102837.7	protein_coding;protein_coding	2;2	5;5	OLFM4-201;OLFM4-201	1;1
13	56215653	exon	56215061	56216942	+	SPATA2P1	ENSG00000228319.1	processed_pseudogene	1	2	SPATA2P1-201	NA
13	63397357	exon;exon	63397011;63397228	63397522;63397522	+;+	AL359208.1;AL359208.1	ENSG00000287996.1;ENSG00000287996.1	lncRNA;lncRNA	2;2	1;1	AL359208.1-201;AL359208.1-203	None;None
13	63742786	exon	63742341	63742804	+	OR7E156P	ENSG00000274052.2	transcribed_unprocessed_pseudogene	2	1	OR7E156P-201	NA
13	67207552	exon;three_prime_UTR	67201015;67201015	67228575;67225341	-;-	PCDH9;PCDH9	ENSG00000184226.15;ENSG00000184226.15	protein_coding;protein_coding	2;2	2;2	PCDH9-201;PCDH9-201	1;1
13	72754709	exon;three_prime_UTR	72752169;72752169	72759878;72759794	-;-	DIS3;DIS3	ENSG00000083520.15;ENSG00000083520.15	protein_coding;protein_coding	2;2	21;21	DIS3-201;DIS3-201	1;1
13	72965354	exon;CDS;exon;CDS;exon;CDS	72965274;72965274;72965274;72965274;72965274;72965274	72965404;72965404;72965404;72965404;72965404;72965404	+;+;+;+;+;+	PIBF1;PIBF1;PIBF1;PIBF1;PIBF1;PIBF1	ENSG00000083535.16;ENSG00000083535.16;ENSG00000083535.16;ENSG00000083535.16;ENSG00000083535.16;ENSG00000083535.16	protein_coding;protein_coding;protein_coding;protein_coding;protein_coding;protein_coding	2;2;2;2;3;3	15;15;15;15;6;6	PIBF1-201;PIBF1-201;PIBF1-208;PIBF1-208;PIBF1-207;PIBF1-207	1;1;1;1;1;1
13	72973680	exon;CDS	72973591;72973591	72974251;72973723	+;+	PIBF1;PIBF1	ENSG00000083535.16;ENSG00000083535.16	protein_coding;protein_coding	2;2	16;16	PIBF1-208;PIBF1-208	1;1
13	73801727	exon	73800074	73802203	+	AL138713.1	ENSG00000280348.1	TEC	2	1	AL138713.1-201	NA
13	75359779	exon;CDS;exon;CDS;exon;CDS;exon;CDS	75359769;75359769;75359769;75359769;75359769;75359769;75359769;75359769	75359858;75359858;75359858;75359858;75359858;75359858;75359858;75359858	-;-;-;-;-;-;-;-	TBC1D4;TBC1D4;TBC1D4;TBC1D4;TBC1D4;TBC1D4;TBC1D4;TBC1D4	ENSG00000136111.14;ENSG00000136111.14;ENSG00000136111.14;ENSG00000136111.14;ENSG00000136111.14;ENSG00000136111.14;ENSG00000136111.14;ENSG00000136111.14	protein_coding;protein_coding;protein_coding;protein_coding;protein_coding;protein_coding;protein_coding;protein_coding	2;2;2;2;3;3;3;3	4;4;3;3;3;3;3;3	TBC1D4-208;TBC1D4-208;TBC1D4-202;TBC1D4-202;TBC1D4-201;TBC1D4-201;TBC1D4-204;TBC1D4-204	None;None;2;2;1;1;1;1
13	76883285	exon;three_prime_UTR	76880175;76880175	76886405;76885170	-;-	KCTD12;KCTD12	ENSG00000178695.6;ENSG00000178695.6	protein_coding;protein_coding	2;2	1;1	KCTD12-201;KCTD12-201	NA;NA
13	77005350	exon;three_prime_UTR	77005260;77005260	77007788;77007144	-;-	FBXL3;FBXL3	ENSG00000005812.11;ENSG00000005812.11	protein_coding;protein_coding	2;2	5;5	FBXL3-201;FBXL3-201	1;1
13	77016124	exon;three_prime_UTR	77012801;77012906	77017131;77017131	+;+	CLN5;CLN5	ENSG00000102805.16;ENSG00000102805.16	protein_coding;protein_coding	2;2	5;5	CLN5-218;CLN5-218	5;5
13	77082103	exon	77081806	77082186	+	MYCBP2-AS1	ENSG00000236051.7	lncRNA	2	2	MYCBP2-AS1-209	5
13	78597213	exon	78596129	78599619	+	AL445209.1	ENSG00000271776.1	lncRNA	2	1	AL445209.1-201	NA
13	78599989	exon;three_prime_UTR	78598362;78598362	78602551;78601414	-;-	POU4F1;POU4F1	ENSG00000152192.8;ENSG00000152192.8	protein_coding;protein_coding	2;2	2;2	POU4F1-201;POU4F1-201	1;1
13	79319970	exon;three_prime_UTR;exon;three_prime_UTR;exon;three_prime_UTR;exon;three_prime_UTR	79318868;79318868;79318868;79318868;79318868;79318868;79319954;79319954	79320710;79320620;79320710;79320620;79320710;79320620;79320710;79320620	-;-;-;-;-;-;-;-	RBM26;RBM26;RBM26;RBM26;RBM26;RBM26;RBM26;RBM26	ENSG00000139746.16;ENSG00000139746.16;ENSG00000139746.16;ENSG00000139746.16;ENSG00000139746.16;ENSG00000139746.16;ENSG00000139746.16;ENSG00000139746.16	protein_coding;protein_coding;protein_coding;protein_coding;protein_coding;protein_coding;protein_coding;protein_coding	3;3;3;3;2;2;2;2	21;21;22;22;22;22;21;21	RBM26-202;RBM26-202;RBM26-207;RBM26-207;RBM26-203;RBM26-203;RBM26-201;RBM26-201	1;1;2;2;5;5;1;1
13	79426547	exon	79423552	79427317	+	RBM26-AS1	ENSG00000227354.7	lncRNA	2	7	RBM26-AS1-206	None
13	79426563	exon	79423552	79427317	+	RBM26-AS1	ENSG00000227354.7	lncRNA	2	7	RBM26-AS1-206	None
13	80888403	exon	80888348	80888867	+	ARF4P4	ENSG00000231222.1	processed_pseudogene	1	1	ARF4P4-201	NA
13	87810336	exon	87807634	87811232	-	AL445647.1	ENSG00000272046.1	lncRNA	2	1	AL445647.1-201	NA
13	88473675	exon	88472151	88474466	-	AL355677.1	ENSG00000285811.1	lncRNA	2	2	AL355677.1-201	None
13	88568325	exon	88567989	88569261	-	AL445984.2	ENSG00000286422.2	lncRNA	2	1	AL445984.2-201	None
13	90119638	exon	90118773	90119719	-	LINC00559	ENSG00000261446.4	lncRNA	2	1	LINC00559-201	1
13	90891489	exon	90890954	90892441	-	LINC00410	ENSG00000231674.1	lncRNA	2	6	LINC00410-201	2
13	92448881	exon	92446470	92449056	+	AL159152.1	ENSG00000283097.1	TEC	2	1	AL159152.1-201	NA
13	92448897	exon	92446470	92449056	+	AL159152.1	ENSG00000283097.1	TEC	2	1	AL159152.1-201	NA
13	94437387	exon;three_prime_UTR	94436811;94436811	94440076;94439897	-;-	DCT;DCT	ENSG00000080166.16;ENSG00000080166.16	protein_coding;protein_coding	2;2	8;8	DCT-201;DCT-201	1;1
13	94714326	exon	94713638	94716246	+	SOX21-AS1	ENSG00000227640.3	lncRNA	2	2	SOX21-AS1-201	2
13	95760214	exon;CDS;exon;CDS	95760040;95760040;95760040;95760040	95760221;95760221;95760221;95760221	+;+;+;+	DNAJC3;DNAJC3;DNAJC3;DNAJC3	ENSG00000102580.15;ENSG00000102580.15;ENSG00000102580.15;ENSG00000102580.15	protein_coding;protein_coding;protein_coding;protein_coding	2;2;1;1	6;6;5;5	DNAJC3-202;DNAJC3-202;DNAJC3-201;DNAJC3-201	1;1;5;5
13	95801637	exon;three_prime_UTR	95801580;95801580	95801812;95801789	-;-	UGGT2;UGGT2	ENSG00000102595.20;ENSG00000102595.20	protein_coding;protein_coding	2;2	39;39	UGGT2-203;UGGT2-203	1;1
13	95927034	exon;CDS	95927028;95927028	95927126;95927126	-;-	UGGT2;UGGT2	ENSG00000102595.20;ENSG00000102595.20	protein_coding;protein_coding	2;2	19;19	UGGT2-203;UGGT2-203	1;1
13	97392841	exon;three_prime_UTR;exon;three_prime_UTR;exon;three_prime_UTR;exon;three_prime_UTR	97391322;97391450;97391322;97391450;97391322;97391450;97391322;97391337	97394120;97394120;97394119;97394119;97394119;97394119;97394120;97394120	+;+;+;+;+;+;+;+	MBNL2;MBNL2;MBNL2;MBNL2;MBNL2;MBNL2;MBNL2;MBNL2	ENSG00000139793.18;ENSG00000139793.18;ENSG00000139793.18;ENSG00000139793.18;ENSG00000139793.18;ENSG00000139793.18;ENSG00000139793.18;ENSG00000139793.18	protein_coding;protein_coding;protein_coding;protein_coding;protein_coding;protein_coding;protein_coding;protein_coding	2;2;3;3;3;3;2;2	7;7;7;7;8;8;9;9	MBNL2-204;MBNL2-204;MBNL2-201;MBNL2-201;MBNL2-203;MBNL2-203;MBNL2-202;MBNL2-202	5;5;1;1;1;1;1;1
13	98396752	exon;three_prime_UTR	98395227;98396469	98407494;98407494	+;+	FARP1;FARP1	ENSG00000152767.17;ENSG00000152767.17	protein_coding;protein_coding	2;2	13;13	FARP1-219;FARP1-219	5;5
14	100481167	exon	100480952	100481274	+	AL845552.1	ENSG00000258500.2	transcribed_processed_pseudogene	1	1	AL845552.1-201	NA
14	100671649	exon;exon	100671561;100671561	100672775;100672777	+;+	LINC00523;LINC00523	ENSG00000196273.8;ENSG00000196273.8	lncRNA;lncRNA	2;2	2;5	LINC00523-206;LINC00523-210	2;None
14	100937375	exon	100935772	100937488	+	MEG8	ENSG00000225746.13	lncRNA	2	7	MEG8-222	5
14	101766316	exon;three_prime_UTR	101765154;101765268	101767049;101767049	+;+	PPP2R5C;PPP2R5C	ENSG00000078304.19;ENSG00000078304.19	protein_coding;protein_coding	1;1	3;3	PPP2R5C-218;PPP2R5C-218	3;3
14	102212773	exon;three_prime_UTR	102212520;102212583	102215005;102215005	+;+	WDR20;WDR20	ENSG00000140153.18;ENSG00000140153.18	protein_coding;protein_coding	1;1	4;4	WDR20-202;WDR20-202	1;1
14	102428285	exon;CDS;exon;CDS	102428250;102428250;102428250;102428250	102428382;102428382;102428382;102428382	+;+;+;+	TECPR2;TECPR2;TECPR2;TECPR2	ENSG00000196663.16;ENSG00000196663.16;ENSG00000196663.16;ENSG00000196663.16	protein_coding;protein_coding;protein_coding;protein_coding	2;2;2;2	7;7;7;7	TECPR2-201;TECPR2-201;TECPR2-203;TECPR2-203	1;1;1;1
14	103557554	exon;three_prime_UTR;exon;three_prime_UTR	103556544;103556544;103556545;103556545	103561192;103559820;103561192;103559820	-;-;-;-	BAG5;BAG5;BAG5;BAG5	ENSG00000166170.9;ENSG00000166170.9;ENSG00000166170.9;ENSG00000166170.9	protein_coding;protein_coding;protein_coding;protein_coding	3;3;2;2	2;2;2;2	BAG5-201;BAG5-201;BAG5-203;BAG5-203	1;1;1;1
14	103574124	exon;CDS;exon;CDS;exon;CDS;exon;five_prime_UTR;exon;CDS	103574107;103574107;103574107;103574107;103574107;103574107;103574107;103574107;103574107;103574107	103574170;103574170;103574170;103574170;103574170;103574170;103574170;103574170;103574170;103574170	+;+;+;+;+;+;+;+;+;+	COA8;COA8;COA8;COA8;COA8;COA8;COA8;COA8;AL139300.1;AL139300.1	ENSG00000256053.9;ENSG00000256053.9;ENSG00000256053.9;ENSG00000256053.9;ENSG00000256053.9;ENSG00000256053.9;ENSG00000256053.9;ENSG00000256053.9;ENSG00000256500.6;ENSG00000256500.6	protein_coding;protein_coding;protein_coding;protein_coding;protein_coding;protein_coding;protein_coding;protein_coding;protein_coding;protein_coding	2;2;3;3;2;2;2;2;2;2	3;3;3;3;3;3;3;3;3;3	COA8-201;COA8-201;COA8-217;COA8-217;COA8-215;COA8-215;COA8-207;COA8-207;AL139300.1-201;AL139300.1-201	1;1;None;None;3;3;3;3;2;2
14	103686561	exon;three_prime_UTR	103685638;103685638	103686917;103686917	+;+	KLC1;KLC1	ENSG00000126214.21;ENSG00000126214.21	protein_coding;protein_coding	2;2	15;15	KLC1-206;KLC1-206	1;1
14	103733999	exon;three_prime_UTR	103733195;103733195	103735195;103735153	-;-	PPP1R13B;PPP1R13B	ENSG00000088808.18;ENSG00000088808.18	protein_coding;protein_coding	2;2	17;17	PPP1R13B-201;PPP1R13B-201	1;1
14	103940737	exon;three_prime_UTR	103940426;103940426	103941103;103940805	-;-	RD3L;RD3L	ENSG00000227729.5;ENSG00000227729.5	protein_coding;protein_coding	1;1	3;3	RD3L-201;RD3L-201	3;3
14	104836567	exon	104835997	104836852	-	RPS2P4	ENSG00000196183.5	processed_pseudogene	1	1	RPS2P4-201	NA
14	104889711	exon;CDS;exon;CDS;exon;CDS	104889620;104889620;104889515;104889515;104889515;104889515	104889758;104889758;104889758;104889758;104889758;104889758	+;+;+;+;+;+	CEP170B;CEP170B;CEP170B;CEP170B;CEP170B;CEP170B	ENSG00000099814.16;ENSG00000099814.16;ENSG00000099814.16;ENSG00000099814.16;ENSG00000099814.16;ENSG00000099814.16	protein_coding;protein_coding;protein_coding;protein_coding;protein_coding;protein_coding	2;2;2;2;3;3	13;13;12;12;13;13	CEP170B-202;CEP170B-202;CEP170B-204;CEP170B-204;CEP170B-203;CEP170B-203	1;1;5;5;5;5
14	104950891	exon;CDS	104937253;104938063	104954799;104954799	-;-	AHNAK2;AHNAK2	ENSG00000185567.7;ENSG00000185567.7	protein_coding;protein_coding	2;2	7;7	AHNAK2-201;AHNAK2-201	5;5
14	105395354	exon;three_prime_UTR	105394554;105394673	105398147;105398147	+;+	PACS2;PACS2	ENSG00000179364.14;ENSG00000179364.14	protein_coding;protein_coding	2;2	25;25	PACS2-203;PACS2-203	1;1
14	18646082	exon;exon	18645044;18645991	18646221;18646503	-;+	CR383656.8;CR383656.11	ENSG00000257731.2;ENSG00000258076.1	processed_pseudogene;processed_pseudogene	1;2	1;1	CR383656.8-201;CR383656.11-201	NA;NA
14	18977294	exon	18977180	18978870	-	AL929601.3	ENSG00000275563.1	lncRNA	2	2	AL929601.3-201	1
14	19132291	exon	19131842	19132890	-	AL589182.2	ENSG00000278594.1	processed_pseudogene	1	1	AL589182.2-201	NA
14	19616314	exon	19616184	19616619	+	NF1P11	ENSG00000278184.1	unprocessed_pseudogene	2	4	NF1P11-201	NA
14	19829017	exon;three_prime_UTR	19827440;19828373	19830253;19830253	+;+	OR4N2;OR4N2	ENSG00000176294.6;ENSG00000176294.6	protein_coding;protein_coding	2;2	2;2	OR4N2-203;OR4N2-203	NA;NA
14	19876260	exon;five_prime_UTR;exon;five_prime_UTR	19876245;19876245;19876232;19876232	19883932;19876267;19877309;19876267	+;+;+;+	OR4K2;OR4K2;OR4K2;OR4K2	ENSG00000165762.3;ENSG00000165762.3;ENSG00000165762.3;ENSG00000165762.3	protein_coding;protein_coding;protein_coding;protein_coding	2;2;2;2	2;2;1;1	OR4K2-204;OR4K2-204;OR4K2-201;OR4K2-201	None;None;NA;NA
14	19882366	exon;three_prime_UTR	19876245;19877213	19883932;19883932	+;+	OR4K2;OR4K2	ENSG00000165762.3;ENSG00000165762.3	protein_coding;protein_coding	2;2	2;2	OR4K2-204;OR4K2-204	None;None
14	20003405	exon;three_prime_UTR	20002148;20003106	20004760;20004760	+;+	OR4Q2;OR4Q2	ENSG00000196383.6;ENSG00000196383.6	polymorphic_pseudogene;polymorphic_pseudogene	2;2	3;3	OR4Q2-201;OR4Q2-201	NA;NA
14	20144028	exon;CDS;exon;CDS	20143725;20143736;20143736;20143736	20145471;20144662;20144662;20144662	+;+;+;+	OR4N5;OR4N5;OR4N5;OR4N5	ENSG00000184394.2;ENSG00000184394.2;ENSG00000184394.2;ENSG00000184394.2	protein_coding;protein_coding;protein_coding;protein_coding	2;2;3;3	3;3;1;1	OR4N5-202;OR4N5-202;OR4N5-201;OR4N5-201	None;None;NA;NA
14	20286407	exon;three_prime_UTR	20286227;20286227	20289746;20289626	-;-	TTC5;TTC5	ENSG00000136319.12;ENSG00000136319.12	protein_coding;protein_coding	2;2	10;10	TTC5-201;TTC5-201	1;1
14	20343065	exon	20343048	20343685	-	AL355075.4	ENSG00000259001.3	lncRNA	2	1	AL355075.4-201	NA
14	20426525	exon;three_prime_UTR;exon;three_prime_UTR	20425852;20425852;20425870;20425870	20429401;20428848;20429432;20429401	-;-;-;-	KLHL33;KLHL33;KLHL33;KLHL33	ENSG00000185271.9;ENSG00000185271.9;ENSG00000185271.9;ENSG00000185271.9	protein_coding;protein_coding;protein_coding;protein_coding	2;2;2;2	5;5;4;4	KLHL33-202;KLHL33-202;KLHL33-203;KLHL33-203	5;5;5;5
14	20699908	exon;three_prime_UTR;exon;three_prime_UTR;exon;three_prime_UTR;exon;three_prime_UTR	20699355;20699816;20699355;20699816;20699355;20699816;20699355;20699365	20701216;20701216;20700093;20700093;20700602;20700602;20700576;20700576	+;+;+;+;+;+;+;+	RNASE4;RNASE4;RNASE4;RNASE4;RNASE4;RNASE4;AL163636.2;AL163636.2	ENSG00000258818.4;ENSG00000258818.4;ENSG00000258818.4;ENSG00000258818.4;ENSG00000258818.4;ENSG00000258818.4;ENSG00000259171.1;ENSG00000259171.1	protein_coding;protein_coding;protein_coding;protein_coding;protein_coding;protein_coding;protein_coding;protein_coding	2;2;2;2;2;2;2;2	2;2;2;2;2;2;3;3	RNASE4-203;RNASE4-203;RNASE4-201;RNASE4-201;RNASE4-202;RNASE4-202;AL163636.2-201;AL163636.2-201	1;1;2;2;2;2;2;2
14	21099011	exon;five_prime_UTR;exon;five_prime_UTR	21098811;21098811;21098937;21098937	21099014;21099014;21099198;21099198	-;-;+;+	ZNF219;ZNF219;TMEM253;TMEM253	ENSG00000165804.16;ENSG00000165804.16;ENSG00000232070.9;ENSG00000232070.9	protein_coding;protein_coding;protein_coding;protein_coding	2;2;3;3	1;1;1;1	ZNF219-202;ZNF219-202;TMEM253-201;TMEM253-201	1;1;5;5
14	21153672	exon;three_prime_UTR;exon;three_prime_UTR	21148370;21148370;21148370;21148370	21155886;21154936;21155886;21154936	-;-;-;-	OR5AU1;OR5AU1;OR5AU1;OR5AU1	ENSG00000169327.5;ENSG00000169327.5;ENSG00000169327.5;ENSG00000169327.5	protein_coding;protein_coding;protein_coding;protein_coding	2;2;2;2	2;2;2;2	OR5AU1-202;OR5AU1-202;OR5AU1-203;OR5AU1-203	None;None;None;None
14	21234245	exon;five_prime_UTR	21233953;21234194	21234245;21234245	-;-	HNRNPC;HNRNPC	ENSG00000092199.17;ENSG00000092199.17	protein_coding;protein_coding	3;3	1;1	HNRNPC-204;HNRNPC-204	5;5
14	21265374	exon;five_prime_UTR	21262601;21262601	21265516;21265516	-;-	HNRNPC;HNRNPC	ENSG00000092199.17;ENSG00000092199.17	protein_coding;protein_coding	2;2	1;1	HNRNPC-203;HNRNPC-203	1;1
14	21564227	exon	21563819	21565084	+	RBBP4P5	ENSG00000256737.1	processed_pseudogene	1	1	RBBP4P5-201	NA
14	21990792	exon;CDS	21990656;21990656	21990938;21990938	+;+	TRAV16;TRAV16	ENSG00000211796.1;ENSG00000211796.1	TR_V_gene;TR_V_gene	2;2	2;2	TRAV16-201;TRAV16-201	NA;NA
14	22334569	exon	22334390	22334685	-	AC244502.2	ENSG00000256221.1	processed_pseudogene	1	1	AC244502.2-201	NA
14	22766568	exon;CDS	22766522;22766522	22766764;22766764	+;+	OXA1L;OXA1L	ENSG00000155463.14;ENSG00000155463.14	protein_coding;protein_coding	3;3	1;1	OXA1L-201;OXA1L-201	1;1
14	22900307	exon;three_prime_UTR	22893204;22893204	22901733;22901729	-;-	RBM23;RBM23	ENSG00000100461.18;ENSG00000100461.18	protein_coding;protein_coding	2;2	14;14	RBM23-203;RBM23-203	1;1
14	23295608	exon;exon	23293852;23295188	23295726;23295798	+;+	H3P37;H3P37	ENSG00000270433.1;ENSG00000270433.1	transcribed_unprocessed_pseudogene;transcribed_unprocessed_pseudogene	2;1	1;2	H3P37-202;H3P37-201	NA;NA
14	24300185	exon;CDS;exon;CDS	24299850;24299955;24299879;24299955	24300201;24300201;24300201;24300201	+;+;+;+	NOP9;NOP9;NOP9;NOP9	ENSG00000196943.14;ENSG00000196943.14;ENSG00000196943.14;ENSG00000196943.14	protein_coding;protein_coding;protein_coding;protein_coding	2;2;2;2	1;1;1;1	NOP9-201;NOP9-201;NOP9-202;NOP9-202	1;1;5;5
14	24307641	exon;three_prime_UTR	24304938;24305096	24309124;24309124	+;+	NOP9;NOP9	ENSG00000196943.14;ENSG00000196943.14	protein_coding;protein_coding	2;2	10;10	NOP9-201;NOP9-201	1;1
14	24369493	exon;five_prime_UTR;exon;five_prime_UTR;exon;five_prime_UTR	24369153;24369153;24369153;24369153;24369153;24369153	24370594;24369608;24370594;24369608;24370594;24369608	+;+;+;+;+;+	NFATC4;NFATC4;NFATC4;NFATC4;NFATC4;NFATC4	ENSG00000100968.14;ENSG00000100968.14;ENSG00000100968.14;ENSG00000100968.14;ENSG00000100968.14;ENSG00000100968.14	protein_coding;protein_coding;protein_coding;protein_coding;protein_coding;protein_coding	2;2;2;2;2;2	1;1;1;1;1;1	NFATC4-211;NFATC4-211;NFATC4-215;NFATC4-215;NFATC4-231;NFATC4-231	1;1;1;1;1;1
14	24427499	exon;three_prime_UTR	24426545;24426545	24427986;24427788	-;-	CBLN3;CBLN3	ENSG00000139899.11;ENSG00000139899.11	protein_coding;protein_coding	2;2	3;3	CBLN3-201;CBLN3-201	1;1
14	24811703	exon;three_prime_UTR;exon;three_prime_UTR	24809656;24809656;24809662;24809662	24812732;24812708;24812732;24812708	-;-;-;-	STXBP6;STXBP6;STXBP6;STXBP6	ENSG00000168952.15;ENSG00000168952.15;ENSG00000168952.15;ENSG00000168952.15	protein_coding;protein_coding;protein_coding;protein_coding	2;2;2;2	7;7;6;6	STXBP6-202;STXBP6-202;STXBP6-201;STXBP6-201	1;1;1;1
14	24812197	exon;three_prime_UTR;exon;three_prime_UTR;exon;three_prime_UTR;exon;three_prime_UTR	24809656;24809656;24809662;24809662;24812087;24812087;24812192;24812192	24812732;24812708;24812732;24812708;24812732;24812708;24812732;24812708	-;-;-;-;-;-;-;-	STXBP6;STXBP6;STXBP6;STXBP6;STXBP6;STXBP6;STXBP6;STXBP6	ENSG00000168952.15;ENSG00000168952.15;ENSG00000168952.15;ENSG00000168952.15;ENSG00000168952.15;ENSG00000168952.15;ENSG00000168952.15;ENSG00000168952.15	protein_coding;protein_coding;protein_coding;protein_coding;protein_coding;protein_coding;protein_coding;protein_coding	2;2;2;2;2;2;2;2	7;7;6;6;6;6;6;6	STXBP6-202;STXBP6-202;STXBP6-201;STXBP6-201;STXBP6-203;STXBP6-203;STXBP6-204;STXBP6-204	1;1;1;1;1;1;1;1
14	25918940	exon	25916015	25919421	+	AL132633.1	ENSG00000285633.1	lncRNA	2	1	AL132633.1-201	None
14	26592784	exon	26592747	26594517	-	AL079343.1	ENSG00000262119.1	lncRNA	2	1	AL079343.1-201	NA
14	26597529	exon;five_prime_UTR	26597301;26597437	26598033;26598033	-;-	NOVA1;NOVA1	ENSG00000139910.20;ENSG00000139910.20	protein_coding;protein_coding	2;2	1;1	NOVA1-206;NOVA1-206	1;1
14	26597560	exon;five_prime_UTR	26597301;26597437	26598033;26598033	-;-	NOVA1;NOVA1	ENSG00000139910.20;ENSG00000139910.20	protein_coding;protein_coding	2;2	1;1	NOVA1-206;NOVA1-206	1;1
14	27294319	exon	27293190	27295516	+	AL110292.1	ENSG00000258081.4	lncRNA	2	6	AL110292.1-204	None
14	28730255	exon	28729402	28730791	-	FOXG1-AS1	ENSG00000257126.6	lncRNA	2	1	FOXG1-AS1-204	None
14	29266885	exon	29263252	29267774	-	AL133166.1	ENSG00000257522.7	lncRNA	2	3	AL133166.1-209	None
14	29266900	exon	29263252	29267774	-	AL133166.1	ENSG00000257522.7	lncRNA	2	3	AL133166.1-209	None
14	29267127	exon	29263252	29267774	-	AL133166.1	ENSG00000257522.7	lncRNA	2	3	AL133166.1-209	None
14	30890071	exon;three_prime_UTR;exon;three_prime_UTR;exon;three_prime_UTR;exon;three_prime_UTR	30889616;30889792;30889616;30889792;30889616;30889792;30889616;30889792	30890100;30890100;30890618;30890618;30890618;30890618;30890616;30890616	+;+;+;+;+;+;+;+	COCH;COCH;COCH;COCH;COCH;COCH;COCH;COCH	ENSG00000100473.18;ENSG00000100473.18;ENSG00000100473.18;ENSG00000100473.18;ENSG00000100473.18;ENSG00000100473.18;ENSG00000100473.18;ENSG00000100473.18	protein_coding;protein_coding;protein_coding;protein_coding;protein_coding;protein_coding;protein_coding;protein_coding	2;2;2;2;2;2;1;1	11;11;12;12;11;11;10;10	COCH-201;COCH-201;COCH-202;COCH-202;COCH-214;COCH-214;COCH-203;COCH-203	1;1;1;1;None;None;2;2
14	32834554	exon;three_prime_UTR	32829848;32829848	32837684;32837684	+;+	AKAP6;AKAP6	ENSG00000151320.11;ENSG00000151320.11	protein_coding;protein_coding	2;2	14;14	AKAP6-201;AKAP6-201	1;1
14	33800419	exon;CDS;exon;CDS;exon;CDS;exon;CDS;exon;CDS	33799734;33799734;33799734;33799734;33799734;33799734;33799734;33799734;33799734;33799734	33801109;33801109;33804176;33801109;33801278;33801109;33801109;33801109;33801109;33801109	+;+;+;+;+;+;+;+;+;+	NPAS3;NPAS3;NPAS3;NPAS3;NPAS3;NPAS3;NPAS3;NPAS3;NPAS3;NPAS3	ENSG00000151322.19;ENSG00000151322.19;ENSG00000151322.19;ENSG00000151322.19;ENSG00000151322.19;ENSG00000151322.19;ENSG00000151322.19;ENSG00000151322.19;ENSG00000151322.19;ENSG00000151322.19	protein_coding;protein_coding;protein_coding;protein_coding;protein_coding;protein_coding;protein_coding;protein_coding;protein_coding;protein_coding	2;2;2;2;2;2;2;2;2;2	12;12;11;11;11;11;12;12;12;12	NPAS3-210;NPAS3-210;NPAS3-201;NPAS3-201;NPAS3-206;NPAS3-206;NPAS3-202;NPAS3-202;NPAS3-203;NPAS3-203	5;5;1;1;1;1;1;1;1;1
14	34433636	exon;three_prime_UTR	34432788;34432788	34435304;34435200	-;-	SPTSSA;SPTSSA	ENSG00000165389.7;ENSG00000165389.7	protein_coding;protein_coding	2;2	2;2	SPTSSA-201;SPTSSA-201	1;1
14	34800337	exon;CDS;exon;CDS;exon;CDS	34800224;34800224;34800224;34800224;34800224;34800224	34800390;34800390;34800390;34800390;34800390;34800390	-;-;-;-;-;-	BAZ1A;BAZ1A;BAZ1A;BAZ1A;BAZ1A;BAZ1A	ENSG00000198604.11;ENSG00000198604.11;ENSG00000198604.11;ENSG00000198604.11;ENSG00000198604.11;ENSG00000198604.11	protein_coding;protein_coding;protein_coding;protein_coding;protein_coding;protein_coding	2;2;2;2;2;2	9;9;9;9;8;8	BAZ1A-202;BAZ1A-202;BAZ1A-201;BAZ1A-201;BAZ1A-203;BAZ1A-203	1;1;1;1;1;1
14	35430307	exon	35430260	35430631	+	DNAJC8P1	ENSG00000259022.2	processed_pseudogene	1	1	DNAJC8P1-201	NA
14	36298855	exon;three_prime_UTR;exon;three_prime_UTR;exon;three_prime_UTR;exon;three_prime_UTR	36298564;36298564;36298565;36298565;36298568;36298568;36298590;36298590	36299190;36299082;36299190;36299190;36299187;36299082;36299190;36299170	-;-;-;-;-;-;-;-	MBIP;MBIP;MBIP;MBIP;MBIP;MBIP;MBIP;MBIP	ENSG00000151332.19;ENSG00000151332.19;ENSG00000151332.19;ENSG00000151332.19;ENSG00000151332.19;ENSG00000151332.19;ENSG00000151332.19;ENSG00000151332.19	protein_coding;protein_coding;protein_coding;protein_coding;protein_coding;protein_coding;protein_coding;protein_coding	2;2;3;3;2;2;2;2	9;9;10;10;9;9;8;8	MBIP-203;MBIP-203;MBIP-211;MBIP-211;MBIP-201;MBIP-201;MBIP-202;MBIP-202	1;1;5;5;1;1;1;1
14	37753173	exon;CDS	37753099;37753099	37753235;37753235	+;+	TTC6;TTC6	ENSG00000139865.16;ENSG00000139865.16	protein_coding;protein_coding	1;1	14;14	TTC6-206;TTC6-206	5;5
14	38727436	exon	38727275	38728481	+	KRT8P1	ENSG00000258948.2	processed_pseudogene	1	1	KRT8P1-201	NA
14	39136814	exon;three_prime_UTR	39136440;39136480	39136973;39136973	+;+	GEMIN2;GEMIN2	ENSG00000092208.17;ENSG00000092208.17	protein_coding;protein_coding	2;2	10;10	GEMIN2-202;GEMIN2-202	1;1
14	39266046	exon;five_prime_UTR;exon	39265968;39265968;39265703	39266527;39266527;39267061	+;+;-	MIA2;MIA2;AL132639.2	ENSG00000150527.17;ENSG00000150527.17;ENSG00000258940.2	protein_coding;protein_coding;lncRNA	2;2;2	1;1;1	MIA2-207;MIA2-207;AL132639.2-201	1;1;NA
14	39387919	exon;three_prime_UTR	39386885;39386953	39388513;39388513	+;+	MIA2;MIA2	ENSG00000150527.17;ENSG00000150527.17	protein_coding;protein_coding	2;2	24;24	MIA2-203;MIA2-203	1;1
14	40902628	exon	40901827	40905513	+	AL390800.1	ENSG00000286099.1	lncRNA	2	11	AL390800.1-201	None
14	41584930	exon	41583657	41588287	-	AL121821.2	ENSG00000258636.2	lncRNA	2	3	AL121821.2-202	None
14	42528778	exon	42528669	42528888	+	AL450442.1	ENSG00000258850.1	lncRNA	2	2	AL450442.1-201	1
14	44927428	exon;three_prime_UTR	44924324;44924324	44929191;44929027	-;-	KLHL28;KLHL28	ENSG00000179454.14;ENSG00000179454.14	protein_coding;protein_coding	2;2	5;5	KLHL28-202;KLHL28-202	1;1
14	44927816	exon;three_prime_UTR	44924324;44924324	44929191;44929027	-;-	KLHL28;KLHL28	ENSG00000179454.14;ENSG00000179454.14	protein_coding;protein_coding	2;2	5;5	KLHL28-202;KLHL28-202	1;1
14	44927874	exon;three_prime_UTR	44924324;44924324	44929191;44929027	-;-	KLHL28;KLHL28	ENSG00000179454.14;ENSG00000179454.14	protein_coding;protein_coding	2;2	5;5	KLHL28-202;KLHL28-202	1;1
14	45175332	exon;CDS;exon;CDS	45175071;45175071;45175071;45175071	45176976;45176976;45176976;45176976	+;+;+;+	FANCM;FANCM;FANCM;FANCM	ENSG00000187790.11;ENSG00000187790.11;ENSG00000187790.11;ENSG00000187790.11	protein_coding;protein_coding;protein_coding;protein_coding	2;2;1;1	14;14;13;13	FANCM-201;FANCM-201;FANCM-202;FANCM-202	1;1;1;1
14	45176888	exon;CDS;exon;CDS	45175071;45175071;45175071;45175071	45176976;45176976;45176976;45176976	+;+;+;+	FANCM;FANCM;FANCM;FANCM	ENSG00000187790.11;ENSG00000187790.11;ENSG00000187790.11;ENSG00000187790.11	protein_coding;protein_coding;protein_coding;protein_coding	2;2;1;1	14;14;13;13	FANCM-201;FANCM-201;FANCM-202;FANCM-202	1;1;1;1
14	47761025	exon	47760995	47761104	-	MIR548Y	ENSG00000263945.1	miRNA	3	1	MIR548Y-201	NA
14	49600572	exon	49599994	49600572	+	RHOQP1	ENSG00000258568.1	processed_pseudogene	1	1	RHOQP1-201	NA
14	49625415	exon;three_prime_UTR;exon;three_prime_UTR	49625174;49625174;49625174;49625174	49626048;49625541;49626048;49625541	-;-;-;-	DNAAF2;DNAAF2;DNAAF2;DNAAF2	ENSG00000165506.15;ENSG00000165506.15;ENSG00000165506.15;ENSG00000165506.15	protein_coding;protein_coding;protein_coding;protein_coding	2;2;2;2	2;2;3;3	DNAAF2-202;DNAAF2-202;DNAAF2-201;DNAAF2-201	1;1;1;1
14	49863943	exon;exon	49863829;49863072	49864326;49864379	-;+	AL627171.2;AL627171.1	ENSG00000282885.2;ENSG00000278002.1	lncRNA;lncRNA	2;2	1;1	AL627171.2-201;AL627171.1-201	5;NA
14	50325692	exon;three_prime_UTR;exon;three_prime_UTR;exon;CDS;exon;CDS;exon;three_prime_UTR	50325609;50325632;50325609;50325632;50325609;50325609;50325609;50325609;50325609;50325632	50327957;50327957;50327957;50327957;50327957;50325723;50326226;50325723;50326226;50326226	+;+;+;+;+;+;+;+;+;+	DMAC2L;DMAC2L;DMAC2L;DMAC2L;DMAC2L;DMAC2L;DMAC2L;DMAC2L;DMAC2L;DMAC2L	ENSG00000125375.16;ENSG00000125375.16;ENSG00000125375.16;ENSG00000125375.16;ENSG00000125375.16;ENSG00000125375.16;ENSG00000125375.16;ENSG00000125375.16;ENSG00000125375.16;ENSG00000125375.16	protein_coding;protein_coding;protein_coding;protein_coding;protein_coding;protein_coding;protein_coding;protein_coding;protein_coding;protein_coding	2;2;2;2;2;2;3;3;3;3	4;4;5;5;5;5;5;5;4;4	DMAC2L-212;DMAC2L-212;DMAC2L-213;DMAC2L-213;DMAC2L-202;DMAC2L-202;DMAC2L-206;DMAC2L-206;DMAC2L-201;DMAC2L-201	None;None;None;None;1;1;1;1;1;1
14	50743525	exon;CDS;exon;CDS;exon;CDS;exon;CDS;exon;CDS;exon;CDS;exon;CDS	50743416;50743416;50743416;50743416;50743416;50743416;50743416;50743416;50743416;50743416;50743416;50743416;50743416;50743416	50743529;50743529;50743529;50743529;50743529;50743529;50743529;50743529;50743529;50743529;50743529;50743529;50743529;50743529	-;-;-;-;-;-;-;-;-;-;-;-;-;-	NIN;NIN;NIN;NIN;NIN;NIN;NIN;NIN;NIN;NIN;NIN;NIN;NIN;NIN	ENSG00000100503.25;ENSG00000100503.25;ENSG00000100503.25;ENSG00000100503.25;ENSG00000100503.25;ENSG00000100503.25;ENSG00000100503.25;ENSG00000100503.25;ENSG00000100503.25;ENSG00000100503.25;ENSG00000100503.25;ENSG00000100503.25;ENSG00000100503.25;ENSG00000100503.25	protein_coding;protein_coding;protein_coding;protein_coding;protein_coding;protein_coding;protein_coding;protein_coding;protein_coding;protein_coding;protein_coding;protein_coding;protein_coding;protein_coding	2;2;2;2;2;2;2;2;3;3;2;2;3;3	24;24;24;24;24;24;22;22;23;23;24;24;24;24	NIN-201;NIN-201;NIN-217;NIN-217;NIN-210;NIN-210;NIN-204;NIN-204;NIN-202;NIN-202;NIN-203;NIN-203;NIN-206;NIN-206	5;5;5;5;5;5;1;1;5;5;1;1;5;5
14	50931699	exon;CDS;exon;CDS;exon;CDS	50931673;50931673;50931673;50931673;50931673;50931673	50931776;50931776;50931776;50931776;50931776;50931776	-;-;-;-;-;-	PYGL;PYGL;PYGL;PYGL;PYGL;PYGL	ENSG00000100504.17;ENSG00000100504.17;ENSG00000100504.17;ENSG00000100504.17;ENSG00000100504.17;ENSG00000100504.17	protein_coding;protein_coding;protein_coding;protein_coding;protein_coding;protein_coding	2;2;2;2;2;2	4;4;4;4;3;3	PYGL-205;PYGL-205;PYGL-201;PYGL-201;PYGL-206;PYGL-206	1;1;1;1;2;2
14	52772879	exon;three_prime_UTR;exon;three_prime_UTR	52771033;52771107;52771033;52771107	52774989;52774989;52774941;52774941	+;+;+;+	STYX;STYX;STYX;STYX	ENSG00000198252.12;ENSG00000198252.12;ENSG00000198252.12;ENSG00000198252.12	protein_coding;protein_coding;protein_coding;protein_coding	2;2;2;2	11;11;12;12	STYX-201;STYX-201;STYX-202;STYX-202	1;1;1;1
14	52776248	exon;three_prime_UTR	52775193;52775193	52778458;52778310	-;-	GNPNAT1;GNPNAT1	ENSG00000100522.10;ENSG00000100522.10	protein_coding;protein_coding	2;2	6;6	GNPNAT1-201;GNPNAT1-201	1;1
14	52859499	exon;three_prime_UTR	52859488;52859488	52859714;52859560	-;-	FERMT2;FERMT2	ENSG00000073712.15;ENSG00000073712.15	protein_coding;protein_coding	2;2	15;15	FERMT2-204;FERMT2-204	1;1
14	53327077	exon;exon;exon	53326608;53326608;53326601	53327719;53327716;53327714	+;+;+	AL365295.1;AL365295.1;AL365295.1	ENSG00000237356.7;ENSG00000237356.7;ENSG00000237356.7	lncRNA;lncRNA;lncRNA	2;2;2	7;3;7	AL365295.1-209;AL365295.1-211;AL365295.1-222	None;None;None
14	53613038	exon	53612724	53613405	+	RPS3AP46	ENSG00000226132.1	processed_pseudogene	1	1	RPS3AP46-201	NA
14	54426691	exon;three_prime_UTR	54423561;54423561	54427841;54427813	-;-	CNIH1;CNIH1	ENSG00000100528.12;ENSG00000100528.12	protein_coding;protein_coding	2;2	5;5	CNIH1-201;CNIH1-201	1;1
14	55145301	exon;three_prime_UTR	55145116;55145272	55145423;55145423	+;+	LGALS3;LGALS3	ENSG00000131981.16;ENSG00000131981.16	protein_coding;protein_coding	2;2	6;6	LGALS3-201;LGALS3-201	1;1
14	55943739	exon	55943640	55943812	+	AL163952.1	ENSG00000259868.3	lncRNA	2	2	AL163952.1-201	5
14	57041288	exon	57040885	57042504	+	AL137100.1	ENSG00000258758.1	processed_pseudogene	1	1	AL137100.1-201	NA
14	57293523	exon;three_prime_UTR	57288802;57288885	57298742;57298742	+;+	AP5M1;AP5M1	ENSG00000053770.12;ENSG00000053770.12	protein_coding;protein_coding	2;2	8;8	AP5M1-201;AP5M1-201	1;1
14	57470698	exon;three_prime_UTR	57469300;57469300	57471590;57471354	-;-	CCDC198;CCDC198	ENSG00000100557.10;ENSG00000100557.10	protein_coding;protein_coding	2;2	6;6	CCDC198-201;CCDC198-201	1;1
14	57471344	exon;three_prime_UTR;exon;three_prime_UTR;exon;three_prime_UTR	57469300;57469300;57471255;57471255;57471255;57471255	57471590;57471354;57471590;57471354;57471590;57471354	-;-;-;-;-;-	CCDC198;CCDC198;CCDC198;CCDC198;CCDC198;CCDC198	ENSG00000100557.10;ENSG00000100557.10;ENSG00000100557.10;ENSG00000100557.10;ENSG00000100557.10;ENSG00000100557.10	protein_coding;protein_coding;protein_coding;protein_coding;protein_coding;protein_coding	2;2;2;2;1;1	6;6;6;6;7;7	CCDC198-201;CCDC198-201;CCDC198-210;CCDC198-210;CCDC198-202;CCDC198-202	1;1;1;1;1;1
14	57493738	exon;five_prime_UTR;exon;five_prime_UTR;exon;five_prime_UTR;exon;five_prime_UTR	57493493;57493716;57493493;57493716;57493493;57493716;57493493;57493716	57493857;57493857;57493757;57493757;57493757;57493757;57493846;57493846	-;-;-;-;-;-;-;-	CCDC198;CCDC198;CCDC198;CCDC198;CCDC198;CCDC198;CCDC198;CCDC198	ENSG00000100557.10;ENSG00000100557.10;ENSG00000100557.10;ENSG00000100557.10;ENSG00000100557.10;ENSG00000100557.10;ENSG00000100557.10;ENSG00000100557.10	protein_coding;protein_coding;protein_coding;protein_coding;protein_coding;protein_coding;protein_coding;protein_coding	2;2;2;2;1;1;2;2	1;1;1;1;1;1;1;1	CCDC198-201;CCDC198-201;CCDC198-210;CCDC198-210;CCDC198-202;CCDC198-202;CCDC198-204;CCDC198-204	1;1;1;1;1;1;4;4
14	58003881	exon;three_prime_UTR	58000761;58000761	58004804;58004735	-;-	ARMH4;ARMH4	ENSG00000139971.15;ENSG00000139971.15	protein_coding;protein_coding	2;2	8;8	ARMH4-201;ARMH4-201	1;1
14	58274036	exon	58273979	58274135	-	PSMA3-AS1	ENSG00000257621.8	lncRNA	2	3	PSMA3-AS1-208	2
14	59472948	exon;three_prime_UTR	59472606;59472606	59473090;59472964	-;-	L3HYPDH;L3HYPDH	ENSG00000126790.12;ENSG00000126790.12	protein_coding;protein_coding	2;2	5;5	L3HYPDH-201;L3HYPDH-201	1;1
14	60108781	exon;three_prime_UTR	60107586;60108332	60111157;60111157	+;+	PCNX4;PCNX4	ENSG00000126773.13;ENSG00000126773.13	protein_coding;protein_coding	2;2	2;2	PCNX4-202;PCNX4-202	2;2
14	60145815	exon;three_prime_UTR;exon;three_prime_UTR	60133970;60134222;60133970;60134222	60148221;60148221;60148221;60148221	+;+;+;+	PCNX4;PCNX4;PCNX4;PCNX4	ENSG00000126773.13;ENSG00000126773.13;ENSG00000126773.13;ENSG00000126773.13	protein_coding;protein_coding;protein_coding;protein_coding	2;2;2;2	10;10;11;11	PCNX4-201;PCNX4-201;PCNX4-203;PCNX4-203	5;5;5;5
14	60286692	exon;three_prime_UTR	60285624;60285765	60288555;60288555	+;+	PPM1A;PPM1A	ENSG00000100614.18;ENSG00000100614.18	protein_coding;protein_coding	1;1	4;4	PPM1A-202;PPM1A-202	1;1
14	61536182	exon;exon	61535385;61535393	61537906;61537906	-;-	AL355916.2;AL355916.2	ENSG00000258926.2;ENSG00000258926.2	lncRNA;lncRNA	2;2	2;4	AL355916.2-201;AL355916.2-204	None;None
14	61654085	exon	61653623	61654786	+	AL355916.1	ENSG00000232774.8	lncRNA	2	3	AL355916.1-201	2
14	63373677	exon;three_prime_UTR	63371364;63371364	63376108;63376008	-;-	PPP2R5E;PPP2R5E	ENSG00000154001.14;ENSG00000154001.14	protein_coding;protein_coding	2;2	14;14	PPP2R5E-201;PPP2R5E-201	1;1
14	63598382	exon;three_prime_UTR;exon;three_prime_UTR	63597039;63597039;63597040;63597040	63599973;63598778;63599974;63598778	-;-;-;-	WDR89;WDR89;WDR89;WDR89	ENSG00000140006.11;ENSG00000140006.11;ENSG00000140006.11;ENSG00000140006.11	protein_coding;protein_coding;protein_coding;protein_coding	2;2;3;3	2;2;1;1	WDR89-202;WDR89-202;WDR89-204;WDR89-204	5;5;NA;NA
14	63993849	exon;CDS;exon;CDS;exon;CDS;exon;CDS;exon;CDS	63993835;63993835;63993835;63993835;63993835;63993835;63993835;63993835;63993835;63993835	63993969;63993969;63993969;63993969;63993969;63993969;63993969;63993969;63993969;63993969	+;+;+;+;+;+;+;+;+;+	SYNE2;SYNE2;SYNE2;SYNE2;SYNE2;SYNE2;SYNE2;SYNE2;SYNE2;SYNE2	ENSG00000054654.19;ENSG00000054654.19;ENSG00000054654.19;ENSG00000054654.19;ENSG00000054654.19;ENSG00000054654.19;ENSG00000054654.19;ENSG00000054654.19;ENSG00000054654.19;ENSG00000054654.19	protein_coding;protein_coding;protein_coding;protein_coding;protein_coding;protein_coding;protein_coding;protein_coding;protein_coding;protein_coding	3;3;3;3;2;2;2;2;1;1	22;22;22;22;22;22;22;22;21;21	SYNE2-203;SYNE2-203;SYNE2-204;SYNE2-204;SYNE2-202;SYNE2-202;SYNE2-216;SYNE2-216;SYNE2-212;SYNE2-212	5;5;5;5;1;1;1;1;5;5
14	64227703	exon;three_prime_UTR	64227453;64227453	64227929;64227889	-;-	ESR2;ESR2	ENSG00000140009.18;ENSG00000140009.18	protein_coding;protein_coding	1;1	8;8	ESR2-209;ESR2-209	1;1
14	64440832	exon	64440369	64442238	-	AL122035.2	ENSG00000272909.1	lncRNA	2	1	AL122035.2-201	NA
14	64471797	exon;three_prime_UTR	64468132;64469679	64474503;64474503	+;+	AKAP5;AKAP5	ENSG00000179841.8;ENSG00000179841.8	protein_coding;protein_coding	2;2	2;2	AKAP5-202;AKAP5-202	1;1
14	64473150	exon;three_prime_UTR	64468132;64469679	64474503;64474503	+;+	AKAP5;AKAP5	ENSG00000179841.8;ENSG00000179841.8	protein_coding;protein_coding	2;2	2;2	AKAP5-202;AKAP5-202	1;1
14	64523843	exon;three_prime_UTR	64521487;64523647	64523898;64523898	+;+	ZBTB1;ZBTB1	ENSG00000126804.13;ENSG00000126804.13	protein_coding;protein_coding	2;2	4;4	ZBTB1-203;ZBTB1-203	1;1
14	69380328	exon;three_prime_UTR	69380128;69380128	69380640;69380537	-;-	ERH;ERH	ENSG00000100632.11;ENSG00000100632.11	protein_coding;protein_coding	2;2	4;4	ERH-203;ERH-203	1;1
14	70722692	exon;three_prime_UTR;exon;three_prime_UTR	70722526;70722526;70722526;70722526	70730864;70730379;70730864;70730379	-;-;-;-	MAP3K9;MAP3K9;MAP3K9;MAP3K9	ENSG00000006432.15;ENSG00000006432.15;ENSG00000006432.15;ENSG00000006432.15	protein_coding;protein_coding;protein_coding;protein_coding	3;3;2;2	11;11;12;12	MAP3K9-207;MAP3K9-207;MAP3K9-205;MAP3K9-205	5;5;1;1
14	70723684	exon;three_prime_UTR;exon;three_prime_UTR	70722526;70722526;70722526;70722526	70730864;70730379;70730864;70730379	-;-;-;-	MAP3K9;MAP3K9;MAP3K9;MAP3K9	ENSG00000006432.15;ENSG00000006432.15;ENSG00000006432.15;ENSG00000006432.15	protein_coding;protein_coding;protein_coding;protein_coding	3;3;2;2	11;11;12;12	MAP3K9-207;MAP3K9-207;MAP3K9-205;MAP3K9-205	5;5;1;1
14	70729484	exon;three_prime_UTR;exon;three_prime_UTR	70722526;70722526;70722526;70722526	70730864;70730379;70730864;70730379	-;-;-;-	MAP3K9;MAP3K9;MAP3K9;MAP3K9	ENSG00000006432.15;ENSG00000006432.15;ENSG00000006432.15;ENSG00000006432.15	protein_coding;protein_coding;protein_coding;protein_coding	3;3;2;2	11;11;12;12	MAP3K9-207;MAP3K9-207;MAP3K9-205;MAP3K9-205	5;5;1;1
14	72661854	exon;three_prime_UTR;exon;three_prime_UTR;exon;three_prime_UTR	72661043;72661043;72661043;72661043;72661043;72661043	72662833;72662833;72662833;72662833;72662833;72662833	-;-;-;-;-;-	DPF3;DPF3;DPF3;DPF3;DPF3;DPF3	ENSG00000205683.11;ENSG00000205683.11;ENSG00000205683.11;ENSG00000205683.11;ENSG00000205683.11;ENSG00000205683.11	protein_coding;protein_coding;protein_coding;protein_coding;protein_coding;protein_coding	3;3;3;3;3;3	10;10;10;10;11;11	DPF3-215;DPF3-215;DPF3-203;DPF3-203;DPF3-216;DPF3-216	2;2;1;1;5;5
14	73068405	exon	73068108	73068618	-	AL442663.2	ENSG00000258448.1	processed_pseudogene	1	1	AL442663.2-201	NA
14	73463430	exon	73462362	73464391	+	AC005280.1	ENSG00000251393.4	lncRNA	2	1	AC005280.1-203	None
14	73523066	exon;CDS;exon;CDS	73522272;73522272;73522272;73522272	73523224;73523152;73523224;73523152	-;-;-;-	HEATR4;HEATR4;HEATR4;HEATR4	ENSG00000187105.9;ENSG00000187105.9;ENSG00000187105.9;ENSG00000187105.9	protein_coding;protein_coding;protein_coding;protein_coding	2;2;2;2	3;3;2;2	HEATR4-202;HEATR4-202;HEATR4-201;HEATR4-201	2;2;1;1
14	73840524	exon	73840520	73840609	-	AC005520.4	ENSG00000270576.1	processed_pseudogene	1	1	AC005520.4-201	NA
14	73881288	exon;CDS;exon;CDS;exon;CDS;exon;CDS;exon;CDS	73881205;73881205;73881205;73881205;73881205;73881205;73881205;73881205;73881205;73881205	73881292;73881292;73881292;73881292;73881292;73881292;73881292;73881292;73881292;73881292	+;+;+;+;+;+;+;+;+;+	PTGR2;PTGR2;PTGR2;PTGR2;PTGR2;PTGR2;PTGR2;PTGR2;AC005520.1;AC005520.1	ENSG00000140043.11;ENSG00000140043.11;ENSG00000140043.11;ENSG00000140043.11;ENSG00000140043.11;ENSG00000140043.11;ENSG00000140043.11;ENSG00000140043.11;ENSG00000258653.3;ENSG00000258653.3	protein_coding;protein_coding;protein_coding;protein_coding;protein_coding;protein_coding;protein_coding;protein_coding;protein_coding;protein_coding	2;2;2;2;2;2;2;2;2;2	8;8;8;8;8;8;6;6;7;7	PTGR2-204;PTGR2-204;PTGR2-205;PTGR2-205;PTGR2-201;PTGR2-201;PTGR2-203;PTGR2-203;AC005520.1-201;AC005520.1-201	5;5;1;1;1;1;5;5;2;2
14	74058464	exon;three_prime_UTR	74056847;74056847	74060746;74060641	-;-	ALDH6A1;ALDH6A1	ENSG00000119711.13;ENSG00000119711.13	protein_coding;protein_coding	2;2	12;12	ALDH6A1-202;ALDH6A1-202	1;1
14	74059695	exon;three_prime_UTR	74056847;74056847	74060746;74060641	-;-	ALDH6A1;ALDH6A1	ENSG00000119711.13;ENSG00000119711.13	protein_coding;protein_coding	2;2	12;12	ALDH6A1-202;ALDH6A1-202	1;1
14	74060003	exon;three_prime_UTR	74056847;74056847	74060746;74060641	-;-	ALDH6A1;ALDH6A1	ENSG00000119711.13;ENSG00000119711.13	protein_coding;protein_coding	2;2	12;12	ALDH6A1-202;ALDH6A1-202	1;1
14	74359626	exon;three_prime_UTR	74356783;74358893	74360008;74360008	+;+	VRTN;VRTN	ENSG00000133980.5;ENSG00000133980.5	protein_coding;protein_coding	2;2	2;2	VRTN-201;VRTN-201	1;1
14	74712038	exon	74711936	74712045	+	AC007956.1	ENSG00000222604.2	snoRNA	3	1	AC007956.1-201	NA
14	74735113	exon;three_prime_UTR;exon;three_prime_UTR	74734882;74734931;74734882;74734931	74738620;74738620;74735304;74735304	+;+;+;+	FCF1;FCF1;FCF1;FCF1	ENSG00000119616.11;ENSG00000119616.11;ENSG00000119616.11;ENSG00000119616.11	protein_coding;protein_coding;protein_coding;protein_coding	2;2;2;2	8;8;8;8	FCF1-201;FCF1-201;FCF1-203;FCF1-203	1;1;3;3
14	75004718	exon	75004719	75004921	-	AL049780.1	ENSG00000258646.1	lncRNA	2	2	AL049780.1-201	3
14	75886876	exon;three_prime_UTR;exon;three_prime_UTR	75886700;75886761;75886700;75886761	75887307;75887307;75886937;75886937	+;+;+;+	TTLL5;TTLL5;TTLL5;TTLL5	ENSG00000119685.20;ENSG00000119685.20;ENSG00000119685.20;ENSG00000119685.20	protein_coding;protein_coding;protein_coding;protein_coding	2;2;2;2	17;17;16;16	TTLL5-217;TTLL5-217;TTLL5-207;TTLL5-207	1;1;1;1
14	75886941	exon;three_prime_UTR	75886700;75886761	75887307;75887307	+;+	TTLL5;TTLL5	ENSG00000119685.20;ENSG00000119685.20	protein_coding;protein_coding	2;2	17;17	TTLL5-217;TTLL5-217	1;1
14	76014106	exon	76013679	76014143	+	AC008015.1	ENSG00000258578.2	processed_pseudogene	1	1	AC008015.1-201	NA
14	76083687	exon;three_prime_UTR;exon;three_prime_UTR	76083458;76083578;76083458;76083578	76083749;76083749;76083746;76083746	+;+;+;+	IFT43;IFT43;IFT43;IFT43	ENSG00000119650.12;ENSG00000119650.12;ENSG00000119650.12;ENSG00000119650.12	protein_coding;protein_coding;protein_coding;protein_coding	3;3;2;2	9;9;8;8	IFT43-202;IFT43-202;IFT43-201;IFT43-201	2;2;1;1
14	76204599	exon;three_prime_UTR;exon;three_prime_UTR	76201691;76201852;76201691;76201852	76214343;76214343;76212803;76212803	+;+;+;+	GPATCH2L;GPATCH2L;GPATCH2L;GPATCH2L	ENSG00000089916.18;ENSG00000089916.18;ENSG00000089916.18;ENSG00000089916.18	protein_coding;protein_coding;protein_coding;protein_coding	2;2;3;3	10;10;9;9	GPATCH2L-201;GPATCH2L-201;GPATCH2L-214;GPATCH2L-214	2;2;2;2
14	76205923	exon;three_prime_UTR;exon;three_prime_UTR	76201691;76201852;76201691;76201852	76214343;76214343;76212803;76212803	+;+;+;+	GPATCH2L;GPATCH2L;GPATCH2L;GPATCH2L	ENSG00000089916.18;ENSG00000089916.18;ENSG00000089916.18;ENSG00000089916.18	protein_coding;protein_coding;protein_coding;protein_coding	2;2;3;3	10;10;9;9	GPATCH2L-201;GPATCH2L-201;GPATCH2L-214;GPATCH2L-214	2;2;2;2
14	77030080	exon	77028086	77031572	+	AC007686.3	ENSG00000273729.1	lncRNA	2	1	AC007686.3-201	NA
14	77030712	exon	77028086	77031572	+	AC007686.3	ENSG00000273729.1	lncRNA	2	1	AC007686.3-201	NA
14	77336709	exon;three_prime_UTR	77335029;77335029	77341988;77341770	-;-	TMED8;TMED8	ENSG00000100580.8;ENSG00000100580.8	protein_coding;protein_coding	2;2	6;6	TMED8-201;TMED8-201	1;1
14	80983389	exon	80981988	80983638	+	BHLHB9P1	ENSG00000258915.1	processed_pseudogene	1	1	BHLHB9P1-201	NA
14	81260673	exon;three_prime_UTR	81260656;81260656	81261931;81261781	-;-	STON2;STON2	ENSG00000140022.13;ENSG00000140022.13	protein_coding;protein_coding	1;1	8;8	STON2-205;STON2-205	1;1
14	81333011	exon	81332961	81333361	-	AL121769.1	ENSG00000242163.1	processed_pseudogene	1	1	AL121769.1-201	NA
14	81472485	exon;three_prime_UTR	81471547;81471547	81477181;81476971	-;-	SEL1L;SEL1L	ENSG00000071537.14;ENSG00000071537.14	protein_coding;protein_coding	2;2	21;21	SEL1L-201;SEL1L-201	1;1
14	81473182	exon;three_prime_UTR	81471547;81471547	81477181;81476971	-;-	SEL1L;SEL1L	ENSG00000071537.14;ENSG00000071537.14	protein_coding;protein_coding	2;2	21;21	SEL1L-201;SEL1L-201	1;1
14	81734709	exon;exon;exon	81734701;81733707;81734668	81734854;81734854;81734854	-;-;-	LINC02311;LINC02311;LINC02311	ENSG00000258718.3;ENSG00000258718.3;ENSG00000258718.3	lncRNA;lncRNA;lncRNA	2;2;2	3;3;4	LINC02311-203;LINC02311-204;LINC02311-201	None;None;3
14	81752221	exon;exon	81752117;81752117	81752242;81752242	+;+	AL355838.1;AL355838.1	ENSG00000259035.2;ENSG00000259035.2	lncRNA;lncRNA	2;2	2;2	AL355838.1-204;AL355838.1-205	None;None
14	85633029	exon;three_prime_UTR	85621139;85623498	85654428;85654428	+;+	FLRT2;FLRT2	ENSG00000185070.11;ENSG00000185070.11	protein_coding;protein_coding	2;2	2;2	FLRT2-201;FLRT2-201	1;1
14	86060588	exon	86059259	86061562	-	LINC02316	ENSG00000258912.2	lncRNA	2	2	LINC02316-203	None
14	86062829	exon	86062550	86062958	-	LINC02316	ENSG00000258912.2	lncRNA	2	1	LINC02316-206	None
14	86922395	exon	86921465	86922755	+	LINC01148	ENSG00000258804.1	lncRNA	1	5	LINC01148-201	1
14	87734094	exon	87733868	87734298	-	AL359237.1	ENSG00000258807.5	lncRNA	2	1	AL359237.1-202	5
14	88465973	exon;three_prime_UTR;exon;three_prime_UTR	88465778;88465778;88465778;88465778	88468265;88468136;88468265;88468136	-;-;-;-	PTPN21;PTPN21;PTPN21;PTPN21	ENSG00000070778.13;ENSG00000070778.13;ENSG00000070778.13;ENSG00000070778.13	protein_coding;protein_coding;protein_coding;protein_coding	3;3;2;2	18;18;19;19	PTPN21-201;PTPN21-201;PTPN21-208;PTPN21-208	1;1;1;1
14	88467634	exon;three_prime_UTR;exon;three_prime_UTR	88465778;88465778;88465778;88465778	88468265;88468136;88468265;88468136	-;-;-;-	PTPN21;PTPN21;PTPN21;PTPN21	ENSG00000070778.13;ENSG00000070778.13;ENSG00000070778.13;ENSG00000070778.13	protein_coding;protein_coding;protein_coding;protein_coding	3;3;2;2	18;18;19;19	PTPN21-201;PTPN21-201;PTPN21-208;PTPN21-208	1;1;1;1
14	89355219	exon	89355060	89355272	+	AL357093.1	ENSG00000258699.1	lncRNA	2	1	AL357093.1-201	2
14	90850481	exon;three_prime_UTR	90847861;90847861	90872322;90872073	-;-	RPS6KA5;RPS6KA5	ENSG00000100784.12;ENSG00000100784.12	protein_coding;protein_coding	2;2	17;17	RPS6KA5-207;RPS6KA5-207	1;1
14	90865827	exon;three_prime_UTR	90847861;90847861	90872322;90872073	-;-	RPS6KA5;RPS6KA5	ENSG00000100784.12;ENSG00000100784.12	protein_coding;protein_coding	2;2	17;17	RPS6KA5-207;RPS6KA5-207	1;1
14	90865928	exon;three_prime_UTR	90847861;90847861	90872322;90872073	-;-	RPS6KA5;RPS6KA5	ENSG00000100784.12;ENSG00000100784.12	protein_coding;protein_coding	2;2	17;17	RPS6KA5-207;RPS6KA5-207	1;1
14	91258897	exon	91258299	91259003	+	AL135818.2	ENSG00000260810.1	lncRNA	2	1	AL135818.2-201	NA
14	91710409	exon	91709732	91710617	+	AL121839.1	ENSG00000258962.2	processed_pseudogene	1	2	AL121839.1-201	NA
14	91780057	three_prime_UTR;exon	91779746;91779746	91783099;91783210	-;-	TC2N;TC2N	ENSG00000165929.13;ENSG00000165929.13	protein_coding;protein_coding	2;2	12;12	TC2N-203;TC2N-203	2;2
14	91780917	three_prime_UTR;three_prime_UTR;exon;exon	91779746;91780179;91779746;91780179	91783099;91783099;91783210;91783210	-;-;-;-	TC2N;TC2N;TC2N;TC2N	ENSG00000165929.13;ENSG00000165929.13;ENSG00000165929.13;ENSG00000165929.13	protein_coding;protein_coding;protein_coding;protein_coding	2;2;2;2	12;12;12;12	TC2N-203;TC2N-201;TC2N-203;TC2N-201	2;1;2;1
14	91967135	exon;three_prime_UTR	91965991;91965991	91969893;91969672	-;-	TRIP11;TRIP11	ENSG00000100815.12;ENSG00000100815.12	protein_coding;protein_coding	2;2	21;21	TRIP11-201;TRIP11-201	1;1
14	92070760	exon;three_prime_UTR	92070745;92070745	92071053;92070830	-;-	ATXN3;ATXN3	ENSG00000066427.24;ENSG00000066427.24	protein_coding;protein_coding	2;2	10;10	ATXN3-214;ATXN3-214	1;1
14	92163374	exon;three_prime_UTR	92161652;92161745	92172145;92172145	+;+	CPSF2;CPSF2	ENSG00000165934.13;ENSG00000165934.13	protein_coding;protein_coding	2;2	16;16	CPSF2-201;CPSF2-201	1;1
14	93223897	exon	93223598	93224139	-	AL132838.1	ENSG00000240096.1	processed_pseudogene	1	1	AL132838.1-201	NA
14	93706955	exon;three_prime_UTR;exon;three_prime_UTR	93706704;93706905;93706704;93706905	93707272;93707272;93707876;93707876	+;+;+;+	UNC79;UNC79;UNC79;UNC79	ENSG00000133958.13;ENSG00000133958.13;ENSG00000133958.13;ENSG00000133958.13	protein_coding;protein_coding;protein_coding;protein_coding	2;2;2;2	50;50;51;51	UNC79-201;UNC79-201;UNC79-203;UNC79-203	5;5;5;5
14	93707445	exon;three_prime_UTR	93706704;93706905	93707876;93707876	+;+	UNC79;UNC79	ENSG00000133958.13;ENSG00000133958.13	protein_coding;protein_coding	2;2	51;51	UNC79-203;UNC79-203	5;5
14	93896846	exon	93895762	93897759	+	AL132642.2	ENSG00000279593.1	TEC	2	1	AL132642.2-201	NA
14	94079220	exon;CDS;exon;CDS;exon;five_prime_UTR	94079025;94079025;94079025;94079025;94079025;94079025	94079747;94079742;94079621;94079613;94079747;94079747	-;-;-;-;-;-	DDX24;DDX24;DDX24;DDX24;DDX24;DDX24	ENSG00000089737.17;ENSG00000089737.17;ENSG00000089737.17;ENSG00000089737.17;ENSG00000089737.17;ENSG00000089737.17	protein_coding;protein_coding;protein_coding;protein_coding;protein_coding;protein_coding	2;2;1;1;3;3	2;2;2;2;2;2	DDX24-209;DDX24-209;DDX24-205;DDX24-205;DDX24-211;DDX24-211	1;1;5;5;5;5
14	94771114	exon	94770271	94774858	+	AL121612.2	ENSG00000285205.2	lncRNA	2	1	AL121612.2-201	None
14	95087234	exon;three_prime_UTR;exon;three_prime_UTR	95086228;95086228;95086244;95086244	95090663;95090497;95090663;95090497	-;-;-;-	DICER1;DICER1;DICER1;DICER1	ENSG00000100697.15;ENSG00000100697.15;ENSG00000100697.15;ENSG00000100697.15	protein_coding;protein_coding;protein_coding;protein_coding	1;1;1;1	27;27;29;29	DICER1-201;DICER1-201;DICER1-203;DICER1-203	1;1;5;5
14	95095736	exon;three_prime_UTR	95095346;95095346	95096713;95095771	-;-	DICER1;DICER1	ENSG00000100697.15;ENSG00000100697.15	protein_coding;protein_coding	1;1	25;25	DICER1-210;DICER1-210	2;2
14	96325759	exon;CDS	96325649;96325649	96325922;96325922	-;-	ATG2B;ATG2B	ENSG00000066739.12;ENSG00000066739.12	protein_coding;protein_coding	2;2	15;15	ATG2B-202;ATG2B-202	5;5
14	96424043	exon	96423700	96424209	-	PEBP1P1	ENSG00000259059.1	processed_pseudogene	1	1	PEBP1P1-201	NA
14	96488824	exon;three_prime_UTR	96488305;96488344	96489427;96489427	+;+	AK7;AK7	ENSG00000140057.9;ENSG00000140057.9	protein_coding;protein_coding	2;2	18;18	AK7-201;AK7-201	1;1
14	96532032	exon;three_prime_UTR	96531475;96531697	96532248;96532248	+;+	PAPOLA;PAPOLA	ENSG00000090060.18;ENSG00000090060.18	protein_coding;protein_coding	2;2	7;7	PAPOLA-225;PAPOLA-225	1;1
14	99458308	exon;CDS;exon;CDS;exon;three_prime_UTR;exon;CDS	99458279;99458279;99458279;99458279;99458279;99458279;99458279;99458279	99458535;99458535;99458535;99458535;99458535;99458535;99458535;99458535	-;-;-;-;-;-;-;-	SETD3;SETD3;SETD3;SETD3;SETD3;SETD3;SETD3;SETD3	ENSG00000183576.13;ENSG00000183576.13;ENSG00000183576.13;ENSG00000183576.13;ENSG00000183576.13;ENSG00000183576.13;ENSG00000183576.13;ENSG00000183576.13	protein_coding;protein_coding;protein_coding;protein_coding;protein_coding;protein_coding;protein_coding;protein_coding	2;2;2;2;3;3;2;2	6;6;6;6;5;5;6;6	SETD3-202;SETD3-202;SETD3-201;SETD3-201;SETD3-209;SETD3-209;SETD3-204;SETD3-204	1;1;1;1;5;5;1;1
15	100346555	exon	100346524	100349822	-	SPATA41	ENSG00000189419.8	lncRNA	2	1	SPATA41-203	None
15	100573550	exon;three_prime_UTR;exon;three_prime_UTR	100573415;100573415;100573477;100573477	100574241;100573561;100574241;100573561	-;-;-;-	LINS1;LINS1;LINS1;LINS1	ENSG00000140471.17;ENSG00000140471.17;ENSG00000140471.17;ENSG00000140471.17	protein_coding;protein_coding;protein_coding;protein_coding	2;2;2;2	5;5;5;5	LINS1-214;LINS1-214;LINS1-207;LINS1-207	1;1;2;2
15	101176978	exon;three_prime_UTR	101175727;101175727	101178980;101177387	-;-	CHSY1;CHSY1	ENSG00000131873.7;ENSG00000131873.7	protein_coding;protein_coding	2;2	3;3	CHSY1-201;CHSY1-201	1;1
15	101605189	exon	101602786	101606035	-	LINC02348	ENSG00000286733.1	lncRNA	2	3	LINC02348-202	None
15	20534706	exon;CDS	20534259;20534259	20535689;20535689	-;-	GOLGA6L6;GOLGA6L6	ENSG00000277322.1;ENSG00000277322.1	protein_coding;protein_coding	2;2	8;8	GOLGA6L6-201;GOLGA6L6-201	5;5
15	20661755	exon	20660760	20664970	+	AC131280.1	ENSG00000279628.1	TEC	2	1	AC131280.1-202	NA
15	20681171	exon	20681110	20681221	-	NBEAP1	ENSG00000258590.5	transcribed_unprocessed_pseudogene	2	2	NBEAP1-201	NA
15	20961214	exon	20960675	20961581	+	OR11J2P	ENSG00000258855.1	unprocessed_pseudogene	2	1	OR11J2P-201	NA
15	21298340	exon	21298233	21300143	-	AC068446.2	ENSG00000247765.2	lncRNA	2	2	AC068446.2-201	2
15	21543043	exon	21542990	21544008	-	AC183088.1	ENSG00000284788.1	unprocessed_pseudogene	2	1	AC183088.1-201	NA
15	21543064	exon	21542990	21544008	-	AC183088.1	ENSG00000284788.1	unprocessed_pseudogene	2	1	AC183088.1-201	NA
15	22044920	exon	22044476	22045400	+	OR4Q1P	ENSG00000285135.1	transcribed_unprocessed_pseudogene	2	1	OR4Q1P-201	NA
15	24167046	exon	24164777	24168895	-	PWRN2	ENSG00000260551.1	lncRNA	2	2	PWRN2-202	1
15	24547911	exon;exon	24547768;24547768	24547924;24547911	+;+	PWRN1;PWRN1	ENSG00000259905.7;ENSG00000259905.7	lncRNA;lncRNA	2;2	12;9	PWRN1-206;PWRN1-226	3;None
15	24683203	exon;three_prime_UTR	24675775;24679339	24683393;24683393	+;+	NPAP1;NPAP1	ENSG00000185823.5;ENSG00000185823.5	protein_coding;protein_coding	2;2	1;1	NPAP1-201;NPAP1-201	NA;NA
15	24856658	exon;five_prime_UTR	24856551;24856551	24856716;24856716	+;+	SNRPN;SNRPN	ENSG00000128739.23;ENSG00000128739.23	protein_coding;protein_coding	2;2	1;1	SNRPN-203;SNRPN-203	1;1
15	25023461	exon	25020590	25036490	+	SNHG14	ENSG00000224078.15	lncRNA	2	11	SNHG14-213	5
15	25059552	exon;exon;exon;exon;exon;exon;exon	25059457;25059457;25059457;25059552;25059457;25059457;25059538	25059718;25059718;25059718;25059718;25059718;25059718;25059633	+;+;+;+;+;+;+	SNHG14;SNHG14;SNHG14;SNHG14;SNHG14;SNHG14;SNORD116-4	ENSG00000224078.15;ENSG00000224078.15;ENSG00000224078.15;ENSG00000224078.15;ENSG00000224078.15;ENSG00000224078.15;ENSG00000275529.1	lncRNA;lncRNA;lncRNA;lncRNA;lncRNA;lncRNA;snoRNA	2;2;2;2;2;2;3	6;6;7;2;7;4;1	SNHG14-224;SNHG14-291;SNHG14-318;SNHG14-210;SNHG14-234;SNHG14-269;SNORD116-4-201	5;None;None;5;None;None;NA
15	25059575	exon;exon;exon;exon;exon;exon;exon	25059457;25059457;25059457;25059552;25059457;25059457;25059538	25059718;25059718;25059718;25059718;25059718;25059718;25059633	+;+;+;+;+;+;+	SNHG14;SNHG14;SNHG14;SNHG14;SNHG14;SNHG14;SNORD116-4	ENSG00000224078.15;ENSG00000224078.15;ENSG00000224078.15;ENSG00000224078.15;ENSG00000224078.15;ENSG00000224078.15;ENSG00000275529.1	lncRNA;lncRNA;lncRNA;lncRNA;lncRNA;lncRNA;snoRNA	2;2;2;2;2;2;3	6;6;7;2;7;4;1	SNHG14-224;SNHG14-291;SNHG14-318;SNHG14-210;SNHG14-234;SNHG14-269;SNORD116-4-201	5;None;None;5;None;None;NA
15	25865099	exon;five_prime_UTR	25865015;25865015	25865172;25865172	-;-	ATP10A;ATP10A	ENSG00000206190.12;ENSG00000206190.12	protein_coding;protein_coding	3;3	1;1	ATP10A-207;ATP10A-207	5;5
15	26977141	exon;CDS;exon;CDS	26977002;26977002;26977002;26977002	26977150;26977150;26977150;26977150	+;+;+;+	GABRG3;GABRG3;GABRG3;GABRG3	ENSG00000182256.13;ENSG00000182256.13;ENSG00000182256.13;ENSG00000182256.13	protein_coding;protein_coding;protein_coding;protein_coding	2;2;2;2	2;2;2;2	GABRG3-208;GABRG3-208;GABRG3-206;GABRG3-206	1;1;2;2
15	27535304	exon;three_prime_UTR	27532600;27532882	27541984;27541984	+;+	GABRG3;GABRG3	ENSG00000182256.13;ENSG00000182256.13	protein_coding;protein_coding	2;2	10;10	GABRG3-208;GABRG3-208	1;1
15	28684843	exon	28684129	28685264	+	HERC2P9	ENSG00000206149.10	transcribed_unprocessed_pseudogene	2	14	HERC2P9-203	1
15	28843382	exon;CDS	28841833;28842235	28843440;28843440	-;-	GOLGA6L7;GOLGA6L7	ENSG00000261649.6;ENSG00000261649.6	protein_coding;protein_coding	2;2	9;9	GOLGA6L7-201;GOLGA6L7-201	5;5
15	29373730	exon	29373602	29376956	-	AC107980.1	ENSG00000259690.1	lncRNA	2	1	AC107980.1-201	NA
15	29610479	exon	29609676	29611212	-	AC102941.1	ENSG00000259814.1	lncRNA	2	1	AC102941.1-201	NA
15	30072721	exon;exon	30072620;30072620	30073064;30072958	-;-	AC111152.1;AC111152.1	ENSG00000229389.2;ENSG00000229389.2	transcribed_unprocessed_pseudogene;transcribed_unprocessed_pseudogene	2;2	1;1	AC111152.1-201;AC111152.1-202	3;NA
15	30210650	exon	30210417	30214540	+	LINC02249	ENSG00000225930.4	lncRNA	2	3	LINC02249-202	1
15	31219494	exon	31219289	31220945	+	LINC02352	ENSG00000259448.3	lncRNA	2	2	LINC02352-203	None
15	32586128	exon;exon	32585524;32586105	32586260;32586260	-;-	AC123768.2;AC123768.2	ENSG00000262728.6;ENSG00000262728.6	lncRNA;lncRNA	2;2	2;3	AC123768.2-201;AC123768.2-202	None;3
15	32738083	exon;three_prime_UTR	32730690;32731246	32745106;32745106	+;+	GREM1;GREM1	ENSG00000166923.12;ENSG00000166923.12	protein_coding;protein_coding	2;2	2;2	GREM1-203;GREM1-203	None;None
15	32743513	exon;three_prime_UTR	32730690;32731246	32745106;32745106	+;+	GREM1;GREM1	ENSG00000166923.12;ENSG00000166923.12	protein_coding;protein_coding	2;2	2;2	GREM1-203;GREM1-203	None;None
15	32767854	exon;three_prime_UTR;exon;three_prime_UTR	32765544;32765544;32765546;32765546	32774354;32774309;32774354;32774309	-;-;-;-	FMN1;FMN1;FMN1;FMN1	ENSG00000248905.10;ENSG00000248905.10;ENSG00000248905.10;ENSG00000248905.10	protein_coding;protein_coding;protein_coding;protein_coding	2;2;2;2	21;21;17;17	FMN1-211;FMN1-211;FMN1-202;FMN1-202	5;5;1;1
15	32769805	exon;three_prime_UTR;exon;three_prime_UTR	32765544;32765544;32765546;32765546	32774354;32774309;32774354;32774309	-;-;-;-	FMN1;FMN1;FMN1;FMN1	ENSG00000248905.10;ENSG00000248905.10;ENSG00000248905.10;ENSG00000248905.10	protein_coding;protein_coding;protein_coding;protein_coding	2;2;2;2	21;21;17;17	FMN1-211;FMN1-211;FMN1-202;FMN1-202	5;5;1;1
15	33235575	exon	33235552	33236998	-	TMCO5B	ENSG00000215296.10	transcribed_unitary_pseudogene	2	3	TMCO5B-204	2
15	33235582	exon	33235552	33236998	-	TMCO5B	ENSG00000215296.10	transcribed_unitary_pseudogene	2	3	TMCO5B-204	2
15	33866098	exon;three_prime_UTR;exon;three_prime_UTR;exon;three_prime_UTR;exon;three_prime_UTR	33865131;33865227;33865131;33865227;33865131;33865227;33865131;33865227	33866101;33866101;33866102;33866102;33866098;33866098;33866098;33866098	+;+;+;+;+;+;+;+	RYR3;RYR3;RYR3;RYR3;RYR3;RYR3;RYR3;RYR3	ENSG00000198838.14;ENSG00000198838.14;ENSG00000198838.14;ENSG00000198838.14;ENSG00000198838.14;ENSG00000198838.14;ENSG00000198838.14;ENSG00000198838.14	protein_coding;protein_coding;protein_coding;protein_coding;protein_coding;protein_coding;protein_coding;protein_coding	2;2;2;2;2;2;3;3	103;103;104;104;104;104;105;105	RYR3-202;RYR3-202;RYR3-212;RYR3-212;RYR3-201;RYR3-201;RYR3-208;RYR3-208	2;2;1;1;5;5;5;5
15	34105884	exon;three_prime_UTR	34102083;34104290	34108686;34108686	+;+	PGBD4;PGBD4	ENSG00000182405.6;ENSG00000182405.6	protein_coding;protein_coding	1;1	1;1	PGBD4-201;PGBD4-201	NA;NA
15	34106981	exon;three_prime_UTR	34102083;34104290	34108686;34108686	+;+	PGBD4;PGBD4	ENSG00000182405.6;ENSG00000182405.6	protein_coding;protein_coding	1;1	1;1	PGBD4-201;PGBD4-201	NA;NA
15	34229862	exon;three_prime_UTR;exon;three_prime_UTR;exon;three_prime_UTR;exon;three_prime_UTR	34229753;34229848;34229753;34229789;34229753;34229789;34229784;34229784	34230147;34230147;34230156;34230156;34229999;34229999;34233972;34233880	+;+;+;+;+;+;-;-	EMC4;EMC4;EMC4;EMC4;EMC4;EMC4;SLC12A6;SLC12A6	ENSG00000128463.13;ENSG00000128463.13;ENSG00000128463.13;ENSG00000128463.13;ENSG00000128463.13;ENSG00000128463.13;ENSG00000140199.13;ENSG00000140199.13	protein_coding;protein_coding;protein_coding;protein_coding;protein_coding;protein_coding;protein_coding;protein_coding	2;2;2;2;1;1;1;1	4;4;5;5;3;3;26;26	EMC4-201;EMC4-201;EMC4-202;EMC4-202;EMC4-209;EMC4-209;SLC12A6-202;SLC12A6-202	1;1;1;1;2;2;1;1
15	34979935	exon;three_prime_UTR;exon	34978341;34978341;34978351	34983490;34981358;34980084	-;-;+	ZNF770;ZNF770;AC114546.3	ENSG00000198146.4;ENSG00000198146.4;ENSG00000279364.1	protein_coding;protein_coding;TEC	2;2;2	3;3;1	ZNF770-201;ZNF770-201;AC114546.3-201	1;1;NA
15	35083635	exon;three_prime_UTR	35083410;35083410	35085295;35084192	-;-	NANOGP8;NANOGP8	ENSG00000255192.6;ENSG00000255192.6	protein_coding;protein_coding	2;2	1;1	NANOGP8-201;NANOGP8-201	NA;NA
15	35520241	exon;three_prime_UTR	35518994;35518994	35522278;35522092	-;-	DPH6;DPH6	ENSG00000134146.12;ENSG00000134146.12	protein_coding;protein_coding	2;2	4;4	DPH6-202;DPH6-202	1;1
15	35520254	exon;three_prime_UTR	35518994;35518994	35522278;35522092	-;-	DPH6;DPH6	ENSG00000134146.12;ENSG00000134146.12	protein_coding;protein_coding	2;2	4;4	DPH6-202;DPH6-202	1;1
15	35521631	exon;three_prime_UTR	35518994;35518994	35522278;35522092	-;-	DPH6;DPH6	ENSG00000134146.12;ENSG00000134146.12	protein_coding;protein_coding	2;2	4;4	DPH6-202;DPH6-202	1;1
15	36443539	exon	36443537	36443833	-	AC087516.2	ENSG00000259737.7	lncRNA	2	4	AC087516.2-203	3
15	38504321	exon	38502853	38504981	+	AC116158.1	ENSG00000259326.1	lncRNA	2	1	AC116158.1-201	NA
15	38672675	exon	38672618	38672757	+	LINC02694	ENSG00000175779.4	lncRNA	2	2	LINC02694-201	3
15	39829110	exon;CDS	39829081;39829081	39829276;39829117	-;-	GPR176;GPR176	ENSG00000166073.11;ENSG00000166073.11	protein_coding;protein_coding	2;2	1;1	GPR176-202;GPR176-202	2;2
15	39925852	exon	39921070	39925880	+	GPR176-DT	ENSG00000246863.2	lncRNA	2	1	GPR176-DT-202	NA
15	39975155	exon;three_prime_UTR	39973592;39973783	39975429;39975429	+;+	EIF2AK4;EIF2AK4	ENSG00000128829.12;ENSG00000128829.12	protein_coding;protein_coding	2;2	11;11	EIF2AK4-208;EIF2AK4-208	1;1
15	40374015	three_prime_UTR;exon	40370319;40367058	40378621;40378621	+;+	DISP2;DISP2	ENSG00000140323.6;ENSG00000140323.6	protein_coding;protein_coding	2;2	8;8	DISP2-201;DISP2-201	1;1
15	40374571	three_prime_UTR;exon	40370319;40367058	40378621;40378621	+;+	DISP2;DISP2	ENSG00000140323.6;ENSG00000140323.6	protein_coding;protein_coding	2;2	8;8	DISP2-201;DISP2-201	1;1
15	40553931	exon;three_prime_UTR;exon;three_prime_UTR	40553099;40553099;40553104;40553104	40554127;40553970;40554127;40553970	-;-;-;-	CCDC32;CCDC32;CCDC32;CCDC32	ENSG00000128891.15;ENSG00000128891.15;ENSG00000128891.15;ENSG00000128891.15	protein_coding;protein_coding;protein_coding;protein_coding	2;2;2;2	4;4;4;4	CCDC32-201;CCDC32-201;CCDC32-202;CCDC32-202	2;2;1;1
15	40663473	exon;three_prime_UTR;exon;three_prime_UTR	40662074;40662189;40662074;40662189	40664342;40664342;40664342;40664342	+;+;+;+	KNL1;KNL1;KNL1;KNL1	ENSG00000137812.20;ENSG00000137812.20;ENSG00000137812.20;ENSG00000137812.20	protein_coding;protein_coding;protein_coding;protein_coding	2;2;2;2	27;27;26;26	KNL1-201;KNL1-201;KNL1-202;KNL1-202	1;1;1;1
15	40755437	exon;five_prime_UTR	40754597;40754784	40755851;40755851	-;-	RMDN3;RMDN3	ENSG00000137824.16;ENSG00000137824.16	protein_coding;protein_coding	2;2	1;1	RMDN3-201;RMDN3-201	1;1
15	41301970	exon	41298041	41306534	+	OIP5-AS1	ENSG00000247556.6	lncRNA	2	4	OIP5-AS1-201	1
15	41302077	exon	41298041	41306534	+	OIP5-AS1	ENSG00000247556.6	lncRNA	2	4	OIP5-AS1-201	1
15	41305846	exon	41298041	41306534	+	OIP5-AS1	ENSG00000247556.6	lncRNA	2	4	OIP5-AS1-201	1
15	41309122	exon	41308720	41309737	+	OIP5-AS1	ENSG00000247556.6	lncRNA	2	5	OIP5-AS1-202	2
15	41380255	exon;three_prime_UTR;exon;three_prime_UTR;exon;three_prime_UTR;exon;three_prime_UTR;exon;three_prime_UTR;exon;three_prime_UTR;exon;three_prime_UTR;exon;three_prime_UTR	41380093;41380187;41380093;41380187;41380093;41380187;41380093;41380187;41380093;41380187;41380093;41380187;41380093;41380187;41380093;41380187	41380996;41380996;41381021;41381021;41381050;41381050;41380263;41380263;41381050;41381050;41381046;41381046;41381050;41381050;41381050;41381050	+;+;+;+;+;+;+;+;+;+;+;+;+;+;+;+	AC087721.2;AC087721.2;NUSAP1;NUSAP1;NUSAP1;NUSAP1;NUSAP1;NUSAP1;NUSAP1;NUSAP1;NUSAP1;NUSAP1;NUSAP1;NUSAP1;NUSAP1;NUSAP1	ENSG00000285920.2;ENSG00000285920.2;ENSG00000137804.14;ENSG00000137804.14;ENSG00000137804.14;ENSG00000137804.14;ENSG00000137804.14;ENSG00000137804.14;ENSG00000137804.14;ENSG00000137804.14;ENSG00000137804.14;ENSG00000137804.14;ENSG00000137804.14;ENSG00000137804.14;ENSG00000137804.14;ENSG00000137804.14	protein_coding;protein_coding;protein_coding;protein_coding;protein_coding;protein_coding;protein_coding;protein_coding;protein_coding;protein_coding;protein_coding;protein_coding;protein_coding;protein_coding;protein_coding;protein_coding	2;2;2;2;2;2;1;1;2;2;2;2;2;2;2;2	12;12;12;12;11;11;9;9;11;11;11;11;11;11;11;11	AC087721.2-203;AC087721.2-203;NUSAP1-214;NUSAP1-214;NUSAP1-201;NUSAP1-201;NUSAP1-203;NUSAP1-203;NUSAP1-202;NUSAP1-202;NUSAP1-208;NUSAP1-208;NUSAP1-212;NUSAP1-212;NUSAP1-210;NUSAP1-210	None;None;None;None;1;1;2;2;1;1;1;1;1;1;1;1
15	41771406	exon;three_prime_UTR	41766004;41767281	41773081;41773081	+;+	MGA;MGA	ENSG00000174197.16;ENSG00000174197.16	protein_coding;protein_coding	2;2	22;22	MGA-207;MGA-207	1;1
15	41898152	exon;three_prime_UTR	41895933;41895933	41901181;41900644	-;-	EHD4;EHD4	ENSG00000103966.11;ENSG00000103966.11	protein_coding;protein_coding	2;2	6;6	EHD4-201;EHD4-201	1;1
15	41898853	exon;exon;exon;three_prime_UTR	41898167;41898167;41895933;41895933	41899528;41899528;41901181;41900644	+;+;-;-	AC020659.1;AC020659.1;EHD4;EHD4	ENSG00000174171.6;ENSG00000174171.6;ENSG00000103966.11;ENSG00000103966.11	lncRNA;lncRNA;protein_coding;protein_coding	2;2;2;2	4;3;6;6	AC020659.1-205;AC020659.1-211;EHD4-201;EHD4-201	None;None;1;1
15	42264098	exon;CDS;exon;CDS;exon;CDS;exon;five_prime_UTR	42264090;42264090;42264090;42264090;42264090;42264090;42264090;42264090	42264203;42264203;42264203;42264203;42264203;42264203;42264203;42264203	-;-;-;-;-;-;-;-	TMEM87A;TMEM87A;TMEM87A;TMEM87A;TMEM87A;TMEM87A;TMEM87A;TMEM87A	ENSG00000103978.16;ENSG00000103978.16;ENSG00000103978.16;ENSG00000103978.16;ENSG00000103978.16;ENSG00000103978.16;ENSG00000103978.16;ENSG00000103978.16	protein_coding;protein_coding;protein_coding;protein_coding;protein_coding;protein_coding;protein_coding;protein_coding	2;2;3;3;2;2;2;2	4;4;3;3;4;4;4;4	TMEM87A-202;TMEM87A-202;TMEM87A-203;TMEM87A-203;TMEM87A-201;TMEM87A-201;TMEM87A-212;TMEM87A-212	2;2;1;1;1;1;3;3
15	42457295	exon;five_prime_UTR;exon;five_prime_UTR	42456958;42457206;42457217;42457217	42457532;42457532;42457513;42457513	-;-;-;-	ZNF106;ZNF106;ZNF106;ZNF106	ENSG00000103994.17;ENSG00000103994.17;ENSG00000103994.17;ENSG00000103994.17	protein_coding;protein_coding;protein_coding;protein_coding	2;2;1;1	1;1;1;1	ZNF106-201;ZNF106-201;ZNF106-205;ZNF106-205	1;1;1;1
15	42457444	exon;five_prime_UTR;exon;five_prime_UTR	42456958;42457206;42457217;42457217	42457532;42457532;42457513;42457513	-;-;-;-	ZNF106;ZNF106;ZNF106;ZNF106	ENSG00000103994.17;ENSG00000103994.17;ENSG00000103994.17;ENSG00000103994.17	protein_coding;protein_coding;protein_coding;protein_coding	2;2;1;1	1;1;1;1	ZNF106-201;ZNF106-201;ZNF106-205;ZNF106-205	1;1;1;1
15	42540339	exon;three_prime_UTR;exon;three_prime_UTR	42537820;42537820;42537829;42537829	42544124;42544082;42544124;42544082	-;-;-;-	LRRC57;LRRC57;LRRC57;LRRC57	ENSG00000180979.10;ENSG00000180979.10;ENSG00000180979.10;ENSG00000180979.10	protein_coding;protein_coding;protein_coding;protein_coding	2;2;2;2	5;5;6;6	LRRC57-201;LRRC57-201;LRRC57-202;LRRC57-202	1;1;1;1
15	42581342	exon	42581156	42581488	-	EIF4EBP2P2	ENSG00000260282.1	processed_pseudogene	1	1	EIF4EBP2P2-201	NA
15	42688258	exon;CDS	42684116;42684116	42694342;42694342	+;+	STARD9;STARD9	ENSG00000159433.12;ENSG00000159433.12	protein_coding;protein_coding	2;2	23;23	STARD9-201;STARD9-201	5;5
15	42720837	exon;three_prime_UTR	42719473;42719575	42720998;42720998	+;+	STARD9;STARD9	ENSG00000159433.12;ENSG00000159433.12	protein_coding;protein_coding	2;2	33;33	STARD9-201;STARD9-201	5;5
15	42724054	exon;three_prime_UTR	42723544;42723544	42724616;42724490	-;-	CDAN1;CDAN1	ENSG00000140326.13;ENSG00000140326.13	protein_coding;protein_coding	2;2	28;28	CDAN1-201;CDAN1-201	1;1
15	43131498	exon	43131008	43131686	+	SPCS2P1	ENSG00000260928.2	processed_pseudogene	1	1	SPCS2P1-201	NA
15	43801545	exon;CDS;exon;CDS;exon;CDS	43801518;43801518;43801518;43801518;43801518;43801518	43801569;43801569;43801569;43801569;43804427;43801580	+;+;+;+;+;+	HYPK;HYPK;HYPK;HYPK;HYPK;HYPK	ENSG00000242028.8;ENSG00000242028.8;ENSG00000242028.8;ENSG00000242028.8;ENSG00000242028.8;ENSG00000242028.8	protein_coding;protein_coding;protein_coding;protein_coding;protein_coding;protein_coding	2;2;2;2;2;2	4;4;3;3;2;2	HYPK-201;HYPK-201;HYPK-202;HYPK-202;HYPK-203;HYPK-203	2;2;1;1;2;2
15	43872846	exon;three_prime_UTR;exon;three_prime_UTR;exon;three_prime_UTR	43870761;43870761;43870764;43870764;43870767;43870767	43874462;43873884;43874462;43873884;43873222;43873147	-;-;-;-;-;-	FRMD5;FRMD5;FRMD5;FRMD5;FRMD5;FRMD5	ENSG00000171877.21;ENSG00000171877.21;ENSG00000171877.21;ENSG00000171877.21;ENSG00000171877.21;ENSG00000171877.21	protein_coding;protein_coding;protein_coding;protein_coding;protein_coding;protein_coding	3;3;2;2;1;1	14;14;14;14;15;15	FRMD5-211;FRMD5-211;FRMD5-202;FRMD5-202;FRMD5-201;FRMD5-201	5;5;1;1;5;5
15	43873551	exon;three_prime_UTR;exon;three_prime_UTR;exon;three_prime_UTR	43870761;43870761;43870764;43870764;43873275;43873275	43874462;43873884;43874462;43873884;43873939;43873891	-;-;-;-;-;-	FRMD5;FRMD5;FRMD5;FRMD5;FRMD5;FRMD5	ENSG00000171877.21;ENSG00000171877.21;ENSG00000171877.21;ENSG00000171877.21;ENSG00000171877.21;ENSG00000171877.21	protein_coding;protein_coding;protein_coding;protein_coding;protein_coding;protein_coding	3;3;2;2;2;2	14;14;14;14;16;16	FRMD5-211;FRMD5-211;FRMD5-202;FRMD5-202;FRMD5-209;FRMD5-209	5;5;1;1;2;2
15	44415096	exon;three_prime_UTR;exon;three_prime_UTR;exon;three_prime_UTR	44413336;44413407;44413336;44413407;44413336;44413407	44415758;44415758;44415729;44415729;44415757;44415757	+;+;+;+;+;+	GOLM2;GOLM2;GOLM2;GOLM2;GOLM2;GOLM2	ENSG00000166734.20;ENSG00000166734.20;ENSG00000166734.20;ENSG00000166734.20;ENSG00000166734.20;ENSG00000166734.20	protein_coding;protein_coding;protein_coding;protein_coding;protein_coding;protein_coding	2;2;2;2;2;2	10;10;12;12;9;9	GOLM2-201;GOLM2-201;GOLM2-212;GOLM2-212;GOLM2-202;GOLM2-202	1;1;None;None;1;1
15	44525960	exon;three_prime_UTR;exon;three_prime_UTR	44524109;44524175;44524109;44524175	44529038;44529038;44527232;44527232	+;+;+;+	CTDSPL2;CTDSPL2;CTDSPL2;CTDSPL2	ENSG00000137770.14;ENSG00000137770.14;ENSG00000137770.14;ENSG00000137770.14	protein_coding;protein_coding;protein_coding;protein_coding	2;2;2;2	13;13;11;11	CTDSPL2-201;CTDSPL2-201;CTDSPL2-202;CTDSPL2-202	1;1;1;1
15	44978764	exon;three_prime_UTR	44978489;44978629	44979229;44979229	+;+	TERB2;TERB2	ENSG00000167014.11;ENSG00000167014.11	protein_coding;protein_coding	2;2	7;7	TERB2-201;TERB2-201	1;1
15	45277725	exon;three_prime_UTR	45275396;45275514	45277846;45277846	+;+	SLC28A2;SLC28A2	ENSG00000137860.12;ENSG00000137860.12	protein_coding;protein_coding	2;2	18;18	SLC28A2-201;SLC28A2-201	1;1
15	45605475	exon;CDS;exon;CDS;exon;CDS;exon;CDS;exon;CDS;exon;CDS;exon;CDS	45605428;45605428;45605428;45605428;45605428;45605428;45605428;45605428;45605428;45605428;45605428;45605428;45605428;45605428	45605514;45605514;45605514;45605514;45605514;45605514;45605514;45605514;45605514;45605514;45605514;45605514;45605514;45605514	+;+;+;+;+;+;+;+;+;+;+;+;+;+	BLOC1S6;BLOC1S6;BLOC1S6;BLOC1S6;BLOC1S6;BLOC1S6;BLOC1S6;BLOC1S6;BLOC1S6;BLOC1S6;BLOC1S6;BLOC1S6;BLOC1S6;BLOC1S6	ENSG00000104164.12;ENSG00000104164.12;ENSG00000104164.12;ENSG00000104164.12;ENSG00000104164.12;ENSG00000104164.12;ENSG00000104164.12;ENSG00000104164.12;ENSG00000104164.12;ENSG00000104164.12;ENSG00000104164.12;ENSG00000104164.12;ENSG00000104164.12;ENSG00000104164.12	protein_coding;protein_coding;protein_coding;protein_coding;protein_coding;protein_coding;protein_coding;protein_coding;protein_coding;protein_coding;protein_coding;protein_coding;protein_coding;protein_coding	2;2;2;2;2;2;2;2;2;2;1;1;2;2	3;3;4;4;4;4;4;4;4;4;5;5;4;4	BLOC1S6-214;BLOC1S6-214;BLOC1S6-202;BLOC1S6-202;BLOC1S6-201;BLOC1S6-201;BLOC1S6-207;BLOC1S6-207;BLOC1S6-208;BLOC1S6-208;BLOC1S6-218;BLOC1S6-218;BLOC1S6-209;BLOC1S6-209	2;2;4;4;1;1;3;3;2;2;2;2;4;4
15	45607050	exon;three_prime_UTR;exon;three_prime_UTR;exon;three_prime_UTR	45606395;45606515;45606395;45606515;45606395;45606515	45609708;45609708;45609708;45609708;45609710;45609710	+;+;+;+;+;+	BLOC1S6;BLOC1S6;BLOC1S6;BLOC1S6;BLOC1S6;BLOC1S6	ENSG00000104164.12;ENSG00000104164.12;ENSG00000104164.12;ENSG00000104164.12;ENSG00000104164.12;ENSG00000104164.12	protein_coding;protein_coding;protein_coding;protein_coding;protein_coding;protein_coding	2;2;2;2;1;1	5;5;5;5;6;6	BLOC1S6-201;BLOC1S6-201;BLOC1S6-208;BLOC1S6-208;BLOC1S6-218;BLOC1S6-218	1;1;2;2;2;2
15	48331089	exon;five_prime_UTR	48331011;48331011	48331191;48331166	+;+	DUT;DUT	ENSG00000128951.14;ENSG00000128951.14	protein_coding;protein_coding	2;2	1;1	DUT-210;DUT-210	3;3
15	48409559	exon;three_prime_UTR	48408313;48408313	48411379;48410989	-;-	FBN1;FBN1	ENSG00000166147.14;ENSG00000166147.14	protein_coding;protein_coding	2;2	66;66	FBN1-201;FBN1-201	1;1
15	48879625	exon;three_prime_UTR	48878134;48878741	48880173;48880173	+;+	EID1;EID1	ENSG00000255302.5;ENSG00000255302.5	protein_coding;protein_coding	2;2	1;1	EID1-201;EID1-201	NA;NA
15	48879962	exon;three_prime_UTR	48878134;48878741	48880173;48880173	+;+	EID1;EID1	ENSG00000255302.5;ENSG00000255302.5	protein_coding;protein_coding	2;2	1;1	EID1-201;EID1-201	NA;NA
15	49508236	exon;CDS;exon;CDS	49508211;49508211;49508211;49508211	49508348;49508348;49508348;49508348	-;-;-;-	FAM227B;FAM227B;FAM227B;FAM227B	ENSG00000166262.16;ENSG00000166262.16;ENSG00000166262.16;ENSG00000166262.16	protein_coding;protein_coding;protein_coding;protein_coding	2;2;2;2	11;11;10;10	FAM227B-201;FAM227B-201;FAM227B-212;FAM227B-212	2;2;1;1
15	49588046	exon;CDS;exon;CDS;exon;CDS;exon;CDS	49588016;49588016;49588016;49588016;49588016;49588016;49588016;49588016	49588083;49588083;49588083;49588083;49588083;49588083;49588083;49588083	-;-;-;-;-;-;-;-	FAM227B;FAM227B;FAM227B;FAM227B;FAM227B;FAM227B;FAM227B;FAM227B	ENSG00000166262.16;ENSG00000166262.16;ENSG00000166262.16;ENSG00000166262.16;ENSG00000166262.16;ENSG00000166262.16;ENSG00000166262.16;ENSG00000166262.16	protein_coding;protein_coding;protein_coding;protein_coding;protein_coding;protein_coding;protein_coding;protein_coding	2;2;2;2;2;2;2;2	5;5;5;5;6;6;5;5	FAM227B-201;FAM227B-201;FAM227B-212;FAM227B-212;FAM227B-204;FAM227B-204;FAM227B-210;FAM227B-210	2;2;1;1;5;5;3;3
15	49656117	three_prime_UTR;three_prime_UTR;exon;exon	49643579;49643579;49643331;49643331	49656232;49656232;49656232;49656232	+;+;+;+	DTWD1;DTWD1;DTWD1;DTWD1	ENSG00000104047.15;ENSG00000104047.15;ENSG00000104047.15;ENSG00000104047.15	protein_coding;protein_coding;protein_coding;protein_coding	2;2;2;2	5;6;5;6	DTWD1-202;DTWD1-201;DTWD1-202;DTWD1-201	1;1;1;1
15	50277211	exon;three_prime_UTR	50275392;50275392	50278784;50278631	-;-	GABPB1;GABPB1	ENSG00000104064.17;ENSG00000104064.17	protein_coding;protein_coding	2;2	9;9	GABPB1-203;GABPB1-203	1;1
15	50277668	exon;three_prime_UTR;exon;three_prime_UTR	50275392;50275392;50277263;50277263	50278784;50278631;50278784;50278631	-;-;-;-	GABPB1;GABPB1;GABPB1;GABPB1	ENSG00000104064.17;ENSG00000104064.17;ENSG00000104064.17;ENSG00000104064.17	protein_coding;protein_coding;protein_coding;protein_coding	2;2;2;2	9;9;9;9	GABPB1-203;GABPB1-203;GABPB1-201;GABPB1-201	1;1;1;1
15	50364517	exon	50356100	50372202	+	GABPB1-AS1	ENSG00000244879.8	lncRNA	2	2	GABPB1-AS1-202	1
15	50500106	exon;three_prime_UTR;exon;three_prime_UTR	50498903;50499089;50498903;50499089	50514419;50514419;50514421;50514421	+;+;+;+	USP8;USP8;USP8;USP8	ENSG00000138592.14;ENSG00000138592.14;ENSG00000138592.14;ENSG00000138592.14	protein_coding;protein_coding;protein_coding;protein_coding	2;2;2;2	20;20;20;20	USP8-202;USP8-202;USP8-201;USP8-201	1;1;1;1
15	50500487	exon;three_prime_UTR;exon;three_prime_UTR	50498903;50499089;50498903;50499089	50514419;50514419;50514421;50514421	+;+;+;+	USP8;USP8;USP8;USP8	ENSG00000138592.14;ENSG00000138592.14;ENSG00000138592.14;ENSG00000138592.14	protein_coding;protein_coding;protein_coding;protein_coding	2;2;2;2	20;20;20;20	USP8-202;USP8-202;USP8-201;USP8-201	1;1;1;1
15	50513538	exon;three_prime_UTR;exon;three_prime_UTR	50498903;50499089;50498903;50499089	50514419;50514419;50514421;50514421	+;+;+;+	USP8;USP8;USP8;USP8	ENSG00000138592.14;ENSG00000138592.14;ENSG00000138592.14;ENSG00000138592.14	protein_coding;protein_coding;protein_coding;protein_coding	2;2;2;2	20;20;20;20	USP8-202;USP8-202;USP8-201;USP8-201	1;1;1;1
15	51210210	exon;three_prime_UTR;exon;three_prime_UTR	51208057;51208057;51210181;51210181	51211056;51210807;51211056;51210807	-;-;-;-	CYP19A1;CYP19A1;CYP19A1;CYP19A1	ENSG00000137869.15;ENSG00000137869.15;ENSG00000137869.15;ENSG00000137869.15	protein_coding;protein_coding;protein_coding;protein_coding	2;2;2;2	10;10;11;11	CYP19A1-201;CYP19A1-201;CYP19A1-202;CYP19A1-202	1;1;2;2
15	51514511	exon;CDS;exon;CDS;exon;CDS;exon;CDS	51514442;51514442;51514442;51514442;51514442;51514442;51514442;51514442	51514559;51514559;51514559;51514559;51514559;51514559;51514559;51514559	-;-;-;-;-;-;-;-	DMXL2;DMXL2;DMXL2;DMXL2;DMXL2;DMXL2;DMXL2;DMXL2	ENSG00000104093.14;ENSG00000104093.14;ENSG00000104093.14;ENSG00000104093.14;ENSG00000104093.14;ENSG00000104093.14;ENSG00000104093.14;ENSG00000104093.14	protein_coding;protein_coding;protein_coding;protein_coding;protein_coding;protein_coding;protein_coding;protein_coding	2;2;2;2;2;2;2;2	15;15;15;15;15;15;15;15	DMXL2-201;DMXL2-201;DMXL2-203;DMXL2-203;DMXL2-213;DMXL2-213;DMXL2-202;DMXL2-202	1;1;1;1;1;1;1;1
15	51622743	exon;five_prime_UTR;exon;five_prime_UTR	51622459;51622546;51622459;51622546	51622833;51622833;51622771;51622771	-;-;-;-	DMXL2;DMXL2;DMXL2;DMXL2	ENSG00000104093.14;ENSG00000104093.14;ENSG00000104093.14;ENSG00000104093.14	protein_coding;protein_coding;protein_coding;protein_coding	2;2;2;2	1;1;1;1	DMXL2-201;DMXL2-201;DMXL2-213;DMXL2-213	1;1;1;1
15	51809795	exon;three_prime_UTR;exon;three_prime_UTR	51808420;51808455;51808420;51808455	51810131;51810131;51816363;51816363	+;+;+;+	TMOD2;TMOD2;TMOD2;TMOD2	ENSG00000128872.10;ENSG00000128872.10;ENSG00000128872.10;ENSG00000128872.10	protein_coding;protein_coding;protein_coding;protein_coding	2;2;2;2	11;11;10;10	TMOD2-203;TMOD2-203;TMOD2-201;TMOD2-201	2;2;1;1
15	51910754	exon;three_prime_UTR	51908776;51908811	51915725;51915725	+;+	TMOD3;TMOD3	ENSG00000138594.14;ENSG00000138594.14	protein_coding;protein_coding	2;2	10;10	TMOD3-201;TMOD3-201	1;1
15	52937575	exon	52937139	52938518	-	EEF1A1P22	ENSG00000259612.1	processed_pseudogene	1	1	EEF1A1P22-201	NA
15	54628098	exon;three_prime_UTR;exon;three_prime_UTR	54626828;54627114;54626828;54627114	54628707;54628707;54633414;54633414	+;+;+;+	UNC13C;UNC13C;UNC13C;UNC13C	ENSG00000137766.17;ENSG00000137766.17;ENSG00000137766.17;ENSG00000137766.17	protein_coding;protein_coding;protein_coding;protein_coding	2;2;2;2	32;32;32;32	UNC13C-206;UNC13C-206;UNC13C-201;UNC13C-201	None;None;5;5
15	54630332	exon;three_prime_UTR	54626828;54627114	54633414;54633414	+;+	UNC13C;UNC13C	ENSG00000137766.17;ENSG00000137766.17	protein_coding;protein_coding	2;2	32;32	UNC13C-201;UNC13C-201	5;5
15	55173102	exon	55171378	55176739	-	AC011912.1	ENSG00000279145.2	lncRNA	2	1	AC011912.1-201	1
15	55545728	exon;three_prime_UTR;exon;three_prime_UTR	55544687;55544687;55538890;55538890	55547147;55546022;55547147;55546022	-;-;-;-	PYGO1;PYGO1;PYGO1;PYGO1	ENSG00000171016.12;ENSG00000171016.12;ENSG00000171016.12;ENSG00000171016.12	protein_coding;protein_coding;protein_coding;protein_coding	2;2;2;2	3;3;3;3	PYGO1-202;PYGO1-202;PYGO1-201;PYGO1-201	5;5;1;1
15	56193042	exon	56192353	56193262	-	AC084783.1	ENSG00000261072.2	processed_pseudogene	1	1	AC084783.1-201	NA
15	56434217	exon;CDS	56434138;56434138	56434395;56434395	-;-	MNS1;MNS1	ENSG00000138587.6;ENSG00000138587.6	protein_coding;protein_coding	2;2	8;8	MNS1-201;MNS1-201	1;1
15	56628845	exon;exon	56628804;56628804	56628891;56628891	-;-	AC090518.1;AC090518.1	ENSG00000260392.6;ENSG00000260392.6	lncRNA;lncRNA	2;2	2;3	AC090518.1-201;AC090518.1-202	1;4
15	56700596	exon;three_prime_UTR	56697763;56697763	56701072;56700836	-;-	ZNF280D;ZNF280D	ENSG00000137871.20;ENSG00000137871.20	protein_coding;protein_coding	2;2	6;6	ZNF280D-204;ZNF280D-204	1;1
15	57954615	exon;three_prime_UTR;exon;three_prime_UTR;exon;three_prime_UTR	57953424;57953424;57953429;57953429;57953431;57953431	57955269;57955196;57955269;57955196;57955269;57955196	-;-;-;-;-;-	ALDH1A2;ALDH1A2;ALDH1A2;ALDH1A2;ALDH1A2;ALDH1A2	ENSG00000128918.15;ENSG00000128918.15;ENSG00000128918.15;ENSG00000128918.15;ENSG00000128918.15;ENSG00000128918.15	protein_coding;protein_coding;protein_coding;protein_coding;protein_coding;protein_coding	3;3;2;2;2;2	14;14;13;13;12;12	ALDH1A2-204;ALDH1A2-204;ALDH1A2-201;ALDH1A2-201;ALDH1A2-202;ALDH1A2-202	2;2;1;1;1;1
15	58185408	exon;three_prime_UTR;exon;three_prime_UTR	58183961;58184136;58184487;58184487	58185911;58185911;58185911;58185911	+;+;+;+	AQP9;AQP9;AQP9;AQP9	ENSG00000103569.10;ENSG00000103569.10;ENSG00000103569.10;ENSG00000103569.10	protein_coding;protein_coding;protein_coding;protein_coding	2;2;3;3	6;6;7;7	AQP9-201;AQP9-201;AQP9-202;AQP9-202	1;1;1;1
15	58565930	exon;three_prime_UTR	58565179;58565291	58566471;58566471	+;+	LIPC;LIPC	ENSG00000166035.11;ENSG00000166035.11	protein_coding;protein_coding	1;1	10;10	LIPC-203;LIPC-203	1;1
15	58672786	exon	58672296	58672933	+	HMGB1P51	ENSG00000270986.1	processed_pseudogene	1	1	HMGB1P51-201	NA
15	58859065	exon;three_prime_UTR	58854482;58854611	58861900;58861900	+;+	MINDY2;MINDY2	ENSG00000128923.11;ENSG00000128923.11	protein_coding;protein_coding	2;2	9;9	MINDY2-203;MINDY2-203	2;2
15	59688519	exon	59688517	59688576	+	AC092755.2	ENSG00000259238.1	lncRNA	2	1	AC092755.2-201	3
15	60420998	exon;three_prime_UTR	60419609;60419609	60423762;60423633	-;-	ICE2;ICE2	ENSG00000128915.12;ENSG00000128915.12	protein_coding;protein_coding	2;2	16;16	ICE2-201;ICE2-201	1;1
15	60494883	exon;three_prime_UTR	60488284;60488284	60497619;60497454	-;-	RORA;RORA	ENSG00000069667.16;ENSG00000069667.16	protein_coding;protein_coding	2;2	11;11	RORA-203;RORA-203	1;1
15	61852627	exon;three_prime_UTR;exon;three_prime_UTR	61852389;61852389;61852389;61852389	61854558;61854456;61854558;61854456	-;-;-;-	VPS13C;VPS13C;VPS13C;VPS13C	ENSG00000129003.19;ENSG00000129003.19;ENSG00000129003.19;ENSG00000129003.19	protein_coding;protein_coding;protein_coding;protein_coding	2;2;2;2	85;85;83;83	VPS13C-209;VPS13C-209;VPS13C-201;VPS13C-201	None;None;1;1
15	62284701	exon	62284541	62285006	+	AC126323.5	ENSG00000260957.1	lncRNA	2	2	AC126323.5-201	3
15	62844339	exon;three_prime_UTR	62840482;62840611	62844631;62844631	+;+	TLN2;TLN2	ENSG00000171914.16;ENSG00000171914.16	protein_coding;protein_coding	2;2	58;58	TLN2-209;TLN2-209	5;5
15	63062639	exon;CDS;exon;CDS;exon;CDS;exon;CDS;exon;CDS;exon;CDS;exon;CDS;exon;CDS;exon;CDS;exon;CDS;exon;CDS;exon;CDS;exon;CDS;exon;CDS;exon;CDS;exon;CDS;exon;CDS	63062576;63062576;63062576;63062576;63062576;63062576;63062576;63062576;63062576;63062576;63062576;63062576;63062576;63062576;63062576;63062576;63062576;63062576;63062576;63062576;63062576;63062576;63062576;63062576;63062576;63062576;63062576;63062576;63062576;63062576;63062576;63062576;63062576;63062576	63062645;63062645;63062645;63062645;63062645;63062645;63062645;63062645;63062645;63062645;63062645;63062645;63062645;63062645;63062645;63062645;63062645;63062645;63062645;63062645;63062645;63062645;63062645;63062645;63062645;63062645;63062645;63062645;63062892;63062809;63062645;63062645;63062645;63062645	+;+;+;+;+;+;+;+;+;+;+;+;+;+;+;+;+;+;+;+;+;+;+;+;+;+;+;+;+;+;+;+;+;+	TPM1;TPM1;TPM1;TPM1;TPM1;TPM1;TPM1;TPM1;TPM1;TPM1;TPM1;TPM1;TPM1;TPM1;TPM1;TPM1;TPM1;TPM1;TPM1;TPM1;TPM1;TPM1;TPM1;TPM1;TPM1;TPM1;TPM1;TPM1;TPM1;TPM1;TPM1;TPM1;TPM1;TPM1	ENSG00000140416.23;ENSG00000140416.23;ENSG00000140416.23;ENSG00000140416.23;ENSG00000140416.23;ENSG00000140416.23;ENSG00000140416.23;ENSG00000140416.23;ENSG00000140416.23;ENSG00000140416.23;ENSG00000140416.23;ENSG00000140416.23;ENSG00000140416.23;ENSG00000140416.23;ENSG00000140416.23;ENSG00000140416.23;ENSG00000140416.23;ENSG00000140416.23;ENSG00000140416.23;ENSG00000140416.23;ENSG00000140416.23;…	protein_coding;protein_coding;protein_coding;protein_coding;protein_coding;protein_coding;protein_coding;protein_coding;protein_coding;protein_coding;protein_coding;protein_coding;protein_coding;protein_coding;protein_coding;protein_coding;protein_coding;protein_coding;protein_coding;protein_coding;protein_coding;protein_coding;protein_coding;protein_coding;protein_coding;protein_coding;protein_c…	2;2;2;2;2;2;2;2;2;2;2;2;2;2;2;2;2;2;2;2;2;2;2;2;2;2;2;2;2;2;2;2;2;2	8;8;8;8;8;8;9;9;8;8;8;8;8;8;8;8;8;8;7;7;7;7;7;7;7;7;7;7;7;7;7;7;8;8	TPM1-202;TPM1-202;TPM1-206;TPM1-206;TPM1-207;TPM1-207;TPM1-205;TPM1-205;TPM1-220;TPM1-220;TPM1-201;TPM1-201;TPM1-219;TPM1-219;TPM1-229;TPM1-229;TPM1-226;TPM1-226;TPM1-238;TPM1-238;TPM1-204;TPM1-204;TPM1-208;TPM1-208;TPM1-216;TPM1-216;TPM1-203;TPM1-203;TPM1-225;TPM1-225;TPM1-218;TPM1-218;TPM1-235;TPM1-235	1;1;1;1;1;1;2;2;2;2;1;1;2;2;3;3;1;1;None;None;1;1;1;1;2;2;1;1;2;2;5;5;None;None
15	63070537	exon;three_prime_UTR;exon;three_prime_UTR;exon;three_prime_UTR	63069870;63069944;63069870;63069944;63069870;63069944	63071021;63071021;63070632;63070632;63070560;63070560	+;+;+;+;+;+	TPM1;TPM1;TPM1;TPM1;TPM1;TPM1	ENSG00000140416.23;ENSG00000140416.23;ENSG00000140416.23;ENSG00000140416.23;ENSG00000140416.23;ENSG00000140416.23	protein_coding;protein_coding;protein_coding;protein_coding;protein_coding;protein_coding	2;2;2;2;2;2	8;8;8;8;9;9	TPM1-238;TPM1-238;TPM1-204;TPM1-204;TPM1-235;TPM1-235	None;None;1;1;None;None
15	63149601	exon;three_prime_UTR	63148249;63148249	63154060;63154031	-;-	RPS27L;RPS27L	ENSG00000185088.14;ENSG00000185088.14	protein_coding;protein_coding	2;2	4;4	RPS27L-201;RPS27L-201	1;1
15	63264426	exon;three_prime_UTR	63263527;63263620	63267776;63267776	+;+	RAB8B;RAB8B	ENSG00000166128.13;ENSG00000166128.13	protein_coding;protein_coding	2;2	8;8	RAB8B-201;RAB8B-201	1;1
15	63553867	exon	63552912	63556608	-	USP3-AS1	ENSG00000259248.7	lncRNA	2	5	USP3-AS1-211	None
15	64155510	exon;three_prime_UTR	64154387;64154509	64157481;64157481	+;+	SNX22;SNX22	ENSG00000157734.14;ENSG00000157734.14	protein_coding;protein_coding	2;2	7;7	SNX22-201;SNX22-201	1;1
15	64397609	exon;CDS	64397606;64397606	64397818;64397818	+;+	TRIP4;TRIP4	ENSG00000103671.10;ENSG00000103671.10	protein_coding;protein_coding	2;2	4;4	TRIP4-201;TRIP4-201	1;1
15	64397676	exon;CDS	64397606;64397606	64397818;64397818	+;+	TRIP4;TRIP4	ENSG00000103671.10;ENSG00000103671.10	protein_coding;protein_coding	2;2	4;4	TRIP4-201;TRIP4-201	1;1
15	64501690	exon;three_prime_UTR	64499293;64500416	64503058;64503058	+;+	ZNF609;ZNF609	ENSG00000180357.9;ENSG00000180357.9	protein_coding;protein_coding	2;2	2;2	ZNF609-202;ZNF609-202	2;2
15	65053806	exon;three_prime_UTR	65053337;65053337	65055274;65054898	-;-	RASL12;RASL12	ENSG00000103710.11;ENSG00000103710.11	protein_coding;protein_coding	2;2	5;5	RASL12-201;RASL12-201	1;1
15	65150779	exon;three_prime_UTR	65148219;65148219	65150913;65150822	-;-	CLPX;CLPX	ENSG00000166855.9;ENSG00000166855.9	protein_coding;protein_coding	2;2	14;14	CLPX-201;CLPX-201	1;1
15	65444829	exon;three_prime_UTR;exon;three_prime_UTR	65442463;65442463;65442467;65442467	65447006;65446883;65447006;65446883	-;-;-;-	DPP8;DPP8;DPP8;DPP8	ENSG00000074603.19;ENSG00000074603.19;ENSG00000074603.19;ENSG00000074603.19	protein_coding;protein_coding;protein_coding;protein_coding	2;2;2;2	20;20;20;20	DPP8-203;DPP8-203;DPP8-201;DPP8-201	2;2;1;1
15	65610825	exon;five_prime_UTR	65610686;65610749	65611121;65611121	-;-	INTS14;INTS14	ENSG00000138614.15;ENSG00000138614.15	protein_coding;protein_coding	2;2	1;1	INTS14-209;INTS14-209	2;2
15	65654722	exon;three_prime_UTR;exon;three_prime_UTR	65653830;65654080;65653830;65654080	65656260;65656260;65656260;65656260	+;+;+;+	SLC24A1;SLC24A1;SLC24A1;SLC24A1	ENSG00000074621.14;ENSG00000074621.14;ENSG00000074621.14;ENSG00000074621.14	protein_coding;protein_coding;protein_coding;protein_coding	3;3;2;2	9;9;10;10	SLC24A1-202;SLC24A1-202;SLC24A1-201;SLC24A1-201	5;5;1;1
15	65896971	exon;three_prime_UTR;exon;three_prime_UTR;exon;three_prime_UTR	65895079;65895079;65895296;65895296;65895296;65895296	65898094;65897933;65898094;65897933;65898094;65897933	-;-;-;-;-;-	MEGF11;MEGF11;MEGF11;MEGF11;MEGF11;MEGF11	ENSG00000157890.17;ENSG00000157890.17;ENSG00000157890.17;ENSG00000157890.17;ENSG00000157890.17;ENSG00000157890.17	protein_coding;protein_coding;protein_coding;protein_coding;protein_coding;protein_coding	2;2;2;2;3;3	23;23;21;21;23;23	MEGF11-203;MEGF11-203;MEGF11-201;MEGF11-201;MEGF11-204;MEGF11-204	5;5;1;1;1;1
15	66337003	exon;CDS	66336191;66336958	66337181;66337181	-;-	TIPIN;TIPIN	ENSG00000075131.10;ENSG00000075131.10	protein_coding;protein_coding	2;2	8;8	TIPIN-201;TIPIN-201	1;1
15	67527207	exon;three_prime_UTR	67526418;67526546	67530146;67530146	+;+	C15orf61;C15orf61	ENSG00000189227.6;ENSG00000189227.6	protein_coding;protein_coding	2;2	2;2	C15orf61-201;C15orf61-201	1;1
15	67541233	exon	67541072	67542604	-	AC016355.1	ENSG00000270964.1	lncRNA	2	1	AC016355.1-201	NA
15	68191449	exon;three_prime_UTR;exon;three_prime_UTR;exon;three_prime_UTR;exon;three_prime_UTR	68191130;68191130;68190706;68190706;68190793;68190793;68187542;68187836	68194112;68194105;68194112;68194014;68194112;68194064;68193847;68193847	-;-;-;-;-;-;+;+	AC107871.1;AC107871.1;CALML4;CALML4;CALML4;CALML4;PIAS1;PIAS1	ENSG00000260007.3;ENSG00000260007.3;ENSG00000129007.14;ENSG00000129007.14;ENSG00000129007.14;ENSG00000129007.14;ENSG00000033800.14;ENSG00000033800.14	protein_coding;protein_coding;protein_coding;protein_coding;protein_coding;protein_coding;protein_coding;protein_coding	2;2;3;3;2;2;2;2	3;3;4;4;2;2;14;14	AC107871.1-202;AC107871.1-202;CALML4-208;CALML4-208;CALML4-203;CALML4-203;PIAS1-201;PIAS1-201	3;3;1;1;1;1;1;1
15	68297636	exon;three_prime_UTR;exon;three_prime_UTR	68296532;68296532;68296533;68296533	68303130;68303058;68303130;68303058	-;-;-;-	ITGA11;ITGA11;ITGA11;ITGA11	ENSG00000137809.17;ENSG00000137809.17;ENSG00000137809.17;ENSG00000137809.17	protein_coding;protein_coding;protein_coding;protein_coding	2;2;2;2	30;30;30;30	ITGA11-201;ITGA11-201;ITGA11-202;ITGA11-202	1;1;2;2
15	68946175	exon;CDS	68945599;68945599	68946811;68946587	+;+	SPESP1;SPESP1	ENSG00000258484.4;ENSG00000258484.4	protein_coding;protein_coding	2;2	2;2	SPESP1-201;SPESP1-201	1;1
15	69271262	exon;three_prime_UTR;exon;three_prime_UTR	69268220;69269245;69268220;69269245	69272207;69272207;69272217;69272217	+;+;+;+	GLCE;GLCE;GLCE;GLCE	ENSG00000138604.10;ENSG00000138604.10;ENSG00000138604.10;ENSG00000138604.10	protein_coding;protein_coding;protein_coding;protein_coding	2;2;2;2	5;5;3;3	GLCE-201;GLCE-201;GLCE-202;GLCE-202	1;1;1;1
15	69407627	exon;three_prime_UTR;exon;three_prime_UTR	69403581;69403823;69403581;69403823	69407780;69407780;69407641;69407641	+;+;+;+	PAQR5;PAQR5;PAQR5;PAQR5	ENSG00000137819.14;ENSG00000137819.14;ENSG00000137819.14;ENSG00000137819.14	protein_coding;protein_coding;protein_coding;protein_coding	2;2;3;3	9;9;7;7	PAQR5-202;PAQR5-202;PAQR5-201;PAQR5-201	1;1;1;1
15	70637048	exon	70635249	70637314	+	SALRNA2	ENSG00000280515.1	lncRNA	2	1	SALRNA2-201	NA
15	70829759	exon;three_prime_UTR	70829130;70829130	70833116;70832051	-;-	LARP6;LARP6	ENSG00000166173.11;ENSG00000166173.11	protein_coding;protein_coding	2;2	3;3	LARP6-201;LARP6-201	1;1
15	71111561	exon	71110244	71112294	-	CT62	ENSG00000225362.10	lncRNA	1	3	CT62-202	2
15	71111573	exon	71110244	71112294	-	CT62	ENSG00000225362.10	lncRNA	1	3	CT62-202	2
15	71341457	exon	71341158	71341712	-	AC064799.1	ENSG00000212664.5	processed_pseudogene	2	1	AC064799.1-201	NA
15	72594838	exon;three_prime_UTR	72583208;72583293	72602987;72602987	+;+	ARIH1;ARIH1	ENSG00000166233.15;ENSG00000166233.15	protein_coding;protein_coding	2;2	14;14	ARIH1-201;ARIH1-201	1;1
15	72899498	exon	72899399	72900260	-	NPM1P42	ENSG00000259259.1	processed_pseudogene	1	1	NPM1P42-201	NA
15	74295838	exon;CDS	74295754;74295754	74295948;74295948	+;+	CCDC33;CCDC33	ENSG00000140481.15;ENSG00000140481.15	protein_coding;protein_coding	2;2	11;11	CCDC33-203;CCDC33-203	2;2
15	74362068	exon	74361514	74364620	+	PPIAP46	ENSG00000260266.1	transcribed_processed_pseudogene	2	2	PPIAP46-201	1
15	74719645	exon;three_prime_UTR;exon;three_prime_UTR;exon;three_prime_UTR;exon;three_prime_UTR	74719542;74719542;74719542;74719542;74719542;74719542;74719542;74719542	74720774;74720488;74720774;74720488;74720774;74720488;74720774;74720488	-;-;-;-;-;-;-;-	CYP1A1;CYP1A1;CYP1A1;CYP1A1;CYP1A1;CYP1A1;CYP1A1;CYP1A1	ENSG00000140465.14;ENSG00000140465.14;ENSG00000140465.14;ENSG00000140465.14;ENSG00000140465.14;ENSG00000140465.14;ENSG00000140465.14;ENSG00000140465.14	protein_coding;protein_coding;protein_coding;protein_coding;protein_coding;protein_coding;protein_coding;protein_coding	3;3;2;2;3;3;3;3	7;7;7;7;6;6;7;7	CYP1A1-209;CYP1A1-209;CYP1A1-201;CYP1A1-201;CYP1A1-210;CYP1A1-210;CYP1A1-202;CYP1A1-202	5;5;1;1;5;5;1;1
15	74824348	exon	74823559	74826867	+	AC091230.1	ENSG00000261606.5	lncRNA	2	4	AC091230.1-202	2
15	74898079	exon;three_prime_UTR;exon;three_prime_UTR;exon;three_prime_UTR	74897512;74897532;74897512;74897731;74897512;74897731	74899441;74899441;74898228;74898228;74902219;74902219	+;+;+;+;+;+	MPI;MPI;MPI;MPI;MPI;MPI	ENSG00000178802.18;ENSG00000178802.18;ENSG00000178802.18;ENSG00000178802.18;ENSG00000178802.18;ENSG00000178802.18	protein_coding;protein_coding;protein_coding;protein_coding;protein_coding;protein_coding	2;2;2;2;2;2	7;7;7;7;8;8	MPI-213;MPI-213;MPI-201;MPI-201;MPI-202;MPI-202	1;1;1;1;1;1
15	75421039	exon;three_prime_UTR	75419210;75419210	75422823;75422541	-;-	SIN3A;SIN3A	ENSG00000169375.16;ENSG00000169375.16	protein_coding;protein_coding	2;2	3;3	SIN3A-208;SIN3A-208	2;2
15	75675573	exon;CDS	75674322;75675550	75677384;75677384	-;-	CSPG4;CSPG4	ENSG00000173546.7;ENSG00000173546.7	protein_coding;protein_coding	2;2	10;10	CSPG4-201;CSPG4-201	1;1
15	75899883	exon;three_prime_UTR;exon;three_prime_UTR	75899427;75899459;75899427;75899459	75901044;75901044;75901078;75901078	+;+;+;+	UBE2Q2;UBE2Q2;UBE2Q2;UBE2Q2	ENSG00000140367.12;ENSG00000140367.12;ENSG00000140367.12;ENSG00000140367.12	protein_coding;protein_coding;protein_coding;protein_coding	2;2;2;2	12;12;13;13	UBE2Q2-208;UBE2Q2-208;UBE2Q2-201;UBE2Q2-201	2;2;1;1
15	75950744	exon	75950464	75951144	-	AC027104.1	ENSG00000260685.1	processed_pseudogene	1	1	AC027104.1-201	NA
15	76344033	exon	76343642	76344365	+	AC027243.2	ENSG00000270036.1	lncRNA	2	1	AC027243.2-201	NA
15	76949521	exon;three_prime_UTR;exon;three_prime_UTR;exon;three_prime_UTR	76949070;76949223;76949070;76949223;76949070;76949223	76949860;76949860;76954393;76954393;76949850;76949850	+;+;+;+;+;+	RCN2;RCN2;RCN2;RCN2;RCN2;RCN2	ENSG00000117906.14;ENSG00000117906.14;ENSG00000117906.14;ENSG00000117906.14;ENSG00000117906.14;ENSG00000117906.14	protein_coding;protein_coding;protein_coding;protein_coding;protein_coding;protein_coding	2;2;2;2;2;2	8;8;7;7;5;5	RCN2-201;RCN2-201;RCN2-203;RCN2-203;RCN2-202;RCN2-202	5;5;1;1;5;5
15	76949914	exon;three_prime_UTR	76949070;76949223	76954393;76954393	+;+	RCN2;RCN2	ENSG00000117906.14;ENSG00000117906.14	protein_coding;protein_coding	2;2	7;7	RCN2-203;RCN2-203	1;1
15	78167517	exon;three_prime_UTR	78167468;78167468	78171529;78171443	-;-	ACSBG1;ACSBG1	ENSG00000103740.10;ENSG00000103740.10	protein_coding;protein_coding	2;2	14;14	ACSBG1-201;ACSBG1-201	1;1
15	78169445	exon;three_prime_UTR;exon;three_prime_UTR;exon;three_prime_UTR	78168922;78169006;78168922;78169006;78167468;78167468	78169560;78169560;78171945;78171945;78171529;78171443	+;+;+;+;-;-	IDH3A;IDH3A;IDH3A;IDH3A;ACSBG1;ACSBG1	ENSG00000166411.14;ENSG00000166411.14;ENSG00000166411.14;ENSG00000166411.14;ENSG00000103740.10;ENSG00000103740.10	protein_coding;protein_coding;protein_coding;protein_coding;protein_coding;protein_coding	2;2;2;2;2;2	11;11;11;11;14;14	IDH3A-207;IDH3A-207;IDH3A-201;IDH3A-201;ACSBG1-201;ACSBG1-201	2;2;1;1;1;1
15	78171123	exon;three_prime_UTR;exon;three_prime_UTR;exon;three_prime_UTR	78168922;78169006;78170914;78170914;78167468;78167468	78171945;78171945;78171529;78171443;78171529;78171443	+;+;-;-;-;-	IDH3A;IDH3A;ACSBG1;ACSBG1;ACSBG1;ACSBG1	ENSG00000166411.14;ENSG00000166411.14;ENSG00000103740.10;ENSG00000103740.10;ENSG00000103740.10;ENSG00000103740.10	protein_coding;protein_coding;protein_coding;protein_coding;protein_coding;protein_coding	2;2;2;2;2;2	11;11;10;10;14;14	IDH3A-201;IDH3A-201;ACSBG1-214;ACSBG1-214;ACSBG1-201;ACSBG1-201	1;1;5;5;1;1
15	78339285	exon	78339208	78341757	-	AC011270.2	ENSG00000279694.1	TEC	2	1	AC011270.2-201	NA
15	78533484	exon;CDS;exon;CDS	78533210;78533210;78533210;78533210	78536645;78533670;78536645;78533670	+;+;+;+	HYKK;HYKK;HYKK;HYKK	ENSG00000188266.14;ENSG00000188266.14;ENSG00000188266.14;ENSG00000188266.14	protein_coding;protein_coding;protein_coding;protein_coding	2;2;2;2	5;5;4;4	HYKK-201;HYKK-201;HYKK-206;HYKK-206	5;5;5;5
15	78552117	exon;three_prime_UTR	78548790;78548945	78552417;78552417	+;+	PSMA4;PSMA4	ENSG00000041357.16;ENSG00000041357.16	protein_coding;protein_coding	2;2	9;9	PSMA4-201;PSMA4-201	1;1
15	78596532	exon;three_prime_UTR	78595309;78595309	78596732;78596603	-;-	CHRNA3;CHRNA3	ENSG00000080644.16;ENSG00000080644.16	protein_coding;protein_coding	2;2	6;6	CHRNA3-201;CHRNA3-201	1;1
15	79414722	exon;three_prime_UTR	79411400;79411505	79427432;79427432	+;+	TMED3;TMED3	ENSG00000166557.14;ENSG00000166557.14	protein_coding;protein_coding	2;2	3;3	TMED3-202;TMED3-202	3;3
15	79422767	exon;three_prime_UTR	79411400;79411505	79427432;79427432	+;+	TMED3;TMED3	ENSG00000166557.14;ENSG00000166557.14	protein_coding;protein_coding	2;2	3;3	TMED3-202;TMED3-202	3;3
15	79422953	exon;three_prime_UTR	79411400;79411505	79427432;79427432	+;+	TMED3;TMED3	ENSG00000166557.14;ENSG00000166557.14	protein_coding;protein_coding	2;2	3;3	TMED3-202;TMED3-202	3;3
15	80693601	exon	80693216	80693707	-	AC023302.1	ENSG00000271983.1	lncRNA	2	1	AC023302.1-201	NA
15	80951546	exon;three_prime_UTR;exon;three_prime_UTR;exon;three_prime_UTR	80948797;80948925;80948797;80948925;80948797;80948925	80951776;80951776;80951771;80951771;80951776;80951776	+;+;+;+;+;+	CEMIP;CEMIP;CEMIP;CEMIP;CEMIP;CEMIP	ENSG00000103888.17;ENSG00000103888.17;ENSG00000103888.17;ENSG00000103888.17;ENSG00000103888.17;ENSG00000103888.17	protein_coding;protein_coding;protein_coding;protein_coding;protein_coding;protein_coding	2;2;2;2;3;3	29;29;30;30;30;30	CEMIP-201;CEMIP-201;CEMIP-203;CEMIP-203;CEMIP-202;CEMIP-202	1;1;1;1;1;1
15	80977235	exon;three_prime_UTR	80975752;80975752	80979477;80979218	-;-	MESD;MESD	ENSG00000117899.11;ENSG00000117899.11	protein_coding;protein_coding	2;2	3;3	MESD-201;MESD-201	1;1
15	81000933	five_prime_UTR;exon	81000923;81000923	81002271;81005788	+;+	TLNRD1;TLNRD1	ENSG00000140406.4;ENSG00000140406.4	protein_coding;protein_coding	2;2	1;1	TLNRD1-201;TLNRD1-201	NA;NA
15	81135345	exon;CDS	81135270;81135270	81135359;81135359	+;+	CFAP161;CFAP161	ENSG00000156206.14;ENSG00000156206.14	protein_coding;protein_coding	2;2	2;2	CFAP161-201;CFAP161-201	1;1
15	82282888	exon;CDS	82282119;82282119	82284930;82283062	+;+	SAXO2;SAXO2	ENSG00000188659.9;ENSG00000188659.9	protein_coding;protein_coding	2;2	3;3	SAXO2-201;SAXO2-201	1;1
15	84714851	exon;five_prime_UTR	84714731;84714731	84714866;84714866	-;-	SEC11A;SEC11A	ENSG00000140612.14;ENSG00000140612.14	protein_coding;protein_coding	1;1	2;2	SEC11A-202;SEC11A-202	1;1
15	84746510	exon	84745208	84746837	-	AC012291.3	ENSG00000285667.1	lncRNA	2	1	AC012291.3-201	None
15	84804551	exon;three_prime_UTR;exon;three_prime_UTR	84801863;84802394;84801863;84802394	84806445;84806445;84806430;84806430	+;+;+;+	ZNF592;ZNF592;ZNF592;ZNF592	ENSG00000166716.10;ENSG00000166716.10;ENSG00000166716.10;ENSG00000166716.10	protein_coding;protein_coding;protein_coding;protein_coding	2;2;3;3	11;11;8;8	ZNF592-203;ZNF592-203;ZNF592-201;ZNF592-201	1;1;2;2
15	84940745	exon	84940504	84941133	-	AC087468.1	ENSG00000271044.1	processed_pseudogene	1	1	AC087468.1-201	NA
15	85759359	exon;three_prime_UTR	85759326;85759326	85761011;85761011	-;-	KLHL25;KLHL25	ENSG00000183655.13;ENSG00000183655.13	protein_coding;protein_coding	2;2	3;3	KLHL25-201;KLHL25-201	1;1
15	87326542	exon	87325829	87326830	-	AC020687.1	ENSG00000259560.2	lncRNA	2	5	AC020687.1-203	None
15	87869905	exon;three_prime_UTR	87859751;87859751	87877120;87876934	-;-	NTRK3;NTRK3	ENSG00000140538.16;ENSG00000140538.16	protein_coding;protein_coding	2;2	19;19	NTRK3-205;NTRK3-205	5;5
15	87870840	exon;three_prime_UTR	87859751;87859751	87877120;87876934	-;-	NTRK3;NTRK3	ENSG00000140538.16;ENSG00000140538.16	protein_coding;protein_coding	2;2	19;19	NTRK3-205;NTRK3-205	5;5
15	87872958	exon;three_prime_UTR	87859751;87859751	87877120;87876934	-;-	NTRK3;NTRK3	ENSG00000140538.16;ENSG00000140538.16	protein_coding;protein_coding	2;2	19;19	NTRK3-205;NTRK3-205	5;5
15	88480226	exon;three_prime_UTR	88477872;88477980	88480776;88480776	+;+	MRPS11;MRPS11	ENSG00000181991.16;ENSG00000181991.16	protein_coding;protein_coding	2;2	6;6	MRPS11-201;MRPS11-201	1;1
15	89198269	exon;three_prime_UTR	89195227;89195424	89202355;89202355	+;+	ABHD2;ABHD2	ENSG00000140526.18;ENSG00000140526.18	protein_coding;protein_coding	2;2	11;11	ABHD2-201;ABHD2-201	1;1
15	89283207	exon;CDS;exon;CDS;exon;CDS;exon;CDS	89283136;89283136;89283136;89283136;89283136;89283136;89283136;89283136	89283250;89283250;89283250;89283250;89283250;89283250;89283250;89283250	+;+;+;+;+;+;+;+	FANCI;FANCI;FANCI;FANCI;FANCI;FANCI;FANCI;FANCI	ENSG00000140525.19;ENSG00000140525.19;ENSG00000140525.19;ENSG00000140525.19;ENSG00000140525.19;ENSG00000140525.19;ENSG00000140525.19;ENSG00000140525.19	protein_coding;protein_coding;protein_coding;protein_coding;protein_coding;protein_coding;protein_coding;protein_coding	2;2;2;2;2;2;2;2	17;17;17;17;17;17;18;18	FANCI-218;FANCI-218;FANCI-201;FANCI-201;FANCI-202;FANCI-202;FANCI-220;FANCI-220	None;None;5;5;1;1;None;None
15	89877145	exon	89876540	89877285	+	AC027176.2	ENSG00000259677.1	processed_pseudogene	1	1	AC027176.2-201	NA
15	89899461	exon;three_prime_UTR	89895006;89895006	89901803;89901794	-;-	ARPIN;ARPIN	ENSG00000242498.8;ENSG00000242498.8	protein_coding;protein_coding	2;2	6;6	ARPIN-201;ARPIN-201	1;1
15	90229447	exon;three_prime_UTR;exon;three_prime_UTR	90227904;90228644;90227904;90228644	90229670;90229670;90229676;90229676	+;+;+;+	SEMA4B;SEMA4B;SEMA4B;SEMA4B	ENSG00000185033.14;ENSG00000185033.14;ENSG00000185033.14;ENSG00000185033.14	protein_coding;protein_coding;protein_coding;protein_coding	2;2;2;2	15;15;14;14	SEMA4B-201;SEMA4B-201;SEMA4B-202;SEMA4B-202	1;1;1;1
15	90643653	exon;three_prime_UTR;exon;three_prime_UTR	90641932;90642141;90641935;90642141	90645345;90645345;90645345;90645345	+;+;+;+	CRTC3;CRTC3;CRTC3;CRTC3	ENSG00000140577.16;ENSG00000140577.16;ENSG00000140577.16;ENSG00000140577.16	protein_coding;protein_coding;protein_coding;protein_coding	2;2;2;2	15;15;15;15	CRTC3-201;CRTC3-201;CRTC3-202;CRTC3-202	1;1;2;2
15	90761015	exon;CDS;exon;CDS	90760594;90760594;90760594;90760594	90761255;90761255;90761255;90761255	+;+;+;+	BLM;BLM;BLM;BLM	ENSG00000197299.12;ENSG00000197299.12;ENSG00000197299.12;ENSG00000197299.12	protein_coding;protein_coding;protein_coding;protein_coding	2;2;1;1	7;7;7;7	BLM-201;BLM-201;BLM-208;BLM-208	1;1;1;1
15	90954449	exon	90954335	90955225	-	RCCD1-AS1	ENSG00000258384.1	lncRNA	2	1	RCCD1-AS1-201	2
15	90981406	exon;exon	90980753;90981365	90982090;90982090	+;+	PRC1-AS1;PRC1-AS1	ENSG00000258725.2;ENSG00000258725.2	lncRNA;lncRNA	2;2	1;1	PRC1-AS1-203;PRC1-AS1-204	None;None
15	91294642	exon;three_prime_UTR;exon;three_prime_UTR	91292369;91292553;91292369;91292553	91301309;91301309;91301308;91301308	+;+;+;+	SV2B;SV2B;SV2B;SV2B	ENSG00000185518.11;ENSG00000185518.11;ENSG00000185518.11;ENSG00000185518.11	protein_coding;protein_coding;protein_coding;protein_coding	2;2;3;3	13;13;12;12	SV2B-202;SV2B-202;SV2B-201;SV2B-201	5;5;1;1
15	92904962	exon;CDS	92904473;92904908	92905008;92905008	+;+	CHD2;CHD2	ENSG00000173575.22;ENSG00000173575.22	protein_coding;protein_coding	2;2	1;1	CHD2-207;CHD2-207	2;2
15	93021741	exon;three_prime_UTR	93020012;93020326	93022162;93022162	+;+	CHD2;CHD2	ENSG00000173575.22;ENSG00000173575.22	protein_coding;protein_coding	2;2	38;38	CHD2-208;CHD2-208	1;1
15	94458241	exon;CDS;exon;CDS	94458137;94458137;94458137;94458137	94458246;94458246;94458246;94458246	+;+;+;+	MCTP2;MCTP2;MCTP2;MCTP2	ENSG00000140563.15;ENSG00000140563.15;ENSG00000140563.15;ENSG00000140563.15	protein_coding;protein_coding;protein_coding;protein_coding	2;2;2;2	19;19;17;17	MCTP2-201;MCTP2-201;MCTP2-203;MCTP2-203	1;1;1;1
15	94479539	exon;three_prime_UTR	94478966;94479035	94483952;94483952	+;+	MCTP2;MCTP2	ENSG00000140563.15;ENSG00000140563.15	protein_coding;protein_coding	2;2	22;22	MCTP2-201;MCTP2-201	1;1
15	95210044	exon;exon;exon	95209093;95209098;95209124	95210641;95210641;95210641	-;-;-	LINC01197;LINC01197;LINC01197	ENSG00000248441.7;ENSG00000248441.7;ENSG00000248441.7	lncRNA;lncRNA;lncRNA	2;2;2	6;6;5	LINC01197-217;LINC01197-222;LINC01197-216	None;None;None
15	95275326	exon	95274040	95277376	-	LINC01197	ENSG00000248441.7	lncRNA	2	4	LINC01197-202	3
15	97536710	exon	97533738	97541476	-	AC026523.2	ENSG00000279091.1	TEC	2	1	AC026523.2-201	NA
15	97706431	exon	97705461	97706650	-	LINC00923	ENSG00000251209.9	lncRNA	2	1	LINC00923-214	None
15	99389401	exon;three_prime_UTR	99386030;99386103	99390729;99390729	+;+	LRRC28;LRRC28	ENSG00000168904.15;ENSG00000168904.15	protein_coding;protein_coding	2;2	10;10	LRRC28-201;LRRC28-201	1;1
15	99390091	exon;three_prime_UTR	99386030;99386103	99390729;99390729	+;+	LRRC28;LRRC28	ENSG00000168904.15;ENSG00000168904.15	protein_coding;protein_coding	2;2	10;10	LRRC28-201;LRRC28-201	1;1
16	10515041	exon	10514842	10515232	-	LINC01290	ENSG00000260468.1	lncRNA	2	2	LINC01290-201	2
16	10532786	exon;three_prime_UTR	10528422;10528422	10533092;10532904	-;-	EMP2;EMP2	ENSG00000213853.10;ENSG00000213853.10	protein_coding;protein_coding	2;2	5;5	EMP2-202;EMP2-202	1;1
16	10767408	exon;three_prime_UTR	10766675;10766675	10769101;10769101	-;-	TVP23A;TVP23A	ENSG00000166676.17;ENSG00000166676.17	protein_coding;protein_coding	2;2	8;8	TVP23A-201;TVP23A-201	2;2
16	11275952	exon;CDS	11275640;11275830	11275981;11275981	-;-	PRM2;PRM2	ENSG00000122304.11;ENSG00000122304.11	protein_coding;protein_coding	2;2	2;2	PRM2-202;PRM2-202	2;2
16	11350876	exon;three_prime_UTR;exon;three_prime_UTR;exon;three_prime_UTR	11350642;11350791;11350642;11350654;11350642;11350791	11351755;11351755;11351365;11351365;11351760;11351760	+;+;+;+;+;+	RMI2;RMI2;RMI2;RMI2;RMI2;RMI2	ENSG00000175643.10;ENSG00000175643.10;ENSG00000175643.10;ENSG00000175643.10;ENSG00000175643.10;ENSG00000175643.10	protein_coding;protein_coding;protein_coding;protein_coding;protein_coding;protein_coding	2;2;2;2;2;2	5;5;2;2;2;2	RMI2-202;RMI2-202;RMI2-205;RMI2-205;RMI2-201;RMI2-201	1;1;2;2;1;1
16	11836158	exon;three_prime_UTR	11833850;11833850	11838113;11837786	-;-	RSL1D1;RSL1D1	ENSG00000171490.13;ENSG00000171490.13	protein_coding;protein_coding	2;2	9;9	RSL1D1-204;RSL1D1-204	1;1
16	1221762	exon;three_prime_UTR;exon;three_prime_UTR;exon;three_prime_UTR;exon;three_prime_UTR;exon;three_prime_UTR	1219981;1220995;1219981;1220995;1219981;1220995;1219981;1220995;1221651;1221651	1221768;1221768;1221771;1221771;1221771;1221771;1221765;1221765;1222096;1221787	+;+;+;+;+;+;+;+;-;-	CACNA1H;CACNA1H;CACNA1H;CACNA1H;CACNA1H;CACNA1H;CACNA1H;CACNA1H;TPSG1;TPSG1	ENSG00000196557.13;ENSG00000196557.13;ENSG00000196557.13;ENSG00000196557.13;ENSG00000196557.13;ENSG00000196557.13;ENSG00000196557.13;ENSG00000196557.13;ENSG00000116176.6;ENSG00000116176.6	protein_coding;protein_coding;protein_coding;protein_coding;protein_coding;protein_coding;protein_coding;protein_coding;protein_coding;protein_coding	2;2;2;2;3;3;2;2;2;2	35;35;35;35;34;34;33;33;6;6	CACNA1H-201;CACNA1H-201;CACNA1H-210;CACNA1H-210;CACNA1H-202;CACNA1H-202;CACNA1H-206;CACNA1H-206;TPSG1-201;TPSG1-201	1;1;5;5;5;5;1;1;1;1
16	12908737	exon;three_prime_UTR	12908479;12908582	12911650;12911650	+;+	SHISA9;SHISA9	ENSG00000237515.9;ENSG00000237515.9	protein_coding;protein_coding	2;2	2;2	SHISA9-201;SHISA9-201	1;1
16	14329481	exon	14326013	14331067	+	MIR193BHG	ENSG00000262454.4	lncRNA	2	2	MIR193BHG-211	None
16	14862699	exon	14862380	14862749	-	AC136443.5	ENSG00000270734.1	processed_pseudogene	1	1	AC136443.5-201	NA
16	15015892	exon	15015828	15016390	-	AC138932.5	ENSG00000275910.1	lncRNA	2	1	AC138932.5-201	NA
16	15037774	exon;three_prime_UTR;exon;three_prime_UTR	15036016;15036276;15036016;15036276	15038332;15038332;15038323;15038323	+;+;+;+	PDXDC1;PDXDC1;PDXDC1;PDXDC1	ENSG00000179889.19;ENSG00000179889.19;ENSG00000179889.19;ENSG00000179889.19	protein_coding;protein_coding;protein_coding;protein_coding	2;2;3;3	23;23;20;20	PDXDC1-202;PDXDC1-202;PDXDC1-203;PDXDC1-203	1;1;5;5
16	15410917	exon;three_prime_UTR;exon;three_prime_UTR	15407933;15408037;15407933;15408113	15413268;15413268;15413271;15413271	+;+;+;+	MPV17L;MPV17L;MPV17L;MPV17L	ENSG00000156968.9;ENSG00000156968.9;ENSG00000156968.9;ENSG00000156968.9	protein_coding;protein_coding;protein_coding;protein_coding	2;2;2;2	3;3;4;4	MPV17L-201;MPV17L-201;MPV17L-202;MPV17L-202	1;1;1;1
16	15702000	exon	15701237	15702118	+	AC026401.3	ENSG00000280206.1	lncRNA	2	1	AC026401.3-201	NA
16	15792598	exon	15790975	15792717	-	AF001548.3	ENSG00000280429.1	TEC	2	1	AF001548.3-201	NA
16	15866054	exon;three_prime_UTR;exon;three_prime_UTR	15865719;15865719;15865721;15865721	15867516;15867439;15867516;15867439	-;-;-;-	CEP20;CEP20;CEP20;CEP20	ENSG00000133393.13;ENSG00000133393.13;ENSG00000133393.13;ENSG00000133393.13	protein_coding;protein_coding;protein_coding;protein_coding	2;2;2;2	5;5;3;3	CEP20-201;CEP20-201;CEP20-206;CEP20-206	1;1;2;2
16	16760996	exon	16760905	16762465	+	AC092326.1	ENSG00000279729.1	TEC	2	1	AC092326.1-201	NA
16	18374540	exon	18374521	18374607	-	PKD1P5	ENSG00000254681.6	transcribed_unprocessed_pseudogene	2	32	PKD1P5-201	NA
16	19172649	exon;five_prime_UTR	19169782;19169782	19173578;19173578	+;+	SYT17;SYT17	ENSG00000103528.17;ENSG00000103528.17	protein_coding;protein_coding	2;2	1;1	SYT17-202;SYT17-202	1;1
16	19315838	exon	19315164	19316526	+	AC130456.1	ENSG00000259871.1	lncRNA	2	1	AC130456.1-201	NA
16	1944543	exon;three_prime_UTR	1943974;1943974	1944893;1944836	-;-	RPL3L;RPL3L	ENSG00000140986.8;ENSG00000140986.8	protein_coding;protein_coding	2;2	10;10	RPL3L-201;RPL3L-201	1;1
16	1944567	exon;three_prime_UTR	1943974;1943974	1944893;1944836	-;-	RPL3L;RPL3L	ENSG00000140986.8;ENSG00000140986.8	protein_coding;protein_coding	2;2	10;10	RPL3L-201;RPL3L-201	1;1
16	19498764	exon;three_prime_UTR;exon;three_prime_UTR;exon;three_prime_UTR;exon;three_prime_UTR	19497920;19497967;19497920;19497967;19497920;19497967;19497920;19497967	19499113;19499113;19499113;19499113;19499113;19499113;19499113;19499113	+;+;+;+;+;+;+;+	TMC5;TMC5;TMC5;TMC5;TMC5;TMC5;TMC5;TMC5	ENSG00000103534.17;ENSG00000103534.17;ENSG00000103534.17;ENSG00000103534.17;ENSG00000103534.17;ENSG00000103534.17;ENSG00000103534.17;ENSG00000103534.17	protein_coding;protein_coding;protein_coding;protein_coding;protein_coding;protein_coding;protein_coding;protein_coding	2;2;3;3;2;2;2;2	21;21;22;22;22;22;18;18	TMC5-202;TMC5-202;TMC5-203;TMC5-203;TMC5-205;TMC5-205;TMC5-201;TMC5-201	1;1;5;5;2;2;1;1
16	1962057	exon;three_prime_UTR	1962058;1962058	1962270;1962097	-;-	RPS2;RPS2	ENSG00000140988.16;ENSG00000140988.16	protein_coding;protein_coding	2;2	7;7	RPS2-201;RPS2-201	1;1
16	1979926	exon;three_prime_UTR	1978552;1978686	1982929;1982929	+;+	TBL3;TBL3	ENSG00000183751.15;ENSG00000183751.15	protein_coding;protein_coding	2;2	22;22	TBL3-205;TBL3-205	1;1
16	20806444	exon;five_prime_UTR;exon;five_prime_UTR;exon;five_prime_UTR;exon;five_prime_UTR	20806408;20806431;20806408;20806431;20806408;20806431;20806408;20806408	20806473;20806473;20806472;20806472;20806476;20806476;20806676;20806676	-;-;-;-;-;-;-;-	ERI2;ERI2;ERI2;ERI2;ERI2;ERI2;ERI2;ERI2	ENSG00000196678.14;ENSG00000196678.14;ENSG00000196678.14;ENSG00000196678.14;ENSG00000196678.14;ENSG00000196678.14;ENSG00000196678.14;ENSG00000196678.14	protein_coding;protein_coding;protein_coding;protein_coding;protein_coding;protein_coding;protein_coding;protein_coding	2;2;2;2;2;2;2;2	1;1;1;1;1;1;1;1	ERI2-201;ERI2-201;ERI2-202;ERI2-202;ERI2-215;ERI2-215;ERI2-206;ERI2-206	1;1;5;5;2;2;2;2
16	20856154	exon;three_prime_UTR	20854925;20854925	20860369;20859885	-;-	DCUN1D3;DCUN1D3	ENSG00000188215.10;ENSG00000188215.10	protein_coding;protein_coding	2;2	3;3	DCUN1D3-201;DCUN1D3-201	1;1
16	21471749	exon;exon	21471654;21471654	21471751;21471751	-;-	SMG1P3;SMG1P3	ENSG00000180747.15;ENSG00000180747.15	transcribed_unprocessed_pseudogene;transcribed_unprocessed_pseudogene	2;2	9;8	SMG1P3-205;SMG1P3-206	NA;2
16	21656997	exon;three_prime_UTR;exon;three_prime_UTR	21655227;21655433;21655227;21655433	21657471;21657471;21657473;21657473	+;+;+;+	METTL9;METTL9;METTL9;METTL9	ENSG00000197006.14;ENSG00000197006.14;ENSG00000197006.14;ENSG00000197006.14	protein_coding;protein_coding;protein_coding;protein_coding	2;2;3;3	5;5;6;6	METTL9-201;METTL9-201;METTL9-211;METTL9-211	1;1;2;2
16	21810655	exon	21810427	21810838	-	RRN3P1	ENSG00000248124.8	transcribed_unprocessed_pseudogene	2	8	RRN3P1-203	1
16	21895605	exon	21895523	21895792	-	SMG1P4	ENSG00000185710.9	transcribed_unprocessed_pseudogene	2	12	SMG1P4-204	NA
16	22008407	exon;CDS;exon;CDS;exon;CDS	22008111;22008302;22008209;22008302;22008283;22008302	22008407;22008407;22008407;22008407;22008407;22008407	+;+;+;+;+;+	MOSMO;MOSMO;MOSMO;MOSMO;MOSMO;MOSMO	ENSG00000185716.12;ENSG00000185716.12;ENSG00000185716.12;ENSG00000185716.12;ENSG00000185716.12;ENSG00000185716.12	protein_coding;protein_coding;protein_coding;protein_coding;protein_coding;protein_coding	2;2;3;3;2;2	1;1;1;1;1;1	MOSMO-202;MOSMO-202;MOSMO-207;MOSMO-207;MOSMO-204;MOSMO-204	5;5;5;5;2;2
16	22080898	exon;three_prime_UTR	22080696;22080881	22084654;22084654	+;+	MOSMO;MOSMO	ENSG00000185716.12;ENSG00000185716.12	protein_coding;protein_coding	2;2	3;3	MOSMO-202;MOSMO-202	5;5
16	22407434	exon	22407305	22407598	+	MFSD13B	ENSG00000230872.2	transcribed_unitary_pseudogene	2	4	MFSD13B-202	None
16	22419289	exon	22418672	22420594	-	RRN3P3	ENSG00000257122.5	transcribed_unprocessed_pseudogene	2	7	RRN3P3-202	2
16	23412463	exon	23412380	23416680	+	RN7SKP23	ENSG00000280039.1	TEC	2	1	RN7SKP23-201	NA
16	23521780	exon;three_prime_UTR	23520754;23520754	23524454;23524370	-;-	EARS2;EARS2	ENSG00000103356.18;ENSG00000103356.18	protein_coding;protein_coding	2;2	9;9	EARS2-201;EARS2-201	1;1
16	23557618	exon;five_prime_UTR	23557205;23557344	23557731;23557731	-;-	EARS2;EARS2	ENSG00000103356.18;ENSG00000103356.18	protein_coding;protein_coding	2;2	1;1	EARS2-209;EARS2-209	5;5
16	23569180	exon	23568673	23569696	+	AC008870.2	ENSG00000260751.2	lncRNA	2	1	AC008870.2-201	NA
16	24216001	exon;three_prime_UTR	24214658;24214817	24220611;24220611	+;+	PRKCB;PRKCB	ENSG00000166501.14;ENSG00000166501.14	protein_coding;protein_coding	2;2	17;17	PRKCB-210;PRKCB-210	None;None
16	24219274	exon;three_prime_UTR	24214658;24214817	24220611;24220611	+;+	PRKCB;PRKCB	ENSG00000166501.14;ENSG00000166501.14	protein_coding;protein_coding	2;2	17;17	PRKCB-210;PRKCB-210	None;None
16	24219274	exon;three_prime_UTR	24214658;24214817	24220611;24220611	+;+	PRKCB;PRKCB	ENSG00000166501.14;ENSG00000166501.14	protein_coding;protein_coding	2;2	17;17	PRKCB-210;PRKCB-210	None;None
16	24476474	exon	24472798	24479113	-	AC008938.1	ENSG00000260072.1	lncRNA	2	2	AC008938.1-201	1
16	2479327	exon	2476558	2482173	+	AC106820.4	ENSG00000260293.2	lncRNA	2	1	AC106820.4-201	NA
16	2504583	exon;three_prime_UTR;exon;three_prime_UTR	2500804;2500959;2500804;2500959	2505734;2505734;2505730;2505730	+;+;+;+	TBC1D24;TBC1D24;TBC1D24;TBC1D24	ENSG00000162065.14;ENSG00000162065.14;ENSG00000162065.14;ENSG00000162065.14	protein_coding;protein_coding;protein_coding;protein_coding	2;2;2;2	7;7;8;8	TBC1D24-204;TBC1D24-204;TBC1D24-210;TBC1D24-210	1;1;None;None
16	27210552	exon;CDS;exon;CDS;exon;CDS	27210093;27210124;27210093;27210093;27210124;27210124	27210621;27210621;27210621;27210621;27210621;27210621	+;+;+;+;+;+	KDM8;KDM8;KDM8;KDM8;KDM8;KDM8	ENSG00000155666.12;ENSG00000155666.12;ENSG00000155666.12;ENSG00000155666.12;ENSG00000155666.12;ENSG00000155666.12	protein_coding;protein_coding;protein_coding;protein_coding;protein_coding;protein_coding	2;2;2;2;2;2	2;2;2;2;1;1	KDM8-201;KDM8-201;KDM8-202;KDM8-202;KDM8-212;KDM8-212	1;1;2;2;1;1
16	28111263	exon	28111173	28111647	-	TPRKBP2	ENSG00000260452.1	processed_pseudogene	1	1	TPRKBP2-201	NA
16	28493743	exon;five_prime_UTR	28493495;28493495	28495550;28495550	-;-	CLN3;CLN3	ENSG00000188603.21;ENSG00000188603.21	protein_coding;protein_coding	2;2	1;1	CLN3-238;CLN3-238	5;5
16	28493775	exon;five_prime_UTR	28493495;28493495	28495550;28495550	-;-	CLN3;CLN3	ENSG00000188603.21;ENSG00000188603.21	protein_coding;protein_coding	2;2	1;1	CLN3-238;CLN3-238	5;5
16	29205610	exon	29204633	29205855	+	AC009093.7	ENSG00000279106.1	TEC	2	1	AC009093.7-201	NA
16	29799954	exon;CDS;exon;CDS;exon;CDS;exon;CDS	29799913;29799913;29799913;29799913;29799913;29799913;29799913;29799913	29800048;29800048;29800048;29800048;29800048;29800048;29800048;29800048	+;+;+;+;+;+;+;+	KIF22;KIF22;KIF22;KIF22;KIF22;KIF22;KIF22;KIF22	ENSG00000079616.13;ENSG00000079616.13;ENSG00000079616.13;ENSG00000079616.13;ENSG00000079616.13;ENSG00000079616.13;ENSG00000079616.13;ENSG00000079616.13	protein_coding;protein_coding;protein_coding;protein_coding;protein_coding;protein_coding;protein_coding;protein_coding	2;2;2;2;1;1;2;2	8;8;8;8;8;8;7;7	KIF22-203;KIF22-203;KIF22-201;KIF22-201;KIF22-202;KIF22-202;KIF22-208;KIF22-208	2;2;1;1;2;2;5;5
16	29815109	exon;three_prime_UTR;exon;three_prime_UTR;exon;three_prime_UTR;exon;three_prime_UTR;exon;three_prime_UTR;exon;three_prime_UTR;exon;three_prime_UTR;exon;three_prime_UTR	29812990;29813955;29814628;29814635;29814628;29814639;29814628;29814635;29812990;29813955;29814628;29814635;29814628;29814639;29814628;29814639	29815682;29815682;29815703;29815703;29815881;29815881;29815643;29815643;29815880;29815880;29815679;29815679;29815892;29815892;29815643;29815643	+;+;+;+;+;+;+;+;+;+;+;+;+;+;+;+	PRRT2;PRRT2;PRRT2;PRRT2;PRRT2;PRRT2;PRRT2;PRRT2;PRRT2;PRRT2;PRRT2;PRRT2;PRRT2;PRRT2;PRRT2;PRRT2	ENSG00000167371.21;ENSG00000167371.21;ENSG00000167371.21;ENSG00000167371.21;ENSG00000167371.21;ENSG00000167371.21;ENSG00000167371.21;ENSG00000167371.21;ENSG00000167371.21;ENSG00000167371.21;ENSG00000167371.21;ENSG00000167371.21;ENSG00000167371.21;ENSG00000167371.21;ENSG00000167371.21;ENSG00000167371.21	protein_coding;protein_coding;protein_coding;protein_coding;protein_coding;protein_coding;protein_coding;protein_coding;protein_coding;protein_coding;protein_coding;protein_coding;protein_coding;protein_coding;protein_coding;protein_coding	2;2;2;2;2;2;2;2;2;2;2;2;2;2;2;2	2;2;4;4;4;4;4;4;2;2;4;4;4;4;4;4	PRRT2-221;PRRT2-221;PRRT2-219;PRRT2-219;PRRT2-202;PRRT2-202;PRRT2-212;PRRT2-212;PRRT2-201;PRRT2-201;PRRT2-216;PRRT2-216;PRRT2-207;PRRT2-207;PRRT2-214;PRRT2-214	None;None;5;5;1;1;5;5;2;2;5;5;5;5;5;5
16	29820125	exon;three_prime_UTR	29819555;29819755	29822489;29822489	+;+	PAGR1;PAGR1	ENSG00000280789.2;ENSG00000280789.2	protein_coding;protein_coding	2;2	3;3	PAGR1-201;PAGR1-201	1;1
16	29821730	exon;three_prime_UTR	29819555;29819755	29822489;29822489	+;+	PAGR1;PAGR1	ENSG00000280789.2;ENSG00000280789.2	protein_coding;protein_coding	2;2	3;3	PAGR1-201;PAGR1-201	1;1
16	29971587	exon;three_prime_UTR	29971408;29971546	29972005;29972005	+;+	TMEM219;TMEM219	ENSG00000149932.17;ENSG00000149932.17	protein_coding;protein_coding	2;2	5;5	TMEM219-203;TMEM219-203	2;2
16	29995444	exon;CDS;exon;CDS	29995343;29995343;29995343;29995343	29995463;29995463;29995463;29995463	-;-;-;-	HIRIP3;HIRIP3;HIRIP3;HIRIP3	ENSG00000149929.16;ENSG00000149929.16;ENSG00000149929.16;ENSG00000149929.16	protein_coding;protein_coding;protein_coding;protein_coding	2;2;2;2	2;2;2;2	HIRIP3-201;HIRIP3-201;HIRIP3-204;HIRIP3-204	1;1;2;2
16	30005739	exon;three_prime_UTR;exon;three_prime_UTR;exon;three_prime_UTR	30005221;30005443;30005514;30005514;30005516;30005516	30005791;30005791;30006331;30006185;30006331;30006185	+;+;-;-;-;-	INO80E;INO80E;DOC2A;DOC2A;DOC2A;DOC2A	ENSG00000169592.15;ENSG00000169592.15;ENSG00000149927.18;ENSG00000149927.18;ENSG00000149927.18;ENSG00000149927.18	protein_coding;protein_coding;protein_coding;protein_coding;protein_coding;protein_coding	2;2;2;2;3;3	7;7;11;11;12;12	INO80E-207;INO80E-207;DOC2A-201;DOC2A-201;DOC2A-218;DOC2A-218	1;1;1;1;1;1
16	3027709	exon;three_prime_UTR;exon;three_prime_UTR;exon;three_prime_UTR;exon;three_prime_UTR;exon;three_prime_UTR;exon;three_prime_UTR	3027577;3027658;3027577;3027658;3027577;3027658;3027577;3027658;3027682;3027682;3027684;3027684	3027750;3027750;3027755;3027755;3027722;3027722;3027749;3027749;3028273;3028105;3028273;3028105	+;+;+;+;+;+;+;+;-;-;-;-	THOC6;THOC6;THOC6;THOC6;THOC6;THOC6;THOC6;THOC6;BICDL2;BICDL2;BICDL2;BICDL2	ENSG00000131652.14;ENSG00000131652.14;ENSG00000131652.14;ENSG00000131652.14;ENSG00000131652.14;ENSG00000131652.14;ENSG00000131652.14;ENSG00000131652.14;ENSG00000162069.16;ENSG00000162069.16;ENSG00000162069.16;ENSG00000162069.16	protein_coding;protein_coding;protein_coding;protein_coding;protein_coding;protein_coding;protein_coding;protein_coding;protein_coding;protein_coding;protein_coding;protein_coding	2;2;2;2;2;2;2;2;2;2;2;2	13;13;14;14;13;13;12;12;10;10;8;8	THOC6-202;THOC6-202;THOC6-207;THOC6-207;THOC6-209;THOC6-209;THOC6-201;THOC6-201;BICDL2-203;BICDL2-203;BICDL2-204;BICDL2-204	1;1;1;1;5;5;2;2;5;5;2;2
16	3037879	exon;exon;exon	3037835;3037400;3037403	3038012;3038005;3038005	+;-;-	AC108134.1;MMP25-AS1;MMP25-AS1	ENSG00000205890.3;ENSG00000261971.8;ENSG00000261971.8	lncRNA;lncRNA;lncRNA	2;2;2	7;7;6	AC108134.1-201;MMP25-AS1-209;MMP25-AS1-210	2;5;None
16	30535214	exon;five_prime_UTR;exon	30534197;30534680;30534752	30535347;30535347;30535480	-;-;+	ZNF747;ZNF747;AC002310.1	ENSG00000169955.7;ENSG00000169955.7;ENSG00000235560.4	protein_coding;protein_coding;lncRNA	2;2;2	1;1;1	ZNF747-201;ZNF747-201;AC002310.1-201	1;1;2
16	30664406	exon;CDS	30664215;30664215	30664516;30664516	+;+	FBRS;FBRS	ENSG00000156860.16;ENSG00000156860.16	protein_coding;protein_coding	2;2	7;7	FBRS-202;FBRS-202	5;5
16	30744906	exon;three_prime_UTR;exon;three_prime_UTR	30743782;30743782;30743782;30743944	30745169;30745169;30745196;30745196	+;+;+;+	AC106886.6;AC106886.6;TMEM265;TMEM265	ENSG00000282034.1;ENSG00000282034.1;ENSG00000281991.2;ENSG00000281991.2	protein_coding;protein_coding;protein_coding;protein_coding	2;2;2;2	31;31;3;3	AC106886.6-201;AC106886.6-201;TMEM265-201;TMEM265-201	2;2;1;1
16	30760116	exon;three_prime_UTR;exon;three_prime_UTR	30756804;30757098;30760037;30760037	30761176;30761176;30760453;30760218	+;+;-;-	PHKG2;PHKG2;CCDC189;CCDC189	ENSG00000156873.16;ENSG00000156873.16;ENSG00000196118.12;ENSG00000196118.12	protein_coding;protein_coding;protein_coding;protein_coding	2;2;2;2	10;10;4;4	PHKG2-204;PHKG2-204;CCDC189-211;CCDC189-211	1;1;1;1
16	30947243	exon;three_prime_UTR;exon;three_prime_UTR;exon;three_prime_UTR;exon;three_prime_UTR	30947052;30947231;30947052;30947231;30947052;30947231;30947052;30947231	30948776;30948776;30948783;30948783;30947449;30947449;30948018;30948018	+;+;+;+;+;+;+;+	FBXL19;FBXL19;FBXL19;FBXL19;FBXL19;FBXL19;FBXL19;FBXL19	ENSG00000099364.17;ENSG00000099364.17;ENSG00000099364.17;ENSG00000099364.17;ENSG00000099364.17;ENSG00000099364.17;ENSG00000099364.17;ENSG00000099364.17	protein_coding;protein_coding;protein_coding;protein_coding;protein_coding;protein_coding;protein_coding;protein_coding	1;1;2;2;2;2;2;2	11;11;11;11;11;11;9;9	FBXL19-203;FBXL19-203;FBXL19-201;FBXL19-201;FBXL19-204;FBXL19-204;FBXL19-206;FBXL19-206	2;2;5;5;2;2;5;5
16	31059867	exon	31059690	31062803	+	AC135050.1	ENSG00000232748.3	lncRNA	2	2	AC135050.1-201	2
16	31093726	exon	31093727	31095944	+	AC135050.7	ENSG00000280160.1	TEC	2	1	AC135050.7-201	NA
16	31508854	exon	31508464	31509036	+	AC026471.2	ENSG00000260625.3	lncRNA	2	1	AC026471.2-201	None
16	3206000	exon	3205341	3206554	+	AJ003147.2	ENSG00000262668.2	lncRNA	2	4	AJ003147.2-201	None
16	32379982	exon	32379071	32380049	-	ACTR3BP3	ENSG00000260327.2	processed_pseudogene	1	1	ACTR3BP3-201	NA
16	33698195	exon;exon	33698042;33698042	33698222;33698222	-;-	BMS1P8;BMS1P8	ENSG00000260518.2;ENSG00000260518.2	transcribed_unprocessed_pseudogene;transcribed_unprocessed_pseudogene	2;2	2;5	BMS1P8-201;BMS1P8-204	NA;None
16	33741840	exon	33741781	33741853	-	AC136428.4	ENSG00000282924.1	unprocessed_pseudogene	2	9	AC136428.4-201	NA
16	33948307	exon	33948278	33948548	-	AC140658.4	ENSG00000261607.1	unprocessed_pseudogene	2	1	AC140658.4-201	NA
16	35154067	exon	35148636	35154366	+	AC023824.6	ENSG00000280180.1	TEC	2	1	AC023824.6-201	NA
16	3661586	exon;three_prime_UTR	3657906;3657954	3665472;3665472	+;+	DNASE1;DNASE1	ENSG00000213918.10;ENSG00000213918.10	protein_coding;protein_coding	2;2	10;10	DNASE1-202;DNASE1-202	1;1
16	4427220	exon	4426902	4427380	+	AC012676.3	ENSG00000277170.1	lncRNA	2	1	AC012676.3-201	NA
16	46579361	exon;three_prime_UTR	46578591;46578591	46582054;46581728	-;-	SHCBP1;SHCBP1	ENSG00000171241.9;ENSG00000171241.9	protein_coding;protein_coding	2;2	13;13	SHCBP1-201;SHCBP1-201	1;1
16	46658418	exon;three_prime_UTR	46656132;46656132	46660651;46660471	-;-	VPS35;VPS35	ENSG00000069329.18;ENSG00000069329.18	protein_coding;protein_coding	2;2	17;17	VPS35-201;VPS35-201	1;1
16	46660191	exon;three_prime_UTR	46656132;46656132	46660651;46660471	-;-	VPS35;VPS35	ENSG00000069329.18;ENSG00000069329.18	protein_coding;protein_coding	2;2	17;17	VPS35-201;VPS35-201	1;1
16	46702974	exon;three_prime_UTR	46702282;46702282	46707763;46707703	-;-	MYLK3;MYLK3	ENSG00000140795.13;ENSG00000140795.13	protein_coding;protein_coding	2;2	13;13	MYLK3-201;MYLK3-201	1;1
16	46706598	exon;three_prime_UTR	46702282;46702282	46707763;46707703	-;-	MYLK3;MYLK3	ENSG00000140795.13;ENSG00000140795.13	protein_coding;protein_coding	2;2	13;13	MYLK3-201;MYLK3-201	1;1
16	46956074	exon;three_prime_UTR	46955362;46955362	46957220;46957028	-;-	DNAJA2;DNAJA2	ENSG00000069345.12;ENSG00000069345.12	protein_coding;protein_coding	2;2	9;9	DNAJA2-201;DNAJA2-201	1;1
16	47150187	exon	47150132	47150566	-	RPL23AP72	ENSG00000239840.1	processed_pseudogene	1	1	RPL23AP72-201	NA
16	4804022	exon;three_prime_UTR;exon;three_prime_UTR	4803203;4803203;4803203;4803203	4805310;4805235;4805310;4805235	-;-;-;-	GLYR1;GLYR1;GLYR1;GLYR1	ENSG00000140632.17;ENSG00000140632.17;ENSG00000140632.17;ENSG00000140632.17	protein_coding;protein_coding;protein_coding;protein_coding	2;2;2;2	15;15;16;16	GLYR1-202;GLYR1-202;GLYR1-201;GLYR1-201	2;2;1;1
16	49443521	exon	49443516	49444803	-	AC007861.1	ENSG00000262950.2	lncRNA	2	3	AC007861.1-202	None
16	49963332	exon	49963301	49963499	-	AC007603.3	ENSG00000283365.1	unitary_pseudogene	2	3	AC007603.3-201	NA
16	50129179	exon	50128893	50129904	+	AC007610.5	ENSG00000287444.1	lncRNA	2	2	AC007610.5-201	None
16	50230317	exon;three_prime_UTR;exon;three_prime_UTR	50229152;50229329;50229152;50229329	50235310;50235310;50235310;50235310	+;+;+;+	TENT4B;TENT4B;TENT4B;TENT4B	ENSG00000121274.13;ENSG00000121274.13;ENSG00000121274.13;ENSG00000121274.13	protein_coding;protein_coding;protein_coding;protein_coding	2;2;1;1	13;13;12;12	TENT4B-202;TENT4B-202;TENT4B-203;TENT4B-203	2;2;5;5
16	50230317	exon;three_prime_UTR;exon;three_prime_UTR	50229152;50229329;50229152;50229329	50235310;50235310;50235310;50235310	+;+;+;+	TENT4B;TENT4B;TENT4B;TENT4B	ENSG00000121274.13;ENSG00000121274.13;ENSG00000121274.13;ENSG00000121274.13	protein_coding;protein_coding;protein_coding;protein_coding	2;2;1;1	13;13;12;12	TENT4B-202;TENT4B-202;TENT4B-203;TENT4B-203	2;2;5;5
16	5161683	exon	5161330	5161942	+	AC074051.4	ENSG00000285567.2	lncRNA	2	3	AC074051.4-201	None
16	53389890	exon	53389886	53390563	+	AC007342.8	ENSG00000279741.1	TEC	2	1	AC007342.8-201	NA
16	53598578	exon;three_prime_UTR;exon;three_prime_UTR	53598153;53598153;53598153;53598153	53602188;53602075;53602188;53602075	-;-;-;-	RPGRIP1L;RPGRIP1L;RPGRIP1L;RPGRIP1L	ENSG00000103494.14;ENSG00000103494.14;ENSG00000103494.14;ENSG00000103494.14	protein_coding;protein_coding;protein_coding;protein_coding	2;2;2;2	27;27;25;25	RPGRIP1L-212;RPGRIP1L-212;RPGRIP1L-201;RPGRIP1L-201	None;None;5;5
16	53937824	exon;three_prime_UTR	53937249;53937259	53937889;53937889	+;+	FTO;FTO	ENSG00000140718.21;ENSG00000140718.21	protein_coding;protein_coding	2;2	9;9	FTO-214;FTO-214	5;5
16	54112554	exon;three_prime_UTR;exon;three_prime_UTR;exon;three_prime_UTR	54111762;54111916;54111762;54111916;54111762;54111916	54112987;54112987;54114463;54114463;54121941;54121941	+;+;+;+;+;+	FTO;FTO;FTO;FTO;FTO;FTO	ENSG00000140718.21;ENSG00000140718.21;ENSG00000140718.21;ENSG00000140718.21;ENSG00000140718.21;ENSG00000140718.21	protein_coding;protein_coding;protein_coding;protein_coding;protein_coding;protein_coding	2;2;2;2;2;2	4;4;3;3;9;9	FTO-203;FTO-203;FTO-204;FTO-204;FTO-206;FTO-206	5;5;1;1;1;1
16	54629257	exon	54628963	54629598	-	AC007491.1	ENSG00000283258.2	lncRNA	2	5	AC007491.1-201	5
16	54922416	exon	54918967	54925213	-	CRNDE	ENSG00000245694.10	lncRNA	2	2	CRNDE-203	2
16	55702761	exon;three_prime_UTR;exon;three_prime_UTR;exon;three_prime_UTR	55702323;55702347;55702323;55702347;55702323;55702347	55703750;55703750;55703788;55703788;55703791;55703791	+;+;+;+;+;+	SLC6A2;SLC6A2;SLC6A2;SLC6A2;SLC6A2;SLC6A2	ENSG00000103546.18;ENSG00000103546.18;ENSG00000103546.18;ENSG00000103546.18;ENSG00000103546.18;ENSG00000103546.18	protein_coding;protein_coding;protein_coding;protein_coding;protein_coding;protein_coding	2;2;2;2;2;2	14;14;14;14;12;12	SLC6A2-203;SLC6A2-203;SLC6A2-202;SLC6A2-202;SLC6A2-206;SLC6A2-206	5;5;1;1;2;2
16	55702761	exon;three_prime_UTR;exon;three_prime_UTR;exon;three_prime_UTR	55702323;55702347;55702323;55702347;55702323;55702347	55703750;55703750;55703788;55703788;55703791;55703791	+;+;+;+;+;+	SLC6A2;SLC6A2;SLC6A2;SLC6A2;SLC6A2;SLC6A2	ENSG00000103546.18;ENSG00000103546.18;ENSG00000103546.18;ENSG00000103546.18;ENSG00000103546.18;ENSG00000103546.18	protein_coding;protein_coding;protein_coding;protein_coding;protein_coding;protein_coding	2;2;2;2;2;2	14;14;14;14;12;12	SLC6A2-203;SLC6A2-203;SLC6A2-202;SLC6A2-202;SLC6A2-206;SLC6A2-206	5;5;1;1;2;2
16	56476433	exon;three_prime_UTR	56476044;56476206	56479104;56479104	+;+	OGFOD1;OGFOD1	ENSG00000087263.17;ENSG00000087263.17	protein_coding;protein_coding	2;2	13;13	OGFOD1-207;OGFOD1-207	1;1
16	56590223	exon;three_prime_UTR	56589870;56590118	56590366;56590366	+;+	MT3;MT3	ENSG00000087250.9;ENSG00000087250.9	protein_coding;protein_coding	2;2	2;2	MT3-206;MT3-206	2;2
16	56627048	exon;three_prime_UTR;exon;three_prime_UTR;exon;three_prime_UTR	56626880;56626972;56626466;56626822;56626880;56626972	56627112;56627112;56627112;56627112;56627112;56627112	+;+;+;+;+;+	MT1E;MT1E;MT1E;MT1E;MT1E;MT1E	ENSG00000169715.15;ENSG00000169715.15;ENSG00000169715.15;ENSG00000169715.15;ENSG00000169715.15;ENSG00000169715.15	protein_coding;protein_coding;protein_coding;protein_coding;protein_coding;protein_coding	2;2;2;2;2;2	3;3;2;2;2;2	MT1E-201;MT1E-201;MT1E-202;MT1E-202;MT1E-203;MT1E-203	1;1;1;1;2;2
16	56684123	exon;three_prime_UTR	56683958;56684050	56684196;56684196	+;+	MT1X;MT1X	ENSG00000187193.9;ENSG00000187193.9	protein_coding;protein_coding	2;2	3;3	MT1X-201;MT1X-201	1;1
16	57013879	exon	57013071	57014100	-	AC023825.1	ENSG00000259922.1	processed_pseudogene	1	1	AC023825.1-201	NA
16	57249761	exon;three_prime_UTR	57249039;57249039	57256063;57256009	-;-	PLLP;PLLP	ENSG00000102934.10;ENSG00000102934.10	protein_coding;protein_coding	2;2	4;4	PLLP-205;PLLP-205	5;5
16	576283	exon;CDS;exon;three_prime_UTR	576134;576134;575839;576050	577234;576503;577217;577217	+;+;+;+	PIGQ;PIGQ;PIGQ;PIGQ	ENSG00000007541.17;ENSG00000007541.17;ENSG00000007541.17;ENSG00000007541.17	protein_coding;protein_coding;protein_coding;protein_coding	2;2;2;2	4;4;3;3	PIGQ-206;PIGQ-206;PIGQ-209;PIGQ-209	3;3;1;1
16	58542472	exon;CDS;exon;CDS	58542428;58542428;58542428;58542428	58542568;58542568;58542568;58542568	-;-;-;-	CNOT1;CNOT1;CNOT1;CNOT1	ENSG00000125107.18;ENSG00000125107.18;ENSG00000125107.18;ENSG00000125107.18	protein_coding;protein_coding;protein_coding;protein_coding	2;2;2;2	32;32;32;32	CNOT1-201;CNOT1-201;CNOT1-216;CNOT1-216	1;1;1;1
16	58666393	exon;three_prime_UTR;exon;three_prime_UTR;exon;three_prime_UTR	58665109;58665109;58665109;58665109;58666372;58666372	58667487;58667384;58667487;58667384;58667487;58667305	-;-;-;-;-;-	SLC38A7;SLC38A7;SLC38A7;SLC38A7;SLC38A7;SLC38A7	ENSG00000103042.9;ENSG00000103042.9;ENSG00000103042.9;ENSG00000103042.9;ENSG00000103042.9;ENSG00000103042.9	protein_coding;protein_coding;protein_coding;protein_coding;protein_coding;protein_coding	2;2;2;2;1;1	11;11;12;12;8;8	SLC38A7-215;SLC38A7-215;SLC38A7-201;SLC38A7-201;SLC38A7-206;SLC38A7-206	1;1;1;1;1;1
16	60046426	exon	60046228	60046432	+	LINC02141	ENSG00000261807.2	lncRNA	2	3	LINC02141-201	1
16	60365146	exon	60365022	60365643	+	AC009081.2	ENSG00000261436.6	lncRNA	2	3	AC009081.2-201	2
16	61055938	exon	61055399	61055964	-	RPS27AP16	ENSG00000224631.4	transcribed_processed_pseudogene	2	1	RPS27AP16-202	NA
16	63521630	exon	63520857	63521778	-	AC138305.1	ENSG00000260658.6	lncRNA	2	3	AC138305.1-204	None
16	63755800	exon	63754606	63755884	+	LINC02165	ENSG00000261014.2	lncRNA	2	4	LINC02165-201	3
16	64946591	exon;three_prime_UTR;exon;three_prime_UTR	64943753;64943753;64943753;64943753	64948099;64948090;64948099;64947602	-;-;-;-	CDH11;CDH11;CDH11;CDH11	ENSG00000140937.14;ENSG00000140937.14;ENSG00000140937.14;ENSG00000140937.14	protein_coding;protein_coding;protein_coding;protein_coding	2;2;2;2	14;14;13;13	CDH11-202;CDH11-202;CDH11-201;CDH11-201	1;1;1;1
16	64983137	exon	64981123	64983227	-	AC010533.1	ENSG00000278893.1	TEC	2	1	AC010533.1-201	NA
16	66619154	exon;three_prime_UTR	66614750;66614750	66622222;66622057	-;-	CMTM4;CMTM4	ENSG00000183723.13;ENSG00000183723.13	protein_coding;protein_coding	2;2	4;4	CMTM4-202;CMTM4-202	1;1
16	66721738	exon;three_prime_UTR;exon	66720893;66720893;66720897	66723822;66723721;66721990	-;-;+	DYNC1LI2;DYNC1LI2;AC018557.1	ENSG00000135720.13;ENSG00000135720.13;ENSG00000260465.1	protein_coding;protein_coding;lncRNA	2;2;2	13;13;1	DYNC1LI2-201;DYNC1LI2-201;AC018557.1-201	1;1;5
16	66738925	exon	66738773	66739722	+	AC018557.2	ENSG00000260558.2	lncRNA	2	2	AC018557.2-201	None
16	66944324	exon;three_prime_UTR;exon;three_prime_UTR	66943839;66944026;66943839;66944026	66945069;66945069;66945096;66945096	+;+;+;+	CES2;CES2;CES2;CES2	ENSG00000172831.14;ENSG00000172831.14;ENSG00000172831.14;ENSG00000172831.14	protein_coding;protein_coding;protein_coding;protein_coding	2;2;2;2	12;12;12;12	CES2-202;CES2-202;CES2-201;CES2-201	1;1;1;1
16	66967700	exon;five_prime_UTR	66967475;66967475	66967899;66967899	+;+	CES3;CES3	ENSG00000172828.13;ENSG00000172828.13	protein_coding;protein_coding	1;1	1;1	CES3-203;CES3-203	2;2
16	66973128	exon;three_prime_UTR;exon;three_prime_UTR;exon;three_prime_UTR	66972854;66973050;66972854;66973050;66972854;66973050	66975096;66975096;66975149;66975149;66975148;66975148	+;+;+;+;+;+	CES3;CES3;CES3;CES3;CES3;CES3	ENSG00000172828.13;ENSG00000172828.13;ENSG00000172828.13;ENSG00000172828.13;ENSG00000172828.13;ENSG00000172828.13	protein_coding;protein_coding;protein_coding;protein_coding;protein_coding;protein_coding	2;2;2;2;1;1	13;13;13;13;6;6	CES3-202;CES3-202;CES3-201;CES3-201;CES3-203;CES3-203	1;1;1;1;2;2
16	67198847	exon;three_prime_UTR	67198008;67198124	67198918;67198918	+;+	E2F4;E2F4	ENSG00000205250.9;ENSG00000205250.9	protein_coding;protein_coding	2;2	10;10	E2F4-201;E2F4-201	1;1
16	67229534	exon;three_prime_UTR	67229389;67229389	67229718;67229635	-;-	FHOD1;FHOD1	ENSG00000135723.14;ENSG00000135723.14	protein_coding;protein_coding	2;2	22;22	FHOD1-201;FHOD1-201	1;1
16	68023344	exon;five_prime_UTR;exon;five_prime_UTR;exon;five_prime_UTR	68023253;68023253;68023284;68023284;68023292;68023292	68023351;68023351;68023351;68023351;68023351;68023351	+;+;+;+;+;+	DUS2;DUS2;DUS2;DUS2;DUS2;DUS2	ENSG00000167264.18;ENSG00000167264.18;ENSG00000167264.18;ENSG00000167264.18;ENSG00000167264.18;ENSG00000167264.18	protein_coding;protein_coding;protein_coding;protein_coding;protein_coding;protein_coding	2;2;2;2;2;2	1;1;1;1;1;1	DUS2-201;DUS2-201;DUS2-207;DUS2-207;DUS2-202;DUS2-202	2;2;1;1;2;2
16	68224729	exon	68224713	68227734	+	AC020978.7	ENSG00000263276.1	lncRNA	2	1	AC020978.7-201	NA
16	692506	exon;exon;three_prime_UTR;exon;three_prime_UTR	692305;692500;692500;692507;692507	692554;694423;694274;694423;694274	+;-;-;-;-	Z92544.1;FBXL16;FBXL16;FBXL16;FBXL16	ENSG00000261659.2;ENSG00000127585.12;ENSG00000127585.12;ENSG00000127585.12;ENSG00000127585.12	lncRNA;protein_coding;protein_coding;protein_coding;protein_coding	2;2;2;3;3	2;6;6;7;7	Z92544.1-202;FBXL16-202;FBXL16-202;FBXL16-201;FBXL16-201	3;5;5;1;1
16	69300989	exon;three_prime_UTR	69300832;69300925	69309052;69309052	+;+	SNTB2;SNTB2	ENSG00000168807.16;ENSG00000168807.16	protein_coding;protein_coding	2;2	7;7	SNTB2-201;SNTB2-201	1;1
16	69301946	exon;three_prime_UTR	69300832;69300925	69309052;69309052	+;+	SNTB2;SNTB2	ENSG00000168807.16;ENSG00000168807.16	protein_coding;protein_coding	2;2	7;7	SNTB2-201;SNTB2-201	1;1
16	69302454	exon;three_prime_UTR	69300832;69300925	69309052;69309052	+;+	SNTB2;SNTB2	ENSG00000168807.16;ENSG00000168807.16	protein_coding;protein_coding	2;2	7;7	SNTB2-201;SNTB2-201	1;1
16	69697877	exon;three_prime_UTR;exon;three_prime_UTR	69696360;69696360;69696360;69696360	69704654;69704654;69704666;69704666	+;+;+;+	NFAT5;NFAT5;NFAT5;NFAT5	ENSG00000102908.22;ENSG00000102908.22;ENSG00000102908.22;ENSG00000102908.22	protein_coding;protein_coding;protein_coding;protein_coding	2;2;2;2	15;15;14;14	NFAT5-201;NFAT5-201;NFAT5-202;NFAT5-202	1;1;1;1
16	69709933	exon;three_prime_UTR;exon;three_prime_UTR;exon	69709401;69709401;69709401;69709401;69709874	69711281;69710975;69711281;69710975;69710101	-;-;-;-;+	NQO1;NQO1;NQO1;NQO1;AC092115.2	ENSG00000181019.13;ENSG00000181019.13;ENSG00000181019.13;ENSG00000181019.13;ENSG00000261602.1	protein_coding;protein_coding;protein_coding;protein_coding;lncRNA	2;2;1;1;2	6;6;5;5;1	NQO1-201;NQO1-201;NQO1-203;NQO1-203;AC092115.2-201	1;1;1;1;3
16	70249032	exon;three_prime_UTR	70246778;70246778	70251940;70251081	-;-	EXOSC6;EXOSC6	ENSG00000223496.3;ENSG00000223496.3	protein_coding;protein_coding	2;2	1;1	EXOSC6-201;EXOSC6-201	NA;NA
16	70349413	exon	70349085	70349597	-	AC012184.4	ENSG00000285710.1	lncRNA	2	6	AC012184.4-201	None
16	70473209	exon;CDS;exon;CDS;exon;CDS	70472983;70473098;70472983;70472983;70472983;70472983	70473353;70473353;70473353;70473353;70473353;70473353	+;+;+;+;+;+	FCSK;FCSK;FCSK;FCSK;FCSK;FCSK	ENSG00000157353.17;ENSG00000157353.17;ENSG00000157353.17;ENSG00000157353.17;ENSG00000157353.17;ENSG00000157353.17	protein_coding;protein_coding;protein_coding;protein_coding;protein_coding;protein_coding	1;1;2;2;2;2	7;7;15;15;15;15	FCSK-207;FCSK-207;FCSK-201;FCSK-201;FCSK-202;FCSK-202	2;2;1;1;2;2
16	71566469	exon;three_prime_UTR	71565660;71565660	71568284;71568143	-;-	TAT;TAT	ENSG00000198650.11;ENSG00000198650.11	protein_coding;protein_coding	2;2	12;12	TAT-201;TAT-201	1;1
16	71635342	exon;three_prime_UTR	71634193;71634804	71636465;71636465	+;+	MARVELD3;MARVELD3	ENSG00000140832.10;ENSG00000140832.10	protein_coding;protein_coding	2;2	3;3	MARVELD3-201;MARVELD3-201	1;1
16	71729451	exon;three_prime_UTR	71729000;71729000	71733159;71733057	-;-	AP1G1;AP1G1	ENSG00000166747.13;ENSG00000166747.13	protein_coding;protein_coding	2;2	23;23	AP1G1-201;AP1G1-201	1;1
16	72790923	exon	72787163	72791624	+	AC004943.2	ENSG00000259768.6	lncRNA	2	5	AC004943.2-201	3
16	73568305	exon	73567596	73569309	+	AC092114.1	ENSG00000260848.2	lncRNA	2	3	AC092114.1-203	None
16	73809716	exon	73809240	73809733	+	AC087565.2	ENSG00000283457.2	lncRNA	2	4	AC087565.2-201	5
16	73949108	exon	73948811	73949871	-	AC138627.1	ENSG00000261404.7	lncRNA	2	5	AC138627.1-203	None
16	74290256	exon	74289593	74291052	-	AC009120.5	ENSG00000275236.1	lncRNA	2	1	AC009120.5-201	NA
16	75193022	exon	75192465	75193247	-	AC009078.1	ENSG00000213318.4	processed_pseudogene	1	1	AC009078.1-201	NA
16	75434486	exon	75433836	75436392	+	AC009163.7	ENSG00000274220.1	lncRNA	2	1	AC009163.7-201	NA
16	76559420	exon;three_prime_UTR	76558490;76558684	76560757;76560757	+;+	CNTNAP4;CNTNAP4	ENSG00000152910.19;ENSG00000152910.19	protein_coding;protein_coding	2;2	24;24	CNTNAP4-207;CNTNAP4-207	1;1
16	77658147	exon	77657174	77660570	+	AC092724.1	ENSG00000278862.1	TEC	2	1	AC092724.1-201	NA
16	79598471	exon;three_prime_UTR	79594331;79594331	79600714;79598780	-;-	MAF;MAF	ENSG00000178573.7;ENSG00000178573.7	protein_coding;protein_coding	2;2	1;1	MAF-202;MAF-202	NA;NA
16	79599183	exon;CDS;exon;CDS;exon;CDS	79598785;79598785;79598785;79598785;79594331;79598781	79599902;79599902;79600737;79599902;79600714;79599902	-;-;-;-;-;-	MAF;MAF;MAF;MAF;MAF;MAF	ENSG00000178573.7;ENSG00000178573.7;ENSG00000178573.7;ENSG00000178573.7;ENSG00000178573.7;ENSG00000178573.7	protein_coding;protein_coding;protein_coding;protein_coding;protein_coding;protein_coding	2;2;2;2;2;2	1;1;1;1;1;1	MAF-203;MAF-203;MAF-201;MAF-201;MAF-202;MAF-202	5;5;1;1;NA;NA
16	80845723	exon	80845631	80845723	-	ARLNC1	ENSG00000260896.6	lncRNA	2	1	ARLNC1-246	None
16	81031185	exon	81030770	81031485	+	AC092718.4	ENSG00000261061.1	lncRNA	2	1	AC092718.4-201	NA
16	81188899	exon;CDS;exon;CDS	81188881;81188881;81188881;81188881	81188998;81188998;81188998;81188998	-;-;-;-	PKD1L2;PKD1L2;PKD1L2;PKD1L2	ENSG00000166473.17;ENSG00000166473.17;ENSG00000166473.17;ENSG00000166473.17	polymorphic_pseudogene;polymorphic_pseudogene;polymorphic_pseudogene;polymorphic_pseudogene	2;2;3;3	10;10;10;10	PKD1L2-203;PKD1L2-203;PKD1L2-202;PKD1L2-202	1;1;5;5
16	83705110	exon	83704308	83707811	-	AC009063.3	ENSG00000261103.3	lncRNA	2	1	AC009063.3-201	None
16	84041128	exon	84040790	84042109	+	AC040169.4	ENSG00000285792.1	lncRNA	2	1	AC040169.4-201	None
16	84042552	exon;five_prime_UTR	84042551;84042551	84042795;84042795	-;-	SLC38A8;SLC38A8	ENSG00000166558.11;ENSG00000166558.11	protein_coding;protein_coding	2;2	1;1	SLC38A8-201;SLC38A8-201	5;5
16	84459141	exon;CDS;exon;CDS	84459120;84459120;84459120;84459120	84459188;84459188;84459188;84459188	+;+;+;+	ATP2C2;ATP2C2;ATP2C2;ATP2C2	ENSG00000064270.13;ENSG00000064270.13;ENSG00000064270.13;ENSG00000064270.13	protein_coding;protein_coding;protein_coding;protein_coding	1;1;2;2	22;22;22;22	ATP2C2-202;ATP2C2-202;ATP2C2-201;ATP2C2-201	1;1;1;1
16	84477590	exon;three_prime_UTR	84476355;84476355	84480026;84479912	-;-	MEAK7;MEAK7	ENSG00000140950.16;ENSG00000140950.16	protein_coding;protein_coding	2;2	8;8	MEAK7-201;MEAK7-201	1;1
16	84478110	exon;three_prime_UTR	84476355;84476355	84480026;84479912	-;-	MEAK7;MEAK7	ENSG00000140950.16;ENSG00000140950.16	protein_coding;protein_coding	2;2	8;8	MEAK7-201;MEAK7-201	1;1
16	84565770	exon;three_prime_UTR;exon;three_prime_UTR	84565596;84565596;84565659;84565659	84566955;84566844;84566955;84566844	-;-;-;-	COTL1;COTL1;COTL1;COTL1	ENSG00000103187.8;ENSG00000103187.8;ENSG00000103187.8;ENSG00000103187.8	protein_coding;protein_coding;protein_coding;protein_coding	2;2;2;2	4;4;3;3	COTL1-201;COTL1-201;COTL1-203;COTL1-203	1;1;5;5
16	85678025	exon;three_prime_UTR	85676198;85676198	85678337;85678211	-;-	GINS2;GINS2	ENSG00000131153.9;ENSG00000131153.9	protein_coding;protein_coding	2;2	5;5	GINS2-201;GINS2-201	1;1
16	85838	exon;three_prime_UTR;exon;three_prime_UTR;exon;three_prime_UTR;exon;three_prime_UTR	85401;85778;85401;85778;85386;85386;85801;85801	85851;85851;85842;85842;86870;86704;86870;86704	+;+;+;+;-;-;-;-	MPG;MPG;MPG;MPG;NPRL3;NPRL3;NPRL3;NPRL3	ENSG00000103152.12;ENSG00000103152.12;ENSG00000103152.12;ENSG00000103152.12;ENSG00000103148.17;ENSG00000103148.17;ENSG00000103148.17;ENSG00000103148.17	protein_coding;protein_coding;protein_coding;protein_coding;protein_coding;protein_coding;protein_coding;protein_coding	3;3;2;2;2;2;2;2	4;4;5;5;14;14;12;12	MPG-203;MPG-203;MPG-201;MPG-201;NPRL3-211;NPRL3-211;NPRL3-201;NPRL3-201	2;2;3;3;5;5;1;1
16	85963973	exon	85963328	85964107	-	AC092723.4	ENSG00000285040.1	lncRNA	2	3	AC092723.4-201	None
16	86721051	exon	86720575	86721196	-	LINC02189	ENSG00000260026.3	lncRNA	2	2	LINC02189-207	None
16	87402465	exon;three_prime_UTR	87402175;87402307	87402609;87402609	+;+	MAP1LC3B;MAP1LC3B	ENSG00000140941.14;ENSG00000140941.14	protein_coding;protein_coding	2;2	3;3	MAP1LC3B-204;MAP1LC3B-204	2;2
16	88719277	exon	88718615	88720459	+	AC138028.4	ENSG00000260121.1	lncRNA	2	1	AC138028.4-201	NA
16	89215290	exon	89215211	89217653	-	AC009113.1	ENSG00000259877.2	lncRNA	2	1	AC009113.1-201	NA
16	89296580	exon	89296128	89296764	+	AC137932.1	ENSG00000260279.4	lncRNA	2	1	AC137932.1-201	3
16	89453594	exon	89453258	89453678	+	AC092120.3	ENSG00000287351.1	lncRNA	2	5	AC092120.3-201	None
16	89563028	exon;CDS;exon;CDS;exon;CDS;exon;CDS	89562884;89562884;89562884;89562884;89562884;89562884;89562884;89562884	89563080;89563042;89564542;89563042;89563952;89563042;89564542;89563042	+;+;+;+;+;+;+;+	RPL13;RPL13;RPL13;RPL13;RPL13;RPL13;RPL13;RPL13	ENSG00000167526.14;ENSG00000167526.14;ENSG00000167526.14;ENSG00000167526.14;ENSG00000167526.14;ENSG00000167526.14;ENSG00000167526.14;ENSG00000167526.14	protein_coding;protein_coding;protein_coding;protein_coding;protein_coding;protein_coding;protein_coding;protein_coding	2;2;2;2;2;2;2;2	6;6;6;6;7;7;5;5	RPL13-214;RPL13-214;RPL13-201;RPL13-201;RPL13-204;RPL13-204;RPL13-202;RPL13-202	3;3;1;1;2;2;1;1
16	8966965	exon	8966753	8966990	+	AC022167.3	ENSG00000260979.1	lncRNA	2	2	AC022167.3-201	2
16	89890301	exon;three_prime_UTR	89889228;89889265	89890633;89890633	+;+	TCF25;TCF25	ENSG00000141002.20;ENSG00000141002.20	protein_coding;protein_coding	2;2	6;6	TCF25-225;TCF25-225	5;5
16	89969984	exon;three_prime_UTR	89969773;89969773	89972832;89971358	-;-	CENPBD1;CENPBD1	ENSG00000177946.6;ENSG00000177946.6	protein_coding;protein_coding	3;3	1;1	CENPBD1-201;CENPBD1-201	NA;NA
16	90040286	exon	90039761	90040417	-	URAHP	ENSG00000222019.7	transcribed_unprocessed_pseudogene	2	5	URAHP-202	1
16	90186025	exon;exon	90185997;90185997	90186055;90186154	+;+	LINC02193;LINC02193	ENSG00000260923.7;ENSG00000260923.7	lncRNA;lncRNA	3;2	3;1	LINC02193-207;LINC02193-203	5;5
16	90795	exon	90631	91102	+	Z69720.1	ENSG00000269482.1	lncRNA	2	1	Z69720.1-201	NA
16	9119780	exon;three_prime_UTR	9116668;9116913	9121635;9121635	+;+	C16orf72;C16orf72	ENSG00000182831.12;ENSG00000182831.12	protein_coding;protein_coding	2;2	4;4	C16orf72-201;C16orf72-201	1;1
16	9355649	exon	9355588	9355780	+	LINC02177	ENSG00000261617.2	lncRNA	2	1	LINC02177-201	1
17	1004384	exon;three_prime_UTR;exon;three_prime_UTR	1003518;1003518;1003527;1003527	1006169;1006079;1006169;1006079	-;-;-;-	ABR;ABR;ABR;ABR	ENSG00000159842.15;ENSG00000159842.15;ENSG00000159842.15;ENSG00000159842.15	protein_coding;protein_coding;protein_coding;protein_coding	2;2;2;2	23;23;23;23	ABR-202;ABR-202;ABR-205;ABR-205	1;1;2;2
17	10409123	exon;CDS	10409097;10409097	10409164;10409164	-;-	MYH8;MYH8	ENSG00000133020.4;ENSG00000133020.4	protein_coding;protein_coding	2;2	17;17	MYH8-201;MYH8-201	5;5
17	10463146	exon;CDS	10463090;10463090	10463188;10463188	-;-	MYH4;MYH4	ENSG00000264424.1;ENSG00000264424.1	protein_coding;protein_coding	2;2	10;10	MYH4-201;MYH4-201	1;1
17	10715348	exon;three_prime_UTR;exon;three_prime_UTR	10713295;10713295;10714676;10714676	10715588;10715452;10715588;10715452	-;-;-;-	TMEM220;TMEM220;TMEM220;TMEM220	ENSG00000187824.9;ENSG00000187824.9;ENSG00000187824.9;ENSG00000187824.9	protein_coding;protein_coding;protein_coding;protein_coding	2;2;2;2	6;6;5;5	TMEM220-201;TMEM220-201;TMEM220-202;TMEM220-202	1;1;1;1
17	10715436	exon;three_prime_UTR;exon;three_prime_UTR;exon;three_prime_UTR	10715422;10715422;10713295;10713295;10714676;10714676	10715588;10715452;10715588;10715452;10715588;10715452	-;-;-;-;-;-	TMEM220;TMEM220;TMEM220;TMEM220;TMEM220;TMEM220	ENSG00000187824.9;ENSG00000187824.9;ENSG00000187824.9;ENSG00000187824.9;ENSG00000187824.9;ENSG00000187824.9	protein_coding;protein_coding;protein_coding;protein_coding;protein_coding;protein_coding	1;1;2;2;2;2	4;4;6;6;5;5	TMEM220-203;TMEM220-203;TMEM220-201;TMEM220-201;TMEM220-202;TMEM220-202	2;2;1;1;1;1
17	12642833	exon	12642398	12642854	+	LINC00670	ENSG00000179136.7	lncRNA	2	5	LINC00670-203	3
17	1423152	exon;three_prime_UTR;exon;three_prime_UTR;exon;CDS	1420689;1420689;1420693;1420693;1422226;1422913	1423650;1423642;1423650;1423512;1423185;1423185	-;-;-;-;-;-	CRK;CRK;CRK;CRK;CRK;CRK	ENSG00000167193.8;ENSG00000167193.8;ENSG00000167193.8;ENSG00000167193.8;ENSG00000167193.8;ENSG00000167193.8	protein_coding;protein_coding;protein_coding;protein_coding;protein_coding;protein_coding	2;2;2;2;2;2	3;3;3;3;3;3	CRK-202;CRK-202;CRK-201;CRK-201;CRK-204;CRK-204	1;1;1;1;5;5
17	15062630	exon	15062087	15066434	-	AC005772.2	ENSG00000287307.1	lncRNA	2	2	AC005772.2-201	None
17	15237237	exon;three_prime_UTR	15235787;15235787	15239611;15239411	-;-	PMP22;PMP22	ENSG00000109099.16;ENSG00000109099.16	protein_coding;protein_coding	2;2	4;4	PMP22-204;PMP22-204	2;2
17	15583891	exon;three_prime_UTR	15583886;15583886	15589227;15588974	-;-	CDRT1;CDRT1	ENSG00000241322.11;ENSG00000241322.11	protein_coding;protein_coding	2;2	12;12	CDRT1-204;CDRT1-204	1;1
17	15587978	exon;three_prime_UTR	15583886;15583886	15589227;15588974	-;-	CDRT1;CDRT1	ENSG00000241322.11;ENSG00000241322.11	protein_coding;protein_coding	2;2	12;12	CDRT1-204;CDRT1-204	1;1
17	15704288	exon	15704232	15704900	-	UBE2SP1	ENSG00000233966.1	processed_pseudogene	2	1	UBE2SP1-201	NA
17	15719989	exon;three_prime_UTR;exon;three_prime_UTR;exon;three_prime_UTR;exon;three_prime_UTR;exon;three_prime_UTR	15716059;15717291;15716059;15717291;15716000;15716017;15716059;15717291;15716059;15717291	15720782;15720782;15720782;15720782;15720787;15720787;15720787;15720787;15720787;15720787	+;+;+;+;+;+;+;+;+;+	ZNF286A;ZNF286A;ZNF286A;ZNF286A;ZNF286A;ZNF286A;ZNF286A;ZNF286A;ZNF286A;ZNF286A	ENSG00000187607.16;ENSG00000187607.16;ENSG00000187607.16;ENSG00000187607.16;ENSG00000187607.16;ENSG00000187607.16;ENSG00000187607.16;ENSG00000187607.16;ENSG00000187607.16;ENSG00000187607.16	protein_coding;protein_coding;protein_coding;protein_coding;protein_coding;protein_coding;protein_coding;protein_coding;protein_coding;protein_coding	3;3;3;3;2;2;2;2;2;2	6;6;5;5;6;6;6;6;5;5	ZNF286A-203;ZNF286A-203;ZNF286A-221;ZNF286A-221;ZNF286A-202;ZNF286A-202;ZNF286A-218;ZNF286A-218;ZNF286A-204;ZNF286A-204	5;5;3;3;1;1;1;1;1;1
17	15817980	exon	15817528	15818077	-	LINC02087	ENSG00000237057.3	lncRNA	2	1	LINC02087-201	2
[truncated: 3,727 more rows]

## Sheet: B
B. MEIs in ENCODE candidate cis-Regulatory Elements (Figure 6B).
MEI CHR	MEI POS	cCRE CHR	cCRE Start	cCRE End	cCRE Name	cCRE ENCODE Label	cCRE Description
1	866135	1	866116	866333	EH38E1310194	dELS	distal enhancer-like signature
1	1692916	1	1692751	1693020	EH38E1311122	PLS	promoter-like signature
1	1746195	1	1746026	1746299	EH38E1311138	PLS	promoter-like signature
[truncated: 11,583 more rows]

## Sheet: C
Legends for Supplemental Table 6.
[truncated: 39 more rows]
