# Supplementary material for: Mutagenesis of human genomes by endogenous mobile elements on a population scale
Source: HighWire-hosted journal article supplement (doi:10.1101/gr.275323.121), 2021-11-12
Supplement: Supplemental_Table_S7.xlsx [file Supplemental_Table_S7.xlsx]

## Sheet: A
Supplemental_Table_7.xlxs. MEIs that disrupt genes implicated in various diseases.
A. Disease categories with MEIs from our collection disrupting OMIM genes (Figure 6C).
Diseases category	OMIM phenotypes
Cancer	Leukemia, Lymphoma, Multiple, myeloma, Mesothelioma, Glioblastoma, Neuroblastoma, carcinoma, melanoma, tumor
Degenerative diseases	Amyotrophic, lateral, sclerosis, frontotemporal, Alzheimer, disease, Parkinson, disease, Huntington, disease, Ataxia, Multiple, sclerosis, Spastic, paraplegia, Muscular, dystrophy
Intellectual disability	Mental, retardation
Deafness	Deafness
Heart disease	Cardiomyopathy, Congestive, heart, failure, Coronary, artery, disease, Coronary, heart, disease, Long, QT, Short, QT, Hypertension, Heart, disease
Retinal diseases	Retinitis, pigmentosa, Macular, degeneration, Night, blindness
Epilepsy, Epileptic encephalopathy	Epilepsy, Epileptic, encephalopathy
Anemia & Bleeding disorders	Anemia, Bleeding, disorder, hemophilia
Immunodeficiency	Immunodeficiency
Diabetes & Insulin Resistance	Diabetes, Insulin, resistance
Charcot-Marie-Tooth disease	Charcot-Marie-Tooth, disease
Mitochondrial diseases	Mitochondrial, DNA, depletion, Mitochondrial, complex, Mitochondrial, myopathy
Autoimmunne disease, arthritis, Lupus	arthritis, Autoimmune, disease, Lupus
Obesity	Obesity
Schizophrenia, Anxiety, OCD, MDD	Schizophrenia, Obsessive-compulsive, disorder, Anxiety-related, personality, traits, Major, depressive, disorder
Asthma, Pulmonary fibrosis, Cystic fibrosis	Asthma, Pulmonary, fibrosis, Cystic, fibrosis
Fanconi anemia	Fanconi, anemia
Ichthyosis, Psoriasis	Ichthyosis, Psoriasis
Autism	Autism
Other	Miscellaneous

## Sheet: B
B. MEIs in genes with OMIM disease annotations.
Gene symbol	OMIM phenotypes
CHRM3	100100~Prune belly syndrome,
ARHGAP31	100300~Adams-Oliver syndrome 1,
NF2	101000~Neurofibromatosis, type 2,162091~Schwannomatosis,607174~Meningioma, NF2-related, somatic,
FGFR2	101200~Apert syndrome,101400~Saethre-Chotzen syndrome,101600~Craniofacial-skeletal-dermatologic dysplasia,101600~Pfeiffer syndrome,123150~Jackson-Weiss syndrome,123500~Crouzon syndrome,123790~Beare-Stevenson cutis gyrata syndrome,149730~LADD syndrome,207410~Antley-Bixler syndrome without genital anomalies or disordered steroidogenesis,609579~Scaphocephaly, maxillary retrusion, and mental retardat…
TWIST1	101400~Saethre-Chotzen syndrome,101400~Saethre-Chotzen syndrome with eyelid anomalies,123100~Craniosynostosis, type 1,180750~Robinow-Sorauf syndrome,
FGFR1	101600~Pfeiffer syndrome,123150~Jackson-Weiss syndrome,147950~Hypogonadotropic hypogonadism 2 with or without anosmia,166250~Osteoglophonic dysplasia,190440~Trigonocephaly 1,615465~Hartsfield syndrome,
PRKAR1A	101800~Acrodysostosis 1, with or without hormone resistance,160980~Carney complex, type 1,255960~Myxoma, intracardiac,610489~Pigmented nodular adrenocortical disease, primary, 1,Adrenocortical tumor, somatic,~Adrenocortical tumor, somatic,,
ATP2A2	101900~Acrokeratosis verruciformis,124200~Darier disease,
GNAS	102200~Acromegaly, somatic,103580~Pseudohypoparathyroidism Ia,166350~Osseous heteroplasia, progressive,219080~ACTH-independent macronodular adrenal hyperplasia,603233~Pseudohypoparathyroidism Ib,612462~Pseudohypoparathyroidism Ic,612463~Pseudopseudohypoparathyroidism,McCune-Albright syndrome, somatic, mosaic 174800~McCune-Albright syndrome, somatic, mosaic 174800,
FBN1	102370~Acromicric dysplasia,129600~Ectopia lentis, familial,154700~Marfan syndrome,184900~Stiff skin syndrome,604308~MASS syndrome,608328~Weill-Marchesani syndrome 2, dominant,614185~Geleophysic dysplasia 2,Aortic aneurysm, ascending, and dissection~Aortic aneurysm, ascending, and dissection,
NOTCH2	102500~Hajdu-Cheney syndrome,610205~Alagille syndrome 2,
SPATA16	102530~Spermatogenic failure 6,
STAT5B	102578~Leukemia, acute promyelocytic, somatic,245590~Growth hormone insensitivity with immunodeficiency,
ADA	102700~Adenosine deaminase deficiency, partial,102700~Severe combined immunodeficiency due to ADA deficiency,
PKLR	102900~Adenosine triphosphate, elevated, of erythrocytes,266200~Pyruvate kinase deficiency,
ADSL	103050~Adenylosuccinase deficiency,
TP63	103285~ADULT syndrome,106260~Hay-Wells syndrome,129400~Orofacial cleft 8,129400~Rapp-Hodgkin syndrome,603543~Limb-mammary syndrome,604292~Ectrodactyly, ectodermal dysplasia, and cleft lip/palate syndrome 3,605289~Split-hand/foot malformation 4,
TYR	103470~Waardenburg syndrome/albinism, digenic,203100~Albinism, oculocutaneous, type IA,601800~Melanoma, cutaneous malignant, susceptibility to, 8,601800~Skin/hair/eye pigmentation 3, blue/green eyes,601800~Skin/hair/eye pigmentation 3, light/dark/freckling skin,606952~Albinism, oculocutaneous, type IB,
MITF	103470~Waardenburg syndrome/ocular albinism, digenic,103500~Tietz albinism-deafness syndrome,193510~Waardenburg syndrome, type 2A,614456~Melanoma, cutaneous malignant, susceptibility to, 8,
ADH1C	103780~Alcohol dependence, protection against,168600~Parkinson disease, susceptibility to,
ADH1B	103780~Alcohol dependence, protection against,Aerodigestive tract cancer, squamous cell, alcohol-related, protection against~Aerodigestive tract cancer, squamous cell, alcohol-related, protection against,
GABRA2	103780~Alcohol dependence, susceptibility to,
HTR2A	103780~Alcohol dependence, susceptibility to,164230~Obsessive-compulsive disorder, susceptibility to,181500~Schizophrenia, susceptibility to,606788~Anorexia nervosa, susceptibility to,608516~Major depressive disorder, response to citalopram therapy in,608516~Seasonal affective disorder, susceptibility to,
RCBTB1	103780~Alcohol dependence, susceptibility to,Beta-glycopyranoside tasting~Beta-glycopyranoside tasting,
COL4A3	104200~Alport syndrome, autosomal dominant,141200~Hematuria, benign familial,203780~Alport syndrome, autosomal recessive,
ATP1A2	104290~Alternating hemiplegia of childhood,602481~Migraine, familial basilar,602481~Migraine, familial hemiplegic, 2,
APP	104300~Alzheimer disease 1, familial,605714~Cerebral amyloid angiopathy, Dutch, Italian, Iowa, Flemish, Arctic variants,
APBB2	104300~Alzheimer disease, late-onset,
NOS3	104300~Alzheimer disease, late-onset, susceptibility to,145500~Hypertension, susceptibility to,189800~Hypertension, pregnancy-induced,601367~Ischemic stroke, susceptibility to,Coronary artery spasm 1, susceptibility to~Coronary artery spasm 1, susceptibility to,Placental abruption~Placental abruption,
SORL1	104300~Alzheimer disease, pathogenesis, association with,
BLMH	104300~Alzheimer disease, susceptibility to,
A2M	104300~Alzheimer disease, susceptibility to,614036~Alpha-2-macroglobulin deficiency,
ENAM	104500~Amelogenesis imperfecta, type IB,204650~Amelogenesis imperfecta, type IC,
DLX3	104510~Amelogenesis imperfecta, type IV,190320~Trichodontoosseous syndrome,
GSN	105120~Amyloidosis, Finnish type,
FGA	105200~Amyloidosis, familial visceral,202400~Afibrinogenemia, congenital,616004~Dysfibrinogenemia, congenital,616004~Hypodysfibrinogenemia, congenital,
LYZ	105200~Amyloidosis, renal,
TTR	105210~Amyloidosis, hereditary, transthyretin-related,115430~Carpal tunnel syndrome, familial,145680~Dystransthyretinemic hyperthyroxinemia,
NEFH	105400~Amyotrophic lateral sclerosis, susceptibility to,
TRPM7	105500~Amyotrophic lateral sclerosis-parkinsonism/dementia complex, susceptibility to,
C9ORF72	105550~Frontotemporal dementia and/or amyotrophic lateral sclerosis 1,
UBE3A	105830~Angelman syndrome,
SERPING1	106100~Angioedema, hereditary, types I and II,120790~Complement component 4, partial deficiency of,
ITPR2	106190~Anhidrosis, isolated, with normal sweat glands,
ELP4	106210~Aniridia,
PAX6	106210~Aniridia,106210~Cataract with late-onset corneal dystrophy,120200~Coloboma, ocular,120430~Coloboma of optic nerve,120430~Morning glory disc anomaly,136520~Foveal hypoplasia 1,148190~Keratitis,165550~Optic nerve hypoplasia,206700~Gillespie syndrome,604229~Peters anomaly,
HLA-B	106300~Spondyloarthropathy, susceptibility to, 1,608579~Stevens-Johnson syndrome, susceptibility to,608579~Toxic epidermal necrolysis, susceptibility to,Abacavir hypersensitivity, susceptibility to~Abacavir hypersensitivity, susceptibility to,Drug-induced liver injury due to flucloxacillin~Drug-induced liver injury due to flucloxacillin,Synovitis, chronic, susceptibility to~Synovitis, chronic, su…
SALL1	107480~Townes-Brocks branchiootorenal-like syndrome,107480~Townes-Brocks syndrome,
BMS1	107600~Aplasia cutis congenita, nonsyndromic,
IL6	108010~Intracranial hemorrhage in brain cerebrovascular malformations, susceptibility to,125853~Diabetes, susceptibility to, 222100,148000~Kaposi sarcoma, susceptibility to,266600~Crohn disease-associated growth failure,604302~Rheumatoid arthritis, systemic juvenile,
TPM2	108120~Arthrogryposis multiplex congenita, distal, type 1,601680~Arthrogryposis, distal, type 2B,609285~CAP myopathy 2,609285~Nemaline myopathy 4, autosomal dominant,
PIEZO2	108145~Arthrogryposis, distal, type 5,114300~Arthrogryposis, distal, type 3,248700~Marden-Walker syndrome,
CACNA1A	108500~Episodic ataxia, type 2,141500~Migraine, familial hemiplegic, 1,141500~Migraine, familial hemiplegic, 1, with progressive cerebellar ataxia,183086~Spinocerebellar ataxia 6,
VAMP1	108600~Spastic ataxia 1, autosomal dominant,
FLNB	108720~Atelosteogenesis, type I,108721~Atelosteogenesis, type III,112310~Boomerang dysplasia,150250~Larsen syndrome,272460~Spondylocarpotarsal synostosis syndrome,
GJA5	108770~Atrial standstill, digenic (GJA5/SCN5A),614049~Atrial fibrillation, familial, 11,
TEAD1	108985~Sveinsson choreoretinal atrophy,
ATXN3	109150~Machado-Joseph disease,
SUFU	109400~Basal cell nevus syndrome,155255~Medulloblastoma, desmoplastic,607174~Meningioma, familial, susceptibility to,
PTCH1	109400~Basal cell nevus syndrome,605462~Basal cell carcinoma, somatic,610828~Holoprosencephaly-7,
KRAS	109800~Bladder cancer, somatic,114480~Breast cancer, somatic,137215~Gastric cancer, somatic,163200~Schimmelpenning-Feuerstein-Mims syndrome, somatic mosaic,211980~Lung cancer, somatic,260350~Pancreatic carcinoma, somatic,601626~Leukemia, acute myeloid,609942~Noonan syndrome 3,614470~RAS-associated autoimmune leukoproliferative disorder,615278~Cardiofaciocutaneous syndrome 2,
RB1	109800~Bladder cancer, somatic,180200~Retinoblastoma,180200~Retinoblastoma, trilateral,182280~Small cell cancer of the lung, somatic,259500~Osteosarcoma, somatic,
AQP1	110450~Blood group, Colton,Aquaporin-1 deficiency~Aquaporin-1 deficiency,
GCNT2	110800~Adult i phenotype without cataract,110800~Blood group, Ii,116700~Cataract 13 with adult i phenotype,
KEL	110900~Blood group, Kell,
SLC14A1	111000~Blood group, Kidd,
BCAM	111200~Blood group, Auberger system,111200~Blood group, Lutheran system,247420~Blood group, Lutheran null,
BSG	111380~Blood group, OK,
A4GALT	111400~Blood group, P1Pk system, p phenotype,111400~Blood group, P1Pk system, P(2) phenotype,111400~NOR polyagglutination syndrome,
B3GALNT1	111400~Blood group, P1PK system, P(k) phenotype,615021~Blood group, globoside system,
ABCB6	111600~Blood group, Langereis system,609153~Pseudohyperkalemia, familial, 2, due to red cell leak,614497~Microphthalmia, isolated, with coloboma 7,615402~Dyschromatosis universalis hereditaria 3,
ERMAP	111620~Blood group, Radin,111750~Blood group, Scianna system,
RHCE	111690~Blood group, Rhesus,Rh-null disease, amorph type~Rh-null disease, amorph type,
P4HB	112240~Cole-Carpenter syndrome 1,
MTAP	112250~Diaphyseal medullary stenosis with malignant fibrous histiocytoma,
PDE3A	112410~Hypertension and brachydactyly syndrome,
BMP2	112600~Brachydactyly, type A2,235200~HFE hemochromatosis, modifier of,
BMPR1B	112600~Brachydactyly, type A2,609441~Acromesomelic dysplasia, Demirhan type,
ROR2	113000~Brachydactyly, type B1,268310~Robinow syndrome, autosomal recessive,
HOXD13	113200~Brachydactyly, type D,113300~Brachydactyly, type E,186000~Synpolydactyly with foot anomalies,186000~Synpolydactyly, type II,186300~Syndactyly, type V,610713~Brachydactyly-syndactyly syndrome,
TFAP2A	113620~Branchiooculofacial syndrome,
EYA1	113650~Anterior segment anomalies with or without cataract,113650~Branchiootorenal syndrome 1, with or without cataracts,166780~Otofaciocervical syndrome,602588~Branchiootic syndrome 1,
SCN5A	113900~Heart block, nonprogressive,113900~Heart block, progressive, type IA,272120~Sudden infant death syndrome, susceptibility to,601144~Brugada syndrome 1,601154~Cardiomyopathy, dilated, 1E,603829~Ventricular fibrillation, familial, 1,603830~Long QT syndrome-3,608567~Sick sinus syndrome 1,614022~Atrial fibrillation, familial, 10,
NQO2	114480~Breast cancer susceptibility,
PPM1D	114480~Breast cancer,
BRIP1	114480~Breast cancer, early-onset,609054~Fanconi anemia, complementation group J,
RAD54L	114480~Breast cancer, invasive ductal,605027~Lymphoma, non-Hodgkin, somatic,Adenocarcinoma, colonic, somatic~Adenocarcinoma, colonic, somatic,
CDH1	114480~Breast cancer, lobular,137215~Gastric cancer, familial diffuse, with or without cleft lip and/or palate,167000~Ovarian carcinoma, somatic,176807~Prostate cancer, susceptibility to,608089~Endometrial carcinoma, somatic,
BRCA2	114480~Breast cancer, male, susceptibility to,155255~Medulloblastoma,176807~Prostate cancer,194070~Wilms tumor,605724~Fanconi anemia, complementation group D1,612555~Breast-ovarian cancer, familial, 2,613029~Glioblastoma 3,613347~Pancreatic cancer 2,
CASP8	114480~Breast cancer, protection against,114550~Hepatocellular carcinoma, somatic,211980~Lung cancer, protection against,607271~Autoimmune lymphoproliferative syndrome, type IIB,
RB1CC1	114480~Breast cancer, somatic,
TSG101	114480~Breast cancer, somatic,
PIK3CA	114480~Breast cancer, somatic,114500~Colorectal cancer, somatic,114550~Hepatocellular carcinoma, somatic,162900~Nevus, epidermal, somatic,167000~Ovarian cancer, somatic,182000~Keratosis, seborrheic, somatic,211980~Nonsmall cell lung cancer, somatic,602501~Megalencephaly-capillary malformation-polymicrogyria syndrome, somatic,612918~CLOVE syndrome, somatic,613659~Gastric cancer, somatic,615108~Cow…
BARD1	114480~Breast cancer, susceptibility to,
HMMR	114480~Breast cancer, susceptibility to,
CHEK2	114480~Breast cancer, susceptibility to,176807~Prostate cancer, familial, susceptibility to,259500~Osteosarcoma, somatic,609265~Li-Fraumeni syndrome,Breast and colorectal cancer, susceptibility to~Breast and colorectal cancer, susceptibility to,
ATM	114480~Breast cancer, susceptibility to,208900~Ataxia-telangiectasia,Lymphoma, B-cell non-Hodgkin, somatic~Lymphoma, B-cell non-Hodgkin, somatic,Lymphoma, mantle cell~Lymphoma, mantle cell,T-cell prolymphocytic leukemia, somatic~T-cell prolymphocytic leukemia, somatic,
PALB2	114480~Breast cancer, susceptibility to,610832~Fanconi anemia, complementation group N,613348~Pancreatic cancer, susceptibility to, 3,
RAD51	114480~Breast cancer, susceptibility to,614508~Mirror movements 2,
TP53	114480~Breast cancer,114500~Colorectal cancer,114550~Hepatocellular carcinoma,137800~Glioma susceptibility 1,151623~Li-Fraumeni syndrome,202300~Adrenal cortical carcinoma,259500~Osteosarcoma,260350~Pancreatic cancer,260500~Choroid plexus papilloma,607107~Nasopharyngeal carcinoma,614740~Basal cell carcinoma 7,
ESR1	114480~Breast cancer,157300~Migraine, susceptibility to,608446~Myocardial infarction, susceptibility to,615363~Estrogen resistance,Atherosclerosis, susceptibility to~Atherosclerosis, susceptibility to,HDL response to hormone replacement, augmented~HDL response to hormone replacement, augmented,
PTPN12	114500~Colon cancer, somatic,
PTPRJ	114500~Colon cancer, somatic,
RAD54B	114500~Colon cancer, somatic,605027~Lymphoma, non-Hodgkin, somatic,
AURKA	114500~Colon cancer, susceptibility to,
ODC1	114500~Colonic adenoma recurrence, reduced risk of,
DLC1	114500~Colorectal cancer, somatic,
MCC	114500~Colorectal cancer, somatic,
APC	114500~Colorectal cancer, somatic,114550~Hepatoblastoma, somatic,135290~Desmoid disease, hereditary,175100~Adenomatous polyposis coli,175100~Brain tumor-polyposis syndrome 2,175100~Gardner syndrome,613659~Gastric cancer, somatic,Adenoma, periampullary, somatic~Adenoma, periampullary, somatic,
CTNNB1	114500~Colorectal cancer, somatic,114550~Hepatocellular carcinoma, somatic,132600~Pilomatricoma, somatic,167000~Ovarian cancer, somatic,615075~Mental retardation, autosomal dominant 19,
FLCN	114500~Colorectal cancer, somatic,135150~Birt-Hogg-Dube syndrome,144700~Renal carcinoma, chromophobe, somatic,173600~Pneumothorax, primary spontaneous,
DCC	114500~Colorectal cancer, somatic,157600~Mirror movements 1,Esophageal carcinoma, somatic 133239~Esophageal carcinoma, somatic 133239,
BUB1B	114500~Colorectal cancer, somatic,176430~Premature chromatid separation trait,257300~Mosaic variegated aneuploidy syndrome 1,
MLH3	114500~Colorectal cancer, somatic,608089~Endometrial cancer, susceptibility to,614385~Colorectal cancer, hereditary nonpolyposis, type 7,
AXIN2	114500~Colorectal cancer, somatic,608615~Oligodontia-colorectal cancer syndrome,
EP300	114500~Colorectal cancer, somatic,613684~Rubinstein-Taybi syndrome 2,
TLR2	114500~Colorectal cancer, susceptibility to,246300~Leprosy, susceptibility to,607948~Mycobacterium tuberculosis, susceptibility to,
TLR4	114500~Colorectal cancer, susceptibility to,611488~Macular degeneration, age-related, 10,Endotoxin hyporesponsiveness~Endotoxin hyporesponsiveness,
MET	114550~Hepatocellular carcinoma, childhood type, somatic,605074~Renal cell carcinoma, papillary, 1, familial and somatic,616705~Deafness, autosomal recessive 97,
IGF2R	114550~Hepatocellular carcinoma, somatic,
AXIN1	114550~Hepatocellular carcinoma, somatic,607864~Caudal duplication anomaly,
SDHD	114900~Carcinoid tumors, intestinal,168000~Paragangliomas 1, with or without deafness,171300~Pheochromocytoma,252011~Mitochondrial complex II deficiency,606864~Paraganglioma and gastric stromal sarcoma,615106~Cowden syndrome 3,Merkel cell carcinoma, somatic~Merkel cell carcinoma, somatic,
AKAP10	115080~Cardiac conduction defect, susceptibility to,
BRAF	115150~Cardiofaciocutaneous syndrome,211980~Adenocarcinoma of lung, somatic,613706~Noonan syndrome 7,613707~LEOPARD syndrome 3,Colorectal cancer, somatic~Colorectal cancer, somatic,Melanoma, malignant, somatic~Melanoma, malignant, somatic,Nonsmall cell lung cancer, somatic~Nonsmall cell lung cancer, somatic,
TPM1	115196~Cardiomyopathy, hypertrophic, 3,611878~Cardiomyopathy, dilated, 1Y,611878~Left ventricular noncompaction 9,
LMNA	115200~Cardiomyopathy, dilated, 1A,151660~Lipodystrophy, familial partial, 2,159001~Muscular dystrophy, limb-girdle, type 1B,176670~Hutchinson-Gilford progeria,181350~Emery-Dreifuss muscular dystrophy 2, AD,212112~Malouf syndrome,248370~Mandibuloacral dysplasia,275210~Restrictive dermopathy, lethal,605588~Charcot-Marie-Tooth disease, type 2B1,610140~Heart-hand syndrome, Slovenian type,613205~Musc…
BCO1	115300~Hypercarotenemia and vitamin A deficiency, autosomal dominant,
SDHB	115310~Paragangliomas 4,171300~Pheochromocytoma,606764~Gastrointestinal stromal tumor,606864~Paraganglioma and gastric stromal sarcoma,612359~Cowden syndrome 2,
WFS1	116400~Cataract 41,125853~Diabetes mellitus, noninsulin-dependent, association with,222300~Wolfram syndrome,600965~Deafness, autosomal dominant 6/14/38,614296~Wolfram-like syndrome, autosomal dominant,
EPHA2	116600~Cataract 6, multiple types,
KRIT1	116860~Cavernous malformations of CNS and retina,116860~Cerebral cavernous malformations-1,116860~Hyperkeratotic cutaneous capillary-venous malformations associated with cerebral capillary malformations,
ITGB2	116920~Leukocyte adhesion deficiency,
RYR1	117000~Central core disease,117000~Neuromuscular disease, congenital, with uniform type 1 fiber,145600~King-Denborough syndrome,145600~Malignant hyperthermia susceptibility 1,255320~Minicore myopathy with external ophthalmoplegia,
BEAN1	117210~Spinocerebellar ataxia 31,
ITPR1	117360~Spinocerebellar ataxia 29, congenital nonprogressive,606658~Spinocerebellar ataxia 15,
NSD1	117550~Sotos syndrome 1,130650~Beckwith-Wiedemann syndrome,601626~Leukemia, acute myeloid,
SNRPB	117650~Cerebrocostomandibular syndrome,
ABCC11	117800~Axillary odor, variation in,117800~Colostrum secretion, variation in,117800~Earwax, wet/dry,
MPZ	118200~Charcot-Marie-Tooth disease, type 1B,145900~Dejerine-Sottas disease,180800~Roussy-Levy syndrome,605253~Neuropathy, congenital hypomyelinating,607677~Charcot-Marie-Tooth disease, type 2I,607736~Charcot-Marie-Tooth disease, type 2J,607791~Charcot-Marie-Tooth disease, dominant intermediate D,
KIF1B	118210~Charcot-Marie-Tooth disease, type 2A1,171300~Pheochromocytoma,256700~Neuroblastoma, susceptibility to, 1,
PMP22	118220~Charcot-Marie-Tooth disease, type 1A,118300~Charcot-Marie-Tooth disease, type 1E,139393~Neuropathy, inflammatory demyelinating,145900~Dejerine-Sottas disease,162500~Neuropathy, recurrent, with pressure palsies,180800~Roussy-Levy syndrome,
JAG1	118450~Alagille syndrome,187500~Tetralogy of Fallot,Deafness, congenital heart defects, and posterior embryotoxon~Deafness, congenital heart defects, and posterior embryotoxon,
ANKH	118600~Chondrocalcinosis 2,123000~Craniometaphyseal dysplasia,
PNKD	118800~Paroxysmal nonkinesigenic dyskinesia,
IRF6	119300~van der Woude syndrome,119500~Popliteal pterygium syndrome 1,608864~Orofacial cleft 6,
RUNX2	119600~Cleidocranial dysplasia,119600~Cleidocranial dysplasia, forme fruste, dental anomalies only,119600~Cleidocranial dysplasia, forme fruste, with brachydactyly,156510~Metaphyseal dysplasia with maxillary hypoplasia with or without brachydactyly,
HPGD	119900~Digital clubbing, isolated congenital,259100~Cranioosteoarthropathy,259100~Hypertrophic osteoarthropathy, primary, autosomal recessive 1,
ABCB1	120080~Colchicine resistance,612244~Inflammatory bowel disease 13,
NLRP3	120100~Familial cold-induced inflammatory syndrome 1,191900~Muckle-Wells syndrome,607115~CINCA syndrome,
PAX2	120330~Papillorenal syndrome,616002~Glomerulosclerosis, focal segmental, 7,
YAP1	120433~Coloboma, ocular,120433~Coloboma, ocular, with or without hearing impairment, cleft lip/palate, and/or mental retardation,
MSH2	120435~Colorectal cancer, hereditary nonpolyposis, type 1,158320~Muir-Torre syndrome,276300~Mismatch repair cancer syndrome,
CRX	120970~Cone-rod retinal dystrophy-2,613829~Leber congenital amaurosis 7,
FBN2	121050~Contractural arachnodactyly, congenital,616118~Macular degeneration, early-onset,
KCNQ2	121200~Myokymia,121200~Seizures, benign neonatal, 1,613720~Epileptic encephalopathy, early infantile, 7,
KCNQ3	121201~Seizures, benign neonatal, type 2,
UBIAD1	121800~Corneal dystrophy, Schnyder type,
PIKFYVE	121850~Corneal fleck dystrophy,
COL17A1	122400~Epithelial recurrent erosion dystrophy,226650~Epidermolysis bullosa, junctional, localisata variant,226650~Epidermolysis bullosa, junctional, non-Herlitz type,
NIPBL	122470~Cornelia de Lange syndrome 1,
VKORC1	122700~Warfarin resistance,607473~Vitamin K-dependent clotting factors, combined deficiency of, 2,
F9	122700~Warfarin sensitivity,300807~Deep venous thrombosis, protection against,300807~Thrombophilia, X-linked, due to factor IX defect,306900~Hemophilia B,
CYP2C9	122700~Warfarin sensitivity,Tolbutamide poor metabolizer~Tolbutamide poor metabolizer,
PAX3	122880~Craniofacial-deafness-hand syndrome,148820~Waardenburg syndrome, type 3,193500~Waardenburg syndrome, type 1,268220~Rhabdomyosarcoma 2, alveolar,
CAV3	123320~Creatine phosphokinase, elevated serum,192600~Cardiomyopathy, familial hypertrophic,606072~Rippling muscle disease,607801~Muscular dystrophy, limb-girdle, type IC,611818~Long QT syndrome 9,614321~Myopathy, distal, Tateyama type,
HLA-DQB1	123400~Creutzfeldt-Jakob disease, variant, resistance to,126200~Multiple sclerosis, susceptibility to, 1,212750~Celiac disease, susceptibility to,
DIAPH1	124900~Deafness, autosomal dominant 1,616632~Seizures, cortical blindness, microcephaly syndrome,
OPA1	125250~Optic atrophy plus syndrome,165500~Optic atrophy 1,606657~Glaucoma, normal tension, susceptibility to,
ATN1	125370~Dentatorubro-pallidoluysian atrophy,
SMOC2	125400~Dentin dysplasia, type I, with microdontia and misshapen teeth,
DSPP	125420~Dentin dysplasia, type II,125490~Dentinogenesis imperfecta, Shields type II,125500~Dentinogenesis imperfecta, Shields type III,605594~Deafness, autosomal dominant 39, with dentinogenesis,
AVP	125700~Diabetes insipidus, neurohypophyseal,
HNF4A	125850~MODY, type I,125853~Diabetes mellitus, noninsulin-dependent,616026~Fanconi renotubular syndrome 4, with maturity-onset diabetes of the young,
GCK	125851~MODY, type II,125853~Diabetes mellitus, noninsulin-dependent, late onset,602485~Hyperinsulinemic hypoglycemia, familial, 3,606176~Diabetes mellitus, permanent neonatal,
IRS2	125853~Diabetes mellitus, noninsulin-dependent,
MAPK8IP1	125853~Diabetes mellitus, noninsulin-dependent,
CDKAL1	125853~Diabetes mellitus, noninsulin-dependent, susceptibility to,
IGF2BP2	125853~Diabetes mellitus, noninsulin-dependent, susceptibility to,
SLC30A8	125853~Diabetes mellitus, noninsulin-dependent, susceptibility to,
ENPP1	125853~Diabetes mellitus, non-insulin-dependent, susceptibility to,208000~Arterial calcification, generalized, of infancy, 1,601665~Obesity, susceptibility to,613312~Hypophosphatemic rickets, autosomal recessive, 2,615522~Cole disease,
HNF1B	125853~Diabetes mellitus, noninsulin-dependent,137920~Renal cysts and diabetes syndrome,144700~Renal cell carcinoma,
SLC2A2	125853~Diabetes mellitus, noninsulin-dependent,227810~Fanconi-Bickel syndrome,
ABCC8	125853~Diabetes mellitus, noninsulin-dependent,240800~Hypoglycemia of infancy, leucine-sensitive,256450~Hyperinsulinemic hypoglycemia, familial, 1,606176~Diabetes mellitus, permanent neonatal,610374~Diabetes mellitus, transient neonatal 2,
LIPC	125853~Diabetes mellitus, noninsulin-dependent,612797~High density lipoprotein cholesterol level QTL 12,614025~Hepatic lipase deficiency,
IRS1	125853~Diabetes mellitus, noninsulin-dependent,Coronary artery disease, susceptibility to~Coronary artery disease, susceptibility to,
MTNR1B	125853~Diabetes mellitus, type 2, susceptibility to,
TCF7L2	125853~Diabetes mellitus, type 2, susceptibility to,
GPD2	125853~Diabetes, type 2, susceptibility to,
PPARG	125853~Diabetes, type 2,601665~Obesity, severe,604367~Insulin resistance, severe, digenic,604367~Lipodystrophy, familial partial, type 3,609338~Carotid intimal medial thickness 1,Obesity, resistance to~Obesity, resistance to,
PTPN1	125853~Insulin resistance, susceptibility to,
HLA-DRB1	126200~Multiple sclerosis, susceptibility to, 1,180300~Rheumatoid arthritis, susceptibility to,181000~Sarcoidosis, susceptibility to, 1,Pemphigoid, susceptibility to~Pemphigoid, susceptibility to,
EFEMP1	126600~Doyne honeycomb degeneration of retina,
CFH	126700~Basal laminar drusen,235400~Hemolytic uremic syndrome, atypical, susceptibility to, 1,609814~Complement factor H deficiency,610698~Macular degeneration, age-related, 4,
SHOX	127300~Leri-Weill dyschondrosteosis,249700~Langer mesomelic dysplasia,300582~Short stature, idiopathic familial,
ADAR	127400~Dyschromatosis symmetrica hereditaria,615010~Aicardi-Goutieres syndrome 6,
SNCA	127750~Dementia, Lewy body,168601~Parkinson disease 1,605543~Parkinson disease 4,
PRRT2	128200~Episodic kinesigenic dyskinesia 1,602066~Convulsions, familial infantile, with paroxysmal choreoathetosis,605751~Seizures, benign familial infantile, 2,
GCH1	128230~Dystonia, DOPA-responsive, with or without hyperphenylalaninemia,233910~Hyperphenylalaninemia, BH4-deficient, B,
EDAR	129490~Ectodermal dysplasia 10A, hypohidrotic/hair/nail type, autosomal dominant,224900~Ectodermal dysplasia 10B, hypohidrotic/hair/tooth type, autosomal recessive,612630~Hair morphology 1, hair thickness,
GJB6	129500~Ectodermal dysplasia 2, Clouston type,220290~Deafness, digenic GJB2/GJB6,612643~Deafness, autosomal dominant 3B,612645~Deafness, autosomal recessive 1B,
COL5A1	130000~Ehlers-Danlos syndrome, classic type,
COL5A2	130000~Ehlers-Danlos syndrome, classic type,
COL3A1	130050~Ehlers-Danlos syndrome, type IV,
COL1A2	130060~Ehlers-Danlos syndrome, type VIIB,166210~Osteogenesis imperfecta, type II,166220~Osteogenesis imperfecta, type IV,166710~Osteoporosis, postmenopausal,225320~Ehlers-Danlos syndrome, cardiac valvular form,259420~Osteogenesis imperfecta, type III,
SPTA1	130600~Elliptocytosis-2,266140~Pyropoikilocytosis,270970~Spherocytosis, type 3,
KCNQ1OT1	130650~Beckwith-Wiedemann syndrome,
MEN1	131100~Multiple endocrine neoplasia 1,Adrenal adenoma, somatic~Adrenal adenoma, somatic,Angiofibroma, somatic~Angiofibroma, somatic,Carcinoid tumor of lung~Carcinoid tumor of lung,Lipoma, somatic~Lipoma, somatic,Parathyroid adenoma, somatic~Parathyroid adenoma, somatic,
ITGB4	131800~Epidermolysis bullosa of hands and feet,226650~Epidermolysis bullosa, junctional, non-Herlitz type,226730~Epidermolysis bullosa, junctional, with pyloric atresia,
COMP	132400~Epiphyseal dysplasia, multiple, 1,177170~Pseudoachondroplasia,
MUTYH	132600~Colorectal adenomatous polyposis, autosomal recessive, with pilomatricomas,608456~Adenomas, multiple colorectal,613659~Gastric cancer, somatic,
CYLD	132700~Cylindromatosis, familial,601606~Trichoepithelioma, multiple familial, 1,605041~Brooke-Spiegler syndrome,
TGFBR1	132800~Multiple self-healing squamous epithelioma, susceptibility to,609192~Loeys-Dietz syndrome 1,
MYH11	132900~Aortic aneurysm, familial thoracic 4,
SCN9A	133020~Erythermalgia, primary,133020~Small fiber neuropathy,243000~HSAN2D, autosomal recessive,243000~Insensitivity to pain, congenital,607208~Dravet syndrome, modifier of,613863~Epilepsy, generalized, with febrile seizures plus, type 7,613863~Febrile seizures, familial, 3B,Paroxysmal extreme pain disorder, 167400,~Paroxysmal extreme pain disorder, 167400,,
SH2B3	133100~Erythrocytosis, somatic,187950~Thrombocythemia, somatic,254450~Myelofibrosis, somatic,
JAK2	133100~Erythrocytosis, somatic,254450~Myelofibrosis, somatic,263300~Polycythemia vera, somatic,600800~Budd-Chiari syndrome, somatic,601626~Leukemia, acute myeloid, somatic,614521~Thrombocythemia 3,
ELOVL4	133190~Spinocerebellar ataxia 34,600110~Stargardt disease 3,614457~Ichthyosis, spastic quadriplegia, and mental retardation,
TGFBR2	133239~Esophageal cancer, somatic,610168~Loeys-Dietz syndrome 2,614331~Colorectal cancer, hereditary nonpolyposis, type 6,
DLEC1	133239~Esophageal cancer,211980~Lung cancer,
RNF6	133239~Esophageal carcinoma, somatic,
WWOX	133239~Esophageal squamous cell carcinoma, somatic,614322~Spinocrebellar ataxia, autosomal recessive 12,616211~Epileptic encephalopathy, early infantile, 28,
ERCC6	133540~Cockayne syndrome, type B,211980~Lung cancer, susceptibility to,214150~Cerebrooculofacioskeletal syndrome 1,278800~De Sanctis-Cacchione syndrome,600630~UV-sensitive syndrome 1,613761~Macular degeneration, age-related, susceptibility to 5,
EXT1	133700~Exostoses, multiple, type 1,215300~Chondrosarcoma,
EXT2	133701~Exostoses, multiple, type 2,616682~Seizures, scoliosis, and macrocephaly syndrome,
G6PD	134700~Favism,300908~Hemolytic anemia due to G6PD deficiency,611162~Resistance to malaria due to G6PD deficiency,
ACVR1	135100~Fibrodysplasia ossificans progressiva,
SOS1	135300~Fibromatosis, gingival, 1,610733~Noonan syndrome 4,
KCNH1	135500~Zimmermann-Laband syndrome 1,611816~Temple-Baraitser syndrome,
KIF21A	135700~Fibrosis of extraocular muscles, congenital, 1,135700~Fibrosis of extraocular muscles, congenital, 3B,
LMBR1	135750~Laurin-Sandrow syndrome,174500~Polydactyly, preaxial type II,174500~Triphalangeal thumb, type I,174500~Triphalangeal thumb-polysyndactyly syndrome,186200~Syndactyly, type IV,188740~Hypoplastic or aplastic tibia with polydactyly,200500~Acheiropody,
SMARCAD1	136000~Adermatoglyphia,
SRCAP	136140~Floating-Harbor syndrome,
DIP2B	136630~Mental retardation, FRA12A type,
WT1	136680~Frasier syndrome,156240~Mesothelioma, somatic,194070~Wilms tumor, type 1,194080~Denys-Drash syndrome,256370~Nephrotic syndrome, type 4,608978~Meacham syndrome,
COL8A2	136800~Corneal dystrophy, Fuchs endothelial, 1,609140~Corneal dystrophy, posterior polymorphous 2,
PRPH2	136880~Retinitis punctata albescens,169150~Macular dystrophy, patterned, 1,608133~Leber congenital amaurosis 18,608133~Retinitis pigmentosa 7 and digenic,608161~Macular dystrophy, vitelliform, 3,613105~Choriodal dystrophy, central areolar 2,
RHO	136880~Retinitis punctata albescens,610445~Night blindness, congenital stationary, autosomal dominant 1,613731~Retinitis pigmentosa 4, autosomal dominant or recessive,
TIMP3	136900~Sorsby fundus dystrophy,
HINT1	137200~Neuromyotonia and axonal neuropathy, autosomal recessive,
BCL10	137245~Lymphoma, MALT, somatic,156240~Mesothelioma, somatic,605027~Lymphoma, follicular, somatic,616098~Immunodeficiency 37,Male germ cell tumor, somatic, 273300,~Male germ cell tumor, somatic, 273300,,Sezary syndrome, somatic,~Sezary syndrome, somatic,,
HDC	137580~Gilles de la Tourette syndrome, susceptibility to,
PITX2	137600~Iridogoniodysgenesis, type 2,180500~Axenfeld-Rieger syndrome, type 1,180550~Ring dermoid of cornea,604229~Peters anomaly,
OPTN	137760~Glaucoma 1, open angle, E,606657~Glaucoma, normal tension, susceptibility to,613435~Amyotrophic lateral sclerosis 12,
ERBB2	137800~Glioblastoma, somatic,211980~Adenocarcinoma of lung, somatic,613659~Gastric cancer, somatic,Ovarian cancer, somatic,~Ovarian cancer, somatic,,
IDH1	137800~Glioma, susceptibility to, somatic,
GLMN	138000~Glomuvenous malformations,
SLC36A2	138500~Hyperglycinuria,242600~Iminoglycinuria, digenic,
DICER1	138800~Goiter, multinodular 1, with or without Sertoli-Leydig cell tumors,180295~Rhabdomyosarcoma, embryonal, 2,601200~Pleuropulmonary blastoma,
ABCG2	138900~Uric acid concentration, serum, QTL1,614490~Junior blood group system,
SMAD4	139210~Myhre syndrome,174900~Polyposis, juvenile intestinal,175050~Juvenile polyposis/hereditary hemorrhagic telangiectasia syndrome,260350~Pancreatic cancer, somatic,
CYP19A1	139300~Aromatase excess syndrome,613546~Aromatase deficiency,
HOXA13	140000~Hand-foot-uterus syndrome,176305~Guttmacher syndrome,
HPD	140350~Hawkinsinuria,276710~Tyrosinemia, type III,
MATN3	140600~Osteoarthritis susceptibility 2,607078~Epiphyseal dysplasia, multiple, 5,608728~Spondyloepimetaphyseal dysplasia,
HBG2	141749~Fetal hemoglobin quantitative trait locus 1,613977~Cyanosis, transient neonatal,
RET	142623~Hirschsprung disease, susceptibility to, 1,155240~Medullary thyroid carcinoma,162300~Multiple endocrine neoplasia IIB,171300~Pheochromocytoma,171400~Multiple endocrine neoplasia IIA,191830~Renal agenesis,209880~Central hypoventilation syndrome, congenital,
UFSP2	142669~Hip dysplasia, Beukes type,
NCSTN	142690~Acne inversa, familial, 1,
TBX5	142900~Holt-Oram syndrome,
TGIF1	142946~Holoprosencephaly-4,
CHST3	143095~Spondyloepiphyseal dysplasia with congenital joint dislocations,
HTT	143100~Huntington disease,
VCAN	143200~Wagner syndrome 1,
TBX18	143400~Congenital anomalies of kidney and urinary tract 2,
CETP	143470~High density lipoprotein cholesterol level QTL 10,143470~Hyperalphalipoproteinemia,
UGT1A1	143500~Gilbert syndrome,218800~Crigler-Najjar syndrome, type I,237900~Hyperbilirubinemia, familial transient neonatal,601816~Bilirubin, serum level of, QTL1,606785~Crigler-Najjar syndrome, type II,
CA12	143860~Hyperchlorhidrosis, isolated,
ADCY10	143870~Hypercalciuria, absorptive, susceptibility to,
CYP24A1	143880~Hypercalcemia, infantile,
ABCA1	143890~Coronary artery disease in familial hypercholesterolemia, protection against,205400~Tangier disease,604091~HDL deficiency, type 2,
EPHX2	143890~Hypercholesterolemia, familial, due to LDLR defect, modifier of,
GHR	143890~Hypercholesterolemia, familial, modifier of,262500~Laron dwarfism,604271~Growth hormone insensitivity, partial,Increased responsiveness to growth hormone~Increased responsiveness to growth hormone,
LDLR	143890~Hypercholesterolemia, familial,143890~LDL cholesterol level QTL2,
APOB	144010~Hypercholesterolemia, due to ligand-defective apo B,615558~Hypobetalipoproteinemia,
LPL	144250~Combined hyperlipidemia, familial,238600~Lipoprotein lipase deficiency,High density lipoprotein cholesterol level QTL 11~High density lipoprotein cholesterol level QTL 11,
OGG1	144700~Renal cell carcinoma, clear cell, somatic,
VHL	144700~Renal cell carcinoma, somatic,171300~Pheochromocytoma,193300~von Hippel-Lindau syndrome,263400~Erythrocytosis, familial, 2,Hemangioblastoma, cerebellar, somatic~Hemangioblastoma, cerebellar, somatic,
LRP5	144750~Hyperostosis, endosteal,144750~Osteosclerosis,166710~Osteoporosis,259770~Osteoporosis-pseudoglioma syndrome,601813~Exudative vitreoretinopathy 4,601884~Bone mineral density variability 1,607634~Osteopetrosis, autosomal dominant 1,607636~van Buchem disease, type 2,
CDC73	145000~Hyperparathyroidism, familial primary,145001~Hyperparathyroidism-jaw tumor syndrome,145001~Parathyroid adenoma with cystic changes,608266~Parathyroid carcinoma,
KITLG	145250~Hyperpigmentation with or without hypopigmentation,611664~Skin/hair/eye pigmentation 7, blond/brown hair,616697~Deafness, congenital, unilateral or asymmetric,
SPECC1L	145410~Opitz GBBB syndrome, type II,600251~Facial clefting, oblique, 1,
RGS5	145500~Blood pressure regulation QTL,
SELE	145500~Blood pressure regulation QTL,
PTGIS	145500~Hypertension, essential,
ADD1	145500~Hypertension, essential, salt-sensitive,
AGT	145500~Hypertension, essential, susceptibility to,267430~Renal tubular dysgenesis,Preeclampsia, susceptibility to~Preeclampsia, susceptibility to,
ECE1	145500~Hypertension, essential, susceptibility to,613870~Hirschsprung disease, cardiac defects, and autonomic dysfunction,
AGTR1	145500~Hypertension, essential,267430~Renal tubular dysgenesis,
CYP3A5	145500~Hypertension, salt-sensitive essential, susceptibility to,
NOS2	145500~Hypertension, susceptibility to,611162~Malaria, resistance to,
THRB	145650~Thyroid hormone resistance, selective pituitary,188570~Thyroid hormone resistance,274300~Thyroid hormone resistance, autosomal recessive,
LIPI	145750~Hypertriglyceridemia, susceptibility to,
EGR2	145900~Dejerine-Sottas disease,605253~Neuropathy, congenital hypomyelinating, 1,607678~Charcot-Marie-Tooth disease, type 1D,
PRX	145900~Dejerine-Sottas disease,614895~Charcot-Marie-Tooth disease, type 4F,
CASR	145980~Hypocalciuric hypercalcemia, type I,239200~Hyperparathyroidism, neonatal,601198~Hypocalcemia, autosomal dominant,601198~Hypocalcemia, autosomal dominant, with Bartter syndrome,612899~Epilepsy idiopathic generalized, susceptibility to, 8,Calcium, serum level of~Calcium, serum level of,Hypercalciuric hypercalcemia~Hypercalciuric hypercalcemia,
GNA11	145981~Hypocalciuric hypercalcemia, type II,615361~Hypocalcemia, autosomal dominant 2,
GNRHR	146110~Hypogonadotropic hypogonadism 7 without anosmia,
GATA3	146255~Hypoparathyroidism, sensorineural deafness, and renal dysplasia,
ALPL	146300~Hypophosphatasia, adult,146300~Odontohypophosphatasia,241500~Hypophosphatasia, infantile,241510~Hypophosphatasia, childhood,
COQ2	146500~Multiple system atrophy, susceptibility to,607426~Coenzyme Q10 deficiency, primary, 1,
GLI3	146510~Pallister-Hall syndrome,174200~Polydactyly, postaxial, types A1 and B,174700~Polydactyly, preaxial, type IV,175700~Greig cephalopolysyndactyly syndrome,241800~Hypothalamic hamartomas, somatic,
FLG	146700~Ichthyosis vulgaris,605803~Dermatitis, atopic, susceptibility to, 2,
HAVCR1	147050~Atopy, resistance to,
SELP	147050~Atopy, susceptibility to,
PLA2G7	147050~Atopy, susceptibility to,600807~Asthma, susceptibility to,614278~Platelet-activating factor acetylhydrolase deficiency,
IL4R	147050~Atopy, susceptibility to,609423~AIDS, slow progression to,
SPINK5	147050~Atopy,256500~Netherton syndrome,
PHF11	147050~IgE levels QTL,600807~Asthma,
IL21R	147050~IgE, elevated level of,615207~Immunodeficiency, primary, autosomal recessive, IL21R-related,
STAT3	147060~Hyper-IgE recurrent infection syndrome,615952~Autoimmune disease, multisystem, infantile-onset,
ATP8B1	147480~Cholestasis, intrahepatic, of pregnancy, 1,211600~Cholestasis, progressive familial intrahepatic 1,243300~Cholestasis, benign recurrent intrahepatic,
KMT2D	147920~Kabuki syndrome 1,
ANKRD11	148050~KBG syndrome,
AAGAB	148600~Keratoderma, palmoplantar, punctate type IA,
DSG1	148700~Keratosis palmoplantaris striata I, AD,615508~Erythroderma, congenital, with palmoplantar keratoderma, hypotrichosis, and hyper IgE,
GLRA1	149400~Hyperekplexia, hereditary 1, autosomal dominant or recessive,
IGSF3	149700~Lacrimal duct defect,
FGF10	149730~LADD syndrome,180920~Aplasia of lacrimal and salivary glands,
HMGA2	150699~Leiomyoma, uterine, somatic,
PTDSS1	151050~Lenz-Majewski hyperostotic dwarfism,
PTPN11	151100~LEOPARD syndrome 1,156250~Metachondromatosis,163950~Noonan syndrome 1,607785~Leukemia, juvenile myelomonocytic, somatic,
PTPN22	152700~Systemic lupus erythematosus susceptibility to,180300~Rheumatoid arthritis, susceptibility to,222100~Diabetes, type 1, susceptibility to,
DNASE1	152700~Systemic lupus erythematosus, susceptibility to,
KIF11	152950~Microcephaly with or without chorioretinopathy, lymphedema, or mental retardation,
PTEN	153480~Bannayan-Riley-Ruvalcaba syndrome,155600~Malignant melanoma, somatic,158350~Cowden syndrome 1,158350~Lhermitte-Duclos syndrome,176807~Prostate cancer, somatic,275355~Squamous cell carcinoma, head and neck, somatic,276950~VATER association with macrocephaly and ventriculomegaly,605309~Macrocephaly/autism syndrome,607174~Meningioma,608089~Endometrial carcinoma, somatic,613028~Glioma suscepti…
MYH9	153640~Fechtner syndrome,153650~Epstein syndrome,155100~May-Hegglin anomaly,600208~Macrothrombocytopenia and progressive sensorineural deafness,603622~Deafness, autosomal dominant 17,605249~Sebastian syndrome,
ABCA4	153800~Macular degeneration, age-related, 2,248200~Fundus flavimaculatus,248200~Retinal dystrophy, early-onset severe,248200~Stargardt disease 1,601718~Retinitis pigmentosa 19,604116~Cone-rod dystrophy 3,
FXYD2	154020~Hypomagnesemia 2, renal,
SF3B4	154400~Acrofacial dysostosis 1, Nager type,
TCOF1	154500~Treacher Collins syndrome 1,
COL11A1	154780~Marshall syndrome,228520~Fibrochondrogenesis 1,603932~Lumbar disc herniation, susceptibility to,604841~Stickler syndrome, type II,
KIT	154800~Mast cell disease,172800~Piebaldism,273300~Germ cell tumors,601626~Leukemia, acute myeloid,606764~Gastrointestinal stromal tumor, familial,
NTRK1	155240~Medullary thyroid carcinoma, familial,256800~Insensitivity to pain, congenital, with anhidrosis,
ACTG2	155310~Visceral myopathy,
CDKN2A	155601~Melanoma, cutaneous malignant, 2,155755~Melanoma and neural system tumor syndrome,606719~Pancreatic cancer/melanoma syndrome,Orolaryngeal cancer, multiple,~Orolaryngeal cancer, multiple,,
LEMD3	155950~Melorheostosis with osteopoikilosis,166700~Buschke-Ollendorff syndrome,166700~Osteopoikilosis,
MBD5	156200~Mental retardation, autosomal dominant 1,
COL10A1	156500~Metaphyseal chondrodysplasia, Schmid type,
EDNRA	157300~Migraine, resistance to,616367~Mandibulofacial dysostosis with alopecia,
POLG	157640~Progressive external ophthalmoplegia, autosomal dominant 1,203700~Mitochondrial DNA depletion syndrome 4A (Alpers type),258450~Progressive external ophthalmoplegia, autosomal recessive 1,607459~Mitochondrial recessive ataxia syndrome (includes SANDO and SCAE),613662~Mitochondrial DNA depletion syndrome 4B (MNGIE type),
KRT86	158000~Monilethrix,
MYH8	158300~Trismus-pseudocamptodactyly syndrome,608837~Carney complex variant,
MLH1	158320~Muir-Torre syndrome,276300~Mismatch repair cancer syndrome,609310~Colorectal cancer, hereditary nonpolyposis, type 2,
SLC5A7	158580~Neuronopathy, distal hereditary motor, type VIIA,
HSPB8	158590~Neuropathy, distal hereditary motor, type IIA,608673~Charcot-Marie-Tooth disease, axonal, type 2L,
DYNC1H1	158600~Spinal muscular atrophy, lower extremity-predominant 1, AD,614228~Charcot-Marie-Tooth disease, axonal, type 20,614563~Mental retardation, autosomal dominant 13,
COL6A2	158810~Bethlem myopathy 1,254090~Ullrich congenital muscular dystrophy 1,255600~Myosclerosis, congenital,
COL6A3	158810~Bethlem myopathy 1,254090~Ullrich congenital muscular dystrophy 1,616411~Dystonia 27,
SMCHD1	158901~Fascioscapulohumeral muscular dystrophy 2, digenic,
MYOT	159000~Muscular dystrophy, limb-girdle, type 1A,182920~Myopathy, spheroid body,609200~Myopathy, myofibrillar, 3,
SGCE	159900~Dystonia-11, myoclonic,
ASAH1	159950~Spinal muscular atrophy with progressive myoclonic epilepsy,228000~Farber lipogranulomatosis,
MTMR14	160150~Centronuclear myopathy, autosomal, modifier of,
DNM2	160150~Myopathy, centronuclear,606482~Charcot-Marie-Tooth disease, axonal, type 2M,606482~Charcot-Marie-Tooth disease, dominant intermediate B,615368~Lethal congenital contracture syndrome 5,
CLCN1	160800~Myotonia congenita, dominant,255700~Myotonia congenita, recessive,Myotonia levior, recessive~Myotonia levior, recessive,
DMPK	160900~Myotonic dystrophy 1,
LMX1B	161200~Nail-patella syndrome,
UMOD	162000~Hyperuricemic nephropathy, familial juvenile 1,603860~Medullary cystic kidney disease 2,609886~Glomerulocystic kidney disease with hyperuricemia and isosthenuria,
SMARCB1	162091~Schwannomatosis-1, susceptibility to,609322~Rhabdoid predisposition syndrome 1,609322~Rhabdoid tumors, somatic,614608~Mental retardation, autosomal dominant 15,
NF1	162200~Neurofibromatosis, type 1,162210~Neurofibromatosis, familial spinal,193520~Watson syndrome,601321~Neurofibromatosis-Noonan syndrome,607785~Leukemia, juvenile myelomonocytic,
SPTLC1	162400~Neuropathy, hereditary sensory and autonomic, type IA,
GNAQ	163000~Capillary malformations, congenital, 1, somatic, mosaic,185300~Sturge-Weber syndrome, somatic, mosaic,
PDE6B	163500~Night blindness, congenital stationary, autosomal dominant 2,613801~Retinitis pigmentosa-40,
BDNF	164230~Obsessive-compulsive disorder, protection against,209880~Central hypoventilation syndrome, congenital,607499~Bulimia nervosa, age of onset of weight loss in,610269~Anorexia nervosa, susceptibility to,Memory impairment, susceptibility to~Memory impairment, susceptibility to,
SLC6A4	164230~Obsessive-compulsive disorder,607834~Anxiety-related personality traits,
ATXN1	164400~Spinocerebellar ataxia 1,
ATXN7	164500~Spinocerebellar ataxia 7,
OPA3	165300~Optic atrophy 3 with cataract,258501~3-methylglutaconic aciduria, type III,
FRZB	165720~Osteoarthritis susceptibility 1,
ACAN	165800~Osteochondritis dissecans, short stature, and early-onset osteoarthritis,608361~Spondyloepiphyseal dysplasia, Kimberley type,612813~Spondyloepimetaphyseal dysplasia, aggrecan type,
ANO5	166260~Gnathodiaphyseal dysplasia,611307~Muscular dystrophy, limb-girdle, type 2L,613319~Miyoshi muscular dystrophy 3,
CLCN7	166600~Osteopetrosis, autosomal dominant 2,611490~Osteopetrosis, autosomal recessive 4,
VDR	166710~Osteoporosis, involutional,277440~Rickets, vitamin D-resistant, type IIA,
CALCR	166710~Osteoporosis, postmenopausal, susceptibility,
OPCML	167000~Ovarian cancer, somatic,
SQSTM1	167250~Paget disease of bone 3,616437~Frontotemporal dementia and/or amyotrophic lateral sclerosis 3,
VCP	167320~Inclusion body myopathy with early-onset Paget disease and frontotemporal dementia 1,613954~Amyotrophic lateral sclerosis 14, with or without frontotemporal dementia,616687~Charcot-Marie-Tooth disease, type 2Y,
CFTR	167800~Pancreatitis, idiopathic,211400~Bronchiectasis with or without elevated sweat chloride 1, modifier of,219700~Cystic fibrosis,277180~Congenital bilateral absence of vas deferens,Hypertrypsinemia, neonatal~Hypertrypsinemia, neonatal,Sweat chloride elevation without CF~Sweat chloride elevation without CF,
COMT	167870~Panic disorder, susceptibility to,181500~Schizophrenia, susceptibility to,
ATXN2	168600~Parkinson disease, late-onset, susceptibility to,183090~Amyotrophic lateral sclerosis, susceptibility to, 13,183090~Spinocerebellar ataxia 2,
MAPT	168600~Parkinson disease, susceptibility to,172700~Pick disease,260540~Supranuclear palsy, progressive atypical,600274~Dementia, frontotemporal, with or without parkinsonism,601104~Supranuclear palsy, progressive,
TFAP2B	169100~Char syndrome,
LBR	169400~Pelger-Huet anomaly,215140~Greenberg skeletal dysplasia,613471~Reynolds syndrome,
LMNB1	169500~Leukodystrophy, adult-onset, autosomal dominant,
ATP2C1	169600~Hailey-Hailey disease,
PEPD	170100~Prolidase deficiency,
KCNJ2	170390~Andersen syndrome,609622~Short QT syndrome 3,613980~Atrial fibrillation, familial, 9,
CACNA1S	170400~Hypokalemic periodic paralysis, type 1,188580~Thyrotoxic periodic paralysis, susceptibility to, 1,601887~Malignant hyperthermia susceptibility 5,
MAX	171300~Pheochromocytoma, susceptibility to,
PSEN1	172700~Pick disease,600274~Dementia, frontotemporal,607822~Alzheimer disease, type 3,607822~Alzheimer disease, type 3, with spastic paraparesis and apraxia,607822~Alzheimer disease, type 3, with spastic paraparesis and unusual plaques,613694~Cardiomyopathy, dilated, 1U,613737~Acne inversa, familial, 3,
CRB1	172870~Pigmented paravenous chorioretinal atrophy,600105~Retinitis pigmentosa-12, autosomal recessive,613835~Leber congenital amaurosis 8,
FERMT1	173650~Kindler syndrome,
SEC63	174050~Polycystic liver disease,
DDX59	174300~Orofaciodigital syndrome V,
TNFRSF11A	174810~Osteolysis, familial expansile,602080~Paget disease of bone 2, early-onset,612301~Osteopetrosis, autosomal recessive 7,
BMPR1A	174900~Juvenile polyposis syndrome, infantile form,174900~Polyposis, juvenile intestinal,610069~Polyposis syndrome, hereditary mixed, 2,
STK11	175200~Peutz-Jeghers syndrome,260350~Pancreatic cancer,273300~Testicular tumor, somatic,Melanoma, malignant, somatic~Melanoma, malignant, somatic,
COL4A1	175780~Porencephaly 1,180000~Retinal arteries, tortuosity of,607595~Brain small vessel disease with or without ocular anomalies,611773~Angiopathy, hereditary, with nephropathy, aneurysms, and muscle cramps,614519~Hemorrhage, intracerebral, susceptibility to,
PMVK	175800~Porokeratosis 1, multiple types,
HMBS	176000~Porphyria, acute intermittent,176000~Porphyria, acute intermittent, nonerythroid variant,
SNRPN	176270~Prader-Willi syndrome,
LHCGR	176410~Leydig cell adenoma, somatic, with precocious puberty,176410~Precocious puberty, male,238320~Leydig cell hypoplasia with hypergonadotropic hypogonadism,238320~Leydig cell hypoplasia with pseudohermaphroditism,238320~Luteinizing hormone resistance, female,
MSR1	176807~Prostate cancer, hereditary,614266~Barrett esophagus/esophageal adenocarcinoma,
HIP1	176807~Prostate cancer, progression of,
MAD1L1	176807~Prostate cancer, somatic,Lymphoma, somatic~Lymphoma, somatic,
CD82	176807~Prostate cancer, susceptibility to,
ZFHX3	176807~Prostate cancer, susceptibility to, somatic,
AR	176807~Prostate cancer, susceptibility to,300068~Androgen insensitivity,300633~Hypospadias 1, X-linked,312300~Androgen insensitivity, partial, with or without breast cancer,313200~Spinal and bulbar muscular atrophy of Kennedy,
MXI1	176807~Prostate cancer, susceptibility to,Neurofibrosarcoma~Neurofibrosarcoma,
FECH	177000~Protoporphyria, erythropoietic, autosomal recessive,
SCNN1B	177200~Liddle syndrome,211400~Bronchiectasis with or without elevated sweat chloride 1,264350~Pseudohypoaldosteronism, type I,
SCNN1G	177200~Liddle syndrome,264350~Pseudohypoaldosteronism, type I,613071~Bronchiectasis with or without elevated sweat chloride 3,
LOXL1	177650~Exfoliation syndrome, susceptibility to,
NR3C2	177735~Pseudohypoaldosteronism type I, autosomal dominant,605115~Hypertension, early-onset, autosomal dominant, with exacerbation in pregnancy,
ABCC6	177850~Pseudoxanthoma elasticum, forme fruste,264800~Pseudoxanthoma elasticum,614473~Arterial calcification, generalized, of infancy, 2,
MYH3	178110~Arthrogryposis, distal, type 8,193700~Arthrogryposis, distal, type 2A,601680~Arthrogryposis, distal, type 2B,
ZFHX4	178300~Ptosis, congenital,
SFTPA2	178500~Pulmonary fibrosis, idiopathic,
BMPR2	178600~Pulmonary hypertension, familial primary, 1, with or without HHT,178600~Pulmonary hypertension, primary, fenfluramine or dexfenfluramine-associated,265450~Pulmonary venoocclusive disease 1,
RP1	180100~Retinitis pigmentosa 1,
RP9	180104~Retinitis pigmentosa 9,
IMPDH1	180105~Retinitis pigmentosa 10,613837~Leber congenital amaurosis 11,
IL10	180300~Rheumatoid arthritis, progression of,609423~HIV-1, susceptibility to,614395~Graft-versus-host disease, protection against,
CD244	180300~Rheumatoid arthritis, susceptibility to,
PADI4	180300~Rheumatoid arthritis, susceptibility to,
SLC22A4	180300~Rheumatoid arthritis, susceptibility to,
CIITA	180300~Rheumatoid arthritis, susceptibility to,209920~Bare lymphocyte syndrome, type II, complementation group A,
CREBBP	180849~Rubinstein-Taybi syndrome,
PLAG1	181030~Adenomas, salivary gland pleomorphic, somatic,
KCTD1	181270~Scalp-ear-nipple syndrome,
DISC1	181500~Schizoaffective disorder, susceptibility to,604906~Schizophrenia, susceptibility to,
DAO	181500~Schizophrenia,
DAOA	181500~Schizophrenia,
RTN4R	181500~Schizophrenia, susceptibility to,
SYN2	181500~Schizophrenia, susceptibility to,
DRD3	181500~Schizophrenia, susceptibility to,190300~Essential tremor, susceptibility to,
DTNBP1	181500~Schizophrenia,614076~Hermansky-Pudlak syndrome 7,
SKI	182212~Shprintzen-Goldberg syndrome,
HESX1	182230~Growth hormone deficiency with pituitary anomalies,182230~Pituitary hormone deficiency, combined, 5,182230~Septooptic dysplasia,
IFIH1	182250~Singleton-Merten syndrome 1,615846~Aicardi-Goutieres syndrome 7,
RAI1	182290~Smith-Magenis syndrome,
ATL1	182600~Spastic paraplegia 3A, autosomal dominant,613708~Neuropathy, hereditary sensory, type ID,
SPAST	182601~Spastic paraplegia 4, autosomal dominant,
ANK1	182900~Spherocytosis, type 1,
FUZ	182940~Neural tube defects,
VANGL2	182940~Neural tube defects,
VANGL1	182940~Neural tube defects, susceptibility to,600145~Caudal regression syndrome,
VAPB	182980~Spinal muscular atrophy, late-onset, Finkel type,608627~Amyotrophic lateral sclerosis 8,
RHAG	185000~Overhydrated hereditary stomatocytosis,268150~Anemia, hemolytic, Rh-null, regulator type,Rh-mod syndrome~Rh-mod syndrome,
STIM1	185070~Stormorken syndrome,612783~Immunodeficiency 10,Myopathy, tubular aggregate, 1 160565~Myopathy, tubular aggregate, 1 160565,
NOD2	186580~Blau syndrome,266600~Inflammatory bowel disease 1,607507~Psoriatic arthritis, susceptibility to,609464~Sarcoidosis, early-onset,
ENG	187300~Telangiectasia, hereditary hemorrhagic, type 1,
TBX1	187500~Tetralogy of Fallot,188400~DiGeorge syndrome,192430~Velocardiofacial syndrome,217095~Conotruncal anomaly face syndrome,
GDF1	187500~Tetralogy of Fallot,208530~Right atrial isomerism,217095~Double-outlet right ventricle,613854~Transposition of great arteries, dextro-looped 3,
GATA6	187500~Tetralogy of Fallot,217095~Persistent truncus arteriosus,600001~Pancreatic agenesis and congenital heart defects,614474~Atrioventricular septal defect 5,614475~Atrial septal defect 9,
GATA4	187500~Tetralogy of Fallot,607941~Atrial septal defect 2,614429~Ventricular septal defect 1,614430~Atrioventricular septal defect 4,615542~Testicular anomalies with or without congenital heart disease,
ZFPM2	187500~Tetralogy of Fallot,610187~Diaphragmatic hernia 3,616067~46XY sex reversal 9,
ITGB3	187800~Bleeding disorder, platelet-type, 16, autosomal dominant,273800~Glanzmann thrombasthenia,608446~Myocardial infarction, susceptibility to,Purpura, posttransfusion~Purpura, posttransfusion,Thrombocytopenia, neonatal alloimmune~Thrombocytopenia, neonatal alloimmune,
GFI1B	187900~Bleeding disorder, platelet-type, 17,
ANKRD26	188000~Thrombocytopenia 2,
MASTL	188000~Thrombocytopenia-2,
F13A1	188050~Venous thrombosis, protection against,608446~Myocardial infarction, protection against,613225~Factor XIIIA deficiency,
F5	188055~Thrombophilia due to activated protein C resistance,188055~Thrombophilia, susceptibility to, due to factor V Leiden,227400~Factor V deficiency,600880~Budd-Chiari syndrome,601367~Stroke, ischemic, susceptibility to,614389~Pregnancy loss, recurrent, susceptibility to, 1,
SRGAP1	188470~Thyroid cancer, nonmedullary, 2,
MINPP1	188470~Thyroid carcinoma, follicular,
GABBR2	188890~Nicotine dependence, protection against,188890~Nicotine dependence, susceptibility to,
SLC6A3	188890~Nicotine dependence, protection against,613135~Parkinsonism-dystonia, infantile,
EPHX1	189800~Preeclampsia, susceptibility to,607748~Hypercholanemia, familial,Diphenylhydantoin toxicity~Diphenylhydantoin toxicity,Fetal hydantoin syndrome~Fetal hydantoin syndrome,
FGF5	190330~Trichomegaly,
TRPS1	190350~Trichorhinophalangeal syndrome, type I,190351~Trichorhinophalangeal syndrome, type III,
TSC1	191100~Tuberous sclerosis-1,606690~Lymphangioleiomyomatosis,607341~Focal cortical dysplasia, Taylor balloon cell type,
ITGA8	191830~Renal hypodysplasia/aplasia 1,
KCNQ1	192500~Long QT syndrome 1,192500~Long QT syndrome 1, acquired, susceptibility to,220400~Jervell and Lange-Nielsen syndrome,607554~Atrial fibrillation, familial, 3,609621~Short QT syndrome 2,
CAPN5	193235~Vitreoretinopathy, neovascular inflammatory,
VWF	193400~von Willebrand disease, type 1,277480~von Willibrand disease, type 3,613554~von Willebrand disease, types 2A, 2B, 2M, and 2N,
EVC	193530~Weyers acrodental dysostosis,225500~Ellis-van Creveld syndrome,
EVC2	193530~Weyers acrofacial dysostosis,225500~Ellis-van Creveld syndrome,
GPC3	194070~Wilms tumor, somatic,312870~Simpson-Golabi-Behmel syndrome, type 1,
PRKAG2	194200~Wolff-Parkinson-White syndrome,261740~Glycogen storage disease of heart, lethal congenital,600858~Cardiomyopathy, hypertrophic 6,
PIEZO1	194380~Dehydrated hereditary stomatocytosis with or without pseudohyperkalemia and/or perinatal edema,
MTTP	200100~Abetalipoproteinemia,605552~Metabolic syndrome, protection against,
TWIST2	200110~Ablepharon-macrostomia syndrome,209885~Barber-Say syndrome,227260~Focal facial dermal dysplasia 3, Setleis type,
VPS13A	200150~Choreoacanthocytosis,
TRIP11	200600~Achondrogenesis, type IA,
KIF7	200990~Acrocallosal syndrome,200990~Joubert syndrome 12,614120~Hydrolethalus syndrome 2,
RAB23	201000~Carpenter syndrome,
WNK1	201300~Neuropathy, hereditary sensory and autonomic, type II,614492~Pseudohypoaldosteronism, type IIC,
TBX19	201400~Adrenocorticotropic hormone deficiency,
ACADM	201450~Acyl-CoA dehydrogenase, medium chain, deficiency of,
ACADVL	201475~VLCAD deficiency,
POR	201750~Antley-Bixler syndrome with genital anomalies and disordered steroidogenesis,613571~Disordered steroidogenesis due to cytochrome P450 oxidoreductase,
MC2R	202200~Glucocorticoid deficiency, due to ACTH unresponsiveness,
PEX5	202370~Peroxisome biogenesis disorder 2B,214110~Peroxisome biogenesis disorder 2A (Zellweger),616716~Rhizomelic chondrodysplasia punctata, type 5,
PRRX1	202650~Agnathia-otocephaly complex,
OCA2	203200~Albinism, brown oculocutaneous,203200~Albinism, oculocutaneous, type II,227220~Skin/hair/eye pigmentation 1, blond/brown hair,227220~Skin/hair/eye pigmentation 1, blue/nonblue eyes,
TYRP1	203290~Albinism, oculocutaneous, type III,612271~Skin/hair/eye pigmentation, variation in, 11 (Melanesian blond hair),
HPS1	203300~Hermansky-Pudlak syndrome 1,
HGD	203500~Alkaptonuria,
OGDH	203740~Alpha-ketoglutarate dehydrogenase deficiency,
ACAT1	203750~Alpha-methylacetoacetic aciduria,
COL4A4	203780~Alport syndrome, autosomal recessive,Hematuria, familial benign~Hematuria, familial benign,
ALMS1	203800~Alstrom syndrome,
GUCY2D	204000~Leber congenital amaurosis 1,601777~Cone-rod dystrophy 6,
RPE65	204100~Leber congenital amaurosis 2,613794~Retinitis pigmentosa 20,
CLN3	204200~Ceroid lipofuscinosis, neuronal, 3,
CLN6	204300~Ceroid lipofuscinosis, neuronal, Kufs type, adult onset,601780~Ceroid lipofuscinosis, neuronal, 6,
DHTKD1	204750~2-aminoadipic 2-oxoadipic aciduria,615025~Charcot-Marie-Tooth disease, axonal, type 2Q,
ALS2	205100~Amyotrophic lateral sclerosis 2, juvenile,606353~Primary lateral sclerosis, juvenile,607225~Spastic paralysis, infantile onset ascending,
GLRX5	205950~Anemia, sideroblastic, pyridoxine-refractory, autosomal recessive,
SLC25A38	205950~Anemia, sideroblastic, pyridoxine-refractory, autosomal recessive,
SLC11A2	206100~Anemia, hypochromic microcytic,
TMPRSS6	206200~Iron-refractory iron deficiency anemia,
SOX2	206900~Microphthalmia, syndromic 3,206900~Optic nerve hypoplasia and abnormalities of the central nervous system,
SMOC1	206920~Microphthalmia with limb anomalies,
ARG1	207800~Argininemia,
SLC2A10	208050~Arterial tortuosity syndrome,
DOK7	208150~Fetal akinesia deformation sequence,254300~Myasthenic syndrome, congenital, 10,
MUSK	208150~Fetal akinesia deformation sequence,616325~Myasthenic syndrome, congenital, 9, associated with acetylcholine receptor deficiency,
PRG4	208250~Camptodactyly-arthropathy-coxa vara-pericarditis syndrome,
NPHP3	208540~Renal-hepatic-pancreatic dysplasia 1,267010~Meckel syndrome 7,604387~Nephronophthisis 3,
APTX	208920~Ataxia, early-onset, with oculomotor apraxia and hypoalbuminemia,
TF	209300~Atransferrinemia,
EDN3	209880~Central hypoventilation syndrome, congenital,613265~Waardenburg syndrome, type 4B,613712~Hirschsprung disease, susceptibility to, 4,
BBS1	209900~Bardet-Biedl syndrome 1,
ARL6	209900~Bardet-Biedl syndrome 1, modifier of,600151~Bardet-Biedl syndrome 3,613575~Retinitis pigmentosa 55,
IFNGR1	209950~Immunodeficiency 27A, mycobacteriosis, AR,600263~H. pylori infection, susceptibility to,607948~Tuberculosis infection, protection against,607948~Tuberculosis, susceptibility to,610424~Hepatitis B virus infection, susceptibility to,615978~Immunodeficiency 27B, mycobacteriosis, AD,
MCCC1	210200~3-Methylcrotonyl-CoA carboxylase 1 deficiency,
MCCC2	210210~3-Methylcrotonyl-CoA carboxylase 2 deficiency,
ABCG5	210250~Sitosterolemia,
ABCG8	210250~Sitosterolemia,611465~Gallbladder disease 4,
ATR	210600~Seckel syndrome 1,614564~Cutaneous telangiectasia and cancer syndrome, familial,
PCNT	210720~Microcephalic osteodysplastic primordial dwarfism, type II,
SLC24A4	210750~Skin/hair/eye pigmentation 6, blond/brown hair,210750~Skin/hair/eye pigmentation 6, blue/green eyes,615887~Amelogenesis imperfecta, type IIA5,
BLM	210900~Bloom syndrome,
EMG1	211180~Bowen-Conradi syndrome,
CD96	211750~C syndrome,
NT5E	211800~Calcification of joints and arteries,
GALNT3	211900~Tumoral calcinosis, hyperphosphatemic, familial,
EGFR	211980~Adenocarcinoma of lung, response to tyrosine kinase inhibitor in,211980~Nonsmall cell lung cancer, response to tyrosine kinase inhibitor in,211980~Nonsmall cell lung cancer, susceptibility to,616069~Inflammatory skin and bowel disease, neonatal, 2,
PPP2R1B	211980~Lung cancer,
MAP3K8	211980~Lung cancer, somatic,
IRF1	211980~Nonsmall cell lung cancer, somatic,613659~Gastric cancer, somatic,Myelodysplastic syndrome, preleukemic~Myelodysplastic syndrome, preleukemic,Myelogenous leukemia, acute~Myelogenous leukemia, acute,
PMM2	212065~Congenital disorder of glycosylation, type Ia,
CPN1	212070~Carboxypeptidase N deficiency,
SLC22A5	212140~Carnitine deficiency, systemic primary,
AGK	212350~Sengers syndrome,614691~Cataract 38, autosomal recessive,
RAB3GAP2	212720~Martsolf syndrome,614225~Warburg micro syndrome 2,
HLA-DQA1	212750~Celiac disease, susceptibility to,
LRP4	212780~Cenani-Lenz syndactyly syndrome,614305~Sclerosteosis 2,616304~Myasthenic syndrome, congenital, 17,
RNF216	212840~Cerebellar ataxia and hypogonadotropic hypogonadism,
SLC20A2	213600~Basal ganglia calcification, idiopathic, 1,
CYP27A1	213700~Cerebrotendinous xanthomatosis,
TMCO1	213980~Craniofacial dysmorphism, skeletal anomalies, and mental retardation syndrome,
PEX1	214100~Peroxisome biogenesis disorder 1A (Zellweger),234580~Heimler syndrome 1,601539~Peroxisome biogenesis disorder 1B (NALD/IRD),
MEOX1	214300~Klippel-Feil syndrome 2,
GDAP1	214400~Charcot-Marie-Tooth disease, type 4A,607706~Charcot-Marie-Tooth disease, axonal, with vocal cord paresis,607831~Charcot-Marie-Tooth disease, axonal, type 2K,608340~Charcot-Marie-Tooth disease, recessive intermediate, A,
MYO5A	214450~Griscelli syndrome, type 1,
LYST	214500~Chediak-Higashi syndrome,
SLC26A3	214700~Diarrhea 1, secretory chloride, congenital,
SEMA3E	214800~CHARGE syndrome,
CHD7	214800~CHARGE syndrome,612370~Hypogonadotropic hypogonadism 5 with or without anosmia,
AMACR	214950~Bile acid synthesis defect, congenital, 4,614307~Alpha-methylacyl-CoA racemase deficiency,
PEX7	215100~Chondrodysplasia punctata, rhizomelic, type 1,614879~Peroxisome biogenesis disorder 9B,
PNPLA6	215470~Boucher-Neuhauser syndrome,245800~Laurence-Moon syndrome,275400~Oliver-McFarlane syndrome,612020~Spastic paraplegia 39, autosomal recessive,
KRT8	215600~Cirrhosis, cryptogenic,215600~Cirrhosis, noncryptogenic, susceptibility to,
FIG4	216340~Yunis-Varon syndrome,611228~Charcot-Marie-Tooth disease, type 4J,612577~Amyotrophic lateral sclerosis 11,612691~Polymicrogyria, bilateral temporooccipital,
TMEM67	216360~COACH syndrome,607361~Meckel syndrome 3,610688~Joubert syndrome 6,613550~Nephronophthisis 11,615991~Bardet-Biedl syndrome 14, modifier of,
RPGRIP1L	216360~COACH syndrome,611560~Joubert syndrome 7,611561~Meckel syndrome 5,
CC2D2A	216360~COACH syndrome,612284~Meckel syndrome 6,612285~Joubert syndrome 9,
ERCC8	216400~Cockayne syndrome, type A,614621~UV-sensitive syndrome 2,
VPS13B	216550~Cohen syndrome,
SALL2	216820~Coloboma, ocular, autosomal recessive,
CNGA3	216900~Achromatopsia-2,
C2	217000~C2 deficiency,615489~Macular degeneration, age-related, 14, reduced risk of,
WDPCP	217085~Congenital heart defects, hamartomas of tongue, and polysyndactyly,615992~Bardet-Biedl syndrome 15,
PLG	217090~Dysplasminogenemia,217090~Plasminogen deficiency, type I,
KERA	217300~Cornea plana congenita, recessive,
SLC12A6	218000~Agenesis of the corpus callosum with peripheral neuropathy,
IFT122	218330~Cranioectodermal dysplasia 1,
RECQL4	218600~Baller-Gerold syndrome,266280~RAPADILINO syndrome,268400~Rothmund-Thomson syndrome,
PAX8	218700~Hypothyroidism, congenital, due to thyroid dysgenesis or hypoplasia,
FRAS1	219000~Fraser syndrome,
FREM2	219000~Fraser syndrome,
GRIP1	219000~Fraser syndrome,
FBLN5	219100~Cutis laxa, autosomal recessive, type IA,608895~Macular degeneration, age-related, 3,608895~Neuropathy, hereditary, with or without age-related macular degeneration,614434~Cutis laxa, autosomal dominant 2,
ALDH18A1	219150~Cutis laxa, autosomal recessive, type IIIA,601162~Spastic paraplegia 9A, autosomal dominant,616586~Spastic paraplegia 9B, autosomal recessive,616603~Cutis laxa, autosomal dominant 3,
ATP6V0A2	219200~Cutis laxa, autosomal recessive, type IIA,278250~Wrinkly skin syndrome,
CTH	219500~Cystathioninuria,Homocysteine, total plasma, elevated~Homocysteine, total plasma, elevated,
CTNS	219750~Cystinosis, ocular nonnephropathic,219800~Cystinosis, atypical nephropathic,219800~Cystinosis, nephropathic,219900~Cystinosis, late-onset juvenile or adolescent nephropathic,
SLC3A1	220100~Cystinuria,
SLC7A9	220100~Cystinuria,
FASTKD2	220110~Mitochondrial complex IV deficiency,
SCO1	220110~Mitochondrial complex IV deficiency,
COX10	220110~Mitochondrial complex IV deficiency,256000~Leigh syndrome due to mitochondrial COX4 deficiency,
LRPPRC	220111~Leigh syndrome, French-Canadian type,
TBC1D24	220500~DOOR syndrome,605021~Myoclonic epilepsy, infantile, familial,614617~Deafness , autosomal recessive 86,615338~Epileptic encephalopathy, early infantile, 16,616044~Deafness, autosomal dominant 65,
CSF1R	221820~Leukoencephalopathy, diffuse hereditary, with spheroids,
OAS1	222100~Diabetes mellitus, type 1, susceptibility to,Viral infection, susceptibility to~Viral infection, susceptibility to,
ITPR3	222100~Diabetes, type 1, susceptibility to,
LRP2	222448~Donnai-Barrow syndrome,
TTC37	222470~Trichohepatoenteric syndrome 1,
SLC26A2	222600~Diastrophic dysplasia,222600~Diastrophic dysplasia, broad bone-platyspondylic variant,226900~Epiphyseal dysplasia, multiple, 4,256050~Atelosteogenesis II,256050~De la Chapelle dysplasia,600972~Achondrogenesis Ib,
SLC7A7	222700~Lysinuric protein intolerance,
SLC1A1	222730~Dicarboxylic aminoaciduria,615232~Schizophrenia susceptibility 18,
DPYS	222748~Dihydropyrimidinuria,
GNPAT	222765~Chondrodysplasia punctata, rhizomelic, type 2,
BPGM	222800~Erythrocytosis due to bisphosphoglycerate mutase deficiency,
SI	222900~Sucrase-isomaltase deficiency, congenital,
LCT	223000~Lactase deficiency, congenital,
MCM6	223100~Lactase persistence/nonpersistence,
DBH	223360~Dopamine beta-hydroxylase deficiency,Dopamine-beta-hydroxylase activity levels, plasma~Dopamine-beta-hydroxylase activity levels, plasma,
DYM	223800~Dyggve-Melchior-Clausen disease,607326~Smith-McCort dysplasia,
VLDLR	224050~Cerebellar hypoplasia and mental retardation with or without quadrupedal locomotion 1,
SEC23B	224100~Dyserythropoietic anemia, congenital, type II,
CDAN1	224120~Dyserythropoietic anemia, congenital, type Ia,
HSPG2	224410~Dyssegmental dysplasia, Silverman-Handmaker type,255800~Schwartz-Jampel syndrome, type 1,
ORC1	224690~Meier-Gorlin syndrome 1,
NECTIN1	225060~Cleft lip/palate-ectodermal dysplasia syndrome,225060~Orofacial cleft 7,
CDH3	225280~Ectodermal dysplasia, ectrodactyly, and macular dystrophy,601553~Hypotrichosis, congenital, with juvenile macular dystrophy,
ADAMTS2	225410~Ehlers-Danlos syndrome, type VIIC,
TSEN54	225753~Pontocerebellar hypoplasia type 4,277470~Pontocerebellar hypoplasia type 2A,610204~Pontocerebellar hypoplasia type 5,
FLVCR2	225790~Proliferative vasculopathy and hydraencephaly-hydrocephaly syndrome,
TMPRSS15	226200~Enterokinase deficiency,
TMC6	226400~Epidermodysplasia verruciformis,
TMC8	226400~Epidermodysplasia verruciformis,
LAMA3	226650~Epidermolysis bullosa, generalized atrophic benign,226700~Epidermolysis bullosa, junctional, Herlitz type,245660~Laryngoonychocutaneous syndrome,
LAMC2	226650~Epidermolysis bullosa, junctional, non-Herlitz type,226700~Epidermolysis bullosa, junctional, Herlitz type,
ITGA6	226730~Epidermolysis bullosa, junctional, with pyloric stenosis,
ROGDI	226750~Kohlschutter-Tonz syndrome,
EIF2AK3	226980~Wolcott-Rallison syndrome,
HERC2	227220~Skin/hair/eye pigmentation 1, blond/brown hair,227220~Skin/hair/eye pigmentation 1, blue/nonblue eyes,615516~Mental retardation, autosomal recessive 38,
SLC45A2	227240~Skin/hair/eye pigmentation 5, black/nonblack hair,227240~Skin/hair/eye pigmentation 5, dark/fair skin,227240~Skin/hair/eye pigmentation 5, dark/light eyes,606574~Albinism, oculocutaneous, type IV,
LMAN1	227300~Combined factor V and VIII deficiency,
FANCC	227645~Fanconi anemia, complementation group C,
FANCD2	227646~Fanconi anemia, complementation group D2,
FANCA	227650~Fanconi anemia, complementation group A,
ANTXR2	228600~Hyaline fibromatosis syndrome,
WNT7A	228930~Fuhrmann syndrome,276820~Ulna and fibula, absence of, with severe limb deficiency,
KNG1	228960~High molecular weight kininogen deficiency,228960~Kininogen deficiency,
PLA2G5	228980~Fleck retina, familial benign,
SLC46A1	229050~Folate malabsorption, hereditary,
FXN	229300~Friedreich ataxia,229300~Friedreich ataxia with retained reflexes,
ALDOB	229600~Fructose intolerance,
FBP1	229700~Fructose-1,6-bisphosphatase deficiency,
FUCA1	230000~Fucosidosis,
GALE	230350~Galactose epimerase deficiency,
GALT	230400~Galactosemia,
GCLC	230450~Hemolytic anemia due to gamma-glutamylcysteine synthetase deficiency,608446~Myocardial infarction, susceptibility to,
GLB1	230500~GM1-gangliosidosis, type I,230600~GM1-gangliosidosis, type II,230650~GM1-gangliosidosis, type III,253010~Mucopolysaccharidosis type IVB (Morquio),
ANTXR1	230740~GAPO syndrome,602089~Hemangioma, capillary infantile, susceptibility to,
GORAB	231070~Geroderma osteodysplasticum,
NLRP7	231090~Hydatidiform mole, recurrent, 1,
TBXAS1	231095~Ghosal hematodiaphyseal syndrome,614158~Thromboxane synthase deficiency,
CYP1B1	231300~Glaucoma 3A, primary open angle, congenital, juvenile, or adult onset,604229~Peters anomaly,
AAAS	231550~Achalasia-addisonianism-alacrimia syndrome,
GCDH	231670~Glutaricaciduria, type I,
ETFA	231680~Glutaric acidemia IIA,
ETFB	231680~Glutaric acidemia IIB,
ETFDH	231680~Glutaric acidemia IIC,
SUGCT	231690~Glutaric aciduria III,
GSS	231900~Hemolytic anemia due to glutathione synthetase deficiency,266130~Glutathione synthetase deficiency,
AGL	232400~Glycogen storage disease IIIa,232400~Glycogen storage disease IIIb,
GBE1	232500~Glycogen storage disease IV,263570~Polyglucosan body disease, adult form,
PYGL	232700~Glycogen storage disease VI,
FSHR	233300~Ovarian dysgenesis 1,276400~Ovarian response to FSH stimulation,608115~Ovarian hyperstimulation syndrome,
HSD17B4	233400~Perrault syndrome 1,261515~D-bifunctional protein deficiency,
RAG2	233650~Combined cellular and humoral immune defects with granulomas,601457~Severe combined immunodeficiency, B cell-negative,603554~Omenn syndrome,
RAG1	233650~Combined cellular and humoral immune defects with granulomas,601457~Severe combined immunodeficiency, B cell-negative,603554~Omenn syndrome,609889~Alpha/beta T-cell lymphopenia with gamma/delta T-cell expansion, severe cytomegalovirus infection, and autoimmunity,
NCF2	233710~Chronic granulomatous disease due to deficiency of NCF-2,
PANK2	234200~Neurodegeneration with brain iron accumulation 1,607236~HARP syndrome,
EIF2AK4	234810~Pulmonary venoocclusive disease 2,
CFHR1	235400~Hemolytic uremic syndrome, atypical, susceptibility to,603075~Macular degeneration, age-related, reduced risk of,
CFHR3	235400~Hemolytic uremic syndrome, atypical, susceptibility to,603075~Macular degeneration, age-related, reduced risk of,
CCBE1	235510~Hennekam lymphangiectasia-lymphedema syndrome 1,
SP110	235550~Hepatic venoocclusive disease with immunodeficiency,607948~Mycobacterium tuberculosis, susceptibility to,
AKR1D1	235555~Bile acid synthesis defect, congenital, 2,
HK1	235700~Hemolytic anemia due to hexokinase deficiency,605285~Neuropathy, hereditary motor and sensory, Russe type,
ZEB2	235730~Mowat-Wilson syndrome,
HAL	235800~Histidinemia,
CBS	236200~Homocystinuria, B6-responsive and nonresponsive types,236200~Thrombosis, hyperhomocysteinemic,
MTRR	236270~Homocystinuria-megaloblastic anemia, cbl E type,601634~Neural tube defects, folate-sensitive, susceptibility to,
CCDC88C	236600~Hydrocephalus, nonsyndromic, autosomal recessive,616053~Spinocerebellar ataxia 40,
POMT1	236670~Muscular dystrophy-dystroglycanopathy (congenital with brain and eye anomalies), type A, 1,609308~Muscular dystrophy-dystroglycanopathy (limb-girdle), type C, 1,613155~Muscular dystrophy-dystroglycanopathy (congenital with mental retardation), type B, 1,
HYLS1	236680~Hydrolethalus syndrome,
MKKS	236700~McKusick-Kaufman syndrome,605231~Bardet-Biedl syndrome 6,
HPSE2	236730~Urofacial syndrome 1,
L2HGDH	236792~L-2-hydroxyglutaric aciduria,
KYNU	236800~Hydroxykynureninuria,
CPS1	237300~Carbamoylphosphate synthetase I deficiency,615371~Pulmonary hypertension, neonatal, susceptibility to,Venoocclusive disease after bone marrow transplantation~Venoocclusive disease after bone marrow transplantation,
NAGS	237310~N-acetylglutamate synthase deficiency,
SLCO1B1	237450~Hyperbilirubinemia, Rotor type, digenic,
SLCO1B3	237450~Hyperbilirubinemia, Rotor type, digenic,
ABCC2	237500~Dubin-Johnson syndrome,
AASS	238700~Hyperlysinemia,268700~Saccharopinuria,
ALDH4A1	239510~Hyperprolinemia, type II,
ABCC9	239850~Hypertrichotic osteochondrodysplasia,608569~Cardiomyopathy, dilated, 1O,614050~Atrial fibrillation, familial, 12,
GYS2	240600~Glycogen storage disease 0, liver,
DCAF17	241080~Woodhouse-Sakati syndrome,
TBCE	241410~Hypoparathyroidism-retardation-dysmorphism syndrome,244460~Kenny-Caffey syndrome, type 1,
ABCA12	242500~Ichthyosis, autosomal recessive 4B (harlequin),601277~Ichthyosis, congenital, autosomal recessive 4A,
EPG5	242840~Vici syndrome,
DNMT3B	242860~Immunodeficiency-centromeric instability-facial anomalies syndrome 1,
SMARCAL1	242900~Schimke immunoosseous dysplasia,
TTC7A	243150~Gastrointestinal defects and immunodeficiency syndrome,
ACTB	243310~Baraitser-Winter syndrome 1,607371~Dystonia, juvenile-onset,
IVD	243500~Isovaleric acidemia,
DOCK8	243700~Hyper-IgE recurrent infection syndrome, autosomal recessive,
UBR1	243800~Johanson-Blizzard syndrome,
DNAI1	244400~Ciliary dyskinesia, primary, 1, with or without situs inversus,
UBE3B	244450~Kaufman oculocerebrofacial syndrome,
OXCT1	245050~Succinyl CoA:3-oxoacid CoA transferase deficiency,
MGP	245150~Keutel syndrome,
GALC	245200~Krabbe disease,
SLC16A1	245340~Erythrocyte lactate transporter defect,610021~Hyperinsulinemic hypoglycemia, familial, 7,616095~Monocarboxylate transporter 1 deficiency,
DLAT	245348~Pyruvate dehydrogenase E2 deficiency,
PDHX	245349~Lacticacidemia due to PDX1 deficiency,
SUCLG1	245400~Mitochondrial DNA depletion syndrome 9 (encephalomyopathic type with methylmalonic aciduria),
GRIN2A	245570~Epilepsy, focal, with speech disorder and with or without mental retardation,
INSR	246200~Leprechaunism,262190~Rabson-Mendenhall syndrome,609968~Hyperinsulinemic hypoglycemia, familial, 5,610549~Diabetes mellitus, insulin-resistant, with acanthosis nigricans,
HMGCL	246450~HMG-CoA lyase deficiency,
LMF1	246650~Lipase deficiency, combined,
SAR1B	246700~Chylomicron retention disease,
DLD	246900~Dihydrolipoamide dehydrogenase deficiency,
ECM1	247100~Urbach-Wiethe disease,
TBC1D7	248000~Macrocephaly/megalencephaly syndrome, autosomal recessive,
CNGB3	248200~Macular degeneration, juvenile,262300~Achromatopsia-3,
CLDN16	248250~Hypomagnesemia 3, renal,
MLYCD	248360~Malonyl-CoA decarboxylase deficiency,
POLR1C	248390~Treacher Collins syndrome 3,616494~Leukodystrophy, hypomyelinating, 11,
FREM1	248450~Manitoba oculotrichoanal syndrome,608980~Bifid nose with or without anorectal and renal anomalies,614485~Trigonocephaly 2,
MAN2B1	248500~Mannosidosis, alpha-, types I and II,
MANBA	248510~Mannosidosis, beta,
BCKDHB	248600~Maple syrup urine disease, type Ib,
DBT	248600~Maple syrup urine disease, type II,
SIL1	248800~Marinesco-Sjogren syndrome,
SPG21	248900~Mast syndrome,
MKS1	249000~Meckel syndrome 1,615990~Bardet-Biedl syndrome 13,
SLC19A2	249270~Thiamine-responsive megaloblastic anemia syndrome,
SH3PXD2B	249420~Frank-ter Haar syndrome,
PRSS12	249500~Mental retardation, autosomal recessive 1,
PSAP	249900~Metachromatic leukodystrophy due to SAP-b deficiency,610539~Gaucher disease, atypical,611721~Combined SAP deficiency,611722~Krabbe disease, atypical,
HIBCH	250620~3-hydroxyisobutryl-CoA hydrolase deficiency,
CYB5A	250790~Methemoglobinemia, type IV,
CYB5R3	250800~Methemoglobinemia, type I,250800~Methemoglobinemia, type II,
MTR	250940~Homocystinuria-megaloblastic anemia, cblG complementation type,601634~Neural tube defects, folate-sensitive, susceptibility to,
AUH	250950~3-methylglutaconic aciduria, type I,
MMAA	251100~Methylmalonic aciduria, vitamin B12-responsive,
MCEE	251120~Methylmalonyl-CoA epimerase deficiency,
MCPH1	251200~Microcephaly 1, primary, autosomal recessive,
RBBP8	251255~Jawad syndrome,606744~Seckel syndrome 2,Pancreatic carcinoma, somatic~Pancreatic carcinoma, somatic,
NBN	251260~Nijmegen breakage syndrome,609135~Aplastic anemia,613065~Leukemia, acute lymphoblastic,
TUBGCP6	251270~Microcephaly and chorioretinopathy, autosomal recessive, 1,
OCLN	251290~Band-like calcification with simplified gyration and polymicrogyria,
LTBP2	251750~Microspherophakia and/or megalocornea, with ectopia lentis and with or without secondary glaucoma,613086~Glaucoma 3, primary congenital, D,614819~Weill-Marchesani syndrome 3, recessive,
MYO5B	251850~Microvillus inclusion disease,
PNPLA8	251950~Mitochondrial myopathy with lactic acidosis,
NDUFAF5	252010~Mitochondrial complex 1 deficiency,
NDUFB9	252010~Mitochondrial complex I deficiency,
NDUFS1	252010~Mitochondrial complex I deficiency,
NDUFS2	252010~Mitochondrial complex I deficiency,
NDUFS6	252010~Mitochondrial complex I deficiency,
NDUFV2	252010~Mitochondrial complex I deficiency,
NUBPL	252010~Mitochondrial complex I deficiency,
NDUFS3	252010~Mitochondrial complex I deficiency,256000~Leigh syndrome due to mitochondrial complex I deficiency,
NDUFAF2	252010~Mitochondrial complex I deficiency,256000~Leigh syndrome,
NDUFS4	252010~Mitochondrial complex I deficiency,256000~Leigh syndrome,
SDHA	252011~Mitochondrial respiratory chain complex II deficiency,256000~Leigh syndrome,613642~Cardiomyopathy, dilated, 1GG,614165~Paragangliomas 5,
GNPTAB	252500~Mucolipidosis II alpha/beta,252600~Mucolipidosis III alpha/beta,
NAGLU	252920~Mucopolysaccharidosis type IIIB (Sanfilippo B),616491~Charcot-Marie-Tooth disease, axonal, type 2V,
HGSNAT	252930~Mucopolysaccharidosis type IIIC (Sanfilippo C),616544~Retinitis pigmentosa 73,
GNS	252940~Mucopolysaccharidosis type IIID,
GALNS	253000~Mucopolysaccharidosis IVA,
ARSB	253200~Mucopolysaccharidosis type VI (Maroteaux-Lamy),
GUSB	253220~Mucopolysaccharidosis VII,
TRIM37	253250~Mulibrey nanism,
BTD	253260~Biotinidase deficiency,
HLCS	253270~Holocarboxylase synthetase deficiency,
POMGNT1	253280~Muscular dystrophy-dystroglycanopathy (congenital with brain and eye anomalies), type A, 3,613151~Muscular dystrophy-dystroglycanopathy (congenital with mental retardation), type B, 3,613157~Muscular dystrophy-dystroglycanopathy (limb-girdle), type C, 3,
CHRNA1	253290~Multiple pterygium syndrome, lethal type,601462~Myasthenic syndrome, congenital, 1A, slow-channel,608930~Myasthenic syndrome, congenital, 1B, fast-channel,
GLE1	253310~Lethal congenital contracture syndrome 1,611890~Arthrogryposis, lethal, with anterior horn cell disease,
CAPN3	253600~Muscular dystrophy, limb-girdle, type 2A,
DYSF	253601~Muscular dystrophy, limb-girdle, type 2B,254130~Miyoshi muscular dystrophy 1,606768~Myopathy, distal, with anterior tibial onset,
SGCG	253700~Muscular dystrophy, limb-girdle, type 2C,
FKTN	253800~Muscular dystrophy-dystroglycanopathy (congenital with brain and eye anomalies), type A, 4,611588~Muscular dystrophy-dystroglycanopathy (limb-girdle), type C, 4,611615~Cardiomyopathy, dilated, 1X,613152~Muscular dystrophy-dystroglycanopathy (congenital without mental retardation), type B, 4,
TRIM32	254110~Muscular dystrophy, limb-girdle, type 2H,615988~Bardet-Biedl syndrome 11,
EFHC1	254770~Myoclonic epilepsy, juvenile, susceptibility to, 1,607631~Epilepsy, juvenile absence, susceptibility to, 1,
EPM2A	254780~Epilepsy, progressive myoclonic 2A (Lafora),
SCARB2	254900~Epilepsy, progressive myoclonic 4, with or without renal failure,
CPT1A	255120~CPT deficiency, hepatic, type IA,
TPM3	255310~Myopathy, congenital, with fiber-type disproportion,609284~CAP myopathy 1,609284~Nemaline myopathy 1, autosomal dominant or recessive,
STAC3	255995~Native American myopathy,
COX15	256000~Leigh syndrome due to cytochrome c oxidase deficiency,615119~Cardioencephalomyopathy, fatal infantile, due to cytochrome c oxidase deficiency 2,
NDUFA12	256000~Leigh syndrome due to mitochondrial complex 1 deficiency,
NDUFA2	256000~Leigh syndrome due to mitochondrial complex I deficiency,
NDUFA9	256000~Leigh syndrome due to mitochondrial complex I deficiency,
NDUFAF6	256000~Leigh syndrome due to mitochondrial complex I deficiency,
NDUFA10	256000~Leigh syndrome,
NEB	256030~Nemaline myopathy 2, autosomal recessive,
NPHP1	256100~Nephronophthisis 1, juvenile,266900~Senior-Loken syndrome-1,609583~Joubert syndrome 4,
PHGDH	256520~Neu-Laxova syndrome 1,601815~Phosphoglycerate dehydrogenase deficiency,
CTSA	256540~Galactosialidosis,
PLA2G6	256600~Infantile neuroaxonal dystrophy 1,610217~Neurodegeneration with brain iron accumulation 2B,612953~Parkinson disease 14, autosomal recessive,
NME1	256700~Neuroblastoma,
PPT1	256730~Ceroid lipofuscinosis, neuronal, 1,
CLN5	256731~Ceroid lipofuscinosis, neuronal, 5,
MPV17	256810~Mitochondrial DNA depletion syndrome 6 (hepatocerebral type),
CCT5	256840~Neuropathy, hereditary sensory, with spastic paraplegia,
GAN	256850~Giant axonal neuropathy-1,
NPC1	257220~Niemann-Pick disease, type C1,257220~Niemann-Pick disease, type D,
RELN	257320~Lissencephaly 2 (Norman-Roberts type),616436~Epilepsy, familial temporal lobe, 7,
MASP1	257920~3MC syndrome 1,
SAG	258100~Oguchi disease-1,613758~Retinitis pigmentosa 47,
GPC6	258315~Omodysplasia 1,
INPPL1	258480~Opsismodysplasia,
TCTN3	258860~Orofaciodigital syndrome IV,614815~Joubert syndrome 18,
OAT	258870~Gyrate atrophy of choroid and retina with or without ornithinemia,
ZBTB20	259050~Primrose syndrome,
FKBP10	259450~Bruck syndrome 1,610968~Osteogenesis imperfecta, type XI,
MMP2	259600~Multicentric osteolysis, nodulosis, and arthropathy,
TNFSF11	259710~Osteopetrosis, autosomal recessive 2,
OSTM1	259720~Osteopetrosis, autosomal recessive 5,
CA2	259730~Osteopetrosis, autosomal recessive 3, with renal tubular acidosis,
FAM20C	259775~Raine syndrome,
FBXO7	260300~Parkinson disease 15, autosomal recessive,
SBDS	260400~Shwachman-Diamond syndrome,609135~Aplastic anemia, susceptibility to,
AIMP1	260600~Leukodystrophy, hypomyelinating, 3,
TBX15	260660~Cousin syndrome,
CUBN	261100~Megaloblastic anemia-1, Finnish type,
B3GLCT	261540~Peters-plus syndrome,
AMHR2	261550~Persistent Mullerian duct syndrome, type II,
PAH	261600~Hyperphenylalaninemia, non-PKU mild,261600~Phenylketonuria,
QDPR	261630~Hyperphenylalaninemia, BH4-deficient, C,
PTS	261640~Hyperphenylalaninemia, BH4-deficient, A,
PCK2	261650~PEPCK deficiency, mitochondrial,
PGAM2	261670~Glycogen storage disease X,
PCK1	261680~Phosphoenolpyruvate carboxykinase-1, cytosolic, deficiency,
PHKB	261750~Phosphorylase kinase deficiency of liver and muscle, autosomal recessive,
LHX4	262700~Pituitary hormone deficiency, combined, 4,
ANO6	262890~Scott syndrome,
PKHD1	263200~Polycystic kidney and hepatic disease,
NEK1	263520~Short-rib thoracic dysplasia 6 with or without polydactyly,
RIPK4	263650~Popliteal pterygium syndrome, Bartsocas-Papas type,
UROS	263700~Porphyria, congenital erythropoietic,
SLC12A3	263800~Gitelman syndrome,
PCBD1	264070~Hyperphenylalaninemia, BH4-deficient, D,
PGR	264080~Progesterone resistance,
HSD17B3	264300~Pseudohermaphroditism, male, with gynecomastia,
SCNN1A	264350~Pseudohypoaldosteronism, type I,613021~Bronchiectasis with or without elevated sweat chloride 2,
ACOX1	264470~Peroxisomal acyl-CoA oxidase deficiency,
SRD5A2	264600~Pseudovaginal perineoscrotal hypospadias,
XYLT2	264800~Pseudoxanthoma elasticum, modifier of severity of,605822~Spondyloocular syndrome,
XYLT1	264800~Pseudoxanthoma elasticum, modifier of severity of,615777~Desbuquois dysplasia 2,
COLEC11	265050~3MC syndrome 2,
SLC34A2	265100~Pulmonary alveolar microlithiasis,610441~Testicular microlithiasis,
SFTPB	265120~Surfactant metabolism dysfunction, pulmonary, 1,
ALDH7A1	266100~Epilepsy, pyridoxine-dependent,
NT5C3A	266120~Anemia, hemolytic, due to UMPH1 deficiency,
PC	266150~Pyruvate carboxylase deficiency,
PHYH	266500~Refsum disease,
IFT140	266920~Short-rib thoracic dysplasia 9 with or without polydactyly,
DIS3L2	267000~Perlman syndrome,
ATP6V1B1	267300~Renal tubular acidosis with deafness,
REN	267430~Renal tubular dysgenesis,613092~Hyperuricemic nephropathy, familial juvenile 2,Hyperproreninemia~Hyperproreninemia,
AK2	267500~Reticular dysgenesis,
COL18A1	267750~Knobloch syndrome, type 1,
LPIN1	268200~Myoglobinuria, acute recurrent, autosomal recessive,
FOXO1	268220~Rhabdomyosarcoma, alveolar,
ESCO2	268300~Roberts syndrome,269000~SC phocomelia syndrome,
EIF4A3	268305~Robin sequence with cleft mandible and limb anomalies,
HEXB	268800~Sandhoff disease, infantile, juvenile, and adult forms,
SARDH	268900~Sarcosinemia,
SETBP1	269150~Schinzel-Giedion midface retraction syndrome,616078~Mental retardation, autosomal dominant 29,
SLC35D1	269250~Schneckenbecken dysplasia,
PXDN	269400~Corneal opacification and other ocular anomalies,
BSCL2	269700~Lipodystrophy, congenital generalized, type 2,270685~Silver spastic paraplegia syndrome,600794~Neuropathy, distal hereditary motor, type VA,615924~Encephalopathy, progressive, with or without lipodystrophy,
PIK3R1	269880~SHORT syndrome,615214~Agammaglobulinemia 7, autosomal recessive,616005~Immunodeficiency 36,
SLC17A5	269920~Sialic acid storage disorder, infantile,604369~Salla disease,
GNE	269921~Sialuria,605820~Nonaka myopathy,
NODAL	270100~Heterotaxy, visceral, 5,
ALDH3A2	270200~Sjogren-Larsson syndrome,
DHCR7	270400~Smith-Lemli-Opitz syndrome,
IGF1R	270450~Insulin-like growth factor I, resistance to,
SACS	270550~Spastic ataxia, Charlevoix-Saguenay type,
ZFYVE26	270700~Spastic paraplegia 15, autosomal recessive,
CYP7B1	270800~Spastic paraplegia 5A, autosomal recessive,613812~Bile acid synthesis defect, congenital, 3,
SYCP3	270960~Spermatogenic failure 4,Pregnancy loss, susceptibility to~Pregnancy loss, susceptibility to,
B3GALT6	271640~Spondyloepimetaphyseal dysplasia with joint laxity, type 1, with or without fractures,615349~Ehlers-Danlos syndrome, progeroid type, 2,
DDR2	271665~Spondylometaepiphyseal dysplasia, short limb-hand type,
ASPA	271900~Canavan disease,
NUP62	271930~Striatonigral degeneration, infantile,
ALDH5A1	271980~Succinic semialdehyde dehydrogenase deficiency,
SUMF1	272200~Multiple sulfatase deficiency,
CRLF1	272430~Cold-induced sweating syndrome 1,
CKAP2L	272440~Filippi syndrome,
GM2A	272750~GM2-gangliosidosis, AB variant,
HEXA	272800~GM2-gangliosidosis, several forms,272800~Hex A pseudodeficiency,272800~Tay-Sachs disease,
WNT3	273395~Tetra-amelia syndrome,
CUL7	273750~3-M syndrome 1,
RBM8A	274000~Thrombocytopenia-absent radius syndrome,
ADAMTS13	274150~Thrombotic thrombocytopenic purpura, familial,
DPYD	274270~5-fluorouracil toxicity,274270~Dihydropyrimidine dehydrogenase deficiency,
SLC5A5	274400~Thyroid dyshormonogenesis 1,
TPO	274500~Thyroid dyshormonogenesis 2A,
SLC26A4	274600~Pendred syndrome,600791~Deafness, autosomal recessive 4, with enlarged vestibular aqueduct,
TG	274700~Thyroid dyshormonogenesis 3,608175~Autoimmune thyroid disease, susceptibility to, 3,
IYD	274800~Thyroid dyshormonogenesis 4,
TSHB	275100~Hypothryoidism, congenital, nongoitrous 4,
ZMPSTE24	275210~Restrictive dermopathy, lethal,608612~Mandibuloacral dysplasia with type B lipodystrophy,
TNFRSF10B	275355~Squamous cell carcinoma, head and neck,
ING1	275355~Squamous cell carcinoma, head and neck, somatic,
ABHD5	275630~Chanarin-Dorfman syndrome,
MSH6	276300~Mismatch repair cancer syndrome,608089~Endometrial cancer, familial,614350~Colorectal cancer, hereditary nonpolyposis, type 5,
PMS2	276300~Mismatch repair cancer syndrome,614337~Colorectal cancer, hereditary nonpolyposis, type 4,
TAT	276600~Tyrosinemia, type II,
FAH	276700~Tyrosinemia, type I,
UROC1	276880~Urocanase deficiency,
MYO7A	276900~Usher syndrome, type 1B,600060~Deafness, autosomal recessive 2,601317~Deafness, autosomal dominant 11,
USH2A	276901~Usher syndrome, type 2A,613809~Retinitis pigmentosa 39,
CLRN1	276902~Usher syndrome, type 3A,614180~Retinitis pigmentosa 61,
LMBRD1	277380~Methylmalonic aciduria and homocystinuria, cblF type,
GGCX	277450~Vitamin K-dependent clotting factors, combined deficiency of, 1,610842~Pseudoxanthoma elasticum-like disorder with multiple coagulation factor deficiency,
TTPA	277460~Ataxia with isolated vitamin E deficiency,
EDNRB	277580~Waardenburg syndrome, type 4A,600155~Hirschsprung disease, susceptibility to, 2,600501~ABCD syndrome,
EZH2	277590~Weaver syndrome,
ADAMTS10	277600~Weill-Marchesani syndrome 1, recessive,
WRN	277700~Werner syndrome,
ATP7B	277900~Wilson disease,
LIPA	278000~Cholesteryl ester storage disease,278000~Wolman disease,
LPAR6	278150~Hypotrichosis 8,278150~Woolly hair, autosomal recessive 1, with or without hypotrichosis,
XDH	278300~Xanthinuria, type I,
XPC	278720~Xeroderma pigmentosum, group C,
ERCC5	278780~Xeroderma pigmentosum, group G,278780~Xeroderma pigmentosum, group G/Cockayne syndrome,616570~Cerebrooculofacioskeletal syndrome 3,
PIGL	280000~CHIME syndrome,
MID1	300000~Opitz GBBB syndrome, type I,
ARX	300004~Proud syndrome,300215~Hydranencephaly with abnormal genitalia,300215~Lissencephaly, X-linked 2,300419~Mental retardation, X-linked 29 and others,308350~Epileptic encephalopathy, early infantile, 1,309510~Partington syndrome,
CLCN5	300009~Dent disease,300554~Hypophosphatemic rickets,308990~Proteinuria, low molecular weight, with hypercalciuric nephrocalcinosis,310468~Nephrolithiasis, type I,
RPGR	300029~Retinitis pigmentosa 3,300455~Retinitis pigmentosa, X-linked, and sinorespiratory infections, with or without deafness,300834~Macular degeneration, X-linked atrophic,304020~Cone-rod dystrophy, X-linked, 1,
MECP2	300055~Mental retardation, X-linked, syndromic 13,300260~Mental retardation, X-linked syndromic, Lubs type,300496~Autism susceptibility, X-linked 3,300673~Encephalopathy, neonatal severe,312750~Rett syndrome,312750~Rett syndrome, atypical,312750~Rett syndrome, preserved speech variant,
SMPX	300066~Deafness, X-linked 4,
DCX	300067~Lissencephaly, X-linked,300067~Subcortical laminal heteropia, X-linked,
PCDH19	300088~Epileptic encephalopathy, early infantile, 9,
IL1RAPL1	300143~Mental retardation, X-linked 21/34,
BCOR	300166~Microphthalmia, syndromic 2,
OFD1	300209~Simpson-Golabi-Behmel syndrome, type 2,300424~Retinitis pigmentosa 23,300804~Joubert syndrome 10,311200~Orofaciodigital syndrome I,
TSPAN7	300210~Mental retardation, X-linked 58,
RBMX	300238~Mental retardation, X-linked, syndromic 11, Shashi type,
SLC9A6	300243~Mental retardation, X-linked syndromic, Christianson type,
LAMP2	300257~Danon disease,
PHF8	300263~Mental retardation syndrome, X-linked, Siderius type,
IKBKG	300291~Ectodermal dysplasia, hypohidrotic, with immune deficiency,300301~Ectodermal, dysplasia, anhidrotic, lymphedema and immunodeficiency,300584~Immunodeficiency, isolated,300636~Immunodeficiency 33,300640~Invasive pneumococcal disease, recurrent isolated, 2,308300~Incontinentia pigmenti,
CUL4B	300354~Mental retardation, X-linked, syndromic 15 (Cabezas type),
DMD	300376~Becker muscular dystrophy,302045~Cardiomyopathy, dilated, 3B,310200~Duchenne muscular dystrophy,
ACSL4	300387~Mental retardation, X-linked 63,
CASK	300422~FG syndrome 4,300422~Mental retardation, with or without nystagmus,300749~Mental retardation and microcephaly with pontine and cerebellar hypoplasia,
ATP6AP2	300423~Mental retardation, X-linked, syndromic, Hedera type,300911~Parkinsonism with spasticity, X-linked,
NLGN3	300425~Autism susceptibility, X-linked 1,300494~Asperger syndrome susceptibility, X-linked 1,
SHROOM4	300434~Stocco dos Santos X-linked mental retardation syndrome,
ARHGEF6	300436~Mental retardation, X-linked 46,
ATRX	300448~Alpha-thalassemia myelodysplasia syndrome, somatic,301040~Alpha-thalassemia/mental retardation syndrome,309580~Mental retardation-hypotonic facies syndrome, X-linked,Mental retardation, X-linked 52~Mental retardation, X-linked 52,
IGBP1	300472~Corpus callosum, agenesis of, with mental retardation, ocular coloboma and micrognathia,
OPHN1	300486~Mental retardation, X-linked, with cerebellar hypoplasia and distinctive facial appearance,
ATP7A	300489~Spinal muscular atrophy, distal, X-linked 3,304150~Occipital horn syndrome,309400~Menkes disease,
SYN1	300491~Epilepsy, X-linked, with variable learning disabilities and behavior disorders,
NLGN4X	300495~Autism susceptibility, X-linked 2,300495~Mental retardation, X-linked,300497~Asperger syndrome susceptibility, X-linked 2,
ZNF81	300498~Mental retardation, X-linked 45,
GPR143	300500~Ocular albinism, type I, Nettleship-Falls type,300814~Nystagmus 6, congenital, X-linked,
DIAPH2	300511~Premature ovarian failure,
SLC16A2	300523~Allan-Herndon-Dudley syndrome,
KDM5C	300534~Mental retardation, X-linked, syndromic, Claes-Jensen type,
OCRL	300555~Dent disease 2,309000~Lowe syndrome,
PAK3	300558~Mental retardation, X-linked 30/47,
PHKA1	300559~Muscle glycogenosis,
ZDHHC15	300577~Mental retardation, X-linked 91,
POF1B	300604~Premature ovarian failure 2B,
ARHGEF9	300607~Epileptic encephalopathy, early infantile, 8,
AIFM1	300614~Deafness, X-linked 5,300816~Combined oxidative phosphorylation deficiency 6,310490~Cowchock syndrome,Cowchock syndrome~Cowchock syndrome,
MAOA	300615~Brunner syndrome,
FMR1	300623~Fragile X tremor/ataxia syndrome,300624~Fragile X syndrome,311360~Premature ovarian failure 1,
XIAP	300635~Lymphoproliferative syndrome, X-linked, 2,
SRPX2	300643~Rolandic epilepsy, mental retardation, and speech dyspraxia,
PGK1	300653~Phosphoglycerate kinase 1 deficiency,
BRWD3	300659~Mental retardation, X-linked 93,
PRPS1	300661~Gout, PRPS-related,300661~Phosphoribosylpyrophosphate synthetase superactivity,301835~Arts syndrome,304500~Deafness, X-linked 1,311070~Charcot-Marie-Tooth disease, X-linked recessive, 5,
CDKL5	300672~Epileptic encephalopathy, early infantile, 2,
UPF3B	300676~Mental retardation, X-linked, syndromic 14,
FHL1	300695~Scapuloperoneal myopathy, X-linked dominant,300696~Emery-Dreifuss muscular dystrophy 6, X-linked,300696~Myopathy, X-linked, with postural muscle atrophy,300717~Reducing body myopathy, X-linked 1a, severe, infantile or early childhood onset,300718~Reducing body myopathy, X-linked 1b, with late childhood or adult onset,
GRIA3	300699~Mental retardation, X-linked 94,
HUWE1	300706~Mental retardation, X-linked syndromic, Turner type,
BTK	300755~Agammaglobulinemia, X-linked 1,307200~Agammaglobulinemia and isolated hormone deficiency,
MAMLD1	300758~Hypospadias 2, X-linked,
CSF2RA	300770~Surfactant metabolism dysfunction, pulmonary, 4,
ZDHHC9	300799~Mental retardation, X-linked syndromic, Raymond type,
SYP	300802~Mental retardation, X-linked 96,
ZNF711	300803~Mental retardation, X-linked 97,
PIGA	300818~Paroxysmal nocturnal hemoglobinuria, somatic,300868~Multiple congenital anomalies-hypotonia-seizures syndrome 2,
NSDHL	300831~CK syndrome,308050~CHILD syndrome,
RPS6KA3	300844~Mental retardation, X-linked 19,303600~Coffin-Lowry syndrome,
RPL10	300847~Autism, susceptibility to, X-linked 5,
GDI1	300849~Mental retardation, X-linked 41,
DLG3	300850~Mental retardation, X-linked 90,
MAGT1	300853~Immunodeficiency, X-linked, with magnesium defect, Epstein-Barr virus infection and neoplasia,
UBE2A	300860~Mental retardation, X-linked syndromic, Nascimento-type,
KDM6A	300867~Kabuki syndrome 2,
TMLHE	300872~Epsilon-trimethyllysine hydroxylase deficiency,
HDAC8	300882~Cornelia de Lange syndrome 5,309585~Wilson-Turner syndrome,
ALG13	300884~Congenital disorder of glycosylation, type Is,
CLIC2	300886~Mental retardation, X-linked, syndromic 32,
COX7B	300887~Linear skin defects with multiple congenital anomalies,
IGSF1	300888~Hypothyroidism, central, and testicular enlargement,
PDK3	300905~Charcot-Marie-Tooth disease, X-linked dominant, 6,
XPNPEP2	300909~Angioedema induced by ACE inhibitors, susceptibility to,
PLS3	300910~Bone mineral density QTL18, osteoporosis,
COL4A6	300914~Deafness, X-linked 6,
MBTPS2	300918~Olmsted syndrome, X-linked,308205~IFAP syndrome with or without BRESHECK syndrome,308800~Keratosis follicularis spinulosa decalvans, X-linked,
USP9X	300919~Mental retardation, X-linked 99,
KIF4A	300923~Mental retardation, X-linked 100,
MID2	300928~Mental retardation, X-linked 101,
EBP	300960~MEND syndrome,302960~Chondrodysplasia punctata, X-linked dominant,
CCDC22	300963~Ritscher-Schinzel syndrome 2,
COL4A5	301050~Alport syndrome,
ABCB7	301310~Anemia, sideroblastic, with ataxia,
UBA1	301830~Spinal muscular atrophy, X-linked 2, infantile,
PHF6	301900~Borjeson-Forssman-Lehmann syndrome,
NHS	302200~Cataract 40, X-linked,302350~Nance-Horan syndrome,
ATP2B3	302500~Spinocerebellar ataxia, X-linked 1,
GJB1	302800~Charcot-Marie-Tooth neuropathy, X-linked dominant, 1,
CHM	303100~Choroideremia,
AP1S2	304340~Mental retardation, X-linked syndromic 5,
DKC1	305000~Dyskeratosis congenita, X-linked,
EDA	305100~Ectodermal dysplasia 1, hypohidrotic, X-linked,313500~Tooth agenesis, selective, X-linked 1,
FGD1	305400~Aarskog-Scott syndrome,305400~Mental retardation, X-linked syndromic 16,
PHKA2	306000~Glycogen storage disease, type IXa1,306000~Glycogen storage disease, type IXa2,
F8	306700~Hemophilia A,
GK	307030~Glycerol kinase deficiency,
PHEX	307800~Hypophosphatemic rickets, X-linked dominant,
STS	308100~Ichthyosis, X-linked,
SH2D1A	308240~Lymphoproliferative syndrome, X-linked, 1,
ANOS1	308700~Hypogonadotropic hypogonadism 1 with or without anosmia (Kallmann syndrome 1),
TEX11	309120~Spermatogenic failure, X-linked, 2,
IQSEC2	309530~Mental retardation, X-linked 1,
AFF2	309548~Mental retardation, X-linked, FRAXE type,
SMS	309583~Mental retardation, X-linked, Snyder-Robinson type,
FGF16	309630~Metacarpal 4-5 fusion,
IDS	309900~Mucopolysaccharidosis II,
MTM1	310400~Myotubular myopathy, X-linked,
VMA21	310440~Myopathy, X-linked, with excessive autophagy,
POLA1	310465~N syndrome,
NYX	310500~Night blindness, congenital stationary (complete), 1A, X-linked,
FRMD7	310700~Nystagmus 1, congenital, X-linked,310700~Nystagmus, infantile periodic alternating, X-linked,
OTC	311250~Ornithine transcarbamylase deficiency,
RBM10	311900~TARP syndrome,
RS1	312700~Retinoschisis,
TRAPPC2	313400~Spondyloepiphyseal dysplasia tarda,
TAF1	314250~Dystonia-Parkinsonism, X-linked,
ZC4H2	314580~Wieacker-Wolff syndrome,
USP9Y	415000~Spermatogenic failure, Y-linked, 2,
TRMU	580000~Deafness, mitochondrial, modifier of,613070~Liver failure, transient infantile,
PRPF8	600059~Retinitis pigmentosa 13,
CYP2R1	600081~Rickets due to defect in vitamin D 25-hydroxylation,
KCNQ4	600101~Deafness, autosomal dominant 2A,
RAB3GAP1	600118~Warburg micro syndrome 1,
AGPS	600121~Chondrodysplasia punctata, rhizomelic, type 3,
PRPF31	600138~Retinitis pigmentosa 11,
HTRA1	600142~CARASIL syndrome,610149~Macular degeneration, age-related, 7,610149~Macular degeneration, age-related, neovascular type,
CLN8	600143~Ceroid lipofuscinosis, neuronal, 8,610003~Ceroid lipofuscinosis, neuronal, 8, Northern epilepsy variant,
TEK	600195~Venous malformations, multiple cutaneous and mucosal,
KIAA0319	600202~Dyslexia, susceptibility to, 2,
SPTBN2	600224~Spinocerebellar ataxia 5,615386~Spinocerebellar ataxia, autosomal recessive 14,
PTPRZ1	600263~H. pylori infection, susceptibility to,
MYO15A	600316~Deafness, autosomal recessive 3,
TTN	600334~Tibial muscular dystrophy, tardive,603689~Myopathy, proximal, with early respiratory muscle involvement,604145~Cardiomyopathy, dilated, 1G,608807~Muscular dystrophy, limb-girdle, type 2J,611705~Myopathy, early-onset, with fatal cardiomyopathy,613765~Cardiomyopathy, familial hypertrophic, 9,
NIPA1	600363~Spastic paraplegia 6, autosomal dominant,
LONP1	600373~CODAS syndrome,
ACVRL1	600376~Telangiectasia, hereditary hemorrhagic, type 2,
LGI1	600512~Epilepsy, familial temporal lobe, 1,
BMP4	600625~Orofacial cleft 11,607932~Microphthalmia, syndromic 6,
TUBB3	600638~Fibrosis of extraocular muscles, congenital, 3A,614039~Cortical dysplasia, complex, with other brain malformations 1,
MYH14	600652~Deafness, autosomal dominant 4A,614369~Peripheral neuropathy, myopathy, hoarseness, and hearing loss,
KCNJ10	600791~Enlarged vestibular aqueduct, digenic,612780~SESAME syndrome,
CHMP2B	600795~Dementia, familial, nonspecific,614696~Amyotrophic lateral sclerosis 17,
JAK3	600802~SCID, autosomal recessive, T-negative/B-positive type,
ABCB4	600803~Gallbladder disease 1,602347~Cholestasis, progressive familial intrahepatic 3,614972~Cholestasis, intrahepatic, of pregnancy, 3,
ALOX5	600807~Asthma, diminished response to antileukotriene treatment in,Atherosclerosis, susceptibility to~Atherosclerosis, susceptibility to,
MUC7	600807~Asthma, protection against,
HNMT	600807~Asthma, susceptibility to,
SCGB3A2	600807~Asthma, susceptibility to,
CCL11	600807~Asthma, susceptibility to,609423~HIV1, resistance to,
CA4	600852~Retinitis pigmentosa 17,
RAB7A	600882~Charcot-Marie-Tooth disease, type 2B,
FANCE	600901~Fanconi anemia, complementation group E,
ANK2	600919~Cardiac arrhythmia, ankyrin-B-related,600919~Long QT syndrome 4,
PCSK1	600955~Obesity with impaired prohormone processing,612362~Obesity, susceptibility to, BMIQ12,
TMC1	600974~Deafness, autosomal recessive 7,606705~Deafness, autosomal dominant 36,
PITPNM3	600977~Cone-rod dystrophy 5,
RYR2	600996~Arrhythmogenic right ventricular dysplasia 2,604772~Ventricular tachycardia, catecholaminergic polymorphic, 1,
CACNA1C	601005~Timothy syndrome,611875~Brugada syndrome 3,
SLC2A1	601042~Dystonia 9,606777~GLUT1 deficiency syndrome 1, infantile onset, severe,608885~Stomatin-deficient cryohydrocytosis with neurologic defects,612126~GLUT1 deficiency syndrome 2, childhood onset,614847~Epilepsy, idiopathic generalized, susceptibility to, 12,
CDH23	601067~Usher syndrome, type 1D,601067~Usher syndrome, type 1D/F digenic,601386~Deafness, autosomal recessive 12,
PCDH15	601067~Usher syndrome, type 1D/F digenic,602083~Usher syndrome, type 1F,609533~Deafness, autosomal recessive 23,
OTOF	601071~Auditory neuropathy, autosomal recessive, 1,601071~Deafness, autosomal recessive 9,
TMPRSS3	601072~Deafness, autosomal recessive 8/10,
MAF	601088~Ayme-Gripp syndrome,610202~Cataract 21, multiple types,
LITAF	601098~Charcot-Marie-Tooth disease, type 1C,
ALG3	601110~Congenital disorder of glycosylation, type Id,
MFN2	601152~Hereditary motor and sensory neuropathy VIA,609260~Charcot-Marie-Tooth disease, type 2A2,
JUP	601214~Naxos disease,611528~Arrhythmogenic right ventricular dysplasia 12,
LTBP3	601216~Dental anomalies and short stature,
ATCAY	601238~Ataxia, cerebellar, Cayman type,
CAPN10	601283~Diabetes mellitus, noninsulin-dependent 1,
SGCD	601287~Muscular dystrophy, limb-girdle, type 2F,606685~Cardiomyopathy, dilated, 1L,
EYA4	601316~Deafness, autosomal dominant 10,605362~Cardiomyopathy, dilated, 1J,
BICC1	601331~Renal dysplasia, cystic, susceptibility to,
SMARCA2	601358~Nicolaides-Baraitser syndrome,
PRKCH	601367~Cerebral infarction, susceptibility to,
ALOX5AP	601367~Stroke, susceptibility to,
COCH	601369~Deafness, autosomal dominant 9,
MTMR2	601382~Charcot-Marie-Tooth disease, type 4B1,
ATP2B2	601386~Deafness, autosomal recessive 12, modifier of,
RUNX1	601399~Platelet disorder, familial, with associated myeloid malignancy,601626~Leukemia, acute myeloid,
PLAGL1	601410~Diabetes mellitus, transient neonatal,
PRPF3	601414~Retinitis pigmentosa 18,
NDRG1	601455~Charcot-Marie-Tooth disease, type 4D,
HYAL1	601492~Mucopolysaccharidosis type IX,
LDB3	601493~Cardiomyopathy, dilated, 1C, with or without LVNC,601493~Cardiomyopathy, hypertrophic, 24,601493~Left ventricular noncompaction 3,609452~Myopathy, myofibrillar, 4,
TECTA	601543~Deafness, autosomal dominant 8/12,603629~Deafness, autosomal recessive 21,
CRYBB2	601547~Cataract 3, multiple types,
ASPH	601552~Traboulsi syndrome,
LIFR	601559~Stuve-Wiedemann syndrome/Schwartz-Jampel type 2 syndrome,
POU6F2	601583~Wilms tumor susceptibility-5,
SH3TC2	601596~Charcot-Marie-Tooth disease, type 4C,613353~Mononeuropathy of the median nerve, mild,
CHIC2	601626~Leukemia, acute myeloid,
MLF1	601626~Leukemia, acute myeloid,
MLLT10	601626~Leukemia, acute myeloid,
SH3GL1	601626~Leukemia, acute myeloid,
FLT3	601626~Leukemia, acute myeloid, reduced survival in, somatic,601626~Leukemia, acute myeloid, somatic,613065~Leukemia, acute lymphoblastic, somatic,
PICALM	601626~Leukemia, acute myeloid, somatic,
NUP214	601626~Leukemia, acute myeloid, somatic,613065~Leukemia, T-cell acute lymphoblastic, somatic,
ETV6	601626~Leukemia, acute myeloid, somatic,616216~Thrombocytopenia 5,
LPP	601626~Leukemia, acute myeloid,Lipoma~Lipoma,
CBFB	601626~Myeloid leukemia, acute, M4/M4Eo subtype, somatic,
SDHAF2	601650~Paragangliomas 2,
SDC3	601665~Obesity, association with,
SIM1	601665~Obesity, severe,
CARTPT	601665~Obesity, susceptibility to,
UCP1	601665~Obesity, susceptibility to,
PPARGC1B	601665~Obesity, variation in,
SLC12A1	601678~Bartter syndrome, type 1,
FOXN1	601705~T-cell immunodeficiency, congenital alopecia, and nail dystrophy,
ABCB11	601847~Cholestasis, progressive familial intrahepatic 2,605479~Cholestasis, benign recurrent intrahepatic, 2,
FAS	601859~Autoimmune lymphoproliferative syndrome,601859~Autoimmune lymphoproliferative syndrome, type IA,Squamous cell carcinoma, burn scar-related, somatic~Squamous cell carcinoma, burn scar-related, somatic,
GIPC3	601869~Deafness, autosomal recessive 15,
GJA3	601885~Cataract 14, multiple types,
FN1	601894~Glomerulopathy with fibronectin deposits 2,614101~Plasma fibronectin deficiency,
IL2RA	601942~Diabetes, mellitus, insulin-dependent, susceptibility to, 10,606367~Immunodeficiency 41 with lymphoproliferation and autoimmunity,
POMP	601952~Keratosis linearis with ichthyosis congenita and sclerosing keratoderma,
TRPM6	602014~Hypomagnesemia 1, intestinal,
FMO3	602079~Trimethylaminuria,
FOXP2	602081~Speech-language disorder-1,
INVS	602088~Nephronophthisis 2, infantile,
KDR	602089~Hemangioma, capillary infantile, somatic,602089~Hemangioma, capillary infantile, susceptibility to,
GUCA1A	602093~Cone dystrophy-3,602093~Cone-rod dystrophy 14,
SPG11	602099~Amyotrophic lateral sclerosis 5, juvenile,604360~Spastic paraplegia 11, autosomal recessive,616668~Charcot-Marie-Tooth disease, axonal, type 2X,
MMP13	602111~Metaphyseal anadysplasia 1,602111~Spondyloepimetaphyseal dysplasia, Missouri type,
DHCR24	602398~Desmosterolosis,
SETX	602433~Amyotrophic lateral sclerosis 4, juvenile,606002~Spinocerebellar ataxia, autosomal recessive 1,
DCLRE1C	602450~Severe combined immunodeficiency, Athabascan type,603554~Omenn syndrome,
ETHE1	602473~Ethylmalonic encephalopathy,
GNAI3	602483~Auriculocondylar syndrome 1,
USF1	602491~Hyperlipidemia, familial combined, susceptibility to,
MPI	602579~Congenital disorder of glycosylation, type Ib,
CNBP	602668~Myotonic dystrophy 2,
ATP6V0A4	602722~Renal tubular acidosis, distal, autosomal recessive,
EYS	602772~Retinitis pigmentosa 25,
SLC29A3	602782~Histiocytosis-lymphadenopathy plus syndrome,
NPR2	602875~Acromesomelic dysplasia, Maroteaux type,615923~Epiphyseal chondrodysplasia, Miura type,616255~Short stature with nonspecific skeletal abnormalities,
NRG1	603013~Schizophrenia, susceptibility to,
COLQ	603034~Myasthenic syndrome, congenital, 5,
PLEKHA1	603075~Age-related maculopathy, susceptibility to,
HMCN1	603075~Macular degeneration, age-related, 1,
ALG6	603147~Congenital disorder of glycosylation, type Ic,
STX16	603233~Pseudohypoparathyroidism, type IB,
ACTN4	603278~Glomerulosclerosis, focal segmental, 1,
CCM2	603284~Cerebral cavernous malformations-2,
PDCD10	603285~Cerebral cavernous malformations 3,
TSHR	603373~Hyperthyroidism, familial gestational,609152~Hyperthyroidism, nonautoimmune,Hypothyroidism, congenital, nongoitrous, 1 275200~Hypothyroidism, congenital, nongoitrous, 1 275200,Thyroid adenoma, hyperfunctioning, somatic~Thyroid adenoma, hyperfunctioning, somatic,Thyroid carcinoma with thyrotoxicosis~Thyroid carcinoma with thyrotoxicosis,
PIK3R2	603387~Megalencephaly-polymicrogyria-polydactyly-hydrocephalus syndrome 1,
SLC25A13	603471~Citrullinemia, adult-onset type II,605814~Citrullinemia, type II, neonatal-onset,
DNAJB6	603511~Muscular dystrophy, limb-girdle, type 1E,
GAD1	603513~Cerebral palsy, spastic quadriplegic, 1,
ATXN10	603516~Spinocerebellar ataxia 10,
KIF22	603546~Spondyloepimetaphyseal dysplasia with joint laxity, type 2,
STX11	603552~Hemophagocytic lymphohistiocytosis, familial, 4,
SLC35A1	603585~Congenital disorder of glycosylation, type IIf,
RIMS1	603649~Cone-rod dystrophy 7,
ZSWIM6	603671~Acromelic frontonasal dysostosis,
EPHB2	603688~Prostate cancer/brain cancer susceptibility, somatic,
STRC	603720~Deafness, autosomal recessive 16,
KAT6B	603736~SBBYSS syndrome,606170~Genitopatellar syndrome,
PROM1	603786~Stargardt disease 4,608051~Macular dystrophy, retinal, 2,612095~Retinitis pigmentosa 41,612657~Cone-rod dystrophy 12,
EIF2B3	603896~Leukoencephalopathy with vanishing white matter,
EIF2B2	603896~Leukoencephalopathy with vanishing white matter,603896~Ovarioleukodystrophy,
CASP10	603909~Autoimmune lymphoproliferative syndrome, type II,605027~Lymphoma, non-Hodgkin, somatic,613659~Gastric cancer, somatic,
CILP	603932~Lumbar disc disease, susceptibility to,
THBS2	603932~Lumbar disc herniation, susceptibility to,
TRPC6	603965~Glomerulosclerosis, focal segmental, 2,
DNMT1	604121~Cerebellar ataxia, deafness, and narcolepsy, autosomal dominant,614116~Neuropathy, hereditary sensory, type IE,
CTDP1	604168~Congenital cataracts, facial dysmorphism, and neuropathy,
DTNA	604169~Left ventricular noncompaction 1, with or without congenital heart defects,
USB1	604173~Poikiloderma with neutropenia,
KIF5A	604187~Spastic paraplegia 10, autosomal dominant,
GPSM2	604213~Chudley-McCullough syndrome,
SERPINI1	604218~Encephalopathy, familial, with neuroserpin inclusion bodies,
SPATA7	604232~Leber congenital amaurosis 3,604232~Retinitis pigmentosa, juvenile, autosomal recessive,
SCN1B	604233~Epilepsy, generalized, with febrile seizures plus, type 1,612838~Brugada syndrome 5,612838~Cardiac conduction defect, nonspecific,615377~Atrial fibrillation, familial, 13,
TFR2	604250~Hemochromatosis, type 3,
ATPAF2	604273~Mitochondrial complex V (ATP synthase) deficiency, nuclear type 1,
SLC4A4	604278~Renal tubular acidosis, proximal, with ocular abnormalities,
SGCB	604286~Muscular dystrophy, limb-girdle, type 2E,
CP	604290~Cerebellar ataxia,604290~Hemosiderosis, systemic, due to aceruloplasminemia,604290~Hypoceruloplasminemia, hereditary,
WDR62	604317~Microcephaly 2, primary, autosomal recessive, with or without cortical malformations,
IGHMBP2	604320~Neuronopathy, distal hereditary motor, type VI,616155~Charcot-Marie-Tooth disease, axonal, type 2S,
KNL1	604321~Microcephaly 4, primary, autosomal recessive,
PPP2R2B	604326~Spinocerebellar ataxia 12,
PER2	604348~Advanced sleep phase syndrome, familial, 1,
ADGRV1	604352~Febrile seizures, familial, 4,605472~Usher syndrome, type 2C,605472~Usher syndrome, type 2C, GPR98/PDZD7 digenic,
CHN1	604356~Duane retraction syndrome 2,
DEPDC5	604364~Epilepsy, familial focal, with variable foci,
PPP1R3A	604367~Insulin resistance, severe, digenic,
BRCA1	604370~Breast-ovarian cancer, familial, 1,614320~Pancreatic cancer, susceptibility to, 4,
LIPH	604379~Hypotrichosis 7,604379~Woolly hair, autosomal recessive 2 with or without hypotrichosis,
MRE11	604391~Ataxia-telangiectasia-like disorder,
AIPL1	604393~Cone-rod dystrophy,604393~Leber congenital amaurosis 4,604393~Retinitis pigmentosa, juvenile,
SCN1A	604403~Epilepsy, generalized, with febrile seizures plus, type 2,604403~Febrile seizures, familial, 3A,607208~Dravet syndrome,609634~Migraine, familial hemiplegic, 3,
TTBK2	604432~Spinocerebellar ataxia 11,
TIA1	604454~Welander distal myopathy,
TFG	604484~Hereditary motor and sensory neuropathy, Okinawa type,615658~Spastic paraplegia 57, autosomal recessive,
LCA5	604537~Leber congenital amaurosis 5,
TRPM4	604559~Progressive familial heart block, type IB,
SBF2	604563~Charcot-Marie-Tooth disease, type 4B2,
PAX9	604625~Tooth agenesis, selective, 3,
SLC6A2	604715~Orthostatic intolerance,
CDK5RAP2	604804~Microcephaly 3, primary, autosomal recessive,
UTP4	604901~Cirrhosis, North American Indian childhood type,
CISD2	604928~Wolfram syndrome 2,
H6PD	604931~Cortisone reductase deficiency 1,
NDE1	605013~Microhydranencephaly,614019~Lissencephaly 4 (with microcephaly),
ASXL1	605039~Bohring-Opitz syndrome,614286~Myelodysplastic syndrome, somatic,
PRCC	605074~Renal cell carcinoma, papillary,
KMT2A	605130~Wiedemann-Steiner syndrome,Leukemia, myeloid/lymphoid or mixed-lineage~Leukemia, myeloid/lymphoid or mixed-lineage,
AICDA	605258~Immunodeficiency with hyper-IgM, type 2,
HSPD1	605280~Spastic paraplegia 13, autosomal dominant,612233~Leukodystrophy, hypomyelinating, 4,
CHSY1	605282~Temtamy preaxial brachydactyly syndrome,
PRKCG	605361~Spinocerebellar ataxia 14,
SDHC	605373~Paragangliomas 3,606764~Gastrointestinal stromal tumor,606864~Paraganglioma and gastric stromal sarcoma,
CHMP4B	605387~Cataract 31, multiple types,
APCDD1	605389~Hypotrichosis 1,
HOXA11	605432~Radioulnar synostosis with amegakaryocytic thrombocytopenia 1,
RASA1	605462~Basal cell carcinoma, somatic,608354~Capillary malformation-arteriovenous malformation,608355~Parkes Weber syndrome,
SLC17A8	605583~Deafness, autosomal dominant 25,
MED25	605589~Charcot-Marie-Tooth disease, type 2B2,616449~Basel-Vanagait-Smirin-Yosef syndrome,
IL23R	605606~Psoriasis, protection against,612261~Inflammatory bowel disease 17, protection against,
MYH2	605637~Proximal myopathy and ophthalmoplegia,
DSP	605676~Cardiomyopathy, dilated, with woolly hair and keratoderma,607450~Arrhythmogenic right ventricular dysplasia 8,607655~Skin fragility-woolly hair syndrome,609638~Epidermolysis bullosa, lethal acantholytic,612908~Keratosis palmoplantaris striata II,615821~Dilated cardiomyopathy with woolly hair, keratoderma, and tooth agenesis,
NFU1	605711~Multiple mitochondrial dysfunctions syndrome 1,
SIGMAR1	605726~Spinal muscular atrophy, distal, autosomal recessive, 2,614373~Amyotrophic lateral sclerosis 16, juvenile,
CHRNE	605809~Myasthenic syndrome, congenital, 4A, slow-channel,608931~Myasthenic syndrome, congenital, 4C, associated with acetylcholine receptor deficiency,616324~Myasthenic syndrome, congenital, 4B, fast-channel,
DMGDH	605850~Dimethylglycine dehydrogenase deficiency,
GLDC	605899~Glycine encephalopathy,
PINK1	605909~Parkinson disease 6, early onset,
HMGCS2	605911~HMG-CoA synthase-2 deficiency,
ZNF365	605990~Nephrolithiasis, uric acid, susceptibility to,
TALDO1	606003~Transaldolase deficiency,
PCCA	606054~Propionicacidemia,
PCCB	606054~Propionicacidemia,
MOGS	606056~Congenital disorder of glycosylation, type IIb,
FAM161A	606068~Retinitis pigmentosa 28,
MATR3	606070~Amyotrophic lateral sclerosis 21,
PARK7	606324~Parkinson disease 7, autosomal recessive early-onset,
MYO6	606346~Deafness, autosomal dominant 22,606346~Deafness, autosomal dominant 22, with hypertrophic cardiomyopathy,607821~Deafness, autosomal recessive 37,
TNXB	606408~Ehlers-Danlos syndrome due to tenascin X deficiency,615963~Vesicoureteral reflux 8,
JPH3	606438~Huntington disease-like 2,
ALOXE3	606545~Ichthyosis, congenital, autosomal recessive 3,
NLRP1	606579~Vitiligo-associated multiple autoimmune disease susceptibility 1,615225~Corneal intraepithelial dyskeratosis and ectodermal dysplasia,
HSPB1	606595~Charcot-Marie-Tooth disease, axonal, type 2F,608634~Neuropathy, distal hereditary motor, type IIB,
TSC2	606690~Lymphangioleiomyomatosis, somatic,613254~Tuberous sclerosis-2,
ATP13A2	606693~Ceroid lipofuscinosis, neuronal, 12,606693~Kufor-Rakeb syndrome,
ADCY5	606703~Dyskinesia, familial, with facial myokymia,
CAV1	606721~Partial lipodystrophy, congenital cataracts, and neurodegeneration syndrome,612526~Lipodystrophy, congenital generalized, type 3,615343~Pulmonary hypertension, primary, 3,
GLUD1	606762~Hyperinsulinism-hyperammonemia syndrome,
DNAAF3	606763~Ciliary dyskinesia, primary, 2,
PDGFRA	606764~Gastrointestinal stromal tumor, somatic,607685~Hypereosinophilic syndrome, idiopathic, resistant to imatinib,
SLC26A8	606766~Spermatogenic failure 3,
PDE4D	606799~Stroke, susceptibility to, 1,614613~Acrodysostosis 2, with or without hormone resistance,
SLC5A1	606824~Glucose/galactose malabsorption,
CD40	606843~Immunodeficiency with hyper-IgM, type 3,
ADGRG1	606854~Polymicrogyria, bilateral frontoparietal,615752~Polymicrogyria, bilateral perisylvian,
PALLD	606856~Pancreatic cancer, susceptibility to, 1,
PSEN2	606889~Alzheimer disease-4,613697~Cardiomyopathy, dilated, 1V,
SERPINA1	606963~Pulmonary disease, chronic obstructive, susceptibility to,613490~Emphysema due to AAT deficiency,613490~Emphysema-cirrhosis, due to AAT deficiency,613490~Hemorrhagic diathesis due to \'antithrombin\' Pittsburgh,
HMOX1	606963~Pulmonary disease, chronic obstructive, susceptibility to,614034~Heme oxygenase-1 deficiency,
NPHP4	606966~Nephronophthisis 4,606996~Senior-Loken syndrome 4,
OTOA	607039~Deafness, autosomal recessive 22,
LRRK2	607060~Parkinson disease 8,
WHRN	607084~Deafness, autosomal recessive 31,611383~Usher syndrome, type 2D,
B4GALT1	607091~Congenital disorder of glycosylation, type IId,
MYO3A	607101~Deafness, autosomal recessive 30,
ALG12	607143~Congenital disorder of glycosylation, type Ig,
RNF213	607151~Moyamoya disease 2, susceptibility to,
SMARCE1	607174~Meningioma, familial, susceptibility to,
PDGFB	607174~Meningioma, SIS-related,607907~Dermatofibrosarcoma protuberans,615483~Basal ganglia calcification, idiopathic, 5,
TDP1	607250~Spinocerebellar ataxia, autosomal recessive with axonal neuropathy,
SPG7	607259~Spastic paraplegia 7, autosomal recessive,
SC5D	607330~Lathosterolosis,
CX3CR1	607339~Coronary artery disease, resistance to,609423~Rapid progression to AIDS from HIV1 infection,613784~Macular degeneration, age-related, 12,
KCND3	607346~Spinocerebellar ataxia 19,616399~Brugada syndrome 9,
MRAP	607398~Glucocorticoid deficiency 2,
CRBN	607417~Mental retardation, autosomal recessive 2,
PAFAH1B1	607432~Lissencephaly 1,607432~Subcortical laminar heterotopia,
CCDC50	607453~Deafness, autosomal dominant 44,
CSRP3	607482~Cardiomyopathy, dilated, 1M,612124~Cardiomyopathy, hypertrophic, 12,
CR1	607486~Blood group, Knops system,611162~Malaria, severe, resistance to,CR1 deficiency~CR1 deficiency,SLE susceptibility~SLE susceptibility,
FFAR4	607514~Obesity, susceptibility to,
VRK1	607596~Pontocerebellar hypoplasia type 1A,
ERBB3	607598~Lethal congenital contractural syndrome 2,
RAB27A	607624~Griscelli syndrome, type 2,
NPC2	607625~Niemann-pick disease, type C2,
CLDN1	607626~Ichthyosis, leukocyte vacuoles, alopecia, and sclerosing cholangitis,
IRAK4	607676~IRAK4 deficiency,610799~Invasive pneumococcal disease, recurrent isolated, 1,
GABRG2	607681~Epilepsy, childhood absence, susceptibility to, 2,611277~Epilepsy, generalized, with febrile seizures plus, type 3,611277~Febrile seizures, familial, 8,
CACNB4	607682~Epilepsy, idiopathic generalized, susceptibility to, 9,607682~Epilepsy, juvenile myoclonic, susceptibility to, 6,613855~Episodic ataxia, type 5,
GIGYF2	607688~Parkinson disease 11,
POLR3A	607694~Leukodystrophy, hypomyelinating, 7, with or without oligodontia and/or hypogonadotropic hypogonadism,
SHOC2	607721~Noonan-like syndrome with loose anagen hair,
SCN2A	607745~Seizures, benign familial infantile, 3,613721~Epileptic encephalopathy, early infantile, 11,
TJP2	607748~Hypercholanemia, familial,615878~Cholestasis, progressive familial intrahepatic 4,
MLLT11	607785~Leukemia, acute myelomonocytic, somatic,
ARHGAP26	607785~Leukemia, juvenile myelomonocytic, somatic,
SEC23A	607812~Craniolenticulosutural dysplasia,
JPH1	607831~Charcot-Marie-Tooth disease, axonal, autosomal dominant, type 2K,
CD2AP	607832~Glomerulosclerosis, focal segmental, 3,
FOXD3	607836~Autoimmune disease, susceptibility to, 1,
TSHZ1	607842~Aural atresia, congenital,
LAMA2	607855~Muscular dystrophy, congenital merosin-deficient,607855~Muscular dystrophy, congenital, due to partial LAMA2 deficiency,
DSG4	607903~Hypotrichosis 6,
ALG2	607906~Congenital disorder of glycosylation, type Ii,616228~Myasthenic syndrome, congenital, 14, with tubular aggregates,
FSCN2	607921~Retinitis pigmentosa 30,
IRGM	607948~Mycobacterium tuberculosis, protection against,612278~Inflammatory bowel disease 19,
BMPER	608022~Diaphanospondylodysostosis,
PCLO	608027~Pontocerebellar hypoplasia, type 3,
FUS	608030~Amyotrophic lateral sclerosis 6, with or without frontotemporal dementia,614782~Tremor, hereditary essential, 4,
RANBP2	608033~Encephalopathy, acute, infection-induced, 3, susceptibility to,
MSH3	608089~Endometrial carcinoma, somatic,
DPAGT1	608093~Congenital disorder of glycosylation, type Ij,614750~Myasthenic syndrome, congenital, 13, with tubular aggregates,
ARFGEF2	608097~Periventricular heterotopia with microcephaly,
ALG8	608104~Congenital disorder of glycosylation, type Ih,
ZFAT	608175~Autoimmune thyroid disease, susceptibility to, 3,
FBLN1	608180~Synpolydactyly, 3/3'4, associated with metacarpal and metatarsal synostoses,
RPGRIP1	608194~Cone-rod dystrophy 13,613826~Leber congenital amaurosis 6,
BCR	608232~Leukemia, chronic myeloid, somatic,613065~Leukemia, acute lymphocytic, somatic,
AP3B1	608233~Hermansky-Pudlak syndrome 2,
ARHGEF10	608236~Slowed nerve conduction velocity, AD,
HGF	608265~Deafness, autosomal recessive 39,
MEF2A	608320~Coronary artery disease, autosomal dominant, 1,
CERKL	608380~Retinitis pigmentosa 26,
CENPJ	608393~Microcephaly 6, primary, autosomal recessive,613676~Seckel syndrome 4,
CD36	608404~Platelet glycoprotein IV deficiency,610938~Coronary heart disease, susceptibility to, 7,611162~Malaria, cerebral, reduced risk of,611162~Malaria, cerebral, susceptibility to,Macrothrombocytopenia~Macrothrombocytopenia,
RGS9	608415~Bradyopsia,
TNPO3	608423~Muscular dystrophy, limb-girdle, type 1F,
CC2D1A	608443~Mental retardation, autosomal recessive 3,
PSMA6	608446~Myocardial infarcation, susceptibility to,
GCLM	608446~Myocardial infarction, susceptibility to,
MIAT	608446~Myocardial infarction, susceptibility to,
OLR1	608446~Myocardial infarction, susceptibility to,
TNFSF4	608446~Myocardial infarction, susceptibility to,
FKBP5	608516~Major depressive disorder and accelerated response to antidepressant drug treatment,
TPH2	608516~Unipolar depression, susceptibility to,613003~Attention deficit-hyperactivity disorder, susceptibility to, 7,
ALG1	608540~Congenital disorder of glycosylation, type Ik,
NMNAT1	608553~Leber congenital amaurosis 9,
ESRRB	608565~Deafness, autosomal recessive 35,
NPSR1	608584~Asthma, susceptibility to, 2,
RPIA	608611~Ribose 5-phosphate isomerase deficiency,
AHI1	608629~Joubert syndrome-3,
GRHL2	608641~Deafness, autosomal dominant 28,616029~Ectodermal dysplasia/short stature syndrome,
DDC	608643~Aromatic L-amino acid decarboxylase deficiency,
DNAH5	608644~Ciliary dyskinesia, primary, 3, with or without situs inversus,
HYDIN	608647~Ciliary dyskinesia, primary, 5,
SLC27A4	608649~Ichthyosis prematurity syndrome,
NGF	608654~Neuropathy, hereditary sensory and autonomic, type V,
MESP2	608681~Spondylocostal dysostosis 2, autosomal recessive,
ATIC	608688~AICA-ribosiduria due to ATIC deficiency,
ASPM	608716~Microcephaly 5, primary, autosomal recessive,
IGF1	608747~Growth retardation with deafness and mental retardation due to IGF1 deficiency,
MYL2	608758~Cardiomyopathy, hypertrophic, 10,
ALG9	608776~Congenital disorder of glycosylation, type Il,
COG7	608779~Congenital disorder of glycosylation, type IIe,
PDP1	608782~Pyruvate dehydrogenase phosphatase deficiency,
MED13L	608808~Transposition of the great arteries, dextro-looped 1,
GALNT12	608812~Colorectal cancer, susceptibility to, 1,
LARGE1	608840~Muscular dystrophy-dystroglycanopathy (congenital with mental retardation), type B, 6,613154~Muscular dystrophy-dystroglycanopathy (congenital with brain and eye anomalies), type A, 6,
UNC13D	608898~Hemophagocytic lymphohistiocytosis, familial, 3,
KALRN	608901~Coronary heart disease, susceptibility to, 5,
PCYT1A	608940~Spondylometaphyseal dysplasia with cone-rod dystrophy,
CD8A	608957~CD8 deficiency, familial,
PTPRC	608971~Severe combined immunodeficiency, T cell-negative, B-cell/natural killer-cell positive,609532~Hepatitic C virus, susceptibility to,
RNF170	608984~Ataxia, sensory, 1, autosomal dominant,
HADHB	609015~Trifunctional protein deficiency,
HADHA	609015~Trifunctional protein deficiency,609016~Fatty liver, acute, of pregnancy,609016~HELLP syndrome, maternal, of pregnancy,609016~LCHAD deficiency,
CD44	609027~Blood group, Indian system,
FLVCR1	609033~Ataxia, posterior column, with retinitis pigmentosa,
PKP2	609040~Arrhythmogenic right ventricular dysplasia 9,
CDK4	609048~Melanoma, cutaneous malignant, 3,
FANCI	609053~Fanconi anemia, complementation group I,
ST3GAL5	609056~Amish infantile epilepsy syndrome,
GFM1	609060~Combined oxidative phosphorylation deficiency 1,
EGLN1	609070~Hemoglobin, high altitude adaptation,609820~Erythrocytosis, familial, 3,
DIAPH3	609129~Auditory neuropathy, autosomal dominant, 1,
ZEB1	609141~Corneal dystrophy, posterior polymorphous, 3,613270~Corneal dystrophy, Fuchs endothelial, 6,
PDE8B	609161~Striatal degeneration, autosomal dominant,614190~Pigmented nodular adrenocortical disease, primary, 3,
SLC38A8	609218~Foveal hypoplasia 2, with or without optic nerve misrouting and/or anterior segment dysgenesis,
PLOD2	609220~Bruck syndrome 2,
IQCB1	609254~Senior-Loken syndrome 5,
EEF2	609306~Spinocerebellar ataxia 26,
FGF14	609307~Spinocerebellar ataxia 27,
FGD4	609311~Charcot-Marie-Tooth disease, type 4H,
AP1S1	609313~MEDNIK syndrome,
DDHD1	609340~Spastic paraplegia 28, autosomal recessive,
STOX1	609404~Preeclampsia/eclampsia 4,
KIR3DL1	609423~AIDS, delayed/rapid progression to,
CXCR1	609423~AIDS, slow progression to,
TLR3	609423~HIV1 infection, resistance to,Herpes simplex encephalitis, susceptibility to, 2 613002~Herpes simplex encephalitis, susceptibility to, 2 613002,
KCNMA1	609446~Generalized epilepsy and paroxysmal dyskinesia,
FLNC	609524~Myopathy, myofibrillar, 5,614065~Myopathy, distal, 4,
SNAP29	609528~Cerebral dysgenesis, neuropathy, ichthyosis, and palmoplantar keratoderma syndrome,
CYP2C19	609535~Clopidogrel, impaired responsiveness to,609535~Mephenytoin poor metabolizer,609535~Omeprazole poor metabolizer,609535~Proguanil poor metabolizer,
C5	609536~C5 deficiency,615749~Eculizumab, poor response to,
TK2	609560~Mitochondrial DNA depletion syndrome 2 (myopathic type),
ALX4	609597~Parietal foramina 2,613451~Frontonasal dysplasia 2,615529~Craniosynostosis 5, susceptibility to,
KCNH2	609620~Short QT syndrome 1,613688~Long QT syndrome 2,613688~Long QT syndrome 2, acquired, susceptibility to,
LPIN2	609628~Majeed syndrome,
ILDR1	609646~Deafness, autosomal recessive 42,
SECISBP2	609698~Thyroid hormone metabolism, abnormal,
CRYBB3	609741~Cataract 22, autosomal recessive,
MYO9B	609753~Celiac disease, susceptibility to, 4,
TGM5	609796~Peeling skin syndrome 2,
LFNG	609813~Spondylocostal dysostosis 3, autosomal recessive,
P2RX1	609821~Bleeding disorder due to P2RX1 defect, somatic,
P2RY12	609821~Bleeding disorder, platelet-type, 8,
TRIOBP	609823~Deafness, autosomal recessive 28,
WDR36	609887~Glaucoma 1, open angle, G,
PLN	609909~Cardiomyopathy, dilated, 1P,613874~Cardiomyopathy, hypertrophic, 18,
ITGAM	609939~Systemic lupus erythematous, association with susceptibility to, 6,
GLUL	610015~Glutamine deficiency, congenital,
PDE6H	610024~Achromatopsia 6,610024~Retinal cone dystrophy 3,
CNTNAP2	610042~Cortical dysplasia-focal epilepsy syndrome,610042~Pitt-Hopkins like syndrome 1,612100~Autism susceptibility 15,
DCN	610048~Corneal dystrophy, congenital stromal,
VSX2	610092~Microphthalmia with coloboma 3,610093~Microphthalmia, isolated 2,
DCAF8	610100~Giant axonal neuropathy 2, autosomal dominant,
C7	610102~C7 deficiency,
POLG2	610131~Progressive external ophthalmoplegia with mitochondrial DNA deletions, autosomal dominant 4,
MARVELD2	610153~Deafness, autosomal recessive 49,
ADCY1	610154~Deafness, autosomal recessive 44,
CD247	610163~Immunodeficiency 25,
RNASEH2B	610181~Aicardi-Goutieres syndrome 2,
CEP290	610188~Joubert syndrome 5,610189~Senior-Loken syndrome 6,611134~Meckel syndrome 4,611755~Leber congenital amaurosis 10,615991~Bardet-Biedl syndrome 14,
DSG2	610193~Arrhythmogenic right ventricular dysplasia 10,612877~Cardiomyopathy, dilated, 1BB,
GLIS3	610199~Diabetes mellitus, neonatal, with congenital hypothyroidism,
DCDC2	610212~Deafness, autosomal recessive 66,616217~Nephronophthisis 19,
ZNF750	610227~Seborrhea-like dermatitis with psoriasiform elements,
REEP1	610250~Spastic paraplegia 31, autosomal dominant,614751~Neuronopathy, distal hereditary motor, type VB,
ALDH2	610251~Alcohol sensitivity, acute,610251~Hangover, susceptibility to,Esophageal cancer, alcohol-related, susceptibility to~Esophageal cancer, alcohol-related, susceptibility to,Sublingual nitroglycerin, susceptibility to poor response to~Sublingual nitroglycerin, susceptibility to poor response to,
EHMT1	610253~Kleefstra syndrome,
LHFPL5	610265~Deafness, autosomal recessive 67,
SEMA4A	610282~Retinitis pigmentosa 35,610283~Cone-rod dystrophy 10,
PIGM	610293~Glycosylphosphatidylinositol deficiency,
CLCF1	610313~Cold-induced sweating syndrome 2,
RNASEH2C	610329~Aicardi-Goutieres syndrome 3,
KIF1A	610357~Spastic paraplegia 30, autosomal recessive,614213~Neuropathy, hereditary sensory, type IIC,614255~Mental retardation, autosomal dominant 9,
IFNAR2	610424~Hepatitis B virus, susceptibility to,616669~Immunodeficiency 45,
KANSL1	610443~Koolen-De Vries syndrome,
TPMT	610460~6-mercaptopurine sensitivity,
PDE11A	610475~Pigmented nodular adrenocortical disease, primary, 2,
DSC2	610476~Arrhythmogenic right ventricular dysplasia 11,610476~Arrhythmogenic right ventricular dysplasia 11 with mild palmoplantar keratoderma and woolly hair,
CACNA2D4	610478~Retinal cone dystrophy 4,
TSFM	610505~Combined oxidative phosphorylation deficiency 3,
FAM126A	610532~Leukodystrophy, hypomyelinating, 5,
GFPT1	610542~Myasthenia, congenital, 12, with tubular aggregates,
PROK2	610628~Hypogonadotropic hypogonadism 4 with or without anosmia,
RPS24	610629~Diamond-blackfan anemia 3,
ERCC3	610651~Xeroderma pigmentosum, group B,616390~Trichothiodystrophy 2, photosensitive,
PLCE1	610725~Nephrotic syndrome, type 3,
HAX1	610738~Neutropenia, severe congenital 3, autosomal recessive,
SYNE1	610743~Spinocerebellar ataxia, autosomal recessive 8,612998~Emery-Dreifuss muscular dystrophy 4, autosomal dominant,
CDKN1B	610755~Multiple endocrine neoplasia, type IV,
ERCC1	610758~Cerebrooculofacioskeletal syndrome 4,
SMC3	610759~Cornelia de Lange syndrome 3,
SCARB1	610762~High density lipoprotein cholesterol level QTL6,
SLC25A3	610773~Mitochondrial phosphate carrier deficiency,
DSTYK	610805~Congenital anomalies of kidney and urinary tract, susceptibility to,
GLI2	610829~Holoprosencephaly-9,615849~Culler-Jones syndrome,
NME8	610852~Ciliary dyskinesia, primary, 6,
ROBO2	610878~Vesicoureteral reflux 2,
P3H1	610915~Osteogenesis imperfecta, type VIII,
ABCA3	610921~Surfactant metabolism dysfunction, pulmonary, 3,
CR2	610927~Systemic lupus erythematosus, susceptibility to, 9,614699~Immunodeficiency, common variable, 7,
LRP6	610947~Coronary artery disease, autosomal dominant, 2,616724~Tooth agenesis, selective, 7,
MFSD8	610951~Ceroid lipofuscinosis, neuronal, 7,616170~Macular dystrophy with central cone involvement,
TCF4	610954~Pitt-Hopkins syndrome,613267~Corneal dystrophy, Fuchs endothelial, 3,
CFI	610984~Complement factor I deficiency,612923~Hemolytic uremic syndrome, atypical, susceptibility to, 3,615439~Macular degeneration, age-related, 13, susceptibility to,
PSAT1	610992~Phosphoserine aminotransferase deficiency,616038~Neu-Laxova syndrome 2,
RDX	611022~Deafness, autosomal recessive 24,
IRAK3	611064~Asthma susceptibility 5,
ATG16L1	611081~Inflammatory bowel disease 10,
STRADA	611087~Polyhydramnios, megalencephaly, and symptomatic epilepsy,
ST3GAL3	611090~Mental retardation, autosomal recessive 12,615006~Epileptic encephalopathy, early infantile, 15,
NSUN2	611091~Mental retardation, autosomal recessive 5,
GRIK2	611092~Mental retardation, autosomal recessive, 6,
TUSC3	611093~Mental retardation, autosomal recessive 7,
DARS2	611105~Leukoencephalopathy with brain stem and spinal cord involvement and lactate elevation,
ACAD9	611126~Mitochondrial complex I deficiency due to ACAD9 deficiency,
GABRA1	611136~Epilepsy, childhood absence, susceptibility to, 4,611136~Epilepsy, juvenile myoclonic, susceptibility to, 5,615744~Epileptic encephalopathy, early infantile, 19,
ICAM1	611162~Malaria, cerebral, susceptibility to,
GYPC	611162~Malaria, resistance to,616089~Blood group, Gerbich,
GYPA	611162~Malaria, resistance to,Blood group, MN~Blood group, MN,
COG1	611209~Congenital disorder of glycosylation, type IIg,
ERLIN2	611225~Spastic paraplegia 18, autosomal recessive,
IFT80	611263~Short-rib thoracic dysplasia 2 with or without polydactyly,
ACAD8	611283~Isobutyryl-CoA dehydrogenase deficiency,
NHEJ1	611291~Severe combined immunodeficiency with microcephaly, growth retardation, and sensitivity to ionizing radiation,
KIF1C	611302~Spastic ataxia 2, autosomal recessive,
TBX20	611363~Atrial septal defect 4,
PIP5K1C	611369~Lethal congenital contractural syndrome 3,
C3	611378~Macular degeneration, age-related, 9,612925~Hemolytic uremic syndrome, atypical, susceptibility to, 5,613779~C3 deficiency,
BFSP1	611391~Cataract 33,
VCL	611407~Cardiomyopathy, dilated, 1W,613255~Cardiomyopathy, hypertrophic, 15,
SPRED1	611431~Legius syndrome,
LRTOMT	611451~Deafness, autosomal recessive 63,
KCNE2	611493~Atrial fibrillation, familial, 4,613693~Long QT syndrome 6,
TYK2	611521~Immunodeficiency 35,
RARS2	611523~Pontocerebellar hypoplasia, type 6,
CRYBB1	611544~Cataract 17, multiple types,
RAF1	611553~Noonan syndrome 5,611554~LEOPARD syndrome 2,615916~Cardiomyopathy, dilated, 1NN,
BFSP2	611597~Cataract 12, multiple types,
TUBA1A	611603~Lissencephaly 3,
EGF	611718~Hypomagnesemia 4, renal,
MRPS22	611719~Combined oxidative phosphorylation deficiency 5,
IRF4	611724~Skin/hair/eye pigmentation, variation in, 8,
KCTD7	611726~Epilepsy, progressive myoclonic 3, with or without intracellular inclusions,
ASIP	611742~Skin/hair/eye pigmentation 9, brown/nonbrown eyes,611742~Skin/hair/eye pigmentation 9, dark/light hair,
NLRP12	611762~Familial cold autoinflammatory syndrome 2,
ITPKC	611775~Kawasaki disease, susceptibility to,
GPD1L	611777~Brugada syndrome 2,
EPAS1	611783~Erythrocytosis, familial, 4,
ACTA2	611788~Aortic aneurysm, familial thoracic 6,613834~Multisystemic smooth muscle dysfunction syndrome,614042~Moyamoya disease 5,
EPB41	611804~Elliptocytosis-1,
AKAP9	611820~Long QT syndrome-11,
EHBP1	611868~Prostate cancer, hereditary, 12,
CACNB2	611876~Brugada syndrome 4,
DNAH11	611884~Ciliary dyskinesia, primary, 7, with or without situs inversus,
ANG	611895~Amyotrophic lateral sclerosis 9,
MSMB	611928~Prostate cancer, hereditary, 13,
CASQ2	611938~Ventricular tachycardia, catecholaminergic polymorphic, 2,
CACNA1H	611942~Epilepsy, childhood absence, susceptibility to, 6,611942~Epilepsy, idiopathic generalized, susceptibility to, 6,
RNF168	611943~RIDDLE syndrome,
CYCS	612004~Thrombocytopenia 4,
RFT1	612015~Congenital disorder of glycosylation, type In,
COQ8A	612016~Coenzyme Q10 deficiency, primary, 4,
SLC16A12	612018~Cataract, juvenile, with microcornea and glucosuria,
RNF212	612042~Recombination rate QTL 1,
CHRNA3	612052~Lung cancer susceptibility 2,
CHRNA5	612052~Lung cancer susceptibility 2,612052~Nicotine dependence, susceptibility to,
PRKRA	612067~Dystonia 16,
SUCLA2	612073~Mitochondrial DNA depletion syndrome 5 (encephalomyopathic with or without methylmalonic aciduria),
SLC2A9	612076~Hypouricemia, renal, 2,612076~Uric acid concentration, serum, QTL 2,
RBM28	612079~Alopecia, neurologic defects, and endocrinopathy syndrome,
ACTN2	612158~Cardiomyopathy, dilated, 1AA, with or without LVNC,612158~Cardiomyopathy, hypertrophic, 23, with or without LVNC,
CREB1	612160~Histiocytoma, angiomatoid fibrous, somatic,
STXBP1	612164~Epileptic encephalopathy, early infantile, 4,
CTC1	612199~Cerebroretinal microangiopathy with calcifications and cysts,
EWSR1	612219~Ewing sarcoma,612219~Neuroepithelioma,
SMAD7	612229~Colorectal cancer, susceptibility to, 3,
NR4A3	612237~Chondrosarcoma, extraskeletal myxoid,
TAF15	612237~Chondrosarcoma, extraskeletal myxoid,
STAT4	612253~Systemic lupus erythematosus, susceptibility to, 11,
GABRB3	612269~Epilepsy, childhood absence, susceptibility to, 5,
ARL13B	612291~Joubert syndrome 8,
CD59	612300~Hemolytic anemia, CD59-mediated, with or without immune-mediated polyneuropathy,
FIGLA	612310~Premature ovarian failure 6,
SATB2	612313~Glass syndrome,
PROS1	612336~Thrombophilia due to protein S deficiency, autosomal dominant,614514~Thrombophilia due to protein S deficiency, autosomal recessive,
ZBTB18	612337~Mental retardation, autosomal dominant 22,
KCNE1	612347~Jervell and Lange-Nielsen syndrome 2,613695~Long QT syndrome 5,
PLAT	612348~Hyperfibrinolysis, familial, due to increased release of PLAT,612348~Thrombophilia, familial, due to decreased release of PLAT,
SERPIND1	612356~Thrombophilia due to heparin cofactor II deficiency,
XBP1	612371~Major affective disorder-7, susceptibility to,
RARA	612376~Leukemia, acute promyelocytic,
NUMA1	612376~Leukemia, acute promyelocytic, somatic,
SRD5A3	612379~Congenital disorder of glycosylation, type Iq,612713~Kahrizi syndrome,
TSEN2	612389~Pontocerebellar hypoplasia type 2B,
F11	612416~Factor XI deficiency, autosomal dominant,612416~Factor XI deficiency, autosomal recessive,
KLKB1	612423~Fletcher factor (prekallikrein) deficiency,
PRICKLE1	612437~Epilepsy, progressive myoclonic 1B,
DNAI2	612444~Ciliary dyskinesia, primary, 9, with or without situs inversus,
C6	612446~C6 deficiency,Combined C6/C7 deficiency~Combined C6/C7 deficiency,
ZBTB16	612447~Skeletal defects, genital hypoplasia, and mental retardation,Leukemia, acute promyelocytic, PL2F/RARA type~Leukemia, acute promyelocytic, PL2F/RARA type,
FTO	612460~Obesity, susceptibility to, BMIQ14,612938~Growth retardation, developmental delay, facial dysmorphism,
DNAAF2	612518~Ciliary dyskinesia, primary, 10,
MMP20	612529~Amelogenesis imperfecta, type IIA2,
SLC33A1	612539~Spastic paraplegia 42, autosomal dominant,614482~Congenital cataracts, hearing loss, and neurodegeneration,
CNTN1	612540~Myopathy, congenital, Compton-North,
APOL1	612551~End-stage renal disease, nondiabetic, susceptibility to,612551~Glomerulosclerosis, focal segmental, 4, susceptibility to,
ADIPOQ	612556~Adiponectin deficiency,
UGT2B17	612560~Bone mineral density QTL 12, osteoporosis,
KIRREL3	612581~Mental retardation, autosomal dominant 4,
POLD1	612591~Colorectal cancer, susceptibility to, 10,615381~Mandibular hypoplasia, deafness, progeroid features, and lipodystrophy syndrome,
EPO	612623~Microvascular complications of diabetes 2,
SOD2	612634~Microvascular complications of diabetes 6,
RSPH4A	612649~Ciliary dyskinesia, primary, 11,
SLC1A3	612656~Episodic ataxia, type 6,
SLC17A3	612671~Gout susceptibility 4,612671~Uric acid concentration, serum, QTL4,
ABHD12	612674~Polyneuropathy, hearing loss, ataxia, retinitis pigmentosa, and cataract,
FGF8	612702~Hypogonadotropic hypogonadism 6 with or without anosmia,
STIL	612703~Microcephaly 7, primary, autosomal recessive,
RDH12	612712~Leber congenital amaurosis 13,
COX4I2	612714~Exocrine pancreatic insufficiency, dyserythropoietic anemia, and calvarial hyperostosis,
ADAM9	612775~Cone-rod dystrophy 9,
GHRHR	612781~Growth hormone deficiency, isolated, type IB,
PAPSS2	612847~Brachyolmia 4 with mild epiphyseal and metaphyseal changes,
AMPD3	612874~AMP deaminase deficiency, erythrocytic,
MCM8	612885~Premature ovarian failure 10,
KANK1	612900~Cerebral palsy, spastic quadriplegic, 2,
CD46	612922~Hemolytic uremic syndrome, atypical, susceptibility to, 2,
LDHA	612933~Glycogen storage disease XI,
KLHL7	612943~Retinitis pigmentosa 42,
SLC25A12	612949~Hypomyelination, global cerebral,
RNASET2	612951~Leukoencephalopathy, cystic, without megalencephaly,
SAMHD1	612952~Aicardi-Goutieres syndrome 5,614415~Chilblain lupus 2,
SNTA1	612955~Long QT syndrome 12,
DPP6	612956~Ventricular fibrillation, paroxysmal familial, 2,616311~Mental retardation, autosomal dominant 33,
FGF9	612961~Multiple synostoses syndrome 3,
SYNE2	612999~Emery-Dreifuss muscular dystrophy 5, autosomal dominant,
ITK	613011~Lymphoproliferative syndrome 1,
ALK	613014~Neuroblastoma, susceptibility to, 3,
PHKG2	613027~Glycogen storage disease IXc,Cirrhosis due to liver phosphorylase kinase deficiency~Cirrhosis due to liver phosphorylase kinase deficiency,
POU1F1	613038~Pituitary hormone deficiency, combined, 1,
MMP9	613073~Metaphyseal anadysplasia 2,
RIN2	613075~Macrocephaly, alopecia, cutis laxa, and scoliosis,
RAD50	613078~Nijmegen breakage syndrome-like disorder,
LOXHD1	613079~Deafness, autosomal recessive 77,
TLL1	613087~Atrial septal defect 6,
DYNC2H1	613091~Short-rib thoracic dysplasia 3 with or without polydactyly,
PDE6C	613093~Cone dystrophy 4,
PKD2	613095~Polycystic kidney disease 2,
DSC3	613102~Hypotrichosis and recurrent skin vesicles,
CLEC7A	613108~Candidiasis, familial, 4, autosomal recessive,614079~Aspergillosis, susceptibility to,
SERPINC1	613118~Thrombophilia due to antithrombin III deficiency,
KCNE3	613119~Brugada syndrome 6,
NEXN	613122~Cardiomyopathy, dilated, 1CC,613876~Cardiomyopathy, hypertrophic, 20,
POMT2	613150~Muscular dystrophy-dystroglycanopathy (congenital with brain and eye anomalies), type A, 2,613156~Muscular dystrophy-dystroglycanopathy (congenital with mental retardation), type B, 2,613158~Muscular dystrophy-dystroglycanopathy (limb-girdle), type C, 2,
XPNPEP3	613159~Nephronophthisis-like nephropathy 1,
UPB1	613161~Beta-ureidopropionase deficiency,
NT5C2	613162~Spastic paraplegia 45, autosomal recessive,
ABAT	613163~GABA-transaminase deficiency,
RBM20	613172~Cardiomyopathy, dilated, 1DD,
LTBP4	613177~Cutis laxa, autosomal recessive, type IC,
TRAPPC9	613192~Mental retardation, autosomal recessive 13,
DNAAF1	613193~Ciliary dyskinesia, primary, 13,
ADAMTS17	613195~Weill-Marchesani-like syndrome,
ITGA7	613204~Muscular dystrophy, congenital, due to ITGA7 deficiency,
WDR72	613211~Amelogenesis imperfecta, type IIA3,
TRPM1	613216~Night blindness, congenital stationary (complete), 1C, autosomal recessive,
EPCAM	613217~Diarrhea 5, with tufting enteropathy, congenital,613244~Colorectal cancer, hereditary nonpolyposis, type 8,
TLR1	613223~Leprosy, protection against,613223~Leprosy, susceptibility to, 5,
CA8	613227~Cerebellar ataxia and mental retardation with or without quadrupedal locomotion 3,
MYH6	613251~Cardiomyopathy, hypertrophic, 14,613252~Cardiomyopathy, dilated, 1EE,614089~Atrial septal defect 3,614090~Sick sinus syndrome 3,
SLC30A10	613280~Hypermanganesemia with dystonia, polycythemia, and cirrhosis,
GRXCR1	613285~Deafness, autosomal recessive 25,
SLC10A2	613291~Bile acid malabsorption, primary,
TSPAN12	613310~Exudative vitreoretinopathy 5,
SMARCA4	613325~Rhabdoid tumor predisposition syndrome 2,614609~Mental retardation, autosomal dominant 16,
LRAT	613341~Leber congenital amaurosis 14,613341~Retinal dystrophy, early-onset severe,613341~Retinitis pigmentosa, juvenile,
BLK	613375~Maturity-onset diabetes of the young, type 11,
PTHLH	613382~Brachydactyly, type E2,Humoral hypercalcemia of malignancy~Humoral hypercalcemia of malignancy,
ITCH	613385~Autoimmune disease, multisystem, with facial dysmorphism,
RAD51C	613390~Fanconi anemia, complementation group O,613399~Breast-ovarian cancer, familial, susceptibility to, 3,
PTPRQ	613391~Deafness, autosomal recessive 84A,
DDX11	613398~Warsaw breakage syndrome,
PNKP	613402~Microcephaly, seizures, and developmental delay,616267~Ataxia-oculomotor apraxia 4,
VIPAS39	613404~Arthrogryposis, renal dysfunction, and cholestasis 2,
SLC9A9	613410~Autism susceptibility 16,
SHANK2	613436~Autism susceptibility 17,
MEF2C	613443~Chromosome 5q14.3 deletion syndrome,613443~Mental retardation, stereotypic movements, epilepsy, and/or cerebral malformations,
SERPINB6	613453~Deafness, autosomal recessive 91,
ALX1	613456~Frontonasal dysplasia 3,
GCKR	613463~Fasting plasma glucose level QTL 5,
TTC8	613464~Retinitis pigmentosa 51,615985~Bardet-Biedl syndrome 8,
GPI	613470~Hemolytic anemia, nonspherocytic, due to glucose phosphate isomerase deficiency,
SPTAN1	613477~Epileptic encephalopathy, early infantile, 5,
COG4	613489~Congenital disorder of glycosylation, type IIj,
MS4A1	613495~Immunodeficiency, common variable, 5,
BLNK	613502~Agammaglobulinemia 4,
LRRC8A	613506~Agammaglobulinemia 5,
GYG1	613507~Glycogen storage disease XV,616199~Polyglucosan body myopathy 2,
SIAE	613551~Autoimmune disease, susceptibility to, 6,
C12ORF65	613559~Combined oxidative phosphorylation deficiency 7,615035~Spastic paraplegia 55, autosomal recessive,
YARS2	613561~Myopathy, lactic acidosis, and sideroblastic anemia 2,
CBL	613563~Noonan syndrome-like disorder with or without juvenile myelomonocytic leukemia,
NECTIN4	613573~Ectodermal dysplasia-syndactyly syndrome 1,
IMPG2	613581~Retinitis pigmentosa 56,616152~Macular dystrophy, vitelliform, 5,
RP1L1	613587~Occult macular dystrophy,
SORT1	613589~Low density lipoprotein cholesterol level QTL6,
WDR35	613610~Cranioectodermal dysplasia 2,614091~Short-rib thoracic dysplasia 7 with or without polydactyly,
PTPN14	613611~Choanal atresia and lymphedema,
COG5	613612~Congenital disorder of glycosylation, type IIi,
SDCCAG8	613615~Senior-Loken syndrome 7,615993~Bardet-Biedl syndrome 16,
HOGA1	613616~Hyperoxaluria, primary, type III,
CHUK	613630~Cocoon syndrome,
SPTLC2	613640~Neuropathy, hereditary sensory and autonomic, type IC,
AP5Z1	613647~Spastic paraplegia 48, autosomal recessive,
C1QA	613652~C1q deficiency,
IDH2	613657~D-2-hydroxyglutaric aciduria 2,
ALG11	613661~Congenital disorder of glycosylation, type Ip,
MED17	613668~Microcephaly, postnatal progressive, with seizures and brain atrophy,
FOXP1	613670~Mental retardation with language impairment and with or without autistic features,
SOBP	613671~Mental retardation, anterior maxillary protrusion, and strabismus,
MTPAP	613672~Ataxia, spastic, 4,
THOC6	613680~Beaulieu-Boycott-Innes syndrome,
SUMO1	613705~Orofacial cleft 10,
POLR1D	613717~Treacher Collins syndrome 2,
MSRB3	613718~Deafness, autosomal recessive 74,
PLCB1	613722~Epileptic encephalopathy, early infantile, 12,
SCP2	613724~Leukoencephalopathy with dystonia and motor neuropathy,
ANO10	613728~Spinocerebellar ataxia, autosomal recessive 10,
TMPO	613740~Cardiomyopathy, dilated, 1T,
CYP11A1	613743~Adrenal insufficiency, congenital, with 46XY sex reversal, partial or complete,
AP4E1	613744~Spastic paraplegia 51, autosomal recessive,
NRL	613750~Retinitis pigmentosa 27,Retinal degeneration, autosomal recessive, clumped pigment type~Retinal degeneration, autosomal recessive, clumped pigment type,
AHCY	613752~Hypermethioninemia with deficiency of S-adenosylhomocysteine hydrolase,
CNGA1	613756~Retinitis pigmentosa 49,
FADD	613759~Infections, recurrent, with encephalopathy, hepatic dysfunction, and cardiovasuclar malformations,
MAP3K1	613762~46XY sex reversal 6,
CNGB1	613767~Retinitis pigmentosa 45,
MYLK	613780~Aortic aneurysm, familial thoracic 7,
C1S	613783~C1s deficiency,
C8B	613789~C8 deficiency, type II,
C8A	613790~C8 deficiency, type I,
CD55	613793~Blood group Cromer,
SMAD3	613795~Loeys-Dietz syndrome 3,
STAT1	613796~Immunodeficiency 31B, mycobacterial and viral infections, autosomal recessive,614162~Immunodeficiency 31C, autosomal dominant,614892~Immunodeficiency 31A, mycobacteriosis, autosomal dominant,
ORC4	613800~Meier-Gorlin syndrome 2,
ORC6	613803~Meier-Gorlin syndrome 3,
CCDC39	613807~Ciliary dyskinesia, primary, 14,
CCDC40	613808~Ciliary dyskinesia, primary, 15,
PDE6A	613810~Retinitis pigmentosa 43,
SEPSECS	613811~Pontocerebellar hypoplasia type 2D,
TTC21B	613819~Short-rib thoracic dysplasia 4 with or without polydactyly,613820~Nephronophthisis 12,
CEP152	613823~Seckel syndrome 5,614852~Microcephaly 9, primary, autosomal recessive,
NEK8	613824~Nephronophthisis 9,615415~Renal-hepatic-pancreatic dysplasia 2,
C9	613825~C9 deficiency,615591~Macular degeneration, age-related, 15, susceptibility to,
SLC24A1	613830~Night blindness, congenital stationary (complete), 1D, autosomal recessive,
PRICKLE2	613832~Epilepsy, progressive myoclonic 5,
MYOZ2	613838~Cardiomyopathy, hypertrophic, 16,
DHFR	613839~Megaloblastic anemia due to dihydrofolate reductase deficiency,
SARS2	613845~Hyperuricemia, pulmonary hypertension, renal failure, and alkalosis,
SP7	613849~Osteogenesis imperfecta, type XII,
ITPA	613850~Inosine triphosphatase deficiency,616647~Epileptic encephalopathy, early infantile, 35,
FUT6	613852~Fucosyltransferase 6 deficiency,
GNAT2	613856~Achromatopsia-4,
FCN3	613860~Immunodeficiency due to ficolin 3 deficiency,
DHDDS	613861~Retinitis pigmentosa 59,
MERTK	613862~Retinitis pigmentosa 38,
SLC26A5	613865~Deafness, autosomal recessive 61,
JPH2	613873~Cardiomyopathy, hypertrophic, 17,
CALR3	613875~Cardiomyopathy, hypertrophic, 19,
CNNM2	613882~Hypomagnesemia 6, renal,616418~Hypomagnesemia, seizures, and mental retardation,
TCTN2	613885~Meckel syndrome 8,616654~Joubert syndrome 24,
NTRK2	613886~Obesity, hyperphagia, and developmental delay,
TDRD7	613887~Cataract 36,
TGM6	613908~Spinocerebellar ataxia 35,
HEPACAM	613925~Megalencephalic leukoencephalopathy with subcortical cysts 2A,613926~Megalencephalic leukoencephalopathy with subcortical cysts 2B, remitting, with or without mental retardation,
ACACA	613933~Acetyl-CoA carboxylase deficiency,
SLX4	613951~Fanconi anemia, complementation group P,
IL17RA	613953~Candidiasis, familial, 5, autosomal recessive,
IL31RA	613955~Amyloidosis, primary localized cutaneous, 2,
IL17F	613956~Candidiasis, familial, 6, autosomal dominant,
DPY19L2	613958~Spermatogenic failure 9,
GRIN2B	613970~Mental retardation, autosomal dominant 6,616139~Epileptic encephalopathy, early infantile, 27,
SERPINF1	613982~Osteogenesis imperfecta, type VI,
PRPF6	613983~Retinitis pigmentosa 60,
WRAP53	613988~Dyskeratosis congenita, autosomal recessive 3,
DNAL1	614017~Ciliary dyskinesia, primary, 16,
GOSR2	614018~Epilepsy, progressive myoclonic 6,
TECR	614020~Mental retardation, autosomal recessive 14,
PSPH	614023~Phosphoserine phosphatase deficiency,
CLDN14	614035~Deafness, autosomal recessive 29,
TMEM70	614052~Mitochondrial complex V (ATP synthase) deficiency, nuclear type 2,
AP4S1	614067~Spastic paraplegia 52, autosomal recessive,
ZBTB24	614069~Immunodeficiency-centromeric instability-facial anomalies syndrome-2,
HPS3	614072~Hermansky-Pudlak syndrome 3,
HPS4	614073~Hermansky-Pudlak syndrome 4,
HPS5	614074~Hermansky-Pudlak syndrome 5,
BLOC1S3	614077~Hermansky-Pudlak syndrome 8,
PIGN	614080~Multiple congenital anomalies-hypotonia-seizures syndrome 1,
FANCL	614083~Fanconi anemia, complementation group L,
CAT	614097~Acatalasemia,
KCNJ6	614098~Keppen-Lubinsky syndrome,
IFT43	614099~Cranioectodermal dysplasia 3,
DYRK1A	614104~Mental retardation, autosomal dominant 7,
ALDH6A1	614105~Methylmalonate semialdehyde dehydrogenase deficiency,
CEP57	614114~Mosaic variegated aneuploidy syndrome 2,
LAMC3	614115~Cortical malformations, occipital,
CHIT1	614122~Chitotriosidase deficiency,
LDHB	614128~Lactate dehydrogenase-B deficiency,
MYO1E	614131~Glomerulosclerosis, focal segmental, 6,
COL9A1	614134~Stickler syndrome, type IV,614135~Epiphyseal dysplasia, multiple, 6,
DIABLO	614152~Deafness, autosomal dominant 64,
BLVRA	614156~Hyperbiliverdinemia,
FZD6	614157~Nail disorder, nonsyndromic congenital, 10, (claw-shaped nails),
MSTN	614160~Muscle hypertrophy,
ZNF644	614167~Myopia 21, autosomal dominant,
PRDM5	614170~Brittle cornea syndrome 2,
BLOC1S6	614171~Hermansky-pudlak syndrome 9,
TCTN1	614173~Joubert syndrome 13,
MAK	614181~Retinitis pigmentosa 62,
PTPRO	614196~Nephrotic syndrome, type 6,
ITGA2	614200~Glycoprotein Ia deficiency,
GP6	614201~Bleeding disorder, platelet-type, 11,
MAN1B1	614202~Mental retardation, autosomal recessive 15,
VPS35	614203~Parkinson disease 17,
PGAP2	614207~Hyperphosphatasia with mental retardation syndrome 3,
DOCK6	614219~Adams-Oliver syndrome 2,
RAB18	614222~Warburg micro syndrome 3,
IGFBP7	614224~Retinal arterial macroaneurysm with supravalvular pulmonic stenosis,
CDON	614226~Holoprosencephaly 11,
SYT14	614229~Spinocerebellar ataxia, autosomal recessive 11,
IER3IP1	614231~Microcephaly, epilepsy, and diabetes syndrome,
MED23	614249~Mental retardation, autosomal recessive 18,
MOG	614250~Narcolepsy 7,
EIF4G1	614251~Parkinson disease 18,
GRIN1	614254~Mental retardation, autosomal dominant 8,
CACNG2	614256~Mental retardation, autosomal dominant 10,
EPB41L1	614257~Mental retardation, autosomal dominant 11,
STAMBP	614261~Microcephaly-capillary malformation syndrome,
ACSF3	614265~Combined malonic and methylmalonic aciduria,
ASCC1	614266~Barrett esophagus/esophageal adenocarcinoma,
CTHRC1	614266~Barrett esophagus/esophageal adenocarcinoma,
AKR1C4	614279~46XY sex reversal 8, modifier of,
AKR1C2	614279~46XY sex reversal 8,Obesity, hyperphagia, and developmental delay~Obesity, hyperphagia, and developmental delay,
SF3B1	614286~Myelodysplastic syndrome, somatic,
TET2	614286~Myelodysplastic syndrome, somatic,
RAD51D	614291~Breast-ovarian cancer, familial, susceptibility to, 4,
P3H2	614292~Myopia, high, with cataract and vitreoretinal degeneration,
C19ORF12	614298~Neurodegeneration with brain iron accumulation 4,615043~Spastic paraplegia 43, autosomal recessive,
BOLA3	614299~Multiple mitochondrial dysfunctions syndrome 2,
ADK	614300~Hypermethioninemia due to adenosine kinase deficiency,
SCN8A	614306~Cognitive impairment with or without cerebellar ataxia,614558~Epileptic encephalopathy, early infantile, 13,
PSMC3IP	614324~Ovarian dysgenesis 3,
NRXN1	614325~Pitt-Hopkins-like syndrome 2,614332~Schizophrenia, susceptibility to, 17,
BAP1	614327~Tumor predisposition syndrome,
ADAM17	614328~Inflammatory skin and bowel disease, neonatal, 1,
MYBPC1	614335~Arthrogryposis, distal, type 1B,614915~Lethal congenital contracture syndrome 4,
LINS1	614340~Mental retardation, autosomal recessive 27,
WDR19	614376~Short-rib thoracic dysplasia 5 with or without polydactyly,614377~Nephronophthisis 13,614378~Cranioectodermal dysplasia 4,616307~Senior-Loken syndrome 8,
POLR3B	614381~Leukodystrophy, hypomyelinating, 8, with or without oligodontia and/or hypogonadotropic hypogonadism,
DNM1L	614388~Encephalopahty, lethal, due to defective mitochondrial peroxisomal fission,
ANXA5	614391~Pregnancy loss, recurrent, susceptibility to, 3,
MEGF10	614399~Myopathy, areflexia, respiratory distress, and dysphagia, early-onset,614399~Myopathy, areflexia, respiratory distress, and dysphagia, early-onset, mild variant,
GLCCI1	614400~Glucocorticoid therapy, response to,
MDM2	614401~Accelerated tumor formation, susceptibility to,
GBA2	614409~Spastic paraplegia 46, autosomal recessive,
CYP26B1	614416~Craniosynostosis with radiohumeral fusions and other skeletal and craniofacial anomalies,
CPA6	614417~Epilepsy, familial temporal lobe, 5,614418~Febrile seizures, familial, 11,
GOT1	614419~Aspartate aminotransferase, serum level of, QTL1,
DNASE1L3	614420~Systemic lupus erythematosus 16,
TMEM237	614424~Joubert syndrome 14,
LRSAM1	614436~Charcot-Marie-Toothe disease, axonal, type 2P,
SLCO2A1	614441~Hypertrophic osteoarthropathy, primary, autosomal recessive 2,
TPK1	614458~Thiamine metabolism dysfunction syndrome 5 (episodic encephalopathy type),
LIAS	614462~Pyruvate dehydrogenase lipoic acid synthetase deficiency,
CEP41	614464~Joubert syndrome 15,
MMP3	614466~Coronary heart disease, susceptibility to, 6,
PLCG2	614468~Familial cold autoinflammatory syndrome 3,614878~Autoinflammation, antibody deficiency, and immune dysregulation syndrome,
COL4A2	614483~Porencephaly 2,614519~Hemorrhage, intracerebral, susceptibility to,
WIPF1	614493~Wiskott-Aldrich syndrome 2,
KLHL3	614495~Pseudohypoaldosteronism, type IID,
CUL3	614496~Pseudohypoaldosteronism, type IIE,
BRAT1	614498~Rigidity and multifocal seizure syndrome, lethal neonatal,
CRADD	614499~Mental retardation, autosomal recessive 34,
C8ORF37	614500~Cone-rod dystrophy 16,614500~Retinitis pigmentosa 64,
CYP2B6	614546~Efavirenz central nervous system toxicity, susceptibility to,614546~Efavirenz, poor metabolism of,
ACO2	614559~Infantile cerebellar-retinal degeneration,616289~Optic atrophy 9,
ARID1B	614562~Mental retardation, autosomal dominant 12,
COG6	614576~Congenital disorder of glycosylation, type IIl,615328~Shaheen syndrome,
MRPL3	614582~Combined oxidative phosphorylation deficiency 9,
TRPV3	614594~Olmsted syndrome,616400~Palmoplantar keratoderma, nonepidermolytic, focal 2,
CORIN	614595~Preeclampsia/eclampsia 5,
ARID1A	614607~Mental retardation, autosomal dominant 14,
CEACAM16	614614~Deafness, autosomal dominant 4B,
GUCY2C	614616~Diarrhea 6,614665~Meconium ileus,
SLC6A5	614618~Hyperekplexia 3,
GLRB	614619~Hyperekplexia 2, autosomal recessive,
UVSSA	614640~UV-sensitive syndrome 3,
PDSS1	614651~Coenzyme Q10 deficiency, primary, 2,
PDSS2	614652~Coenzyme Q10 deficiency, primary, 3,
DST	614653~Neuropathy, hereditary sensory and autonomic, type VI,615425~Epidermolysis bullosa simplex, autosomal recessive 2,
COQ9	614654~Coenzyme Q10 deficiency, primary, 5,
HSD11B1	614662~Cortisone reductase deficiency 2,
PLCB4	614669~Auriculocondylar syndrome 2,
CEP135	614673~Microcephaly 8, primary, autosomal recessive,
SRP72	614675~Bone marrow failure syndrome 1,
EXOSC3	614678~Pontocerebellar hypoplasia, type 1B,
IFITM3	614680~Influenza, severe, susceptibility to,
IL6R	614689~Interleukin-6 receptor, soluble, serum level of, QTL,614752~Interleukin 6, serum level of, QTL,
MME	614692~Membranous glomerulonephritis, antenatal,614692~Neutral endopeptidase deficiency,
LRBA	614700~Immunodeficiency, common variable, 8, with autoimmunity,
RAD21	614701~Cornelia de Lange syndrome 4,
MTO1	614702~Combined oxidative phosphorylation deficiency 10,
SLC52A2	614707~Brown-Vialetto-Van Laere syndrome 2,
MVD	614714~Porokeratosis 7, multiple types,
TMEM165	614727~Congenital disorder of glycosylation, type IIk,
CEP63	614728~Seckel syndrome 6,
NNT	614736~Glucocorticoid deficiency 4,
SERAC1	614739~3-methylglutaconic aciduria with deafness, encephalopathy, and Leigh-like syndrome,
SEMA7A	614745~Blood group, John-Milton-Hagen system,
ITGA3	614748~Interstitial lung disease, nephrotic syndrome, and epidermolysis bullosa, congenital,
CAMTA1	614756~Cerebellar ataxia, nonprogressive, with mental retardation,
CFAP53	614779~Heterotaxy, visceral, 6, autosomal recessive,
NBAS	614800~Short stature, optic nerve atrophy, and Pelger-Huet anomaly,616483~Infantile liver failure syndrome 2,
CFHR5	614809~Nephropathy due to CFHR5 deficiency,
POC1A	614813~Short stature, onychodysplasia, facial dysmorphism, and hypotrichosis,
RBPJ	614814~Adams-Oliver syndrome 3,
TGFB2	614816~Loeys-Dietz syndrome 4,
FAN1	614817~Interstitial nephritis, karyomegalic,
SMAD6	614823~Aortic valve disease 2,
POMGNT2	614830~Muscular dystrophy-dystroglycanopathy (congenital with brain and eye anomalies, type A, 8,
GRM1	614831~Spinocerebellar ataxia, autosomal recessive 13,
RTTN	614833~Polymicrogyria with seizures,
TACR3	614840~Hypogonadotropic hypogonadism 11 with or without anosmia,
ZNF423	614844~Joubert syndrome 19,614844~Nephronophthisis 14,
CEP164	614845~Nephronophthisis 15,
TRAF3	614849~Herpes simplex encephalitis, susceptibility to, 3,
NIN	614851~Seckel syndrome 7,
BMP1	614856~Osteogenesis imperfecta, type XIII,
WDR11	614858~Hypogonadotropic hypogonadism 14 with or without anosmia,
CACNA1B	614860~Dystonia 23,
TSPEAR	614861~Deafness, autosomal recessive 98,
PEX6	614862~Peroxisome biogenesis disorder 4A (Zellweger),614863~Peroxisome biogenesis disorder 4B,616617~Heimler syndrome 2,
PEX2	614866~Peroxisome biogenesis disorder 5A (Zellweger),614867~Peroxisome biogenesis disorder 5B,
STK4	614868~T-cell immunodeficiency, recurrent infections, autoimmunity, and cardiac malformations,
DNAAF5	614874~Ciliary dyskinesia, primary, 18,
HS6ST1	614880~Hypogonadotropic hypogonadism 15 with or without anosmia,
PEX3	614882~Peroxisome biogenesis disorder 10A (Zellweger),
PEX13	614883~Peroxisome biogenesis disorder 11A (Zellweger),614885~Peroxisome biogenesis disorder 11B,
PEX14	614887~Peroxisome biogenesis disorder 13A (Zellweger),
IFNGR2	614889~Immunodeficiency 28, mycobacteriosis,
IL12B	614890~Immunodeficiency 29, mycobacteriosis,
CACNA1D	614896~Sinoatrial node dysfunction and deafness,615474~Primary aldosteronism, seizures, and neurologic abnormalities,
SEMA3A	614897~Hypogonadotropic hypogonadism 16 with or without anosmia,
VPS37A	614898~Spastic paraplegia 53, autosomal recessive,
PGM1	614921~Congenital disorder of glycosylation, type It,
RMND1	614922~Combined oxidative phosphorylation deficiency 11,
EARS2	614924~Combined oxidative phosphorylation deficiency 12,
PNPT1	614932~Combined oxidative phosphorylation deficiency 13,614934~Deafness, autosomal recessive 70,
LRRC6	614935~Ciliary dyskinesia, primary, 19,
EDARADD	614940~Ectodermal dysplasia 11A, hypohidrotic/hair/tooth type, autosomal dominant,614941~Ectodermal dysplasia 11B, hypohidrotic/hair/tooth type, autosomal recessive,
OTOGL	614944~Deafness, autosomal recessive 84B,
OTOG	614945~Deafness, autosomal recessive 18B,
FARS2	614946~Combined oxidative phosphorylation deficiency 14,
MTFMT	614947~Combined oxidative phosphorylation deficiency 15,
KCNT1	614959~Epileptic encephalopathy, early infantile, 14,615005~Epilepsy, nocturnal frontal lobe, 5,
CHMP1A	614961~Pontocerebellar hypoplasia, type 8,
LEPR	614963~Obesity, morbid, due to leptin receptor deficiency,
TMEM231	614970~Joubert syndrome 20,615397~Meckel syndrome 11,
TAB2	614980~Congenital heart defects, nonsyndromic, 2,
DGKE	615008~Hemolytic uremic syndrome, atypical, susceptibility to, 7,615008~Nephrotic syndrome, type 7,
PACS1	615009~Mental retardation, autosomal dominant 17,
CERS3	615023~Ichthyosis, congenital, autosomal recessive 9,
PNPLA1	615024~Ichthyosis, congenital, autosomal recessive 10,
SLC52A1	615026~Riboflavin deficiency,
EXPH5	615028~Epidermolysis bullosa, nonspecific, autosomal recessive,
CYP2U1	615030~Spastic paraplegia 56, autosomal recessive,
TECPR2	615031~Spastic paraplegia 49, autosomal recessive,
CHD8	615032~Autism, susceptibility to, 18,
DDHD2	615033~Spastic paraplegia 54, autosomal recessive,
ANO3	615034~Dystonia 24,
TRPA1	615040~Episodic pain syndrome, familial,
LRIT3	615058~Night blindness, congenital stationary (complete), 1F, autosomal recessive,
TMEM38B	615066~Osteogenesis imperfecta, type XIV,
CCDC114	615067~Ciliary dyskinesia, primary, 20,
LARP7	615071~Alazami syndrome,
GNAL	615073~Dystonia 25,
GATAD2B	615074~Mental retardation, autosomal dominant 18,
POLE	615083~Colorectal cancer, susceptibility to, 12,615139~FILS syndrome,
MGME1	615084~Mitochondrial DNA depletion syndrome 11,
SNX10	615085~Osteopetrosis, autosomal recessive 8,
EIF4E	615091~Autism, susceptibility to, 19,
MIB1	615092~Left ventricular noncompaction 7,
ZNF335	615095~Microcephaly 10, primary, autosomal recessive,
KLLN	615107~Cowden syndrome 4,
[truncated: 391 more rows]

## Sheet: C
C. Cancer genes in four databases that were disrupted by MEIs in CDS's.
Gene symbol	COSMIC Tier1&2	CCGD Gene	GAD cancer	OMIM cancer	Number of supporting databases
AADAC	0	1	0	0	1
AASS	0	1	0	0	1
ABCA1	0	1	1	0	2
ABCA5	0	0	1	0	1
ACOXL	0	1	1	0	2
ACSL1	0	1	0	0	1
ACSM4	0	1	0	0	1
ADAMTS12	0	1	0	0	1
ADGRE1	0	0	1	0	1
ADPRHL1	0	1	0	0	1
AFM	0	1	0	0	1
AGTR1	0	0	1	0	1
AGTR2	0	0	1	0	1
AGXT2	0	1	0	0	1
ALDH3A1	0	0	1	0	1
ALK	0	0	1	1	3
AMZ2	0	1	0	0	1
ANAPC1	0	1	0	0	1
ANGPTL4	0	1	0	0	1
ANKRD17	0	1	0	0	1
ANKRD45	0	1	0	0	1
ANXA9	0	1	1	0	2
APC	0	1	1	1	4
APOL3	0	0	1	0	1
APPL1	0	1	0	0	1
ARHGAP28	0	1	0	0	1
ARSB	0	1	0	0	1
ASPM	0	0	1	0	1
ASXL3	0	1	0	0	1
ASZ1	0	1	0	0	1
ATG2B	0	1	1	0	2
ATP2C2	0	1	0	0	1
ATP9B	0	1	0	0	1
ATRIP	0	1	1	0	2
ATRNL1	0	1	0	0	1
BAZ1A	0	1	0	0	2
BBOX1	0	1	0	0	1
BBS1	0	1	0	0	1
BCCIP	0	1	1	0	2
BCDIN3D	0	1	0	0	1
BLM	0	1	1	0	3
BNIPL	0	1	0	0	1
BOLA3	0	1	0	0	1
BRCA2	0	1	1	1	4
BRD4	0	0	0	0	1
BRIX1	0	1	0	0	1
BROX	0	1	0	0	1
C10ORF90	0	1	0	0	1
C12ORF60	0	1	0	0	1
C2CD3	0	1	0	0	1
C3ORF62	0	1	0	0	1
C8ORF34	0	1	0	0	1
CAAP1	0	1	0	0	1
CACNA1A	0	1	0	0	1
CADM1	0	1	0	0	1
CAMKK2	0	1	0	0	1
CARD6	0	1	0	0	1
CCDC18	0	1	0	0	1
CCDC33	0	1	0	0	1
CCNB1	0	0	1	0	1
CCT6B	0	1	0	0	1
CD180	0	0	1	0	1
CD36	0	0	1	0	1
CDC42EP3	0	0	1	0	1
CDK15	0	1	0	0	1
CENPF	0	0	1	0	1
CENPJ	0	1	0	0	1
CEP170B	0	1	0	0	1
CEP57L1	0	1	0	0	1
CEP70	0	1	0	0	1
CEP95	0	1	0	0	1
CERS4	0	1	1	0	2
CHAF1A	0	1	1	0	2
CHD2	0	1	0	0	2
CHPT1	0	1	0	0	1
CHRNA1	0	0	1	0	1
CLCA1	0	0	1	0	1
CLSPN	0	1	1	0	2
CLSTN1	0	1	0	0	1
CNOT1	0	1	0	0	1
CNTRL	0	1	1	0	3
COL12A1	0	0	1	0	1
COLGALT2	0	1	0	0	1
COPB1	0	1	0	0	1
COX4I2	0	1	1	0	2
CP	0	1	0	0	1
CPS1	0	1	0	0	1
CRK	0	1	0	0	1
CSMD3	0	1	0	0	2
CSPG4	0	1	0	0	1
CSPP1	0	1	0	0	1
CTR9	0	1	0	0	1
CXORF56	0	1	0	0	1
CYP2C18	0	0	1	0	1
CYP2C9	0	0	1	0	1
CYP2J2	0	1	0	0	1
CYP7A1	0	0	1	0	1
CYTH3	0	1	0	0	1
DACT2	0	1	0	0	1
DCUN1D2	0	1	0	0	1
DDX24	0	1	0	0	1
DDX25	0	1	1	0	2
DENND1B	0	1	0	0	1
DEPTOR	0	1	0	0	1
DGKE	0	1	0	0	1
DIAPH1	0	1	0	0	1
DLC1	0	1	1	1	3
DMXL2	0	1	0	0	1
DNAH11	0	0	1	0	1
DNAH12	0	1	1	0	2
DNAH2	0	1	0	0	1
DNAH7	0	1	1	0	2
DNAJC3	0	1	0	0	1
DNMT1	0	0	1	0	1
DPP6	0	1	1	0	2
ECHS1	0	1	0	0	1
EDRF1	0	1	0	0	1
EIF2A	0	1	0	0	1
EIF3E	0	1	0	0	2
ELOVL2	0	1	0	0	1
ENTPD2	0	1	0	0	1
EPB41L1	0	1	0	0	1
EPG5	0	1	1	0	2
EPSTI1	0	1	0	0	1
ERVFRD-1	0	1	0	0	1
ESCO1	0	1	1	0	2
EXO5	0	1	0	0	1
EXOSC10	0	1	0	0	1
EYS	0	0	1	0	1
FAM102B	0	1	0	0	1
FAM227B	0	1	0	0	1
FANCC	0	1	1	0	3
FANCI	0	1	1	0	2
FANCM	0	1	1	0	2
FAT2	0	1	0	0	1
FBRS	0	1	0	0	1
FBXL4	0	1	0	0	1
FIGN	0	1	0	0	1
FKBP4	0	1	0	0	1
FOLR2	0	1	0	0	1
FRMD4B	0	1	0	0	1
GABPB2	0	1	0	0	1
GABRG3	0	1	0	0	1
GALNT4	0	1	0	0	1
GART	0	1	1	0	2
GAS2L3	0	1	0	0	1
GCAT	0	1	0	0	1
GCNT2	0	1	1	0	2
GIGYF2	0	1	0	0	1
GIPC3	0	0	1	0	1
GMPPB	0	1	0	0	1
GPATCH1	0	1	0	0	1
GPR155	0	1	0	0	1
GPRIN3	0	1	0	0	1
GRID1	0	1	0	0	1
GRIN3B	0	1	0	0	1
GSPT2	0	0	1	0	1
GXYLT2	0	1	0	0	1
HACE1	0	1	1	0	2
HBS1L	0	1	0	0	1
HIVEP3	0	1	0	0	1
HJURP	0	1	0	0	1
HLA-DRB1	0	0	1	0	1
HM13	0	1	0	0	1
HMBOX1	0	1	0	0	1
HSPB11	0	1	0	0	1
HYKK	0	1	1	0	2
IBTK	0	1	0	0	1
ICA1	0	1	0	0	1
IFIT1	0	1	1	0	2
IFNA14	0	0	1	0	1
IFT80	0	1	0	0	1
IL1RAP	0	1	1	0	2
IL5	0	1	1	0	2
IPO11	0	1	0	0	1
IPO7	0	1	0	0	1
ITGA1	0	1	1	0	2
ITGA4	0	1	1	0	2
ITPKC	0	1	0	0	1
KAT5	0	1	0	0	1
KATNA1	0	1	1	0	2
KCNH8	0	1	1	0	2
KCTD11	0	1	0	0	1
KCTD2	0	1	0	0	1
KDELR3	0	1	0	0	1
KIF14	0	1	0	0	1
KIF16B	0	0	1	0	1
KIF20B	0	1	0	0	1
KIF22	0	1	0	0	1
KLHL13	0	1	0	0	1
KLHL24	0	1	0	0	1
KLHL8	0	1	0	0	1
LAMA2	0	1	1	0	2
LDHA	0	1	0	0	1
LMBR1L	0	1	0	0	1
LRBA	0	1	0	0	1
LRRC69	0	0	1	0	1
LRRC71	0	1	0	0	1
LRRFIP1	0	1	0	0	1
LTBP1	0	0	1	0	1
LUC7L2	0	1	0	0	1
LUM	0	0	1	0	1
LYPLA2	0	1	0	0	1
LZTFL1	0	1	0	0	1
MAF	0	0	0	0	1
MAGEC1	0	0	1	0	1
MAP3K11	0	1	0	0	1
MAP3K5	0	1	0	0	1
MAP3K8	0	1	0	1	2
MAPK10	0	1	0	0	1
MATR3	0	1	1	0	2
MC5R	0	1	0	0	1
MCM6	0	1	1	0	2
MCPH1	0	1	1	0	2
MCTP2	0	1	0	0	1
METTL23	0	1	0	0	1
METTL5	0	1	0	0	1
MGAM	0	1	0	0	1
MIA3	0	1	0	0	1
MITD1	0	1	0	0	1
MON2	0	1	0	0	1
MPDZ	0	1	0	0	1
MROH7	0	1	0	0	1
MRPL42	0	1	0	0	1
MSH6	0	1	1	1	4
MYBL1	0	1	0	0	1
MYO16	0	1	0	0	1
MYO18B	0	1	0	0	1
MYO6	0	1	0	0	1
MYPOP	0	1	0	0	1
N4BP2L2	0	1	0	0	1
NDUFA10	0	0	1	0	1
NEU3	0	1	0	0	1
NFE2L3	0	1	0	0	1
NFKBIZ	0	1	1	0	2
NGLY1	0	1	0	0	1
NIN	0	1	1	0	3
NLRP13	0	0	1	0	1
NOP9	0	1	0	0	1
NPAS3	0	1	0	0	1
NSMCE2	0	1	1	0	2
NVL	0	1	0	0	1
ONECUT2	0	1	0	0	1
OPTN	0	1	0	0	1
OR1D2	0	1	0	0	1
OR2V1	0	1	0	0	1
OSBPL1A	0	1	0	0	1
OVCH2	0	1	0	0	1
OXA1L	0	1	0	0	1
PALMD	0	1	0	0	1
PCDHGB1	0	1	0	0	1
PDZD4	0	1	0	0	1
PEX2	0	1	1	0	2
PGLYRP2	0	1	1	0	2
PHF12	0	1	0	0	1
PIBF1	0	1	0	0	1
PIGL	0	1	0	0	1
PIGQ	0	1	0	0	1
PIKFYVE	0	1	0	0	1
PKD2L2	0	1	0	0	1
PKP4	0	1	1	0	2
PLAUR	0	0	1	0	1
PLOD2	0	0	1	0	1
PMS2	0	0	1	1	3
PODXL	0	0	1	0	1
POMT1	0	1	1	0	2
PPA1	0	1	0	0	1
PPP1R12C	0	1	0	0	1
PPP1R3A	0	0	1	0	1
PSMD13	0	1	0	0	1
PTGR2	0	1	0	0	1
PTPN23	0	1	0	0	1
PTPRJ	0	1	1	1	3
PYGL	0	1	0	0	1
RAB18	0	1	0	0	1
RAD54B	0	1	1	1	3
RALGPS1	0	1	0	0	1
RASA2	0	1	0	0	1
RBM18	0	1	0	0	1
RBM39	0	1	0	0	1
RBMS1	0	1	0	0	1
RCBTB2	0	1	0	0	1
RIC8B	0	1	0	0	1
RNF213	0	0	0	0	1
RSC1A1	0	1	0	0	1
RTN3	0	1	1	0	2
RXFP1	0	1	0	0	1
RYR2	0	0	1	0	1
SARDH	0	1	0	0	1
SCAP	0	1	0	0	1
SDHB	0	0	1	1	3
SEC23IP	0	1	0	0	1
SEMA4G	0	1	1	0	2
SENP1	0	1	0	0	1
SERPING1	0	1	1	0	2
SETD3	0	1	0	0	1
SF3B2	0	1	0	0	1
SGTA	0	1	0	0	1
SH3D21	0	1	0	0	1
SLC25A13	0	1	0	0	1
SLC25A26	0	1	0	0	1
SLC25A41	0	1	0	0	1
SLC26A6	0	1	0	0	1
SLC30A1	0	0	1	0	1
SLC35A3	0	1	0	0	1
SLC38A10	0	1	0	0	1
SLC9C1	0	1	0	0	1
SNTG1	0	1	0	0	1
SNTN	0	1	0	0	1
SNX31	0	1	0	0	1
SPAG16	0	1	0	0	1
SPAG5	0	1	1	0	2
SPATC1	0	1	0	0	1
SPHKAP	0	0	1	0	1
SPTBN2	0	1	0	0	1
SPTBN4	0	1	0	0	1
SSC5D	0	1	0	0	1
ST7L	0	1	0	0	1
STAG3	0	0	1	0	1
STAMBPL1	0	1	0	0	1
SYMPK	0	1	0	0	1
SYNE2	0	1	0	0	1
TARBP1	0	1	0	0	1
TAX1BP1	0	1	1	0	2
TBC1D9B	0	1	0	0	1
TCEA1	0	1	0	0	2
TECPR2	0	1	0	0	1
TFRC	0	1	1	0	3
THRAP3	0	1	0	0	2
THUMPD3	0	1	0	0	1
TIPIN	0	1	0	0	1
TLL2	0	1	0	0	1
TM7SF3	0	1	0	0	1
TMEM87A	0	1	0	0	1
TMPRSS11A	0	0	1	0	1
TMTC1	0	1	0	0	1
TRAPPC13	0	1	0	0	1
TRIM24	0	1	0	0	2
TRIM28	0	1	0	0	1
TRIM33	0	1	0	0	2
TRIM37	0	1	0	0	1
TRIP4	0	1	0	0	1
TRPV1	0	1	0	0	1
TSC1	0	1	1	0	3
TTC6	0	0	1	0	1
TTN	0	1	0	0	1
TUT1	0	1	0	0	1
TWF1	0	0	1	0	1
UBE2N	0	1	0	0	1
UCHL5	0	1	0	0	1
UGP2	0	1	0	0	1
UGT1A7	0	0	1	0	1
UGT2B10	0	1	1	0	2
UGT2B28	0	1	0	0	1
USP12	0	1	0	0	1
USP16	0	1	0	0	1
USP34	0	1	0	0	1
VPS33A	0	1	0	0	1
WDR3	0	0	1	0	1
WDR78	0	1	0	0	1
WRAP53	0	1	1	0	2
XRCC2	0	0	1	0	1
YEATS2	0	1	0	0	1
ZC3H4	0	1	0	0	1
ZDHHC18	0	1	0	0	1
ZDHHC8	0	1	0	0	1
ZFAND1	0	1	0	0	1
ZFYVE16	0	1	0	0	1
ZGRF1	0	1	0	0	1
ZNF148	0	1	0	0	1
ZNF398	0	1	0	0	1
ZNF436	0	1	0	0	1
ZNF718	0	0	1	0	1
ZNF804B	0	1	0	0	1
ZNF98	0	0	1	0	1
ZSCAN21	0	1	0	0	1

## Sheet: D
Legends for Supplemental Table 7.
A. Disease categories with MEIs from our collection disrupting OMIM genes (Figure 6C).
Disease categories	Disease categories based on related phenotypes
OMIM phenotypes	OMIM annotated phenotypes
B. MEIs in genes with OMIM disease annotations.
Gene symbol	Gene symbol
OMIM phenotypes	OMIM annotated phenotypes
C. Cancer genes in four databases that were disrupted by MEIs in CDS's.
Gene symbol	Gene symbol
COSMIC Tier1&2	Catalogue of Somatic Mutations in Cancer (COSMIC), which contains Cancer Gene Census information for genes that have mutations implicated in cancer. Tier1 genes "possess a documented activity relevant to cancer, along with evidence of mutations in cancer which change the activity of the gene product in a way that promotes oncogenic transformation". Tier 2 genes have strong indications of a role i…
CCGD Gene	Candidate Cancer Gene Database (CCGD) is a collection of transposon-based forward cancer genetic screens in mice used to help assess candidacy of a gene in tumorigenesis. (http://ccgd-starrlab.oit.umn.edu/)
GAD cancer	Genetic Association Database is a database containing genentic association data from complex diseases and disorders. It has been retired and current data is from 9/1/2014. (http://geneticassociationdb.nih.gov/)
OMIM cancer	Online Mendelian Inheritance in Man is a database that contains manually curated human genes and their corresponding phenotypes. (http://omim.org)
Number of supporting databases	Sum of the number of databases that have annotations for the given gene.
